# Supplementary material for: Comparative analysis of the syncytiotrophoblast in placenta tissue and trophoblast organoids using snRNA sequencing
Source: bioRxiv preprint, doi:10.1101/2024.07.01.601571, version 2 (2025-02-19)
Supplement: SupplementalTable_Figure3B [file 601571_file03.xlsx]

## Sheet: STBsubtypesDEG_TO
	p_val	avg_log2FC	pct.1	pct.2	p_val_adj	cluster	gene
TEAD1	0	1.71953	0.645	0.425	0	STB-1	TEAD1
PEAK1	3.62102e-275	1.01235	0.793	0.654	1.13512e-270	STB-1	PEAK1
FHL2	1.3079e-239	1.24014	0.616	0.403	4.10001e-235	STB-1	FHL2
GNA12	1.05314e-235	1.02076	0.829	0.721	3.30137e-231	STB-1	GNA12
NOCT	7.98541e-229	1.59954	0.613	0.422	2.50327e-224	STB-1	NOCT
SEMA6A	5.90956e-226	0.909314	0.877	0.782	1.85253e-221	STB-1	SEMA6A
LMO4	1.15136e-216	1.16	0.723	0.576	3.60928e-212	STB-1	LMO4
SLC2A14	1.7125e-212	1.99752	0.345	0.149	5.36836e-208	STB-1	SLC2A14
UBASH3B	1.73713e-207	1.4369	0.495	0.285	5.44556e-203	STB-1	UBASH3B
ZNRF2	1.56985e-205	0.808327	0.836	0.716	4.92117e-201	STB-1	ZNRF2
SEMA6A-AS1	2.68148e-201	1.11709	0.713	0.543	8.40589e-197	STB-1	SEMA6A-AS1
MPDZ	4.05184e-201	1.59841	0.415	0.214	1.27017e-196	STB-1	MPDZ
MANBA	4.11034e-196	1.00888	0.659	0.48	1.28851e-191	STB-1	MANBA
USP53	1.49514e-192	0.609043	0.906	0.87	4.68697e-188	STB-1	USP53
PLK2	3.92391e-187	1.22657	0.543	0.348	1.23007e-182	STB-1	PLK2
SLC22A23	4.16103e-187	1.14056	0.617	0.443	1.3044e-182	STB-1	SLC22A23
MBNL2	4.46161e-187	0.985975	0.784	0.676	1.39862e-182	STB-1	MBNL2
SASH1	1.30044e-177	0.774286	0.883	0.781	4.07661e-173	STB-1	SASH1
PEG3	7.31969e-176	0.984313	0.83	0.744	2.29458e-171	STB-1	PEG3
FOXJ3	8.095e-176	0.635037	0.881	0.819	2.53762e-171	STB-1	FOXJ3
OSBPL9	1.27221e-175	1.0037	0.7	0.575	3.98814e-171	STB-1	OSBPL9
ARL15	3.74804e-175	1.23896	0.672	0.527	1.17493e-170	STB-1	ARL15
SREBF2	1.44146e-173	0.494394	0.971	0.964	4.51869e-169	STB-1	SREBF2
FMNL2	1.5908e-171	1.83363	0.526	0.359	4.98683e-167	STB-1	FMNL2
KIAA1217	5.66262e-171	0.983187	0.79	0.702	1.77512e-166	STB-1	KIAA1217
FAM83B	1.27234e-170	0.68909	0.797	0.688	3.98852e-166	STB-1	FAM83B
AGAP1	2.3632e-165	0.6328	0.939	0.91	7.40816e-161	STB-1	AGAP1
LINC01176	2.87739e-162	0.958228	0.604	0.428	9.02003e-158	STB-1	LINC01176
FNBP1L	5.36778e-161	0.967075	0.618	0.447	1.68269e-156	STB-1	FNBP1L
AMZ1	9.35095e-161	0.980751	0.688	0.535	2.93134e-156	STB-1	AMZ1
TANC2	3.88201e-160	1.24588	0.645	0.52	1.21693e-155	STB-1	TANC2
AC006115.2	8.63396e-155	1.09816	0.712	0.58	2.70657e-150	STB-1	AC006115.2
EEA1	8.44035e-154	0.574965	0.855	0.791	2.64588e-149	STB-1	EEA1
TENM3	8.81968e-154	0.854077	0.943	0.926	2.76479e-149	STB-1	TENM3
TCF7L2	5.62642e-150	1.33527	0.472	0.308	1.76377e-145	STB-1	TCF7L2
SMG1	2.34943e-147	0.473148	0.893	0.855	7.365e-143	STB-1	SMG1
ZNF765	3.09035e-145	0.702909	0.803	0.697	9.68762e-141	STB-1	ZNF765
RAD23B	4.70094e-143	0.422876	0.946	0.932	1.47365e-138	STB-1	RAD23B
ESYT2	1.34364e-141	0.460978	0.971	0.96	4.21206e-137	STB-1	ESYT2
PTK2	6.83886e-139	0.458353	0.935	0.914	2.14384e-134	STB-1	PTK2
AP002762.2	1.73427e-138	1.56276	0.297	0.142	5.43658e-134	STB-1	AP002762.2
EP300	4.80837e-138	0.466811	0.911	0.885	1.50733e-133	STB-1	EP300
PXN	5.95754e-138	1.29025	0.478	0.324	1.86757e-133	STB-1	PXN
ERBIN	1.35049e-137	0.776168	0.669	0.539	4.23353e-133	STB-1	ERBIN
RAPGEF1	3.11431e-137	0.834622	0.775	0.686	9.76272e-133	STB-1	RAPGEF1
DSP	7.89438e-137	0.655139	0.932	0.901	2.47473e-132	STB-1	DSP
SH3BP4	8.19704e-137	1.2001	0.472	0.311	2.56961e-132	STB-1	SH3BP4
PSAP	4.32851e-135	0.465431	0.976	0.965	1.3569e-130	STB-1	PSAP
RC3H1	8.0576e-135	0.606126	0.787	0.702	2.5259e-130	STB-1	RC3H1
INPP4A	4.45321e-134	0.900368	0.601	0.464	1.39599e-129	STB-1	INPP4A
PARD3	5.02042e-134	0.836724	0.73	0.619	1.5738e-129	STB-1	PARD3
ANO6	1.90911e-133	0.636244	0.821	0.766	5.98469e-129	STB-1	ANO6
FBXL5	5.28408e-133	0.881882	0.607	0.464	1.65645e-128	STB-1	FBXL5
DENND4C	7.90111e-132	0.886573	0.673	0.568	2.47684e-127	STB-1	DENND4C
NR6A1	5.42206e-131	0.617091	0.834	0.764	1.69971e-126	STB-1	NR6A1
NFAT5	1.18264e-130	0.382559	0.963	0.948	3.70733e-126	STB-1	NFAT5
NSD3	1.2942e-129	0.529435	0.881	0.831	4.05706e-125	STB-1	NSD3
DPP4	3.51359e-129	0.951	0.786	0.701	1.10144e-124	STB-1	DPP4
TMC1	1.44596e-128	0.681806	0.783	0.693	4.5328e-124	STB-1	TMC1
NEK6	4.78631e-127	1.44672	0.327	0.179	1.50041e-122	STB-1	NEK6
RNF149	2.75183e-126	0.544001	0.847	0.787	8.62642e-122	STB-1	RNF149
PERP	1.38854e-125	0.678387	0.855	0.791	4.35281e-121	STB-1	PERP
KIAA0355	2.07298e-125	0.46217	0.924	0.89	6.49838e-121	STB-1	KIAA0355
HIF1A-AS3	9.73413e-123	1.10477	0.551	0.396	3.05146e-118	STB-1	HIF1A-AS3
SPAG9	2.90954e-122	0.666105	0.815	0.75	9.12083e-118	STB-1	SPAG9
ARID3A	2.32613e-121	0.49408	0.931	0.883	7.29195e-117	STB-1	ARID3A
YEATS2	3.44404e-121	1.13782	0.44	0.289	1.07964e-116	STB-1	YEATS2
AC015923.1	8.44978e-120	1.4171	0.384	0.238	2.64884e-115	STB-1	AC015923.1
PAX8-AS1	7.20176e-119	1.26461	0.361	0.211	2.25761e-114	STB-1	PAX8-AS1
ACOX1	2.32729e-117	0.898363	0.547	0.401	7.29559e-113	STB-1	ACOX1
STK4	3.24352e-117	0.710883	0.654	0.528	1.01678e-112	STB-1	STK4
NAV2	2.24909e-116	1.52871	0.359	0.218	7.05045e-112	STB-1	NAV2
P4HA1	2.41125e-115	1.07736	0.58	0.451	7.5588e-111	STB-1	P4HA1
KAT2B	4.31946e-115	1.00452	0.437	0.283	1.35406e-110	STB-1	KAT2B
HIF1A	9.08717e-115	0.884169	0.689	0.568	2.84865e-110	STB-1	HIF1A
PHF20	4.90413e-114	0.940321	0.493	0.348	1.53735e-109	STB-1	PHF20
MYOF	5.03483e-114	0.455673	0.93	0.886	1.57832e-109	STB-1	MYOF
TRA2A	1.4959e-113	0.35595	0.94	0.927	4.68936e-109	STB-1	TRA2A
DAAM1	1.78091e-113	0.890817	0.554	0.412	5.5828e-109	STB-1	DAAM1
KLF6	2.9154e-113	0.859825	0.612	0.474	9.1392e-109	STB-1	KLF6
PVT1	5.38766e-113	1.11691	0.477	0.331	1.68892e-108	STB-1	PVT1
PIAS1	2.01794e-112	0.5901	0.816	0.77	6.32583e-108	STB-1	PIAS1
PPARG	9.61936e-112	0.579844	0.818	0.744	3.01548e-107	STB-1	PPARG
ATG9B	3.9682e-111	1.67181	0.395	0.249	1.24395e-106	STB-1	ATG9B
TTLL5	5.54889e-111	0.755351	0.752	0.675	1.73947e-106	STB-1	TTLL5
SYNJ2	2.33498e-110	0.643618	0.712	0.589	7.31968e-106	STB-1	SYNJ2
AFDN	2.57402e-110	0.490512	0.876	0.841	8.06903e-106	STB-1	AFDN
SNX27	5.14959e-110	0.710101	0.674	0.57	1.61429e-105	STB-1	SNX27
ZFP36L1	3.25739e-109	0.759215	0.837	0.782	1.02113e-104	STB-1	ZFP36L1
SLC25A13	2.26018e-106	0.933113	0.541	0.413	7.08521e-102	STB-1	SLC25A13
LINC01090	4.25483e-106	0.465724	0.962	0.939	1.3338e-101	STB-1	LINC01090
RBFOX2	7.99323e-105	0.792691	0.629	0.519	2.50572e-100	STB-1	RBFOX2
ELF2	2.74511e-104	0.638318	0.795	0.737	8.60536e-100	STB-1	ELF2
GBE1	7.65167e-104	0.853594	0.658	0.554	2.39865e-99	STB-1	GBE1
MKLN1	8.59437e-104	0.424097	0.914	0.89	2.69416e-99	STB-1	MKLN1
CITED2	9.15495e-104	1.11635	0.371	0.226	2.86989e-99	STB-1	CITED2
ECHDC2	4.19145e-103	1.24157	0.33	0.194	1.31394e-98	STB-1	ECHDC2
RBM39	1.31014e-102	0.298581	0.974	0.968	4.10704e-98	STB-1	RBM39
PITPNB	2.36396e-102	0.57301	0.721	0.638	7.41055e-98	STB-1	PITPNB
PKP2	5.04485e-102	0.779612	0.731	0.65	1.58146e-97	STB-1	PKP2
ADCY10	6.95238e-102	1.26198	0.326	0.189	2.17943e-97	STB-1	ADCY10
FOXN3	1.94169e-101	0.790209	0.7	0.613	6.08679e-97	STB-1	FOXN3
CSNK1A1	3.37999e-101	0.337529	0.955	0.946	1.05956e-96	STB-1	CSNK1A1
FAM160A1	1.28928e-100	0.679411	0.694	0.6	4.04163e-96	STB-1	FAM160A1
LUC7L3	2.08881e-100	0.436355	0.87	0.835	6.548e-96	STB-1	LUC7L3
PPP1R21	2.65932e-100	0.581392	0.758	0.695	8.33644e-96	STB-1	PPP1R21
EGLN3	4.88573e-100	0.666668	0.688	0.576	1.53158e-95	STB-1	EGLN3
TMOD3	6.26551e-100	0.502639	0.793	0.739	1.96411e-95	STB-1	TMOD3
PUM2	2.38719e-99	0.293333	0.964	0.964	7.48336e-95	STB-1	PUM2
ZNF326	2.47103e-99	0.633008	0.725	0.622	7.74619e-95	STB-1	ZNF326
ERC1	4.02537e-99	0.307245	0.971	0.977	1.26187e-94	STB-1	ERC1
PNCK	5.19597e-99	0.957257	0.419	0.276	1.62883e-94	STB-1	PNCK
ASAP1	6.63569e-99	0.487127	0.876	0.811	2.08015e-94	STB-1	ASAP1
CC2D2A	1.16814e-98	1.28758	0.394	0.256	3.66187e-94	STB-1	CC2D2A
AL513164.1	2.01185e-98	0.850732	0.525	0.381	6.30673e-94	STB-1	AL513164.1
AC099520.1	2.59153e-98	0.827149	0.702	0.621	8.12392e-94	STB-1	AC099520.1
MRPS6	3.10691e-98	0.942706	0.492	0.363	9.73954e-94	STB-1	MRPS6
RLF	3.95381e-98	0.480955	0.839	0.786	1.23944e-93	STB-1	RLF
LEPR	6.2321e-98	0.839002	0.526	0.388	1.95364e-93	STB-1	LEPR
BNIP3L	1.11545e-96	0.349267	0.845	0.766	3.49672e-92	STB-1	BNIP3L
VPS13C	2.52223e-96	0.875395	0.532	0.415	7.90667e-92	STB-1	VPS13C
ARHGEF7	4.43919e-96	0.556051	0.731	0.649	1.3916e-91	STB-1	ARHGEF7
CLIP1	7.85742e-96	0.285833	0.992	0.991	2.46314e-91	STB-1	CLIP1
PPFIBP1	2.89643e-94	0.516841	0.801	0.711	9.07974e-90	STB-1	PPFIBP1
PARD6B	3.13888e-94	0.636787	0.764	0.682	9.83978e-90	STB-1	PARD6B
AL356124.1	1.01964e-93	0.880654	0.607	0.491	3.19636e-89	STB-1	AL356124.1
LAMA2	1.25222e-93	1.04103	0.465	0.333	3.92547e-89	STB-1	LAMA2
FBXO42	2.04741e-93	0.476918	0.861	0.829	6.41822e-89	STB-1	FBXO42
SETD3	2.85065e-93	0.946391	0.482	0.356	8.93621e-89	STB-1	SETD3
OGA	3.26463e-93	0.495226	0.843	0.805	1.0234e-88	STB-1	OGA
DOCK1	3.35528e-93	0.525628	0.803	0.743	1.05181e-88	STB-1	DOCK1
SLC5A3	5.82929e-93	0.883284	0.512	0.392	1.82736e-88	STB-1	SLC5A3
CDK17	1.39418e-92	0.531748	0.779	0.706	4.37047e-88	STB-1	CDK17
GABRE	1.58064e-92	0.891828	0.459	0.322	4.955e-88	STB-1	GABRE
TET3	2.32104e-91	1.02518	0.348	0.216	7.27599e-87	STB-1	TET3
TOR1AIP2	4.8637e-91	0.363028	0.943	0.925	1.52467e-86	STB-1	TOR1AIP2
NUP153	8.3446e-91	0.486895	0.818	0.772	2.61586e-86	STB-1	NUP153
CHD2	1.17389e-90	0.279108	0.99	0.984	3.6799e-86	STB-1	CHD2
UBE2H	3.38014e-90	0.356591	0.932	0.928	1.0596e-85	STB-1	UBE2H
NIPBL	3.92784e-90	0.392008	0.876	0.859	1.2313e-85	STB-1	NIPBL
GATA3	5.53276e-90	0.456507	0.944	0.921	1.73441e-85	STB-1	GATA3
CCDC82	7.80459e-90	1.15335	0.275	0.152	2.44658e-85	STB-1	CCDC82
CYP2J2	3.15628e-89	1.25082	0.401	0.277	9.89431e-85	STB-1	CYP2J2
PPP1R12B	4.28084e-89	0.420338	0.883	0.861	1.34196e-84	STB-1	PPP1R12B
TACC1	2.76666e-88	0.835549	0.578	0.465	8.67294e-84	STB-1	TACC1
FNIP1	3.06725e-88	0.394973	0.934	0.917	9.61521e-84	STB-1	FNIP1
TLE4	3.97325e-88	0.91285	0.522	0.406	1.24553e-83	STB-1	TLE4
AC002377.1	4.6486e-88	1.13156	0.296	0.171	1.45724e-83	STB-1	AC002377.1
GAB1	1.01935e-87	0.477887	0.881	0.859	3.19547e-83	STB-1	GAB1
PTBP3	1.64602e-87	0.482196	0.809	0.768	5.15993e-83	STB-1	PTBP3
MBTD1	4.28347e-87	0.568643	0.789	0.741	1.34278e-82	STB-1	MBTD1
PICALM	9.17771e-87	0.471427	0.832	0.801	2.87703e-82	STB-1	PICALM
PAN3	1.11877e-86	0.399117	0.871	0.851	3.50711e-82	STB-1	PAN3
RBMX	1.29847e-86	0.813354	0.47	0.342	4.07043e-82	STB-1	RBMX
LPCAT1	1.40021e-86	0.873553	0.616	0.515	4.38939e-82	STB-1	LPCAT1
GCNT2	3.9616e-86	0.596096	0.72	0.623	1.24188e-81	STB-1	GCNT2
PAPOLA	4.92255e-86	0.388805	0.872	0.853	1.54312e-81	STB-1	PAPOLA
PRPF4B	5.11271e-86	0.352235	0.943	0.927	1.60273e-81	STB-1	PRPF4B
ECE1	2.1483e-85	0.818206	0.535	0.412	6.73448e-81	STB-1	ECE1
YAP1	3.06821e-85	0.476121	0.836	0.805	9.61822e-81	STB-1	YAP1
PRRC2B	3.77696e-85	0.426326	0.853	0.815	1.184e-80	STB-1	PRRC2B
DNAJB6	4.89728e-85	0.38983	0.922	0.892	1.5352e-80	STB-1	DNAJB6
RB1CC1	2.56558e-84	0.55116	0.737	0.665	8.04257e-80	STB-1	RB1CC1
ARIH2	4.45439e-84	0.532514	0.695	0.614	1.39636e-79	STB-1	ARIH2
SHB	5.69799e-84	1.09983	0.344	0.219	1.78621e-79	STB-1	SHB
KMT2A	6.17954e-84	1.19745	0.26	0.144	1.93716e-79	STB-1	KMT2A
MDM2	6.65206e-84	0.490983	0.882	0.858	2.08529e-79	STB-1	MDM2
DDB1	8.59333e-84	0.563739	0.801	0.736	2.69384e-79	STB-1	DDB1
STS	9.38117e-84	0.637079	0.815	0.741	2.94081e-79	STB-1	STS
NEBL	1.10551e-83	0.431949	0.969	0.975	3.46554e-79	STB-1	NEBL
MAFG	1.36229e-83	0.660494	0.658	0.561	4.27051e-79	STB-1	MAFG
RSRP1	4.20515e-83	0.47529	0.834	0.783	1.31823e-78	STB-1	RSRP1
NPAS3	9.12574e-83	1.18967	0.445	0.312	2.86074e-78	STB-1	NPAS3
CTSL	1.1101e-82	0.517852	0.832	0.778	3.47995e-78	STB-1	CTSL
AHNAK	2.61117e-82	0.666016	0.828	0.788	8.1855e-78	STB-1	AHNAK
AC018754.1	2.67319e-82	1.55189	0.462	0.355	8.3799e-78	STB-1	AC018754.1
MEF2A	9.9782e-82	1.05588	0.361	0.241	3.12797e-77	STB-1	MEF2A
ELF1	3.42597e-81	0.407368	0.877	0.847	1.07397e-76	STB-1	ELF1
RIC1	3.65013e-81	0.492737	0.747	0.678	1.14424e-76	STB-1	RIC1
SLC22A11	5.6906e-81	0.964558	0.476	0.356	1.78389e-76	STB-1	SLC22A11
MPHOSPH8	9.91289e-80	0.541652	0.714	0.625	3.10749e-75	STB-1	MPHOSPH8
TP63	1.5621e-79	1.27603	0.328	0.212	4.89686e-75	STB-1	TP63
AC098829.1	1.74848e-79	1.50907	0.266	0.154	5.48113e-75	STB-1	AC098829.1
PRDM2	1.82668e-79	0.513301	0.723	0.659	5.72627e-75	STB-1	PRDM2
SCD	2.44823e-79	0.393804	0.939	0.914	7.67471e-75	STB-1	SCD
GPBP1	2.88894e-79	0.285932	0.936	0.928	9.05625e-75	STB-1	GPBP1
RALGPS2	3.02199e-78	0.99827	0.342	0.222	9.47335e-74	STB-1	RALGPS2
DSC2	3.27033e-78	0.644611	0.65	0.564	1.02518e-73	STB-1	DSC2
SLC2A3	7.42163e-78	0.771442	0.742	0.688	2.32653e-73	STB-1	SLC2A3
LINC01091	1.02157e-77	0.541092	0.761	0.686	3.20242e-73	STB-1	LINC01091
MAML2	1.83935e-77	0.49105	0.887	0.864	5.76601e-73	STB-1	MAML2
FBXW7	4.41828e-77	0.426955	0.871	0.852	1.38504e-72	STB-1	FBXW7
RASSF3	5.0835e-77	0.649295	0.587	0.486	1.59357e-72	STB-1	RASSF3
ARHGAP32	6.84165e-77	0.564362	0.716	0.652	2.14472e-72	STB-1	ARHGAP32
ATRN	8.98464e-77	0.842476	0.419	0.299	2.81651e-72	STB-1	ATRN
FOXO3	1.22461e-76	0.549787	0.767	0.701	3.83891e-72	STB-1	FOXO3
AC119674.1	1.49972e-76	1.22854	0.387	0.27	4.70134e-72	STB-1	AC119674.1
EXOC1	1.87127e-76	0.679268	0.597	0.501	5.86605e-72	STB-1	EXOC1
ANKHD1	3.61917e-76	0.374027	0.866	0.842	1.13454e-71	STB-1	ANKHD1
AK4	4.12087e-76	0.648251	0.564	0.449	1.29181e-71	STB-1	AK4
DCAF6	7.79393e-76	0.693456	0.657	0.585	2.44324e-71	STB-1	DCAF6
QSER1	8.23232e-76	1.13519	0.279	0.166	2.58067e-71	STB-1	QSER1
GLS	1.58408e-75	0.752256	0.567	0.463	4.96578e-71	STB-1	GLS
PAFAH1B1	1.59682e-75	0.352186	0.925	0.914	5.00571e-71	STB-1	PAFAH1B1
GOLGB1	4.98388e-75	0.363334	0.917	0.903	1.56235e-70	STB-1	GOLGB1
VGLL4	1.74433e-74	0.752325	0.57	0.471	5.46814e-70	STB-1	VGLL4
NXNL2	2.15843e-74	1.0548	0.322	0.205	6.76625e-70	STB-1	NXNL2
NUP107	3.72502e-74	0.756668	0.59	0.491	1.16772e-69	STB-1	NUP107
AL161430.1	3.85744e-74	1.00538	0.306	0.191	1.20923e-69	STB-1	AL161430.1
TMEM131	5.2772e-74	0.408525	0.834	0.801	1.6543e-69	STB-1	TMEM131
MACF1	8.90949e-74	0.347838	0.95	0.951	2.79295e-69	STB-1	MACF1
PDK1	1.15821e-73	1.08598	0.325	0.213	3.63076e-69	STB-1	PDK1
FRYL	1.2579e-73	0.680383	0.607	0.517	3.94327e-69	STB-1	FRYL
TUFT1	1.42863e-73	0.832483	0.456	0.338	4.47848e-69	STB-1	TUFT1
PAK2	1.71245e-73	0.64041	0.584	0.484	5.36818e-69	STB-1	PAK2
RIF1	2.25632e-73	0.380361	0.837	0.8	7.0731e-69	STB-1	RIF1
ADAM9	2.27905e-73	0.524867	0.743	0.673	7.14437e-69	STB-1	ADAM9
ELK3	7.45366e-73	0.836082	0.476	0.357	2.33657e-68	STB-1	ELK3
TAF1D	7.72318e-73	0.373515	0.889	0.869	2.42106e-68	STB-1	TAF1D
ITGB1	2.00051e-72	0.530342	0.7	0.64	6.27119e-68	STB-1	ITGB1
PI4KA	2.24183e-72	0.36699	0.883	0.87	7.02768e-68	STB-1	PI4KA
TJP1	3.8003e-72	0.821136	0.489	0.379	1.19132e-67	STB-1	TJP1
IPMK	3.89807e-72	0.866676	0.403	0.286	1.22197e-67	STB-1	IPMK
FAM120A	3.98215e-72	0.360221	0.966	0.956	1.24832e-67	STB-1	FAM120A
CTTN	4.08274e-72	0.418146	0.811	0.765	1.27986e-67	STB-1	CTTN
RB1	5.52453e-72	1.01206	0.286	0.174	1.73183e-67	STB-1	RB1
ATP11B	6.413e-72	1.14937	0.318	0.208	2.01035e-67	STB-1	ATP11B
UGP2	6.67668e-72	0.542594	0.784	0.73	2.09301e-67	STB-1	UGP2
NUDT4	1.9031e-71	0.57397	0.662	0.583	5.96584e-67	STB-1	NUDT4
ZNF207	4.00797e-71	0.299776	0.921	0.913	1.25642e-66	STB-1	ZNF207
ATP13A3	4.6596e-71	0.525154	0.715	0.65	1.46069e-66	STB-1	ATP13A3
DLX6-AS1	4.70309e-71	1.28244	0.258	0.154	1.47432e-66	STB-1	DLX6-AS1
ARHGAP18	7.8538e-71	0.464832	0.827	0.765	2.46201e-66	STB-1	ARHGAP18
BIN2	1.04956e-70	0.562212	0.653	0.551	3.29017e-66	STB-1	BIN2
GPC5	1.27227e-70	1.32218	0.413	0.297	3.9883e-66	STB-1	GPC5
OXSR1	1.49445e-70	0.497112	0.753	0.697	4.68482e-66	STB-1	OXSR1
PTTG1IP	2.06172e-70	0.419129	0.882	0.839	6.46307e-66	STB-1	PTTG1IP
SQLE	2.11968e-70	0.404731	0.926	0.913	6.64478e-66	STB-1	SQLE
SHOC2	2.42005e-70	0.605438	0.684	0.616	7.58638e-66	STB-1	SHOC2
MAPKBP1	7.77604e-70	0.68862	0.585	0.497	2.43763e-65	STB-1	MAPKBP1
ARHGAP21	1.4924e-69	0.521135	0.78	0.726	4.67838e-65	STB-1	ARHGAP21
TNRC6A	1.49294e-69	0.833383	0.467	0.359	4.68005e-65	STB-1	TNRC6A
SLC20A2	1.49638e-69	0.795986	0.53	0.438	4.69086e-65	STB-1	SLC20A2
DDX17	3.26487e-69	0.313341	0.913	0.916	1.02347e-64	STB-1	DDX17
NF1	3.50161e-69	0.402294	0.843	0.828	1.09768e-64	STB-1	NF1
APLP2	5.5648e-69	0.343816	0.903	0.879	1.74445e-64	STB-1	APLP2
AMOTL2	1.47807e-68	0.985446	0.344	0.234	4.63346e-64	STB-1	AMOTL2
SMAD5	1.73696e-68	0.894342	0.353	0.242	5.44502e-64	STB-1	SMAD5
FOXK2	3.50588e-68	0.393545	0.822	0.787	1.09902e-63	STB-1	FOXK2
VEGFA	4.7788e-68	1.03948	0.311	0.2	1.49806e-63	STB-1	VEGFA
FAR1	5.51601e-68	0.878918	0.358	0.244	1.72916e-63	STB-1	FAR1
LIMA1	6.30549e-68	0.524595	0.685	0.617	1.97664e-63	STB-1	LIMA1
WDR20	6.49188e-68	0.334852	0.856	0.832	2.03508e-63	STB-1	WDR20
AC022137.4	9.20563e-68	0.597345	0.755	0.684	2.88578e-63	STB-1	AC022137.4
CAPZA1	6.39145e-67	0.388302	0.83	0.803	2.00359e-62	STB-1	CAPZA1
DUSP14	6.94508e-67	1.11379	0.263	0.159	2.17714e-62	STB-1	DUSP14
SUCO	1.44152e-66	0.561252	0.645	0.566	4.51886e-62	STB-1	SUCO
TRIO	2.0345e-66	0.747391	0.69	0.629	6.37776e-62	STB-1	TRIO
CMC1	2.58216e-66	1.04272	0.275	0.17	8.09455e-62	STB-1	CMC1
PGAP1	2.68104e-66	0.911916	0.35	0.241	8.40452e-62	STB-1	PGAP1
SLC1A3	3.68406e-66	0.824337	0.418	0.309	1.15488e-61	STB-1	SLC1A3
SMS	5.23418e-66	0.295935	0.92	0.881	1.64081e-61	STB-1	SMS
ZFYVE26	6.56538e-66	0.671347	0.554	0.449	2.05811e-61	STB-1	ZFYVE26
RAB1A	6.63403e-66	0.280099	0.953	0.944	2.07964e-61	STB-1	RAB1A
GNB1	9.47583e-66	0.502619	0.679	0.61	2.97048e-61	STB-1	GNB1
KIF13B	1.2073e-65	0.874156	0.385	0.276	3.78465e-61	STB-1	KIF13B
FYCO1	1.34636e-65	1.0378	0.285	0.18	4.22058e-61	STB-1	FYCO1
ZDHHC20	4.49374e-65	0.36602	0.867	0.851	1.4087e-60	STB-1	ZDHHC20
SUSD1	4.86627e-65	0.883357	0.356	0.246	1.52548e-60	STB-1	SUSD1
RBPJ	4.96665e-65	0.690101	0.527	0.433	1.55695e-60	STB-1	RBPJ
WDR45B	5.26452e-65	0.668621	0.586	0.492	1.65032e-60	STB-1	WDR45B
RILPL1	5.7497e-65	1.0855	0.284	0.18	1.80241e-60	STB-1	RILPL1
WWTR1	6.21496e-65	0.430668	0.643	0.531	1.94826e-60	STB-1	WWTR1
CERT1	7.16474e-65	0.479188	0.699	0.639	2.246e-60	STB-1	CERT1
FBXO32	2.39052e-64	0.947733	0.372	0.259	7.49382e-60	STB-1	FBXO32
PIP4K2A	2.93913e-64	0.55036	0.706	0.627	9.2136e-60	STB-1	PIP4K2A
ANKUB1	3.60005e-64	0.684217	0.652	0.585	1.12854e-59	STB-1	ANKUB1
DLG1	6.2408e-64	0.536504	0.716	0.676	1.95637e-59	STB-1	DLG1
SHTN1	8.33778e-64	0.782521	0.485	0.387	2.61373e-59	STB-1	SHTN1
PTPN14	8.85378e-64	0.458035	0.703	0.63	2.77548e-59	STB-1	PTPN14
SLC35A3	1.50627e-63	0.558589	0.605	0.523	4.72186e-59	STB-1	SLC35A3
NUTM2B-AS1	1.61869e-63	0.595488	0.57	0.479	5.07428e-59	STB-1	NUTM2B-AS1
ANXA2	2.3802e-63	0.366606	0.888	0.866	7.46144e-59	STB-1	ANXA2
AL365436.2	9.59291e-63	0.842958	0.409	0.304	3.00718e-58	STB-1	AL365436.2
GNPTG	1.05617e-62	0.70745	0.491	0.387	3.31089e-58	STB-1	GNPTG
URI1	1.83898e-62	0.464388	0.716	0.666	5.76483e-58	STB-1	URI1
YTHDC1	2.6429e-62	0.433636	0.789	0.741	8.28496e-58	STB-1	YTHDC1
EPB41L5	3.15272e-62	0.630165	0.596	0.524	9.88315e-58	STB-1	EPB41L5
SPPL2A	6.78649e-62	0.401872	0.768	0.737	2.12743e-57	STB-1	SPPL2A
SH2D4A	7.13092e-62	0.641332	0.537	0.434	2.2354e-57	STB-1	SH2D4A
DENR	8.32687e-62	0.541053	0.658	0.589	2.61031e-57	STB-1	DENR
CD55	8.36773e-62	0.39899	0.864	0.845	2.62312e-57	STB-1	CD55
PIK3R1	1.22246e-61	0.5477	0.75	0.698	3.83215e-57	STB-1	PIK3R1
DOCK9	1.4463e-61	0.488008	0.763	0.699	4.53387e-57	STB-1	DOCK9
ARL8B	1.49212e-61	0.300729	0.936	0.93	4.67748e-57	STB-1	ARL8B
CD2AP	2.37755e-61	0.569907	0.639	0.576	7.45314e-57	STB-1	CD2AP
AC023424.3	3.50944e-61	0.595399	0.743	0.696	1.10014e-56	STB-1	AC023424.3
KIAA1522	4.75127e-61	1.06524	0.25	0.153	1.48943e-56	STB-1	KIAA1522
HECTD1	5.30336e-61	0.43019	0.798	0.761	1.6625e-56	STB-1	HECTD1
LINC01876	6.0261e-61	1.06014	0.505	0.423	1.88906e-56	STB-1	LINC01876
UBE2K	7.98211e-61	0.273551	0.922	0.917	2.50223e-56	STB-1	UBE2K
LATS2	1.08154e-60	0.584309	0.593	0.499	3.39041e-56	STB-1	LATS2
ZNF525	1.24588e-60	0.655123	0.529	0.427	3.90559e-56	STB-1	ZNF525
VAPA	1.56565e-60	0.363235	0.817	0.786	4.90799e-56	STB-1	VAPA
CDK13	3.57872e-60	0.33351	0.861	0.852	1.12186e-55	STB-1	CDK13
OSBPL10	3.99276e-60	0.671575	0.686	0.631	1.25165e-55	STB-1	OSBPL10
SYT1	4.76619e-60	0.771833	0.498	0.402	1.49411e-55	STB-1	SYT1
MYH10	4.80872e-60	0.739989	0.492	0.399	1.50744e-55	STB-1	MYH10
SPOPL	1.00135e-59	0.609207	0.529	0.435	3.13902e-55	STB-1	SPOPL
SIPA1L3	1.58084e-59	0.77768	0.391	0.288	4.95563e-55	STB-1	SIPA1L3
RDH13	2.42928e-59	0.412433	0.883	0.845	7.61532e-55	STB-1	RDH13
NPC1	2.51415e-59	0.699417	0.598	0.513	7.88137e-55	STB-1	NPC1
SNX13	2.85313e-59	0.318176	0.855	0.826	8.944e-55	STB-1	SNX13
HIC2	2.91029e-59	0.810498	0.396	0.288	9.12317e-55	STB-1	HIC2
KDM1A	8.39312e-59	0.860112	0.338	0.236	2.63107e-54	STB-1	KDM1A
CD46	1.81723e-58	0.257613	0.965	0.965	5.69666e-54	STB-1	CD46
NRP1	4.1556e-58	1.04967	0.332	0.233	1.3027e-53	STB-1	NRP1
SERPINB9	5.8551e-58	0.439196	0.617	0.517	1.83546e-53	STB-1	SERPINB9
ZNF431	1.86386e-57	0.855928	0.374	0.275	5.84284e-53	STB-1	ZNF431
MFSD14C	2.84938e-57	0.495033	0.646	0.582	8.93223e-53	STB-1	MFSD14C
LINC01004	2.8798e-57	0.394589	0.927	0.934	9.0276e-53	STB-1	LINC01004
JPT2	2.90082e-57	0.305232	0.931	0.906	9.0935e-53	STB-1	JPT2
BMPR1A	4.94568e-57	0.72042	0.426	0.325	1.55037e-52	STB-1	BMPR1A
ZNF148	5.6033e-57	0.318107	0.825	0.809	1.75652e-52	STB-1	ZNF148
MAP3K1	1.09406e-56	0.782993	0.371	0.27	3.42965e-52	STB-1	MAP3K1
EPS15	1.99985e-56	0.462621	0.709	0.667	6.26913e-52	STB-1	EPS15
CCNYL1	2.08666e-56	1.00225	0.337	0.239	6.54126e-52	STB-1	CCNYL1
UBE2E2	3.4259e-56	0.371696	0.89	0.877	1.07395e-51	STB-1	UBE2E2
CORO2A	6.11978e-56	0.666172	0.509	0.411	1.91843e-51	STB-1	CORO2A
RNMT	6.61402e-56	0.39459	0.85	0.827	2.07336e-51	STB-1	RNMT
PCNX4	6.65851e-56	0.624654	0.52	0.429	2.08731e-51	STB-1	PCNX4
CTIF	6.75186e-56	0.768853	0.35	0.245	2.11657e-51	STB-1	CTIF
INF2	7.27378e-56	0.932772	0.325	0.225	2.28018e-51	STB-1	INF2
DNAJC21	1.37089e-55	0.452233	0.711	0.655	4.29747e-51	STB-1	DNAJC21
DAZAP2	1.75468e-55	0.426109	0.725	0.661	5.50058e-51	STB-1	DAZAP2
ADAM32	2.12476e-55	0.84667	0.363	0.259	6.66069e-51	STB-1	ADAM32
PPP2R3A	2.46922e-55	0.601486	0.689	0.631	7.7405e-51	STB-1	PPP2R3A
PSMG4	2.65247e-55	1.04064	0.285	0.191	8.31497e-51	STB-1	PSMG4
SOCS6	4.00689e-55	0.446472	0.732	0.678	1.25608e-50	STB-1	SOCS6
ACAP2	4.24608e-55	0.477579	0.707	0.661	1.33106e-50	STB-1	ACAP2
TTC19	4.5781e-55	0.428876	0.734	0.683	1.43514e-50	STB-1	TTC19
OTUD7B	6.83044e-55	0.686565	0.443	0.347	2.14121e-50	STB-1	OTUD7B
PPP6R3	8.45728e-55	0.256439	0.939	0.938	2.65119e-50	STB-1	PPP6R3
FAM151B	9.43876e-55	0.625263	0.507	0.415	2.95886e-50	STB-1	FAM151B
GRB2	9.71576e-55	0.404302	0.763	0.724	3.0457e-50	STB-1	GRB2
GSK3B	2.64051e-54	0.3525	0.937	0.935	8.27748e-50	STB-1	GSK3B
PLEKHA8	3.11494e-54	0.669902	0.475	0.381	9.76472e-50	STB-1	PLEKHA8
ELK4	3.42307e-54	0.764428	0.332	0.232	1.07306e-49	STB-1	ELK4
SERTAD2	5.25408e-54	0.652038	0.548	0.464	1.64705e-49	STB-1	SERTAD2
BACH1	8.53657e-54	0.344766	0.907	0.895	2.67604e-49	STB-1	BACH1
AC104041.1	1.26198e-53	0.605869	0.69	0.651	3.95606e-49	STB-1	AC104041.1
PUM1	1.72588e-53	0.250402	0.919	0.915	5.41029e-49	STB-1	PUM1
PTN	1.85856e-53	0.79165	0.468	0.378	5.82623e-49	STB-1	PTN
SLC7A6OS	1.97873e-53	0.593828	0.47	0.364	6.20292e-49	STB-1	SLC7A6OS
AL807742.1	1.99414e-53	0.659143	0.508	0.415	6.25124e-49	STB-1	AL807742.1
DOCK5	3.16089e-53	0.597161	0.581	0.492	9.90876e-49	STB-1	DOCK5
CMYA5	4.47963e-53	0.685753	0.542	0.457	1.40428e-48	STB-1	CMYA5
AL035446.2	5.19382e-53	0.486933	0.89	0.894	1.62816e-48	STB-1	AL035446.2
KSR1	5.57499e-53	0.885759	0.312	0.218	1.74765e-48	STB-1	KSR1
PATJ	6.63874e-53	1.16992	0.307	0.216	2.08111e-48	STB-1	PATJ
CREBRF	7.14336e-53	0.522566	0.67	0.593	2.2393e-48	STB-1	CREBRF
ARRB1	8.78477e-53	0.469893	0.738	0.684	2.75385e-48	STB-1	ARRB1
FTH1	1.17483e-52	0.497661	0.924	0.913	3.68286e-48	STB-1	FTH1
PCNP	1.29795e-52	0.389606	0.793	0.751	4.06881e-48	STB-1	PCNP
ADAM17	1.29815e-52	0.390787	0.758	0.718	4.06944e-48	STB-1	ADAM17
LRRC8D	1.55973e-52	0.495346	0.734	0.68	4.88945e-48	STB-1	LRRC8D
RNF217	2.65986e-52	0.868609	0.311	0.216	8.33812e-48	STB-1	RNF217
RBM5	2.84742e-52	0.426854	0.687	0.627	8.92609e-48	STB-1	RBM5
CTNNB1	3.32118e-52	0.432677	0.787	0.758	1.04112e-47	STB-1	CTNNB1
SNRNP48	3.43791e-52	0.825368	0.3	0.204	1.07772e-47	STB-1	SNRNP48
MAPK6	3.86255e-52	0.393111	0.765	0.718	1.21083e-47	STB-1	MAPK6
HNRNPU	4.51894e-52	0.267113	0.929	0.917	1.4166e-47	STB-1	HNRNPU
HELZ	7.77777e-52	0.671528	0.537	0.462	2.43818e-47	STB-1	HELZ
PPP4R3B	9.73843e-52	0.331753	0.794	0.758	3.0528e-47	STB-1	PPP4R3B
TMEM154	9.818e-52	1.12777	0.336	0.249	3.07775e-47	STB-1	TMEM154
COP1	1.12163e-51	0.337542	0.837	0.819	3.5161e-47	STB-1	COP1
PHKA2	1.15407e-51	0.848183	0.444	0.355	3.61779e-47	STB-1	PHKA2
AC079226.2	2.19126e-51	0.98982	0.256	0.166	6.86916e-47	STB-1	AC079226.2
C18orf25	2.32342e-51	0.563266	0.565	0.488	7.28347e-47	STB-1	C18orf25
ZKSCAN1	3.36317e-51	0.435252	0.666	0.604	1.05429e-46	STB-1	ZKSCAN1
ILRUN	3.7209e-51	0.380517	0.771	0.736	1.16643e-46	STB-1	ILRUN
ZNF761	5.37354e-51	0.638015	0.444	0.343	1.6845e-46	STB-1	ZNF761
SH3D19	6.04175e-51	0.447326	0.659	0.588	1.89397e-46	STB-1	SH3D19
CDC42EP3	6.19656e-51	0.931822	0.32	0.228	1.9425e-46	STB-1	CDC42EP3
DHX35	6.19979e-51	0.769126	0.403	0.305	1.94351e-46	STB-1	DHX35
PCM1	1.08262e-50	0.421697	0.738	0.687	3.39379e-46	STB-1	PCM1
FCHO2	1.26004e-50	0.401553	0.737	0.699	3.94997e-46	STB-1	FCHO2
SPIDR	1.32322e-50	0.617095	0.581	0.511	4.14802e-46	STB-1	SPIDR
KANTR	1.34076e-50	0.575812	0.498	0.402	4.20303e-46	STB-1	KANTR
ACTR6	2.04924e-50	0.423827	0.718	0.673	6.42395e-46	STB-1	ACTR6
TPD52	2.23438e-50	0.268671	0.968	0.96	7.00434e-46	STB-1	TPD52
UPF2	6.36163e-50	0.340503	0.807	0.775	1.99424e-45	STB-1	UPF2
RAB10	7.18288e-50	0.339909	0.818	0.793	2.25169e-45	STB-1	RAB10
FN1	8.22383e-50	0.992592	0.596	0.531	2.578e-45	STB-1	FN1
RSRC1	1.08734e-49	0.501146	0.648	0.592	3.40858e-45	STB-1	RSRC1
VPS41	2.07723e-49	0.326771	0.83	0.806	6.51171e-45	STB-1	VPS41
PNISR	2.72397e-49	0.361803	0.852	0.849	8.53909e-45	STB-1	PNISR
LRRFIP1	2.98702e-49	0.845614	0.35	0.258	9.36372e-45	STB-1	LRRFIP1
SUZ12	3.19367e-49	0.3293	0.802	0.773	1.00115e-44	STB-1	SUZ12
ZNF611	3.44333e-49	0.329356	0.888	0.846	1.07942e-44	STB-1	ZNF611
TNPO3	5.10466e-49	0.433411	0.667	0.614	1.60021e-44	STB-1	TNPO3
NCOR1	9.16174e-49	0.357062	0.808	0.788	2.87202e-44	STB-1	NCOR1
ANKRD12	1.0658e-48	0.327358	0.894	0.89	3.34107e-44	STB-1	ANKRD12
PDCD4	1.20224e-48	0.490357	0.709	0.645	3.76877e-44	STB-1	PDCD4
TM7SF3	1.57843e-48	0.777973	0.408	0.318	4.94807e-44	STB-1	TM7SF3
ARID3B	1.61133e-48	0.395855	0.813	0.776	5.05121e-44	STB-1	ARID3B
TSC22D2	1.84483e-48	0.266542	0.907	0.889	5.78316e-44	STB-1	TSC22D2
FOXJ2	2.17773e-48	0.947006	0.262	0.173	6.82675e-44	STB-1	FOXJ2
MMP24	2.46434e-48	0.599478	0.535	0.451	7.72521e-44	STB-1	MMP24
UBR2	2.88628e-48	0.407427	0.738	0.704	9.0479e-44	STB-1	UBR2
NOD1	3.89699e-48	0.730427	0.338	0.243	1.22163e-43	STB-1	NOD1
RFK	4.06047e-48	0.431386	0.684	0.608	1.27287e-43	STB-1	RFK
NFE2L3	7.07585e-48	0.505787	0.649	0.589	2.21814e-43	STB-1	NFE2L3
PFKP	8.49169e-48	0.541914	0.647	0.568	2.66197e-43	STB-1	PFKP
NUTM2A-AS1	8.8673e-48	0.50803	0.547	0.461	2.77972e-43	STB-1	NUTM2A-AS1
SP140L	9.28195e-48	0.551613	0.505	0.419	2.9097e-43	STB-1	SP140L
SLC7A6	1.13291e-47	0.608471	0.477	0.382	3.55145e-43	STB-1	SLC7A6
FBXO22	1.14253e-47	0.480384	0.629	0.565	3.58162e-43	STB-1	FBXO22
AKAP9	1.27492e-47	0.270678	0.924	0.92	3.99662e-43	STB-1	AKAP9
SLC16A1	1.46195e-47	0.446464	0.656	0.59	4.58293e-43	STB-1	SLC16A1
STRN	1.74459e-47	0.378912	0.75	0.714	5.46893e-43	STB-1	STRN
UBXN7	2.02113e-47	0.429564	0.647	0.582	6.33583e-43	STB-1	UBXN7
CCSAP	2.32681e-47	0.253342	0.945	0.924	7.2941e-43	STB-1	CCSAP
RNF43	3.25951e-47	0.959845	0.251	0.166	1.02179e-42	STB-1	RNF43
MED1	4.12497e-47	0.485091	0.594	0.521	1.29309e-42	STB-1	MED1
GPR146	4.52213e-47	0.638991	0.477	0.379	1.4176e-42	STB-1	GPR146
KCTD20	4.67447e-47	0.569181	0.479	0.385	1.46535e-42	STB-1	KCTD20
AL117329.1	5.38307e-47	1.24217	0.348	0.267	1.68748e-42	STB-1	AL117329.1
UBE2E1	9.32555e-47	0.519971	0.603	0.536	2.92337e-42	STB-1	UBE2E1
SPG11	9.97871e-47	0.552441	0.571	0.504	3.12813e-42	STB-1	SPG11
MYO9B	1.09894e-46	0.390025	0.73	0.684	3.44497e-42	STB-1	MYO9B
SMARCC1	1.25361e-46	0.331038	0.821	0.817	3.92981e-42	STB-1	SMARCC1
CDC42SE2	1.33337e-46	0.314259	0.788	0.757	4.17984e-42	STB-1	CDC42SE2
STX12	1.50859e-46	0.369366	0.734	0.689	4.72913e-42	STB-1	STX12
RAB11FIP4	1.60311e-46	0.824359	0.337	0.25	5.02542e-42	STB-1	RAB11FIP4
CTBP2	1.68318e-46	0.37725	0.848	0.818	5.27643e-42	STB-1	CTBP2
USP47	1.82153e-46	0.271096	0.867	0.858	5.71012e-42	STB-1	USP47
AKAP10	1.87605e-46	0.437544	0.675	0.625	5.88104e-42	STB-1	AKAP10
UBE4A	1.96214e-46	0.476113	0.617	0.544	6.15091e-42	STB-1	UBE4A
KANSL1	2.59942e-46	0.290003	0.874	0.874	8.14867e-42	STB-1	KANSL1
GRIA3	2.60338e-46	0.951031	0.296	0.208	8.16109e-42	STB-1	GRIA3
CRY2	2.79392e-46	0.855166	0.272	0.184	8.75838e-42	STB-1	CRY2
NFE2L2	3.6567e-46	0.357165	0.779	0.728	1.1463e-41	STB-1	NFE2L2
F11R	4.11339e-46	0.52915	0.579	0.502	1.28947e-41	STB-1	F11R
UBE2G1	4.31616e-46	0.326482	0.841	0.826	1.35303e-41	STB-1	UBE2G1
ZSWIM7	5.13923e-46	0.682745	0.418	0.328	1.61105e-41	STB-1	ZSWIM7
JADE3	5.75916e-46	0.575391	0.487	0.397	1.80538e-41	STB-1	JADE3
AC007319.1	6.35597e-46	0.397443	0.941	0.947	1.99247e-41	STB-1	AC007319.1
ITSN2	7.03524e-46	0.607205	0.472	0.39	2.20541e-41	STB-1	ITSN2
NRIP1	7.32961e-46	0.510514	0.6	0.528	2.29769e-41	STB-1	NRIP1
MAPK8	7.51578e-46	0.600217	0.399	0.308	2.35605e-41	STB-1	MAPK8
CNOT1	8.09594e-46	0.289681	0.827	0.8	2.53791e-41	STB-1	CNOT1
PLEKHF2	8.91207e-46	0.731006	0.34	0.25	2.79375e-41	STB-1	PLEKHF2
TLE1	2.0602e-45	0.678981	0.432	0.346	6.4583e-41	STB-1	TLE1
KDM5B	3.1927e-45	0.319132	0.813	0.796	1.00085e-40	STB-1	KDM5B
WEE1	3.22659e-45	0.401304	0.756	0.712	1.01147e-40	STB-1	WEE1
PALLD	3.59804e-45	0.684615	0.318	0.229	1.12791e-40	STB-1	PALLD
C1GALT1	4.74957e-45	0.448154	0.699	0.652	1.48889e-40	STB-1	C1GALT1
ZNF888	4.90194e-45	0.670325	0.365	0.274	1.53666e-40	STB-1	ZNF888
AC007384.1	6.96228e-45	0.442138	0.786	0.754	2.18254e-40	STB-1	AC007384.1
HECA	7.53635e-45	0.650178	0.406	0.316	2.36249e-40	STB-1	HECA
CDKN1C	7.77469e-45	0.663964	0.774	0.742	2.43721e-40	STB-1	CDKN1C
ADAMTS1	1.12029e-44	0.841118	0.436	0.353	3.5119e-40	STB-1	ADAMTS1
OAT	1.64372e-44	1.02464	0.272	0.19	5.15274e-40	STB-1	OAT
SLC6A8	1.81064e-44	0.49404	0.691	0.619	5.676e-40	STB-1	SLC6A8
CUL1	2.20885e-44	0.359584	0.728	0.693	6.9243e-40	STB-1	CUL1
COX19	4.0114e-44	0.464441	0.593	0.516	1.25749e-39	STB-1	COX19
ZNF680	4.71135e-44	0.837536	0.295	0.21	1.47691e-39	STB-1	ZNF680
TET2	6.04819e-44	0.32025	0.805	0.773	1.89599e-39	STB-1	TET2
ARPC2	1.05873e-43	0.315094	0.822	0.802	3.3189e-39	STB-1	ARPC2
UBQLN1	1.20824e-43	0.288412	0.877	0.862	3.78758e-39	STB-1	UBQLN1
TPD52L1	1.73365e-43	0.74932	0.32	0.23	5.43466e-39	STB-1	TPD52L1
DNMT1	1.81913e-43	0.580694	0.501	0.42	5.7026e-39	STB-1	DNMT1
WWC2	2.42622e-43	0.767899	0.372	0.287	7.60571e-39	STB-1	WWC2
ZNF823	2.51059e-43	0.575074	0.513	0.431	7.8702e-39	STB-1	ZNF823
FAM83D	2.52027e-43	0.387973	0.57	0.467	7.90054e-39	STB-1	FAM83D
ARGLU1	2.60812e-43	0.2766	0.908	0.908	8.17595e-39	STB-1	ARGLU1
BRD4	3.12001e-43	0.254642	0.901	0.892	9.78062e-39	STB-1	BRD4
PDSS2	4.65874e-43	0.609307	0.544	0.482	1.46042e-38	STB-1	PDSS2
DDX3X	4.95091e-43	0.312553	0.851	0.824	1.55201e-38	STB-1	DDX3X
MCCC1	5.13194e-43	0.599774	0.46	0.374	1.60876e-38	STB-1	MCCC1
PPM1A	8.30385e-43	0.454061	0.605	0.538	2.60309e-38	STB-1	PPM1A
LAMP2	9.55893e-43	0.323055	0.826	0.791	2.99653e-38	STB-1	LAMP2
LPIN1	1.1981e-42	0.615679	0.399	0.308	3.75581e-38	STB-1	LPIN1
WDFY3	1.25334e-42	0.274854	0.88	0.88	3.92898e-38	STB-1	WDFY3
NDRG1	1.29717e-42	0.908523	0.507	0.437	4.06635e-38	STB-1	NDRG1
SORT1	1.31842e-42	0.605088	0.502	0.425	4.13299e-38	STB-1	SORT1
SIGLEC6	1.46308e-42	0.421779	0.809	0.771	4.58647e-38	STB-1	SIGLEC6
CCNK	1.51493e-42	0.550605	0.509	0.427	4.74902e-38	STB-1	CCNK
NLRP2	1.72205e-42	0.491451	0.583	0.509	5.3983e-38	STB-1	NLRP2
SRSF7	2.12055e-42	0.323686	0.843	0.818	6.64749e-38	STB-1	SRSF7
STXBP5	3.49835e-42	0.657301	0.402	0.316	1.09666e-37	STB-1	STXBP5
IQSEC1	3.81243e-42	0.359697	0.706	0.645	1.19512e-37	STB-1	IQSEC1
CPNE8	4.44283e-42	0.939383	0.26	0.181	1.39274e-37	STB-1	CPNE8
VPS4B	7.33198e-42	0.356974	0.744	0.7	2.29843e-37	STB-1	VPS4B
C3orf52	7.50408e-42	0.69413	0.329	0.24	2.35238e-37	STB-1	C3orf52
GALNT11	7.70161e-42	0.456294	0.619	0.546	2.4143e-37	STB-1	GALNT11
MYSM1	8.8857e-42	0.381236	0.702	0.656	2.78549e-37	STB-1	MYSM1
DIDO1	9.22965e-42	0.332561	0.742	0.708	2.89331e-37	STB-1	DIDO1
FBXW4	9.30095e-42	0.711649	0.41	0.332	2.91566e-37	STB-1	FBXW4
SMC4	1.43407e-41	0.72621	0.378	0.295	4.49554e-37	STB-1	SMC4
ERMP1	3.5011e-41	0.706997	0.338	0.253	1.09752e-36	STB-1	ERMP1
CYFIP1	4.03533e-41	0.53465	0.524	0.454	1.265e-36	STB-1	CYFIP1
AL365295.1	4.52371e-41	1.02548	0.253	0.174	1.41809e-36	STB-1	AL365295.1
TRAPPC8	5.03053e-41	0.337689	0.752	0.726	1.57697e-36	STB-1	TRAPPC8
GPATCH2L	5.72858e-41	0.468767	0.604	0.547	1.79579e-36	STB-1	GPATCH2L
BICRAL	6.37513e-41	0.767937	0.341	0.257	1.99848e-36	STB-1	BICRAL
AC005355.1	9.81236e-41	0.697106	0.548	0.473	3.07598e-36	STB-1	AC005355.1
CSF2RA	9.94923e-41	0.401988	0.805	0.779	3.11888e-36	STB-1	CSF2RA
KLF5	1.57985e-40	0.646758	0.523	0.455	4.9525e-36	STB-1	KLF5
FMR1	1.85705e-40	0.389553	0.701	0.649	5.82147e-36	STB-1	FMR1
FAM210A	1.88878e-40	0.518772	0.525	0.443	5.92093e-36	STB-1	FAM210A
ATP2B4	2.36071e-40	0.419021	0.944	0.935	7.40034e-36	STB-1	ATP2B4
ARHGAP12	3.27116e-40	0.417423	0.692	0.646	1.02544e-35	STB-1	ARHGAP12
RTTN	4.17245e-40	0.485233	0.542	0.472	1.30798e-35	STB-1	RTTN
MMP24OS	5.7957e-40	0.557742	0.531	0.464	1.81684e-35	STB-1	MMP24OS
AC097376.3	6.42127e-40	0.427235	0.66	0.611	2.01294e-35	STB-1	AC097376.3
PKN2	6.48157e-40	0.51215	0.701	0.693	2.03184e-35	STB-1	PKN2
ORC2	8.28071e-40	0.32871	0.782	0.76	2.59584e-35	STB-1	ORC2
PTAR1	8.52348e-40	0.590803	0.465	0.39	2.67194e-35	STB-1	PTAR1
RAPGEF6	9.27178e-40	0.324359	0.829	0.834	2.90652e-35	STB-1	RAPGEF6
GCC2	1.47822e-39	0.518364	0.555	0.49	4.63392e-35	STB-1	GCC2
TMEM161B-AS1	1.48575e-39	0.473168	0.591	0.529	4.65753e-35	STB-1	TMEM161B-AS1
RNF24	1.49403e-39	0.656163	0.334	0.249	4.68349e-35	STB-1	RNF24
ZNF701	2.05546e-39	0.487372	0.576	0.507	6.44347e-35	STB-1	ZNF701
KYAT3	2.22071e-39	0.459755	0.601	0.546	6.96147e-35	STB-1	KYAT3
FRS2	2.2289e-39	0.394649	0.67	0.618	6.98716e-35	STB-1	FRS2
DSG2	2.30923e-39	0.496335	0.584	0.516	7.23896e-35	STB-1	DSG2
LEPROTL1	2.56245e-39	0.675381	0.387	0.306	8.03276e-35	STB-1	LEPROTL1
VPS35	3.11282e-39	0.470436	0.581	0.515	9.75806e-35	STB-1	VPS35
AL031428.1	3.8115e-39	0.919876	0.252	0.176	1.19483e-34	STB-1	AL031428.1
ATRX	4.58033e-39	0.366595	0.751	0.729	1.43584e-34	STB-1	ATRX
MTMR3	5.43883e-39	0.317779	0.777	0.754	1.70496e-34	STB-1	MTMR3
NCK2	5.46955e-39	0.471691	0.585	0.521	1.71459e-34	STB-1	NCK2
STX7	5.85923e-39	0.420636	0.665	0.619	1.83675e-34	STB-1	STX7
PHTF2	7.27028e-39	0.496882	0.531	0.457	2.27909e-34	STB-1	PHTF2
CYB5R4	8.47133e-39	0.508865	0.512	0.439	2.65559e-34	STB-1	CYB5R4
TTC17	9.79639e-39	0.422051	0.694	0.665	3.07097e-34	STB-1	TTC17
SF3B1	1.37324e-38	0.2798	0.846	0.832	4.30483e-34	STB-1	SF3B1
GXYLT1	1.41526e-38	0.392833	0.612	0.548	4.43654e-34	STB-1	GXYLT1
ARFGEF1	1.44194e-38	0.336296	0.764	0.751	4.52021e-34	STB-1	ARFGEF1
MYO1D	1.76219e-38	0.328749	0.829	0.816	5.52413e-34	STB-1	MYO1D
KLF3	2.08151e-38	0.706548	0.457	0.387	6.52512e-34	STB-1	KLF3
MTR	2.23734e-38	0.685604	0.444	0.371	7.0136e-34	STB-1	MTR
RAC1	3.49214e-38	0.342728	0.779	0.751	1.09472e-33	STB-1	RAC1
ZNF28	3.71442e-38	0.554292	0.454	0.371	1.1644e-33	STB-1	ZNF28
SRSF3	4.02722e-38	0.299179	0.815	0.779	1.26245e-33	STB-1	SRSF3
SLK	4.10606e-38	0.420368	0.66	0.607	1.28717e-33	STB-1	SLK
RYK	4.11243e-38	0.580384	0.493	0.425	1.28917e-33	STB-1	RYK
CDK12	4.44093e-38	0.27201	0.822	0.806	1.39214e-33	STB-1	CDK12
KIAA0556	4.82485e-38	0.647372	0.355	0.272	1.5125e-33	STB-1	KIAA0556
TAF3	4.8333e-38	0.339003	0.796	0.773	1.51514e-33	STB-1	TAF3
SRSF2	4.95969e-38	0.39955	0.68	0.633	1.55476e-33	STB-1	SRSF2
PRH1	5.43379e-38	0.810014	0.304	0.225	1.70338e-33	STB-1	PRH1
PFKFB4	5.49635e-38	0.60126	0.508	0.434	1.723e-33	STB-1	PFKFB4
KTN1	5.94067e-38	0.333451	0.769	0.74	1.86228e-33	STB-1	KTN1
SMAGP	5.95201e-38	0.650649	0.37	0.288	1.86584e-33	STB-1	SMAGP
NCOR2	6.33533e-38	0.428993	0.534	0.446	1.986e-33	STB-1	NCOR2
FILNC1	7.70459e-38	0.705466	0.362	0.277	2.41523e-33	STB-1	FILNC1
RPA1	8.47111e-38	0.553371	0.386	0.3	2.65552e-33	STB-1	RPA1
HAUS6	1.00382e-37	0.628137	0.402	0.318	3.14679e-33	STB-1	HAUS6
PTGES	1.05338e-37	0.671361	0.422	0.343	3.30213e-33	STB-1	PTGES
CCNY	1.32038e-37	0.348869	0.874	0.857	4.13914e-33	STB-1	CCNY
DAB2IP	1.32769e-37	0.484971	0.508	0.425	4.16205e-33	STB-1	DAB2IP
NUP54	1.61263e-37	0.428048	0.609	0.551	5.05527e-33	STB-1	NUP54
RAB11FIP3	1.85286e-37	0.778625	0.27	0.193	5.80835e-33	STB-1	RAB11FIP3
CMTM4	1.93748e-37	0.569947	0.462	0.388	6.07362e-33	STB-1	CMTM4
ROCK2	2.38789e-37	0.390695	0.658	0.614	7.48557e-33	STB-1	ROCK2
UTRN	2.40994e-37	0.892231	0.282	0.205	7.55469e-33	STB-1	UTRN
ZFX	2.972e-37	0.549051	0.461	0.383	9.31661e-33	STB-1	ZFX
AC005920.2	3.15604e-37	0.799715	0.341	0.262	9.89356e-33	STB-1	AC005920.2
ZFAND5	3.99111e-37	0.446724	0.57	0.503	1.25113e-32	STB-1	ZFAND5
TOPBP1	5.06782e-37	0.640026	0.349	0.269	1.58866e-32	STB-1	TOPBP1
ZNF721	5.52548e-37	0.41119	0.641	0.6	1.73213e-32	STB-1	ZNF721
MIR193BHG	5.55109e-37	0.40229	0.743	0.685	1.74016e-32	STB-1	MIR193BHG
ZNF440	5.69922e-37	0.522748	0.523	0.456	1.78659e-32	STB-1	ZNF440
NUMB	8.36943e-37	0.348658	0.753	0.736	2.62365e-32	STB-1	NUMB
G3BP1	1.12747e-36	0.399213	0.629	0.573	3.53439e-32	STB-1	G3BP1
SLC35E3	1.15627e-36	0.683759	0.399	0.32	3.62467e-32	STB-1	SLC35E3
TRAM2	1.19552e-36	0.307925	0.694	0.614	3.74772e-32	STB-1	TRAM2
GRAMD2A	1.28093e-36	0.737479	0.373	0.297	4.01546e-32	STB-1	GRAMD2A
RBM33	1.55542e-36	0.256144	0.853	0.851	4.87594e-32	STB-1	RBM33
BMP7	1.56726e-36	0.687516	0.407	0.33	4.91305e-32	STB-1	BMP7
AC092598.1	1.7686e-36	0.561526	0.368	0.283	5.54421e-32	STB-1	AC092598.1
CALD1	1.82245e-36	0.539384	0.596	0.545	5.71303e-32	STB-1	CALD1
TM2D1	1.91786e-36	0.537647	0.455	0.382	6.01212e-32	STB-1	TM2D1
UIMC1	2.33158e-36	0.644829	0.334	0.254	7.30902e-32	STB-1	UIMC1
AC060809.1	2.72723e-36	0.669804	0.401	0.324	8.54932e-32	STB-1	AC060809.1
MGST3	2.77004e-36	0.281878	0.827	0.806	8.68352e-32	STB-1	MGST3
SGMS1	3.45132e-36	0.690268	0.412	0.34	1.08192e-31	STB-1	SGMS1
HOMER1	3.6792e-36	0.657526	0.357	0.277	1.15336e-31	STB-1	HOMER1
KLHL24	4.20104e-36	0.415751	0.638	0.564	1.31694e-31	STB-1	KLHL24
BLZF1	7.804e-36	0.680286	0.29	0.212	2.4464e-31	STB-1	BLZF1
ADNP	7.86252e-36	0.299512	0.779	0.763	2.46474e-31	STB-1	ADNP
GTF3C2	8.84036e-36	0.413706	0.58	0.523	2.77128e-31	STB-1	GTF3C2
TBC1D2	9.22337e-36	0.543776	0.562	0.498	2.89134e-31	STB-1	TBC1D2
CALM2	9.92234e-36	0.605329	0.56	0.5	3.11045e-31	STB-1	CALM2
ATP2B1	1.00974e-35	0.643571	0.403	0.328	3.16533e-31	STB-1	ATP2B1
HIP1R	1.12358e-35	0.554702	0.398	0.319	3.52221e-31	STB-1	HIP1R
AC093821.1	1.35605e-35	0.572447	0.351	0.267	4.25094e-31	STB-1	AC093821.1
UPP1	1.82267e-35	0.449171	0.783	0.747	5.71369e-31	STB-1	UPP1
PIEZO1	2.06116e-35	0.720253	0.294	0.216	6.46132e-31	STB-1	PIEZO1
CCNI	2.07529e-35	0.512051	0.545	0.488	6.50562e-31	STB-1	CCNI
FIGN	2.12593e-35	0.333955	0.792	0.776	6.66438e-31	STB-1	FIGN
NKTR	2.44873e-35	0.349395	0.754	0.734	7.67629e-31	STB-1	NKTR
ZFAS1	2.81547e-35	0.388077	0.759	0.728	8.82594e-31	STB-1	ZFAS1
YME1L1	3.56303e-35	0.318686	0.795	0.77	1.11694e-30	STB-1	YME1L1
TAF4B	3.9579e-35	0.629215	0.393	0.317	1.24072e-30	STB-1	TAF4B
DCAF7	4.13253e-35	0.657182	0.314	0.236	1.29546e-30	STB-1	DCAF7
ERO1A	4.1658e-35	0.477175	0.649	0.586	1.30589e-30	STB-1	ERO1A
WASHC5	4.95541e-35	0.553993	0.524	0.457	1.55342e-30	STB-1	WASHC5
OXR1	5.13637e-35	0.446807	0.542	0.475	1.61015e-30	STB-1	OXR1
ANKLE2	5.23565e-35	0.356329	0.667	0.609	1.64127e-30	STB-1	ANKLE2
PTPRM	5.99176e-35	0.405787	0.656	0.596	1.8783e-30	STB-1	PTPRM
HECTD4	6.20714e-35	0.35671	0.732	0.718	1.94581e-30	STB-1	HECTD4
PHKB	7.27718e-35	0.469005	0.61	0.568	2.28125e-30	STB-1	PHKB
DRAM1	1.07861e-34	0.650795	0.395	0.322	3.38123e-30	STB-1	DRAM1
ETNK1	1.23687e-34	0.328717	0.76	0.75	3.87735e-30	STB-1	ETNK1
NARF	1.27781e-34	0.811991	0.277	0.2	4.00568e-30	STB-1	NARF
CNNM4	1.49156e-34	0.776138	0.286	0.211	4.67575e-30	STB-1	CNNM4
SSH1	2.61423e-34	0.624401	0.412	0.337	8.1951e-30	STB-1	SSH1
ALS2	3.0248e-34	0.756627	0.29	0.216	9.48215e-30	STB-1	ALS2
TUT7	3.13671e-34	0.25495	0.903	0.899	9.83296e-30	STB-1	TUT7
PWWP2A	3.89081e-34	0.80657	0.302	0.231	1.21969e-29	STB-1	PWWP2A
SPG7	4.36357e-34	0.372345	0.693	0.669	1.36789e-29	STB-1	SPG7
AC083870.1	4.6387e-34	0.660994	0.305	0.228	1.45414e-29	STB-1	AC083870.1
FNTA	5.19281e-34	0.323368	0.705	0.666	1.62784e-29	STB-1	FNTA
NDFIP1	5.69914e-34	0.364299	0.654	0.605	1.78657e-29	STB-1	NDFIP1
PANX1	6.16601e-34	0.591347	0.356	0.275	1.93292e-29	STB-1	PANX1
BPTF	6.77701e-34	0.402604	0.721	0.698	2.12446e-29	STB-1	BPTF
PTPN12	7.62081e-34	0.274647	0.82	0.798	2.38897e-29	STB-1	PTPN12
SCAMP2	8.5398e-34	0.481246	0.494	0.422	2.67706e-29	STB-1	SCAMP2
MTERF1	8.64455e-34	0.813394	0.279	0.207	2.70989e-29	STB-1	MTERF1
TIMP3	1.08762e-33	0.388268	0.759	0.732	3.40947e-29	STB-1	TIMP3
RHOU	1.09094e-33	0.796923	0.274	0.2	3.41989e-29	STB-1	RHOU
GAS2L3	1.30203e-33	0.752172	0.272	0.195	4.0816e-29	STB-1	GAS2L3
AHI1	1.42469e-33	0.400479	0.655	0.621	4.46611e-29	STB-1	AHI1
RAB20	1.47242e-33	0.6838	0.414	0.341	4.61574e-29	STB-1	RAB20
TTC14	2.21836e-33	0.543061	0.424	0.35	6.9541e-29	STB-1	TTC14
FDFT1	2.74058e-33	0.331906	0.765	0.725	8.59117e-29	STB-1	FDFT1
LINC01278	3.07526e-33	0.494493	0.514	0.444	9.64032e-29	STB-1	LINC01278
GLYR1	3.16405e-33	0.32307	0.705	0.668	9.91867e-29	STB-1	GLYR1
ZNF468	3.9709e-33	0.601098	0.383	0.303	1.2448e-28	STB-1	ZNF468
UBE4B	4.4244e-33	0.359201	0.731	0.713	1.38696e-28	STB-1	UBE4B
PDS5B	5.25587e-33	0.320248	0.721	0.683	1.64761e-28	STB-1	PDS5B
ACIN1	5.55095e-33	0.25718	0.828	0.819	1.74011e-28	STB-1	ACIN1
CHKB	6.00579e-33	0.613835	0.281	0.204	1.88269e-28	STB-1	CHKB
FADS1	6.27029e-33	0.564965	0.372	0.29	1.96561e-28	STB-1	FADS1
KIN	6.81131e-33	0.467211	0.511	0.439	2.13521e-28	STB-1	KIN
RP2	7.15241e-33	0.801767	0.252	0.18	2.24214e-28	STB-1	RP2
EHBP1	7.93017e-33	0.700266	0.308	0.236	2.48595e-28	STB-1	EHBP1
CDYL	1.28045e-32	0.343435	0.941	0.939	4.01395e-28	STB-1	CDYL
MRE11	1.42994e-32	0.566737	0.342	0.265	4.48256e-28	STB-1	MRE11
LIN54	1.46006e-32	0.588853	0.43	0.361	4.57698e-28	STB-1	LIN54
EXOC3	1.56564e-32	0.451831	0.44	0.361	4.90796e-28	STB-1	EXOC3
CTDSPL2	1.67268e-32	0.421357	0.625	0.583	5.24351e-28	STB-1	CTDSPL2
TAF7	1.76397e-32	0.389852	0.623	0.57	5.52968e-28	STB-1	TAF7
ANKIB1	2.08542e-32	0.297981	0.806	0.806	6.53738e-28	STB-1	ANKIB1
PSEN1	2.1376e-32	0.31812	0.768	0.747	6.70096e-28	STB-1	PSEN1
ATP6V1B2	2.18007e-32	0.617523	0.363	0.287	6.83409e-28	STB-1	ATP6V1B2
AC010789.1	2.40774e-32	0.637376	0.335	0.263	7.54778e-28	STB-1	AC010789.1
XPC	2.49481e-32	0.50379	0.503	0.44	7.82072e-28	STB-1	XPC
AF107885.2	2.58119e-32	0.762884	0.323	0.25	8.09152e-28	STB-1	AF107885.2
FBXL4	2.71411e-32	0.508485	0.52	0.463	8.50819e-28	STB-1	FBXL4
COMMD2	2.92271e-32	0.615894	0.378	0.304	9.16213e-28	STB-1	COMMD2
MAK	3.07475e-32	0.56161	0.453	0.384	9.63874e-28	STB-1	MAK
MAP4	3.20619e-32	0.341398	0.726	0.71	1.00508e-27	STB-1	MAP4
IDH2	3.21477e-32	0.391088	0.588	0.52	1.00777e-27	STB-1	IDH2
MKRN1	3.95812e-32	0.488342	0.438	0.362	1.24079e-27	STB-1	MKRN1
SNHG1	4.00977e-32	0.463226	0.53	0.462	1.25698e-27	STB-1	SNHG1
SRRM1	4.58088e-32	0.308652	0.854	0.834	1.43601e-27	STB-1	SRRM1
CEBPZ	5.09345e-32	0.400094	0.61	0.554	1.5967e-27	STB-1	CEBPZ
C1orf112	6.41948e-32	0.75661	0.255	0.184	2.01238e-27	STB-1	C1orf112
SEC24B	7.50615e-32	0.303834	0.723	0.69	2.35303e-27	STB-1	SEC24B
ZNF43	9.2988e-32	0.703817	0.26	0.19	2.91499e-27	STB-1	ZNF43
TRPM7	9.8094e-32	0.417848	0.713	0.709	3.07505e-27	STB-1	TRPM7
MRPS28	1.1565e-31	0.478989	0.681	0.646	3.6254e-27	STB-1	MRPS28
NUP98	1.16694e-31	0.328459	0.699	0.675	3.65812e-27	STB-1	NUP98
TTC1	1.25741e-31	0.368087	0.677	0.646	3.94173e-27	STB-1	TTC1
TAB2	1.34161e-31	0.322574	0.719	0.696	4.20569e-27	STB-1	TAB2
PSMB7	1.54818e-31	0.362084	0.649	0.604	4.85324e-27	STB-1	PSMB7
ABI1	2.52308e-31	0.288583	0.755	0.734	7.90936e-27	STB-1	ABI1
KIAA2026	2.61487e-31	0.433817	0.614	0.572	8.19709e-27	STB-1	KIAA2026
C9	2.91666e-31	0.279572	0.441	0.57	9.14316e-27	STB-1	C9
PPHLN1	3.15879e-31	0.494088	0.485	0.423	9.90216e-27	STB-1	PPHLN1
CCNT2-AS1	3.19062e-31	0.724263	0.316	0.245	1.00019e-26	STB-1	CCNT2-AS1
MPP7	3.25626e-31	0.329396	0.751	0.72	1.02077e-26	STB-1	MPP7
VPS8	3.56604e-31	0.428897	0.64	0.613	1.11788e-26	STB-1	VPS8
SGCE	4.12107e-31	0.639634	0.364	0.294	1.29187e-26	STB-1	SGCE
ASTN2	4.24202e-31	0.711494	0.441	0.377	1.32979e-26	STB-1	ASTN2
MIS18BP1	4.33063e-31	0.505864	0.475	0.41	1.35757e-26	STB-1	MIS18BP1
MINK1	4.79869e-31	0.41071	0.583	0.534	1.50429e-26	STB-1	MINK1
ZNF430	5.11783e-31	0.753916	0.266	0.196	1.60434e-26	STB-1	ZNF430
ATP5F1C	5.20686e-31	0.374534	0.606	0.557	1.63225e-26	STB-1	ATP5F1C
SDC4	5.44443e-31	0.509863	0.438	0.362	1.70672e-26	STB-1	SDC4
SNX29	5.56961e-31	0.446773	0.616	0.578	1.74596e-26	STB-1	SNX29
PPP2R5E	5.76927e-31	0.264556	0.868	0.877	1.80855e-26	STB-1	PPP2R5E
GARS-DT	6.32481e-31	0.725442	0.304	0.233	1.9827e-26	STB-1	GARS-DT
NCBP3	6.3991e-31	0.507578	0.41	0.335	2.00599e-26	STB-1	NCBP3
ZC3H14	6.58141e-31	0.355392	0.651	0.606	2.06314e-26	STB-1	ZC3H14
ZNF782	7.10089e-31	0.683282	0.293	0.222	2.22599e-26	STB-1	ZNF782
KANK1	7.16351e-31	0.630637	0.499	0.439	2.24562e-26	STB-1	KANK1
CDH1	8.23525e-31	0.466934	0.631	0.588	2.58158e-26	STB-1	CDH1
MTF2	8.61876e-31	0.399151	0.603	0.557	2.70181e-26	STB-1	MTF2
SIPA1L2	9.40288e-31	0.57506	0.437	0.373	2.94762e-26	STB-1	SIPA1L2
CNOT4	9.85187e-31	0.264141	0.805	0.796	3.08837e-26	STB-1	CNOT4
DNAJC2	1.05161e-30	0.488021	0.49	0.423	3.29659e-26	STB-1	DNAJC2
ROCK1	1.13015e-30	0.407443	0.578	0.534	3.5428e-26	STB-1	ROCK1
FZD6	1.16485e-30	0.651332	0.302	0.231	3.65157e-26	STB-1	FZD6
SMC5	1.26737e-30	0.276537	0.776	0.74	3.97294e-26	STB-1	SMC5
IREB2	1.2754e-30	0.385311	0.628	0.59	3.99812e-26	STB-1	IREB2
RRAS2	1.30166e-30	0.479645	0.588	0.543	4.08044e-26	STB-1	RRAS2
NR2C2	1.39819e-30	0.275836	0.804	0.79	4.38306e-26	STB-1	NR2C2
CGGBP1	1.6353e-30	0.36963	0.745	0.715	5.12633e-26	STB-1	CGGBP1
KIDINS220	1.91745e-30	0.576918	0.445	0.383	6.01083e-26	STB-1	KIDINS220
ARHGAP5	2.12351e-30	0.407017	0.624	0.588	6.65679e-26	STB-1	ARHGAP5
MAPK14	2.22081e-30	0.448726	0.532	0.476	6.9618e-26	STB-1	MAPK14
DEK	2.27473e-30	0.469783	0.463	0.397	7.13081e-26	STB-1	DEK
GNAI3	2.33048e-30	0.358394	0.652	0.604	7.30559e-26	STB-1	GNAI3
RSRC2	2.86944e-30	0.281621	0.768	0.738	8.99511e-26	STB-1	RSRC2
VPS37A	3.06104e-30	0.296957	0.727	0.696	9.59576e-26	STB-1	VPS37A
DMTF1	3.32866e-30	0.415657	0.59	0.542	1.04347e-25	STB-1	DMTF1
OFD1	4.04559e-30	0.495683	0.546	0.494	1.26821e-25	STB-1	OFD1
CWF19L2	4.12009e-30	0.50298	0.526	0.475	1.29157e-25	STB-1	CWF19L2
EIF5	4.22938e-30	0.26434	0.785	0.753	1.32583e-25	STB-1	EIF5
RABEP1	4.33446e-30	0.571517	0.475	0.419	1.35877e-25	STB-1	RABEP1
IGF2R	4.47237e-30	0.376154	0.662	0.62	1.402e-25	STB-1	IGF2R
CAMTA1	4.83794e-30	0.590785	0.541	0.492	1.5166e-25	STB-1	CAMTA1
AC027288.3	6.08923e-30	0.798372	0.373	0.305	1.90885e-25	STB-1	AC027288.3
NDUFAF6	6.71185e-30	0.566116	0.49	0.433	2.10403e-25	STB-1	NDUFAF6
ATG10	7.11101e-30	0.672923	0.407	0.345	2.22916e-25	STB-1	ATG10
PIK3CB	7.14852e-30	0.29248	0.924	0.925	2.24092e-25	STB-1	PIK3CB
TMEM14B	7.43702e-30	0.413273	0.607	0.563	2.33136e-25	STB-1	TMEM14B
TP53INP1	8.01277e-30	0.555663	0.404	0.333	2.51184e-25	STB-1	TP53INP1
TMX1	8.09136e-30	0.494981	0.444	0.376	2.53648e-25	STB-1	TMX1
AL139807.1	8.46268e-30	0.669351	0.385	0.313	2.65288e-25	STB-1	AL139807.1
BBS9	1.02177e-29	0.868009	0.312	0.246	3.20304e-25	STB-1	BBS9
IGF1R	1.06582e-29	0.291112	0.814	0.806	3.34112e-25	STB-1	IGF1R
PCNX1	1.12752e-29	0.517349	0.487	0.43	3.53456e-25	STB-1	PCNX1
TRIML2	1.19392e-29	0.921995	0.261	0.194	3.74269e-25	STB-1	TRIML2
ZNF562	1.23782e-29	0.512628	0.451	0.385	3.88031e-25	STB-1	ZNF562
NEK1	1.29937e-29	0.618717	0.374	0.305	4.07326e-25	STB-1	NEK1
RAB5A	1.49741e-29	0.266856	0.778	0.756	4.6941e-25	STB-1	RAB5A
SENP6	1.49915e-29	0.26553	0.828	0.836	4.69952e-25	STB-1	SENP6
PSMD7	1.53084e-29	0.332255	0.723	0.681	4.79888e-25	STB-1	PSMD7
TSC1	1.54036e-29	0.401984	0.579	0.526	4.82873e-25	STB-1	TSC1
UBR3	1.98023e-29	0.256356	0.831	0.832	6.20763e-25	STB-1	UBR3
MIOS	2.14271e-29	0.431061	0.494	0.431	6.71697e-25	STB-1	MIOS
PCSK5	2.23106e-29	0.455613	0.499	0.428	6.99392e-25	STB-1	PCSK5
SLC25A37	2.3399e-29	0.669859	0.387	0.321	7.3351e-25	STB-1	SLC25A37
TENT2	2.37407e-29	0.34689	0.698	0.685	7.44223e-25	STB-1	TENT2
TNPO1	2.50321e-29	0.253223	0.85	0.846	7.84706e-25	STB-1	TNPO1
MSL2	2.63072e-29	0.341292	0.659	0.626	8.2468e-25	STB-1	MSL2
ZNF410	2.86421e-29	0.414927	0.525	0.467	8.97874e-25	STB-1	ZNF410
LLGL2	3.18543e-29	0.728546	0.282	0.214	9.98568e-25	STB-1	LLGL2
RASEF	3.70181e-29	0.505142	0.343	0.269	1.16044e-24	STB-1	RASEF
EFHC1	3.85776e-29	0.509029	0.368	0.29	1.20933e-24	STB-1	EFHC1
PIGN	4.02994e-29	0.352242	0.652	0.611	1.2633e-24	STB-1	PIGN
COPB2	4.81436e-29	0.358232	0.808	0.802	1.50921e-24	STB-1	COPB2
AGL	5.20163e-29	0.659734	0.288	0.217	1.63061e-24	STB-1	AGL
SARAF	5.21451e-29	0.343271	0.701	0.67	1.63464e-24	STB-1	SARAF
MARF1	6.16645e-29	0.495564	0.428	0.36	1.93306e-24	STB-1	MARF1
MBTPS1	7.02891e-29	0.426936	0.574	0.525	2.20342e-24	STB-1	MBTPS1
RAB3IP	7.22145e-29	0.630464	0.323	0.254	2.26378e-24	STB-1	RAB3IP
MRTFB	7.27076e-29	0.285878	0.765	0.743	2.27924e-24	STB-1	MRTFB
RUFY2	7.81466e-29	0.574139	0.385	0.317	2.44974e-24	STB-1	RUFY2
MRPS9	7.81693e-29	0.669438	0.276	0.208	2.45045e-24	STB-1	MRPS9
BTG1	7.95184e-29	0.3035	0.953	0.948	2.49274e-24	STB-1	BTG1
ZNF714	9.15247e-29	0.729964	0.253	0.187	2.86912e-24	STB-1	ZNF714
DEPDC4	9.7163e-29	0.485523	0.501	0.432	3.04586e-24	STB-1	DEPDC4
POLK	1.14227e-28	0.618001	0.327	0.26	3.5808e-24	STB-1	POLK
JUN	1.28853e-28	0.702765	0.304	0.235	4.03928e-24	STB-1	JUN
FARP1	1.36884e-28	0.706925	0.259	0.193	4.29104e-24	STB-1	FARP1
BMPR2	1.3829e-28	0.268288	0.817	0.808	4.3351e-24	STB-1	BMPR2
PLAG1	1.42197e-28	0.650555	0.312	0.245	4.45758e-24	STB-1	PLAG1
MOB1A	1.54781e-28	0.703187	0.256	0.189	4.85207e-24	STB-1	MOB1A
RNF185	1.5734e-28	0.326027	0.697	0.657	4.93228e-24	STB-1	RNF185
VPS37B	1.60899e-28	0.40555	0.645	0.606	5.04387e-24	STB-1	VPS37B
PCMTD1	1.75234e-28	0.325633	0.72	0.692	5.49324e-24	STB-1	PCMTD1
CAB39L	1.86774e-28	0.564098	0.35	0.282	5.85498e-24	STB-1	CAB39L
ARID4B	1.87452e-28	0.259568	0.852	0.842	5.87625e-24	STB-1	ARID4B
RTN4	2.00019e-28	0.26302	0.861	0.858	6.2702e-24	STB-1	RTN4
VRK2	2.02285e-28	0.529185	0.423	0.358	6.34122e-24	STB-1	VRK2
KIAA1958	2.53939e-28	0.650136	0.336	0.27	7.96047e-24	STB-1	KIAA1958
ANKRA2	2.68528e-28	0.625728	0.348	0.28	8.41781e-24	STB-1	ANKRA2
ERBB3	3.52647e-28	0.371552	0.634	0.585	1.10548e-23	STB-1	ERBB3
C7orf50	3.58369e-28	0.558479	0.443	0.375	1.12342e-23	STB-1	C7orf50
CASD1	3.74986e-28	0.614081	0.338	0.271	1.17551e-23	STB-1	CASD1
AUH	3.95952e-28	0.321782	0.737	0.717	1.24123e-23	STB-1	AUH
NEDD9	4.06398e-28	0.497944	0.456	0.389	1.27398e-23	STB-1	NEDD9
RORA-AS1	4.87577e-28	0.711643	0.265	0.2	1.52846e-23	STB-1	RORA-AS1
TES	5.99531e-28	0.396633	0.656	0.614	1.87941e-23	STB-1	TES
ATP8B1	7.00175e-28	0.398338	0.592	0.542	2.19491e-23	STB-1	ATP8B1
PSMD11	7.39655e-28	0.357352	0.648	0.607	2.31867e-23	STB-1	PSMD11
EP400	7.49178e-28	0.253086	0.82	0.815	2.34852e-23	STB-1	EP400
RARS2	8.02501e-28	0.330621	0.668	0.642	2.51568e-23	STB-1	RARS2
SEPTIN9	8.68781e-28	0.453433	0.534	0.48	2.72345e-23	STB-1	SEPTIN9
DYNC1I2	8.90799e-28	0.346042	0.662	0.627	2.79248e-23	STB-1	DYNC1I2
AC109927.1	8.91818e-28	0.792852	0.407	0.348	2.79567e-23	STB-1	AC109927.1
RBPMS	9.14934e-28	0.6895	0.28	0.214	2.86814e-23	STB-1	RBPMS
SCP2	9.82208e-28	0.677719	0.269	0.204	3.07903e-23	STB-1	SCP2
ZDHHC6	1.08302e-27	0.63828	0.277	0.21	3.39505e-23	STB-1	ZDHHC6
MAPK1IP1L	1.20925e-27	0.330525	0.662	0.627	3.79075e-23	STB-1	MAPK1IP1L
CCDC125	1.21394e-27	0.44495	0.542	0.492	3.80546e-23	STB-1	CCDC125
RARS	1.22138e-27	0.313903	0.706	0.682	3.82878e-23	STB-1	RARS
FBXO34	1.68829e-27	0.329457	0.729	0.702	5.29245e-23	STB-1	FBXO34
MFSD8	1.70463e-27	0.34053	0.62	0.574	5.34368e-23	STB-1	MFSD8
FBRSL1	2.21965e-27	0.436832	0.423	0.35	6.95817e-23	STB-1	FBRSL1
ZNF267	2.30811e-27	0.638733	0.272	0.205	7.23548e-23	STB-1	ZNF267
ZBTB44	2.40059e-27	0.505951	0.477	0.42	7.52535e-23	STB-1	ZBTB44
LINC02669	2.4459e-27	0.625969	0.432	0.367	7.66741e-23	STB-1	LINC02669
KHDRBS1	2.57325e-27	0.308541	0.677	0.647	8.06663e-23	STB-1	KHDRBS1
LAMP1	2.62169e-27	0.294979	0.736	0.705	8.21848e-23	STB-1	LAMP1
NAP1L1	2.78484e-27	0.453674	0.542	0.487	8.72991e-23	STB-1	NAP1L1
CASC4	3.29614e-27	0.648512	0.342	0.279	1.03327e-22	STB-1	CASC4
PPP1R1C	4.05245e-27	0.636659	0.437	0.369	1.27036e-22	STB-1	PPP1R1C
LDHA	4.06567e-27	0.407079	0.65	0.604	1.27451e-22	STB-1	LDHA
ZNF106	4.92506e-27	0.421203	0.503	0.442	1.54391e-22	STB-1	ZNF106
RSBN1L	5.13917e-27	0.350785	0.654	0.615	1.61103e-22	STB-1	RSBN1L
PAK4	5.43514e-27	0.502626	0.478	0.418	1.70381e-22	STB-1	PAK4
TMEM94	5.4956e-27	0.412483	0.574	0.523	1.72276e-22	STB-1	TMEM94
UHMK1	5.90674e-27	0.47661	0.449	0.386	1.85165e-22	STB-1	UHMK1
PHF3	6.02019e-27	0.341023	0.705	0.687	1.88721e-22	STB-1	PHF3
SOS1	6.46359e-27	0.335558	0.702	0.677	2.02621e-22	STB-1	SOS1
OBI1	7.24085e-27	0.570985	0.273	0.204	2.26986e-22	STB-1	OBI1
MDM4	7.86247e-27	0.251998	0.813	0.81	2.46473e-22	STB-1	MDM4
RSF1	8.11855e-27	0.418922	0.536	0.482	2.545e-22	STB-1	RSF1
TESK2	9.10627e-27	0.305955	0.781	0.759	2.85463e-22	STB-1	TESK2
GNPTAB	9.72061e-27	0.495254	0.349	0.279	3.04722e-22	STB-1	GNPTAB
OSTF1	9.77657e-27	0.327227	0.651	0.618	3.06476e-22	STB-1	OSTF1
WIPF2	9.99048e-27	0.273491	0.765	0.751	3.13182e-22	STB-1	WIPF2
BRCA2	1.08962e-26	0.640162	0.276	0.21	3.41575e-22	STB-1	BRCA2
CDC16	1.21906e-26	0.460163	0.477	0.419	3.82152e-22	STB-1	CDC16
SPTAN1	1.2802e-26	0.370154	0.601	0.553	4.01316e-22	STB-1	SPTAN1
SBNO1	1.35594e-26	0.311	0.683	0.649	4.25061e-22	STB-1	SBNO1
AL139260.1	1.45117e-26	0.421535	0.573	0.515	4.54912e-22	STB-1	AL139260.1
TRIM14	1.52149e-26	0.497044	0.516	0.46	4.76957e-22	STB-1	TRIM14
PGK1	2.06029e-26	0.366959	0.635	0.589	6.45861e-22	STB-1	PGK1
NECTIN4	2.11554e-26	0.378055	0.711	0.674	6.6318e-22	STB-1	NECTIN4
AC079062.1	2.86597e-26	0.358469	0.678	0.669	8.98423e-22	STB-1	AC079062.1
ITGB1BP1	3.27557e-26	0.625898	0.315	0.25	1.02682e-21	STB-1	ITGB1BP1
ABCD4	3.56222e-26	0.651591	0.253	0.189	1.11669e-21	STB-1	ABCD4
IQCB1	3.56271e-26	0.518407	0.45	0.391	1.11684e-21	STB-1	IQCB1
CLASP2	3.57992e-26	0.278994	0.78	0.772	1.12223e-21	STB-1	CLASP2
SLAIN2	3.63643e-26	0.274916	0.772	0.758	1.13995e-21	STB-1	SLAIN2
LYPD3	3.99927e-26	0.353264	0.736	0.706	1.25369e-21	STB-1	LYPD3
SPTLC1	4.04843e-26	0.288739	0.782	0.765	1.2691e-21	STB-1	SPTLC1
MAP3K7	4.15684e-26	0.326602	0.655	0.621	1.30309e-21	STB-1	MAP3K7
ANKRD6	4.29499e-26	0.651863	0.284	0.219	1.34639e-21	STB-1	ANKRD6
SLC25A17	4.98907e-26	0.548178	0.356	0.291	1.56397e-21	STB-1	SLC25A17
RIPOR2	5.00035e-26	0.51163	0.633	0.581	1.56751e-21	STB-1	RIPOR2
NIPA2	5.00452e-26	0.35775	0.607	0.56	1.56882e-21	STB-1	NIPA2
SAFB2	5.34927e-26	0.307864	0.605	0.546	1.67689e-21	STB-1	SAFB2
ABHD12	5.63084e-26	0.283846	0.781	0.758	1.76516e-21	STB-1	ABHD12
AL359094.1	6.70979e-26	0.67379	0.25	0.187	2.10339e-21	STB-1	AL359094.1
PTDSS1	8.7757e-26	0.476776	0.555	0.508	2.75101e-21	STB-1	PTDSS1
ZNF706	9.17257e-26	0.371196	0.544	0.486	2.87542e-21	STB-1	ZNF706
MFAP3	9.63592e-26	0.570833	0.326	0.259	3.02067e-21	STB-1	MFAP3
TEX10	1.02532e-25	0.270949	0.73	0.718	3.21416e-21	STB-1	TEX10
TMEM245	1.0312e-25	0.642796	0.351	0.292	3.23262e-21	STB-1	TMEM245
FAM20B	1.06368e-25	0.612981	0.272	0.208	3.33443e-21	STB-1	FAM20B
SARS	1.10944e-25	0.601004	0.375	0.313	3.47787e-21	STB-1	SARS
SNX2	1.13627e-25	0.343792	0.661	0.634	3.56197e-21	STB-1	SNX2
SCYL2	1.21888e-25	0.288418	0.717	0.693	3.82094e-21	STB-1	SCYL2
SLC12A9	1.25123e-25	0.550768	0.336	0.27	3.92236e-21	STB-1	SLC12A9
LAMTOR5-AS1	1.35414e-25	0.492055	0.335	0.268	4.24497e-21	STB-1	LAMTOR5-AS1
TSPOAP1-AS1	1.55239e-25	0.666907	0.264	0.2	4.86644e-21	STB-1	TSPOAP1-AS1
USP9X	1.57475e-25	0.253826	0.782	0.773	4.93652e-21	STB-1	USP9X
VTI1A	1.57499e-25	0.25163	0.868	0.868	4.93729e-21	STB-1	VTI1A
TRIM44	1.88108e-25	0.386903	0.463	0.395	5.89681e-21	STB-1	TRIM44
COL1A2	1.88454e-25	0.414598	0.48	0.406	5.90764e-21	STB-1	COL1A2
ZNF235	1.9965e-25	0.552896	0.368	0.304	6.25862e-21	STB-1	ZNF235
LEPROT	2.42476e-25	0.421341	0.526	0.47	7.60115e-21	STB-1	LEPROT
LRPPRC	3.00388e-25	0.28906	0.794	0.783	9.41655e-21	STB-1	LRPPRC
EIF1B	3.36517e-25	0.628842	0.274	0.209	1.05491e-20	STB-1	EIF1B
AC026202.2	3.58924e-25	0.370537	0.774	0.755	1.12515e-20	STB-1	AC026202.2
BRD9	4.96048e-25	0.401311	0.565	0.521	1.55501e-20	STB-1	BRD9
CD274	5.0694e-25	0.38977	0.598	0.548	1.58916e-20	STB-1	CD274
DYNC1LI2	5.46913e-25	0.299675	0.664	0.625	1.71446e-20	STB-1	DYNC1LI2
RNPS1	6.47598e-25	0.316844	0.634	0.595	2.03009e-20	STB-1	RNPS1
PGS1	7.00725e-25	0.504924	0.361	0.297	2.19663e-20	STB-1	PGS1
MAP3K19	7.3426e-25	0.657263	0.272	0.207	2.30176e-20	STB-1	MAP3K19
HAT1	8.32302e-25	0.631652	0.267	0.204	2.6091e-20	STB-1	HAT1
FEM1C	9.99633e-25	0.595811	0.287	0.223	3.13365e-20	STB-1	FEM1C
TVP23C	1.09197e-24	0.535905	0.458	0.405	3.42312e-20	STB-1	TVP23C
YWHAQ	1.20258e-24	0.400367	0.562	0.513	3.76985e-20	STB-1	YWHAQ
TRAF6	1.21268e-24	0.501578	0.381	0.316	3.80152e-20	STB-1	TRAF6
ENTPD4	1.41682e-24	0.5753	0.291	0.226	4.44144e-20	STB-1	ENTPD4
FGFR1OP2	1.56973e-24	0.417011	0.455	0.391	4.92078e-20	STB-1	FGFR1OP2
UBL3	1.68731e-24	0.587622	0.312	0.249	5.28938e-20	STB-1	UBL3
BAIAP2L1	1.72655e-24	0.55428	0.388	0.331	5.4124e-20	STB-1	BAIAP2L1
POR	1.76414e-24	0.330557	0.701	0.675	5.53023e-20	STB-1	POR
IFT43	1.76639e-24	0.623764	0.291	0.228	5.53726e-20	STB-1	IFT43
TMEM168	1.77655e-24	0.56732	0.327	0.265	5.56912e-20	STB-1	TMEM168
SEPTIN7	1.78667e-24	0.268282	0.74	0.726	5.60084e-20	STB-1	SEPTIN7
SPTLC2	1.88168e-24	0.706204	0.251	0.192	5.89869e-20	STB-1	SPTLC2
OSTM1	1.94659e-24	0.384961	0.497	0.431	6.10218e-20	STB-1	OSTM1
GLIS3	1.95626e-24	0.540124	0.45	0.385	6.13247e-20	STB-1	GLIS3
AC011933.4	1.97124e-24	0.507143	0.453	0.394	6.17944e-20	STB-1	AC011933.4
ATP6V1C1	2.05004e-24	0.309997	0.688	0.657	6.42646e-20	STB-1	ATP6V1C1
TBRG1	2.21588e-24	0.386545	0.576	0.533	6.94633e-20	STB-1	TBRG1
ZNF808	2.34969e-24	0.43131	0.419	0.354	7.36581e-20	STB-1	ZNF808
WDR47	2.81844e-24	0.731994	0.265	0.205	8.83524e-20	STB-1	WDR47
SS18	3.04012e-24	0.310371	0.647	0.617	9.53018e-20	STB-1	SS18
CRYBG3	3.16986e-24	0.499561	0.413	0.353	9.93688e-20	STB-1	CRYBG3
ACOT13	3.47706e-24	0.67591	0.317	0.255	1.08999e-19	STB-1	ACOT13
TOMM34	3.59294e-24	0.557806	0.263	0.2	1.12631e-19	STB-1	TOMM34
KDM3B	3.71704e-24	0.382336	0.541	0.493	1.16522e-19	STB-1	KDM3B
KHDC4	4.21693e-24	0.351165	0.606	0.561	1.32192e-19	STB-1	KHDC4
TUT4	4.74878e-24	0.398503	0.677	0.665	1.48865e-19	STB-1	TUT4
ARRDC3	4.9137e-24	0.407086	0.555	0.494	1.54035e-19	STB-1	ARRDC3
ALOX12-AS1	4.93702e-24	0.408633	0.551	0.496	1.54766e-19	STB-1	ALOX12-AS1
AP000779.1	5.20788e-24	0.542677	0.281	0.216	1.63256e-19	STB-1	AP000779.1
LNX2	6.43266e-24	0.481798	0.315	0.249	2.01651e-19	STB-1	LNX2
AL357153.2	7.04516e-24	0.58557	0.405	0.349	2.20852e-19	STB-1	AL357153.2
TMEM30A	7.08354e-24	0.277385	0.743	0.728	2.22055e-19	STB-1	TMEM30A
CFAP97	7.8914e-24	0.595072	0.339	0.279	2.47379e-19	STB-1	CFAP97
FXR1	9.89688e-24	0.48679	0.457	0.402	3.10247e-19	STB-1	FXR1
ATG14	9.93518e-24	0.44889	0.432	0.37	3.11448e-19	STB-1	ATG14
LUC7L	1.00682e-23	0.31451	0.645	0.615	3.15618e-19	STB-1	LUC7L
MAPK8IP3	1.00862e-23	0.341288	0.583	0.519	3.16183e-19	STB-1	MAPK8IP3
POLR1D	1.04384e-23	0.484811	0.377	0.313	3.27222e-19	STB-1	POLR1D
BHLHE40	1.12723e-23	0.517955	0.467	0.415	3.53365e-19	STB-1	BHLHE40
LINC02055	1.25692e-23	0.392524	0.668	0.639	3.94018e-19	STB-1	LINC02055
LSM8	1.42567e-23	0.53486	0.359	0.299	4.46918e-19	STB-1	LSM8
ADGRG1	1.4459e-23	0.586207	0.29	0.227	4.53259e-19	STB-1	ADGRG1
CNOT7	1.58883e-23	0.457335	0.436	0.379	4.98067e-19	STB-1	CNOT7
RBM26	1.65235e-23	0.262875	0.773	0.777	5.17978e-19	STB-1	RBM26
PANK3	1.66002e-23	0.302979	0.665	0.634	5.20382e-19	STB-1	PANK3
ZNF552	1.76551e-23	0.338288	0.599	0.553	5.53452e-19	STB-1	ZNF552
CEP295	1.89243e-23	0.674435	0.25	0.191	5.9324e-19	STB-1	CEP295
MAP7D2	1.9227e-23	0.628319	0.263	0.202	6.02727e-19	STB-1	MAP7D2
NEDD4L	2.11091e-23	0.291186	0.737	0.691	6.61728e-19	STB-1	NEDD4L
INSYN2A	2.66075e-23	0.501653	0.359	0.294	8.34092e-19	STB-1	INSYN2A
ZNF175	3.34779e-23	0.405613	0.402	0.334	1.04947e-18	STB-1	ZNF175
IFRD1	3.58904e-23	0.340565	0.746	0.742	1.12509e-18	STB-1	IFRD1
CEP104	4.02372e-23	0.57803	0.268	0.208	1.26135e-18	STB-1	CEP104
MORF4L2	4.20654e-23	0.267083	0.925	0.921	1.31867e-18	STB-1	MORF4L2
PPIA	4.2892e-23	0.279502	0.726	0.694	1.34458e-18	STB-1	PPIA
C1orf52	5.91813e-23	0.460633	0.451	0.393	1.85522e-18	STB-1	C1orf52
TUBA1C	6.33462e-23	0.357877	0.577	0.523	1.98578e-18	STB-1	TUBA1C
ZNF160	8.30408e-23	0.320092	0.65	0.609	2.60316e-18	STB-1	ZNF160
ODF2L	8.73799e-23	0.575465	0.336	0.279	2.73919e-18	STB-1	ODF2L
CNOT2	9.00912e-23	0.270733	0.793	0.791	2.82418e-18	STB-1	CNOT2
BLVRB	9.70754e-23	0.697194	0.269	0.211	3.04312e-18	STB-1	BLVRB
MED6	9.83276e-23	0.395135	0.466	0.409	3.08237e-18	STB-1	MED6
MTMR14	1.02743e-22	0.408058	0.433	0.373	3.2208e-18	STB-1	MTMR14
NME7	1.07277e-22	0.916696	0.271	0.211	3.36292e-18	STB-1	NME7
WSB1	1.20403e-22	0.359502	0.934	0.944	3.77439e-18	STB-1	WSB1
ZNF813	1.22302e-22	0.535116	0.335	0.274	3.83392e-18	STB-1	ZNF813
EPN2	1.25241e-22	0.3079	0.63	0.593	3.92606e-18	STB-1	EPN2
NOM1	1.259e-22	0.471406	0.386	0.325	3.94672e-18	STB-1	NOM1
TTLL3	1.29599e-22	0.363336	0.595	0.557	4.06268e-18	STB-1	TTLL3
EDEM1	1.3039e-22	0.288402	0.747	0.722	4.08747e-18	STB-1	EDEM1
NEK9	1.31044e-22	0.459521	0.421	0.362	4.10796e-18	STB-1	NEK9
PIK3CA	1.38792e-22	0.555325	0.381	0.325	4.35085e-18	STB-1	PIK3CA
IVNS1ABP	1.41693e-22	0.557515	0.344	0.284	4.44181e-18	STB-1	IVNS1ABP
ALDH7A1	1.47361e-22	0.781391	0.303	0.248	4.61946e-18	STB-1	ALDH7A1
TTF1	1.79178e-22	0.448367	0.429	0.37	5.61686e-18	STB-1	TTF1
MIR17HG	1.88556e-22	0.553622	0.357	0.299	5.91086e-18	STB-1	MIR17HG
MOB3B	1.91567e-22	0.523451	0.357	0.297	6.00523e-18	STB-1	MOB3B
PRKRIP1	2.12576e-22	0.34823	0.655	0.639	6.66383e-18	STB-1	PRKRIP1
SLMAP	2.26572e-22	0.474199	0.446	0.393	7.10258e-18	STB-1	SLMAP
NUP88	2.38224e-22	0.370445	0.531	0.483	7.46785e-18	STB-1	NUP88
SAP18	2.83609e-22	0.398715	0.536	0.487	8.89059e-18	STB-1	SAP18
LIN7C	2.89391e-22	0.396801	0.424	0.36	9.07184e-18	STB-1	LIN7C
PLAAT3	3.03199e-22	0.287806	0.627	0.575	9.50467e-18	STB-1	PLAAT3
MYH9	3.05221e-22	0.331405	0.639	0.6	9.56807e-18	STB-1	MYH9
EPG5	3.06929e-22	0.300753	0.648	0.611	9.62162e-18	STB-1	EPG5
CWC25	3.21585e-22	0.305209	0.577	0.524	1.00811e-17	STB-1	CWC25
SCAMP4	3.65119e-22	0.336455	0.621	0.584	1.14458e-17	STB-1	SCAMP4
KIAA1109	4.30305e-22	0.362828	0.607	0.578	1.34892e-17	STB-1	KIAA1109
SLC35F5	4.98999e-22	0.330777	0.616	0.584	1.56426e-17	STB-1	SLC35F5
MALT1	5.0442e-22	0.407418	0.441	0.384	1.58126e-17	STB-1	MALT1
WDR44	5.30907e-22	0.481148	0.397	0.341	1.66429e-17	STB-1	WDR44
DNAJC6	5.65934e-22	0.467926	0.528	0.475	1.77409e-17	STB-1	DNAJC6
BIN3	5.83182e-22	0.406744	0.451	0.392	1.82816e-17	STB-1	BIN3
MSMO1	6.12202e-22	0.327563	0.733	0.707	1.91913e-17	STB-1	MSMO1
IFNAR1	6.4262e-22	0.560282	0.26	0.201	2.01449e-17	STB-1	IFNAR1
HPS5	6.79896e-22	0.605548	0.287	0.228	2.13134e-17	STB-1	HPS5
DDX46	6.97851e-22	0.253294	0.823	0.822	2.18762e-17	STB-1	DDX46
C11orf49	7.45728e-22	0.442348	0.446	0.39	2.33771e-17	STB-1	C11orf49
COPA	8.04347e-22	0.270303	0.782	0.772	2.52147e-17	STB-1	COPA
MTPN	8.24381e-22	0.363653	0.578	0.539	2.58427e-17	STB-1	MTPN
GLRX3	8.32173e-22	0.405256	0.541	0.5	2.6087e-17	STB-1	GLRX3
NSFL1C	8.70804e-22	0.436437	0.425	0.367	2.7298e-17	STB-1	NSFL1C
PUDP	8.75758e-22	0.362233	0.588	0.547	2.74533e-17	STB-1	PUDP
C19orf25	9.50551e-22	0.367545	0.575	0.535	2.97979e-17	STB-1	C19orf25
CCDC14	9.79548e-22	0.615429	0.275	0.218	3.07069e-17	STB-1	CCDC14
ZMYM1	1.01779e-21	0.499601	0.375	0.317	3.19058e-17	STB-1	ZMYM1
TMEM189	1.227e-21	0.331521	0.586	0.538	3.84639e-17	STB-1	TMEM189
CEP95	1.47812e-21	0.358929	0.601	0.569	4.63361e-17	STB-1	CEP95
CHD6	1.50448e-21	0.571686	0.294	0.236	4.71624e-17	STB-1	CHD6
IDS	1.63534e-21	0.315642	0.736	0.709	5.12645e-17	STB-1	IDS
EXTL2	1.70781e-21	0.524673	0.344	0.288	5.35365e-17	STB-1	EXTL2
FAM204A	1.7266e-21	0.52142	0.363	0.309	5.41254e-17	STB-1	FAM204A
TCAIM	1.73589e-21	0.555126	0.322	0.266	5.44165e-17	STB-1	TCAIM
IAH1	1.90366e-21	0.515271	0.301	0.239	5.96759e-17	STB-1	IAH1
USP24	2.17624e-21	0.473516	0.426	0.379	6.82207e-17	STB-1	USP24
DHX15	2.20125e-21	0.251139	0.74	0.731	6.90049e-17	STB-1	DHX15
ETS2	2.25573e-21	0.543436	0.31	0.25	7.07127e-17	STB-1	ETS2
POLR2A	2.26105e-21	0.390093	0.621	0.583	7.08793e-17	STB-1	POLR2A
ZNF654	2.51077e-21	0.327163	0.633	0.605	7.87077e-17	STB-1	ZNF654
MGLL	2.56605e-21	0.52762	0.361	0.303	8.04404e-17	STB-1	MGLL
ARL6IP1	2.69199e-21	0.327485	0.612	0.564	8.43886e-17	STB-1	ARL6IP1
DHX36	3.18058e-21	0.283882	0.703	0.689	9.9705e-17	STB-1	DHX36
RAD52	3.42439e-21	0.5976	0.281	0.223	1.07348e-16	STB-1	RAD52
PCBP2	3.80493e-21	0.277727	0.688	0.672	1.19277e-16	STB-1	PCBP2
LRP2	4.08664e-21	0.477367	0.615	0.586	1.28108e-16	STB-1	LRP2
BUB3	4.23472e-21	0.522543	0.304	0.245	1.3275e-16	STB-1	BUB3
LINC00630	4.27149e-21	0.546575	0.322	0.264	1.33903e-16	STB-1	LINC00630
CMTM6	4.61701e-21	0.425287	0.455	0.401	1.44734e-16	STB-1	CMTM6
CRBN	5.3472e-21	0.440429	0.441	0.386	1.67624e-16	STB-1	CRBN
ZNF280C	5.3638e-21	0.555574	0.285	0.227	1.68144e-16	STB-1	ZNF280C
YPEL5	5.60678e-21	0.321812	0.595	0.553	1.75761e-16	STB-1	YPEL5
SAMD4B	6.52536e-21	0.343465	0.637	0.604	2.04557e-16	STB-1	SAMD4B
PPP2CB	6.64895e-21	0.361956	0.59	0.551	2.08431e-16	STB-1	PPP2CB
ZC3H13	7.10256e-21	0.257314	0.732	0.716	2.22651e-16	STB-1	ZC3H13
RIOK3	7.13945e-21	0.2632	0.757	0.726	2.23807e-16	STB-1	RIOK3
NKIRAS1	7.63341e-21	0.430868	0.395	0.338	2.39292e-16	STB-1	NKIRAS1
TCERG1	7.67732e-21	0.283832	0.67	0.644	2.40669e-16	STB-1	TCERG1
NGLY1	8.26869e-21	0.361461	0.631	0.594	2.59207e-16	STB-1	NGLY1
MED21	8.38453e-21	0.496203	0.289	0.229	2.62838e-16	STB-1	MED21
VPS36	8.67148e-21	0.417213	0.478	0.431	2.71833e-16	STB-1	VPS36
MT-ND2	9.01192e-21	0.312983	0.968	0.968	2.82506e-16	STB-1	MT-ND2
2025-03-06	9.08596e-21	0.258887	0.737	0.725	2.84827e-16	STB-1	2025-03-06
ITIH5	9.38131e-21	0.612588	0.459	0.41	2.94085e-16	STB-1	ITIH5
ATXN3	9.72375e-21	0.468476	0.427	0.375	3.0482e-16	STB-1	ATXN3
NPTN	1.00403e-20	0.262976	0.705	0.678	3.14742e-16	STB-1	NPTN
ZNF700	1.23787e-20	0.596947	0.252	0.197	3.88047e-16	STB-1	ZNF700
TPM3	1.56353e-20	0.325423	0.598	0.555	4.90137e-16	STB-1	TPM3
NUP85	1.65221e-20	0.522193	0.351	0.294	5.17934e-16	STB-1	NUP85
MSH6	1.65333e-20	0.386665	0.471	0.413	5.18285e-16	STB-1	MSH6
COPS6	1.73503e-20	0.419088	0.477	0.426	5.43898e-16	STB-1	COPS6
MTDH	1.74103e-20	0.492346	0.386	0.332	5.45779e-16	STB-1	MTDH
PRKDC	1.78393e-20	0.265047	0.741	0.738	5.59225e-16	STB-1	PRKDC
FARP2	1.83754e-20	0.336108	0.611	0.58	5.76032e-16	STB-1	FARP2
SSB	1.87799e-20	0.417646	0.477	0.424	5.88713e-16	STB-1	SSB
TBC1D5	1.89431e-20	0.407322	0.806	0.82	5.93828e-16	STB-1	TBC1D5
ARHGEF18	1.8979e-20	0.518269	0.328	0.271	5.94954e-16	STB-1	ARHGEF18
HCLS1	2.071e-20	0.649861	0.262	0.207	6.49218e-16	STB-1	HCLS1
AL356599.1	2.18147e-20	0.606977	0.312	0.256	6.83847e-16	STB-1	AL356599.1
G2E3	2.2236e-20	0.373513	0.547	0.508	6.97055e-16	STB-1	G2E3
SNAP29	2.58746e-20	0.370631	0.481	0.427	8.11118e-16	STB-1	SNAP29
PNPLA8	2.64156e-20	0.29697	0.748	0.737	8.28075e-16	STB-1	PNPLA8
DNAJC15	3.0306e-20	0.315349	0.61	0.571	9.50032e-16	STB-1	DNAJC15
MSI2	3.26091e-20	0.6358	0.296	0.243	1.02223e-15	STB-1	MSI2
GPX3	3.37425e-20	0.390192	0.63	0.59	1.05776e-15	STB-1	GPX3
PRPF18	3.39459e-20	0.406435	0.448	0.398	1.06414e-15	STB-1	PRPF18
H3F3B	3.5102e-20	0.308114	0.783	0.769	1.10038e-15	STB-1	H3F3B
ATAD5	3.53896e-20	0.574043	0.283	0.227	1.10939e-15	STB-1	ATAD5
PITHD1	3.56943e-20	0.42751	0.417	0.362	1.11894e-15	STB-1	PITHD1
SERPINB1	3.57005e-20	0.582711	0.274	0.218	1.11914e-15	STB-1	SERPINB1
AHCTF1	3.66219e-20	0.25296	0.721	0.707	1.14802e-15	STB-1	AHCTF1
RAD51B	3.86749e-20	0.394666	0.84	0.853	1.21238e-15	STB-1	RAD51B
ANKMY2	3.93575e-20	0.430977	0.427	0.374	1.23378e-15	STB-1	ANKMY2
HILPDA	4.11395e-20	0.259695	0.553	0.494	1.28964e-15	STB-1	HILPDA
TRIM56	4.42212e-20	0.449373	0.445	0.396	1.38625e-15	STB-1	TRIM56
ZBTB40	4.45851e-20	0.394491	0.516	0.476	1.39765e-15	STB-1	ZBTB40
TRRAP	4.69564e-20	0.298106	0.662	0.638	1.47199e-15	STB-1	TRRAP
TWF1	5.03969e-20	0.409394	0.458	0.406	1.57984e-15	STB-1	TWF1
UBA2	5.61763e-20	0.261986	0.718	0.7	1.76101e-15	STB-1	UBA2
HIF1AN	5.63825e-20	0.503615	0.293	0.238	1.76748e-15	STB-1	HIF1AN
UBN2	5.95218e-20	0.319242	0.658	0.634	1.86589e-15	STB-1	UBN2
YTHDF2	5.95492e-20	0.251638	0.745	0.737	1.86675e-15	STB-1	YTHDF2
TIAL1	5.96635e-20	0.277171	0.699	0.682	1.87033e-15	STB-1	TIAL1
SLC9A3R1	6.0603e-20	0.438773	0.402	0.346	1.89978e-15	STB-1	SLC9A3R1
ANAPC4	6.29421e-20	0.535307	0.313	0.259	1.97311e-15	STB-1	ANAPC4
MCUB	6.3458e-20	0.517085	0.285	0.227	1.98928e-15	STB-1	MCUB
DNAJC7	6.37417e-20	0.310835	0.622	0.595	1.99817e-15	STB-1	DNAJC7
PYROXD1	6.49519e-20	0.450011	0.372	0.316	2.03611e-15	STB-1	PYROXD1
PTPN3	6.80926e-20	0.563063	0.284	0.229	2.13457e-15	STB-1	PTPN3
SH2D3A	6.9938e-20	0.526494	0.391	0.341	2.19242e-15	STB-1	SH2D3A
VSIG10	7.59977e-20	0.599014	0.269	0.216	2.38238e-15	STB-1	VSIG10
NEPRO	7.79948e-20	0.476012	0.341	0.286	2.44498e-15	STB-1	NEPRO
AFMID	8.13155e-20	0.626206	0.265	0.211	2.54908e-15	STB-1	AFMID
ZYG11B	8.20238e-20	0.373866	0.534	0.494	2.57128e-15	STB-1	ZYG11B
RIOK1	8.3201e-20	0.474022	0.343	0.287	2.60818e-15	STB-1	RIOK1
PRKAB2	8.35073e-20	0.541693	0.348	0.294	2.61779e-15	STB-1	PRKAB2
ZNF480	8.48132e-20	0.555862	0.27	0.214	2.65872e-15	STB-1	ZNF480
PANK2	8.61477e-20	0.446641	0.41	0.358	2.70056e-15	STB-1	PANK2
TRIR	9.37671e-20	0.330895	0.561	0.515	2.93941e-15	STB-1	TRIR
AGO3	9.49222e-20	0.273371	0.717	0.708	2.97562e-15	STB-1	AGO3
RAD1	1.01692e-19	0.461127	0.363	0.302	3.18783e-15	STB-1	RAD1
STK35	1.07457e-19	0.475241	0.368	0.312	3.36857e-15	STB-1	STK35
C1orf115	1.12139e-19	0.290828	0.692	0.671	3.51533e-15	STB-1	C1orf115
INTS12	1.1744e-19	0.449711	0.42	0.37	3.6815e-15	STB-1	INTS12
HEBP2	1.26083e-19	0.466131	0.373	0.316	3.95245e-15	STB-1	HEBP2
DOCK7	1.33184e-19	0.335433	0.592	0.565	4.17506e-15	STB-1	DOCK7
EXOSC10	1.44347e-19	0.438091	0.406	0.353	4.52499e-15	STB-1	EXOSC10
ISCA1	1.52588e-19	0.353041	0.532	0.483	4.78331e-15	STB-1	ISCA1
C6orf62	1.61233e-19	0.261653	0.707	0.678	5.05435e-15	STB-1	C6orf62
RPAP2	1.68929e-19	0.368491	0.601	0.586	5.2956e-15	STB-1	RPAP2
CRY1	1.71483e-19	0.402318	0.527	0.485	5.37565e-15	STB-1	CRY1
C6orf89	1.82066e-19	0.324302	0.567	0.526	5.70739e-15	STB-1	C6orf89
RNF13	2.1512e-19	0.374699	0.588	0.559	6.74359e-15	STB-1	RNF13
STK38	2.17894e-19	0.319292	0.56	0.517	6.83054e-15	STB-1	STK38
GREB1L	2.52255e-19	0.5896	0.305	0.252	7.9077e-15	STB-1	GREB1L
AC004253.1	2.53711e-19	0.573005	0.286	0.232	7.95334e-15	STB-1	AC004253.1
HPS3	2.6683e-19	0.517602	0.286	0.23	8.36458e-15	STB-1	HPS3
BLOC1S6	3.35705e-19	0.540037	0.273	0.218	1.05237e-14	STB-1	BLOC1S6
SUDS3	3.39471e-19	0.345484	0.54	0.495	1.06417e-14	STB-1	SUDS3
AL139294.1	3.97779e-19	0.457228	0.404	0.346	1.24696e-14	STB-1	AL139294.1
ADGRA3	4.01631e-19	0.572316	0.274	0.221	1.25903e-14	STB-1	ADGRA3
RPAP3	4.04798e-19	0.575228	0.278	0.225	1.26896e-14	STB-1	RPAP3
CBFA2T2	4.3152e-19	0.304838	0.662	0.644	1.35273e-14	STB-1	CBFA2T2
MPZL1	4.78885e-19	0.306188	0.705	0.678	1.50121e-14	STB-1	MPZL1
IST1	4.99848e-19	0.278806	0.645	0.619	1.56692e-14	STB-1	IST1
WWC3	5.2675e-19	0.49788	0.291	0.234	1.65125e-14	STB-1	WWC3
AP001442.1	5.37436e-19	0.407734	0.481	0.432	1.68475e-14	STB-1	AP001442.1
UBE2V1	5.5633e-19	0.329333	0.547	0.498	1.74398e-14	STB-1	UBE2V1
MKRN3	5.63538e-19	0.571538	0.263	0.209	1.76658e-14	STB-1	MKRN3
BRI3	5.77454e-19	0.297388	0.602	0.564	1.8102e-14	STB-1	BRI3
DERA	6.11385e-19	0.533384	0.356	0.302	1.91657e-14	STB-1	DERA
TMEM87A	6.49555e-19	0.302678	0.639	0.623	2.03622e-14	STB-1	TMEM87A
DCP1A	6.53214e-19	0.26813	0.683	0.664	2.0477e-14	STB-1	DCP1A
NEB	6.67575e-19	0.489247	0.511	0.469	2.09271e-14	STB-1	NEB
SENP5	6.68154e-19	0.298696	0.668	0.654	2.09453e-14	STB-1	SENP5
CYP20A1	6.95452e-19	0.346571	0.467	0.416	2.1801e-14	STB-1	CYP20A1
HIVEP2	7.00918e-19	0.415695	0.255	0.201	2.19724e-14	STB-1	HIVEP2
STRBP	7.02024e-19	0.49167	0.404	0.354	2.20071e-14	STB-1	STRBP
TMEM59	7.07657e-19	0.289924	0.623	0.586	2.21836e-14	STB-1	TMEM59
AL158152.1	7.13051e-19	0.333332	0.538	0.498	2.23527e-14	STB-1	AL158152.1
GJB7	7.37278e-19	0.387055	0.539	0.491	2.31122e-14	STB-1	GJB7
ZBTB11	8.0446e-19	0.301019	0.691	0.669	2.52182e-14	STB-1	ZBTB11
TUBGCP3	8.42197e-19	0.571502	0.283	0.232	2.64012e-14	STB-1	TUBGCP3
UTP6	8.59361e-19	0.43394	0.41	0.359	2.69393e-14	STB-1	UTP6
NUP50	1.05088e-18	0.283569	0.617	0.582	3.29431e-14	STB-1	NUP50
RNF115	1.05895e-18	0.548708	0.294	0.242	3.31959e-14	STB-1	RNF115
TARDBP	1.06802e-18	0.332249	0.543	0.5	3.34803e-14	STB-1	TARDBP
RSBN1	1.1562e-18	0.445067	0.411	0.36	3.62446e-14	STB-1	RSBN1
HNRNPH3	1.36945e-18	0.26317	0.677	0.659	4.29294e-14	STB-1	HNRNPH3
ZNF264	1.37501e-18	0.531311	0.301	0.249	4.31039e-14	STB-1	ZNF264
DNAJC9	1.42394e-18	0.445572	0.491	0.45	4.46376e-14	STB-1	DNAJC9
GTF2H2	1.4463e-18	0.536698	0.25	0.197	4.53386e-14	STB-1	GTF2H2
AL157838.1	1.48166e-18	0.63036	0.308	0.256	4.64471e-14	STB-1	AL157838.1
SNHG14	1.51343e-18	0.29316	0.652	0.63	4.74429e-14	STB-1	SNHG14
HEATR5A	1.60408e-18	0.310449	0.716	0.706	5.02847e-14	STB-1	HEATR5A
TAF1B	1.75497e-18	0.365676	0.504	0.457	5.50147e-14	STB-1	TAF1B
SENP7	1.81381e-18	0.553353	0.334	0.285	5.68594e-14	STB-1	SENP7
SNX1	2.15056e-18	0.340874	0.571	0.543	6.74158e-14	STB-1	SNX1
RBBP5	2.16691e-18	0.481147	0.356	0.303	6.79282e-14	STB-1	RBBP5
AC104365.1	2.18577e-18	0.497046	0.298	0.244	6.85196e-14	STB-1	AC104365.1
ZNF506	2.55997e-18	0.586337	0.257	0.206	8.02501e-14	STB-1	ZNF506
PPP1R13B	3.09537e-18	0.452575	0.33	0.277	9.70336e-14	STB-1	PPP1R13B
NSL1	3.10762e-18	0.456585	0.358	0.305	9.74177e-14	STB-1	NSL1
TBC1D9	3.15701e-18	0.460651	0.338	0.284	9.8966e-14	STB-1	TBC1D9
ZC3H6	3.22238e-18	0.530033	0.402	0.352	1.01015e-13	STB-1	ZC3H6
HEATR5B	3.27615e-18	0.343748	0.554	0.516	1.02701e-13	STB-1	HEATR5B
DPP8	3.37937e-18	0.313668	0.58	0.547	1.05936e-13	STB-1	DPP8
CREB1	3.68615e-18	0.348344	0.552	0.515	1.15553e-13	STB-1	CREB1
ACAT2	4.53302e-18	0.445509	0.314	0.258	1.42101e-13	STB-1	ACAT2
DAPK3	4.64781e-18	0.3084	0.604	0.56	1.45699e-13	STB-1	DAPK3
ITGB4	5.19191e-18	0.511907	0.46	0.423	1.62756e-13	STB-1	ITGB4
GRIK1	5.28251e-18	0.48763	0.375	0.318	1.65596e-13	STB-1	GRIK1
ITFG1	5.31325e-18	0.382158	0.707	0.702	1.6656e-13	STB-1	ITFG1
VPS29	5.34358e-18	0.411501	0.363	0.308	1.6751e-13	STB-1	VPS29
RAB3GAP2	5.64823e-18	0.290373	0.631	0.6	1.77061e-13	STB-1	RAB3GAP2
SMG5	5.66542e-18	0.31787	0.577	0.546	1.77599e-13	STB-1	SMG5
SMYD4	5.74934e-18	0.533861	0.266	0.214	1.8023e-13	STB-1	SMYD4
MIER1	6.06042e-18	0.302155	0.635	0.611	1.89982e-13	STB-1	MIER1
PPP1CC	7.08593e-18	0.338099	0.514	0.467	2.2213e-13	STB-1	PPP1CC
FBXW11	7.11055e-18	0.285636	0.675	0.665	2.22902e-13	STB-1	FBXW11
YES1	7.14553e-18	0.286803	0.649	0.624	2.23998e-13	STB-1	YES1
ERG28	7.18916e-18	0.361054	0.473	0.422	2.25366e-13	STB-1	ERG28
ZNF121	7.29961e-18	0.373481	0.518	0.481	2.28828e-13	STB-1	ZNF121
SUN1	7.33227e-18	0.297616	0.641	0.621	2.29852e-13	STB-1	SUN1
TRMT10B	7.82345e-18	0.567884	0.315	0.267	2.4525e-13	STB-1	TRMT10B
SHPRH	8.01482e-18	0.481341	0.43	0.395	2.51248e-13	STB-1	SHPRH
DESI2	8.07178e-18	0.294709	0.62	0.588	2.53034e-13	STB-1	DESI2
APMAP	8.67906e-18	0.466885	0.291	0.237	2.72071e-13	STB-1	APMAP
UBE2Q2	9.02292e-18	0.366879	0.669	0.637	2.82851e-13	STB-1	UBE2Q2
CHERP	9.35209e-18	0.412809	0.413	0.356	2.93169e-13	STB-1	CHERP
SCAF4	9.43119e-18	0.314398	0.547	0.509	2.95649e-13	STB-1	SCAF4
MT-ND4L	1.0995e-17	0.339004	0.703	0.678	3.44671e-13	STB-1	MT-ND4L
LYRM2	1.16596e-17	0.419534	0.385	0.335	3.65506e-13	STB-1	LYRM2
ACVR2A	1.26721e-17	0.416145	0.418	0.367	3.97246e-13	STB-1	ACVR2A
NRXN3	1.27014e-17	0.505169	0.358	0.304	3.98165e-13	STB-1	NRXN3
JAK1	1.27934e-17	0.42764	0.346	0.292	4.01046e-13	STB-1	JAK1
ARMH4	1.32923e-17	0.316246	0.57	0.537	4.16687e-13	STB-1	ARMH4
FAM149B1	1.36165e-17	0.381137	0.425	0.382	4.2685e-13	STB-1	FAM149B1
RBM48	1.37715e-17	0.449204	0.326	0.271	4.3171e-13	STB-1	RBM48
RELCH	1.43308e-17	0.273521	0.675	0.659	4.49243e-13	STB-1	RELCH
ZFYVE21	1.45255e-17	0.480111	0.275	0.221	4.55344e-13	STB-1	ZFYVE21
MTAP	1.46097e-17	0.292812	0.625	0.594	4.57986e-13	STB-1	MTAP
ZNF451	1.56156e-17	0.34606	0.605	0.582	4.89519e-13	STB-1	ZNF451
KRAS	1.59034e-17	0.320118	0.564	0.525	4.98539e-13	STB-1	KRAS
CCDC18-AS1	1.80039e-17	0.473806	0.699	0.703	5.64386e-13	STB-1	CCDC18-AS1
ELOA-AS1	1.87535e-17	0.419905	0.502	0.465	5.87885e-13	STB-1	ELOA-AS1
CARS2	1.87712e-17	0.491216	0.445	0.402	5.88438e-13	STB-1	CARS2
CASK	2.05465e-17	0.463226	0.365	0.314	6.44091e-13	STB-1	CASK
KDM1B	2.17101e-17	0.511795	0.281	0.229	6.80569e-13	STB-1	KDM1B
ABCB7	2.25109e-17	0.505246	0.323	0.275	7.05671e-13	STB-1	ABCB7
GNA13	2.28301e-17	0.408279	0.454	0.407	7.15678e-13	STB-1	GNA13
PTCD3	2.44333e-17	0.346487	0.515	0.477	7.65934e-13	STB-1	PTCD3
CCT8	2.67677e-17	0.336288	0.522	0.48	8.39113e-13	STB-1	CCT8
SLC25A3	2.70187e-17	0.260474	0.63	0.592	8.46981e-13	STB-1	SLC25A3
AGTPBP1	2.70788e-17	0.382255	0.534	0.503	8.48867e-13	STB-1	AGTPBP1
SLC25A36	2.86726e-17	0.339832	0.539	0.507	8.98829e-13	STB-1	SLC25A36
DYNLL1	2.87729e-17	0.268164	0.679	0.645	9.01974e-13	STB-1	DYNLL1
GGT7	2.99541e-17	0.429464	0.338	0.285	9.39002e-13	STB-1	GGT7
SYN3	3.25453e-17	0.343011	0.384	0.331	1.02023e-12	STB-1	SYN3
PPP2R3C	3.26814e-17	0.411879	0.366	0.313	1.0245e-12	STB-1	PPP2R3C
PMPCB	3.87634e-17	0.376796	0.47	0.424	1.21515e-12	STB-1	PMPCB
MIR210HG	3.88598e-17	0.625906	0.334	0.288	1.21818e-12	STB-1	MIR210HG
ZNF652	3.99447e-17	0.480874	0.354	0.305	1.25219e-12	STB-1	ZNF652
THOC1	4.45773e-17	0.34203	0.536	0.496	1.39741e-12	STB-1	THOC1
ZNF302	4.4608e-17	0.497961	0.253	0.203	1.39837e-12	STB-1	ZNF302
DTWD1	5.22549e-17	0.58065	0.257	0.208	1.63809e-12	STB-1	DTWD1
BORCS7	5.48446e-17	0.417343	0.398	0.348	1.71927e-12	STB-1	BORCS7
IGBP1	6.52965e-17	0.476625	0.275	0.224	2.04691e-12	STB-1	IGBP1
PIKFYVE	6.60706e-17	0.384762	0.487	0.451	2.07118e-12	STB-1	PIKFYVE
EDRF1	7.84358e-17	0.396673	0.455	0.411	2.45881e-12	STB-1	EDRF1
CCNC	8.19544e-17	0.251455	0.746	0.741	2.56911e-12	STB-1	CCNC
RBM17	8.2351e-17	0.465574	0.289	0.237	2.58154e-12	STB-1	RBM17
LGALS3	8.29417e-17	0.504223	0.317	0.268	2.60006e-12	STB-1	LGALS3
FLOT1	8.50419e-17	0.447558	0.363	0.311	2.66589e-12	STB-1	FLOT1
BCL10	8.62467e-17	0.564566	0.25	0.201	2.70366e-12	STB-1	BCL10
EIF1AX	8.94347e-17	0.321983	0.589	0.557	2.8036e-12	STB-1	EIF1AX
ZDHHC17	8.97617e-17	0.433626	0.356	0.307	2.81385e-12	STB-1	ZDHHC17
ST8SIA4	9.56084e-17	0.345576	0.495	0.445	2.99713e-12	STB-1	ST8SIA4
PATL1	9.72869e-17	0.401988	0.374	0.322	3.04975e-12	STB-1	PATL1
MICU1	9.93376e-17	0.338799	0.599	0.579	3.11403e-12	STB-1	MICU1
AFTPH	1.00947e-16	0.256602	0.674	0.659	3.16448e-12	STB-1	AFTPH
TMBIM4	1.05202e-16	0.331222	0.542	0.504	3.29788e-12	STB-1	TMBIM4
BAZ1A	1.07854e-16	0.32821	0.593	0.564	3.38102e-12	STB-1	BAZ1A
AC002463.1	1.10327e-16	0.258043	0.668	0.635	3.45853e-12	STB-1	AC002463.1
KLHL28	1.11123e-16	0.381418	0.52	0.485	3.4835e-12	STB-1	KLHL28
FRA10AC1	1.12996e-16	0.516201	0.254	0.204	3.54218e-12	STB-1	FRA10AC1
AC015971.1	1.25904e-16	0.535963	0.27	0.219	3.94683e-12	STB-1	AC015971.1
SCLT1	1.26263e-16	0.558037	0.293	0.245	3.95808e-12	STB-1	SCLT1
CPSF6	1.26487e-16	0.34039	0.567	0.547	3.96512e-12	STB-1	CPSF6
HERC3	1.40311e-16	0.256506	0.746	0.723	4.39847e-12	STB-1	HERC3
VAPB	1.44828e-16	0.278691	0.567	0.529	4.54005e-12	STB-1	VAPB
MXI1	1.49718e-16	0.552286	0.331	0.282	4.69335e-12	STB-1	MXI1
KDM3A	1.57084e-16	0.411528	0.486	0.444	4.92427e-12	STB-1	KDM3A
OCIAD1	1.5884e-16	0.290601	0.659	0.647	4.97932e-12	STB-1	OCIAD1
MTG2	1.59002e-16	0.339691	0.493	0.449	4.98441e-12	STB-1	MTG2
REPS1	1.63126e-16	0.276483	0.626	0.606	5.11368e-12	STB-1	REPS1
FAF2	1.64636e-16	0.323153	0.583	0.558	5.16101e-12	STB-1	FAF2
RIPK1	1.65619e-16	0.288128	0.625	0.597	5.19182e-12	STB-1	RIPK1
MAP4K4	1.67975e-16	0.423417	0.502	0.469	5.26569e-12	STB-1	MAP4K4
TPTE	1.7644e-16	0.473991	0.342	0.293	5.53104e-12	STB-1	TPTE
ZNF644	1.83057e-16	0.388493	0.492	0.454	5.73846e-12	STB-1	ZNF644
SNX3	1.84225e-16	0.369553	0.49	0.451	5.7751e-12	STB-1	SNX3
TMEM167A	1.84275e-16	0.268854	0.673	0.651	5.77664e-12	STB-1	TMEM167A
ST13	2.03869e-16	0.304519	0.565	0.531	6.3909e-12	STB-1	ST13
CBL	2.13027e-16	0.409143	0.319	0.265	6.67797e-12	STB-1	CBL
UBXN2B	2.15612e-16	0.449942	0.376	0.332	6.75902e-12	STB-1	UBXN2B
STX3	2.18139e-16	0.277185	0.657	0.636	6.83821e-12	STB-1	STX3
SLC44A2	2.50675e-16	0.310174	0.611	0.582	7.85815e-12	STB-1	SLC44A2
METAP1	2.5627e-16	0.423056	0.348	0.298	8.03354e-12	STB-1	METAP1
RRAGC	2.80107e-16	0.468233	0.379	0.328	8.78079e-12	STB-1	RRAGC
DNTTIP2	2.85886e-16	0.358297	0.396	0.344	8.96195e-12	STB-1	DNTTIP2
ITPRID2	2.99026e-16	0.314727	0.781	0.76	9.37387e-12	STB-1	ITPRID2
COX16	3.0056e-16	0.520912	0.281	0.232	9.42194e-12	STB-1	COX16
RAB14	3.03974e-16	0.285518	0.61	0.582	9.52899e-12	STB-1	RAB14
MEST	3.15576e-16	0.398458	0.503	0.466	9.89269e-12	STB-1	MEST
GCA	3.22447e-16	0.508097	0.28	0.231	1.01081e-11	STB-1	GCA
PLD3	3.69718e-16	0.354169	0.616	0.597	1.15899e-11	STB-1	PLD3
GOLPH3L	3.69888e-16	0.550142	0.288	0.24	1.15953e-11	STB-1	GOLPH3L
PRPF38B	3.78996e-16	0.307572	0.541	0.506	1.18808e-11	STB-1	PRPF38B
MT-ND5	3.92474e-16	0.268339	0.897	0.895	1.23033e-11	STB-1	MT-ND5
ZNF529	4.00349e-16	0.506676	0.285	0.238	1.25501e-11	STB-1	ZNF529
ZNF600	4.0527e-16	0.390754	0.572	0.538	1.27044e-11	STB-1	ZNF600
B4GALT4	4.07118e-16	0.476626	0.283	0.233	1.27623e-11	STB-1	B4GALT4
ERCC6L2	4.11772e-16	0.560234	0.289	0.244	1.29082e-11	STB-1	ERCC6L2
NET1	4.21245e-16	0.441704	0.328	0.277	1.32052e-11	STB-1	NET1
C9orf153	4.21317e-16	0.549102	0.263	0.213	1.32074e-11	STB-1	C9orf153
NEDD4	4.33855e-16	0.317895	0.589	0.562	1.36005e-11	STB-1	NEDD4
FCHSD2	4.84533e-16	0.446258	0.645	0.639	1.51891e-11	STB-1	FCHSD2
GPI	5.07677e-16	0.557076	0.423	0.384	1.59147e-11	STB-1	GPI
OTULIN	5.28317e-16	0.338944	0.429	0.38	1.65617e-11	STB-1	OTULIN
RPS27L	5.98186e-16	0.306546	0.695	0.677	1.87519e-11	STB-1	RPS27L
PSMC6	6.18307e-16	0.275909	0.635	0.609	1.93827e-11	STB-1	PSMC6
C2CD2	6.29883e-16	0.285208	0.595	0.562	1.97456e-11	STB-1	C2CD2
ATXN7L1	6.46941e-16	0.327768	0.518	0.485	2.02803e-11	STB-1	ATXN7L1
BDP1	6.76391e-16	0.320297	0.615	0.601	2.12035e-11	STB-1	BDP1
C11orf54	6.88564e-16	0.384609	0.457	0.415	2.15851e-11	STB-1	C11orf54
LONP1	7.39757e-16	0.257616	0.681	0.655	2.31899e-11	STB-1	LONP1
PHF20L1	7.43451e-16	0.41519	0.412	0.368	2.33057e-11	STB-1	PHF20L1
ATXN10	7.47581e-16	0.585988	0.265	0.219	2.34352e-11	STB-1	ATXN10
BRWD3	7.68807e-16	0.428267	0.406	0.361	2.41006e-11	STB-1	BRWD3
KRR1	8.10969e-16	0.487438	0.346	0.301	2.54223e-11	STB-1	KRR1
SLC36A4	8.49453e-16	0.318081	0.586	0.564	2.66286e-11	STB-1	SLC36A4
TENT4A	8.71457e-16	0.345788	0.452	0.409	2.73184e-11	STB-1	TENT4A
MED23	8.76247e-16	0.421319	0.372	0.326	2.74686e-11	STB-1	MED23
MTERF4	8.78974e-16	0.465326	0.291	0.243	2.75541e-11	STB-1	MTERF4
CEBPD	9.34922e-16	0.386953	0.485	0.44	2.93079e-11	STB-1	CEBPD
HDAC8	9.44232e-16	0.332794	0.624	0.613	2.95998e-11	STB-1	HDAC8
PRKCA	1.05465e-15	0.459085	0.508	0.473	3.30611e-11	STB-1	PRKCA
NDUFA10	1.0638e-15	0.321318	0.542	0.51	3.33481e-11	STB-1	NDUFA10
METAP2	1.07635e-15	0.33682	0.514	0.473	3.37414e-11	STB-1	METAP2
NAA15	1.11348e-15	0.250011	0.719	0.718	3.49053e-11	STB-1	NAA15
ST7	1.13808e-15	0.437554	0.354	0.309	3.56767e-11	STB-1	ST7
UNK	1.1884e-15	0.348264	0.539	0.504	3.7254e-11	STB-1	UNK
SEPTIN11	1.25198e-15	0.501965	0.303	0.257	3.9247e-11	STB-1	SEPTIN11
ABHD5	1.29103e-15	0.38315	0.585	0.554	4.04712e-11	STB-1	ABHD5
WNK1	1.33366e-15	0.310544	0.615	0.599	4.18077e-11	STB-1	WNK1
PREP	1.3929e-15	0.353409	0.626	0.601	4.36648e-11	STB-1	PREP
MED4	1.48529e-15	0.251159	0.565	0.523	4.6561e-11	STB-1	MED4
SENP2	1.54163e-15	0.289399	0.574	0.54	4.83269e-11	STB-1	SENP2
YLPM1	1.54956e-15	0.321993	0.552	0.529	4.85756e-11	STB-1	YLPM1
ABHD17B	1.89425e-15	0.395639	0.425	0.377	5.93808e-11	STB-1	ABHD17B
CCNG1	1.91347e-15	0.532668	0.28	0.233	5.99835e-11	STB-1	CCNG1
MSH3	1.91776e-15	0.316696	0.551	0.523	6.0118e-11	STB-1	MSH3
C19orf12	2.09774e-15	0.516147	0.253	0.205	6.576e-11	STB-1	C19orf12
SIRT2	2.26459e-15	0.434599	0.333	0.283	7.09905e-11	STB-1	SIRT2
KIAA0040	2.32404e-15	0.400526	0.465	0.422	7.2854e-11	STB-1	KIAA0040
ZNF451-AS1	2.33449e-15	0.445133	0.419	0.377	7.31817e-11	STB-1	ZNF451-AS1
AC104389.5	2.33913e-15	0.301838	0.619	0.594	7.33271e-11	STB-1	AC104389.5
SRP54	2.34145e-15	0.263715	0.703	0.69	7.33997e-11	STB-1	SRP54
UBN1	2.81411e-15	0.314302	0.53	0.496	8.82168e-11	STB-1	UBN1
CSNK1G1	2.84352e-15	0.27723	0.637	0.618	8.91387e-11	STB-1	CSNK1G1
ZC3H18	2.93552e-15	0.294651	0.501	0.457	9.20227e-11	STB-1	ZC3H18
POLH	3.0797e-15	0.581938	0.272	0.227	9.65424e-11	STB-1	POLH
ZDHHC7	3.25914e-15	0.409679	0.323	0.273	1.02168e-10	STB-1	ZDHHC7
HEATR1	3.30007e-15	0.439023	0.411	0.371	1.03451e-10	STB-1	HEATR1
ST7-AS2	3.55338e-15	0.459781	0.272	0.224	1.11391e-10	STB-1	ST7-AS2
SUMO1	3.58174e-15	0.321963	0.473	0.425	1.1228e-10	STB-1	SUMO1
COX20	3.71624e-15	0.313737	0.496	0.451	1.16497e-10	STB-1	COX20
RAB9A	3.82631e-15	0.316651	0.508	0.465	1.19947e-10	STB-1	RAB9A
CLYBL	3.8942e-15	0.485384	0.305	0.257	1.22075e-10	STB-1	CLYBL
EYA3	3.9875e-15	0.257572	0.624	0.609	1.25e-10	STB-1	EYA3
USPL1	3.99498e-15	0.44784	0.336	0.29	1.25235e-10	STB-1	USPL1
TGOLN2	4.87429e-15	0.282324	0.573	0.536	1.52799e-10	STB-1	TGOLN2
CREG1	5.00311e-15	0.411643	0.354	0.306	1.56837e-10	STB-1	CREG1
STX17-AS1	5.16196e-15	0.460553	0.255	0.207	1.61817e-10	STB-1	STX17-AS1
BOD1L1	5.30099e-15	0.277059	0.617	0.594	1.66175e-10	STB-1	BOD1L1
AL713852.1	5.44773e-15	0.485175	0.349	0.304	1.70775e-10	STB-1	AL713852.1
AC073343.2	5.71148e-15	0.459487	0.382	0.337	1.79043e-10	STB-1	AC073343.2
BLCAP	5.74529e-15	0.367801	0.512	0.476	1.80103e-10	STB-1	BLCAP
PPIL4	5.74844e-15	0.332986	0.476	0.434	1.80202e-10	STB-1	PPIL4
RMC1	5.75856e-15	0.482259	0.306	0.258	1.80519e-10	STB-1	RMC1
PHRF1	5.82549e-15	0.352719	0.48	0.44	1.82618e-10	STB-1	PHRF1
HSDL1	6.00053e-15	0.447596	0.251	0.202	1.88105e-10	STB-1	HSDL1
PTCD1	6.47873e-15	0.445921	0.417	0.376	2.03095e-10	STB-1	PTCD1
FBXO28	6.56628e-15	0.270522	0.682	0.673	2.0584e-10	STB-1	FBXO28
AEN	6.59598e-15	0.490761	0.314	0.267	2.06771e-10	STB-1	AEN
BARD1	6.62637e-15	0.452557	0.304	0.257	2.07723e-10	STB-1	BARD1
ETV6	6.77263e-15	0.585863	0.304	0.26	2.12309e-10	STB-1	ETV6
VPS37C	6.88341e-15	0.402392	0.359	0.315	2.15781e-10	STB-1	VPS37C
GTF2B	6.98209e-15	0.354332	0.485	0.445	2.18874e-10	STB-1	GTF2B
LINC01619	7.03424e-15	1.32231	0.609	0.614	2.20509e-10	STB-1	LINC01619
ERVH48-1	7.11778e-15	0.529113	0.467	0.435	2.23128e-10	STB-1	ERVH48-1
CHMP1A	8.23041e-15	0.433127	0.266	0.217	2.58007e-10	STB-1	CHMP1A
LINC00278	8.2972e-15	0.508474	0.336	0.296	2.60101e-10	STB-1	LINC00278
AC010894.3	8.41133e-15	0.588488	0.256	0.212	2.63678e-10	STB-1	AC010894.3
EXOC6	8.6385e-15	0.335632	0.571	0.552	2.708e-10	STB-1	EXOC6
HACL1	9.12612e-15	0.436904	0.309	0.26	2.86086e-10	STB-1	HACL1
ZSWIM8	9.84003e-15	0.294581	0.611	0.582	3.08465e-10	STB-1	ZSWIM8
HGS	1.04366e-14	0.372372	0.453	0.409	3.27166e-10	STB-1	HGS
SMARCA1	1.05126e-14	0.46826	0.322	0.276	3.2955e-10	STB-1	SMARCA1
PLPP3	1.06672e-14	0.345668	0.423	0.379	3.34395e-10	STB-1	PLPP3
U2AF2	1.10165e-14	0.311458	0.506	0.465	3.45347e-10	STB-1	U2AF2
ATP6V1E1	1.18142e-14	0.260567	0.601	0.568	3.70351e-10	STB-1	ATP6V1E1
TMEM184C	1.20449e-14	0.507499	0.272	0.226	3.77585e-10	STB-1	TMEM184C
MTCH1	1.22301e-14	0.381392	0.439	0.397	3.83389e-10	STB-1	MTCH1
AC005480.1	1.25637e-14	0.357184	0.439	0.395	3.93848e-10	STB-1	AC005480.1
RAB18	1.28748e-14	0.259177	0.618	0.594	4.03601e-10	STB-1	RAB18
HMGCL	1.30071e-14	0.416821	0.319	0.271	4.07748e-10	STB-1	HMGCL
EMC3	1.328e-14	0.343992	0.441	0.397	4.16302e-10	STB-1	EMC3
ADPRHL2	1.37761e-14	0.438294	0.288	0.24	4.31852e-10	STB-1	ADPRHL2
NOTCH3	1.39495e-14	0.498342	0.263	0.217	4.37288e-10	STB-1	NOTCH3
NELFCD	1.42161e-14	0.339383	0.507	0.47	4.45645e-10	STB-1	NELFCD
SSBP3	1.43628e-14	0.565057	0.333	0.292	4.50246e-10	STB-1	SSBP3
WBP11	1.4757e-14	0.369685	0.392	0.345	4.62601e-10	STB-1	WBP11
SLC13A4	1.48877e-14	0.314003	0.478	0.435	4.66701e-10	STB-1	SLC13A4
KLHL36	1.50453e-14	0.461009	0.268	0.221	4.71641e-10	STB-1	KLHL36
ANKFY1	1.85537e-14	0.338538	0.486	0.448	5.81623e-10	STB-1	ANKFY1
REXO1	1.90461e-14	0.375115	0.374	0.325	5.97058e-10	STB-1	REXO1
TACSTD2	1.93173e-14	0.554292	0.298	0.254	6.0556e-10	STB-1	TACSTD2
TSTD3	2.04163e-14	0.282624	0.665	0.65	6.40011e-10	STB-1	TSTD3
AMDHD2	2.14057e-14	0.407325	0.378	0.331	6.71027e-10	STB-1	AMDHD2
ARHGAP27	2.28175e-14	0.391334	0.399	0.354	7.15282e-10	STB-1	ARHGAP27
AATF	2.34037e-14	0.291317	0.61	0.593	7.33661e-10	STB-1	AATF
GAS5	2.40765e-14	0.296929	0.607	0.583	7.5475e-10	STB-1	GAS5
PSMD13	2.4887e-14	0.378506	0.439	0.398	7.80157e-10	STB-1	PSMD13
MRPS31	2.54381e-14	0.381571	0.463	0.43	7.97434e-10	STB-1	MRPS31
URM1	2.56227e-14	0.399042	0.405	0.361	8.03222e-10	STB-1	URM1
ALG13-AS1	2.57573e-14	0.607009	0.296	0.254	8.07439e-10	STB-1	ALG13-AS1
CEP57	2.63544e-14	0.359353	0.465	0.425	8.26158e-10	STB-1	CEP57
SRSF1	2.91098e-14	0.268518	0.596	0.569	9.12534e-10	STB-1	SRSF1
AC003681.1	3.06262e-14	0.461433	0.305	0.259	9.60071e-10	STB-1	AC003681.1
CLK4	3.30054e-14	0.435093	0.325	0.278	1.03465e-09	STB-1	CLK4
TXNL1	3.33116e-14	0.290294	0.533	0.498	1.04425e-09	STB-1	TXNL1
AP005230.1	3.45349e-14	0.553933	0.367	0.326	1.0826e-09	STB-1	AP005230.1
NGDN	3.59393e-14	0.399974	0.386	0.343	1.12662e-09	STB-1	NGDN
HPS4	3.75421e-14	0.479122	0.366	0.325	1.17687e-09	STB-1	HPS4
RORA	3.83315e-14	0.418352	0.343	0.297	1.20162e-09	STB-1	RORA
KLHL20	3.84444e-14	0.401603	0.406	0.368	1.20516e-09	STB-1	KLHL20
DSC3	3.92282e-14	0.428214	0.301	0.254	1.22972e-09	STB-1	DSC3
CTNNBL1	3.94584e-14	0.283301	0.583	0.562	1.23694e-09	STB-1	CTNNBL1
ZNF330	4.03001e-14	0.409196	0.314	0.268	1.26333e-09	STB-1	ZNF330
KLHL7	4.03244e-14	0.448049	0.357	0.317	1.26409e-09	STB-1	KLHL7
ZNF800	4.52655e-14	0.289953	0.61	0.602	1.41898e-09	STB-1	ZNF800
FBXO7	4.6348e-14	0.356997	0.417	0.375	1.45292e-09	STB-1	FBXO7
FBXO25	4.82431e-14	0.346678	0.649	0.621	1.51233e-09	STB-1	FBXO25
UBA6-AS1	4.89091e-14	0.545312	0.314	0.271	1.5332e-09	STB-1	UBA6-AS1
ATP6V1D	4.9994e-14	0.33439	0.475	0.436	1.56721e-09	STB-1	ATP6V1D
PPP4C	5.0361e-14	0.37294	0.374	0.329	1.57872e-09	STB-1	PPP4C
ZNF766	5.29614e-14	0.425455	0.311	0.265	1.66024e-09	STB-1	ZNF766
STAM2	5.44316e-14	0.286123	0.56	0.532	1.70632e-09	STB-1	STAM2
FAM104A	5.51329e-14	0.332886	0.485	0.451	1.72831e-09	STB-1	FAM104A
CLASRP	5.62902e-14	0.264855	0.599	0.575	1.76458e-09	STB-1	CLASRP
ZFYVE27	5.74338e-14	0.309581	0.488	0.447	1.80043e-09	STB-1	ZFYVE27
ATF2	6.10991e-14	0.48908	0.315	0.273	1.91533e-09	STB-1	ATF2
AC114930.1	6.34136e-14	0.757936	0.272	0.232	1.98789e-09	STB-1	AC114930.1
SKAP2	6.38243e-14	0.366613	0.489	0.455	2.00077e-09	STB-1	SKAP2
OMG	6.40375e-14	0.48283	0.309	0.265	2.00745e-09	STB-1	OMG
APC	6.47873e-14	0.383521	0.419	0.38	2.03095e-09	STB-1	APC
PTBP1	6.55368e-14	0.281464	0.661	0.645	2.05445e-09	STB-1	PTBP1
NFRKB	6.5758e-14	0.403828	0.387	0.342	2.06138e-09	STB-1	NFRKB
SLC18B1	6.89667e-14	0.522281	0.384	0.35	2.16197e-09	STB-1	SLC18B1
C1D	7.01629e-14	0.398948	0.388	0.344	2.19947e-09	STB-1	C1D
NSUN6	7.10883e-14	0.448123	0.446	0.411	2.22848e-09	STB-1	NSUN6
SIK2	7.47349e-14	0.439037	0.345	0.301	2.34279e-09	STB-1	SIK2
STAT1	7.6966e-14	0.286833	0.296	0.249	2.41273e-09	STB-1	STAT1
CNOT11	7.71999e-14	0.333938	0.432	0.386	2.42006e-09	STB-1	CNOT11
UEVLD	8.27435e-14	0.325061	0.451	0.412	2.59384e-09	STB-1	UEVLD
CDKN1A	8.3864e-14	0.440427	0.543	0.511	2.62897e-09	STB-1	CDKN1A
KDM5C	8.46256e-14	0.363499	0.401	0.354	2.65284e-09	STB-1	KDM5C
TCF7	8.50481e-14	0.436042	0.338	0.292	2.66609e-09	STB-1	TCF7
TMEM87B	9.11617e-14	0.327557	0.546	0.519	2.85774e-09	STB-1	TMEM87B
PGGT1B	9.58935e-14	0.544487	0.259	0.217	3.00607e-09	STB-1	PGGT1B
CCZ1	9.66488e-14	0.426948	0.303	0.258	3.02975e-09	STB-1	CCZ1
THUMPD1	9.95252e-14	0.4013	0.326	0.28	3.11992e-09	STB-1	THUMPD1
STMP1	1.06964e-13	0.317019	0.523	0.489	3.35312e-09	STB-1	STMP1
CBR4	1.10069e-13	0.43937	0.393	0.354	3.45044e-09	STB-1	CBR4
ZNF397	1.12444e-13	0.521589	0.257	0.213	3.52491e-09	STB-1	ZNF397
AL354696.2	1.15161e-13	0.465969	0.298	0.253	3.61007e-09	STB-1	AL354696.2
KDM5A	1.1538e-13	0.263363	0.63	0.616	3.61693e-09	STB-1	KDM5A
RNF103	1.17992e-13	0.426953	0.356	0.31	3.69881e-09	STB-1	RNF103
RAD23A	1.18261e-13	0.303115	0.485	0.441	3.70725e-09	STB-1	RAD23A
ARPP19	1.21259e-13	0.286153	0.56	0.529	3.80124e-09	STB-1	ARPP19
BSDC1	1.21733e-13	0.275984	0.554	0.522	3.8161e-09	STB-1	BSDC1
GGA3	1.22439e-13	0.355558	0.473	0.433	3.83821e-09	STB-1	GGA3
CNOT8	1.36862e-13	0.42094	0.319	0.273	4.29035e-09	STB-1	CNOT8
ANXA7	1.3863e-13	0.393835	0.374	0.332	4.34578e-09	STB-1	ANXA7
PNN	1.46403e-13	0.252271	0.629	0.608	4.58945e-09	STB-1	PNN
TMPO	1.46631e-13	0.404877	0.326	0.281	4.59658e-09	STB-1	TMPO
MYCBP	1.46668e-13	0.446877	0.318	0.271	4.59776e-09	STB-1	MYCBP
INTS8	1.50191e-13	0.412562	0.392	0.352	4.7082e-09	STB-1	INTS8
NEU1	1.58466e-13	0.493085	0.39	0.352	4.96759e-09	STB-1	NEU1
RAB4A	1.62948e-13	0.481905	0.294	0.25	5.10809e-09	STB-1	RAB4A
NDC1	1.66264e-13	0.409252	0.261	0.215	5.21205e-09	STB-1	NDC1
TNFRSF21	1.66697e-13	0.360369	0.319	0.274	5.22561e-09	STB-1	TNFRSF21
CRKL	1.68893e-13	0.304643	0.523	0.487	5.29445e-09	STB-1	CRKL
TP53BP2	1.79892e-13	0.306341	0.454	0.412	5.63927e-09	STB-1	TP53BP2
NISCH	1.86509e-13	0.494882	0.251	0.208	5.84667e-09	STB-1	NISCH
CALCOCO1	1.91093e-13	0.358003	0.507	0.468	5.99038e-09	STB-1	CALCOCO1
TUBGCP2	1.92319e-13	0.296497	0.543	0.513	6.02881e-09	STB-1	TUBGCP2
DLST	1.99021e-13	0.299173	0.531	0.503	6.2389e-09	STB-1	DLST
TMEM222	2.03956e-13	0.385354	0.333	0.287	6.3936e-09	STB-1	TMEM222
RAD21	2.04646e-13	0.271747	0.635	0.618	6.41526e-09	STB-1	RAD21
HMG20A	2.10976e-13	0.354526	0.402	0.362	6.61366e-09	STB-1	HMG20A
TRIT1	2.20879e-13	0.422237	0.346	0.305	6.92412e-09	STB-1	TRIT1
VPS50	2.2427e-13	0.357277	0.46	0.431	7.03041e-09	STB-1	VPS50
RPRD1B	2.25793e-13	0.331243	0.572	0.552	7.07817e-09	STB-1	RPRD1B
ANAPC16	2.29667e-13	0.406423	0.427	0.391	7.19959e-09	STB-1	ANAPC16
HSPB11	2.32257e-13	0.395052	0.292	0.245	7.28081e-09	STB-1	HSPB11
ZNF626	2.4887e-13	0.319803	0.287	0.24	7.80159e-09	STB-1	ZNF626
GRTP1	2.5136e-13	0.399474	0.405	0.366	7.87962e-09	STB-1	GRTP1
UPF3A	2.664e-13	0.323866	0.546	0.517	8.3511e-09	STB-1	UPF3A
TBC1D32	2.8883e-13	0.574407	0.348	0.315	9.05423e-09	STB-1	TBC1D32
PABPC1L	2.90637e-13	0.410689	0.358	0.316	9.11088e-09	STB-1	PABPC1L
SLC35B3	3.06558e-13	0.382209	0.406	0.365	9.60998e-09	STB-1	SLC35B3
ANKRD10	3.19037e-13	0.266575	0.884	0.868	1.00012e-08	STB-1	ANKRD10
CYSTM1	3.24716e-13	0.349195	0.502	0.472	1.01792e-08	STB-1	CYSTM1
NR1D2	3.53798e-13	0.320468	0.501	0.47	1.10909e-08	STB-1	NR1D2
VAMP3	3.5806e-13	0.467997	0.277	0.234	1.12245e-08	STB-1	VAMP3
MTIF3	3.86666e-13	0.359158	0.407	0.366	1.21212e-08	STB-1	MTIF3
RMDN1	4.29965e-13	0.380943	0.428	0.391	1.34785e-08	STB-1	RMDN1
CEP63	4.40275e-13	0.458749	0.343	0.303	1.38018e-08	STB-1	CEP63
NFKB1	4.48843e-13	0.305556	0.483	0.446	1.40703e-08	STB-1	NFKB1
RBBP7	4.53636e-13	0.294817	0.552	0.522	1.42206e-08	STB-1	RBBP7
WDR11	4.80542e-13	0.418115	0.394	0.36	1.5064e-08	STB-1	WDR11
DNAJC13	4.88271e-13	0.28028	0.592	0.571	1.53063e-08	STB-1	DNAJC13
CCM2	4.94588e-13	0.400549	0.338	0.292	1.55043e-08	STB-1	CCM2
FLCN	5.60954e-13	0.278057	0.56	0.523	1.75848e-08	STB-1	FLCN
TAF4	5.69513e-13	0.325669	0.534	0.505	1.78531e-08	STB-1	TAF4
FAM120B	6.17955e-13	0.272837	0.646	0.642	1.93716e-08	STB-1	FAM120B
AL162253.2	6.30371e-13	0.449334	0.265	0.222	1.97609e-08	STB-1	AL162253.2
CCDC91	6.39673e-13	0.38838	0.44	0.406	2.00525e-08	STB-1	CCDC91
FDPS	6.59455e-13	0.343569	0.769	0.767	2.06726e-08	STB-1	FDPS
RFX7	6.85288e-13	0.423181	0.424	0.39	2.14824e-08	STB-1	RFX7
WDR48	6.92575e-13	0.387183	0.376	0.335	2.17108e-08	STB-1	WDR48
BRAP	6.94373e-13	0.383592	0.4	0.36	2.17672e-08	STB-1	BRAP
SLC4A7	7.18708e-13	0.415769	0.509	0.481	2.25301e-08	STB-1	SLC4A7
SMC6	7.46463e-13	0.385708	0.462	0.435	2.34001e-08	STB-1	SMC6
PRPF8	7.891e-13	0.269751	0.592	0.567	2.47367e-08	STB-1	PRPF8
CLDND1	8.12959e-13	0.410323	0.33	0.289	2.54847e-08	STB-1	CLDND1
ZMYM6	8.37436e-13	0.38468	0.356	0.316	2.62519e-08	STB-1	ZMYM6
EAPP	8.37472e-13	0.324466	0.493	0.46	2.62531e-08	STB-1	EAPP
PRMT9	8.55396e-13	0.42018	0.378	0.339	2.68149e-08	STB-1	PRMT9
DCAF10	8.76356e-13	0.271275	0.578	0.555	2.7472e-08	STB-1	DCAF10
SUPT16H	9.16678e-13	0.305031	0.488	0.453	2.8736e-08	STB-1	SUPT16H
PSMD8	9.87782e-13	0.260961	0.521	0.483	3.0965e-08	STB-1	PSMD8
TMTC2	9.90252e-13	0.476783	0.36	0.322	3.10424e-08	STB-1	TMTC2
DNA2	1.16384e-12	0.390899	0.415	0.372	3.64842e-08	STB-1	DNA2
PUM3	1.19725e-12	0.301258	0.647	0.639	3.75315e-08	STB-1	PUM3
SNX4	1.29573e-12	0.31792	0.493	0.462	4.06186e-08	STB-1	SNX4
FASTKD2	1.35751e-12	0.310479	0.496	0.463	4.25552e-08	STB-1	FASTKD2
FAM53C	1.36765e-12	0.303044	0.5	0.465	4.2873e-08	STB-1	FAM53C
ZNF551	1.36781e-12	0.459818	0.288	0.246	4.2878e-08	STB-1	ZNF551
RNF34	1.37933e-12	0.384878	0.457	0.426	4.32391e-08	STB-1	RNF34
DR1	1.38745e-12	0.323209	0.425	0.384	4.34939e-08	STB-1	DR1
AC006059.1	1.40844e-12	0.376031	0.458	0.423	4.41519e-08	STB-1	AC006059.1
NAA50	1.43758e-12	0.27364	0.58	0.56	4.50654e-08	STB-1	NAA50
CCDC18	1.45549e-12	0.509277	0.403	0.369	4.56267e-08	STB-1	CCDC18
SC5D	1.53732e-12	0.396317	0.278	0.232	4.81919e-08	STB-1	SC5D
MCM7	1.54851e-12	0.433542	0.265	0.221	4.85427e-08	STB-1	MCM7
TCF20	1.60842e-12	0.288503	0.541	0.516	5.04208e-08	STB-1	TCF20
CPM	1.6833e-12	0.590471	0.787	0.789	5.2768e-08	STB-1	CPM
RFC1	1.69671e-12	0.261278	0.602	0.585	5.31886e-08	STB-1	RFC1
PLEKHM3	1.75572e-12	0.497659	0.251	0.21	5.50384e-08	STB-1	PLEKHM3
ZNF720	1.75733e-12	0.346012	0.471	0.441	5.50888e-08	STB-1	ZNF720
NOC2L	1.80966e-12	0.398202	0.406	0.366	5.67291e-08	STB-1	NOC2L
PHYKPL	1.81585e-12	0.322469	0.446	0.409	5.69232e-08	STB-1	PHYKPL
POM121C	1.89303e-12	0.324372	0.438	0.4	5.93428e-08	STB-1	POM121C
CTDP1	1.90464e-12	0.281232	0.519	0.49	5.97066e-08	STB-1	CTDP1
POM121	1.94735e-12	0.289683	0.544	0.518	6.10456e-08	STB-1	POM121
ZNF224	2.28881e-12	0.386353	0.325	0.282	7.17495e-08	STB-1	ZNF224
PSME4	2.47325e-12	0.254065	0.716	0.713	7.75315e-08	STB-1	PSME4
B3GALNT2	2.47964e-12	0.326282	0.455	0.417	7.77319e-08	STB-1	B3GALNT2
AP5Z1	2.60025e-12	0.326171	0.508	0.475	8.15128e-08	STB-1	AP5Z1
CPSF3	2.68479e-12	0.378801	0.338	0.297	8.41627e-08	STB-1	CPSF3
PRDM4	2.80072e-12	0.417131	0.274	0.23	8.7797e-08	STB-1	PRDM4
PEX6	2.83433e-12	0.416787	0.292	0.251	8.88507e-08	STB-1	PEX6
ZCCHC4	2.90633e-12	0.445926	0.279	0.238	9.11075e-08	STB-1	ZCCHC4
LRP2BP	2.96291e-12	0.367806	0.271	0.226	9.28812e-08	STB-1	LRP2BP
GGA2	2.97479e-12	0.335843	0.467	0.437	9.32536e-08	STB-1	GGA2
P2RX4	3.28452e-12	0.306462	0.483	0.451	1.02963e-07	STB-1	P2RX4
ORC3	3.44418e-12	0.449047	0.374	0.339	1.07968e-07	STB-1	ORC3
GALE	3.59318e-12	0.423148	0.397	0.358	1.12639e-07	STB-1	GALE
UBA5	3.62239e-12	0.472483	0.334	0.296	1.13555e-07	STB-1	UBA5
ITGA6	3.66328e-12	0.452077	0.414	0.381	1.14837e-07	STB-1	ITGA6
SPATS2L	3.77271e-12	0.493386	0.256	0.216	1.18267e-07	STB-1	SPATS2L
AKT2	3.85115e-12	0.343741	0.4	0.359	1.20726e-07	STB-1	AKT2
AL135878.1	3.95139e-12	0.269227	0.527	0.498	1.23868e-07	STB-1	AL135878.1
SMC1A	4.0902e-12	0.272964	0.536	0.507	1.2822e-07	STB-1	SMC1A
SIRT7	4.42421e-12	0.269188	0.599	0.571	1.3869e-07	STB-1	SIRT7
LINC00472	4.48003e-12	0.324737	0.371	0.329	1.4044e-07	STB-1	LINC00472
BROX	4.93857e-12	0.352064	0.411	0.372	1.54814e-07	STB-1	BROX
ZNF791	4.95575e-12	0.324709	0.486	0.45	1.55353e-07	STB-1	ZNF791
UBE2I	5.06381e-12	0.302812	0.482	0.445	1.5874e-07	STB-1	UBE2I
ZC3H8	5.17307e-12	0.449857	0.259	0.218	1.62165e-07	STB-1	ZC3H8
SCAMP1	5.27251e-12	0.447517	0.292	0.253	1.65283e-07	STB-1	SCAMP1
AAMDC	5.30302e-12	0.497236	0.266	0.226	1.66239e-07	STB-1	AAMDC
NDUFAF7	5.41893e-12	0.382754	0.301	0.257	1.69873e-07	STB-1	NDUFAF7
NAA35	5.45456e-12	0.271479	0.604	0.588	1.7099e-07	STB-1	NAA35
HMGN1	5.55616e-12	0.280515	0.622	0.603	1.74174e-07	STB-1	HMGN1
NUB1	5.56918e-12	0.358053	0.375	0.333	1.74583e-07	STB-1	NUB1
ACO2	5.6186e-12	0.255335	0.584	0.563	1.76132e-07	STB-1	ACO2
NPHP3	5.70328e-12	0.426022	0.308	0.267	1.78787e-07	STB-1	NPHP3
CEP192	5.8226e-12	0.395619	0.436	0.406	1.82527e-07	STB-1	CEP192
FOPNL	5.96819e-12	0.388533	0.294	0.252	1.87091e-07	STB-1	FOPNL
AC107419.1	6.03997e-12	0.462114	0.332	0.294	1.89341e-07	STB-1	AC107419.1
TRIP10	6.38715e-12	0.411845	0.268	0.227	2.00224e-07	STB-1	TRIP10
SNHG16	6.42259e-12	0.316465	0.467	0.433	2.01335e-07	STB-1	SNHG16
NUP43	6.4243e-12	0.37628	0.299	0.256	2.01389e-07	STB-1	NUP43
DLEU2	6.78889e-12	0.290118	0.565	0.545	2.12818e-07	STB-1	DLEU2
CPSF7	6.85986e-12	0.268686	0.531	0.5	2.15043e-07	STB-1	CPSF7
PSMC2	6.93261e-12	0.353437	0.354	0.313	2.17323e-07	STB-1	PSMC2
CDK6	6.9575e-12	0.496801	0.264	0.224	2.18104e-07	STB-1	CDK6
POLR2B	6.98985e-12	0.264295	0.588	0.562	2.19118e-07	STB-1	POLR2B
MYO10	7.01167e-12	0.334295	0.474	0.44	2.19802e-07	STB-1	MYO10
BMS1	7.07728e-12	0.284432	0.474	0.439	2.21859e-07	STB-1	BMS1
NOL10	7.82482e-12	0.286693	0.574	0.556	2.45293e-07	STB-1	NOL10
CHIC2	8.0129e-12	0.275747	0.435	0.395	2.51188e-07	STB-1	CHIC2
AQR	8.36825e-12	0.31254	0.547	0.533	2.62328e-07	STB-1	AQR
RFX2	8.4035e-12	0.540416	0.335	0.299	2.63433e-07	STB-1	RFX2
BTBD1	8.51271e-12	0.401275	0.325	0.285	2.66856e-07	STB-1	BTBD1
PDCD10	8.70877e-12	0.293191	0.543	0.519	2.73002e-07	STB-1	PDCD10
SLC25A46	9.66352e-12	0.432604	0.278	0.238	3.02932e-07	STB-1	SLC25A46
CNDP2	9.70372e-12	0.367859	0.385	0.347	3.04192e-07	STB-1	CNDP2
RNPC3	1.00326e-11	0.343058	0.456	0.422	3.14502e-07	STB-1	RNPC3
MTX2	1.00995e-11	0.370196	0.461	0.439	3.16601e-07	STB-1	MTX2
NBPF12	1.01266e-11	0.299086	0.435	0.394	3.1745e-07	STB-1	NBPF12
ISM2	1.05711e-11	0.382127	0.473	0.441	3.31384e-07	STB-1	ISM2
TPI1	1.07794e-11	0.297289	0.596	0.568	3.37913e-07	STB-1	TPI1
NHLRC2	1.17706e-11	0.364692	0.384	0.348	3.68985e-07	STB-1	NHLRC2
ST8SIA6	1.20639e-11	0.364752	0.564	0.548	3.7818e-07	STB-1	ST8SIA6
MSX2	1.25101e-11	0.328906	0.434	0.396	3.92168e-07	STB-1	MSX2
SLC25A24	1.2693e-11	0.35151	0.346	0.307	3.97901e-07	STB-1	SLC25A24
PNKP	1.29509e-11	0.279647	0.628	0.62	4.05985e-07	STB-1	PNKP
DGKI	1.31804e-11	0.455482	0.357	0.431	4.13178e-07	STB-1	DGKI
DLGAP4	1.33967e-11	0.32217	0.498	0.47	4.19961e-07	STB-1	DLGAP4
POLR1C	1.35678e-11	0.361838	0.412	0.377	4.25322e-07	STB-1	POLR1C
AC018362.1	1.4462e-11	0.266512	0.545	0.51	4.53355e-07	STB-1	AC018362.1
MRPS10	1.49431e-11	0.39591	0.266	0.225	4.68437e-07	STB-1	MRPS10
ENAH	1.50522e-11	0.271045	0.665	0.662	4.71858e-07	STB-1	ENAH
UNC79	1.57635e-11	0.534794	0.262	0.224	4.94154e-07	STB-1	UNC79
API5	1.60397e-11	0.29313	0.532	0.512	5.02812e-07	STB-1	API5
AC139769.2	1.62905e-11	0.551212	0.279	0.243	5.10673e-07	STB-1	AC139769.2
IRS2	1.65638e-11	0.314932	0.413	0.374	5.19242e-07	STB-1	IRS2
LSG1	1.70188e-11	0.282357	0.478	0.44	5.33506e-07	STB-1	LSG1
WBP4	1.86135e-11	0.2824	0.437	0.397	5.83496e-07	STB-1	WBP4
GRN	1.87759e-11	0.254731	0.656	0.641	5.88587e-07	STB-1	GRN
SLIRP	2.00911e-11	0.269453	0.57	0.545	6.29815e-07	STB-1	SLIRP
CENPC	2.11443e-11	0.362579	0.418	0.388	6.62832e-07	STB-1	CENPC
GPS2	2.12707e-11	0.270839	0.561	0.532	6.66793e-07	STB-1	GPS2
GLE1	2.14078e-11	0.314001	0.416	0.382	6.71092e-07	STB-1	GLE1
BBIP1	2.23528e-11	0.406887	0.26	0.217	7.00714e-07	STB-1	BBIP1
TPM1	2.2803e-11	0.507427	0.367	0.333	7.14827e-07	STB-1	TPM1
FAM219A	2.36929e-11	0.275834	0.655	0.639	7.42726e-07	STB-1	FAM219A
CWC15	2.65217e-11	0.395917	0.302	0.26	8.31402e-07	STB-1	CWC15
CD99	2.68731e-11	0.33843	0.506	0.482	8.42418e-07	STB-1	CD99
GPATCH2	2.72485e-11	0.316213	0.579	0.567	8.54185e-07	STB-1	GPATCH2
PCBD2	2.78856e-11	0.398058	0.277	0.235	8.74159e-07	STB-1	PCBD2
EXOSC3	2.83568e-11	0.415756	0.252	0.212	8.88928e-07	STB-1	EXOSC3
SDHB	2.8746e-11	0.282539	0.486	0.454	9.01129e-07	STB-1	SDHB
PDZD8	2.90269e-11	0.403404	0.301	0.262	9.09935e-07	STB-1	PDZD8
DCUN1D2	2.90614e-11	0.3339	0.445	0.411	9.11015e-07	STB-1	DCUN1D2
ZNF24	3.03642e-11	0.256882	0.557	0.53	9.51858e-07	STB-1	ZNF24
DCAF5	3.03847e-11	0.409842	0.313	0.276	9.52499e-07	STB-1	DCAF5
CBWD5	3.09223e-11	0.443085	0.254	0.215	9.69352e-07	STB-1	CBWD5
VPS11	3.12639e-11	0.342125	0.321	0.279	9.80061e-07	STB-1	VPS11
ATAD2	3.22286e-11	0.398991	0.326	0.287	1.0103e-06	STB-1	ATAD2
VIRMA	3.28152e-11	0.287114	0.539	0.516	1.02869e-06	STB-1	VIRMA
ATMIN	3.35293e-11	0.358742	0.332	0.29	1.05107e-06	STB-1	ATMIN
AL359706.1	3.36654e-11	0.447599	0.278	0.239	1.05534e-06	STB-1	AL359706.1
ZNF490	3.36668e-11	0.405746	0.369	0.335	1.05539e-06	STB-1	ZNF490
AL357146.1	3.39475e-11	0.417727	0.253	0.213	1.06419e-06	STB-1	AL357146.1
MRS2	3.40265e-11	0.385548	0.301	0.259	1.06666e-06	STB-1	MRS2
SLC37A3	3.46131e-11	0.335184	0.455	0.426	1.08505e-06	STB-1	SLC37A3
YOD1	3.81268e-11	0.36121	0.287	0.246	1.1952e-06	STB-1	YOD1
MRPS5	4.01717e-11	0.490561	0.283	0.246	1.2593e-06	STB-1	MRPS5
BNIP3	4.0197e-11	0.402985	0.433	0.402	1.26009e-06	STB-1	BNIP3
SRSF9	4.23414e-11	0.267022	0.587	0.559	1.32732e-06	STB-1	SRSF9
RFC3	4.32693e-11	0.270724	0.602	0.581	1.35641e-06	STB-1	RFC3
CLCN3	4.63864e-11	0.256526	0.653	0.655	1.45412e-06	STB-1	CLCN3
ANKZF1	4.73905e-11	0.476694	0.275	0.238	1.4856e-06	STB-1	ANKZF1
STX18	4.92761e-11	0.256846	0.572	0.553	1.54471e-06	STB-1	STX18
PSIP1	4.97411e-11	0.372743	0.31	0.27	1.55928e-06	STB-1	PSIP1
LCORL	5.09578e-11	0.295708	0.569	0.559	1.59742e-06	STB-1	LCORL
EIF2B3	5.20037e-11	0.349453	0.254	0.217	1.63021e-06	STB-1	EIF2B3
AGPS	5.41979e-11	0.436357	0.301	0.266	1.699e-06	STB-1	AGPS
BRIX1	5.46087e-11	0.314607	0.345	0.304	1.71187e-06	STB-1	BRIX1
NECAP2	5.57256e-11	0.435822	0.275	0.235	1.74689e-06	STB-1	NECAP2
CWC22	5.68576e-11	0.31973	0.417	0.38	1.78237e-06	STB-1	CWC22
METTL16	5.97992e-11	0.361872	0.415	0.384	1.87459e-06	STB-1	METTL16
ALG13	6.04111e-11	0.362029	0.467	0.439	1.89377e-06	STB-1	ALG13
TYW5	6.515e-11	0.355594	0.384	0.353	2.04232e-06	STB-1	TYW5
CKS2	6.722e-11	0.541737	0.312	0.273	2.10721e-06	STB-1	CKS2
USP42	6.92934e-11	0.295357	0.453	0.418	2.17221e-06	STB-1	USP42
SNHG5	7.44309e-11	0.252494	0.584	0.557	2.33326e-06	STB-1	SNHG5
SREK1IP1	7.56789e-11	0.371621	0.379	0.345	2.37238e-06	STB-1	SREK1IP1
UHRF2	7.69325e-11	0.377896	0.386	0.354	2.41168e-06	STB-1	UHRF2
DGKD	9.13579e-11	0.975894	0.25	0.222	2.86389e-06	STB-1	DGKD
RC3H2	9.17764e-11	0.283631	0.546	0.529	2.87701e-06	STB-1	RC3H2
GATC	9.44919e-11	0.314718	0.283	0.241	2.96213e-06	STB-1	GATC
COG7	9.8539e-11	0.280818	0.448	0.413	3.089e-06	STB-1	COG7
MFSD11	1.0034e-10	0.272505	0.536	0.509	3.14546e-06	STB-1	MFSD11
NADSYN1	1.0144e-10	0.303392	0.396	0.358	3.17993e-06	STB-1	NADSYN1
HACE1	1.02623e-10	0.295521	0.538	0.515	3.21703e-06	STB-1	HACE1
WDR27	1.02833e-10	0.300372	0.532	0.516	3.22361e-06	STB-1	WDR27
TPP1	1.06853e-10	0.312505	0.445	0.41	3.34963e-06	STB-1	TPP1
EYS	1.10482e-10	0.423182	0.423	0.388	3.4634e-06	STB-1	EYS
LAMTOR3	1.11244e-10	0.412523	0.272	0.232	3.48728e-06	STB-1	LAMTOR3
TOX4	1.16313e-10	0.284872	0.523	0.496	3.64619e-06	STB-1	TOX4
TRMT10C	1.2617e-10	0.306618	0.405	0.365	3.95517e-06	STB-1	TRMT10C
MAVS	1.29408e-10	0.380774	0.314	0.276	4.05667e-06	STB-1	MAVS
RARRES1	1.3136e-10	0.282259	0.382	0.342	4.11788e-06	STB-1	RARRES1
GIT2	1.31595e-10	0.361721	0.328	0.289	4.12523e-06	STB-1	GIT2
HLA-E	1.33721e-10	0.327655	0.388	0.351	4.19189e-06	STB-1	HLA-E
ZNF141	1.34495e-10	0.318927	0.397	0.364	4.21615e-06	STB-1	ZNF141
ANAPC1	1.36578e-10	0.356805	0.369	0.335	4.28146e-06	STB-1	ANAPC1
HMOX1	1.48035e-10	0.340079	0.57	0.54	4.64061e-06	STB-1	HMOX1
ORC5	1.48936e-10	0.353035	0.326	0.288	4.66884e-06	STB-1	ORC5
CLASP1	1.49142e-10	0.296748	0.518	0.5	4.67531e-06	STB-1	CLASP1
TOLLIP	1.50544e-10	0.275718	0.44	0.401	4.71924e-06	STB-1	TOLLIP
ANXA11	1.50934e-10	0.292141	0.398	0.361	4.73149e-06	STB-1	ANXA11
GTF2A2	1.51781e-10	0.385021	0.267	0.229	4.75802e-06	STB-1	GTF2A2
MYCBP2-AS1	1.55316e-10	0.387738	0.437	0.408	4.86883e-06	STB-1	MYCBP2-AS1
NR3C1	1.55609e-10	0.347559	0.538	0.52	4.87804e-06	STB-1	NR3C1
POLA1	1.58828e-10	0.416132	0.32	0.286	4.97893e-06	STB-1	POLA1
ARFGAP2	1.64763e-10	0.307686	0.402	0.361	5.16499e-06	STB-1	ARFGAP2
HSPBAP1	1.65496e-10	0.256237	0.566	0.54	5.18798e-06	STB-1	HSPBAP1
DCUN1D5	1.69034e-10	0.382041	0.345	0.311	5.29888e-06	STB-1	DCUN1D5
SH3YL1	1.718e-10	0.277217	0.585	0.571	5.38558e-06	STB-1	SH3YL1
SMIM8	1.72191e-10	0.399686	0.407	0.375	5.39783e-06	STB-1	SMIM8
MAP2K2	1.72304e-10	0.26457	0.457	0.418	5.40139e-06	STB-1	MAP2K2
NFYA	1.75888e-10	0.379633	0.258	0.22	5.51375e-06	STB-1	NFYA
ZDHHC3	1.82819e-10	0.272787	0.513	0.488	5.731e-06	STB-1	ZDHHC3
VEZF1	1.8284e-10	0.330498	0.348	0.307	5.73167e-06	STB-1	VEZF1
NPIPB5	1.88773e-10	0.32025	0.428	0.395	5.91765e-06	STB-1	NPIPB5
ARHGAP10	1.93007e-10	0.496679	0.385	0.359	6.05039e-06	STB-1	ARHGAP10
DGCR8	1.99502e-10	0.276407	0.505	0.477	6.254e-06	STB-1	DGCR8
MTG1	2.01755e-10	0.349367	0.414	0.383	6.32462e-06	STB-1	MTG1
LRP11	2.03115e-10	0.330337	0.376	0.337	6.36724e-06	STB-1	LRP11
GTF2H1	2.17257e-10	0.329803	0.37	0.335	6.81056e-06	STB-1	GTF2H1
WDPCP	2.21213e-10	0.445146	0.411	0.38	6.93459e-06	STB-1	WDPCP
PSMD12	2.34085e-10	0.304305	0.467	0.439	7.33808e-06	STB-1	PSMD12
BRCA1	2.41914e-10	0.456092	0.284	0.249	7.58353e-06	STB-1	BRCA1
TMCO1	2.44885e-10	0.303232	0.346	0.304	7.67666e-06	STB-1	TMCO1
CDK5RAP1	2.5547e-10	0.327613	0.393	0.359	8.00847e-06	STB-1	CDK5RAP1
MAGOH	2.57801e-10	0.318064	0.383	0.343	8.08155e-06	STB-1	MAGOH
GDAP2	2.71302e-10	0.252919	0.537	0.513	8.50476e-06	STB-1	GDAP2
SUPV3L1	2.74878e-10	0.385293	0.295	0.258	8.61688e-06	STB-1	SUPV3L1
DDX55	2.77499e-10	0.326738	0.397	0.365	8.69905e-06	STB-1	DDX55
ZNF821	2.85967e-10	0.457983	0.269	0.232	8.96449e-06	STB-1	ZNF821
KCNQ1OT1	2.95124e-10	0.36889	0.59	0.574	9.25153e-06	STB-1	KCNQ1OT1
EIF2S3	3.01811e-10	0.268342	0.564	0.549	9.46118e-06	STB-1	EIF2S3
ARMC10	3.03304e-10	0.423161	0.309	0.274	9.50798e-06	STB-1	ARMC10
ATR	3.39046e-10	0.356624	0.449	0.425	1.06284e-05	STB-1	ATR
PGAM1	3.44963e-10	0.407969	0.485	0.461	1.08139e-05	STB-1	PGAM1
HAUS2	3.45671e-10	0.41829	0.256	0.219	1.08361e-05	STB-1	HAUS2
EHD4	3.52378e-10	0.356231	0.38	0.347	1.10463e-05	STB-1	EHD4
PSMC1	3.54924e-10	0.303971	0.479	0.45	1.11262e-05	STB-1	PSMC1
EXOC7	3.7791e-10	0.401934	0.288	0.251	1.18467e-05	STB-1	EXOC7
TTI1	3.80909e-10	0.399073	0.398	0.368	1.19407e-05	STB-1	TTI1
C15orf41	3.8565e-10	0.295995	0.525	0.508	1.20894e-05	STB-1	C15orf41
METTL15	4.2395e-10	0.308266	0.585	0.579	1.329e-05	STB-1	METTL15
FUT8	4.58121e-10	0.346824	0.634	0.62	1.43612e-05	STB-1	FUT8
TBC1D15	4.70798e-10	0.293942	0.602	0.584	1.47586e-05	STB-1	TBC1D15
M6PR	4.70923e-10	0.340133	0.394	0.358	1.47625e-05	STB-1	M6PR
RBM15	4.81789e-10	0.331846	0.271	0.232	1.51031e-05	STB-1	RBM15
LINC02326	5.31141e-10	0.297096	0.552	0.536	1.66502e-05	STB-1	LINC02326
SHARPIN	5.42027e-10	0.367475	0.352	0.315	1.69915e-05	STB-1	SHARPIN
LGALS8	5.69443e-10	0.306358	0.433	0.396	1.78509e-05	STB-1	LGALS8
KLHDC10	5.91507e-10	0.283314	0.501	0.475	1.85426e-05	STB-1	KLHDC10
ASPH	5.96845e-10	0.338193	0.433	0.396	1.87099e-05	STB-1	ASPH
SSBP1	6.03519e-10	0.314691	0.522	0.504	1.89191e-05	STB-1	SSBP1
SLC38A6	6.12272e-10	0.326332	0.35	0.312	1.91935e-05	STB-1	SLC38A6
ZNF322	6.18713e-10	0.399465	0.287	0.252	1.93954e-05	STB-1	ZNF322
KHSRP	6.4229e-10	0.340779	0.386	0.352	2.01345e-05	STB-1	KHSRP
HINFP	6.86221e-10	0.391216	0.261	0.225	2.15117e-05	STB-1	HINFP
ECHDC1	6.95718e-10	0.294114	0.43	0.396	2.18094e-05	STB-1	ECHDC1
MORC4	7.01519e-10	0.323584	0.515	0.484	2.19912e-05	STB-1	MORC4
SNW1	7.11464e-10	0.257016	0.535	0.512	2.2303e-05	STB-1	SNW1
VPS54	7.20514e-10	0.32791	0.407	0.378	2.25867e-05	STB-1	VPS54
TTC37	7.33562e-10	0.271124	0.644	0.641	2.29957e-05	STB-1	TTC37
DUSP11	7.53399e-10	0.374742	0.29	0.252	2.36175e-05	STB-1	DUSP11
NDOR1	7.72968e-10	0.410793	0.277	0.241	2.4231e-05	STB-1	NDOR1
BCCIP	7.90755e-10	0.287389	0.524	0.503	2.47886e-05	STB-1	BCCIP
SNRNP35	7.96645e-10	0.378301	0.261	0.224	2.49732e-05	STB-1	SNRNP35
AVEN	7.99997e-10	0.36743	0.373	0.339	2.50783e-05	STB-1	AVEN
ARRDC3-AS1	8.15845e-10	0.474532	0.429	0.397	2.55751e-05	STB-1	ARRDC3-AS1
TXLNG	8.17168e-10	0.379265	0.307	0.271	2.56166e-05	STB-1	TXLNG
NSA2	8.43015e-10	0.383006	0.348	0.313	2.64268e-05	STB-1	NSA2
RHBDL2	8.49202e-10	0.337729	0.312	0.27	2.66208e-05	STB-1	RHBDL2
FOSL2	8.54255e-10	0.295688	0.287	0.246	2.67792e-05	STB-1	FOSL2
RTCB	8.57904e-10	0.289986	0.493	0.465	2.68936e-05	STB-1	RTCB
AC106771.1	8.92502e-10	0.414257	0.262	0.226	2.79781e-05	STB-1	AC106771.1
TMEM260	9.09684e-10	0.267243	0.551	0.541	2.85168e-05	STB-1	TMEM260
ZNF10	9.35429e-10	0.440226	0.26	0.225	2.93238e-05	STB-1	ZNF10
SERTAD1	9.53084e-10	0.415028	0.289	0.252	2.98773e-05	STB-1	SERTAD1
POLDIP3	9.92641e-10	0.319382	0.445	0.413	3.11173e-05	STB-1	POLDIP3
GPR137B	1.00076e-09	0.393496	0.301	0.268	3.1372e-05	STB-1	GPR137B
C5orf51	1.00316e-09	0.366878	0.297	0.258	3.14471e-05	STB-1	C5orf51
SNRK	1.0145e-09	0.262779	0.499	0.47	3.18026e-05	STB-1	SNRK
SMCR8	1.05267e-09	0.349313	0.345	0.309	3.2999e-05	STB-1	SMCR8
GPALPP1	1.09645e-09	0.387351	0.313	0.28	3.43715e-05	STB-1	GPALPP1
NUP133	1.12025e-09	0.277854	0.457	0.43	3.51177e-05	STB-1	NUP133
SLC25A53	1.13837e-09	0.405662	0.251	0.215	3.56857e-05	STB-1	SLC25A53
OSBPL8	1.14929e-09	0.291538	0.602	0.597	3.60279e-05	STB-1	OSBPL8
PTER	1.1616e-09	0.327333	0.42	0.389	3.64137e-05	STB-1	PTER
KDSR	1.22315e-09	0.27674	0.419	0.38	3.83434e-05	STB-1	KDSR
UBAP2L	1.32377e-09	0.271864	0.534	0.515	4.14977e-05	STB-1	UBAP2L
RBM41	1.36539e-09	0.460985	0.284	0.253	4.28022e-05	STB-1	RBM41
MSANTD3	1.38592e-09	0.39	0.267	0.23	4.34459e-05	STB-1	MSANTD3
CCDC28A	1.39229e-09	0.373582	0.263	0.226	4.36456e-05	STB-1	CCDC28A
MBOAT7	1.40285e-09	0.321921	0.361	0.325	4.39767e-05	STB-1	MBOAT7
SLC30A9	1.42373e-09	0.259006	0.63	0.632	4.46312e-05	STB-1	SLC30A9
ISG20L2	1.44682e-09	0.319618	0.311	0.273	4.5355e-05	STB-1	ISG20L2
POGZ	1.67743e-09	0.330657	0.434	0.411	5.25841e-05	STB-1	POGZ
MRPL57	1.69591e-09	0.31126	0.381	0.346	5.31633e-05	STB-1	MRPL57
DCAF15	1.70392e-09	0.412729	0.262	0.225	5.34145e-05	STB-1	DCAF15
GABPA	1.77662e-09	0.311041	0.403	0.367	5.56933e-05	STB-1	GABPA
ARID4A	1.79995e-09	0.333615	0.447	0.42	5.64248e-05	STB-1	ARID4A
G2E3-AS1	1.80853e-09	0.315579	0.397	0.362	5.66937e-05	STB-1	G2E3-AS1
CIRBP	1.8379e-09	0.263864	0.654	0.653	5.76145e-05	STB-1	CIRBP
FAM177A1	1.87727e-09	0.274658	0.44	0.409	5.88488e-05	STB-1	FAM177A1
LINC00482	2.0083e-09	0.253823	0.609	0.585	6.29561e-05	STB-1	LINC00482
NCBP2	2.02526e-09	0.365452	0.37	0.339	6.3488e-05	STB-1	NCBP2
DDX27	2.06255e-09	0.34251	0.337	0.302	6.46567e-05	STB-1	DDX27
SPRTN	2.10386e-09	0.320171	0.363	0.33	6.59517e-05	STB-1	SPRTN
PIGG	2.16729e-09	0.333019	0.402	0.37	6.79403e-05	STB-1	PIGG
RAB22A	2.18214e-09	0.283098	0.39	0.355	6.84057e-05	STB-1	RAB22A
MPC2	2.50748e-09	0.378916	0.257	0.22	7.86044e-05	STB-1	MPC2
AP2A2	2.55355e-09	0.302372	0.486	0.464	8.00488e-05	STB-1	AP2A2
C1orf131	2.71662e-09	0.456993	0.281	0.247	8.51607e-05	STB-1	C1orf131
KLHDC2	2.81748e-09	0.355322	0.459	0.431	8.83222e-05	STB-1	KLHDC2
SCYL3	3.10339e-09	0.31202	0.379	0.345	9.72851e-05	STB-1	SCYL3
PGM3	3.21387e-09	0.272801	0.632	0.629	0.000100748	STB-1	PGM3
PAPSS1	3.21969e-09	0.344654	0.28	0.245	0.000100931	STB-1	PAPSS1
LAMB1	3.29622e-09	0.303562	0.573	0.561	0.00010333	STB-1	LAMB1
AL157829.1	3.47691e-09	0.416665	0.346	0.318	0.000108994	STB-1	AL157829.1
NHS	3.5881e-09	0.47268	0.251	0.217	0.00011248	STB-1	NHS
LACTB	3.60673e-09	0.398585	0.273	0.237	0.000113064	STB-1	LACTB
SMARCE1	3.77945e-09	0.317196	0.409	0.38	0.000118478	STB-1	SMARCE1
DNAJC25	3.79081e-09	0.356185	0.374	0.343	0.000118834	STB-1	DNAJC25
IMMP1L	3.79764e-09	0.35271	0.414	0.391	0.000119048	STB-1	IMMP1L
ZNF830	3.84366e-09	0.346538	0.346	0.313	0.000120491	STB-1	ZNF830
MRM2	3.87688e-09	0.384859	0.264	0.229	0.000121532	STB-1	MRM2
MITD1	3.92197e-09	0.293176	0.432	0.404	0.000122946	STB-1	MITD1
ICE1	3.99875e-09	0.326535	0.361	0.33	0.000125353	STB-1	ICE1
DDX21	4.0344e-09	0.262236	0.719	0.73	0.00012647	STB-1	DDX21
PCMTD2	4.07938e-09	0.326422	0.408	0.378	0.00012788	STB-1	PCMTD2
METTL14	4.16797e-09	0.389056	0.296	0.263	0.000130657	STB-1	METTL14
AK9	4.24718e-09	0.358681	0.302	0.266	0.000133141	STB-1	AK9
RMND1	4.3524e-09	0.250171	0.558	0.537	0.000136439	STB-1	RMND1
CYB5B	4.41356e-09	0.323229	0.359	0.325	0.000138356	STB-1	CYB5B
BRCC3	4.42841e-09	0.379916	0.284	0.249	0.000138822	STB-1	BRCC3
MAPKAPK5	4.47471e-09	0.333417	0.366	0.334	0.000140273	STB-1	MAPKAPK5
ATF7IP2	4.51545e-09	0.528841	0.387	0.365	0.00014155	STB-1	ATF7IP2
CCDC126	4.57789e-09	0.355034	0.257	0.221	0.000143508	STB-1	CCDC126
DEAF1	4.63089e-09	0.261869	0.496	0.467	0.000145169	STB-1	DEAF1
SMIM7	4.71193e-09	0.289954	0.478	0.453	0.00014771	STB-1	SMIM7
NOL9	4.79657e-09	0.335651	0.37	0.339	0.000150363	STB-1	NOL9
C2orf49	4.79966e-09	0.320128	0.385	0.354	0.00015046	STB-1	C2orf49
TRIM26	4.83625e-09	0.286376	0.39	0.356	0.000151607	STB-1	TRIM26
LEMD2	4.87866e-09	0.403018	0.301	0.268	0.000152936	STB-1	LEMD2
GID8	4.89501e-09	0.261152	0.47	0.437	0.000153449	STB-1	GID8
LINC00862	5.0883e-09	0.252122	0.631	0.627	0.000159508	STB-1	LINC00862
FNTB	5.13351e-09	0.284234	0.497	0.477	0.000160925	STB-1	FNTB
SRGAP2B	5.37853e-09	0.376453	0.291	0.258	0.000168606	STB-1	SRGAP2B
AC018628.2	6.28049e-09	0.309174	0.422	0.389	0.000196881	STB-1	AC018628.2
EIF2B1	6.48558e-09	0.350138	0.418	0.386	0.00020331	STB-1	EIF2B1
MDN1	6.84734e-09	0.330764	0.517	0.505	0.00021465	STB-1	MDN1
TMEM68	6.86839e-09	0.300975	0.384	0.35	0.00021531	STB-1	TMEM68
UGDH-AS1	7.32027e-09	0.36738	0.267	0.232	0.000229476	STB-1	UGDH-AS1
GCSH	7.70081e-09	0.380884	0.303	0.268	0.000241405	STB-1	GCSH
PPP1R2	7.71485e-09	0.343405	0.415	0.387	0.000241845	STB-1	PPP1R2
UBP1	8.07139e-09	0.307034	0.35	0.317	0.000253022	STB-1	UBP1
TRIM4	8.21812e-09	0.359956	0.317	0.284	0.000257621	STB-1	TRIM4
ZCCHC8	8.23733e-09	0.295023	0.559	0.534	0.000258224	STB-1	ZCCHC8
ICE2	8.3109e-09	0.343679	0.403	0.38	0.00026053	STB-1	ICE2
MKRN2	8.43474e-09	0.289359	0.434	0.403	0.000264412	STB-1	MKRN2
NEMP1	8.65512e-09	0.4409	0.287	0.256	0.000271321	STB-1	NEMP1
CDRT4	9.24832e-09	0.392962	0.275	0.242	0.000289916	STB-1	CDRT4
SKI	9.35501e-09	0.263532	0.494	0.47	0.000293261	STB-1	SKI
GTF3C3	9.3766e-09	0.369198	0.312	0.28	0.000293938	STB-1	GTF3C3
ZNF317	9.37833e-09	0.378816	0.283	0.249	0.000293992	STB-1	ZNF317
TSR1	9.40857e-09	0.333349	0.309	0.274	0.00029494	STB-1	TSR1
ATXN7L3B	1.00054e-08	0.279794	0.412	0.383	0.00031365	STB-1	ATXN7L3B
SBNO2	1.01062e-08	0.270279	0.444	0.413	0.000316809	STB-1	SBNO2
S100A10	1.04531e-08	0.297251	0.45	0.419	0.000327683	STB-1	S100A10
INTS2	1.05135e-08	0.418446	0.438	0.41	0.000329577	STB-1	INTS2
CBFB	1.07322e-08	0.261298	0.521	0.506	0.000336434	STB-1	CBFB
EXOC5	1.14164e-08	0.284498	0.459	0.437	0.000357881	STB-1	EXOC5
GTF2A1	1.17884e-08	0.263024	0.521	0.499	0.000369544	STB-1	GTF2A1
GSTCD	1.20831e-08	0.309354	0.427	0.401	0.000378782	STB-1	GSTCD
METTL2B	1.21232e-08	0.296091	0.478	0.459	0.000380037	STB-1	METTL2B
SYPL1	1.2761e-08	0.343156	0.327	0.295	0.000400032	STB-1	SYPL1
NPIPB4	1.30756e-08	0.337305	0.274	0.241	0.000409895	STB-1	NPIPB4
CDC40	1.40085e-08	0.343379	0.324	0.291	0.000439137	STB-1	CDC40
SMC3	1.40585e-08	0.286928	0.412	0.381	0.000440705	STB-1	SMC3
MED17	1.41064e-08	0.263703	0.475	0.448	0.000442206	STB-1	MED17
DHX34	1.44878e-08	0.350662	0.436	0.411	0.000454164	STB-1	DHX34
STRIP1	1.46245e-08	0.269824	0.361	0.327	0.000458449	STB-1	STRIP1
MIR31HG	1.47243e-08	0.37129	0.317	0.284	0.000461576	STB-1	MIR31HG
ADIPOR1	1.49502e-08	0.28541	0.374	0.34	0.000468659	STB-1	ADIPOR1
AC013287.1	1.59571e-08	0.459329	0.304	0.274	0.000500222	STB-1	AC013287.1
ZNFX1	1.59853e-08	0.310097	0.34	0.306	0.000501106	STB-1	ZNFX1
ARHGAP29	1.65947e-08	0.405848	0.44	0.42	0.000520209	STB-1	ARHGAP29
CSKMT	1.67541e-08	0.385685	0.399	0.372	0.000525206	STB-1	CSKMT
ARL5B	1.69055e-08	0.27667	0.458	0.433	0.000529953	STB-1	ARL5B
PRKAR1A	1.70647e-08	0.403912	0.25	0.218	0.000534945	STB-1	PRKAR1A
STX6	1.78082e-08	0.278326	0.448	0.42	0.000558252	STB-1	STX6
PPP1R12C	1.82201e-08	0.328292	0.396	0.363	0.000571163	STB-1	PPP1R12C
AC124947.1	1.89149e-08	0.291426	0.302	0.265	0.000592945	STB-1	AC124947.1
PSMB2	1.9024e-08	0.311197	0.377	0.348	0.000596363	STB-1	PSMB2
HDAC3	2.01369e-08	0.285177	0.466	0.442	0.000631253	STB-1	HDAC3
RAD51-AS1	2.06899e-08	0.350296	0.36	0.331	0.000648587	STB-1	RAD51-AS1
ADSS	2.08614e-08	0.270394	0.432	0.401	0.000653963	STB-1	ADSS
PDSS1	2.08786e-08	0.365473	0.271	0.239	0.000654502	STB-1	PDSS1
ADAMTSL4-AS1	2.18323e-08	0.273386	0.691	0.691	0.000684398	STB-1	ADAMTSL4-AS1
GRIPAP1	2.33315e-08	0.385989	0.265	0.232	0.000731397	STB-1	GRIPAP1
SP6	2.35138e-08	0.429771	0.306	0.271	0.00073711	STB-1	SP6
TGFBRAP1	2.3751e-08	0.339496	0.288	0.255	0.000744545	STB-1	TGFBRAP1
KLHL29	2.46074e-08	0.3869	0.431	0.409	0.000771394	STB-1	KLHL29
ENY2	2.56716e-08	0.325658	0.46	0.438	0.000804753	STB-1	ENY2
LLPH	2.64761e-08	0.344958	0.285	0.251	0.000829973	STB-1	LLPH
TRAP1	2.67684e-08	0.390844	0.299	0.27	0.000839137	STB-1	TRAP1
PTBP2	2.73295e-08	0.25855	0.562	0.549	0.000856726	STB-1	PTBP2
SUMF1	2.7551e-08	0.368576	0.588	0.591	0.000863668	STB-1	SUMF1
CLK3	2.84071e-08	0.367282	0.282	0.25	0.000890506	STB-1	CLK3
GTDC1	2.93307e-08	0.346969	0.336	0.303	0.000919459	STB-1	GTDC1
CDK11B	2.94195e-08	0.298198	0.395	0.364	0.000922243	STB-1	CDK11B
ST8SIA6-AS1	2.9459e-08	0.251911	0.647	0.659	0.000923482	STB-1	ST8SIA6-AS1
IGF2	2.95122e-08	0.316088	0.287	0.254	0.000925147	STB-1	IGF2
SPICE1	3.00202e-08	0.334611	0.352	0.323	0.000941073	STB-1	SPICE1
ECD	3.0493e-08	0.336761	0.352	0.321	0.000955895	STB-1	ECD
SMARCA2	3.12448e-08	0.278177	0.502	0.485	0.000979461	STB-1	SMARCA2
C9orf72	3.27667e-08	0.294751	0.381	0.35	0.00102717	STB-1	C9orf72
AC025159.1	3.74475e-08	0.529025	0.25	0.22	0.00117391	STB-1	AC025159.1
FTL	3.78169e-08	0.255442	0.812	0.817	0.00118548	STB-1	FTL
KDM4A	4.11502e-08	0.344444	0.298	0.266	0.00128998	STB-1	KDM4A
SRFBP1	4.12166e-08	0.351536	0.338	0.31	0.00129206	STB-1	SRFBP1
MFN1	4.21058e-08	0.273157	0.456	0.433	0.00131993	STB-1	MFN1
AL513327.1	4.22719e-08	0.352005	0.287	0.254	0.00132514	STB-1	AL513327.1
TAF11	4.24535e-08	0.316322	0.332	0.3	0.00133083	STB-1	TAF11
CHML	4.30932e-08	0.304831	0.322	0.288	0.00135088	STB-1	CHML
MBTPS2	4.48263e-08	0.385213	0.274	0.243	0.00140522	STB-1	MBTPS2
NCOA5	4.51315e-08	0.297097	0.402	0.376	0.00141478	STB-1	NCOA5
RBBP4	4.5648e-08	0.266795	0.523	0.504	0.00143097	STB-1	RBBP4
AL353138.1	4.75585e-08	0.360693	0.382	0.351	0.00149086	STB-1	AL353138.1
SRP9	4.92194e-08	0.256181	0.429	0.398	0.00154293	STB-1	SRP9
METTL3	4.99149e-08	0.379047	0.277	0.247	0.00156473	STB-1	METTL3
PCGF3	5.32295e-08	0.283432	0.332	0.299	0.00166864	STB-1	PCGF3
FAM13A-AS1	5.32377e-08	0.36551	0.344	0.315	0.0016689	STB-1	FAM13A-AS1
PPP1R8	5.40818e-08	0.369846	0.274	0.242	0.00169536	STB-1	PPP1R8
AC091045.1	5.4212e-08	0.276749	0.347	0.312	0.00169944	STB-1	AC091045.1
ZBTB5	5.45621e-08	0.269225	0.41	0.379	0.00171041	STB-1	ZBTB5
GNL1	5.47916e-08	0.312238	0.295	0.264	0.00171761	STB-1	GNL1
PIN4	5.6536e-08	0.291886	0.414	0.385	0.00177229	STB-1	PIN4
SETD7	5.73932e-08	0.367171	0.274	0.242	0.00179916	STB-1	SETD7
DNAJC8	5.79902e-08	0.252952	0.519	0.499	0.00181788	STB-1	DNAJC8
TP53BP1	5.81235e-08	0.293736	0.443	0.423	0.00182205	STB-1	TP53BP1
CAPZA2	6.29002e-08	0.260605	0.445	0.421	0.00197179	STB-1	CAPZA2
AC005037.1	6.44716e-08	0.252835	0.424	0.392	0.00202106	STB-1	AC005037.1
CMTR1	6.58748e-08	0.364344	0.284	0.255	0.00206504	STB-1	CMTR1
FGFR1OP	6.60331e-08	0.394502	0.269	0.241	0.00207001	STB-1	FGFR1OP
MAPK10	6.66736e-08	0.47912	0.356	0.329	0.00209008	STB-1	MAPK10
TRAPPC6B	7.02933e-08	0.40913	0.251	0.22	0.00220355	STB-1	TRAPPC6B
ELAVL1	7.10504e-08	0.261227	0.572	0.562	0.00222729	STB-1	ELAVL1
HSPA14.1	7.72305e-08	0.306334	0.334	0.301	0.00242102	STB-1	HSPA14.1
TASP1	7.8492e-08	0.270298	0.495	0.48	0.00246057	STB-1	TASP1
OPN3	8.10869e-08	0.285738	0.395	0.363	0.00254191	STB-1	OPN3
LINC00174	8.20352e-08	0.373474	0.351	0.323	0.00257164	STB-1	LINC00174
NFATC2IP	8.41046e-08	0.326482	0.386	0.359	0.00263651	STB-1	NFATC2IP
CPSF4	8.56094e-08	0.297306	0.355	0.322	0.00268368	STB-1	CPSF4
DENND6A	8.83783e-08	0.324255	0.255	0.222	0.00277048	STB-1	DENND6A
KLC4	8.9313e-08	0.314476	0.273	0.24	0.00279979	STB-1	KLC4
TFB2M	9.28316e-08	0.338264	0.305	0.274	0.00291009	STB-1	TFB2M
TTN	9.5922e-08	0.477014	0.256	0.228	0.00300696	STB-1	TTN
VPS33A	1.0078e-07	0.362376	0.289	0.261	0.00315925	STB-1	VPS33A
TSC2	1.01552e-07	0.357318	0.327	0.298	0.00318346	STB-1	TSC2
STAMBP	1.05378e-07	0.371691	0.328	0.302	0.0033034	STB-1	STAMBP
INTS7	1.12936e-07	0.324567	0.386	0.363	0.00354031	STB-1	INTS7
ZNF544	1.12938e-07	0.332226	0.351	0.322	0.00354039	STB-1	ZNF544
AC009686.1	1.15485e-07	0.399168	0.355	0.329	0.00362023	STB-1	AC009686.1
HADHA	1.1685e-07	0.261677	0.454	0.428	0.00366302	STB-1	HADHA
CBX5	1.19817e-07	0.253836	0.445	0.419	0.00375602	STB-1	CBX5
SYAP1	1.22623e-07	0.27052	0.474	0.45	0.00384398	STB-1	SYAP1
NSUN2	1.23838e-07	0.324627	0.387	0.364	0.00388208	STB-1	NSUN2
RPS6KA3	1.37345e-07	0.254787	0.39	0.363	0.00430548	STB-1	RPS6KA3
COMMD6	1.39962e-07	0.263357	0.309	0.276	0.00438753	STB-1	COMMD6
CARNMT1	1.41722e-07	0.375823	0.282	0.253	0.00444271	STB-1	CARNMT1
ESF1	1.51371e-07	0.267728	0.55	0.543	0.00474517	STB-1	ESF1
TOGARAM1	1.61661e-07	0.380976	0.32	0.294	0.00506776	STB-1	TOGARAM1
TTC27	1.62036e-07	0.354316	0.369	0.346	0.00507951	STB-1	TTC27
PLXND1	1.74801e-07	0.401178	0.302	0.273	0.00547965	STB-1	PLXND1
RIN2	1.7697e-07	0.428229	0.368	0.343	0.00554766	STB-1	RIN2
SLC25A32	1.77804e-07	0.311605	0.36	0.335	0.00557381	STB-1	SLC25A32
PPP2R1A	1.77849e-07	0.27884	0.357	0.327	0.00557521	STB-1	PPP2R1A
TDP2	1.83414e-07	0.261622	0.369	0.337	0.00574967	STB-1	TDP2
ABHD13	1.84422e-07	0.336591	0.298	0.27	0.00578125	STB-1	ABHD13
MAST4-AS1	1.90538e-07	0.371218	0.375	0.347	0.00597298	STB-1	MAST4-AS1
GTPBP10	1.96959e-07	0.297159	0.391	0.367	0.00617428	STB-1	GTPBP10
RPL7L1	2.01949e-07	0.274676	0.457	0.434	0.00633071	STB-1	RPL7L1
DDA1	2.07702e-07	0.284364	0.422	0.394	0.00651105	STB-1	DDA1
AGGF1	2.17641e-07	0.365066	0.265	0.235	0.0068226	STB-1	AGGF1
PHLDB3	2.25161e-07	0.30425	0.452	0.428	0.00705835	STB-1	PHLDB3
SNHG7	2.27583e-07	0.358242	0.321	0.293	0.00713426	STB-1	SNHG7
MRPL14	2.36253e-07	0.260879	0.345	0.314	0.00740606	STB-1	MRPL14
SPACA6	2.44115e-07	0.330611	0.396	0.37	0.00765253	STB-1	SPACA6
ATF6B	2.6356e-07	0.292567	0.352	0.321	0.00826208	STB-1	ATF6B
SNIP1	2.64884e-07	0.343781	0.36	0.332	0.00830359	STB-1	SNIP1
IPO11	2.70731e-07	0.325044	0.366	0.342	0.00848688	STB-1	IPO11
PPP2R5A	2.71708e-07	0.293965	0.445	0.425	0.00851751	STB-1	PPP2R5A
DDX23	2.7752e-07	0.26948	0.299	0.267	0.00869971	STB-1	DDX23
HNRNPLL	2.79638e-07	0.291248	0.331	0.301	0.00876609	STB-1	HNRNPLL
SLC4A2	3.03267e-07	0.340218	0.295	0.265	0.00950681	STB-1	SLC4A2
CBLL1	3.12325e-07	0.333987	0.273	0.244	0.00979078	STB-1	CBLL1
SH3GLB1	3.20496e-07	0.29264	0.386	0.362	0.0100469	STB-1	SH3GLB1
B4GALT5	3.22786e-07	0.276347	0.351	0.322	0.0101187	STB-1	B4GALT5
DVL2	3.30834e-07	0.311876	0.297	0.266	0.010371	STB-1	DVL2
NOL8	3.38645e-07	0.273153	0.438	0.415	0.0106159	STB-1	NOL8
RRP15	3.60713e-07	0.423683	0.274	0.248	0.0113076	STB-1	RRP15
GTF3C1	3.95199e-07	0.370162	0.251	0.223	0.0123887	STB-1	GTF3C1
C8orf76	4.05644e-07	0.259236	0.387	0.36	0.0127161	STB-1	C8orf76
PPP1R11	4.19871e-07	0.360833	0.272	0.244	0.0131621	STB-1	PPP1R11
AC104461.1	4.77873e-07	0.280466	0.6	0.59	0.0149804	STB-1	AC104461.1
NELFA	5.1701e-07	0.300616	0.378	0.351	0.0162072	STB-1	NELFA
NDUFA5	5.23229e-07	0.289368	0.314	0.285	0.0164022	STB-1	NDUFA5
THAP12	5.36857e-07	0.327431	0.299	0.27	0.0168294	STB-1	THAP12
GINM1	5.40041e-07	0.259899	0.437	0.416	0.0169292	STB-1	GINM1
ADNP2	5.88179e-07	0.42224	0.473	0.464	0.0184382	STB-1	ADNP2
HMGB1	6.13745e-07	0.309335	0.44	0.418	0.0192397	STB-1	HMGB1
TSPYL2	6.33989e-07	0.336333	0.329	0.3	0.0198743	STB-1	TSPYL2
EIF2B4	6.57926e-07	0.279756	0.405	0.378	0.0206247	STB-1	EIF2B4
CCDC138	6.779e-07	0.297755	0.286	0.257	0.0212508	STB-1	CCDC138
MRNIP	7.04216e-07	0.378601	0.314	0.29	0.0220758	STB-1	MRNIP
TIPARP	7.24916e-07	0.369361	0.288	0.259	0.0227247	STB-1	TIPARP
TMX3	7.36623e-07	0.266612	0.357	0.331	0.0230917	STB-1	TMX3
CLN8	7.37011e-07	0.262657	0.326	0.298	0.0231038	STB-1	CLN8
PGPEP1	7.98727e-07	0.266729	0.506	0.489	0.0250385	STB-1	PGPEP1
CHMP3	8.11995e-07	0.292371	0.397	0.372	0.0254544	STB-1	CHMP3
TMEM50A	8.29604e-07	0.27674	0.385	0.358	0.0260064	STB-1	TMEM50A
TMEM230	8.37314e-07	0.250809	0.452	0.43	0.0262481	STB-1	TMEM230
NUP37	9.21403e-07	0.358179	0.252	0.224	0.0288841	STB-1	NUP37
PRPF38A	9.54367e-07	0.278706	0.292	0.263	0.0299175	STB-1	PRPF38A
CPNE3	9.77776e-07	0.285064	0.346	0.319	0.0306513	STB-1	CPNE3
PPTC7	9.78871e-07	0.312796	0.367	0.343	0.0306857	STB-1	PPTC7
OPTN	1.00734e-06	0.325421	0.394	0.373	0.0315781	STB-1	OPTN
TCP1	1.01594e-06	0.270924	0.365	0.337	0.0318477	STB-1	TCP1
[truncated: 2,465 more rows]
