# Supplementary material for: Comparative analysis of the syncytiotrophoblast in placenta tissue and trophoblast organoids using snRNA sequencing
Source: bioRxiv preprint, doi:10.1101/2024.07.01.601571, version 2 (2025-02-19)
Supplement: SupplementalTable_Figure3H [file 601571_file05.xlsx]

## Sheet: STB1
gene name	log2FoldChange	pvalue	padj	GotermSTBout	GotermSTBin	pvalue_transformed
POLR1B	1.05142	0.00149405	0.0140546	female pregnancy	None	2.82563
CORIN	2.11046	5.14824e-05	0.00100739	female pregnancy	None	4.28834
LNPEP	1.18025	0.00305594	0.0239896	female pregnancy	None	2.51486
TEAD3	1.29054	3.75416e-08	2.77736e-06	female pregnancy	None	7.42549
CLIC5	2.66766	0.00171733	0.0156036	female pregnancy	None	2.76515
CRH	2.10388	0.245069	0.450347	female pregnancy	None	0.610711
RLN2	1.73221	0.667149	NA	female pregnancy	None	0.175777
FOSL1	1.00248	0.0102571	0.05689	female pregnancy	None	1.98898
PGR	2.02158	0.588054	0.762932	female pregnancy	None	0.230582
ENDOU	1.24779	0.00118667	0.0119412	female pregnancy	None	2.92567
ITGA5	1.15032	0.000257898	0.00362622	female pregnancy	None	3.58855
TAC3	1.0388	0.723126	NA	female pregnancy	None	0.140786
ADCY7	2.72666	7.53329e-06	0.00021955	female pregnancy	None	5.12302
ITGA3	1.03092	0.000285939	0.00393409	female pregnancy	None	3.54373
SMURF2	1.13759	4.23767e-06	0.000137688	female pregnancy	None	5.37287
BCL2	3.67861	5.21399e-12	1.49688e-09	female pregnancy	None	11.2828
CALR	1.55797	1.52518e-08	1.32746e-06	female pregnancy	None	7.81668
FBLN1	1.02426	0.0431872	0.1503	female pregnancy	None	1.36464
AR	4.3103	0.0745489	0.216249	female pregnancy	None	1.12756
ACSL4	2.3094	0.00120523	0.0120995	female pregnancy	None	2.91893
CPTP	1.06816	0.00916529	0.0525938	lipid transport	None	2.03785
PLA2G2F	1.05577	0.454567	0.659026	lipid transport	None	0.342402
PLPPR4	1.12726	0.778188	NA	lipid transport	None	0.108916
APOA2	2.08907	0.601655	NA	lipid transport	None	0.220652
PLA2G4A	1.00995	0.687879	0.830854	lipid transport	None	0.162488
ITGAV	1.79807	7.49526e-11	1.45628e-08	lipid transport	None	10.1252
ACSL3	1.10889	7.71572e-08	5.08627e-06	lipid transport	None	7.11262
ESYT3	1.44627	0.00217085	0.0186412	lipid transport	None	2.66337
PLSCR2	2.20939	2.84499e-07	1.48302e-05	lipid transport	None	6.54592
PLSCR1	1.49729	5.34928e-07	2.55954e-05	lipid transport	None	6.2717
ATP10D	1.49652	8.50289e-05	0.00151295	lipid transport	None	4.07043
SLC10A6	2.70225	2.40976e-08	1.9394e-06	lipid transport	None	7.61803
SLC10A7	1.05102	1.61027e-05	0.000403827	lipid transport	None	4.7931
DAB2	1.44457	0.00920663	0.0527448	lipid transport	None	2.0359
GDF9	1.17614	0.407142	0.617115	lipid transport	None	0.390254
SEC24A	1.06873	0.000134562	0.00217138	lipid transport	None	3.87108
GM2A	1.21067	4.27342e-05	0.000871492	lipid transport	None	4.36922
PRELID1	1.22145	9.00073e-06	0.000252007	lipid transport	None	5.04572
NUS1	1.34834	2.87932e-07	1.49282e-05	lipid transport	None	6.54071
OSBPL3	1.20707	2.74886e-09	3.11026e-07	lipid transport	None	8.56085
EEPD1	1.4781	0.0837847	0.232232	lipid transport	None	1.07684
ABCA13	1.73221	0.667149	NA	lipid transport	None	0.175777
CROT	1.37519	7.63494e-06	0.000220734	lipid transport	None	5.11719
TTPA	1.53484	0.0407538	0.144896	lipid transport	None	1.38983
SIGMAR1	1.20491	0.000578852	0.0068434	lipid transport	None	3.23743
LIPA	1.50815	6.71797e-06	0.000200341	lipid transport	None	5.17276
ZDHHC5	1.11098	2.40995e-06	8.61625e-05	lipid transport	None	5.61799
SPX	3.60993	0.287657	NA	lipid transport	None	0.541125
ANO4	3.08244	0.000205845	0.00304572	lipid transport	None	3.68646
PITPNM2	1.08559	0.0050184	0.0342909	lipid transport	None	2.29943
ATP8A2	1.11318	0.0343165	0.129819	lipid transport	None	1.4645
ATP11A	1.26997	0.00135069	0.0130424	lipid transport	None	2.86944
SGPP1	1.36789	5.28883e-05	0.00103071	lipid transport	None	4.27664
ATP8B4	1.93948	0.0188657	0.0867514	lipid transport	None	1.72433
AQP9	2.44006	0.489933	NA	lipid transport	None	0.309863
CETP	1.38754	0.560564	0.742542	lipid transport	None	0.251374
NOS2	2.78271	0.0150233	0.0747087	lipid transport	None	1.82323
PCTP	1.47041	1.80369e-05	0.000439294	lipid transport	None	4.74384
ABCA10	1.12812	0.00128648	0.0126576	lipid transport	None	2.8906
LIPG	1.31042	1.53303e-05	0.00039005	lipid transport	None	4.81445
LDLR	1.05434	1.52985e-05	0.000389991	lipid transport	None	4.81535
GRAMD1A	1.0293	0.0805211	0.226336	lipid transport	None	1.09409
KCNN4	1.16455	0.000375881	0.00488804	lipid transport	None	3.42495
AL627309.1	NA	NA	NA	None	None	NA
AL627309.5	0.534299	0.218876	0.420209	None	None	0.659802
AL627309.4	NA	NA	NA	None	None	NA
AP006222.2	NA	NA	NA	None	None	NA
AC114498.1	-4.86569	0.215339	0.41634	None	None	0.666878
AL669831.2	-6.03416	0.00612894	0.0394413	None	None	2.21261
LINC01409	-0.189534	0.497535	0.694843	None	None	0.303177
FAM87B	-6.13149	0.0288485	0.116234	None	None	1.53988
LINC01128	0.313214	0.463267	0.66589	None	None	0.334169
LINC00115	0.0159372	0.970029	0.986308	None	None	0.0132154
FAM41C	NA	NA	NA	None	None	NA
AL645608.6	NA	NA	NA	None	None	NA
AL645608.2	NA	NA	NA	None	None	NA
SAMD11	-2.22278	0.581402	NA	None	None	0.235523
NOC2L	-0.243679	0.533809	0.723255	None	None	0.272614
KLHL17	-5.93676	0.000361743	0.00474634	None	None	3.4416
PLEKHN1	-1.61346	0.00605675	0.0390945	None	None	2.21776
PERM1	-3.79498	0.336584	NA	None	None	0.472906
AL645608.7	NA	NA	NA	None	None	NA
HES4	-0.962337	0.16867	0.359048	None	None	0.772963
ISG15	0.295597	0.446103	0.651541	None	None	0.350565
AL645608.1	-3.92446	0.319913	NA	None	None	0.494968
AGRN	-0.475904	0.449463	0.65456	None	None	0.347306
RNF223	-2.05595	0.0525877	0.17159	None	None	1.27912
C1orf159	-0.0191695	0.959305	0.981241	None	None	0.0180432
AL390719.3	0.159362	0.684964	0.828843	None	None	0.164332
TTLL10	NA	NA	NA	None	None	NA
SDF4	-0.0279607	0.913104	0.958234	None	None	0.0394799
B3GALT6	0.307477	0.747935	0.866882	None	None	0.126136
C1QTNF12	-5.26933	0.00262184	0.0214327	None	None	2.58139
AL162741.1	NA	NA	NA	None	None	NA
UBE2J2	-0.127056	0.516114	0.709307	None	None	0.287254
LINC01786	NA	NA	NA	None	None	NA
ACAP3	0.182268	0.51575	0.70906	None	None	0.28756
PUSL1	0.971967	0.0456922	0.156025	None	None	1.34016
INTS11	0.131246	0.633801	0.794368	None	None	0.198047
TAS1R3	NA	NA	NA	None	None	NA
DVL1	0.350414	0.312163	0.523583	None	None	0.505619
MXRA8	0.396921	0.780644	0.886614	None	None	0.107547
AURKAIP1	0.44044	0.0418379	0.147276	None	None	1.37843
CCNL2	-0.364924	0.199521	0.398277	None	None	0.700011
MRPL20-AS1	0.158885	0.703148	0.840124	None	None	0.152953
MRPL20	0.40416	0.0542098	0.174925	None	None	1.26592
AL391244.2	0.272866	0.865059	0.931084	None	None	0.0629544
ANKRD65	-6.45254	0.0168501	0.080494	None	None	1.7734
AL391244.1	NA	NA	NA	None	None	NA
LINC01770	-5.51557	0.0360403	0.134077	None	None	1.44321
VWA1	-0.147962	0.568296	0.748096	None	None	0.245425
ATAD3C	-0.421281	0.333406	0.544086	None	None	0.477027
ATAD3B	0.822684	0.00434797	0.0308843	None	None	2.36171
ATAD3A	0.830452	0.026994	0.111208	None	None	1.56873
TMEM240	-4.32329	0.0534062	0.173187	None	None	1.27241
SSU72	0.144513	0.619647	0.783932	None	None	0.207856
AL645728.1	-0.570467	0.204158	0.403601	None	None	0.690033
FNDC10	-2.02737	0.616607	NA	None	None	0.209991
AL691432.4	-5.93307	0.129796	0.304917	None	None	0.886738
AL691432.2	0.0201416	0.959744	0.981295	None	None	0.0178446
MIB2	-0.774341	0.0294593	0.117856	None	None	1.53078
MMP23B	-0.08026	0.952961	0.97808	None	None	0.0209251
CDK11B	0.230753	0.49387	0.692092	None	None	0.306388
FO704657.1	-5.26226	0.00709078	0.0437567	None	None	2.14931
SLC35E2B	-0.0918325	0.744739	0.864769	None	None	0.127996
CDK11A	-0.266451	0.4708	0.672584	None	None	0.327163
SLC35E2A	-0.255786	0.664854	0.814708	None	None	0.177274
NADK	0.616024	0.0486598	0.163118	None	None	1.31283
GNB1	-0.178981	0.366002	0.576675	None	None	0.436516
AL109917.1	NA	NA	NA	None	None	NA
CALML6	NA	NA	NA	None	None	NA
TMEM52	-3.72864	0.231752	0.435966	None	None	0.634976
CFAP74	0.0776161	0.902876	0.952389	None	None	0.0443721
AL391845.2	NA	NA	NA	None	None	NA
GABRD	NA	NA	NA	None	None	NA
AL391845.1	NA	NA	NA	None	None	NA
PRKCZ	0.790221	0.0112728	0.0609938	None	None	1.94797
AL590822.2	0.349954	0.480926	0.681545	None	None	0.317922
PRKCZ-AS1	-0.783298	0.6618	0.813141	None	None	0.179273
FAAP20	-0.337179	0.260048	0.46761	None	None	0.584947
AL590822.1	0.485774	0.827471	0.912143	None	None	0.0822475
SKI	0.635207	0.0159176	0.0776485	None	None	1.79812
AL590822.3	-0.285021	0.944313	NA	None	None	0.024884
MORN1	-0.604741	0.0847212	0.233837	None	None	1.07201
AL513477.2	NA	NA	NA	None	None	NA
RER1	0.260563	0.309296	0.521046	None	None	0.509626
PEX10	-0.135273	0.534795	0.723874	None	None	0.271812
PANK4	-0.160486	0.603809	0.773975	None	None	0.219101
AL139246.5	-0.364256	0.435194	0.641847	None	None	0.361317
TNFRSF14-AS1	NA	NA	NA	None	None	NA
TNFRSF14	-2.72278	0.49558	NA	None	None	0.304886
PRXL2B	NA	NA	NA	None	None	NA
TTC34	-3.3958	0.391475	NA	None	None	0.407296
PRDM16	-2.00337	0.620987	NA	None	None	0.206917
ARHGEF16	0.874079	0.146677	0.328711	None	None	0.833639
AL512413.1	NA	NA	NA	None	None	NA
MEGF6	-4.7122	0.0180007	0.0843261	None	None	1.74471
AL513320.1	-2.00337	0.620987	NA	None	None	0.206917
TPRG1L	-0.0815895	0.8486	0.922871	None	None	0.0712971
WRAP73	0.462322	0.238853	0.444069	None	None	0.621869
TP73	2.07543	0.159075	0.346171	None	None	0.798399
AL136528.1	1.12726	0.778188	NA	None	None	0.108916
CCDC27	NA	NA	NA	None	None	NA
SMIM1	-0.511415	0.799479	0.896675	None	None	0.0971928
LRRC47	-0.354318	0.124883	0.297955	None	None	0.903498
CEP104	-0.868357	0.0346386	0.130635	None	None	1.46044
DFFB	-0.860467	0.16014	0.347585	None	None	0.795499
C1orf174	-0.540147	0.148792	0.331675	None	None	0.827419
LINC01134	-1.07712	0.475533	0.677346	None	None	0.322819
LINC02780	NA	NA	NA	None	None	NA
AL805961.1	NA	NA	NA	None	None	NA
AJAP1	NA	NA	NA	None	None	NA
Z98886.1	NA	NA	NA	None	None	NA
AL365255.1	NA	NA	NA	None	None	NA
NPHP4	0.171683	0.905279	0.954035	None	None	0.0432176
KCNAB2	0.086099	0.964936	0.983737	None	None	0.0155016
CHD5	-2.20109	0.585268	NA	None	None	0.232645
RPL22	0.0198424	0.935177	0.968991	None	None	0.029106
RNF207	0.523821	0.172296	0.363789	None	None	0.763724
ICMT	0.6375	0.014092	0.0712564	None	None	1.85103
LINC00337	0.221062	0.618363	0.783048	None	None	0.208756
GPR153	-1.73345	0.302941	0.514893	None	None	0.518642
ACOT7	1.31697	0.00100099	0.0104926	None	None	2.99957
AL031848.2	1.32251	0.29605	0.507714	None	None	0.528635
HES2	1.1804	0.000773079	0.00864043	None	None	3.11178
ESPN	1.10297	0.00337956	0.0258062	None	None	2.47114
AL031848.1	NA	NA	NA	None	None	NA
TNFRSF25	-1.41447	0.00578077	0.0377942	None	None	2.23801
PLEKHG5	-0.46022	0.372647	0.583557	None	None	0.428703
NOL9	0.318076	0.256605	0.463825	None	None	0.590735
TAS1R1	0.908019	0.738441	NA	None	None	0.131684
ZBTB48	-0.392994	0.145766	0.327501	None	None	0.836344
KLHL21	0.690927	0.054058	0.174523	None	None	1.26714
PHF13	0.426554	0.293254	0.505031	None	None	0.532757
THAP3	0.217089	0.538875	0.726775	None	None	0.268512
DNAJC11	0.823399	0.000852795	0.00927954	None	None	3.06916
LINC01672	NA	NA	NA	None	None	NA
AL591163.1	-5.27392	0.0111903	0.0606252	None	None	1.95116
CAMTA1-DT	-0.64327	0.16914	0.35982	None	None	0.771754
CAMTA1	0.046576	0.88298	0.94194	None	None	0.0540492
AL512330.1	-7.01161	0.00498633	0.0341696	None	None	2.30222
Z97987.1	-4.57482	0.244581	0.449978	None	None	0.611577
VAMP3	-0.584477	0.0260645	0.10847	None	None	1.58395
Z98884.2	NA	NA	NA	None	None	NA
PER3	-0.474807	0.484698	0.684269	None	None	0.314529
Z98884.1	0.840533	0.822635	NA	None	None	0.0847928
UTS2	NA	NA	NA	None	None	NA
TNFRSF9	0.67676	0.868272	NA	None	None	0.061344
PARK7	0.347832	0.0899394	0.242669	None	None	1.04605
AL034417.4	-1.64615	0.00101572	0.0106091	None	None	2.99322
AL034417.3	-1.2158	0.0242583	0.103324	None	None	1.61514
ERRFI1	-1.28404	0.000159769	0.00248838	None	None	3.79651
AL034417.2	-2.07981	0.000870624	0.0094187	None	None	3.06017
LINC01714	-3.34959	0.00291983	0.0232366	None	None	2.53464
SLC45A1	-6.40834	7.55288e-05	0.00136798	None	None	4.12189
RERE	-0.180285	0.365213	0.57597	None	None	0.437454
RERE-AS1	-0.627927	0.153516	0.338526	None	None	0.813848
AL357552.2	NA	NA	NA	None	None	NA
ENO1	-0.292072	0.154972	0.340322	None	None	0.809748
ENO1-AS1	NA	NA	NA	None	None	NA
CA6	NA	NA	NA	None	None	NA
SLC2A7	-3.80264	0.335582	NA	None	None	0.474202
SLC2A5	0.809045	0.503884	0.700112	None	None	0.297669
GPR157	0.408804	0.0770442	0.220656	None	None	1.11326
MIR34AHG	0.0892673	0.719635	0.850096	None	None	0.142888
LNCTAM34A	0.0426757	0.927047	0.964556	None	None	0.0328981
H6PD	-1.29256	0.0169128	0.0806839	None	None	1.77179
SPSB1	1.12597	0.014538	0.0729068	None	None	1.8375
LINC02606	-2.20109	0.585268	NA	None	None	0.232645
SLC25A33	0.424262	0.136199	0.313748	None	None	0.865825
TMEM201	1.08634	0.0343722	0.129944	None	None	1.46379
PIK3CD	1.21885	0.143618	0.32458	None	None	0.84279
PIK3CD-AS2	0.608685	0.602715	0.772996	None	None	0.219888
CLSTN1	0.214361	0.491429	0.690049	None	None	0.308539
CTNNBIP1	-0.280973	0.608192	0.777004	None	None	0.215959
AL357140.1	NA	NA	NA	None	None	NA
AL357140.4	-1.07663	0.292643	0.50457	None	None	0.533662
LZIC	-0.461345	0.0890941	0.241132	None	None	1.05015
AL357140.2	NA	NA	NA	None	None	NA
NMNAT1	0.461617	0.131648	0.307796	None	None	0.880587
RBP7	-0.285021	0.944313	NA	None	None	0.024884
UBE4B	0.131145	0.630801	0.791846	None	None	0.200108
KIF1B	-0.110204	0.602175	0.772598	None	None	0.220277
AL139424.3	-1.94468	0.0919119	0.246229	None	None	1.03663
AL139424.2	-4.96424	0.0467743	0.158566	None	None	1.32999
PGD	0.950946	0.00273673	0.0220616	None	None	2.56277
AL139424.1	NA	NA	NA	None	None	NA
CENPS	-0.0524109	0.9342	0.968541	None	None	0.0295603
CORT	-4.75962	0.182952	0.377593	None	None	0.737662
DFFA	0.108847	0.579916	0.756917	None	None	0.236635
AL354956.1	NA	NA	NA	None	None	NA
PEX14	0.384531	0.171891	0.363219	None	None	0.764747
AL139423.2	-2.86276	0.087543	0.238714	None	None	1.05778
CASZ1	0.177343	0.865796	0.931565	None	None	0.0625843
AL139423.1	NA	NA	NA	None	None	NA
C1orf127	0.67676	0.868272	NA	None	None	0.061344
TARDBP	0.352049	0.0407802	0.144912	None	None	1.38955
MASP2	-1.74104	0.179867	0.373453	None	None	0.745048
AL109811.2	0.00385897	0.992531	0.996936	None	None	0.00325592
SRM	1.89119	2.19133e-09	2.55456e-07	None	None	8.65929
EXOSC10	0.0167952	0.940455	0.971253	None	None	0.0266617
AL109811.1	0.121277	0.726661	0.854353	None	None	0.138668
EXOSC10-AS1	NA	NA	NA	None	None	NA
MTOR	0.763402	0.00567773	0.0374011	None	None	2.24583
MTOR-AS1	-3.82978	0.314831	0.525903	None	None	0.501922
ANGPTL7	-0.795567	0.703736	0.840455	None	None	0.15259
UBIAD1	0.339978	0.236591	0.441191	None	None	0.626001
AL031291.1	0.67676	0.868272	NA	None	None	0.061344
DISP3	NA	NA	NA	None	None	NA
LINC01647	NA	NA	NA	None	None	NA
AL031731.1	NA	NA	NA	None	None	NA
FBXO2	NA	NA	NA	None	None	NA
FBXO44	-0.973938	0.467582	0.670034	None	None	0.330142
FBXO6	-1.25822	0.387328	0.597636	None	None	0.411921
MAD2L2	0.392797	0.867105	0.931998	None	None	0.0619285
DRAXIN	-3.98617	0.312165	NA	None	axon guidance	0.505616
AGTRAP	-0.590235	0.0872332	0.238161	None	None	1.05932
C1orf167	NA	NA	NA	None	None	NA
MTHFR	0.191049	0.561137	0.742891	None	None	0.250931
CLCN6	0.422784	0.0712042	0.210192	None	None	1.14749
NPPA	-0.250205	0.658664	0.811492	None	None	0.181336
NPPB	-2.66899	0.12422	0.296814	None	None	0.905808
AL021155.5	-4.35096	3.44104e-09	3.69768e-07	None	None	8.46331
KIAA2013	-0.0975905	0.720911	0.850889	None	None	0.142118
PLOD1	-0.00301416	0.991961	0.99682	None	None	0.00350544
AL096840.2	-5.37779	0.0230452	0.0997692	None	None	1.63742
MFN2	-0.345768	0.266074	0.474784	None	None	0.574998
MIIP	-0.917213	0.00271731	0.0219612	None	None	2.56586
TNFRSF8	0.382804	0.695953	0.835674	None	None	0.15742
TNFRSF1B	1.48309	0.00358869	0.0269958	None	None	2.44506
VPS13D	0.606386	0.00533306	0.0357676	None	None	2.27302
DHRS3	-0.468795	0.504575	0.700577	None	None	0.297074
C1orf158	NA	NA	NA	None	None	NA
PRAMEF18	NA	NA	NA	None	None	NA
LRRC38	NA	NA	NA	None	None	NA
PDPN	NA	NA	NA	None	None	NA
PRDM2	-0.0229614	0.900185	0.951229	None	None	0.0456682
KAZN	0.0445552	0.898907	0.950706	None	None	0.046285
AL357873.1	-1.74116	0.000735041	0.00829725	None	None	3.13369
KAZN-AS1	-1.48139	0.010214	0.0566987	None	None	1.99081
AL031293.1	-5.24892	0.00836768	0.049329	None	None	2.07739
TMEM51-AS1	-3.5262	0.00142529	0.0135385	None	None	2.8461
TMEM51	-0.459455	0.269136	0.477985	None	None	0.570029
C1orf195	-4.66831	4.70403e-06	0.000149805	None	None	5.32753
FHAD1	-0.113777	0.878464	0.939258	None	None	0.0562761
AL031283.2	NA	NA	NA	None	None	NA
AL031283.1	-2.20109	0.585268	NA	None	None	0.232645
EFHD2	-0.824716	0.134248	0.311416	None	None	0.872092
CTRC	-4.4192	0.12847	0.303167	None	calcium ion homeostasis	0.891199
CELA2A	-7.01758	0.0134452	0.0688549	None	None	1.87143
CELA2B	-2.25359	0.0199296	0.0901567	None	None	1.7005
CASP9	-0.926951	0.0102525	0.056881	None	None	1.98917
DNAJC16	-0.0943626	0.687372	0.830503	None	None	0.162808
AGMAT	-0.324252	0.506272	0.701476	None	None	0.295616
AL121992.1	-4.65144	0.0904066	0.243724	None	None	1.0438
DDI2	-0.236105	0.147259	0.329594	None	None	0.831917
PLEKHM2	-0.621941	0.00157819	0.0146284	None	None	2.80184
AL450998.3	-0.610253	0.169543	0.360348	None	None	0.770721
SLC25A34	-4.25177	4.8322e-05	0.000962188	None	None	4.31585
SLC25A34-AS1	NA	NA	NA	None	None	NA
TMEM82	NA	NA	NA	None	None	NA
FBLIM1	0.708691	0.0751878	0.217405	None	None	1.12385
UQCRHL	NA	NA	NA	None	None	NA
AL450998.2	-0.418208	0.206411	0.406254	None	None	0.685267
SPEN	0.517836	0.0675616	0.202453	None	None	1.1703
ZBTB17	0.328216	0.209056	0.409032	None	None	0.679737
HSPB7	-2.15413	0.484916	NA	None	None	0.314334
CLCNKA	NA	NA	NA	None	None	NA
EPHA2	0.00799324	0.980072	0.990994	None	None	0.00874197
AL451042.2	NA	NA	NA	None	None	NA
AL451042.1	-1.61063	0.663644	NA	None	None	0.178065
ARHGEF19	-1.24869	0.751449	NA	None	None	0.124101
AL109627.1	0.67676	0.868272	NA	None	None	0.061344
CPLANE2	-4.57482	0.244581	0.449978	None	None	0.611577
FBXO42	-0.264874	0.301752	0.514192	None	None	0.520349
SZRD1	0.534372	0.0172092	0.0817022	None	None	1.76424
SPATA21	-0.249807	0.533279	0.723118	None	None	0.273046
NECAP2	-0.671549	0.00349742	0.0265062	None	None	2.45625
LINC01772	-0.646155	0.178847	0.372348	None	None	0.747519
AL137802.2	-3.70126	0.012247	0.0647767	None	None	1.91197
NBPF1	-0.0544762	0.829135	0.913112	None	None	0.0813748
AL137798.2	NA	NA	NA	None	None	NA
AL021920.3	NA	NA	NA	None	None	NA
CROCC	0.392007	0.262708	0.470765	None	None	0.580526
BX284668.2	NA	NA	NA	None	None	NA
BX284668.5	-1.05966	0.495943	0.693477	None	None	0.304568
BX284668.6	-1.08778	0.492058	0.690604	None	None	0.307984
MFAP2	2.37184	0.140797	0.320566	None	None	0.851406
AL049569.1	0.642872	0.137483	0.315796	None	None	0.861753
ATP13A2	1.13749	3.44103e-07	1.74639e-05	None	None	6.46331
SDHB	0.347746	0.146035	0.32796	None	None	0.835544
PADI2	-1.24697	0.260979	0.468628	None	None	0.583394
PADI1	-4.02582	4.96807e-16	5.1837e-13	None	None	15.3038
PADI3	-6.00613	0.00484979	0.0334462	None	None	2.31428
PADI4	NA	NA	NA	None	None	NA
PADI6	NA	NA	NA	None	None	NA
RCC2	0.28252	0.281828	0.492171	None	None	0.550016
ARHGEF10L	0.785636	0.066017	0.199378	None	None	1.18034
LINC02810	NA	NA	NA	None	None	NA
LINC01654	NA	NA	NA	None	None	NA
IGSF21	NA	NA	NA	None	None	NA
PAX7	NA	NA	NA	None	None	NA
ALDH4A1	0.0989723	0.803768	0.898886	None	None	0.0948692
IFFO2	-0.0966872	0.756336	0.871876	None	None	0.121285
AL137127.1	NA	NA	NA	None	None	NA
UBR4	0.636602	0.00176236	0.0159261	None	None	2.75391
EMC1-AS1	-0.18558	0.46466	0.667382	None	None	0.332865
EMC1	0.174863	0.449732	0.654654	None	None	0.347046
MRTO4	0.61165	0.00962304	0.054393	None	None	2.01669
AKR7A3	-5.30865	0.0992429	0.258757	None	None	1.0033
AKR7A2	-0.282746	0.296681	0.508389	None	None	0.52771
SLC66A1	0.240259	0.438288	0.644334	None	None	0.35824
CAPZB	0.431671	0.00466481	0.0325336	None	None	2.33117
MICOS10	-0.248373	0.282442	0.492585	None	None	0.54907
AL031727.2	NA	NA	NA	None	None	NA
NBL1	-3.51759	0.121605	0.292903	None	None	0.915048
HTR6	NA	NA	NA	None	None	NA
TMCO4	0.557751	0.168371	0.358664	None	None	0.773731
OTUD3	0.455334	0.0774777	0.221286	None	None	1.11082
PLA2G2D	NA	NA	NA	None	None	NA
Z98257.1	1.31126	0.609601	0.777534	None	None	0.214954
PLA2G2C	NA	NA	NA	None	None	NA
UBXN10	NA	NA	NA	None	None	NA
CAMK2N1	-1.21228	0.246048	0.451037	None	None	0.608981
MUL1	0.0980793	0.742107	0.863181	None	None	0.129533
CDA	-0.482916	0.560612	0.742553	None	None	0.251338
PINK1	-0.328674	0.25959	0.467005	None	None	0.585712
PINK1-AS	-0.10206	0.838228	0.917766	None	None	0.0766377
DDOST	0.166991	0.518678	0.711712	None	None	0.285102
KIF17	-0.233894	0.695076	0.835194	None	None	0.157968
SH2D5	-0.638688	0.223332	0.425242	None	None	0.651048
AL663074.1	NA	NA	NA	None	None	NA
HP1BP3	-0.44865	0.0466594	0.15826	None	None	1.33106
EIF4G3	0.948294	0.000436183	0.00550163	None	None	3.36033
AL031005.2	NA	NA	NA	None	None	NA
ECE1	-1.64146	1.73974e-06	6.65288e-05	None	axon guidance	5.75951
AL031005.1	NA	NA	NA	None	None	NA
AL031728.1	-6.23493	0.0239154	0.102225	None	None	1.62132
NBPF3	0.166445	0.540136	0.727368	None	None	0.267497
LINC02596	NA	NA	NA	None	None	NA
RAP1GAP	-0.145647	0.665611	0.815127	None	None	0.176779
USP48	0.19012	0.365911	0.576626	None	None	0.436625
LDLRAD2	NA	NA	NA	None	None	NA
HSPG2	0.176709	0.70243	0.839782	None	None	0.153397
CELA3B	0.67676	0.868272	NA	None	None	0.061344
CELA3A	NA	NA	NA	None	None	NA
LINC01635	NA	NA	NA	None	None	NA
LINC00339	-1.16596	0.0509062	0.168186	None	None	1.29323
CDC42	0.105596	0.536139	0.724374	None	None	0.270722
CDC42-AS1	-1.263	0.00512381	0.0347888	None	None	2.29041
CDC42-IT1	0.924853	0.00841054	0.049473	None	None	2.07518
WNT4	-0.888961	0.097046	0.25515	None	None	1.01302
AL445253.1	-4.13764	0.00239295	0.0200327	None	None	2.62107
ZBTB40	0.72326	0.0017881	0.0160795	None	None	2.74761
EPHB2	-1.4875	0.0934949	0.249393	None	synapse organization	1.02921
TEX46	-1.24679	0.759946	NA	None	None	0.119217
KDM1A	-0.179759	0.487761	0.687181	None	None	0.311793
AL031428.1	-0.583432	0.0424658	0.148601	None	None	1.37196
LUZP1	0.585255	0.000832824	0.00911227	None	None	3.07945
HTR1D	-1.24679	0.759946	NA	None	None	0.119217
LINC01355	1.119	0.000370433	0.00483398	None	None	3.43129
AL109936.6	0.390037	0.342913	0.554047	None	None	0.464816
HNRNPR	0.636679	0.00184304	0.0164429	None	None	2.73446
ZNF436	0.635784	0.0443678	0.152969	None	None	1.35293
ZNF436-AS1	-0.242152	0.487063	0.686559	None	None	0.312415
TCEA3	0.00646458	0.992969	0.997016	None	None	0.00306427
ASAP3	0.422958	0.463937	0.666654	None	None	0.333541
E2F2	-0.586018	0.418535	0.626792	None	None	0.378268
AL021154.1	NA	NA	NA	None	None	NA
ID3	0.544068	0.329242	0.539758	None	None	0.482484
AL450043.1	-0.999702	0.167912	0.358228	None	None	0.774919
MDS2	-0.577718	0.315872	0.526971	None	None	0.500489
RPL11	-0.00498434	0.98301	0.992779	None	None	0.00744196
ELOA-AS1	0.318979	0.25019	0.455849	None	None	0.60173
ELOA	0.716302	0.0181141	0.0846922	None	None	1.74198
PITHD1	-0.299801	0.232384	0.436898	None	None	0.633794
LYPLA2	-0.0854967	0.793456	0.893274	None	None	0.100477
GALE	-1.29336	0.000648916	0.00751971	None	None	3.18781
HMGCL	-0.796256	0.00284386	0.022745	None	None	2.54609
FUCA1	0.112981	0.685516	0.829094	None	None	0.163982
CNR2	-4.14502	0.258091	0.465309	None	None	0.588227
PNRC2	0.221305	0.273547	0.482989	None	None	0.562968
SRSF10	-0.030053	0.851953	0.924583	None	None	0.0695846
AL591178.1	0.67676	0.868272	NA	None	None	0.061344
MYOM3	NA	NA	NA	None	None	NA
IL22RA1	NA	NA	NA	None	None	NA
IFNLR1	-0.381493	0.237987	0.442972	None	None	0.623447
AL138902.1	-1.86556	0.0630649	0.1931	None	None	1.20021
GRHL3	-0.475632	0.279921	0.489896	None	None	0.552964
STPG1	-0.253113	0.402453	0.612193	None	None	0.395285
NIPAL3	0.616456	0.215986	0.417034	None	None	0.665574
RCAN3AS	-0.503532	0.109714	0.274929	None	None	0.959737
RCAN3	0.324819	0.171454	0.362767	None	None	0.765852
NCMAP-DT	-4.48419	0.0912562	0.245224	None	None	1.03974
NCMAP	-0.477235	0.417081	0.625589	None	None	0.37978
SRRM1	-0.335189	0.218129	0.419319	None	None	0.661287
AL445648.1	-2.04609	0.0849372	0.234122	None	None	1.0709
CLIC4	0.775046	0.00155207	0.0144672	None	None	2.80909
RUNX3	5.64837	0.000939315	0.00996015	None	None	3.02719
AL050344.1	NA	NA	NA	None	None	NA
AL031432.1	0.67676	0.868272	NA	None	None	0.061344
SYF2	-0.223843	0.353941	0.564656	None	None	0.451069
AL031432.4	-0.162654	0.792782	0.893086	None	None	0.100846
AL031432.5	-2.00337	0.620987	NA	None	None	0.206917
RSRP1	-0.620214	0.0141699	0.0715749	None	None	1.84863
AL031432.3	-1.24679	0.759946	NA	None	None	0.119217
RHD	-1.24167	0.0533477	0.173121	None	None	1.27288
TMEM50A	-0.011936	0.954403	0.978881	None	None	0.0202684
RHCE	-1.16617	0.0502911	0.166707	None	None	1.29851
MACO1	-0.185594	0.539191	0.727048	None	None	0.268257
LDLRAP1	-0.0664211	0.804297	0.89926	None	None	0.0945834
AL606491.1	-3.397	0.293904	0.505702	None	None	0.531795
MAN1C1	-0.252578	0.506602	0.701699	None	None	0.295333
AL031280.1	-1.39941	0.00507125	0.0345416	None	None	2.29488
SELENON	0.183334	0.468858	0.671068	None	None	0.328959
AL020996.1	-1.53317	0.174488	0.366645	None	None	0.758235
MTFR1L	-0.252045	0.395738	0.605522	None	None	0.402593
AUNIP	0.970357	0.0366128	0.135484	None	None	1.43637
AL033528.2	-0.262607	0.556571	0.739718	None	None	0.254479
PAQR7	-0.095732	0.79906	0.896467	None	None	0.0974205
STMN1	-0.642645	0.170537	0.361718	None	None	0.768183
PAFAH2	-0.0648592	0.833381	0.915663	None	None	0.0791565
EXTL1	-0.662185	0.397996	0.607768	None	None	0.400122
SLC30A2	0.549632	0.115118	0.283302	None	None	0.938859
AL391650.2	-0.0913283	0.870805	0.934602	None	None	0.060079
TRIM63	-4.57084	0.00149647	0.0140687	None	None	2.82493
PDIK1L	-0.0548257	0.911656	0.9575	None	None	0.0401688
FAM110D	NA	NA	NA	None	None	NA
C1orf232	NA	NA	NA	None	None	NA
AL391650.1	NA	NA	NA	None	None	NA
ZNF593	0.464051	0.201073	0.400294	None	None	0.696646
CNKSR1	-0.287319	0.33133	0.541942	None	None	0.479739
CATSPER4	NA	NA	NA	None	None	NA
CEP85	-0.583882	0.0263538	0.109368	None	None	1.57916
SH3BGRL3	-1.38117	4.40261e-06	0.000142088	None	None	5.35629
UBXN11	1.16142	0.0021254	0.0183492	None	None	2.67256
CD52	-0.0980379	0.803193	0.898481	None	None	0.0951801
CRYBG2	0.799888	0.000966412	0.0101969	None	None	3.01484
ZNF683	NA	NA	NA	None	None	NA
LIN28A	NA	NA	NA	None	None	NA
DHDDS	0.511415	0.054497	0.175527	None	None	1.26363
AL513365.2	-0.436827	0.139011	0.317864	None	None	0.856951
HMGN2	0.21583	0.32106	0.532195	None	None	0.493413
RPS6KA1	0.763777	0.137544	0.315901	None	None	0.861557
AL512408.1	NA	NA	NA	None	None	NA
ARID1A	0.714895	7.7093e-05	0.00139238	None	None	4.11299
PIGV	-0.967628	0.0332158	0.127272	None	None	1.47866
ZDHHC18	-0.130312	0.628726	0.790059	None	None	0.201539
SFN	-1.35571	0.00605518	0.0390945	None	None	2.21787
GPN2	0.460094	0.101598	0.262242	None	None	0.993117
GPATCH3	-0.0894617	0.807226	0.90089	None	None	0.093005
NUDC	0.383378	0.0861267	0.236191	None	None	1.06486
KDF1	-0.286602	0.43673	0.643199	None	None	0.359787
TRNP1	-3.94764	0.00299802	0.0236631	None	None	2.52317
TENT5B	-0.204121	0.711843	0.845204	None	None	0.147616
SLC9A1	0.641914	0.00438681	0.0311252	None	None	2.35785
WDTC1	-0.147684	0.694628	0.834968	None	None	0.158248
TMEM222	-0.029427	0.896995	0.949929	None	None	0.04721
SYTL1	-2.43814	2.42289e-05	0.000555474	None	None	4.61567
MAP3K6	-5.47895	6.85739e-06	0.000203552	None	None	5.16384
FCN3	NA	NA	NA	None	None	NA
CD164L2	-1.24679	0.759946	NA	None	None	0.119217
GPR3	NA	NA	NA	None	None	NA
WASF2	-0.535678	0.00249015	0.0206546	None	None	2.60377
FO393419.2	-0.91267	0.0583772	0.183239	None	None	1.23376
BX293535.1	-4.98718	0.144219	0.325287	None	None	0.840978
AHDC1	-1.01057	0.000360284	0.00473364	None	None	3.44336
FGR	NA	NA	NA	None	None	NA
LINC02574	NA	NA	NA	None	None	NA
IFI6	0.258319	0.178173	0.371549	None	None	0.749157
AL445490.1	-0.815428	0.13372	0.310667	None	None	0.873802
AL020997.5	-5.2865	0.0380017	0.138729	None	None	1.4202
FAM76A	-0.206726	0.536647	0.724889	None	None	0.270311
STX12	0.541909	0.00346974	0.0263276	None	None	2.4597
AL020997.2	-0.357045	0.842174	0.919666	None	None	0.0745981
AL020997.3	NA	NA	NA	None	None	NA
AL020997.4	-4.86	0.00220942	0.0189217	None	None	2.65572
PPP1R8	0.395367	0.131323	0.307206	None	None	0.881659
THEMIS2	-3.60435	0.116093	0.284646	None	None	0.935193
RPA2	0.115449	0.693834	0.834517	None	None	0.158744
SMPDL3B	1.80188	0.0926053	0.247604	None	None	1.03336
AL512288.1	0.642429	0.643939	0.801821	None	None	0.191155
XKR8	0.774197	0.102039	0.262859	None	None	0.991235
EYA3	0.774604	0.00129625	0.0126797	None	None	2.88731
PTAFR	0.303381	0.572962	0.752385	None	None	0.241874
DNAJC8	-0.116525	0.532556	0.722883	None	None	0.273635
ATP5IF1	-0.399309	0.0570606	0.180342	None	None	1.24366
AL353622.1	-0.166947	0.750059	0.868112	None	None	0.124904
AL353622.2	NA	NA	NA	None	None	NA
SESN2	-0.218469	0.306332	0.51805	None	None	0.513808
MED18	-0.337005	0.372113	0.583103	None	None	0.429326
PHACTR4	0.288518	0.413793	0.622795	None	None	0.383217
RCC1	1.65832	5.55688e-08	3.80379e-06	None	None	7.25517
SNHG3	0.934302	0.00197122	0.0172848	None	None	2.70527
TRNAU1AP	-0.50076	0.0266444	0.110145	None	None	1.57439
SNHG12	0.296725	0.395214	0.604957	None	None	0.403168
TAF12	0.296635	0.214333	0.415503	None	None	0.668912
RAB42	-1.24679	0.759946	NA	None	None	0.119217
LINC01715	0.924123	0.337345	0.548321	None	None	0.471926
AL360012.1	-7.23304	2.20555e-07	1.21142e-05	None	None	6.65648
GMEB1	0.760231	0.0109248	0.0597663	None	None	1.96159
YTHDF2	0.663968	0.00209066	0.0180899	None	None	2.67972
OPRD1	2.18583	0.31845	0.529878	None	None	0.496958
EPB41	0.74916	0.0234859	0.101108	None	None	1.62919
TMEM200B	-1.24679	0.759946	NA	None	None	0.119217
AL357500.1	-5.6325	0.0199947	0.0903352	None	None	1.69908
SRSF4	0.248705	0.118458	0.288132	None	None	0.926435
MECR	0.329021	0.385309	0.595755	None	None	0.414191
PTPRU	-0.623888	0.103849	0.265728	None	None	0.983599
LINC01756	-5.44977	0.0250168	0.105515	None	None	1.60177
MATN1	-3.84503	0.0185289	0.0856945	None	None	1.73215
MATN1-AS1	-5.50043	1.11977e-06	4.59251e-05	None	None	5.95087
SDC3	3.53773	5.02887e-09	5.11801e-07	None	None	8.29853
PUM1	0.770532	5.69755e-05	0.00108723	None	None	4.24431
NKAIN1	0.623459	0.670181	0.818315	None	None	0.173808
SNRNP40	0.263012	0.315639	0.526874	None	None	0.500809
ZCCHC17	0.0474168	0.880622	0.940572	None	None	0.0552104
AL451070.1	-0.633253	0.0373018	0.137098	None	None	1.42827
FABP3	-1.29019	0.287745	0.498853	None	None	0.540992
SERINC2	0.0769743	0.866618	0.931823	None	None	0.0621725
LINC01226	1.03656	0.0745015	0.216242	None	None	1.12783
AC114488.1	0.766828	0.7313	0.857107	None	None	0.135904
TINAGL1	0.611527	0.0855621	0.235247	None	None	1.06772
HCRTR1	-1.20786	0.415132	0.623968	None	calcium ion homeostasis	0.381814
PEF1	-0.224367	0.391477	0.601538	None	None	0.407294
AC114488.2	0.67676	0.868272	NA	None	None	0.061344
AC114488.3	NA	NA	NA	None	None	NA
COL16A1	-2.57236	0.305969	0.517526	None	None	0.514323
ADGRB2	-0.21936	0.924222	0.963545	None	None	0.0342237
SPOCD1	-2.81025	0.00139169	0.0132899	None	None	2.85646
AL354919.1	1.44184	0.721337	NA	None	None	0.141862
AL136115.2	1.19696	0.00873697	0.0508335	None	None	2.05864
PTP4A2	0.868716	5.3264e-05	0.00103488	None	None	4.27357
AL136115.1	-6.07582	0.0316523	0.123666	None	None	1.49959
AL136115.3	NA	NA	NA	None	None	NA
KHDRBS1	0.0321713	0.837242	0.91747	None	None	0.077149
AL445248.1	-0.664181	0.0588689	0.184468	None	None	1.23011
TMEM39B	0.460475	0.0603648	0.187458	None	None	1.21922
KPNA6	0.956777	3.67633e-05	0.000779054	None	None	4.43458
AL049795.2	NA	NA	NA	None	None	NA
TXLNA	0.125967	0.535965	0.724323	None	None	0.270864
CCDC28B	-0.600302	0.233644	0.437983	None	None	0.631445
AL049795.1	NA	NA	NA	None	None	NA
IQCC	-3.87222	0.000153806	0.00241507	None	None	3.81303
DCDC2B	-1.41207	0.0449375	0.154242	None	None	1.34739
TMEM234	-0.710628	0.0585475	0.183623	None	None	1.23249
EIF3I	0.381232	0.156237	0.341734	None	None	0.806217
FAM167B	NA	NA	NA	None	None	NA
LCK	-1.24679	0.759946	NA	None	calcium ion homeostasis	0.119217
HDAC1	-0.141308	0.439316	0.645303	None	None	0.357223
MARCKSL1	-2.40393	0.000633549	0.00737671	None	None	3.19822
TSSK3	-2.59369	0.0286293	0.115714	None	None	1.54319
FAM229A	0.234641	0.645368	0.802746	None	None	0.190192
BSDC1	0.0184773	0.915781	0.959844	None	None	0.0382082
ZBTB8B	0.556615	0.608807	0.77719	None	None	0.21552
ZBTB8A	-0.0187202	0.945922	0.974521	None	None	0.0241445
ZBTB8OS	0.61146	0.000292666	0.00399534	None	None	3.53363
RBBP4	-0.0794531	0.634949	0.7951	None	None	0.197261
SYNC	-0.826138	2.66728e-05	0.000600059	None	None	4.57393
AC114489.1	NA	NA	NA	None	None	NA
KIAA1522	-1.90085	1.73377e-05	0.000427005	None	None	4.76101
YARS	0.924101	0.00280053	0.0224451	None	None	2.55276
S100PBP	-1.16813	0.00619443	0.0397298	None	None	2.208
FNDC5	-6.31124	0.000698126	0.00797451	None	None	3.15607
HPCA	NA	NA	NA	None	None	NA
TMEM54	0.584144	0.130295	0.305744	None	None	0.885073
AL031602.2	-1.09218	0.0332539	0.127352	None	None	1.47816
RNF19B	0.0505662	0.866977	0.931998	None	None	0.0619924
AL020995.1	0.832249	0.0244057	0.103744	None	None	1.61251
AK2	1.0758	0.000848018	0.00924171	None	None	3.07159
AZIN2	0.237306	0.681726	0.826328	None	None	0.16639
TRIM62	0.470573	0.160429	0.347859	None	None	0.794716
AL662907.3	NA	NA	NA	None	None	NA
ZNF362	-0.590841	0.226709	0.429335	None	None	0.644531
AL513327.3	NA	NA	NA	None	None	NA
A3GALT2	-2.43403	0.539058	NA	None	None	0.268364
AL513327.1	-0.420024	0.102367	0.263451	None	None	0.989839
PHC2	0.603598	0.00342907	0.0261009	None	None	2.46482
AL513327.2	0.265703	0.509334	0.704161	None	None	0.292997
ZSCAN20	-0.273117	0.563269	0.744279	None	None	0.249284
CSMD2	-1.24679	0.759946	NA	None	None	0.119217
C1orf94	NA	NA	NA	None	None	NA
SMIM12	-0.0299031	0.909779	0.956314	None	None	0.0410642
GJB4	-3.83631	0.20883	0.408714	None	None	0.680206
GJB3	-4.48096	0.197486	0.395403	None	None	0.704464
DLGAP3	-1.24679	0.759946	NA	None	synapse organization	0.119217
TMEM35B	-0.828736	0.515689	0.709027	None	None	0.287612
ZMYM6	-0.760356	0.025065	0.10566	None	None	1.60093
ZMYM1	-0.287219	0.263032	0.471083	None	None	0.579991
AL590434.1	2.31178	0.519215	NA	None	None	0.284653
SFPQ	0.390028	0.00605902	0.039096	None	None	2.2176
ZMYM4	0.313331	0.214849	0.416092	None	None	0.667866
ZMYM4-AS1	-0.375123	0.188887	0.385664	None	None	0.723798
KIAA0319L	-0.140632	0.641052	0.799497	None	None	0.193106
NCDN	0.375897	0.414778	0.623642	None	None	0.382184
AC004865.2	-3.229	0.033448	0.127806	None	None	1.47563
TFAP2E	-0.745968	0.0320856	0.124756	None	None	1.49369
PSMB2	0.1786	0.431029	0.637718	None	None	0.365493
C1orf216	-1.52477	0.438229	0.644308	None	None	0.358299
CLSPN	0.389374	0.276781	0.486333	None	None	0.557864
AL354864.1	NA	NA	NA	None	None	NA
AGO4	-0.0761854	0.853824	0.92557	None	None	0.0686314
AGO1	1.13296	0.390156	0.600419	None	None	0.408762
AL139286.3	0.324572	0.775074	0.882981	None	None	0.110657
AL139286.2	NA	NA	NA	None	None	NA
AGO3	0.948969	0.00126082	0.0125175	None	None	2.89935
AL138787.2	0.312325	0.366888	0.577766	None	None	0.435466
ADPRHL2	-0.19311	0.408839	0.618192	None	None	0.388448
COL8A2	-3.0189	0.0731482	0.2136	None	None	1.1358
TRAPPC3	0.35554	0.063857	0.194731	None	None	1.19479
MAP7D1	0.282659	0.36665	0.577459	None	None	0.435748
THRAP3	0.385458	0.0890093	0.241038	None	None	1.05056
SH3D21	-0.316223	0.33341	0.544086	None	None	0.477022
EVA1B	2.03601	6.39418e-06	0.000193384	None	None	5.19422
AL591845.1	0.257856	0.635691	0.795648	None	None	0.196754
STK40	0.945304	0.00368173	0.0274915	None	None	2.43395
LSM10	0.956115	0.0258711	0.107936	None	None	1.58718
OSCP1	0.906893	0.0023272	0.0195731	None	None	2.63317
MRPS15	0.762341	0.00842712	0.0495402	None	None	2.07432
CSF3R	0.251797	0.443746	0.649479	None	None	0.352866
AL353604.1	NA	NA	NA	None	None	NA
LINC01137	0.069414	0.863905	0.930623	None	None	0.0635342
ZC3H12A	0.398386	0.215421	0.41634	None	None	0.666712
MEAF6	0.0501676	0.825696	0.910985	None	None	0.08318
SNIP1	-0.129124	0.558837	0.741479	None	None	0.252715
DNALI1	0.242385	0.888759	0.944935	None	None	0.0512159
GNL2	0.870955	0.00208892	0.0180829	None	None	2.68008
RSPO1	NA	NA	NA	None	None	NA
C1orf109	0.336251	0.25129	0.457376	None	None	0.599825
CDCA8	-0.433854	0.423646	0.631424	None	None	0.372997
EPHA10	-4.21013	0.285105	NA	None	axon guidance	0.544995
MANEAL	-2.66618	0.0372075	0.136973	None	None	1.42937
YRDC	0.879111	0.00984639	0.0552173	None	None	2.00672
C1orf122	0.396086	0.205974	0.405734	None	None	0.686189
MTF1	0.626438	0.0111581	0.0605241	None	None	1.95241
AL929472.2	NA	NA	NA	None	None	NA
INPP5B	0.674962	0.0175987	0.0830703	None	None	1.75452
SF3A3	0.190391	0.369635	0.580178	None	None	0.432226
FHL3	0.412675	0.428271	0.635414	None	None	0.368281
UTP11	0.887657	0.00166655	0.0152132	None	None	2.77818
POU3F1	-4.21013	0.285105	NA	None	None	0.544995
MIR3659HG	-0.707865	0.720923	0.850889	None	None	0.142111
LINC01685	NA	NA	NA	None	None	NA
AL354702.2	NA	NA	NA	None	None	NA
RRAGC	-0.287345	0.225853	0.428345	None	None	0.646175
AL139260.1	-0.856533	1.28354e-06	5.16502e-05	None	None	5.89159
MYCBP	-0.775726	0.00397312	0.0289152	None	None	2.40087
GJA9	-1.55124	1.78624e-06	6.79017e-05	None	None	5.74806
RHBDL2	-1.24952	2.03159e-05	0.000483323	None	None	4.69216
AKIRIN1	0.252841	0.441491	0.647213	None	None	0.355078
NDUFS5	-0.0122525	0.971084	0.986678	None	None	0.0127432
MACF1	0.153209	0.52261	0.714866	None	None	0.281822
AL356055.1	NA	NA	NA	None	None	NA
AL442071.2	-0.572056	0.100466	0.260722	None	None	0.99798
AL442071.1	-0.276302	0.575173	0.753846	None	None	0.240202
BMP8A	-0.485279	0.327658	0.538578	None	None	0.484579
PABPC4	1.09846	7.6221e-06	0.000220734	None	None	5.11793
PABPC4-AS1	0.198259	0.668474	0.8171	None	None	0.174915
HEYL	1.89087	0.637723	NA	None	None	0.195368
NT5C1A	NA	NA	NA	None	None	NA
HPCAL4	NA	NA	NA	None	None	NA
PPIE	-0.725647	0.0953888	0.252624	None	None	1.0205
BMP8B	-4.39817	0.0597678	0.186326	None	None	1.22353
OXCT2	NA	NA	NA	None	None	NA
AL033527.4	NA	NA	NA	None	None	NA
LINC02811	NA	NA	NA	None	None	NA
TRIT1	-0.0108616	0.973096	0.987441	None	None	0.0118443
MYCL	1.3896	0.189128	0.385695	None	None	0.723245
CAP1	0.540148	0.00815003	0.0484443	None	None	2.08884
PPT1	-0.339898	0.111539	0.277549	None	None	0.952573
RLF	-0.499375	0.00382133	0.0281817	None	None	2.41779
TMCO2	-4.95974	0.171866	0.363219	None	None	0.76481
AL050341.2	0.0320886	0.944997	0.973876	None	None	0.0245695
ZMPSTE24	1.08082	1.08172e-06	4.46499e-05	None	None	5.96589
COL9A2	0.205953	0.915917	0.959881	None	None	0.038144
SMAP2	0.0561054	0.902172	0.952185	None	None	0.0447105
AL031985.4	-5.65167	0.0197826	0.0897659	None	None	1.70372
ZFP69B	0.428264	0.91569	NA	None	None	0.0382517
AL031985.3	NA	NA	NA	None	None	NA
ZFP69	-1.50453	0.251495	0.457439	None	None	0.599471
AL603839.3	-1.05945	0.0553106	0.177131	None	None	1.25719
EXO5	-1.29846	0.396094	0.605826	None	None	0.402201
ZNF684	-0.597805	0.242791	0.448323	None	None	0.614767
AL356379.2	-1.24679	0.759946	NA	None	None	0.119217
RIMS3	-1.99724	0.533813	NA	None	None	0.272611
AL031289.1	-3.44966	0.104882	0.267382	None	None	0.9793
NFYC-AS1	-0.435725	0.27441	0.48389	None	None	0.561601
NFYC	0.762389	0.00448839	0.0316939	None	None	2.34791
KCNQ4	3.15185	0.0629162	0.192859	None	None	1.20124
CITED4	-0.784617	0.195249	0.392765	None	None	0.709411
AC119677.1	-2.97554	0.454845	NA	None	None	0.342137
CTPS1	1.4472	0.000220019	0.00319401	None	None	3.65754
SLFNL1-AS1	1.13839	0.00502112	0.0342973	None	None	2.2992
SLFNL1	1.06274	0.0542419	0.174969	None	None	1.26567
SCMH1	-0.302369	0.534434	0.723676	None	None	0.272106
AC093151.8	-0.328312	0.934851	NA	None	None	0.0292578
FOXO6	0.0713565	0.874055	0.936648	None	None	0.0584612
AC093151.2	-3.66685	0.138343	0.316903	None	None	0.859042
HIVEP3	0.412719	0.217623	0.418833	None	None	0.662294
AL158216.1	-0.285021	0.944313	NA	None	None	0.024884
GUCA2A	NA	NA	NA	None	None	NA
FOXJ3	-0.71523	0.00174335	0.0158176	None	None	2.75862
AC096540.1	NA	NA	NA	None	None	NA
RIMKLA	-4.49441	1.36975e-07	8.13184e-06	None	None	6.86336
ZMYND12	-4.98764	0.164656	0.354124	None	None	0.783422
PPCS	-0.448417	0.0600856	0.186984	None	None	1.22123
CCDC30	0.365452	0.16256	0.351252	None	None	0.788986
PPIH	-0.183887	0.439099	0.645151	None	None	0.357438
AC098484.4	-0.680867	0.0221605	0.0971639	None	None	1.65442
AC098484.2	NA	NA	NA	None	None	NA
YBX1	-0.100947	0.670613	0.818531	None	None	0.173528
CLDN19	-4.46333	0.10635	0.269979	None	sensory perception of light stimulus	0.973264
P3H1	-0.778949	0.0623584	0.19173	None	None	1.20511
C1orf50	-0.242596	0.408466	0.618026	None	None	0.388844
AC098484.1	NA	NA	NA	None	None	NA
TMEM269	-0.38413	0.198787	0.397306	None	None	0.701611
SVBP	0.471356	0.181348	0.375564	None	None	0.741487
ERMAP	-0.0872004	0.795901	0.894488	None	None	0.099141
AL512353.1	-1.54282	0.0222478	0.0973245	None	None	1.65271
ZNF691	-0.231617	0.65292	0.807747	None	None	0.18514
SLC2A1	-0.313464	0.383858	0.594431	None	None	0.415829
SLC2A1-AS1	-1.28953	0.00964258	0.0544075	None	None	2.01581
AC099795.1	-2.04765	0.0449856	0.154322	None	None	1.34693
FAM183A	-0.0681567	0.902994	0.952409	None	None	0.0443153
EBNA1BP2	0.370135	0.118831	0.288745	None	None	0.925071
CFAP57	-0.421741	0.390856	0.601112	None	None	0.407984
TMEM125	-0.56799	0.280683	0.490723	None	None	0.551784
C1orf210	0.445048	0.725351	0.853758	None	None	0.139452
TIE1	-1.53135	0.555838	0.739183	None	None	0.255052
MPL	NA	NA	NA	None	None	NA
AL139289.3	NA	NA	NA	None	None	NA
AL139289.2	0.147087	0.751037	0.868631	None	None	0.124339
CDC20	-0.0605686	0.884335	0.942728	None	None	0.0533833
ELOVL1	-0.168717	0.502069	0.698792	None	None	0.299236
MED8	-0.355972	0.170915	0.362026	None	None	0.767219
AL139289.1	-5.15301	0.189047	0.385664	None	None	0.72343
SZT2	0.311933	0.157274	0.34334	None	None	0.803343
HYI	0.00239675	0.998493	0.999362	None	None	0.000655056
HYI-AS1	NA	NA	NA	None	None	NA
PTPRF	-0.187085	0.550079	0.735081	None	None	0.259575
KDM4A	0.294619	0.185652	0.381031	None	None	0.731299
KDM4A-AS1	-0.0831304	0.790774	0.891957	None	None	0.101948
ST3GAL3	0.321966	0.534744	0.723874	None	None	0.271854
AL451062.1	-0.524396	0.35957	0.569949	None	None	0.444216
ARTN	NA	NA	NA	None	None	NA
AL357079.1	-3.09344	0.0244786	0.103962	None	None	1.61121
IPO13	1.05966	0.25591	0.463201	None	None	0.591912
DPH2	2.32599	0.0316405	0.123665	None	None	1.49976
ATP6V0B	0.478613	0.104163	0.266208	None	None	0.982288
B4GALT2	0.579959	0.316714	0.527766	None	None	0.499332
CCDC24	-0.655292	0.249241	0.454897	None	None	0.60338
AL139220.2	-0.60604	0.713511	0.846452	None	None	0.146599
DMAP1	-0.49456	0.290508	0.502096	None	None	0.536842
ERI3	0.36095	0.309896	0.521721	None	None	0.508784
RNF220	-0.927281	0.029563	0.118	None	None	1.52925
TMEM53	-0.263418	0.561282	0.742981	None	None	0.250819
ARMH1	-1.2048	0.00760576	0.0460632	None	None	2.11886
KIF2C	-0.589456	0.442386	0.64818	None	None	0.354198
AL592166.1	-0.83496	0.049559	0.16484	None	None	1.30488
RPS8	-0.112021	0.580998	0.757521	None	None	0.235825
BEST4	-1.24679	0.759946	NA	None	None	0.119217
PLK3	0.157352	0.515068	0.708476	None	None	0.288135
TCTEX1D4	-5.04572	0.000852936	0.00927954	None	None	3.06908
BTBD19	0.253854	0.349525	0.560306	None	None	0.456522
PTCH2	-1.15795	0.0057826	0.0377942	None	None	2.23788
EIF2B3	0.336883	0.294635	0.506191	None	None	0.530715
HECTD3	-0.79564	0.0139184	0.070629	None	None	1.85641
UROD	-0.884877	0.0289015	0.116312	None	None	1.53908
ZSWIM5	0.843695	0.0702272	0.208267	None	None	1.15349
LINC01144	NA	NA	NA	None	None	NA
HPDL	2.50813	0.00231115	0.0194893	None	None	2.63617
MUTYH	-0.257985	0.457386	0.661787	None	None	0.339717
TOE1	0.267204	0.45802	0.661937	None	None	0.339115
TESK2	-0.108556	0.724396	0.853052	None	None	0.140024
CCDC163	-4.43395	0.00407362	0.029435	None	None	2.39002
MMACHC	0.305142	0.548014	0.733597	None	None	0.261208
PRDX1	0.0323923	0.856145	0.926676	None	None	0.0674525
AKR1A1	0.330953	0.295411	0.506934	None	None	0.529574
NASP	0.187005	0.318152	0.529565	None	None	0.497366
CCDC17	0.461778	0.733342	0.858281	None	None	0.134693
GPBP1L1	0.351962	0.104813	0.267314	None	None	0.979585
TMEM69	0.445424	0.110724	0.276631	None	None	0.955757
IPP	0.0200257	0.954018	0.978825	None	None	0.0204436
AL604028.1	NA	NA	NA	None	None	NA
MAST2	1.38502	2.49787e-05	0.000568598	None	None	4.60243
PIK3R3	0.341052	0.20239	0.402	None	None	0.693811
AL358075.1	NA	NA	NA	None	None	NA
AL358075.2	NA	NA	NA	None	None	NA
TSPAN1	-5.05558	0.0163876	0.0789026	None	None	1.78548
P3R3URF	NA	NA	NA	None	None	NA
POMGNT1	-0.263125	0.349879	0.560401	None	None	0.456082
LURAP1	0.245227	0.63166	0.792356	None	None	0.199516
RAD54L	0.24951	0.695557	0.835409	None	None	0.157667
LRRC41	0.0490024	0.852482	0.924801	None	None	0.0693149
UQCRH	0.458617	0.029451	0.117847	None	None	1.5309
NSUN4	0.399303	0.103376	0.265187	None	None	0.985581
FAAH	0.456907	0.272806	0.482308	None	None	0.564146
DMBX1	NA	NA	NA	None	None	NA
MKNK1-AS1	-0.0245778	0.963618	0.983212	None	None	0.0160949
MKNK1	0.497984	0.0839683	0.232627	None	None	1.07588
MOB3C	0.67676	0.868272	NA	None	None	0.061344
ATPAF1	0.145308	0.675048	0.821603	None	None	0.170665
TEX38	-6.23585	0.0236904	0.101625	None	None	1.62543
EFCAB14-AS1	0.0405968	0.89048	0.945849	None	None	0.0503758
EFCAB14	0.424766	0.04677	0.158566	None	None	1.33003
CYP4B1	-4.2093	0.285203	NA	None	None	0.544846
CYP4Z1	NA	NA	NA	None	None	NA
CYP4A22-AS1	NA	NA	NA	None	None	NA
STIL	0.40597	0.249862	0.455597	None	None	0.6023
CMPK1	0.36968	0.111374	0.277354	None	None	0.953215
LINC01389	0.0437446	0.933124	0.968156	None	None	0.0300605
TRABD2B	NA	NA	NA	None	None	NA
LINC02794	NA	NA	NA	None	None	NA
AL109659.1	NA	NA	NA	None	None	NA
SLC5A9	NA	NA	NA	None	None	NA
SPATA6	-0.4233	0.818752	0.906793	None	None	0.0868478
AGBL4	1.13605	0.0885453	0.240153	None	None	1.05283
AL645507.1	NA	NA	NA	None	None	NA
AC099788.1	0.302772	0.868756	0.933006	None	None	0.0611021
AL590432.1	NA	NA	NA	None	None	NA
ELAVL4	NA	NA	NA	None	None	NA
DMRTA2	NA	NA	NA	None	None	NA
FAF1	0.0160312	0.960906	0.981963	None	None	0.017319
AL049637.1	-1.28238	0.0110925	0.0602892	None	None	1.95497
CDKN2C	-4.05019	0.128126	0.302695	None	None	0.892363
C1orf185	NA	NA	NA	None	None	NA
LINC01562	0.306968	0.801043	0.897419	None	None	0.0963439
RNF11	0.820448	7.0072e-06	0.000206698	None	None	5.15446
AL162430.2	0.118827	0.807497	0.901059	None	None	0.0928593
TTC39A	0.825758	0.0355792	0.133023	None	None	1.4488
TTC39A-AS1	0.411531	0.495714	0.693409	None	None	0.304769
EPS15	0.624381	0.00359277	0.0270099	None	None	2.44457
AC104170.2	-2.65151	0.0886137	0.240271	None	None	1.0525
AC104170.1	-0.950963	0.0769537	0.220531	None	None	1.11377
OSBPL9	-0.493731	0.0351995	0.132032	None	None	1.45346
NRDC	0.0821623	0.692911	0.834104	None	None	0.159323
AL050343.2	-4.37962	0.0386383	0.140148	None	None	1.41298
AL050343.3	NA	NA	NA	None	None	NA
RAB3B	1.05849	0.0462881	0.157389	None	None	1.33453
TXNDC12	0.218181	0.275276	0.484752	None	None	0.560231
KTI12	-0.0284629	0.95179	0.977296	None	None	0.0214588
AL445685.1	-0.282857	0.545507	0.731718	None	None	0.2632
TXNDC12-AS1	-5.21494	0.183707	0.378412	None	None	0.735873
BTF3L4	0.110582	0.642061	0.800185	None	None	0.192423
ZFYVE9	0.00506181	0.981194	0.991868	None	None	0.00824513
CC2D1B	-0.32725	0.188942	0.385664	None	None	0.723672
AL513218.1	NA	NA	NA	None	None	NA
AL513218.2	-0.652758	0.196538	0.39435	None	None	0.706554
ORC1	0.0581011	0.911569	0.957489	None	None	0.0402106
PRPF38A	-0.18681	0.324152	0.535382	None	None	0.489252
TUT4	-0.795637	0.00804848	0.0480486	None	None	2.09429
GPX7	-3.03296	0.235926	0.440564	None	None	0.627224
SHISAL2A	1.23064	0.661961	NA	None	None	0.179167
COA7	0.801275	0.0136719	0.0697877	None	None	1.86417
ZYG11B	-0.0514812	0.828587	0.912718	None	None	0.0816617
ZYG11A	1.15726	3.72136e-05	0.0007838	None	None	4.4293
ECHDC2	-0.8497	0.0116616	0.0624358	None	None	1.93324
SCP2	-0.181336	0.626727	0.789032	None	None	0.202922
PODN	NA	NA	NA	None	None	NA
CPT2	-0.402578	0.295318	0.506874	None	None	0.52971
AL606760.2	-1.36168	0.448723	0.653877	None	None	0.348022
CZIB	-0.439284	0.19183	0.388702	None	None	0.717082
AL606760.3	-4.62031	0.0102653	0.0569192	None	None	1.98863
MAGOH	0.384268	0.044862	0.154063	None	None	1.34812
AL606760.1	1.88705	0.000145334	0.00231225	None	None	3.83763
LRP8	2.92908	5.38986e-16	5.1837e-13	None	None	15.2684
AL355483.3	NA	NA	NA	None	None	NA
AL355483.1	0.67676	0.868272	NA	None	None	0.061344
AL355483.2	NA	NA	NA	None	None	NA
LINC01771	3.84506	0.013193	0.0681256	None	None	1.87966
AC119428.2	4.07825	0.295687	NA	None	None	0.529168
LINC02812	NA	NA	NA	None	None	NA
DMRTB1	NA	NA	NA	None	None	NA
GLIS1	1.59874	0.578808	0.756394	None	None	0.237466
NDC1	0.670642	0.00497352	0.0341152	None	None	2.30334
YIPF1	0.308792	0.231327	0.435536	None	None	0.635774
DIO1	-0.995724	0.0127092	0.0664297	None	None	1.89588
HSPB11	-0.491762	0.114028	0.281285	None	None	0.942989
LRRC42	0.0457076	0.867624	0.932341	None	None	0.0616685
LDLRAD1	NA	NA	NA	None	None	NA
TMEM59	-0.230629	0.272982	0.482389	None	None	0.563866
TCEANC2	-0.102164	0.789638	0.891243	None	None	0.102572
CYB5RL	0.108852	0.839206	0.918366	None	None	0.0761315
MRPL37	0.173245	0.559898	0.742375	None	None	0.251891
SSBP3	-0.141099	0.609015	0.777229	None	None	0.215372
SSBP3-AS1	NA	NA	NA	None	None	NA
AL161644.1	NA	NA	NA	None	None	NA
AL035415.1	NA	NA	NA	None	None	NA
AC099796.2	-2.46417	0.110707	0.276631	None	None	0.955825
ACOT11	-1.86129	3.63111e-05	0.000772615	None	None	4.43996
FAM151A	-6.09036	1.962e-06	7.33466e-05	None	None	5.7073
AL590093.1	NA	NA	NA	None	None	NA
MROH7	-0.66586	0.599461	0.770868	None	None	0.222239
TTC4	-0.137526	0.730797	0.856942	None	None	0.136203
PARS2	-0.378612	0.483918	0.68367	None	None	0.315228
TTC22	NA	NA	NA	None	None	NA
LEXM	NA	NA	NA	None	None	NA
DHCR24	0.380635	0.304289	0.515956	None	None	0.516713
AC096536.3	-0.110067	0.83359	0.915663	None	None	0.0790477
DHCR24-DT	NA	NA	NA	None	None	NA
AL590440.2	NA	NA	NA	None	None	NA
PCSK9	NA	NA	NA	None	None	NA
USP24	0.525461	0.157674	0.344018	None	None	0.802239
MIR4422HG	-4.44439	0.258576	NA	None	None	0.587412
AL603840.1	-0.252873	0.836016	0.916931	None	None	0.0777856
LINC01753	2.05887	0.481158	0.681552	None	None	0.317712
AL353681.1	-1.28414	0.560764	0.742627	None	None	0.25122
AC119674.1	1.08059	0.0200989	0.0906983	None	None	1.69683
LINC01767	NA	NA	NA	None	None	NA
PLPP3	0.968501	0.00326804	0.0251947	None	None	2.48571
PRKAA2	-0.922981	0.0742155	0.215767	None	None	1.12951
FYB2	-1.20864	0.553117	0.737502	None	None	0.257183
C8A	NA	NA	NA	None	None	NA
DAB1	1.38619	0.00384859	0.0282872	None	None	2.4147
AL445193.2	NA	NA	NA	None	None	NA
OMA1	-0.780942	0.145107	0.32664	None	None	0.838311
AL035411.3	-1.24679	0.759946	NA	None	None	0.119217
TACSTD2	-0.655654	0.00500096	0.0342447	None	None	2.30095
MYSM1	0.0924586	0.58135	0.757606	None	None	0.235562
AL136985.3	NA	NA	NA	None	None	NA
JUN	-1.83543	6.30039e-09	6.18306e-07	None	None	8.20063
LINC01135	-2.06977	1.74672e-05	0.000428062	None	None	4.75778
AL136985.1	-1.24679	0.759946	NA	None	None	0.119217
LINC02777	-1.24679	0.759946	NA	None	None	0.119217
LINC01358	-3.86111	0.0414723	0.146503	None	None	1.38224
AC093425.1	-3.93661	0.0974317	0.255885	None	None	1.0113
FGGY	-1.80866	0.000897753	0.00961098	None	None	3.04684
AL035416.1	-4.44593	0.245458	NA	None	None	0.610022
HOOK1	-0.567716	0.0275957	0.112985	None	None	1.55916
CYP2J2	-2.2403	2.05312e-06	7.54124e-05	None	None	5.68759
C1orf87	-5.63951	0.0247556	0.1047	None	None	1.60633
LINC02778	NA	NA	NA	None	None	NA
LINC01748	-1.01645	0.0522401	0.170809	None	None	1.282
AC099792.1	NA	NA	NA	None	None	NA
NFIA	-0.856268	0.171089	0.362198	None	None	0.766779
NFIA-AS2	1.93663	0.629323	NA	None	None	0.201126
AC099791.3	-2.58148	0.519158	NA	None	None	0.284701
AC099791.4	-2.58148	0.519158	NA	None	None	0.284701
TM2D1	-0.0436603	0.856371	0.926764	None	None	0.0673378
AC099791.2	-3.60775	0.358821	0.569043	None	None	0.445122
PATJ	-0.923389	0.0135404	0.0692627	None	None	1.86837
L1TD1	-0.268207	0.71761	0.848959	None	None	0.144111
KANK4	-0.199812	0.786309	0.889372	None	None	0.104407
USP1	-0.32195	0.266177	0.474901	None	None	0.57483
DOCK7	0.180376	0.484088	0.68376	None	None	0.315076
ANGPTL3	-6.9377	2.92572e-05	0.00064611	None	None	4.53377
AC103923.1	-0.813895	0.413755	0.622795	None	None	0.383257
ATG4C	0.185541	0.408228	0.618016	None	None	0.389097
LINC01739	NA	NA	NA	None	None	NA
LINC00466	-3.14347	0.181757	0.376046	None	None	0.740508
FOXD3-AS1	NA	NA	NA	None	None	NA
FOXD3	NA	NA	NA	None	None	NA
ALG6	-0.284924	0.455656	0.659931	None	None	0.341363
ITGB3BP	-1.47905	0.00267225	0.0216607	None	None	2.57312
BX004807.1	-1.5087	0.00417167	0.0300083	None	None	2.37969
EFCAB7	-2.61571	5.58159e-05	0.00106998	None	None	4.25324
DLEU2L	-4.68926	0.214049	0.415337	None	None	0.669487
PGM1	-0.12287	0.668702	0.817236	None	None	0.174768
ROR1	-0.122596	0.880056	0.940321	None	None	0.0554895
ROR1-AS1	-1.91338	0.191235	0.388238	None	None	0.718432
UBE2U	NA	NA	NA	None	None	NA
CACHD1	1.32787	0.714825	NA	None	None	0.1458
RAVER2	-0.612764	0.468134	0.670581	None	None	0.32963
JAK1	-0.214223	0.527189	0.718592	None	None	0.278034
AK4	-1.14043	3.24673e-09	3.54834e-07	None	None	8.48855
DNAJC6	1.4311	0.00249384	0.0206763	None	None	2.60313
AL139294.1	0.594919	0.296264	0.507951	None	None	0.528321
LEPROT	0.337113	0.0945756	0.251404	None	None	1.02422
LEPR	0.317643	0.284724	0.495222	None	None	0.545576
AC119800.1	1.44184	0.721337	NA	None	None	0.141862
PDE4B	1.37438	0.282384	0.492584	None	None	0.549159
AL590783.1	0.903	0.533733	0.723255	None	None	0.272676
SGIP1	0.14364	0.922623	0.962701	None	None	0.0349758
AL139147.1	NA	NA	NA	None	None	NA
WDR78	-0.275583	0.542617	0.729519	None	None	0.265507
MIER1	0.219446	0.38097	0.591927	None	None	0.41911
SLC35D1	-0.147929	0.805827	0.900121	None	None	0.093758
C1orf141	-0.285021	0.944313	NA	None	None	0.024884
IL23R	NA	NA	NA	None	None	NA
IL12RB2	0.226233	0.660665	0.812586	None	None	0.180019
SERBP1	0.354457	0.0486589	0.163118	None	None	1.31284
GADD45A	-0.664346	0.102336	0.263405	None	None	0.989973
GNG12	2.06316	2.96212e-10	4.34934e-08	None	None	9.5284
GNG12-AS1	0.928948	0.000413841	0.00526819	None	None	3.38317
DIRAS3	NA	NA	NA	None	None	NA
WLS	1.45243	0.0334114	0.127716	None	None	1.47611
RPE65	NA	NA	NA	None	None	NA
DEPDC1	0.0857262	0.898725	0.950617	None	None	0.0463731
AL138789.1	-3.56962	0.366928	NA	None	None	0.435419
DEPDC1-AS1	NA	NA	NA	None	None	NA
AL033530.1	-0.255646	0.744776	0.864769	None	None	0.127974
AL691520.1	-1.61971	0.685866	NA	None	None	0.163761
LINC01707	1.95121	0.606372	NA	None	None	0.217261
AL359894.1	NA	NA	NA	None	None	NA
LRRC7	-0.797884	0.0418884	0.147336	None	None	1.37791
LRRC40	-0.541961	0.107211	0.271164	None	None	0.969761
SRSF11	0.246757	0.18439	0.379391	None	None	0.734263
AL353771.1	-4.89057	0.212962	0.413974	None	None	0.671698
ANKRD13C	0.598995	0.000286312	0.00393409	None	None	3.54316
HHLA3	0.14311	0.67388	0.820828	None	None	0.171417
AL158839.1	-4.39397	0.103094	0.2646	None	None	0.986767
CTH	1.37939	0.00922708	0.0528066	None	None	2.03494
LINC01788	NA	NA	NA	None	None	NA
PTGER3	1.36566	0.235838	0.440465	None	None	0.627386
ZRANB2-AS1	-0.656292	0.0656688	0.198638	None	None	1.18264
ZRANB2	0.297567	0.0637502	0.194551	None	None	1.19552
ZRANB2-AS2	-1.46455	0.0111311	0.060431	None	None	1.95346
NEGR1	-3.20003	0.00458749	0.0321535	None	synapse organization	2.33842
AL513166.1	-6.83647	0.00731314	0.0448702	None	None	2.1359
AL583808.1	-0.994445	0.645611	0.802882	None	None	0.190029
LINC02796	NA	NA	NA	None	None	NA
LINC02797	-4.40397	0.263025	NA	None	None	0.580004
AL591463.1	0.67676	0.868272	NA	None	None	0.061344
LRRIQ3	-2.5474	0.0829601	0.230598	None	None	1.08113
FPGT	-1.32857	0.00657701	0.0414919	None	None	2.18197
TNNI3K	-1.48239	0.0216787	0.0956718	None	None	1.66397
AC093158.1	-5.14729	0.0128252	0.0668354	None	None	1.89194
ERICH3	NA	NA	NA	None	None	NA
CRYZ	-0.319594	0.462128	0.664998	None	None	0.335238
TYW3	0.52619	0.167074	0.357119	None	None	0.777091
SLC44A5	-0.147289	0.662741	0.813754	None	None	0.178656
ACADM	-0.424608	0.482167	0.68245	None	None	0.316802
RABGGTB	0.0532999	0.81465	0.904551	None	None	0.0890287
MSH4	-0.643721	0.134855	0.311987	None	None	0.870133
ASB17	-0.285021	0.944313	NA	None	None	0.024884
AC092813.1	1.39005	0.731138	NA	None	None	0.136001
ST6GALNAC3	-0.859996	0.817223	0.905903	None	None	0.0876593
ST6GALNAC5	-0.344142	0.893485	0.947616	None	None	0.0489125
AL035409.1	NA	NA	NA	None	None	NA
PIGK	0.0920603	0.782013	0.88735	None	None	0.106786
AK5	1.3416	0.131286	0.307206	None	None	0.881783
AC118549.1	1.07919	1.70757e-05	0.000422173	None	None	4.76762
USP33	0.9066	9.04519e-05	0.00158311	None	None	4.04358
MIGA1	0.605598	0.0577325	0.181987	None	None	1.23858
NEXN-AS1	-0.150274	0.737984	0.860885	None	None	0.131953
NEXN	0.603697	0.0299674	0.119243	None	None	1.52335
FUBP1	0.997499	1.73681e-06	6.65288e-05	None	None	5.76025
DNAJB4	-0.444632	0.158025	0.344432	None	None	0.801274
GIPC2	0.0195705	0.951682	0.977237	None	None	0.0215079
AC103591.3	-0.926626	0.270928	0.480038	None	None	0.567146
AC103591.4	NA	NA	NA	None	None	NA
AC096531.2	NA	NA	NA	None	None	NA
PTGFR	NA	NA	NA	None	None	NA
ADGRL4	2.27436	0.568727	NA	None	None	0.245096
AC099671.1	NA	NA	NA	None	None	NA
AL606519.1	NA	NA	NA	None	None	NA
AL136234.1	1.32792	0.00576626	0.0377516	None	None	2.23911
LINC01781	0.0427463	0.947623	0.975116	None	None	0.0233645
ADGRL2	0.864458	0.0282396	0.114791	None	None	1.54914
AL157944.1	-0.0411715	0.935579	0.969135	None	None	0.0289195
LINC01362	-0.704966	0.192408	0.3893	None	None	0.715776
AC116099.1	NA	NA	NA	None	None	NA
LINC01712	NA	NA	NA	None	None	NA
LINC01725	0.495689	0.48287	0.682891	None	None	0.31617
AL035706.1	NA	NA	NA	None	None	NA
TTLL7	-0.233392	0.753235	0.86997	None	None	0.123069
AL359504.2	1.29711	0.539872	0.727304	None	None	0.267709
PRKACB	0.355151	0.592992	0.766175	None	None	0.226951
SAMD13	-2.48083	0.209757	0.40982	None	None	0.678283
DNASE2B	NA	NA	NA	None	None	NA
RPF1	-0.0125134	0.958666	0.981047	None	None	0.0183327
GNG5	0.00819314	0.969797	0.986308	None	None	0.013319
SPATA1	-0.874305	0.00137774	0.0131845	None	None	2.86083
CTBS	-0.319627	0.288991	0.500226	None	None	0.539115
AL359762.1	-3.28281	0.0551331	0.176747	None	None	1.25859
SSX2IP	0.110427	0.873983	0.936648	None	None	0.0584972
LPAR3	-2.08833	0.267877	0.476873	None	None	0.572064
MCOLN2	0.189032	0.910393	0.956751	None	None	0.040771
WDR63	-1.23399	0.118163	0.287741	None	None	0.927518
MCOLN3	-2.89764	0.301809	NA	None	calcium ion homeostasis	0.520268
SYDE2	0.0221706	0.94955	0.976089	None	None	0.0224824
C1orf52	-0.139785	0.505322	0.701015	None	None	0.296431
BCL10	-0.80605	0.000539506	0.00648588	None	None	3.268
AL078459.1	-0.273435	0.592161	0.76564	None	None	0.22756
DDAH1	0.617964	0.399763	0.609161	None	None	0.398197
AC092807.2	NA	NA	NA	None	None	NA
CCN1	-0.430596	0.417599	0.625966	None	None	0.37924
ZNHIT6	-0.427965	0.410792	0.620121	None	None	0.386378
COL24A1	-3.35503	0.18781	0.384311	None	None	0.726281
LINC02795	0.67676	0.868272	NA	None	None	0.061344
ODF2L	-0.116863	0.794505	0.893702	None	None	0.0999032
CLCA2	-1.24679	0.759946	NA	None	None	0.119217
CLCA1	NA	NA	NA	None	None	NA
CLCA4	NA	NA	NA	None	None	NA
CLCA4-AS1	0.0624754	0.952466	0.977761	None	None	0.0211503
AL049597.2	NA	NA	NA	None	None	NA
SH3GLB1	-0.129052	0.689952	0.831895	None	None	0.161181
AL355981.1	0.67676	0.868272	NA	None	None	0.061344
SELENOF	0.563027	0.00125299	0.0124747	None	None	2.90205
HS2ST1	0.340947	0.291261	0.50291	None	None	0.535717
AL121989.1	-0.472626	0.321733	0.533036	None	None	0.492504
LINC01140	1.24964	0.208851	0.408714	None	None	0.680164
LINC02801	-1.64531	0.179192	0.372667	None	None	0.746681
LMO4	-0.969959	0.00177968	0.0160263	None	None	2.74966
LINC01364	-1.95915	0.0283527	0.115104	None	None	1.54741
PKN2-AS1	-1.00666	0.0160701	0.0780162	None	None	1.79398
PKN2	-0.953303	0.00538102	0.0359888	None	None	2.26914
GTF2B	-0.203322	0.314932	0.526027	None	None	0.501783
KYAT3	0.0469476	0.824298	0.91014	None	None	0.0839157
RBMXL1	0.187483	0.422076	0.630132	None	None	0.37461
GBP3	-0.510736	0.365973	0.576675	None	None	0.436551
GBP1	0.186842	0.817666	0.906189	None	None	0.0874239
GBP2	-0.545021	0.186089	0.381643	None	None	0.730279
AC104459.1	-5.87484	0.0558254	0.177841	None	None	1.25317
GBP7	-2.06812	0.59685	NA	None	None	0.224135
GBP4	-3.61305	0.358104	0.568609	None	None	0.445991
GBP5	NA	NA	NA	None	None	NA
GBP6	NA	NA	NA	None	None	NA
AL596214.1	-0.41499	0.813598	0.904077	None	None	0.0895899
LRRC8B	-0.0176911	0.973413	0.987451	None	None	0.0117028
LRRC8C-DT	-0.994201	0.0638959	0.194807	None	None	1.19453
LRRC8C	-0.948076	0.0571588	0.180568	None	None	1.24292
AC099568.2	0.62221	0.562525	0.743738	None	None	0.249858
LRRC8D	-0.979965	0.000345877	0.00457981	None	None	3.46108
AL391497.1	NA	NA	NA	None	None	NA
ZNF326	-0.304176	0.208613	0.408497	None	None	0.680659
AL161797.1	NA	NA	NA	None	None	NA
AC098656.1	2.48501	0.528682	NA	None	None	0.276805
AL627316.1	-1.24679	0.759946	NA	None	None	0.119217
LINC02609	-0.568537	0.28899	0.500226	None	None	0.539117
LINC02788	-4.48845	0.0326588	0.125991	None	None	1.486
LINC01763	NA	NA	NA	None	None	NA
ZNF644	0.630622	0.0327083	0.126056	None	None	1.48534
HFM1	0.23838	0.725244	0.853685	None	None	0.139516
CDC7	0.336442	0.204605	0.404063	None	None	0.689084
BRDT	0.196934	0.714146	0.846789	None	None	0.146213
EPHX4	0.818402	0.211052	0.411723	None	None	0.67561
BTBD8	-0.510356	0.188373	0.384971	None	None	0.724982
AC104836.1	NA	NA	NA	None	None	NA
C1orf146	-5.0173	0.139719	0.318952	None	None	0.854746
GLMN	0.780276	0.00746934	0.0455525	None	None	2.12672
RPAP2	0.472925	0.0801565	0.225873	None	None	1.09606
GFI1	-1.69336	0.402496	0.612209	None	None	0.395239
EVI5	0.923853	1.46159e-06	5.77284e-05	None	None	5.83517
RPL5	0.174878	0.578541	0.756291	None	None	0.237666
DIPK1A	0.80416	8.28222e-05	0.00148193	None	None	4.08185
AC093577.1	NA	NA	NA	None	None	NA
MTF2	0.185892	0.293753	0.505635	None	None	0.532017
TMED5	0.372673	0.302174	0.51441	None	None	0.519742
CCDC18	-1.29689	0.000476883	0.00588758	None	None	3.32159
CCDC18-AS1	-1.25998	0.00521286	0.0352069	None	None	2.28292
DR1	0.453277	0.038897	0.140768	None	None	1.41008
FNBP1L	-0.442103	0.175369	0.367853	None	None	0.756048
BCAR3	0.126157	0.732525	0.857658	None	None	0.135178
AL109613.1	-0.243468	0.66566	0.815127	None	None	0.176747
AL049796.1	-3.1854	0.17889	0.372397	None	None	0.747415
DNTTIP2	0.208587	0.451175	0.655911	None	None	0.345655
GCLM	0.630507	0.16518	0.35444	None	None	0.782043
ABCA4	-1.82529	0.0064622	0.0409691	None	sensory perception of light stimulus	2.18962
ARHGAP29	-0.809204	0.0765832	0.219764	None	None	1.11587
ARHGAP29-AS1	-3.03484	0.295409	0.506934	None	None	0.529576
AC118469.2	NA	NA	NA	None	None	NA
ABCD3	0.879792	0.000102398	0.00174149	None	None	3.98971
F3	-0.56959	0.558771	0.741479	None	None	0.252767
SLC44A3	-1.58309	7.05728e-06	0.000207564	None	None	5.15136
CNN3	-0.639263	0.0367755	0.135956	None	None	1.43444
AC105942.1	-2.12017	0.0669859	0.201228	None	None	1.17402
ALG14	0.641471	0.062013	0.191004	None	None	1.20752
AC095033.1	NA	NA	NA	None	None	NA
TLCD4	0.865506	0.155259	0.340681	None	None	0.808943
AC092802.1	-0.754261	0.408119	0.617978	None	None	0.389213
RWDD3	-0.659445	0.231628	0.435775	None	None	0.635209
AC092802.2	-5.60962	4.18236e-07	2.07777e-05	None	None	6.37858
LINC02607	NA	NA	NA	None	None	NA
LINC01787	-1.24679	0.759946	NA	None	None	0.119217
PTBP2	-0.0100957	0.972613	0.987241	None	None	0.01206
DPYD	-0.307389	0.789045	0.890961	None	None	0.102898
DPYD-AS1	0.67676	0.868272	NA	None	None	0.061344
SNX7	0.426475	0.198019	0.396266	None	None	0.703292
PLPPR5	NA	NA	NA	None	None	NA
AL445433.2	-1.24679	0.759946	NA	None	None	0.119217
LINC01708	1.99804	0.239371	0.444429	None	None	0.620928
PALMD	0.536365	0.70563	0.841516	None	None	0.151423
FRRS1	0.0656158	0.895129	0.948572	None	None	0.0481144
AGL	-0.228934	0.355489	0.566297	None	None	0.449174
AC118553.1	-6.22295	0.00643654	0.0408603	None	None	2.19135
SLC35A3	-0.235928	0.415877	0.624581	None	None	0.381035
MFSD14A	0.536592	0.00265269	0.0215657	None	None	2.57631
AC093019.2	-0.133932	0.704555	0.840806	None	None	0.152085
SASS6	-0.333107	0.102563	0.263673	None	None	0.989009
TRMT13	0.0339155	0.923611	0.963139	None	None	0.034511
LRRC39	-0.501073	0.212867	0.413974	None	None	0.671892
DBT	-0.17173	0.5855	0.761261	None	None	0.232473
AL445928.2	-0.716271	0.0775201	0.22133	None	None	1.11059
RTCA-AS1	-1.24315	0.0093723	0.053431	None	None	2.02815
RTCA	-0.982595	0.0481321	0.161716	None	None	1.31756
CDC14A	1.12137	0.000643554	0.00748232	None	None	3.19142
AL589990.1	-0.0677301	0.894726	0.948352	None	None	0.04831
EXTL2	0.349468	0.269757	0.478688	None	None	0.569027
AC104506.1	-0.337199	0.378231	0.5889	None	None	0.422243
SLC30A7	0.650576	0.00137087	0.0131646	None	None	2.863
DPH5	-0.40424	0.247691	0.453056	None	None	0.60609
AC093157.2	NA	NA	NA	None	None	NA
AC093157.1	0.288562	0.282833	0.49296	None	None	0.548469
LINC01307	NA	NA	NA	None	None	NA
LINC01709	0.67676	0.868272	NA	None	None	0.061344
OLFM3	-3.92359	0.161824	0.349936	None	None	0.790958
AC114485.1	-1.5483	NA	NA	None	None	NA
AC099567.1	-5.46672	1.91277e-09	2.25719e-07	None	None	8.71834
COL11A1	-3.37136	0.000351854	0.00463556	None	sensory perception of light stimulus	3.45364
AC095032.2	-2.00337	0.620987	NA	None	None	0.206917
AC095032.1	-0.680224	0.189319	0.385921	None	None	0.722806
RNPC3	-0.1496	0.460881	0.664198	None	None	0.336411
AMY2B	-0.978757	0.094696	0.251585	None	None	1.02367
AL591888.1	NA	NA	NA	None	None	NA
LINC01677	NA	NA	NA	None	None	NA
AL355306.2	-1.24679	0.759946	NA	None	None	0.119217
PRMT6	0.369437	0.512116	0.706184	None	None	0.290631
NTNG1	0.534178	0.504596	0.700577	None	None	0.297056
VAV3	1.24961	2.1795e-05	0.000511252	None	None	4.66164
VAV3-AS1	NA	NA	NA	None	None	NA
SLC25A24	0.431512	0.13638	0.31405	None	None	0.865251
AL359258.2	-1.24679	0.759946	NA	None	None	0.119217
NBPF4	NA	NA	NA	None	None	NA
AL359258.1	NA	NA	NA	None	None	NA
AL390038.1	NA	NA	NA	None	None	NA
NBPF6	-5.10825	0.112955	0.279634	None	None	0.947093
FAM102B	1.5596	0.000232803	0.00332687	None	None	3.63301
HENMT1	-0.33989	0.553893	0.738091	None	None	0.256574
AL160171.1	-5.55978	0.00673425	0.0421542	None	None	2.17171
PRPF38B	0.615716	0.00118024	0.0118858	None	None	2.92803
FNDC7	3.65394	0.00403526	0.0292237	None	None	2.39413
STXBP3	0.705619	0.000962047	0.0101716	None	None	3.0168
AKNAD1	0.953736	0.000477763	0.00589465	None	None	3.32079
SPATA42	NA	NA	NA	None	None	NA
GPSM2	1.23366	1.91735e-08	1.60519e-06	None	None	7.7173
CLCC1	-0.0969188	0.820078	0.907689	None	None	0.0861448
WDR47	0.619373	0.0740358	0.215476	None	None	1.13056
TAF13	0.718431	0.0447373	0.153778	None	None	1.34933
AL356488.3	-0.51036	0.155053	0.34041	None	None	0.809521
TMEM167B	-0.372432	0.0969183	0.254884	None	None	1.01359
AL356488.2	-6.10643	0.00613938	0.0394689	None	None	2.21188
C1orf194	-2.84023	0.0106631	0.0585679	None	None	1.97212
KIAA1324	1.21538	0.0121209	0.064284	None	None	1.91647
SARS	-0.411495	0.108961	0.273894	None	None	0.96273
CELSR2	-0.738546	0.457519	0.661799	None	None	0.339591
PSRC1	-4.42995	0.000767273	0.00860052	None	None	3.11505
MYBPHL	-5.82245	0.0453397	0.155097	None	None	1.34352
SORT1	-0.590497	0.0983766	0.257487	None	None	1.00711
PSMA5	0.538754	0.00949123	0.0539013	None	None	2.02268
SYPL2	1.3835	0.728568	NA	None	None	0.13753
ATXN7L2	-1.2892	0.400036	0.60948	None	None	0.397901
CYB561D1	-0.754753	0.00769429	0.0464823	None	None	2.11383
AMIGO1	NA	NA	NA	None	None	NA
GPR61	-4.95974	0.171866	0.363219	None	None	0.76481
AL355310.3	NA	NA	NA	None	None	NA
GNAI3	0.0242969	0.902594	0.95229	None	None	0.0445075
AL355310.1	NA	NA	NA	None	None	NA
GNAT2	-1.24679	0.759946	NA	None	sensory perception of light stimulus	0.119217
AMPD2	0.689674	0.18131	0.375524	None	None	0.741579
AL355310.2	NA	NA	NA	None	None	NA
GSTM4	-5.61327	0.0227454	0.0988493	None	None	1.64311
GSTM2	-0.446365	0.776789	0.883749	None	None	0.109697
GSTM1	NA	NA	NA	None	None	NA
AC000032.1	NA	NA	NA	None	None	NA
GSTM5	-2.38063	0.553608	NA	None	None	0.256797
AL158847.1	NA	NA	NA	None	None	NA
GSTM3	0.256853	0.761563	0.874965	None	None	0.118294
EPS8L3	NA	NA	NA	None	None	NA
LINC01768	-1.24679	0.759946	NA	None	None	0.119217
CSF1	NA	NA	NA	None	None	NA
AHCYL1	0.0903203	0.627013	0.789032	None	None	0.202724
STRIP1	0.322388	0.170502	0.361718	None	None	0.76827
AL160006.1	0.0411488	0.926113	0.964106	None	None	0.0333362
ALX3	-6.68947	0.00999838	0.055867	None	None	2.00007
LINC01397	NA	NA	NA	None	None	NA
SLC6A17	NA	NA	NA	None	None	NA
KCNC4	-0.673094	0.696995	0.836491	None	None	0.15677
RBM15-AS1	-5.18318	0.00965051	0.0544203	None	None	2.01545
RBM15	-0.424266	0.105947	0.269418	None	None	0.974912
LAMTOR5-AS1	0.164993	0.576824	0.755085	None	None	0.238956
SLC16A4	-0.293878	0.316267	0.527294	None	None	0.499947
AL355488.1	-0.179019	0.729838	0.856576	None	None	0.136774
LAMTOR5	-0.202553	0.408776	0.618192	None	None	0.388514
KCNA2	-2.38063	0.553608	NA	None	None	0.256797
CD53	3.73132	0.0187346	0.0863346	None	None	1.72735
AL360270.2	0.247274	0.88248	0.941668	None	None	0.0542951
AL360270.1	-0.249615	0.368036	0.578673	None	None	0.434109
LRIF1	-0.0204946	0.905666	0.954233	None	None	0.043032
AL360270.3	NA	NA	NA	None	None	NA
DRAM2	-0.0459442	0.865613	0.93147	None	None	0.0626762
CEPT1	-0.239027	0.431909	0.63847	None	None	0.364607
AL355816.1	-1.24679	0.759946	NA	None	None	0.119217
AL355816.2	0.741848	0.294161	0.506009	None	None	0.531415
DENND2D	0.981743	0.00106013	0.0109574	None	None	2.97464
CHI3L2	0.544466	0.526213	0.717699	None	None	0.278838
CHIA	NA	NA	NA	None	None	NA
PIFO	-6.36478	0.000109538	0.00183694	None	None	3.96043
OVGP1	0.602753	0.0547028	0.175925	None	None	1.26199
AL390195.2	2.28223	0.0157622	0.0773366	None	None	1.80238
AL390195.1	2.47611	0.00301736	0.0237429	None	None	2.52037
WDR77	1.37781	2.25182e-05	0.000525016	None	None	4.64747
ATP5PB	0.561321	0.0403096	0.143904	None	None	1.39459
C1orf162	-1.94515	0.124855	0.297927	None	None	0.903593
TMIGD3	-3.43389	0.106692	0.270395	None	None	0.971867
RAP1A	0.730051	0.00436411	0.0309869	None	None	2.3601
INKA2	-0.214411	0.487903	0.687281	None	None	0.311666
INKA2-AS1	0.67676	0.868272	NA	None	None	0.061344
AL049557.1	-0.285021	0.944313	NA	None	None	0.024884
DDX20	0.314952	0.362178	0.572714	None	None	0.441078
KCND3	-5.92704	0.010984	0.060022	None	None	1.95924
AL445426.1	NA	NA	NA	None	None	NA
CTTNBP2NL	0.739764	0.00250413	0.0207348	None	None	2.60134
WNT2B	1.12067	0.000183228	0.00277512	None	None	3.73701
AL354760.1	NA	NA	NA	None	None	NA
ST7L	0.284567	0.432578	0.639164	None	None	0.363935
CAPZA1	-0.278512	0.0992758	0.258757	None	None	1.00316
MOV10	-0.260219	0.319681	0.531145	None	None	0.495283
AL603832.1	-4.29989	0.0439533	0.152041	None	None	1.35701
RHOC	-0.132095	0.70261	0.839788	None	None	0.153286
PPM1J	-2.22278	0.581402	NA	None	None	0.235523
TAFA3	NA	NA	NA	None	None	NA
LINC01356	3.25178	0.00574838	0.0377062	None	None	2.24045
LINC01357	1.09219	0.00373838	0.0278065	None	None	2.42732
SLC16A1	0.02798	0.903118	0.952488	None	None	0.0442556
SLC16A1-AS1	-0.575424	0.053482	0.173362	None	None	1.27179
AL390242.1	-0.644798	0.31192	0.523433	None	None	0.505956
LRIG2-DT	-0.498873	0.218802	0.420151	None	None	0.659949
LRIG2	-0.175995	0.392273	0.602116	None	None	0.406411
MAGI3	-0.528044	0.121944	0.293456	None	None	0.913839
PHTF1	-0.0180602	0.948916	0.975902	None	None	0.0227724
RSBN1	-0.579441	0.00154189	0.0144112	None	None	2.81195
AL137856.1	-4.13034	0.0977895	0.256334	None	None	1.00971
PTPN22	-0.219785	0.928951	0.965627	None	None	0.0320072
AP4B1-AS1	-3.1547	0.00532449	0.0357226	None	None	2.27372
BCL2L15	0.67676	0.868272	NA	None	None	0.061344
AP4B1	-0.877191	0.399229	0.608878	None	None	0.398778
DCLRE1B	-3.05608	0.0551048	0.176686	None	None	1.25881
HIPK1-AS1	-4.34701	0.0125207	0.0658383	None	None	1.90237
HIPK1	0.175649	0.413794	0.622795	None	None	0.383216
OLFML3	-1.24679	0.759946	NA	None	None	0.119217
TRIM33	1.02405	0.00107189	0.0110433	None	None	2.96985
BCAS2	-0.264539	0.360092	0.570584	None	None	0.443587
DENND2C	0.401828	0.225706	0.428236	None	None	0.646456
AMPD1	2.66311	0.502458	NA	None	None	0.2989
NRAS	-0.280113	0.251689	0.457584	None	None	0.599136
CSDE1	0.572253	0.00381115	0.0281415	None	None	2.41894
SIKE1	-0.302709	0.212217	0.413158	None	None	0.67322
SYCP1	-1.24679	0.759946	NA	None	None	0.119217
TSPAN2	-3.96249	0.00509834	0.0346598	None	None	2.29257
LINC01765	NA	NA	NA	None	None	NA
AL049825.1	NA	NA	NA	None	None	NA
NGF-AS1	-4.00209	0.000141481	0.00226268	None	None	3.8493
NGF	-0.962246	0.105564	0.268624	None	None	0.976482
AL512638.3	NA	NA	NA	None	None	NA
VANGL1	-0.396779	0.587696	0.762775	None	None	0.230848
CASQ2	0.67676	0.868272	NA	None	None	0.061344
SLC22A15	-0.0431838	0.942241	0.97237	None	None	0.0258379
AL365318.1	2.18726	0.584105	NA	None	None	0.233509
MAB21L3	-1.71176	0.00133122	0.0129127	None	None	2.87575
ATP1A1	1.35993	2.05187e-05	0.000485173	None	None	4.68785
ATP1A1-AS1	0.510488	0.0829187	0.230541	None	None	1.08135
LINC01762	2.76023	7.74884e-09	7.23539e-07	None	None	8.11076
AL390066.1	NA	NA	NA	None	None	NA
CD58	0.252558	0.511389	0.705606	None	None	0.291248
IGSF3	-0.961667	0.000821859	0.00901795	None	None	3.0852
C1orf137	NA	NA	NA	None	None	NA
PTGFRN	2.16759	0.000281259	0.00388212	None	None	3.55089
CD101	5.64364	0.00253714	0.0209398	None	None	2.59566
AL445231.1	-0.304683	0.866295	0.931567	None	None	0.0623343
TTF2	0.527325	0.0951315	0.25215	None	None	1.02168
TRIM45	0.354304	0.575914	0.754252	None	None	0.239642
VTCN1	-3.41772	0.0299816	0.119246	None	None	1.52315
LINC01525	-0.0196107	0.995297	NA	None	None	0.00204722
AL358072.1	-2.32421	0.137437	0.31573	None	None	0.861896
MAN1A2	3.39415	1.3402e-20	2.5935e-17	None	None	19.8728
AL157902.1	3.65426	0.3536	NA	None	None	0.451488
TENT5C	-1.10912	0.000867766	0.00940002	None	None	3.0616
GDAP2	0.9435	1.04473e-06	4.34027e-05	None	None	5.98099
WDR3	0.927471	0.000232067	0.00332091	None	None	3.63439
SPAG17	-0.15971	0.728311	0.855652	None	None	0.137683
AL391557.1	NA	NA	NA	None	None	NA
TBX15	1.69898	0.16326	0.35229	None	None	0.78712
WARS2	0.897711	0.00093727	0.00994395	None	None	3.02814
WARS2-IT1	0.610688	0.193515	0.390543	None	None	0.713284
WARS2-AS1	0.247328	0.417012	0.625549	None	None	0.379851
AL359915.1	-0.24334	0.621652	0.785422	None	None	0.206453
LINC01780	NA	NA	NA	None	None	NA
HSD3B1	0.715649	0.0850511	0.234282	None	None	1.07032
LINC00622	-2.87849	0.101867	0.26266	None	None	0.991968
ZNF697	1.00334	0.00516669	0.0349933	None	None	2.28679
PHGDH	-0.202177	0.647836	0.804203	None	None	0.188535
NOTCH2	0.480585	0.0664787	0.200269	None	None	1.17732
SEC22B	0.0900636	0.588316	0.763116	None	None	0.23039
NBPF26	0.0731286	0.840976	0.919007	None	None	0.0752161
AC253572.2	-7.17874	2.01663e-07	1.12109e-05	None	None	6.69537
LINC00623	-0.363961	0.359822	0.570254	None	None	0.443912
FCGR1B	0.67676	0.868272	NA	None	None	0.061344
AC244453.3	-1.92875	0.269314	0.478237	None	None	0.569741
AC244453.2	NA	NA	NA	None	None	NA
AC244453.1	NA	NA	NA	None	None	NA
FAM72B	-5.35792	0.0950857	0.25211	None	None	1.02188
SRGAP2C	-0.0212497	0.948262	0.9756	None	None	0.0230715
SRGAP2-AS1	-0.987364	0.0158909	0.0776323	None	None	1.79885
LINC02798	0.160452	0.793121	0.893147	None	None	0.100661
AL592494.2	NA	NA	NA	None	None	NA
AC239800.2	NA	NA	NA	None	None	NA
LINC02591	-1.6464	0.24697	0.452081	None	None	0.607356
HIST2H3PS2	-0.581271	0.665401	0.815121	None	None	0.176916
AC246680.1	NA	NA	NA	None	None	NA
FAM72C	NA	NA	NA	None	None	NA
LINC02802	-0.303392	0.509209	0.70416	None	None	0.293104
AC246785.3	NA	NA	NA	None	None	NA
NBPF15	-0.95406	0.225816	0.428317	None	None	0.646246
FP700111.1	-1.86628	0.112286	0.278795	None	None	0.949673
SRGAP2B	-0.540731	0.0884721	0.240067	None	None	1.05319
FAM72D	-4.44721	0.246985	NA	None	None	0.607329
AC245014.3	-5.635	0.00132887	0.0129095	None	None	2.87652
NBPF20	-5.33285	0.0956772	0.253004	None	None	1.01919
AC239860.4	-4.2224	0.061985	0.190948	None	None	1.20771
GPR89A	0.0311478	0.912557	0.958075	None	None	0.0397401
PDZK1	-0.918392	0.0113448	0.0613142	None	None	1.9452
CD160	-4.60847	0.00159591	0.014737	None	None	2.79699
RNF115	-0.424529	0.246034	0.451037	None	None	0.609005
POLR3C	-0.167242	0.599351	0.770788	None	None	0.222319
NUDT17	-4.31369	7.67762e-06	0.000221076	None	None	5.11477
PIAS3	-0.488256	0.102055	0.262859	None	None	0.991165
ANKRD35	NA	NA	NA	None	None	NA
ITGA10	-1.99135	0.331731	0.542103	None	None	0.479214
PEX11B	-0.726123	0.169313	0.360042	None	None	0.77131
RBM8A	-0.18246	0.397509	0.607231	None	None	0.400654
LIX1L-AS1	-0.605792	0.05558	0.177664	None	None	1.25508
LIX1L	-2.5454	0.198242	0.396505	None	None	0.702804
ANKRD34A	-5.98827	0.0099314	0.0555818	None	None	2.00299
POLR3GL	-1.35312	0.189312	0.385921	None	None	0.722821
TXNIP	NA	NA	NA	None	None	NA
HJV	2.13389	0.547615	NA	None	None	0.261524
AC239799.2	-1.19048	0.0277128	0.113247	None	None	1.55732
LINC01719	-0.394521	0.36828	0.578876	None	None	0.433822
NBPF10	1.52347	0.00636286	0.0405801	None	None	2.19635
NOTCH2NLA	0.927845	0.0775127	0.22133	None	None	1.11063
AC239799.1	NA	NA	NA	None	None	NA
AC245407.2	-0.576898	0.278178	0.487895	None	None	0.555678
NBPF12	-0.272628	0.452874	0.657387	None	None	0.344022
PRKAB2	-1.30446	0.00020611	0.00304729	None	None	3.6859
AC242426.2	-0.870415	0.0333289	0.127477	None	None	1.47718
FMO5	-1.24271	0.00572979	0.0376094	None	None	2.24186
CHD1L	-3.29552	0.296414	NA	None	None	0.528101
LINC00624	-0.276227	0.505868	0.701287	None	None	0.295963
BCL9	-0.152229	0.650883	0.806424	None	None	0.186497
ACP6	0.256474	0.56684	0.747099	None	None	0.24654
GPR89B	0.140271	0.566086	0.746668	None	None	0.247118
AC239803.1	NA	NA	NA	None	None	NA
LINC02804	-2.65927	0.109274	0.274427	None	None	0.961481
NBPF11	-0.10185	0.726487	0.854312	None	None	0.138772
LINC02805	-2.94495	0.194436	0.391867	None	None	0.711223
AC239809.3	1.05851	0.413103	0.622094	None	None	0.383942
LINC01731	4.58721	0.00783853	0.0471316	None	None	2.10577
LINC01138	0.251039	0.38944	0.59975	None	None	0.409559
LINC02806	4.45096	0.035615	0.133098	None	None	1.44837
AC245100.1	2.445	0.00854933	0.0500293	None	None	2.06807
PPIAL4G	NA	NA	NA	None	None	NA
NBPF14	1.27543	0.00297263	0.0235012	None	None	2.52686
NUDT4B	NA	NA	NA	None	None	NA
PDE4DIP	1.27417	8.30675e-08	5.41628e-06	None	None	7.08057
AC239802.2	-3.76557	0.330379	0.541105	None	None	0.480988
AC239804.1	NA	NA	NA	None	None	NA
NBPF9	0.351539	0.3269	0.538051	None	None	0.485585
AC245297.3	0.41695	0.115639	0.284112	None	None	0.936896
AC245297.2	NA	NA	NA	None	None	NA
NOTCH2NLC	0.672921	0.0373054	0.137098	None	None	1.42823
NBPF19	0.106263	0.829778	0.913526	None	None	0.081038
AC242842.1	NA	NA	NA	None	None	NA
FCGR1A	NA	NA	NA	None	None	NA
HIST2H2BF	0.0732455	0.846416	0.921955	None	None	0.0724164
AC243772.2	0.224109	0.838692	0.91806	None	None	0.0763973
HIST2H3D	NA	NA	NA	None	None	NA
HIST2H4A	-0.526029	0.895321	NA	None	None	0.0480212
HIST2H2AA4	-0.255991	0.531797	0.722416	None	None	0.274254
HIST2H4B	-6.87864	0.00652845	0.0412939	None	None	2.18519
AC239868.1	-3.90342	0.303113	0.514923	None	None	0.518396
HIST2H2BE	0.592455	0.0867751	0.237293	None	None	1.0616
HIST2H2AC	-0.572144	0.0566224	0.179429	None	None	1.24701
HIST2H2AB	-6.21097	0.00598045	0.0387711	None	None	2.22327
BOLA1	0.789384	0.0165408	0.0794613	None	None	1.78144
SV2A	-2.48245	0.178321	0.371714	None	calcium ion homeostasis	0.748797
SF3B4	0.369843	0.268641	0.477614	None	None	0.570828
MTMR11	-0.973255	0.0130498	0.0675858	None	None	1.88439
OTUD7B	-0.267402	0.160332	0.347745	None	None	0.794981
AC244033.2	0.143558	0.777186	0.883891	None	None	0.109475
VPS45	0.217264	0.535784	0.724272	None	None	0.271011
PLEKHO1	-1.81005	0.42237	0.630376	None	None	0.374307
AC242988.2	NA	NA	NA	None	None	NA
ANP32E	-0.767936	0.000412251	0.005256	None	None	3.38484
AC242988.1	NA	NA	NA	None	None	NA
CA14	-5.21494	0.183707	0.378412	None	None	0.735873
APH1A	0.0178977	0.947108	0.97509	None	None	0.0236005
C1orf54	0.048866	0.929844	0.966083	None	None	0.03159
CIART	NA	NA	NA	None	None	NA
MRPS21	0.147929	0.393711	0.60335	None	None	0.404822
PRPF3	0.27277	0.205978	0.405734	None	None	0.686178
RPRD2	0.48309	0.0361578	0.134343	None	None	1.4418
TARS2	0.287208	0.488608	0.687776	None	None	0.31104
ECM1	0.576563	0.13414	0.311281	None	None	0.872441
FALEC	-0.0546341	0.914793	0.959325	None	None	0.0386769
AL356356.1	0.0527343	0.876115	0.937928	None	None	0.057439
ADAMTSL4	-0.32433	0.203906	0.403381	None	None	0.69057
ADAMTSL4-AS1	1.11131	0.0146357	0.0732546	None	None	1.83459
MCL1	-0.278791	0.356664	0.56723	None	None	0.447741
ENSA	-0.344111	0.0391933	0.141521	None	None	1.40679
GOLPH3L	-0.61644	0.0147066	0.0734533	None	None	1.83249
HORMAD1	0.513555	0.844112	NA	None	None	0.0736001
CTSS	0.10866	0.9507	0.97675	None	None	0.0219565
CTSK	0.924955	0.0301556	0.119675	None	None	1.52063
ARNT	0.943635	0.00179609	0.0161287	None	None	2.74567
CTXND2	2.97698	0.117195	0.286423	None	None	0.931092
SETDB1	0.0128727	0.957161	0.980194	None	None	0.0190151
CERS2	0.193513	0.546517	0.732703	None	None	0.262396
AL590133.2	NA	NA	NA	None	None	NA
AL590133.1	NA	NA	NA	None	None	NA
ANXA9	-0.946652	0.348351	0.559169	None	None	0.457983
MINDY1	-0.050968	0.90105	0.951769	None	None	0.0452509
PRUNE1	0.301204	0.273084	0.482475	None	None	0.563705
BNIPL	-1.36805	0.00990001	0.0554533	None	None	2.00436
C1orf56	-0.471845	0.168331	0.358645	None	None	0.773836
CDC42SE1	0.467355	0.0238411	0.101992	None	None	1.62267
MLLT11	0.0915156	0.805107	0.899747	None	None	0.0941465
GABPB2	-0.0438564	0.917733	0.960834	None	None	0.0372837
AL592424.1	NA	NA	NA	None	None	NA
SEMA6C	-3.70242	2.70787e-05	0.00060777	None	axon guidance	4.56737
TNFAIP8L2	NA	NA	NA	None	None	NA
SCNM1	-0.0539311	0.855592	0.926397	None	None	0.0677333
LYSMD1	-0.694498	0.0728775	0.213136	None	None	1.13741
VPS72	0.178733	0.46174	0.664888	None	None	0.335602
PIP5K1A	0.534406	0.1117	0.277763	None	None	0.951949
PSMD4	0.0363033	0.864625	0.93093	None	None	0.0631721
ZNF687-AS1	-0.10788	0.826069	0.911249	None	None	0.0829834
ZNF687	-0.227093	0.480826	0.681504	None	None	0.318012
PI4KB	0.753984	1.66776e-05	0.000412863	None	None	4.77787
AL391069.3	NA	NA	NA	None	None	NA
RFX5	1.41264	0.295881	0.50747	None	None	0.528883
AL391069.2	NA	NA	NA	None	None	NA
SELENBP1	-3.98617	0.312165	NA	None	None	0.505616
PSMB4	-0.0457149	0.857593	0.92746	None	None	0.0667185
POGZ	-0.390699	0.226508	0.429214	None	None	0.644917
CGN	-2.54223	8.46088e-06	0.00024024	None	None	5.07258
TUFT1	-0.145901	0.621723	0.785422	None	None	0.206403
AL365436.2	-0.921449	0.00383701	0.0282561	None	None	2.41601
SNX27	0.44395	0.0316676	0.12368	None	None	1.49939
AL391335.1	-0.707303	0.13896	0.317786	None	None	0.857109
CELF3	NA	NA	NA	None	None	NA
AL589765.1	-2.5983	0.516322	NA	None	None	0.287079
RIIAD1	-1.24679	0.759946	NA	None	None	0.119217
AL589765.7	-1.58777	0.135081	0.312369	None	None	0.869406
MRPL9	-0.27473	0.380623	0.591475	None	None	0.419505
OAZ3	-4.53181	0.0235884	0.101357	None	None	1.6273
AL589765.4	NA	NA	NA	None	None	NA
AL589765.5	NA	NA	NA	None	None	NA
TDRKH	0.0559111	0.821147	0.908064	None	None	0.0855793
TDRKH-AS1	0.837287	0.0370401	0.136514	None	None	1.43133
AL589765.6	NA	NA	NA	None	None	NA
RORC	0.062788	0.966285	0.98435	None	None	0.0148948
C2CD4D	0.540242	0.792853	0.893097	None	None	0.100807
C2CD4D-AS1	1.77192	0.00402976	0.0292125	None	None	2.39472
THEM5	2.67103	0.00852542	0.0499198	None	None	2.06928
THEM4	-0.270434	0.432263	0.638845	None	None	0.364252
AL450992.2	-0.545243	0.12777	0.302035	None	None	0.89357
AL450992.3	-4.21013	0.285105	NA	None	None	0.544995
S100A10	-1.08364	0.0325163	0.125686	None	None	1.4879
AL450992.1	-0.348908	0.496367	0.693918	None	None	0.304197
S100A11	-0.217783	0.235727	0.440301	None	None	0.62759
TCHHL1	0.67676	0.868272	NA	None	None	0.061344
TCHH	-0.0741854	0.9447	0.973876	None	None	0.0247061
FLG-AS1	0.304639	NA	NA	None	None	NA
FLG2	NA	NA	NA	None	None	NA
SPRR3	-6.16543	0.00643631	0.0408603	None	None	2.19136
SPRR2D	-3.49778	0.0265002	0.109714	None	None	1.57675
PRR9	4.65518	6.35566e-09	6.20564e-07	None	None	8.19684
PGLYRP4	-1.66968	0.676464	NA	None	None	0.169755
S100A9	-1.41535	2.23894e-10	3.39102e-08	None	None	9.64996
S100A7	-1.81547	0.38785	0.598211	None	None	0.411336
S100A6	-0.483551	0.201096	0.400299	None	None	0.696596
S100A5	NA	NA	NA	None	None	NA
S100A4	0.0402521	0.955317	0.979349	None	None	0.0198526
S100A2	NA	NA	NA	None	None	NA
BX470102.2	-5.97668	0.00891684	0.0515525	None	None	2.04979
S100A16	-1.6944	0.142396	0.322727	None	None	0.846502
S100A14	-2.43412	0.0444798	0.153163	None	calcium ion homeostasis	1.35184
S100A13	-0.698925	0.136023	0.313643	None	None	0.866386
S100A1	NA	NA	NA	None	None	NA
AL162258.2	-0.282303	0.56255	0.743738	None	None	0.249839
CHTOP	0.185755	0.347276	0.558063	None	None	0.459325
SNAPIN	-0.444704	0.141767	0.321682	None	None	0.848424
ILF2	0.157365	0.592168	0.76564	None	None	0.227555
NPR1	0.957364	0.123527	0.295549	None	None	0.908239
INTS3	-0.913737	0.0196039	0.0892319	None	None	1.70766
AL513523.4	-4.46924	0.0635464	0.194171	None	None	1.19691
AL513523.3	NA	NA	NA	None	None	NA
SLC27A3	-2.27287	0.0639394	0.194878	None	None	1.19423
GATAD2B	0.454565	0.00812562	0.048372	None	None	2.09014
AL358472.5	-5.57371	0.000161485	0.00251296	None	None	3.79187
DENND4B	-1.01043	0.00189379	0.0167867	None	None	2.72267
CRTC2	0.376367	0.222107	0.424252	None	None	0.653439
SLC39A1	0.3452	0.279946	0.489896	None	None	0.552926
AL358472.4	-0.467747	0.383796	0.594431	None	None	0.415899
AL358472.3	-1.29412	0.706335	NA	None	None	0.150989
CREB3L4	-0.433617	0.402262	0.612045	None	None	0.395491
JTB	0.0767354	0.682764	0.827051	None	None	0.165729
AL358472.2	-3.49036	0.197955	0.39622	None	None	0.703432
RAB13	-0.654408	0.0242512	0.103324	None	None	1.61527
RPS27	-0.185818	0.493567	0.691894	None	None	0.306654
NUP210L	0.137366	0.6867	0.830011	None	None	0.163233
TPM3	0.00613031	0.969784	0.986308	None	None	0.013325
C1orf189	-2.8544	0.0798698	0.225428	None	None	1.09762
C1orf43	0.0864221	0.696327	0.835931	None	None	0.157187
UBAP2L	0.266964	0.149104	0.332138	None	None	0.826511
HAX1	-1.17731	0.00018977	0.00284507	None	None	3.72177
ATP8B2	-0.0949948	0.96441	0.983482	None	None	0.0157381
IL6R-AS1	NA	NA	NA	None	None	NA
IL6R	-0.451954	0.761372	0.87485	None	None	0.118403
SHE	NA	NA	NA	None	None	NA
TDRD10	NA	NA	NA	None	None	NA
UBE2Q1	0.200987	0.63756	0.796898	None	None	0.195479
AL592078.2	NA	NA	NA	None	None	NA
CHRNB2	NA	NA	NA	None	None	NA
ADAR	-0.137163	0.734197	0.858654	None	None	0.134187
AL606500.1	0.5675	0.884534	NA	None	None	0.0532855
KCNN3	-2.44902	0.155072	0.34041	None	None	0.809467
PMVK	-0.359819	0.239847	0.444971	None	None	0.620065
AL451085.1	-6.82144	0.00744212	0.0454875	None	None	2.1283
PBXIP1	-0.251983	0.403959	0.613756	None	None	0.393663
PYGO2	0.0517019	0.859379	0.928257	None	None	0.0658151
AL451085.2	-3.86311	0.0263429	0.109368	None	None	1.57934
SHC1	0.120886	0.695037	0.835194	None	None	0.157992
CKS1B	-0.397094	0.257048	0.464283	None	None	0.589986
FLAD1	0.396031	0.197339	0.395328	None	None	0.704788
ZBTB7B	0.561843	0.025755	0.107648	None	None	1.58914
DCST2	-1.05504	0.0449867	0.154322	None	None	1.34692
DCST1	-1.40865	0.284509	0.495039	None	None	0.545904
DCST1-AS1	NA	NA	NA	None	None	NA
ADAM15	0.295293	0.412817	0.621909	None	None	0.384243
EFNA4	0.532389	0.247128	0.452327	None	None	0.607078
EFNA3	-3.8637	0.0437359	0.151408	None	axon guidance	1.35916
EFNA1	-1.14259	0.0167943	0.0802779	None	synapse organization	1.77484
SLC50A1	-0.840526	0.00010668	0.00179999	None	None	3.97192
DPM3	0.803036	0.000592097	0.0069871	None	None	3.22761
KRTCAP2	0.27692	0.244385	0.449978	None	None	0.611925
TRIM46	0.728466	0.329822	0.540523	None	None	0.481721
MUC1	NA	NA	NA	None	None	NA
AC234582.1	-2.276	0.128763	0.303405	None	None	0.890208
THBS3	-1.37014	0.000218284	0.00317362	None	None	3.66098
MTX1	-0.1636	0.564882	0.745694	None	None	0.248042
AC234582.2	NA	NA	NA	None	None	NA
GBA	-0.294976	0.396786	0.606403	None	None	0.401443
FAM189B	0.756633	0.0229426	0.0994692	None	None	1.63936
SCAMP3	0.558449	0.0406764	0.14473	None	None	1.39066
CLK2	-0.259083	0.210859	0.411471	None	None	0.676008
HCN3	-3.43496	0.0746452	0.21641	None	None	1.127
PKLR	-1.24679	0.759946	NA	None	None	0.119217
FDPS	0.0382454	0.928193	0.965279	None	None	0.0323617
RUSC1-AS1	-0.488628	0.35399	0.564687	None	None	0.451009
RUSC1	0.468136	0.212976	0.413974	None	None	0.67167
ASH1L	0.29556	0.124235	0.296814	None	None	0.905757
ASH1L-IT1	NA	NA	NA	None	None	NA
ASH1L-AS1	0.127657	0.760171	0.874238	None	None	0.119089
AL353807.2	0.67676	0.868272	NA	None	None	0.061344
MSTO1	0.586004	0.137649	0.316066	None	None	0.861226
AL353807.5	0.665837	0.353279	0.564302	None	None	0.451882
YY1AP1	0.605235	0.00376341	0.0279171	None	None	2.42442
DAP3	1.27252	0.00133073	0.0129127	None	None	2.87591
AL162734.1	1.40694	0.184765	0.379642	None	None	0.73338
GON4L	0.419614	0.072869	0.213136	None	None	1.13746
SYT11	-1.24679	0.759946	NA	None	None	0.119217
RIT1	-0.222932	0.4114	0.620663	None	None	0.385735
KHDC4	0.27573	0.222714	0.424474	None	None	0.652253
ARHGEF2	0.483763	0.18701	0.383042	None	None	0.728134
AL355388.2	0.67676	0.868272	NA	None	None	0.061344
AL355388.1	NA	NA	NA	None	None	NA
AL355388.3	-0.349352	0.579834	0.756917	None	None	0.236697
SSR2	0.236145	0.441415	0.647201	None	None	0.355153
UBQLN4	0.886544	0.00619205	0.0397278	None	None	2.20817
LAMTOR2	-0.233194	0.506111	0.70134	None	None	0.295754
RAB25	-0.443842	0.134596	0.311921	None	None	0.870968
MEX3A	-3.45734	0.0182249	0.0849216	None	None	1.73933
LMNA	0.0998435	0.621198	0.785135	None	None	0.20677
SEMA4A	-3.33661	0.0429381	0.149713	None	synapse organization	1.36716
SLC25A44	0.513766	0.0344759	0.130182	None	None	1.46248
PMF1	0.38312	0.127917	0.302272	None	None	0.89307
BGLAP	-4.2917	0.0303421	0.120099	None	None	1.51795
PAQR6	-4.65384	0.000105793	0.00178816	None	None	3.97554
SMG5	0.596366	0.00509942	0.0346598	None	None	2.29248
TMEM79	-0.587949	0.0233848	0.100841	None	None	1.63107
GLMP	0.63467	0.0202633	0.0911728	None	None	1.69329
CCT3	0.857228	2.2029e-05	0.000516112	None	None	4.65701
TSACC	0.138242	0.699051	0.837533	None	None	0.155491
RHBG	1.04044	0.57208	0.75151	None	None	0.242543
C1orf61	0.495847	0.331444	0.542056	None	None	0.47959
MEF2D	0.177847	0.42939	0.636261	None	None	0.367149
AL365181.1	NA	NA	NA	None	None	NA
IQGAP3	-0.39847	0.540689	0.727894	None	None	0.267053
NAXE	0.502998	0.141596	0.321482	None	None	0.84895
GPATCH4	0.712926	0.0219381	0.0963645	None	None	1.6588
HAPLN2	NA	NA	NA	None	None	NA
AL365181.2	-3.81027	0.334586	NA	None	None	0.475492
BCAN	-3.57376	0.366355	NA	None	synapse organization	0.436098
AL365181.3	-2.35709	0.296651	0.508383	None	None	0.527754
AL590666.2	-3.57376	0.366355	NA	None	None	0.436098
NES	-2.00337	0.620987	NA	None	None	0.206917
AL590666.3	NA	NA	NA	None	None	NA
AL590666.4	-3.49004	0.0326827	0.12604	None	None	1.48568
CRABP2	-2.69083	0.184629	0.379527	None	None	0.7337
AL590666.1	NA	NA	NA	None	None	NA
ISG20L2	0.679575	0.009714	0.0546501	None	None	2.0126
RRNAD1	-0.0313935	0.873413	0.936274	None	None	0.0587801
MRPL24	0.686212	0.029196	0.117094	None	None	1.53468
HDGF	0.567234	0.0127231	0.0664735	None	None	1.89541
PRCC	0.728694	6.25e-05	0.00116717	None	None	4.20412
AL590666.5	0.67676	0.868272	NA	None	None	0.061344
SH2D2A	-2.38063	0.553608	NA	None	None	0.256797
NTRK1	-1.24679	0.759946	NA	None	synapse organization	0.119217
PEAR1	NA	NA	NA	None	None	NA
LRRC71	NA	NA	NA	None	None	NA
ARHGEF11	-0.491096	0.199066	0.397739	None	None	0.701003
ETV3L	NA	NA	NA	None	None	NA
ETV3	0.158993	0.513382	0.707321	None	None	0.289559
FCRL2	NA	NA	NA	None	None	NA
CD5L	NA	NA	NA	None	None	NA
KIRREL1	-1.24679	0.759946	NA	None	None	0.119217
LINC01704	NA	NA	NA	None	None	NA
OR10K1	NA	NA	NA	None	None	NA
PYHIN1	NA	NA	NA	None	None	NA
IFI16	-0.151488	0.859812	0.928351	None	None	0.0655965
CFAP45	-6.21206	6.40252e-05	0.00119103	None	None	4.19365
AL590560.5	-2.85377	0.474232	NA	None	None	0.324009
TAGLN2	-0.189464	0.688141	0.831014	None	None	0.162323
IGSF9	NA	NA	NA	None	None	NA
LINC01133	-2.73832	0.493022	NA	None	None	0.307134
KCNJ10	-3.20233	0.22805	0.431159	None	sensory perception of light stimulus	0.64197
PIGM	-1.02732	0.368052	0.578673	None	None	0.434091
AL121987.1	NA	NA	NA	None	None	NA
KCNJ9	NA	NA	NA	None	None	NA
IGSF8	0.149171	0.724204	0.853013	None	None	0.140139
ATP1A2	NA	NA	NA	None	None	NA
ATP1A4	0.228405	0.941547	0.971971	None	None	0.026158
CASQ1	-1.84691	0.637278	NA	None	calcium ion homeostasis	0.195671
AL121987.2	-2.88411	0.121375	0.29273	None	None	0.915873
PEA15	-0.096414	0.785795	0.889178	None	None	0.104691
DCAF8	-0.138906	0.545079	0.731398	None	None	0.263541
AL139011.1	-5.02569	0.0177485	0.0835722	None	None	1.75084
PEX19	-0.271495	0.41453	0.623416	None	None	0.382444
COPA	0.162438	0.43848	0.644419	None	None	0.358051
NCSTN	0.1701	0.488134	0.687417	None	None	0.311461
NHLH1	-2.22278	0.581402	NA	None	None	0.235523
SLAMF6	NA	NA	NA	None	None	NA
CD84	NA	NA	NA	None	None	NA
AL121985.1	NA	NA	NA	None	None	NA
SLAMF7	NA	NA	NA	None	None	NA
LY9	NA	NA	NA	None	None	NA
AL354714.1	NA	NA	NA	None	None	NA
F11R	-0.408745	0.318679	0.530029	None	None	0.496647
TSTD1	-0.913591	0.014536	0.0729068	None	None	1.83755
USF1	-0.439004	0.207236	0.407045	None	None	0.683535
ARHGAP30	-0.58987	0.310992	0.522768	None	None	0.507251
NECTIN4	-1.71612	1.38404e-06	5.53473e-05	None	None	5.85885
AL591806.1	-4.96325	0.171351	0.362589	None	None	0.766114
KLHDC9	-0.285021	0.944313	NA	None	None	0.024884
PFDN2	1.05059	0.000768095	0.00860358	None	None	3.11459
NIT1	-0.486702	0.0414679	0.146503	None	None	1.38229
DEDD	0.173183	0.490715	0.689424	None	None	0.30917
UFC1	0.53449	0.0883908	0.239937	None	None	1.05359
AL590714.1	0.585252	0.638369	0.797323	None	None	0.194928
USP21	-0.0372782	0.920351	0.96196	None	None	0.0360466
PPOX	-0.443432	0.10555	0.268622	None	None	0.976544
B4GALT3	0.999509	9.26514e-05	0.00161427	None	None	4.03315
ADAMTS4	NA	NA	NA	None	None	NA
NDUFS2	0.00182203	0.991773	0.9968	None	None	0.00358769
FCER1G	NA	NA	NA	None	None	NA
TOMM40L	0.373502	0.844687	0.920854	None	None	0.0733044
NR1I3	-4.9795	0.0452442	0.15488	None	None	1.34444
PCP4L1	0.296101	0.641632	0.799979	None	None	0.192714
MPZ	-3.63042	0.033663	0.128349	None	None	1.47285
SDHC	-0.0836356	0.759592	0.873894	None	None	0.119419
CFAP126	NA	NA	NA	None	None	NA
AL592295.4	-3.56569	0.00388595	0.0284965	None	None	2.4105
AL592295.5	-6.08674	0.00745872	0.0455148	None	None	2.12734
AL592295.3	-2.78459	0.0545343	0.175589	None	None	1.26333
FCGR2A	-1.24679	0.759946	NA	None	None	0.119217
HSPA6	3.91572	0.319562	NA	None	None	0.495445
FCGR2B	-3.83294	0.331638	NA	None	synapse organization	0.479335
FCRLB	-6.59698	0.000545536	0.00654609	None	None	3.26318
DUSP12	0.258512	0.313935	0.525152	None	None	0.50316
AL359541.1	NA	NA	NA	None	None	NA
ATF6	0.491658	0.111512	0.277549	None	None	0.95268
NOS1AP	1.34078	0.00306697	0.0240494	None	None	2.51329
AL450163.1	-0.376277	0.791038	0.89215	None	None	0.101803
C1orf226	0.428264	0.91569	NA	None	None	0.0382517
SH2D1B	NA	NA	NA	None	None	NA
UHMK1	-0.197847	0.460798	0.664196	None	None	0.33649
AL596325.1	NA	NA	NA	None	None	NA
UAP1	0.519847	0.12913	0.304016	None	None	0.888973
AL596325.2	NA	NA	NA	None	None	NA
HSD17B7	0.154226	0.602262	0.772598	None	None	0.220215
CCDC190	-2.85377	0.474232	NA	None	None	0.324009
RGS5	-0.0817033	0.89438	0.948159	None	None	0.0484779
AL499616.1	-1.76466	0.0510448	0.168442	None	None	1.29205
AL592435.1	-1.50978	0.328889	0.539379	None	None	0.48295
AL592435.2	NA	NA	NA	None	None	NA
NUF2	-1.03304	0.00846849	0.0497077	None	None	2.07219
PBX1	0.146648	0.720692	0.850827	None	None	0.14225
AL391001.1	NA	NA	NA	None	None	NA
AL357568.1	-3.41004	0.213638	0.414985	None	None	0.670322
AL357568.2	-0.442305	0.759606	0.873894	None	None	0.119412
LRRC52-AS1	NA	NA	NA	None	None	NA
AL356441.1	-4.08802	0.0303851	0.120209	None	None	1.51734
MGST3	-0.212077	0.157392	0.343519	None	None	0.803018
ALDH9A1	-0.271999	0.270082	0.478978	None	None	0.568504
TMCO1	-0.0375269	0.90211	0.952185	None	None	0.0447404
TMCO1-AS1	-1.38184	0.208508	0.408375	None	None	0.680877
UCK2	2.48995	3.76759e-11	8.14265e-09	None	None	10.4239
AL358115.1	1.65527	0.0189581	0.0870514	None	None	1.72221
FAM78B	NA	NA	NA	None	None	NA
AL596087.2	NA	NA	NA	None	None	NA
AL583804.1	NA	NA	NA	None	None	NA
POGK	-0.489367	0.0343074	0.129819	None	None	1.46461
TADA1	0.00234761	0.994333	0.997429	None	None	0.00246824
ILDR2	0.353756	0.78573	0.889178	None	None	0.104727
MAEL	0.67676	0.868272	NA	None	None	0.061344
GPA33	0.39241	0.407071	0.617115	None	None	0.39033
DUSP27	0.279693	0.839537	0.91852	None	None	0.07596
LINC01363	-1.24679	0.759946	NA	None	None	0.119217
AL451050.2	-0.113963	0.794283	0.893694	None	None	0.100025
POU2F1	0.643361	0.00972136	0.0546596	None	None	2.01227
AL136984.1	-0.285021	0.944313	NA	None	None	0.024884
CD247	0.80399	0.451967	0.656749	None	None	0.344894
AL359962.3	NA	NA	NA	None	None	NA
CREG1	-0.0433184	0.912919	0.958149	None	None	0.0395678
RCSD1	-2.97188	0.0819307	0.228641	None	None	1.08655
MPZL1	1.00436	0.000124173	0.00203195	None	None	3.90597
ADCY10	0.931286	0.0106286	0.0584726	None	None	1.97352
Z99943.1	0.67676	0.868272	NA	None	None	0.061344
MPC2	0.272616	0.32459	0.53583	None	None	0.488665
DCAF6	0.623428	0.0687104	0.205065	None	None	1.16298
GPR161	-2.17815	0.0970743	0.25519	None	None	1.0129
TIPRL	-0.399126	0.166002	0.35581	None	None	0.779888
SFT2D2	0.0762777	0.781683	0.88735	None	None	0.106969
TBX19	0.27529	0.561254	0.742981	None	None	0.25084
AL023755.1	-1.04552	0.0392842	0.141703	None	None	1.40578
XCL2	NA	NA	NA	None	None	NA
XCL1	-6.2662	0.00462985	0.0323484	None	calcium ion homeostasis	2.33443
DPT	-1.24679	0.759946	NA	None	None	0.119217
LINC00970	-3.25207	0.0716114	0.21078	None	None	1.14502
AL031726.1	0.67676	0.868272	NA	None	None	0.061344
ATP1B1	1.90476	0.00388545	0.0284965	None	None	2.41056
NME7	1.50211	0.0668057	0.200971	None	None	1.17519
Z99758.1	1.71291	0.299805	0.511699	None	None	0.523161
BLZF1	-0.273053	0.277172	0.486797	None	None	0.557251
CCDC181	1.37213	0.00159127	0.0147013	None	None	2.79826
SLC19A2	1.29079	1.62068e-05	0.000405381	None	None	4.7903
Z99572.1	0.162441	0.58721	0.762553	None	None	0.231207
F5	0.0215392	0.982628	0.992639	None	None	0.00761105
SELP	-1.12598	0.771751	NA	None	None	0.112523
C1orf112	-0.0498568	0.858176	0.927837	None	None	0.0664237
SELE	NA	NA	NA	None	None	NA
METTL18	-0.910948	0.0254732	0.107029	None	None	1.59392
SCYL3	0.505284	0.0133379	0.0685791	None	None	1.87491
KIFAP3	-0.664033	0.151971	0.336369	None	None	0.818239
METTL11B	NA	NA	NA	None	None	NA
LINC01681	NA	NA	NA	None	None	NA
GORAB-AS1	-1.24679	0.759946	NA	None	None	0.119217
GORAB	-0.194114	0.494429	0.692545	None	None	0.305896
AL023495.1	-1.24679	0.759946	NA	None	None	0.119217
PRRX1	NA	NA	NA	None	None	NA
BX284613.2	-1.3597	0.0150839	0.0748747	None	None	1.82149
MROH9	-2.97799	0.0151459	0.0750853	None	None	1.81971
FMO3	-4.50211	0.107532	0.27169	None	None	0.968463
FMO2	-2.61495	0.513522	NA	None	None	0.289441
FMO1	-4.83444	2.12908e-05	0.000501873	None	None	4.67181
FMO4	-1.83096	0.00384037	0.0282592	None	None	2.41563
PRRC2C	0.775232	0.00027698	0.00384673	None	None	3.55755
MYOCOS	2.13685	0.00138599	0.0132503	None	None	2.85824
MYOC	4.88256	0.0157993	0.0773366	None	None	1.80136
VAMP4	-0.445538	0.21804	0.419315	None	None	0.661465
EEF1AKNMT	-0.171057	0.470826	0.672584	None	None	0.327139
DNM3	-0.37462	0.456445	0.660775	None	None	0.340611
DNM3OS	NA	NA	NA	None	None	NA
PIGC	-0.617107	0.0958723	0.253302	None	None	1.01831
C1orf105	-3.7977	0.00294356	0.0233578	None	None	2.53113
SUCO	-0.187016	0.477715	0.679039	None	None	0.320831
AL031599.1	-1.15718	0.0583036	0.183067	None	None	1.2343
TNFSF18	NA	NA	NA	None	None	NA
TNFSF4	1.91588	0.606905	NA	None	None	0.216879
AL645568.1	0.179055	0.395857	0.605607	None	None	0.402462
PRDX6	0.997184	5.88194e-06	0.000181604	None	None	5.23048
SLC9C2	-0.927967	0.603508	0.773743	None	None	0.219317
AL139142.1	-1.24679	0.759946	NA	None	None	0.119217
ANKRD45	-0.139618	0.942197	0.97237	None	None	0.0258585
KLHL20	-0.0323023	0.932621	0.96779	None	None	0.0302949
CENPL	1.16572	0.00269799	0.0218325	None	None	2.56896
DARS2	0.594392	0.0676146	0.202549	None	None	1.16996
GAS5	0.388013	0.238938	0.444135	None	None	0.621715
GAS5-AS1	-4.28537	0.00355842	0.0268311	None	None	2.44874
ZBTB37	-0.870621	0.054259	0.174995	None	None	1.26553
SERPINC1	NA	NA	NA	None	None	NA
RC3H1	0.0484121	0.773649	0.882211	None	None	0.111456
RC3H1-IT1	-3.20001	0.138343	0.316903	None	None	0.859041
LINC02776	-3.98617	0.312165	NA	None	None	0.505616
RABGAP1L-DT	2.60571	0.511987	NA	None	None	0.290741
RABGAP1L	0.661013	1.57046e-05	0.000396427	None	None	4.80397
GPR52	NA	NA	NA	None	None	NA
RABGAP1L-IT1	-0.656189	0.819021	0.906929	None	None	0.0867049
Z99127.1	0.682384	0.12745	0.301583	None	None	0.894658
Z99127.4	-0.597741	0.0337379	0.12853	None	None	1.47188
CACYBP	0.131933	0.497611	0.694865	None	None	0.30311
MRPS14	-0.343025	0.116361	0.285021	None	None	0.934191
TNN	-2.38063	0.553608	NA	None	None	0.256797
KIAA0040	0.182755	0.58477	0.760722	None	None	0.233015
Z94057.1	-0.285021	0.944313	NA	None	None	0.024884
TNR	0.312717	0.783639	0.88766	None	None	0.105884
LINC02803	1.08749	0.0168521	0.080494	None	None	1.77335
COP1	0.371855	0.0422156	0.148016	None	None	1.37453
AL590723.1	-5.15812	0.120218	0.290721	None	None	0.92003
AL591043.2	-0.433173	0.213652	0.414985	None	None	0.670293
PAPPA2	-1.99977	0.00318293	0.0247092	None	None	2.49717
AL031290.1	-1.24679	0.759946	NA	None	None	0.119217
ASTN1	-2.00337	0.620987	NA	None	None	0.206917
BRINP2	-1.24679	0.759946	NA	None	None	0.119217
LINC01645	NA	NA	NA	None	None	NA
AL136114.1	-0.172861	0.89105	0.946246	None	None	0.0500979
SEC16B	-4.45051	0.0641455	0.195382	None	None	1.19283
RASAL2-AS1	0.368208	0.489722	0.688632	None	None	0.310051
RASAL2	1.36326	4.21386e-06	0.000137147	None	None	5.37532
CLEC20A	-3.55808	0.0882429	0.239638	None	None	1.05432
TEX35	4.41585	0.260691	0.468373	None	None	0.583873
C1orf220	NA	NA	NA	None	None	NA
AL449106.1	NA	NA	NA	None	None	NA
RALGPS2	-0.382591	0.222576	0.424391	None	None	0.652521
ANGPTL1	-1.43829	0.000618184	0.00723723	None	None	3.20888
FAM20B	0.092883	0.788834	0.890918	None	None	0.103014
TOR3A	0.0361208	0.93948	0.970826	None	None	0.0271125
ABL2	0.305705	0.148707	0.331675	None	None	0.827668
SOAT1	-0.157735	0.622997	0.786412	None	None	0.205514
AXDND1	-1.41063	0.227098	0.429901	None	None	0.643788
NPHS2	NA	NA	NA	None	None	NA
TDRD5	-0.634598	0.642533	0.800653	None	None	0.192105
FAM163A	3.24607	0.000473587	0.00586194	None	None	3.3246
LINC02818	0.0964508	0.925564	0.963752	None	None	0.0335935
TOR1AIP2	0.0113659	0.959645	0.981295	None	None	0.0178895
AL353708.3	-0.333228	0.372894	0.583773	None	None	0.428415
TOR1AIP1	0.303493	0.328181	0.53889	None	None	0.483886
[truncated: 27,066 more rows]

## Sheet: STB2
gene name	log2FoldChange	pvalue	padj	GotermSTBout	GotermSTBin	pvalue_transformed
CTH	1.28206	0.0579546	0.211546	sulfur compound metabolic process	None	1.23691
GCLM	1.04843	0.0532824	0.201115	sulfur compound metabolic process	None	1.27342
THEM5	1.97052	0.102898	0.297122	sulfur compound metabolic process	None	0.987594
SLC5A6	1.97034	3.57779e-11	7.45538e-09	sulfur compound metabolic process	None	10.4464
SLC19A3	1.261	1.71707e-05	0.000500464	sulfur compound metabolic process	None	4.76521
SUCLG2	1.16538	0.00153394	0.0174748	sulfur compound metabolic process	None	2.81419
ST3GAL6	1.03926	0.0216487	0.113792	sulfur compound metabolic process	None	1.66457
HACD2	1.05168	0.00027584	0.00460895	sulfur compound metabolic process	None	3.55934
PXYLP1	1.30312	0.00271402	0.0267259	sulfur compound metabolic process	None	2.56639
HPSE	1.82979	0.00641323	0.0491401	sulfur compound metabolic process	None	2.19292
ELOVL6	2.39813	4.0164e-11	8.18127e-09	sulfur compound metabolic process	None	10.3962
SLC10A7	1.56467	3.2232e-08	2.85041e-06	sulfur compound metabolic process	None	7.49171
GHR	1.51676	0.00802364	0.057582	sulfur compound metabolic process	None	2.09563
NDST1	2.16217	4.42077e-06	0.00016593	sulfur compound metabolic process	None	5.3545
LYRM4	1.95141	1.34603e-08	1.34078e-06	sulfur compound metabolic process	None	7.87095
AHCYL2	1.09264	7.28428e-05	0.00165071	sulfur compound metabolic process	None	4.13761
CSGALNACT1	1.01159	0.00178614	0.0195301	sulfur compound metabolic process	None	2.74808
EXT1	2.38884	3.21305e-07	2.0296e-05	sulfur compound metabolic process	None	6.49308
ST3GAL1	1.63987	0.000740045	0.0101716	sulfur compound metabolic process	None	3.13074
FXN	1.17935	0.00141937	0.016462	sulfur compound metabolic process	None	2.8479
CHST3	1.8559	0.368086	0.616097	sulfur compound metabolic process	None	0.434051
PAPSS2	2.42937	0.000945156	0.0122216	sulfur compound metabolic process	None	3.0245
MICAL2	1.11375	0.016827	0.0957489	sulfur compound metabolic process	None	1.77399
GLYAT	1.98486	0.621534	NA	sulfur compound metabolic process	None	0.206535
CHST11	2.62518	2.71466e-10	4.68705e-08	sulfur compound metabolic process	None	9.56628
EDNRB	2.19138	0.000609881	0.00872654	sulfur compound metabolic process	None	3.21476
HS6ST3	1.37768	0.0355503	0.156089	sulfur compound metabolic process	None	1.44916
ACOT4	3.75739	0.148747	0.366609	sulfur compound metabolic process	None	0.827553
CHSY1	1.17971	0.00379101	0.0339897	sulfur compound metabolic process	None	2.42125
HS3ST3A1	2.05996	0.229377	0.475351	sulfur compound metabolic process	None	0.639451
HS3ST3B1	1.08748	0.305114	0.557657	sulfur compound metabolic process	None	0.515538
ACACA	1.71652	6.97352e-17	5.05692e-14	sulfur compound metabolic process	None	16.1565
ACLY	1.08765	6.40158e-05	0.00148978	sulfur compound metabolic process	None	4.19371
STAT5A	1.05544	0.0342167	0.15253	sulfur compound metabolic process	None	1.46576
PDK2	1.22922	0.321283	0.57193	sulfur compound metabolic process	None	0.493113
DSEL	1.75497	0.000238853	0.00413184	sulfur compound metabolic process	None	3.62187
ACSS1	1.02853	0.176193	0.404024	sulfur compound metabolic process	None	0.75401
GGT5	2.47211	0.535366	NA	sulfur compound metabolic process	None	0.27135
SCNN1D	2.2434	0.575105	NA	sodium ion transport	None	0.240253
SLC6A9	2.34885	0.00560364	0.0447921	sodium ion transport	None	2.25153
ATP1A1	1.3443	5.83185e-05	0.00137843	sodium ion transport	None	4.23419
ATP1A4	1.09888	0.744619	0.884846	sodium ion transport	None	0.128066
ATP1B1	1.90418	0.00454209	0.0385805	sodium ion transport	None	2.34274
PRKCE	2.98698	1.51314e-18	1.82879e-15	sodium ion transport	None	17.8201
COMMD1	1.10601	0.00903188	0.0628719	sodium ion transport	None	2.04422
SLC20A1	1.01218	0.00133784	0.0158165	sodium ion transport	None	2.8736
SLC4A10	1.06855	0.370135	0.617425	sodium ion transport	None	0.43164
HECW2	1.4556	0.0670163	0.231373	sodium ion transport	None	1.17382
SLC6A11	1.0284	0.121494	0.32621	sodium ion transport	None	0.915444
ATP1B3	1.25129	0.000543081	0.00795276	sodium ion transport	None	3.26514
SLC4A4	2.81484	0.000376957	0.00592703	sodium ion transport	None	3.42371
SLC10A6	1.23962	0.00237784	0.0241907	sodium ion transport	None	2.62382
CAMK2D	1.24545	0.51612	0.742422	sodium ion transport	None	0.287249
SLC6A3	3.59004	0.00288322	0.0279219	sodium ion transport	None	2.54012
SLC22A4	1.08209	0.0390391	0.164744	sodium ion transport	None	1.4085
SLC22A5	1.42205	0.00515576	0.042128	sodium ion transport	None	2.28771
ADRB2	1.02308	0.799139	NA	sodium ion transport	None	0.0973778
CNKSR3	1.01995	0.0846101	0.264784	sodium ion transport	None	1.07258
SLC24A2	2.39934	1.16728e-05	0.00036867	sodium ion transport	None	4.93282
WNK2	1.36789	0.00349027	0.0320964	sodium ion transport	None	2.45714
ANK3	2.0057	1.02706e-06	5.0199e-05	sodium ion transport	None	5.9884
SLC6A15	2.61072	0.127515	0.335901	sodium ion transport	None	0.89444
SLC17A8	2.80694	0.108693	0.306042	sodium ion transport	None	0.963799
NALCN	1.49931	0.129791	0.339087	sodium ion transport	None	0.886757
SLC8A3	3.88557	0.276204	NA	sodium ion transport	None	0.55877
SLC6A2	1.41287	6.58535e-09	7.38793e-07	sodium ion transport	None	8.18142
SLC6A4	1.43028	0.063756	0.224777	sodium ion transport	None	1.19548
FXYD3	1.04613	0.00827043	0.0589134	sodium ion transport	None	2.08247
SLC23A2	1.21668	2.79457e-05	0.000746137	sodium ion transport	None	4.55369
ARHGEF10L	1.00098	0.00349433	0.0320964	small GTPase mediated signal transduction	None	2.45664
DAB1	1.09422	0.0157224	0.0920401	small GTPase mediated signal transduction	None	1.80348
GPSM2	1.12153	1.35611e-06	6.35968e-05	small GTPase mediated signal transduction	None	5.8677
MYOC	1.67599	0.678795	NA	small GTPase mediated signal transduction	None	0.168262
RGL1	1.13967	0.0384633	0.163264	small GTPase mediated signal transduction	None	1.41495
CHML	1.05478	0.00786711	0.0566672	small GTPase mediated signal transduction	None	2.10418
PSD4	1.47938	1.42595e-05	0.000435937	small GTPase mediated signal transduction	None	4.8459
ARHGAP15	1.68844	0.0220313	0.114853	small GTPase mediated signal transduction	None	1.65696
ITGAV	2.1021	3.37834e-21	6.9737e-18	small GTPase mediated signal transduction	None	20.4713
ARHGEF3	1.19162	0.00107562	0.0134112	small GTPase mediated signal transduction	None	2.96834
ROBO1	1.55666	9.65148e-06	0.000314132	small GTPase mediated signal transduction	None	5.01541
RASA2	1.89448	4.05545e-30	3.67606e-26	small GTPase mediated signal transduction	None	29.392
ARHGAP10	1.43995	5.84758e-06	0.000209508	small GTPase mediated signal transduction	None	5.23302
ARHGAP18	1.71156	2.58e-08	2.33864e-06	small GTPase mediated signal transduction	None	7.58838
PLEKHG1	1.39153	0.011466	0.0741325	small GTPase mediated signal transduction	None	1.94059
CYTH3	1.63329	0.0007507	0.010279	small GTPase mediated signal transduction	None	3.12453
ELMO1	2.58578	1.59902e-05	0.000476003	small GTPase mediated signal transduction	None	4.79615
PSD3	1.26386	0.0624365	0.221639	small GTPase mediated signal transduction	None	1.20456
GPR20	2.75746	0.48774	NA	small GTPase mediated signal transduction	None	0.311811
FGD3	1.51957	0.0759538	0.24882	small GTPase mediated signal transduction	None	1.11945
DENND1A	1.50759	6.27165e-10	9.80161e-08	small GTPase mediated signal transduction	None	9.20262
RHOBTB1	1.54557	1.52998e-14	6.60406e-12	small GTPase mediated signal transduction	None	13.8153
LIPA	1.66873	4.84876e-08	4.03226e-06	small GTPase mediated signal transduction	None	7.31437
PLCE1	1.47649	0.0151653	0.0899054	small GTPase mediated signal transduction	None	1.81915
GBF1	1.03151	1.87183e-06	8.1967e-05	small GTPase mediated signal transduction	None	5.72773
DOCK1	1.0376	0.00216321	0.0225217	small GTPase mediated signal transduction	None	2.6649
RASGRP2	1.28577	0.258991	0.507811	small GTPase mediated signal transduction	None	0.586716
RHOD	1.49089	5.18586e-07	2.97514e-05	small GTPase mediated signal transduction	None	6.28518
RAB38	1.41409	0.00112521	0.0138392	small GTPase mediated signal transduction	None	2.94877
ARHGAP42	3.05312	2.29068e-05	0.000634011	small GTPase mediated signal transduction	None	4.64004
RAB39A	1.30375	0.000254359	0.00433908	small GTPase mediated signal transduction	None	3.59455
RDX	1.42479	3.01733e-05	0.000795075	small GTPase mediated signal transduction	None	4.52038
ARHGAP20	1.20414	0.463254	0.699394	small GTPase mediated signal transduction	None	0.334181
ARHGEF12	1.13062	8.92297e-05	0.00194208	small GTPase mediated signal transduction	None	4.04949
EPS8	1.1309	0.00559177	0.0447169	small GTPase mediated signal transduction	None	2.25245
FGD4	1.28177	0.000308826	0.0050759	small GTPase mediated signal transduction	None	3.51029
RAP1B	1.22522	5.78111e-07	3.1763e-05	small GTPase mediated signal transduction	None	6.23799
KSR2	1.18872	0.195657	0.430939	small GTPase mediated signal transduction	None	0.708506
STARD13	3.1393	4.36996e-15	2.26352e-12	small GTPase mediated signal transduction	None	14.3595
SOS2	1.49425	3.55845e-06	0.00013814	small GTPase mediated signal transduction	None	5.44874
RHOV	1.19905	8.67427e-05	0.00189806	small GTPase mediated signal transduction	None	4.06177
AKAP13	1.4863	5.89692e-09	6.76615e-07	small GTPase mediated signal transduction	None	8.22937
ARHGAP17	1.30537	0.000322669	0.00526996	small GTPase mediated signal transduction	None	3.49124
TP53	1.08053	0.00786013	0.0566586	small GTPase mediated signal transduction	None	2.10457
GRAP	2.05751	0.519044	0.744095	small GTPase mediated signal transduction	None	0.284796
RAPGEFL1	1.15993	0.0125377	0.0790542	small GTPase mediated signal transduction	None	1.90178
RIT2	1.23195	0.0167859	0.0956696	small GTPase mediated signal transduction	None	1.77506
RAB4B	1.02862	1.01382e-06	5.00883e-05	small GTPase mediated signal transduction	None	5.99404
TIAM1	1.23674	0.00183619	0.0199596	small GTPase mediated signal transduction	None	2.73608
ITSN1	1.12479	0.00108157	0.0134488	small GTPase mediated signal transduction	None	2.96595
BCR	1.75237	8.23883e-09	8.83797e-07	small GTPase mediated signal transduction	None	8.08413
ARHGAP8	1.33716	0.000442314	0.00676685	small GTPase mediated signal transduction	None	3.35427
OPHN1	1.56588	2.47991e-07	1.64683e-05	small GTPase mediated signal transduction	None	6.60556
AMOT	1.83342	0.000105056	0.00220946	small GTPase mediated signal transduction	None	3.97858
FRMD7	2.0552	0.353434	0.60322	small GTPase mediated signal transduction	None	0.451692
MCF2	1.27514	0.750044	NA	small GTPase mediated signal transduction	None	0.124913
AL627309.1	NA	NA	NA	None	None	NA
AL627309.5	0.547041	0.305884	0.558567	None	None	0.514444
AL627309.4	NA	NA	NA	None	None	NA
AP006222.2	-1.04853	0.797207	NA	None	None	0.0984286
AC114498.1	-4.17032	0.116029	0.316742	None	None	0.935435
AL669831.2	-5.12944	0.069443	0.236552	None	None	1.15837
LINC01409	-0.304195	0.350598	0.600755	None	None	0.455191
FAM87B	-4.45476	0.169335	0.395093	None	None	0.771253
LINC01128	0.294611	0.517761	0.743243	None	None	0.28587
LINC00115	-0.202716	0.655678	0.831709	None	None	0.18331
FAM41C	NA	NA	NA	None	None	NA
AL645608.6	NA	NA	NA	None	None	NA
AL645608.2	NA	NA	NA	None	None	NA
SAMD11	NA	NA	NA	None	None	NA
NOC2L	-0.325179	0.347573	0.598412	None	None	0.458954
KLHL17	-6.14245	0.000312394	0.00511136	None	None	3.5053
PLEKHN1	-1.21383	0.146587	0.363738	None	None	0.833906
PERM1	-2.84053	0.475168	NA	None	None	0.323153
AL645608.7	NA	NA	NA	None	None	NA
HES4	-1.14518	0.125496	0.332523	None	None	0.901369
ISG15	0.25197	0.566831	0.776549	None	None	0.246547
AL645608.1	-3.53245	0.365845	NA	None	None	0.436703
AGRN	-0.774835	0.359883	0.60912	None	None	0.443838
RNF223	-2.34585	0.0125944	0.0792241	None	None	1.89982
C1orf159	-0.0293557	0.927239	0.971941	None	None	0.0328082
AL390719.3	-0.613248	0.218226	0.461528	None	None	0.661093
TTLL10	NA	NA	NA	None	None	NA
SDF4	-0.121827	0.610182	0.804551	None	None	0.21454
B3GALT6	0.540054	0.602574	0.800063	None	None	0.21999
C1QTNF12	-5.19242	0.0170634	0.0965789	None	None	1.76793
AL162741.1	NA	NA	NA	None	None	NA
UBE2J2	-0.276482	0.161484	0.383789	None	None	0.791871
LINC01786	NA	NA	NA	None	None	NA
ACAP3	-0.320265	0.405847	0.650828	None	None	0.391637
PUSL1	0.497703	0.258893	0.507751	None	None	0.586879
INTS11	-0.152499	0.558189	0.770299	None	None	0.253218
CPTP	0.941869	0.0366978	0.159162	None	None	1.43536
TAS1R3	NA	NA	NA	None	None	NA
DVL1	0.273113	0.355088	0.604668	None	None	0.449664
MXRA8	0.352211	0.760211	0.892538	None	None	0.119066
AURKAIP1	0.353759	0.261682	0.511101	None	None	0.582225
CCNL2	-0.376957	0.159973	0.38204	None	None	0.795953
MRPL20-AS1	-0.279878	0.587449	0.790801	None	None	0.23103
MRPL20	0.413371	0.0965079	0.286208	None	None	1.01544
AL391244.2	-0.770356	0.685941	0.850329	None	None	0.163713
ANKRD65	-6.05382	0.0158318	0.092377	None	None	1.80047
AL391244.1	NA	NA	NA	None	None	NA
LINC01770	-4.35223	0.193123	NA	None	None	0.714165
VWA1	0.0178404	0.944542	0.979096	None	None	0.0247788
ATAD3C	-0.596031	0.17194	0.398861	None	None	0.764623
ATAD3B	0.515758	0.10335	0.297774	None	None	0.985688
ATAD3A	0.31458	0.286869	0.538647	None	None	0.542317
TMEM240	-4.51464	0.153616	0.372911	None	None	0.813564
SSU72	-0.322577	0.295574	0.54818	None	None	0.529334
AL645728.1	-0.730047	0.179793	0.409378	None	None	0.745227
FNDC10	-1.04853	0.797207	NA	None	None	0.0984286
AL691432.4	-5.51269	0.121563	0.326297	None	None	0.9152
AL691432.2	-0.501324	0.368746	0.616697	None	None	0.433273
MIB2	-0.977712	0.0244451	0.123101	None	None	1.61181
MMP23B	-0.970402	0.540418	0.75742	None	None	0.26727
CDK11B	-0.188998	0.648034	0.826873	None	None	0.188402
FO704657.1	-4.44964	0.0268935	0.130308	None	None	1.57035
SLC35E2B	-0.074996	0.774234	0.899031	None	None	0.111128
CDK11A	-0.607558	0.191377	0.425038	None	None	0.71811
SLC35E2A	-0.205444	0.740503	0.882383	None	None	0.130473
NADK	0.36192	0.21375	0.455356	None	None	0.670093
GNB1	-0.1823	0.465332	0.700401	None	None	0.332237
AL109917.1	NA	NA	NA	None	None	NA
CALML6	NA	NA	NA	None	None	NA
TMEM52	-2.59791	0.515049	NA	None	None	0.288152
CFAP74	0.64577	0.345833	0.596574	None	None	0.461134
AL391845.2	NA	NA	NA	None	None	NA
GABRD	NA	NA	NA	None	None	NA
AL391845.1	NA	NA	NA	None	None	NA
PRKCZ	0.186398	0.418933	0.662032	None	None	0.377855
AL590822.2	-0.338952	0.341907	0.593038	None	None	0.466092
PRKCZ-AS1	-1.73196	0.354393	0.604321	None	None	0.450515
FAAP20	-0.566493	0.0339943	0.152131	None	None	1.46859
AL590822.1	-2.89577	0.438849	NA	None	None	0.357685
SKI	0.685443	0.0103405	0.0692767	None	None	1.98546
AL590822.3	NA	NA	NA	None	None	NA
MORN1	-0.341337	0.442667	0.683081	None	None	0.353923
AL513477.2	NA	NA	NA	None	None	NA
RER1	0.180674	0.50486	0.733555	None	None	0.296829
PEX10	0.0781809	0.736834	0.88068	None	None	0.13263
PANK4	-0.48462	0.0969274	0.28703	None	None	1.01355
AL139246.5	-0.685289	0.240553	0.488784	None	None	0.61879
TNFRSF14-AS1	NA	NA	NA	None	None	NA
TNFRSF14	-1.89747	0.638773	NA	None	None	0.194653
PRXL2B	NA	NA	NA	None	None	NA
TTC34	-2.63041	0.50961	NA	None	None	0.292762
PRDM16	-1.04853	0.797207	NA	None	None	0.0984286
ARHGEF16	-0.145884	0.786304	0.904341	None	None	0.104409
AL512413.1	NA	NA	NA	None	None	NA
MEGF6	-3.49177	0.194981	0.43013	None	None	0.710008
AL513320.1	NA	NA	NA	None	None	NA
TPRG1L	-0.569641	0.296424	0.549054	None	None	0.528087
WRAP73	0.379391	0.43129	0.673227	None	None	0.365231
TP73	0.73679	0.652596	0.829716	None	None	0.185355
AL136528.1	2.66382	0.503117	NA	None	None	0.298331
CCDC27	NA	NA	NA	None	None	NA
SMIM1	-1.31011	0.662898	NA	None	None	0.178553
LRRC47	-0.54639	0.0180361	0.100146	None	None	1.74386
CEP104	-0.746661	0.0926022	0.279193	None	None	1.03338
DFFB	-1.01384	0.256569	0.504757	None	None	0.590796
C1orf174	-0.71209	0.0463753	0.184211	None	None	1.33371
LINC01134	-0.472699	0.793857	0.908683	None	None	0.100258
LINC02780	NA	NA	NA	None	None	NA
AL805961.1	NA	NA	NA	None	None	NA
AJAP1	NA	NA	NA	None	None	NA
Z98886.1	NA	NA	NA	None	None	NA
AL365255.1	NA	NA	NA	None	None	NA
NPHP4	0.0546222	0.96145	0.986227	None	None	0.0170733
KCNAB2	0.594715	0.853955	0.940067	None	None	0.068565
CHD5	-1.04853	0.797207	NA	None	None	0.0984286
RPL22	0.0913832	0.748712	0.887086	None	None	0.125685
RNF207	0.685554	0.0773312	0.25174	None	None	1.11165
ICMT	0.736362	0.00615688	0.0476797	None	None	2.21064
LINC00337	-0.45746	0.312622	0.564438	None	None	0.504981
GPR153	-3.95914	0.112469	0.311634	None	None	0.948966
ACOT7	0.489348	0.182479	0.413261	None	None	0.738788
AL031848.2	-0.0778828	0.960544	0.98583	None	None	0.0174826
HES2	0.510107	0.0646223	0.226122	None	None	1.18962
ESPN	0.749068	0.0427435	0.174316	None	None	1.36913
AL031848.1	NA	NA	NA	None	None	NA
TNFRSF25	-1.86031	0.000183092	0.00335387	None	None	3.73733
PLEKHG5	-0.427642	0.526633	0.748615	None	None	0.278492
NOL9	0.277638	0.375046	0.621841	None	None	0.425915
TAS1R1	4.02424	0.260647	NA	None	None	0.583947
ZBTB48	-0.767467	0.0613888	0.219684	None	None	1.21191
KLHL21	0.382315	0.224828	0.470387	None	None	0.64815
PHF13	0.292092	0.536028	0.754248	None	None	0.270813
THAP3	-0.261396	0.535433	0.753756	None	None	0.271295
DNAJC11	0.714285	0.00660066	0.0502667	None	None	2.18041
LINC01672	NA	NA	NA	None	None	NA
AL591163.1	-3.71007	0.151295	0.369848	None	None	0.820175
CAMTA1-DT	-1.06131	0.0830364	0.262063	None	None	1.08073
CAMTA1	0.228307	0.315638	0.567555	None	None	0.500811
AL512330.1	-4.84734	0.102316	0.295977	None	None	0.990057
Z97987.1	-3.371	0.394156	NA	None	None	0.404332
VAMP3	-0.684337	0.0202131	0.108255	None	None	1.69437
Z98884.2	NA	NA	NA	None	None	NA
PER3	-0.610076	0.559833	0.771686	None	None	0.251941
Z98884.1	NA	NA	NA	None	None	NA
UTS2	NA	NA	NA	None	None	NA
TNFRSF9	-1.9468	0.629698	NA	None	None	0.200867
PARK7	0.242844	0.311982	0.563865	None	None	0.505871
AL034417.4	-2.03968	4.28819e-07	2.54887e-05	None	None	6.36773
AL034417.3	-2.09668	4.29824e-05	0.00107184	None	None	4.36671
ERRFI1	-0.899358	0.00298201	0.0285885	None	None	2.52549
AL034417.2	-2.25479	0.00424825	0.0368853	None	None	2.37179
LINC01714	-3.31115	0.00175448	0.0192536	None	None	2.75585
SLC45A1	-4.1608	0.00306311	0.0291044	None	None	2.51384
RERE	0.101552	0.590922	0.793601	None	None	0.22847
RERE-AS1	-0.182191	0.703357	0.861185	None	None	0.152824
AL357552.2	-1.04853	0.797207	NA	None	None	0.0984286
ENO1	-0.562403	0.0173846	0.0978944	None	None	1.75983
ENO1-AS1	NA	NA	NA	None	None	NA
CA6	NA	NA	NA	None	None	NA
SLC2A7	-3.46024	0.381403	NA	None	None	0.418616
SLC2A5	-0.65277	0.510484	0.738534	None	None	0.292018
GPR157	-0.111248	0.684793	0.849386	None	None	0.16444
MIR34AHG	0.205722	0.465747	0.700409	None	None	0.33185
LNCTAM34A	0.0920568	0.789292	0.905937	None	None	0.102762
H6PD	-1.01312	0.0987151	0.290238	None	None	1.00562
SPSB1	1.44414	0.019209	0.104377	None	None	1.7165
LINC02606	NA	NA	NA	None	None	NA
SLC25A33	0.285273	0.207956	0.447534	None	None	0.682029
TMEM201	0.604333	0.444677	0.684674	None	None	0.351955
PIK3CD	0.834891	0.325129	0.576119	None	None	0.487944
PIK3CD-AS2	-0.133694	0.923561	0.970884	None	None	0.0345344
CLSTN1	0.468757	0.0971458	0.287355	None	None	1.01258
CTNNBIP1	-0.234848	0.725687	0.874442	None	None	0.139251
AL357140.1	NA	NA	NA	None	None	NA
AL357140.4	-1.25955	0.289815	0.542046	None	None	0.537879
LZIC	-0.305924	0.190147	0.423382	None	None	0.72091
AL357140.2	NA	NA	NA	None	None	NA
NMNAT1	0.556134	0.0429386	0.175008	None	None	1.36715
RBP7	-1.04853	0.797207	NA	None	None	0.0984286
UBE4B	0.16393	0.503326	0.732535	None	None	0.298151
KIF1B	0.136114	0.591386	0.793813	None	None	0.228129
AL139424.3	-1.93564	0.21963	0.463578	None	None	0.658308
AL139424.2	-4.32879	0.117322	NA	None	None	0.930621
PGD	0.591082	0.121679	0.326465	None	None	0.914784
AL139424.1	NA	NA	NA	None	None	NA
CENPS	-0.397792	0.653164	0.830321	None	None	0.184978
CORT	-3.94752	0.267354	NA	None	None	0.572914
DFFA	0.155113	0.523707	0.746924	None	None	0.280911
AL354956.1	NA	NA	NA	None	None	NA
PEX14	0.297509	0.305168	0.5577	None	None	0.515461
AL139423.2	-3.24131	0.0273116	0.131388	None	None	1.56365
CASZ1	0.158795	0.892018	0.956802	None	None	0.0496266
AL139423.1	NA	NA	NA	None	None	NA
C1orf127	NA	NA	NA	None	None	NA
TARDBP	0.110503	0.608192	0.803464	None	None	0.215959
MASP2	-1.86277	0.184904	0.41662	None	None	0.733054
AL109811.2	-0.333998	0.51198	0.739606	None	None	0.290747
SRM	1.7347	0.000147578	0.00283116	None	None	3.83098
EXOSC10	-0.0974817	0.697131	0.857008	None	None	0.156685
AL109811.1	-0.299412	0.457184	0.69387	None	None	0.339909
EXOSC10-AS1	NA	NA	NA	None	None	NA
MTOR	0.917243	0.00277558	0.0271315	None	None	2.55665
MTOR-AS1	-4.55432	0.168425	0.394086	None	None	0.773593
ANGPTL7	-0.247074	0.918205	0.968024	None	None	0.0370604
UBIAD1	0.358259	0.27952	0.530747	None	None	0.553587
AL031291.1	NA	NA	NA	None	None	NA
DISP3	NA	NA	NA	None	None	NA
LINC01647	NA	NA	NA	None	None	NA
AL031731.1	NA	NA	NA	None	None	NA
FBXO2	NA	NA	NA	None	None	NA
FBXO44	-0.842885	0.565199	0.775922	None	None	0.247799
FBXO6	-1.06672	0.483705	0.715669	None	None	0.315419
MAD2L2	-0.614822	0.804681	0.91354	None	None	0.0943762
DRAXIN	-3.371	0.394156	NA	None	axon guidance	0.404332
AGTRAP	-0.0204337	0.961211	0.986227	None	None	0.0171814
C1orf167	NA	NA	NA	None	None	NA
MTHFR	-0.453383	0.116891	0.317973	None	None	0.932219
CLCN6	0.148507	0.52097	0.745259	None	None	0.283187
NPPA	-0.927884	0.130129	0.339461	None	None	0.885625
NPPB	-3.46918	0.00235677	0.0240303	None	None	2.62768
AL021155.5	-3.27953	0.00241261	0.0244038	None	None	2.61751
KIAA2013	0.177307	0.533862	0.752846	None	None	0.272571
PLOD1	0.326384	0.348182	0.598709	None	None	0.458194
AL096840.2	-4.7543	0.0351886	0.155291	None	None	1.4536
MFN2	-0.114026	0.711531	0.866077	None	None	0.147806
MIIP	-0.919532	0.0045313	0.038531	None	None	2.34378
TNFRSF8	-0.848971	0.295367	0.547964	None	None	0.529638
TNFRSF1B	0.83405	0.0394526	0.16591	None	None	1.40392
VPS13D	0.482169	0.0313228	0.14354	None	None	1.50414
DHRS3	-0.295631	0.701261	0.859772	None	None	0.15412
C1orf158	NA	NA	NA	None	None	NA
PRAMEF18	NA	NA	NA	None	None	NA
LRRC38	NA	NA	NA	None	None	NA
PDPN	NA	NA	NA	None	None	NA
PRDM2	0.0331999	0.853358	0.939829	None	None	0.0688686
KAZN	1.03497	0.000355513	0.00566352	None	None	3.44915
AL357873.1	-1.42882	0.00807359	0.0578522	None	None	2.09293
KAZN-AS1	-1.13699	0.0688308	0.235396	None	None	1.16222
AL031293.1	-3.58244	0.250374	NA	None	None	0.60141
TMEM51-AS1	-4.49975	0.0111561	0.0727296	None	None	1.95249
TMEM51	-0.361151	0.382338	0.629187	None	None	0.417553
C1orf195	-6.33249	0.000249067	0.00427184	None	None	3.60368
FHAD1	-1.06559	0.110392	0.308557	None	None	0.957061
AL031283.2	NA	NA	NA	None	None	NA
AL031283.1	0.875024	0.830203	NA	None	None	0.0808159
EFHD2	-1.26492	0.00826129	0.0588801	None	None	2.08295
CTRC	-4.6374	0.237683	0.48549	None	None	0.624002
CELA2A	-6.00043	0.0298366	0.138967	None	None	1.52525
CELA2B	-3.16223	0.000604151	0.00867193	None	None	3.21885
CASP9	-1.45099	0.00021231	0.00378835	None	None	3.67303
DNAJC16	-0.0999109	0.712863	0.866709	None	None	0.146994
AGMAT	-0.770193	0.147411	0.364885	None	None	0.83147
AL121992.1	-3.84916	0.135058	0.347611	None	None	0.869478
DDI2	-0.370219	0.106701	0.303004	None	None	0.971832
PLEKHM2	-1.06355	3.58614e-06	0.000138791	None	None	5.44537
AL450998.3	-1.69626	0.00881997	0.0618558	None	None	2.05453
SLC25A34	-7.72658	1.57794e-07	1.1397e-05	None	None	6.80191
SLC25A34-AS1	-1.04853	0.797207	NA	None	None	0.0984286
TMEM82	NA	NA	NA	None	None	NA
FBLIM1	0.98249	0.0678883	0.233538	None	None	1.16821
UQCRHL	-1.04853	0.797207	NA	None	None	0.0984286
AL450998.2	-0.617584	0.0327616	0.148298	None	None	1.48464
SPEN	0.264463	0.225829	0.47147	None	None	0.646221
ZBTB17	0.00625736	0.983477	0.993672	None	None	0.00723577
HSPB7	-4.21451	0.208895	NA	None	None	0.680072
CLCNKA	-4.46104	0.0888362	0.272893	None	None	1.05141
EPHA2	-0.366825	0.40802	0.652743	None	None	0.389319
AL451042.2	NA	NA	NA	None	None	NA
AL451042.1	-1.84757	0.648	NA	None	None	0.188425
ARHGEF19	NA	NA	NA	None	None	NA
AL109627.1	NA	NA	NA	None	None	NA
CPLANE2	-3.04768	0.442491	NA	None	None	0.354095
FBXO42	-0.285487	0.150111	0.368547	None	None	0.823587
SZRD1	0.397505	0.0898838	0.274651	None	None	1.04632
SPATA21	-0.436389	0.291626	0.543878	None	None	0.535174
NECAP2	-0.819435	0.00106385	0.0133194	None	None	2.97312
LINC01772	-0.370609	0.572733	0.780975	None	None	0.242048
AL137802.2	-4.53229	0.0522601	0.198705	None	None	1.28183
NBPF1	-0.118697	0.726466	0.874767	None	None	0.138784
AL137798.2	NA	NA	NA	None	None	NA
AL021920.3	NA	NA	NA	None	None	NA
CROCC	0.756805	0.0630196	0.223228	None	None	1.20052
BX284668.2	NA	NA	NA	None	None	NA
BX284668.5	-0.927909	0.56669	0.77644	None	None	0.246655
BX284668.6	-2.53718	0.271937	0.522406	None	None	0.565532
MFAP2	1.96666	0.038226	0.162672	None	None	1.41764
AL049569.1	0.154632	0.554928	0.767809	None	None	0.255763
ATP13A2	0.961002	6.13452e-06	0.000215529	None	None	5.21222
SDHB	0.325232	0.102059	0.295659	None	None	0.991147
PADI2	-1.2275	0.24791	0.497218	None	None	0.605706
PADI1	-3.77605	1.3717e-10	2.63187e-08	None	None	9.86274
PADI3	-1.04853	0.797207	NA	None	None	0.0984286
PADI4	NA	NA	NA	None	None	NA
PADI6	NA	NA	NA	None	None	NA
RCC2	0.616576	0.0424319	0.17366	None	None	1.37231
LINC02810	NA	NA	NA	None	None	NA
LINC01654	NA	NA	NA	None	None	NA
IGSF21	NA	NA	NA	None	None	NA
PAX7	NA	NA	NA	None	None	NA
ALDH4A1	0.931969	0.0670365	0.231398	None	None	1.17369
IFFO2	0.130277	0.73771	0.881024	None	None	0.132114
AL137127.1	0.875024	0.830203	NA	None	None	0.0808159
UBR4	0.591724	0.00124605	0.0149979	None	None	2.90446
EMC1-AS1	-0.20038	0.383533	0.630203	None	None	0.416197
EMC1	0.201561	0.357815	0.607495	None	None	0.446341
MRTO4	0.496816	0.0881798	0.27178	None	None	1.05463
AKR7A3	-5.11756	0.0702764	0.237839	None	None	1.15319
AKR7A2	-0.289078	0.320743	0.571362	None	None	0.493842
SLC66A1	-0.16961	0.617625	0.808559	None	None	0.209275
CAPZB	0.59617	0.000880393	0.0115657	None	None	3.05532
MICOS10	-0.0992015	0.745394	0.885302	None	None	0.127614
AL031727.2	NA	NA	NA	None	None	NA
NBL1	-2.63058	0.230255	0.476246	None	None	0.637791
HTR6	NA	NA	NA	None	None	NA
TMCO4	0.840879	0.0946116	0.282899	None	None	1.02406
OTUD3	0.16569	0.555826	0.7685	None	None	0.255061
PLA2G2D	NA	NA	NA	None	None	NA
PLA2G2F	0.154909	0.906761	0.962491	None	None	0.0425072
Z98257.1	0.954413	0.696479	NA	None	None	0.157092
PLA2G2C	NA	NA	NA	None	None	NA
UBXN10	NA	NA	NA	None	None	NA
CAMK2N1	-1.10393	0.247004	0.496225	None	learning or memory	0.607296
MUL1	-0.276285	0.398703	0.644157	None	None	0.399351
CDA	-0.291229	0.682752	0.848653	None	None	0.165737
PINK1	-0.141383	0.685125	0.849619	None	None	0.16423
PINK1-AS	-0.241757	0.690547	0.853149	None	None	0.160807
DDOST	0.189798	0.456498	0.693713	None	None	0.340561
KIF17	-1.04668	0.0334782	0.150453	None	None	1.47524
SH2D5	-0.98899	0.0329124	0.148713	None	None	1.48264
AL663074.1	-1.04853	0.797207	NA	None	None	0.0984286
HP1BP3	-0.387187	0.0523957	0.198928	None	None	1.2807
EIF4G3	0.873964	4.13541e-05	0.00103551	None	None	4.38348
AL031005.2	NA	NA	NA	None	None	NA
ECE1	-1.48421	8.03417e-05	0.00178058	None	axon guidance	4.09506
AL031005.1	NA	NA	NA	None	None	NA
AL031728.1	-5.56981	0.0339843	0.152124	None	None	1.46872
NBPF3	0.0365643	0.906279	0.962422	None	None	0.0427383
ALPL	2.89797	0.00366618	0.0332487	None	None	2.43579
LINC02596	NA	NA	NA	None	None	NA
RAP1GAP	-0.521764	0.0273133	0.131388	None	None	1.56363
USP48	0.263804	0.179056	0.408213	None	None	0.747011
LDLRAD2	NA	NA	NA	None	None	NA
CELA3B	-1.04853	0.797207	NA	None	None	0.0984286
CELA3A	NA	NA	NA	None	None	NA
LINC01635	NA	NA	NA	None	None	NA
LINC00339	-0.572979	0.379344	0.625876	None	None	0.420967
CDC42	0.182204	0.321018	0.571525	None	None	0.49347
CDC42-AS1	-1.31145	0.0102107	0.0686078	None	None	1.99094
CDC42-IT1	0.758339	0.102175	0.295757	None	None	0.990656
WNT4	-0.887459	0.20279	0.440286	None	None	0.692952
AL445253.1	-5.70237	0.00748679	0.0548618	None	None	2.1257
ZBTB40	0.259348	0.260136	0.509177	None	None	0.5848
EPHB2	-1.78785	0.164056	0.38762	None	learning or memory	0.785008
TEX46	NA	NA	NA	None	None	NA
KDM1A	-0.420839	0.159092	0.38075	None	None	0.798351
AL031428.1	-0.72006	0.0384518	0.163264	None	None	1.41508
LUZP1	0.537061	0.0369222	0.159474	None	None	1.43271
HTR1D	NA	NA	NA	None	None	NA
LINC01355	0.895896	0.00579717	0.0457142	None	None	2.23678
AL109936.6	-0.118512	0.758571	0.89181	None	None	0.120004
HNRNPR	0.683181	0.000130984	0.0025952	None	None	3.88278
ZNF436	0.0655855	0.878036	0.950607	None	None	0.0564877
ZNF436-AS1	-0.413994	0.378218	0.62453	None	None	0.422258
TCEA3	-0.0129453	0.988376	0.995733	None	None	0.00507774
ASAP3	1.0527	0.0296413	0.138634	None	None	1.5281
E2F2	-0.564186	0.466938	0.701452	None	None	0.330741
AL021154.1	NA	NA	NA	None	None	NA
ID3	0.372907	0.480922	0.712715	None	None	0.317925
AL450043.1	-1.23917	0.1269	0.335021	None	None	0.896537
MDS2	-0.9001	0.0891927	0.273602	None	None	1.04967
RPL11	0.098982	0.72692	0.874918	None	None	0.138514
ELOA-AS1	0.156312	0.479228	0.711366	None	None	0.319458
ELOA	0.110179	0.637173	0.82089	None	None	0.195743
PITHD1	-0.256302	0.335229	0.586166	None	None	0.474658
LYPLA2	-0.207387	0.528066	0.749319	None	None	0.277312
GALE	-1.15687	0.000155586	0.00292838	None	None	3.80803
HMGCL	-0.879047	0.0057175	0.0453058	None	None	2.24279
FUCA1	0.0975841	0.796392	0.909348	None	None	0.0988732
CNR2	-5.30105	0.149934	0.36846	None	None	0.8241
PNRC2	0.120421	0.648015	0.826873	None	None	0.188415
SRSF10	0.0376591	0.819934	0.923013	None	None	0.0862213
AL591178.1	0.875024	0.830203	NA	None	None	0.0808159
MYOM3	NA	NA	NA	None	None	NA
IL22RA1	NA	NA	NA	None	None	NA
IFNLR1	-0.53135	0.291836	0.543923	None	None	0.534862
AL138902.1	-1.95818	0.221254	0.465812	None	None	0.655109
GRHL3	-0.278	0.647668	0.826755	None	None	0.188647
STPG1	-0.442047	0.279587	0.530747	None	None	0.553483
NIPAL3	1.05785	0.00202322	0.0214622	None	None	2.69396
RCAN3AS	-0.456576	0.35747	0.607364	None	None	0.44676
RCAN3	0.595376	0.0858126	0.266981	None	None	1.06645
NCMAP-DT	-3.76993	0.309051	NA	None	None	0.50997
NCMAP	0.164896	0.784639	0.903345	None	None	0.10533
SRRM1	-0.417821	0.114095	0.313635	None	None	0.942734
AL445648.1	-2.52321	0.016916	0.0959887	None	None	1.7717
CLIC4	0.850507	3.27784e-05	0.000851347	None	None	4.48441
RUNX3	4.98677	0.107041	0.303494	None	None	0.970451
AL050344.1	NA	NA	NA	None	None	NA
AL031432.1	NA	NA	NA	None	None	NA
SYF2	-0.293795	0.309727	0.561609	None	None	0.509021
AL031432.4	-0.514627	0.407985	0.652743	None	None	0.389356
AL031432.5	NA	NA	NA	None	None	NA
RSRP1	-0.558551	0.0153113	0.0903577	None	None	1.81499
AL031432.3	NA	NA	NA	None	None	NA
RHD	-1.27549	0.0162113	0.0936234	None	None	1.79018
TMEM50A	0.168431	0.392604	0.639099	None	None	0.406045
RHCE	-1.20517	0.0158096	0.0923365	None	None	1.80108
MACO1	0.0737675	0.82044	0.923079	None	None	0.0859529
LDLRAP1	0.00975727	0.969274	0.988709	None	None	0.0135532
AL606491.1	-2.60411	0.398438	NA	None	None	0.399639
MAN1C1	-0.444414	0.240053	0.488126	None	None	0.619692
AL031280.1	-1.16449	0.0151433	0.0898049	None	None	1.81978
SELENON	0.158811	0.596537	0.797011	None	None	0.224363
AL020996.1	-1.64215	0.123777	0.329798	None	None	0.907362
MTFR1L	-0.29842	0.364749	0.613215	None	None	0.438006
AUNIP	0.851745	0.0573445	0.210105	None	None	1.24151
AL033528.2	-0.280744	0.606307	0.801998	None	None	0.217307
PAQR7	-0.107737	0.786859	0.904735	None	None	0.104103
STMN1	-0.549201	0.355116	0.604668	None	None	0.44963
PAFAH2	-0.416416	0.110331	0.308528	None	None	0.957303
EXTL1	-0.938846	0.17511	0.402455	None	None	0.756689
SLC30A2	0.222499	0.458138	0.694854	None	None	0.339003
AL391650.2	-1.42253	0.0294683	0.138044	None	None	1.53065
TRIM63	-5.27731	0.000329439	0.00536122	None	None	3.48222
PDIK1L	-0.258068	0.551505	0.765252	None	None	0.258451
FAM110D	NA	NA	NA	None	None	NA
C1orf232	NA	NA	NA	None	None	NA
AL391650.1	NA	NA	NA	None	None	NA
ZNF593	0.395634	0.315683	0.567555	None	None	0.500749
CNKSR1	0.0646676	0.794334	0.908683	None	None	0.0999968
CATSPER4	-1.04853	0.797207	NA	None	cilium or flagellum-dependent cell motility	0.0984286
CEP85	-1.00356	0.00108752	0.0135131	None	None	2.96356
SH3BGRL3	-1.89726	8.15163e-07	4.22848e-05	None	None	6.08876
UBXN11	0.306879	0.478655	0.710869	None	None	0.319978
CD52	-0.157722	0.692201	0.854037	None	None	0.159768
CRYBG2	0.630999	0.0737204	0.244463	None	None	1.13241
ZNF683	NA	NA	NA	None	None	NA
LIN28A	NA	NA	NA	None	None	NA
DHDDS	0.490351	0.020181	0.108115	None	None	1.69506
AL513365.2	-0.408566	0.240065	0.488126	None	None	0.619671
HMGN2	0.453435	0.0493562	0.19156	None	None	1.30666
RPS6KA1	0.923575	0.0604952	0.217732	None	None	1.21828
AL512408.1	NA	NA	NA	None	None	NA
ARID1A	0.853473	0.000664014	0.00928135	None	None	3.17782
PIGV	-0.766435	0.127404	0.335714	None	None	0.894818
ZDHHC18	0.189972	0.577502	0.783884	None	None	0.238446
SFN	-1.48342	0.000986259	0.0125915	None	None	3.00601
GPN2	0.435798	0.118116	0.319708	None	None	0.92769
GPATCH3	-0.573419	0.11398	0.313499	None	None	0.943173
NUDC	0.0915771	0.657146	0.832697	None	None	0.182338
KDF1	-0.537194	0.28892	0.541026	None	None	0.539222
TRNP1	-4.62347	0.048048	0.188787	None	None	1.31833
TENT5B	-0.231646	0.597992	0.797902	None	None	0.223305
SLC9A1	0.669996	0.000455613	0.00693519	None	None	3.3414
WDTC1	0.147232	0.656529	0.832382	None	None	0.182746
TMEM222	0.00743164	0.979257	0.992441	None	None	0.00910318
SYTL1	-1.44411	0.0041215	0.0361599	None	None	2.38495
MAP3K6	-5.46521	0.000913981	0.011862	None	None	3.03906
FCN3	NA	NA	NA	None	None	NA
CD164L2	NA	NA	NA	None	None	NA
GPR3	NA	NA	NA	None	None	NA
WASF2	-0.559688	0.00183642	0.0199596	None	None	2.73603
FO393419.2	-1.41763	0.0116871	0.0752936	None	None	1.93229
BX293535.1	-4.54083	0.0713202	0.23981	None	None	1.14679
AHDC1	-1.37157	5.36078e-08	4.3565e-06	None	None	7.27077
FGR	NA	NA	NA	None	None	NA
LINC02574	NA	NA	NA	None	None	NA
IFI6	0.510771	0.00345466	0.031905	None	None	2.46159
AL445490.1	-0.450598	0.589611	0.792487	None	None	0.229434
AL020997.5	-4.87897	0.105079	0.300563	None	None	0.978486
FAM76A	-0.36932	0.258065	0.506783	None	None	0.58827
STX12	0.701505	0.000298517	0.00492432	None	None	3.52503
AL020997.2	-0.638791	0.747807	0.886715	None	None	0.126211
AL020997.3	NA	NA	NA	None	None	NA
AL020997.4	-5.70705	0.00644885	0.0493397	None	None	2.19052
PPP1R8	0.326139	0.258088	0.506783	None	None	0.588232
THEMIS2	-2.36832	0.345778	0.596574	None	None	0.461203
RPA2	0.105241	0.729922	0.87663	None	None	0.136724
SMPDL3B	1.64229	0.168058	0.393706	None	None	0.77454
AL512288.1	0.660322	0.752704	0.888847	None	None	0.123376
XKR8	0.36531	0.453905	0.692283	None	None	0.343035
EYA3	0.772747	0.00297983	0.0285827	None	None	2.52581
PTAFR	0.396751	0.589421	0.792349	None	None	0.229574
DNAJC8	-0.267189	0.148804	0.366609	None	None	0.827385
ATP5IF1	-0.134702	0.571424	0.780189	None	None	0.243041
AL353622.1	-0.544911	0.349581	0.59992	None	None	0.456452
AL353622.2	NA	NA	NA	None	None	NA
SESN2	0.33085	0.23169	0.478056	None	None	0.635093
MED18	-0.496639	0.252746	0.500997	None	None	0.597316
PHACTR4	0.100124	0.763254	0.893808	None	None	0.117331
RCC1	1.26899	7.25418e-05	0.00164595	None	None	4.13941
SNHG3	0.860345	0.00483637	0.0401877	None	None	2.31548
TRNAU1AP	-0.46006	0.0623297	0.221477	None	None	1.2053
SNHG12	0.182981	0.546219	0.76184	None	None	0.262633
TAF12	0.171773	0.442855	0.683088	None	None	0.353739
RAB42	NA	NA	NA	None	None	NA
LINC01715	0.449434	0.726346	0.874767	None	None	0.138857
AL360012.1	-6.65325	2.41362e-05	0.000661974	None	None	4.61733
GMEB1	0.565498	0.043925	0.177968	None	None	1.35729
YTHDF2	0.317014	0.165881	0.390248	None	None	0.780204
OPRD1	1.61707	0.684716	NA	None	None	0.16449
EPB41	1.21742	0.00231174	0.0236509	None	None	2.63606
TMEM200B	-1.04853	0.797207	NA	None	None	0.0984286
AL357500.1	-4.49651	0.158065	0.379445	None	None	0.801164
SRSF4	0.289851	0.0884629	0.27219	None	None	1.05324
MECR	0.724042	0.0752792	0.247504	None	None	1.12333
PTPRU	-0.19343	0.606055	0.801979	None	None	0.217488
LINC01756	-5.27818	0.0221481	0.115071	None	None	1.65466
MATN1	-3.59525	0.104872	0.30021	None	extracellular matrix organization	0.979339
MATN1-AS1	-4.04216	0.0127573	0.0799528	None	None	1.89424
SDC3	2.80504	3.36474e-06	0.000132607	None	None	5.47305
PUM1	0.779758	1.43256e-05	0.00043722	None	None	4.84389
NKAIN1	-0.0413944	0.983584	0.993725	None	None	0.00718838
SNRNP40	0.291103	0.239566	0.487852	None	None	0.620575
ZCCHC17	0.330319	0.294346	0.546742	None	None	0.531142
AL451070.1	-0.550018	0.111289	0.310062	None	None	0.953547
FABP3	-1.30693	0.303535	0.556301	None	None	0.517791
SERINC2	0.332591	0.430338	0.672493	None	None	0.366191
LINC01226	1.23513	0.0297755	0.138921	None	None	1.52614
AC114488.1	1.51836	0.502423	0.732037	None	None	0.298931
TINAGL1	0.765299	0.0610023	0.218987	None	None	1.21465
HCRTR1	-1.31581	0.418055	0.661379	None	None	0.378767
PEF1	-0.0449831	0.898504	0.959346	None	None	0.04648
AC114488.2	NA	NA	NA	None	None	NA
AC114488.3	NA	NA	NA	None	None	NA
COL16A1	-3.88554	0.122036	0.326937	None	extracellular matrix organization	0.913514
ADGRB2	-2.03653	0.414176	0.65836	None	None	0.382815
SPOCD1	-6.03716	0.000752823	0.0103003	None	None	3.12331
AL354919.1	NA	NA	NA	None	None	NA
AL136115.2	0.921947	0.0809289	0.25803	None	None	1.0919
PTP4A2	0.577681	0.000832378	0.0110876	None	None	3.07968
AL136115.1	-4.49651	0.158065	0.379445	None	None	0.801164
AL136115.3	NA	NA	NA	None	None	NA
KHDRBS1	-0.0407931	0.801057	0.911721	None	None	0.0963367
AL445248.1	-0.915941	0.0188525	0.103023	None	None	1.72463
TMEM39B	0.289408	0.287424	0.5393	None	None	0.541476
KPNA6	0.723369	0.00175234	0.0192418	None	None	2.75638
AL049795.2	NA	NA	NA	None	None	NA
TXLNA	0.14254	0.538822	0.756177	None	None	0.268555
CCDC28B	-0.266691	0.745107	0.885192	None	None	0.127782
AL049795.1	NA	NA	NA	None	None	NA
IQCC	-5.9178	0.000109419	0.00227746	None	None	3.96091
DCDC2B	-1.03932	0.270944	0.521493	None	None	0.567121
TMEM234	-0.508575	0.210112	0.450742	None	None	0.677549
EIF3I	-0.0965364	0.771482	0.898106	None	None	0.112674
FAM167B	NA	NA	NA	None	None	NA
LCK	NA	NA	NA	None	None	NA
HDAC1	-0.255045	0.294341	0.546742	None	None	0.53115
MARCKSL1	-2.71785	0.0032885	0.0306515	None	None	2.483
TSSK3	-2.53308	0.0437081	0.177268	None	None	1.35944
FAM229A	0.575932	0.314975	0.566936	None	None	0.501724
BSDC1	0.275983	0.169525	0.395232	None	None	0.770765
ZBTB8B	0.397761	0.758117	0.891676	None	None	0.120264
ZBTB8A	-0.643778	0.0380875	0.162498	None	None	1.41922
ZBTB8OS	0.463194	0.0490609	0.191028	None	None	1.30926
RBBP4	0.14368	0.481196	0.712945	None	None	0.317678
SYNC	-0.559296	0.0443178	0.179059	None	None	1.35342
AC114489.1	-1.04853	0.797207	NA	None	None	0.0984286
KIAA1522	-0.95872	0.0873298	0.270402	None	None	1.05884
YARS	1.57968	1.59551e-11	3.66139e-09	None	None	10.7971
S100PBP	-0.140529	0.65873	0.833002	None	None	0.181292
FNDC5	-4.65523	0.0440734	0.178429	None	None	1.35582
HPCA	NA	NA	NA	None	None	NA
TMEM54	1.17017	0.00412282	0.0361599	None	None	2.38481
AL031602.2	-0.73524	0.248376	0.497306	None	None	0.60489
RNF19B	0.0542943	0.858784	0.941998	None	None	0.0661162
AL020995.1	0.747131	0.0542579	0.203316	None	None	1.26554
AK2	1.0288	0.000231766	0.0040362	None	None	3.63495
AZIN2	-0.160914	0.792221	0.907565	None	None	0.101154
TRIM62	1.22504	0.000126613	0.00254193	None	None	3.89752
AL662907.3	NA	NA	NA	None	None	NA
ZNF362	-0.152784	0.758226	0.891676	None	None	0.120201
AL513327.3	NA	NA	NA	None	None	NA
A3GALT2	-2.59791	0.515049	NA	None	None	0.288152
AL513327.1	-0.319454	0.207701	0.447365	None	None	0.682561
PHC2	0.531442	0.00655186	0.0500121	None	None	2.18364
AL513327.2	0.298474	0.34083	0.591923	None	None	0.467463
ZSCAN20	-0.182845	0.683407	0.848805	None	None	0.16532
CSMD2	NA	NA	NA	None	None	NA
C1orf94	NA	NA	NA	None	None	NA
SMIM12	-0.602714	0.0739059	0.244874	None	None	1.13132
GJB4	-3.66068	0.346128	NA	None	None	0.460763
GJB3	-4.01931	0.267656	NA	None	None	0.572424
DLGAP3	NA	NA	NA	None	None	NA
TMEM35B	-0.813245	0.468472	0.702448	None	None	0.329317
ZMYM6	-0.705844	0.0707756	0.23867	None	None	1.15012
ZMYM1	-0.103479	0.668575	0.83926	None	None	0.17485
AL590434.1	NA	NA	NA	None	None	NA
SFPQ	0.33895	0.0617815	0.220328	None	None	1.20914
ZMYM4	0.554509	0.0476012	0.187872	None	None	1.32238
ZMYM4-AS1	-0.388909	0.211508	0.452439	None	None	0.674674
KIAA0319L	0.182715	0.607148	0.802714	None	None	0.216705
NCDN	0.125052	0.816728	0.92062	None	None	0.0879224
AC004865.2	-5.4618	0.0127588	0.0799528	None	None	1.89419
TFAP2E	-1.25439	0.0155264	0.0913	None	None	1.80893
PSMB2	0.097653	0.697578	0.857441	None	None	0.156407
C1orf216	-1.23981	0.590644	0.793405	None	None	0.228674
CLSPN	0.158303	0.723592	0.872845	None	None	0.140507
AL354864.1	NA	NA	NA	None	None	NA
AGO4	0.316559	0.363405	0.611943	None	None	0.439609
AGO1	0.636583	0.649802	0.827975	None	None	0.187219
AL139286.3	-0.66052	0.601142	0.799626	None	None	0.221023
AL139286.2	NA	NA	NA	None	None	NA
AGO3	1.02905	0.000201997	0.00364016	None	None	3.69466
AL138787.2	0.0530328	0.904617	0.961712	None	None	0.0435353
ADPRHL2	-0.423898	0.103505	0.297853	None	None	0.985037
COL8A2	-3.92726	0.11962	0.322658	None	extracellular matrix organization	0.922198
TRAPPC3	0.196192	0.429852	0.672026	None	None	0.366681
MAP7D1	0.866738	0.00165836	0.0184784	None	None	2.78032
THRAP3	0.30368	0.155115	0.375195	None	None	0.809346
SH3D21	-0.470296	0.126002	0.333279	None	None	0.899621
EVA1B	2.1277	7.40696e-10	1.1268e-07	None	None	9.13036
AL591845.1	-0.644892	0.263514	0.51302	None	None	0.579196
STK40	0.8242	7.67791e-06	0.000260173	None	None	5.11476
LSM10	0.74956	0.0832348	0.262318	None	None	1.07969
OSCP1	0.739918	0.0230347	0.118183	None	None	1.63762
MRPS15	0.592796	0.0671324	0.231641	None	None	1.17307
CSF3R	0.784394	0.0202767	0.1085	None	None	1.693
AL353604.1	NA	NA	NA	None	None	NA
LINC01137	0.329967	0.519069	0.744095	None	None	0.284775
ZC3H12A	0.306607	0.399999	0.645205	None	None	0.397941
MEAF6	0.143078	0.611773	0.804974	None	None	0.21341
SNIP1	-0.352807	0.184806	0.416503	None	None	0.733284
DNALI1	-1.60698	0.493097	0.723624	None	None	0.307068
GNL2	0.670463	0.0249437	0.124643	None	None	1.60304
RSPO1	NA	NA	NA	None	None	NA
C1orf109	0.142127	0.713214	0.86702	None	None	0.14678
CDCA8	-0.393608	0.547328	0.762332	None	None	0.261752
EPHA10	-2.03491	0.552014	NA	None	axon guidance	0.25805
MANEAL	-4.49285	0.0591786	0.214441	None	None	1.22784
YRDC	0.590382	0.101928	0.295324	None	None	0.991709
C1orf122	0.274833	0.262261	0.511665	None	None	0.581266
MTF1	0.778225	0.000252154	0.00430848	None	None	3.59833
AL929472.2	NA	NA	NA	None	None	NA
INPP5B	0.236671	0.449095	0.688395	None	None	0.347662
SF3A3	-0.0394256	0.880267	0.951643	None	None	0.0553857
FHL3	-0.132917	0.859848	0.941998	None	None	0.0655782
UTP11	0.375823	0.167484	0.392746	None	None	0.776027
POU3F1	-1.04853	0.797207	NA	None	None	0.0984286
MIR3659HG	-3.04642	0.21858	NA	None	None	0.66039
LINC01685	NA	NA	NA	None	None	NA
AL354702.2	0.875024	0.830203	NA	None	None	0.0808159
RRAGC	-0.304853	0.206639	0.446011	None	None	0.684787
AL139260.1	-1.09066	1.48064e-09	2.06481e-07	None	None	8.82955
MYCBP	-0.815813	0.00230447	0.0236143	None	None	2.63743
GJA9	-1.90046	6.85228e-07	3.63231e-05	None	None	6.16416
RHBDL2	-1.73757	1.57109e-09	2.14152e-07	None	None	8.8038
AKIRIN1	0.4133	0.0817603	0.259585	None	None	1.08746
NDUFS5	0.0244702	0.951331	0.981878	None	None	0.0216683
MACF1	0.394114	0.0722602	0.241323	None	None	1.1411
AL356055.1	NA	NA	NA	None	None	NA
AL442071.2	-0.373988	0.374469	0.621112	None	None	0.426584
AL442071.1	-0.398032	0.434152	0.675542	None	None	0.362358
BMP8A	-0.916307	0.109238	0.306701	None	None	0.961628
PABPC4	1.30092	1.79434e-05	0.000518812	None	None	4.7461
PABPC4-AS1	-0.341374	0.547278	0.76232	None	None	0.261792
HEYL	NA	NA	NA	None	None	NA
NT5C1A	NA	NA	NA	None	None	NA
HPCAL4	NA	NA	NA	None	None	NA
PPIE	-0.569612	0.304881	0.557465	None	None	0.51587
BMP8B	-4.47813	0.164112	0.38762	None	None	0.784861
OXCT2	NA	NA	NA	None	None	NA
AL033527.4	NA	NA	NA	None	None	NA
LINC02811	NA	NA	NA	None	None	NA
TRIT1	0.0969241	0.794268	0.908683	None	None	0.100033
MYCL	0.0468059	0.968045	0.988674	None	None	0.0141044
MFSD2A	0.883307	0.162236	0.385022	None	None	0.789852
CAP1	0.432869	0.0257728	0.126759	None	None	1.58884
PPT1	-0.437541	0.115119	0.315624	None	None	0.938854
RLF	-0.643099	0.000416034	0.00645191	None	None	3.38087
TMCO2	-2.99825	0.45017	NA	None	None	0.346623
AL050341.2	0.0255892	0.966668	0.988292	None	None	0.0147227
ZMPSTE24	1.18131	1.01966e-06	5.0199e-05	None	None	5.99154
COL9A2	0.461568	0.848715	0.937164	None	None	0.0712381
SMAP2	0.139944	0.760829	0.892755	None	None	0.118713
AL031985.4	-4.40665	0.086952	NA	None	None	1.06072
ZFP69B	NA	NA	NA	None	None	NA
AL031985.3	NA	NA	NA	None	None	NA
ZFP69	-1.59833	0.34255	0.593679	None	None	0.465276
AL603839.3	-0.995836	0.159609	0.381784	None	None	0.796944
EXO5	-1.65201	0.134061	0.346307	None	None	0.872699
ZNF684	-0.925705	0.246957	0.496186	None	None	0.607379
AL356379.2	NA	NA	NA	None	None	NA
RIMS3	-1.46619	0.714027	NA	None	None	0.146285
AL031289.1	-2.99825	0.45017	NA	None	None	0.346623
NFYC-AS1	-0.42816	0.354713	0.604321	None	None	0.450123
NFYC	0.72565	0.0112034	0.0729027	None	None	1.95065
KCNQ4	1.70268	0.571096	NA	None	None	0.243291
CITED4	-1.61777	0.0668751	0.231022	None	None	1.17474
AC119677.1	-1.04853	0.797207	NA	None	None	0.0984286
CTPS1	1.04862	0.0222222	0.115237	None	None	1.65321
SLFNL1-AS1	0.875619	0.346783	0.597494	None	None	0.459942
SLFNL1	0.932406	0.284457	0.536564	None	None	0.545984
SCMH1	-0.0698063	0.891573	0.956638	None	None	0.049843
AC093151.8	-0.0867571	0.983037	NA	None	None	0.00743012
FOXO6	0.395497	0.307502	0.559765	None	None	0.512153
AC093151.2	-3.49676	0.376122	NA	None	None	0.424671
HIVEP3	0.429644	0.330763	0.582401	None	None	0.480483
AL158216.1	NA	NA	NA	None	None	NA
GUCA2A	NA	NA	NA	None	None	NA
FOXJ3	-0.586669	0.000885133	0.0116111	None	None	3.05299
AC096540.1	NA	NA	NA	None	None	NA
RIMKLA	-3.42891	7.61734e-09	8.26914e-07	None	None	8.1182
ZMYND12	-4.44042	0.187454	NA	None	None	0.727106
PPCS	-0.561027	0.016214	0.0936234	None	None	1.79011
CCDC30	0.377026	0.160603	0.382616	None	None	0.794247
PPIH	-0.132938	0.671714	0.841045	None	None	0.172816
AC098484.4	-0.651614	0.0997972	0.291763	None	None	1.00088
AC098484.2	NA	NA	NA	None	None	NA
YBX1	-0.120783	0.694749	0.855411	None	None	0.158172
CLDN19	-2.60411	0.398438	NA	None	None	0.399639
P3H1	-1.3924	0.000863363	0.0113832	None	None	3.06381
C1orf50	-0.266498	0.295981	0.54871	None	None	0.528736
AC098484.1	NA	NA	NA	None	None	NA
TMEM269	-0.714463	0.100156	0.292416	None	None	0.999322
SVBP	-0.373562	0.341567	0.592618	None	None	0.466524
ERMAP	-0.21459	0.542037	0.758693	None	None	0.265971
AL512353.1	-1.59692	0.0245796	0.123607	None	None	1.60943
ZNF691	-0.260374	0.623337	0.812552	None	None	0.205277
SLC2A1	-0.251761	0.470204	0.703849	None	None	0.327714
SLC2A1-AS1	-1.12794	0.00740306	0.0544684	None	None	2.13059
AC099795.1	-2.25426	0.0273821	0.131632	None	None	1.56253
FAM183A	-0.0633784	0.903176	0.961517	None	None	0.0442277
EBNA1BP2	0.163447	0.553673	0.766905	None	None	0.256746
CFAP57	-0.566315	0.317658	0.569083	None	None	0.49804
TMEM125	-0.602069	0.303969	0.556726	None	None	0.51717
C1orf210	0.0279928	0.983154	0.993507	None	None	0.00737867
TIE1	-2.89476	0.466489	NA	None	extracellular matrix organization	0.331159
MPL	NA	NA	NA	None	None	NA
AL139289.3	NA	NA	NA	None	None	NA
AL139289.2	0.160405	0.776487	0.899887	None	None	0.109866
CDC20	-0.687751	0.175222	0.402662	None	None	0.756411
ELOVL1	0.0883733	0.792693	0.908028	None	None	0.100895
MED8	-0.357562	0.210801	0.451353	None	None	0.676128
AL139289.1	-4.29485	0.274812	NA	None	None	0.560965
SZT2	0.304128	0.173283	0.400444	None	None	0.761245
HYI	-0.95268	0.431896	0.673825	None	None	0.364621
HYI-AS1	NA	NA	NA	None	None	NA
PTPRF	0.31977	0.180776	0.410689	None	None	0.742858
KDM4A	0.408392	0.189565	0.4225	None	None	0.722243
KDM4A-AS1	0.0360022	0.91735	0.967603	None	None	0.037465
ST3GAL3	0.844437	0.124552	0.331181	None	None	0.904651
AL451062.1	-0.650248	0.430907	0.672919	None	None	0.365616
ARTN	NA	NA	NA	None	None	NA
AL357079.1	-3.65837	0.117041	0.318103	None	None	0.93166
IPO13	1.00605	0.290154	0.542569	None	None	0.537371
DPH2	1.64352	0.0695465	0.2367	None	None	1.15772
ATP6V0B	0.763201	0.0188256	0.102984	None	None	1.72525
B4GALT2	-0.0373326	0.953682	0.982597	None	None	0.0205963
CCDC24	-0.338039	0.632169	0.817998	None	None	0.199167
AL139220.2	-2.45705	0.0826164	0.261253	None	None	1.08293
DMAP1	-0.686376	0.206019	0.445165	None	None	0.686094
ERI3	0.63218	0.0881749	0.27178	None	None	1.05466
RNF220	-1.07612	0.0289835	0.136443	None	None	1.53785
TMEM53	-0.379941	0.430447	0.672508	None	None	0.366081
ARMH1	-0.123386	0.806091	0.91419	None	None	0.0936162
KIF2C	-0.679904	0.267231	0.517202	None	None	0.573113
AL592166.1	-0.911466	0.116466	0.317407	None	None	0.9338
RPS8	-0.0789063	0.751831	0.888475	None	None	0.12388
BEST4	-1.04853	0.797207	NA	None	None	0.0984286
PLK3	0.272464	0.314818	0.566838	None	None	0.50194
TCTEX1D4	-4.93597	0.00289605	0.0280312	None	None	2.53819
BTBD19	0.559075	0.0382166	0.162672	None	None	1.41775
PTCH2	-1.17049	0.0152651	0.0902005	None	None	1.8163
EIF2B3	0.671553	0.0668497	0.231022	None	None	1.1749
HECTD3	-1.06731	0.0096825	0.0660399	None	None	2.01401
UROD	-1.24335	0.0155694	0.0913479	None	None	1.80773
ZSWIM5	0.872427	0.0396284	0.166148	None	None	1.40199
LINC01144	NA	NA	NA	None	None	NA
HPDL	2.49491	0.0139786	0.0851241	None	None	1.85454
MUTYH	-0.461514	0.116522	0.317407	None	None	0.933593
TOE1	-0.395871	0.326427	0.577515	None	None	0.486214
TESK2	-0.578969	0.0811583	0.258529	None	None	1.09067
CCDC163	-5.97667	0.0173254	0.0976664	None	None	1.76132
MMACHC	0.032267	0.95518	0.983325	None	None	0.0199147
PRDX1	0.16213	0.484148	0.716149	None	None	0.315021
AKR1A1	0.112425	0.717107	0.86971	None	None	0.144416
NASP	0.191003	0.278187	0.529602	None	None	0.555663
CCDC17	-0.187397	0.911482	0.964572	None	None	0.0402519
GPBP1L1	0.164976	0.4237	0.666545	None	None	0.372941
TMEM69	0.34469	0.31841	0.569669	None	None	0.497013
IPP	0.276319	0.455404	0.693026	None	None	0.341603
AL604028.1	NA	NA	NA	None	None	NA
MAST2	1.51495	3.47079e-06	0.000135608	None	None	5.45957
PIK3R3	0.314406	0.42108	0.664523	None	None	0.375636
AL358075.1	NA	NA	NA	None	None	NA
AL358075.2	NA	NA	NA	None	None	NA
TSPAN1	-5.04139	0.0786591	0.253878	None	None	1.10425
P3R3URF	NA	NA	NA	None	None	NA
POMGNT1	-0.115763	0.697791	0.857634	None	None	0.156275
LURAP1	0.253354	0.536233	0.754375	None	None	0.270646
RAD54L	0.459015	0.46578	0.700409	None	None	0.331819
LRRC41	0.265337	0.369693	0.617147	None	None	0.432159
UQCRH	0.401558	0.150252	0.368746	None	None	0.823179
NSUN4	0.474565	0.0969561	0.287068	None	None	1.01342
FAAH	0.16703	0.677828	0.845082	None	None	0.168881
DMBX1	NA	NA	NA	None	None	NA
MKNK1-AS1	-0.0775226	0.87103	0.947663	None	None	0.0599669
MKNK1	0.730415	0.0175746	0.0984581	None	None	1.75511
MOB3C	-0.0867571	0.983037	NA	None	None	0.00743012
ATPAF1	0.128672	0.683675	0.848835	None	None	0.165151
TEX38	-3.66173	0.158048	0.379445	None	None	0.80121
EFCAB14-AS1	-0.110813	0.773691	0.898599	None	None	0.111433
EFCAB14	0.504696	0.0158303	0.092377	None	None	1.80051
CYP4B1	-2.60412	0.398681	NA	None	None	0.399375
CYP4Z1	NA	NA	NA	None	None	NA
CYP4A22-AS1	NA	NA	NA	None	None	NA
STIL	0.280987	0.495266	0.725373	None	None	0.305162
CMPK1	0.386585	0.0582765	0.212403	None	None	1.23451
LINC01389	-0.177519	0.779747	0.90167	None	None	0.108046
TRABD2B	NA	NA	NA	None	None	NA
LINC02794	NA	NA	NA	None	None	NA
AL109659.1	NA	NA	NA	None	None	NA
SLC5A9	NA	NA	NA	None	None	NA
SPATA6	-0.227817	0.875205	0.949412	None	None	0.0578903
AGBL4	0.991946	0.246721	0.495932	None	None	0.607793
AL645507.1	NA	NA	NA	None	None	NA
AC099788.1	-0.116671	0.96399	0.986982	None	None	0.0159273
AL590432.1	NA	NA	NA	None	None	NA
ELAVL4	NA	NA	NA	None	None	NA
DMRTA2	NA	NA	NA	None	None	NA
FAF1	0.132178	0.672653	0.841383	None	None	0.172209
AL049637.1	-1.41532	0.014397	0.0870314	None	None	1.84173
CDKN2C	-3.8987	0.0914886	0.276964	None	None	1.03863
C1orf185	NA	NA	NA	None	None	NA
LINC01562	-0.419822	0.735788	0.880078	None	None	0.133247
RNF11	0.657693	0.00110327	0.0136713	None	None	2.95732
AL162430.2	-0.269231	0.620058	0.810251	None	None	0.207568
TTC39A	0.470417	0.218539	0.461758	None	None	0.660472
TTC39A-AS1	0.255706	0.736184	0.880286	None	None	0.133013
EPS15	1.04701	0.000158509	0.0029686	None	None	3.79995
AC104170.2	-3.74732	0.148474	0.366165	None	None	0.82835
AC104170.1	-0.206499	0.857643	0.941607	None	None	0.0666932
OSBPL9	0.145366	0.517691	0.743243	None	None	0.285929
NRDC	0.310179	0.0957272	0.284645	None	None	1.01896
AL050343.2	-5.01604	0.0815045	0.259045	None	None	1.08882
AL050343.3	NA	NA	NA	None	None	NA
RAB3B	1.33964	0.000456844	0.00694227	None	None	3.34023
TXNDC12	0.554257	0.0249908	0.124775	None	None	1.60222
KTI12	-0.758025	0.0775297	0.252114	None	None	1.11053
AL445685.1	-0.818596	0.191227	0.424847	None	None	0.718451
TXNDC12-AS1	-3.85805	0.327728	NA	None	None	0.484486
BTF3L4	0.306862	0.168705	0.394589	None	None	0.772872
ZFYVE9	0.312705	0.44337	0.683433	None	None	0.353234
CC2D1B	-0.355771	0.227178	0.472795	None	None	0.643633
AL513218.1	NA	NA	NA	None	None	NA
AL513218.2	-0.757338	0.295507	0.548112	None	None	0.529432
ORC1	0.543101	0.399642	0.644785	None	None	0.398329
PRPF38A	-0.649337	0.00357193	0.0326553	None	None	2.4471
TUT4	-0.615292	0.0387447	0.163998	None	None	1.41179
GPX7	-2.12998	0.245546	0.494502	None	None	0.609867
SHISAL2A	0.119364	0.973901	NA	None	None	0.011485
COA7	0.375047	0.250941	0.499852	None	None	0.600428
ZYG11B	0.212134	0.449407	0.688437	None	None	0.34736
ZYG11A	0.91391	0.022169	0.115071	None	None	1.65425
ECHDC2	-0.203605	0.539734	0.756721	None	None	0.26782
SCP2	-0.00308669	0.993334	0.997588	None	None	0.00290489
PODN	NA	NA	NA	None	None	NA
CPT2	-0.440999	0.339339	0.590561	None	None	0.469366
AL606760.2	-1.03975	0.576516	0.783366	None	None	0.239188
CZIB	-0.339966	0.371728	0.61866	None	None	0.429774
AL606760.3	-5.21221	0.00619758	0.047913	None	None	2.20778
MAGOH	0.264882	0.293927	0.546356	None	None	0.53176
AL606760.1	1.13683	0.079578	0.255702	None	None	1.09921
LRP8	3.23724	1.56653e-15	8.87489e-13	None	None	14.8051
AL355483.3	NA	NA	NA	None	None	NA
AL355483.1	NA	NA	NA	None	None	NA
AL355483.2	NA	NA	NA	None	None	NA
LINC01771	6.89733	0.00191551	0.0206091	None	None	2.71772
AC119428.2	NA	NA	NA	None	None	NA
LINC02812	NA	NA	NA	None	None	NA
DMRTB1	NA	NA	NA	None	None	NA
GLIS1	1.39629	0.702775	NA	None	None	0.153184
NDC1	0.710787	0.0102037	0.0686078	None	None	1.99124
YIPF1	0.453296	0.0705923	0.238496	None	None	1.15124
DIO1	-0.90356	0.0371493	0.160019	None	None	1.43005
HSPB11	-0.449384	0.101836	0.295154	None	None	0.992098
LRRC42	0.11081	0.717224	0.869738	None	None	0.144345
LDLRAD1	-1.04853	0.797207	NA	None	None	0.0984286
TMEM59	-0.130734	0.482817	0.71453	None	None	0.316218
TCEANC2	-0.0143291	0.968846	0.988709	None	None	0.0137451
CYB5RL	0.0383101	0.958523	0.984921	None	None	0.0183977
MRPL37	0.0663689	0.859803	0.941998	None	None	0.0656011
SSBP3	0.0331037	0.917379	0.967603	None	None	0.0374511
SSBP3-AS1	NA	NA	NA	None	None	NA
AL161644.1	NA	NA	NA	None	None	NA
AL035415.1	NA	NA	NA	None	None	NA
AC099796.2	-5.08133	0.0752138	0.247374	None	None	1.1237
ACOT11	-2.44174	3.30793e-09	4.13582e-07	None	None	8.48044
FAM151A	-7.69492	6.62129e-07	3.52016e-05	None	None	6.17906
AL590093.1	NA	NA	NA	None	None	NA
MROH7	-1.90408	0.284298	0.536343	None	None	0.546226
TTC4	-0.537026	0.149468	0.367868	None	None	0.82545
PARS2	-0.443797	0.554921	0.767809	None	None	0.255769
TTC22	NA	NA	NA	None	None	NA
LEXM	NA	NA	NA	None	None	NA
DHCR24	0.353371	0.376771	0.62356	None	None	0.423923
AC096536.3	-0.340545	0.611257	0.804816	None	None	0.213776
DHCR24-DT	NA	NA	NA	None	None	NA
AL590440.2	NA	NA	NA	None	None	NA
PCSK9	NA	NA	NA	None	None	NA
USP24	0.639347	0.103351	0.297774	None	None	0.985686
MIR4422HG	-3.42288	0.38671	NA	None	None	0.412615
AL603840.1	-1.96654	0.147168	0.364433	None	None	0.832185
LINC01753	0.875024	0.830203	NA	None	None	0.0808159
AL353681.1	-1.66864	0.675707	NA	None	None	0.170241
AC119674.1	1.21672	0.000267853	0.00450239	None	None	3.5721
LINC01767	NA	NA	NA	None	None	NA
PLPP3	1.27673	1.55081e-06	7.01115e-05	None	None	5.80944
PRKAA2	-0.566417	0.31551	0.567552	None	None	0.500987
FYB2	0.509308	0.843472	NA	None	None	0.0739292
C8A	NA	NA	NA	None	None	NA
AL445193.2	NA	NA	NA	None	None	NA
OMA1	-0.430451	0.397843	0.643535	None	None	0.400288
AL035411.3	NA	NA	NA	None	None	NA
TACSTD2	-0.511114	0.0639772	0.225296	None	None	1.19397
MYSM1	0.0185142	0.926207	0.971714	None	None	0.0332918
AL136985.3	NA	NA	NA	None	None	NA
JUN	-1.97463	7.07977e-13	2.37684e-10	None	None	12.15
LINC01135	-1.69802	0.00414476	0.0362821	None	None	2.3825
AL136985.1	NA	NA	NA	None	None	NA
LINC02777	NA	NA	NA	None	None	NA
LINC01358	-4.45947	0.172734	0.400089	None	None	0.762622
AC093425.1	-4.03209	0.265096	NA	None	None	0.576597
FGGY	-1.77526	0.00387147	0.0345063	None	None	2.41212
AL035416.1	-3.88115	0.188872	NA	None	None	0.723831
HOOK1	-0.0120317	0.971455	0.98964	None	None	0.0125772
CYP2J2	-1.92167	5.67986e-05	0.00135131	None	None	4.24566
C1orf87	-2.04121	0.612463	NA	None	None	0.21292
LINC02778	NA	NA	NA	None	None	NA
LINC01748	-0.451757	0.509189	0.737544	None	None	0.293121
AC099792.1	1.65752	0.682272	NA	None	None	0.166042
NFIA	-0.202243	0.69558	0.856078	None	None	0.157653
NFIA-AS2	0.875024	0.830203	NA	None	None	0.0808159
AC099791.3	-1.84757	0.648	NA	None	None	0.188425
AC099791.4	NA	NA	NA	None	None	NA
TM2D1	0.106062	0.738401	0.881449	None	None	0.131708
AC099791.2	-1.04853	0.797207	NA	None	None	0.0984286
PATJ	-0.773128	0.0094903	0.0650963	None	None	2.02272
L1TD1	-0.326248	0.598512	0.797979	None	None	0.222927
KANK4	0.0621651	0.914565	0.96649	None	None	0.0387857
USP1	-0.563591	0.106784	0.303146	None	None	0.971494
DOCK7	0.422434	0.141568	0.356357	None	None	0.849035
ANGPTL3	-5.39703	0.00598249	0.0468697	None	None	2.22312
AC103923.1	0.32098	0.777197	0.900307	None	None	0.109469
ATG4C	0.422099	0.140067	0.354363	None	None	0.853665
LINC01739	NA	NA	NA	None	None	NA
LINC00466	-2.95951	0.306997	NA	None	None	0.512866
FOXD3-AS1	NA	NA	NA	None	None	NA
FOXD3	NA	NA	NA	None	None	NA
ALG6	-0.174866	0.63975	0.821856	None	None	0.19399
ITGB3BP	-1.6025	0.00054744	0.00801012	None	None	3.26166
BX004807.1	-1.78262	0.00511673	0.0418594	None	None	2.29101
EFCAB7	-3.03414	3.42869e-07	2.12872e-05	None	None	6.46487
DLEU2L	-5.42488	0.0637793	0.224777	None	None	1.19532
PGM1	0.345788	0.422483	0.665439	None	None	0.374191
ROR1	0.220175	0.776224	0.899887	None	None	0.110013
ROR1-AS1	-1.8691	0.265886	0.515604	None	None	0.575304
UBE2U	NA	NA	NA	None	None	NA
CACHD1	0.875024	0.830203	NA	None	None	0.0808159
RAVER2	-1.62302	0.137573	0.350985	None	None	0.861467
JAK1	-0.0193574	0.948979	0.980758	None	None	0.0227435
AK4	-1.84365	2.05074e-08	1.93634e-06	None	None	7.68809
DNAJC6	1.31491	0.00128167	0.0153167	None	None	2.89222
AL139294.1	0.533958	0.262449	0.511665	None	None	0.580955
LEPROT	0.457977	0.0858386	0.267016	None	None	1.06632
LEPR	0.187724	0.659936	0.833769	None	None	0.180498
AC119800.1	0.875024	0.830203	NA	None	None	0.0808159
PDE4B	1.38949	0.241737	0.490009	None	None	0.616657
AL590783.1	0.711683	0.627896	0.81506	None	None	0.202112
SGIP1	-2.61641	0.107472	0.303909	None	None	0.968705
AL139147.1	-1.04853	0.797207	NA	None	None	0.0984286
WDR78	-1.05701	0.0270684	0.13086	None	None	1.56754
MIER1	0.30205	0.237235	0.485202	None	None	0.624821
SLC35D1	0.0338568	0.947159	0.979817	None	None	0.0235773
C1orf141	NA	NA	NA	None	None	NA
IL23R	NA	NA	NA	None	None	NA
IL12RB2	-0.719548	0.265225	0.514914	None	None	0.576385
SERBP1	0.251771	0.242551	0.490814	None	None	0.615197
GADD45A	-0.499155	0.332719	0.583847	None	None	0.477923
GNG12	1.809	2.58717e-07	1.69324e-05	None	None	6.58718
GNG12-AS1	0.883999	0.0109102	0.071971	None	None	1.96217
DIRAS3	NA	NA	NA	None	None	NA
WLS	1.2735	0.00280735	0.0273626	None	None	2.5517
RPE65	NA	NA	NA	None	None	NA
DEPDC1	-0.189897	0.751016	0.888351	None	None	0.124351
AL138789.1	-1.9468	0.629698	NA	None	None	0.200867
DEPDC1-AS1	NA	NA	NA	None	None	NA
AL033530.1	-0.992238	0.393204	0.639421	None	None	0.405382
AL691520.1	-1.89747	0.638773	NA	None	None	0.194653
LINC01707	1.98486	0.621534	NA	None	None	0.206535
AL359894.1	NA	NA	NA	None	None	NA
LRRC7	-0.453835	0.262047	0.511538	None	None	0.581621
LRRC40	-0.3062	0.319502	0.570722	None	None	0.495526
SRSF11	0.177797	0.415446	0.659047	None	None	0.381485
AL353771.1	-3.16091	0.425188	NA	None	None	0.371419
ANKRD13C	0.518539	0.00188932	0.0204121	None	None	2.72369
HHLA3	-0.338051	0.353398	0.60322	None	None	0.451736
AL158839.1	-3.58791	0.173512	0.400514	None	None	0.760671
LINC01788	NA	NA	NA	None	None	NA
PTGER3	1.06174	0.488908	0.720192	None	None	0.310773
ZRANB2-AS1	-0.729663	0.0645379	0.22587	None	None	1.19019
ZRANB2	0.376917	0.0370207	0.159685	None	None	1.43156
ZRANB2-AS2	-0.697935	0.162386	0.385176	None	None	0.789451
NEGR1	-2.97081	0.10941	0.306972	None	None	0.960944
AL513166.1	-0.510352	0.836029	0.931325	None	None	0.0777785
AL583808.1	1.98109	0.411705	0.656216	None	None	0.385414
LINC02796	0.875024	0.830203	NA	None	None	0.0808159
LINC02797	0.714207	0.859926	NA	None	None	0.065539
AL591463.1	NA	NA	NA	None	None	NA
LRRIQ3	-5.05662	0.081283	0.258659	None	None	1.09
FPGT	-1.12281	0.0129824	0.0807517	None	None	1.88665
TNNI3K	-1.125	0.098098	0.289266	None	None	1.00834
AC093158.1	-4.74148	0.227147	0.472795	None	None	0.643692
ERICH3	NA	NA	NA	None	None	NA
CRYZ	-0.663776	0.227684	0.473413	None	None	0.642667
TYW3	0.570157	0.0987007	0.290238	None	None	1.00568
SLC44A5	-0.203693	0.64043	0.822204	None	None	0.193529
ACADM	-0.481775	0.44507	0.684715	None	None	0.351571
RABGGTB	-0.0323357	0.906383	0.962422	None	None	0.0426882
MSH4	-1.63913	0.0362512	0.157902	None	None	1.44068
ASB17	NA	NA	NA	None	None	NA
AC092813.1	NA	NA	NA	None	None	NA
ST6GALNAC3	-0.512036	0.837244	NA	None	None	0.0771479
ST6GALNAC5	0.445425	0.908358	NA	None	None	0.0417432
AL035409.1	NA	NA	NA	None	None	NA
PIGK	0.62908	0.202457	0.439878	None	None	0.693667
AK5	1.21298	0.273048	0.523653	None	None	0.56376
AC118549.1	0.767497	0.000209986	0.00375058	None	None	3.67781
USP33	0.822481	3.55849e-05	0.000909945	None	None	4.44873
MIGA1	0.568612	0.0504104	0.19395	None	None	1.29748
NEXN-AS1	-0.37916	0.437174	0.678476	None	None	0.359346
NEXN	0.308265	0.275472	0.52662	None	None	0.559923
FUBP1	1.04179	1.43393e-07	1.044e-05	None	None	6.84347
DNAJB4	-1.0836	0.00212044	0.0222205	None	None	2.67357
GIPC2	-0.242158	0.636228	0.820218	None	None	0.196387
AC103591.3	-1.04157	0.23078	0.476798	None	None	0.636802
AC103591.4	NA	NA	NA	None	None	NA
AC096531.2	NA	NA	NA	None	None	NA
PTGFR	NA	NA	NA	None	None	NA
ADGRL4	NA	NA	NA	None	None	NA
AC099671.1	NA	NA	NA	None	None	NA
AL606519.1	NA	NA	NA	None	None	NA
AL136234.1	1.72631	0.0050344	0.0413645	None	None	2.29805
LINC01781	-0.408522	0.615727	0.807233	None	None	0.210612
ADGRL2	1.54307	0.00670001	0.0506947	None	None	2.17392
AL157944.1	0.133985	0.848111	0.93696	None	None	0.0715475
LINC01362	-0.958934	0.0793377	0.255111	None	None	1.10052
AC116099.1	NA	NA	NA	None	None	NA
LINC01712	NA	NA	NA	None	None	NA
LINC01725	0.237814	0.738787	0.881526	None	None	0.131481
AL035706.1	NA	NA	NA	None	None	NA
TTLL7	-0.570288	0.527051	0.7487	None	None	0.278147
AL359504.2	0.759295	0.739619	NA	None	None	0.130992
PRKACB	0.226653	0.707547	0.863335	None	None	0.150245
SAMD13	-3.73964	0.315706	NA	None	None	0.500717
DNASE2B	NA	NA	NA	None	None	NA
RPF1	-0.105243	0.714492	0.867816	None	None	0.146003
GNG5	0.171733	0.462027	0.698066	None	None	0.335332
SPATA1	-0.963327	0.00795859	0.057231	None	None	2.09916
CTBS	-0.428656	0.255018	0.503083	None	None	0.593429
AL359762.1	-3.39687	0.213265	0.454871	None	None	0.671081
SSX2IP	0.421568	0.66947	0.83957	None	None	0.174269
LPAR3	-2.07116	0.0948224	0.283202	None	None	1.02309
MCOLN2	-0.174216	0.942928	0.97844	None	None	0.0255217
WDR63	-1.66675	0.0988695	0.290448	None	None	1.00494
MCOLN3	0.874311	0.825332	NA	None	None	0.0833714
SYDE2	-0.0122199	0.976569	0.991574	None	None	0.0102971
C1orf52	-0.159981	0.519399	0.744266	None	None	0.284499
BCL10	-0.809415	0.00222912	0.0230792	None	None	2.65187
AL078459.1	-0.0973339	0.885591	0.954304	None	None	0.052767
DDAH1	0.17296	0.833305	0.929982	None	None	0.079196
AC092807.2	NA	NA	NA	None	None	NA
CCN1	-0.420639	0.304479	0.557115	None	None	0.516443
ZNHIT6	-0.660937	0.131356	0.341169	None	None	0.881549
COL24A1	-2.40922	0.542529	NA	None	extracellular matrix organization	0.265577
LINC02795	0.695734	0.863572	NA	None	None	0.0637014
ODF2L	-0.239259	0.582933	0.787363	None	None	0.234381
CLCA2	-1.04853	0.797207	NA	None	None	0.0984286
CLCA1	NA	NA	NA	None	None	NA
CLCA4	NA	NA	NA	None	None	NA
CLCA4-AS1	0.102562	0.906479	0.962422	None	None	0.042642
AL049597.2	NA	NA	NA	None	None	NA
SH3GLB1	0.106307	0.758028	0.891676	None	None	0.120315
AL355981.1	1.02308	0.799139	NA	None	None	0.0973778
SELENOF	0.600783	0.00239562	0.024285	None	None	2.62058
HS2ST1	0.458204	0.108385	0.305679	None	None	0.965032
AL121989.1	-0.695116	0.197666	0.433573	None	None	0.704069
LINC01140	1.48072	0.327002	0.578199	None	None	0.485449
LINC02801	-1.79596	0.421378	0.664679	None	None	0.375328
LMO4	-0.138335	0.645612	0.825524	None	None	0.190028
LINC01364	-1.61754	0.0683036	0.234318	None	None	1.16556
PKN2-AS1	-1.00496	0.0159428	0.0926903	None	None	1.79744
PKN2	-0.529319	0.0967756	0.2867	None	None	1.01423
GTF2B	0.0375159	0.859186	0.941998	None	None	0.0659126
KYAT3	0.134503	0.653486	0.830553	None	None	0.184764
RBMXL1	0.100005	0.714984	0.868239	None	None	0.145704
GBP3	-0.415791	0.513843	0.741063	None	None	0.28917
GBP1	-0.60167	0.609571	0.804229	None	None	0.214976
GBP2	-0.92443	0.137127	0.350484	None	None	0.862876
AC104459.1	-4.53538	0.248344	0.497306	None	None	0.604946
GBP7	-2.84053	0.475168	NA	None	None	0.323153
GBP4	-1.04853	0.797207	NA	None	None	0.0984286
GBP5	NA	NA	NA	None	None	NA
GBP6	NA	NA	NA	None	None	NA
AL596214.1	-1.48487	0.483656	0.715655	None	None	0.315463
LRRC8B	0.414502	0.484549	0.716566	None	None	0.314662
LRRC8C-DT	-0.842099	0.240818	0.489108	None	None	0.618312
LRRC8C	-0.84783	0.203292	0.44081	None	None	0.691879
AC099568.2	1.27316	0.321493	0.57208	None	None	0.492828
LRRC8D	-0.821151	0.00850418	0.0600827	None	None	2.07037
AL391497.1	NA	NA	NA	None	None	NA
ZNF326	-0.646268	0.000135191	0.00264959	None	None	3.86905
AL161797.1	NA	NA	NA	None	None	NA
AC098656.1	NA	NA	NA	None	None	NA
AL627316.1	NA	NA	NA	None	None	NA
LINC02609	-0.68299	0.262335	0.511665	None	None	0.581143
LINC02788	-4.22487	0.0923089	0.278681	None	None	1.03476
LINC01763	NA	NA	NA	None	None	NA
ZNF644	0.804702	0.0220378	0.114853	None	None	1.65683
HFM1	0.0989251	0.916833	0.967478	None	None	0.0377097
CDC7	0.394494	0.200285	0.436913	None	None	0.698352
TGFBR3	1.92172	1.00822e-16	7.03e-14	None	None	15.9964
BRDT	0.577259	0.266071	0.515837	None	None	0.575003
EPHX4	1.44926	0.0455676	0.181999	None	None	1.34134
BTBD8	0.315347	0.48056	0.712353	None	None	0.318252
AC104836.1	NA	NA	NA	None	None	NA
C1orf146	-4.24803	0.20356	NA	None	None	0.691307
GLMN	0.799355	0.0132754	0.0820457	None	None	1.87695
RPAP2	0.549371	0.0579122	0.211458	None	None	1.23723
GFI1	-2.04121	0.612463	NA	None	None	0.21292
EVI5	0.845055	3.62241e-07	2.19634e-05	None	None	6.441
RPL5	0.248785	0.449238	0.688398	None	None	0.347523
DIPK1A	1.01987	1.49342e-06	6.81968e-05	None	None	5.82582
AC093577.1	0.875024	0.830203	NA	None	None	0.0808159
MTF2	0.220482	0.284222	0.536288	None	None	0.546343
TMED5	0.558041	0.0342697	0.152595	None	None	1.46509
CCDC18	-1.10461	0.00169119	0.0187473	None	None	2.77181
CCDC18-AS1	-0.916144	0.0252179	0.125425	None	None	1.59829
DR1	0.237558	0.375978	0.622745	None	None	0.424838
FNBP1L	-0.102497	0.758237	0.891676	None	None	0.120195
BCAR3	0.825859	0.00883812	0.0619352	None	None	2.05364
AL109613.1	0.0600739	0.886456	0.954733	None	None	0.0523429
AL049796.1	-4.22808	0.0797976	0.255803	None	None	1.09801
DNTTIP2	0.00610394	0.979879	0.992526	None	None	0.00882764
ABCA4	-1.12054	0.1892	0.422103	None	None	0.723078
ARHGAP29	-0.0261193	0.95878	0.985023	None	None	0.0182812
ARHGAP29-AS1	-0.553672	0.735803	0.880078	None	None	0.133238
AC118469.2	NA	NA	NA	None	None	NA
ABCD3	1.15163	5.61417e-06	0.000201943	None	None	5.25071
F3	-0.812048	0.541064	0.757816	None	None	0.266751
SLC44A3	-1.63814	1.20586e-09	1.69466e-07	None	None	8.9187
CNN3	-0.742894	0.00347803	0.0320067	None	None	2.45867
AC105942.1	-2.99327	0.00943598	0.0648364	None	None	2.02521
ALG14	0.605142	0.136315	0.34909	None	None	0.865458
AC095033.1	NA	NA	NA	None	None	NA
TLCD4	0.432215	0.580908	0.785788	None	None	0.235893
AC092802.1	-1.25437	0.364406	0.612775	None	None	0.438415
RWDD3	-0.144043	0.783686	0.903207	None	None	0.105858
AC092802.2	-4.41204	0.0159477	0.0926903	None	None	1.7973
LINC02607	-1.84757	0.648	NA	None	None	0.188425
LINC01787	NA	NA	NA	None	None	NA
PTBP2	0.193619	0.565163	0.775922	None	None	0.247826
DPYD	-0.774219	0.690143	0.853045	None	None	0.161061
DPYD-AS1	NA	NA	NA	None	None	NA
SNX7	0.049603	0.916044	0.96687	None	None	0.0380837
PLPPR5	NA	NA	NA	None	None	NA
AL445433.2	NA	NA	NA	None	None	NA
PLPPR4	NA	NA	NA	None	None	NA
LINC01708	1.85942	0.389519	0.636293	None	None	0.409472
PALMD	-0.526514	0.674246	0.842065	None	None	0.171181
FRRS1	-0.250743	0.649767	0.827975	None	None	0.187242
AGL	-0.0102472	0.973759	0.990605	None	None	0.0115486
AC118553.1	-4.97713	0.0900448	0.274819	None	None	1.04554
SLC35A3	-0.125268	0.703995	0.861357	None	None	0.15243
MFSD14A	0.450925	0.00891142	0.062279	None	None	2.05005
AC093019.2	-0.183094	0.582908	0.787363	None	None	0.2344
SASS6	-0.0244981	0.932634	0.974148	None	None	0.030289
TRMT13	0.0798261	0.749963	0.887699	None	None	0.12496
LRRC39	-0.40419	0.338551	0.589813	None	None	0.470375
DBT	0.103345	0.79506	0.908747	None	None	0.0996002
AL445928.2	-0.839653	0.0277734	0.133097	None	None	1.55637
RTCA-AS1	-1.48455	0.0225957	0.11654	None	None	1.64597
RTCA	-0.66753	0.192319	0.4265	None	None	0.715977
CDC14A	1.41135	2.74333e-07	1.77621e-05	None	None	6.56172
AL589990.1	0.344489	0.585684	0.789433	None	None	0.232337
EXTL2	0.231516	0.382017	0.628897	None	None	0.417917
AC104506.1	-0.484159	0.376113	0.622813	None	None	0.424682
SLC30A7	0.72732	0.00278439	0.0271973	None	None	2.55527
DPH5	-0.884576	0.00610589	0.0475488	None	None	2.21425
AC093157.2	NA	NA	NA	None	None	NA
AC093157.1	-0.363352	0.204427	0.442619	None	None	0.689462
LINC01307	0.875024	0.830203	NA	None	None	0.0808159
LINC01709	NA	NA	NA	None	None	NA
OLFM3	-4.74148	0.227147	0.472795	None	None	0.643692
AC114485.1	-2.27347	NA	NA	None	None	NA
AC099567.1	-5.35943	2.85744e-07	1.84351e-05	None	None	6.54402
COL11A1	-5.08476	7.79322e-06	0.000263588	None	extracellular matrix organization	5.10828
AC095032.2	NA	NA	NA	None	None	NA
AC095032.1	-0.314381	0.604652	0.801056	None	None	0.218495
RNPC3	0.0941708	0.63818	0.821319	None	None	0.195057
AMY2B	-0.784934	0.355654	0.605183	None	None	0.448973
AL591888.1	NA	NA	NA	None	None	NA
LINC01677	NA	NA	NA	None	None	NA
AL355306.2	NA	NA	NA	None	None	NA
PRMT6	0.265842	0.645229	0.825514	None	None	0.190286
NTNG1	0.568135	0.500475	0.730524	None	None	0.300618
VAV3	0.885309	2.12805e-05	0.000599059	None	None	4.67202
VAV3-AS1	NA	NA	NA	None	None	NA
SLC25A24	0.217453	0.608766	0.803752	None	None	0.215549
AL359258.2	NA	NA	NA	None	None	NA
NBPF4	NA	NA	NA	None	None	NA
AL359258.1	NA	NA	NA	None	None	NA
AL390038.1	0.875024	0.830203	NA	None	None	0.0808159
NBPF6	-5.22646	0.159471	0.381556	None	None	0.797318
FAM102B	2.11369	1.29471e-06	6.12839e-05	None	None	5.88783
HENMT1	-0.511779	0.512249	0.739729	None	None	0.290519
AL160171.1	-5.15041	0.0259993	0.127612	None	None	1.58504
PRPF38B	0.512985	0.00655956	0.0500287	None	None	2.18313
FNDC7	4.50693	0.084304	0.264191	None	None	1.07415
STXBP3	0.742952	0.000802383	0.0107991	None	None	3.09562
AKNAD1	0.766508	0.00143701	0.0165934	None	None	2.84254
SPATA42	NA	NA	NA	None	None	NA
CLCC1	0.145885	0.807571	0.914971	None	None	0.0928192
WDR47	0.190427	0.526461	0.748598	None	None	0.278633
TAF13	0.461318	0.106206	0.302262	None	None	0.973851
AL356488.3	-1.00378	0.0682774	0.234299	None	None	1.16572
TMEM167B	-0.555027	0.0354504	0.155763	None	None	1.45038
AL356488.2	-5.75863	0.00660185	0.0502667	None	None	2.18033
C1orf194	-5.81278	0.00584947	0.0460865	None	None	2.23288
KIAA1324	-0.234232	0.767688	0.896105	None	None	0.114815
SARS	-0.0827807	0.708989	0.864317	None	None	0.14936
CELSR2	-0.670604	0.656714	0.832441	None	None	0.182624
PSRC1	-2.75203	0.101748	0.295077	None	None	0.992473
MYBPHL	-3.86523	0.290045	NA	None	None	0.537535
SORT1	-0.103355	0.731978	0.877993	None	None	0.135502
PSMA5	0.45528	0.0538844	0.202413	None	None	1.26854
SYPL2	2.66876	0.502301	NA	None	None	0.299036
ATXN7L2	-1.62734	0.330199	0.581804	None	None	0.481224
CYB561D1	-1.08783	0.00504215	0.0413991	None	None	2.29738
AMIGO1	NA	NA	NA	None	None	NA
GPR61	-3.04768	0.442491	NA	None	None	0.354095
AL355310.3	NA	NA	NA	None	None	NA
GNAI3	-0.168772	0.333306	0.584183	None	None	0.477157
AL355310.1	NA	NA	NA	None	None	NA
GNAT2	NA	NA	NA	None	None	NA
AMPD2	0.416726	0.40069	0.645814	None	None	0.397191
AL355310.2	NA	NA	NA	None	None	NA
GSTM4	-3.04768	0.442491	NA	None	None	0.354095
GSTM2	-0.668457	0.717274	0.869738	None	None	0.144315
GSTM1	-2.04121	0.612463	NA	None	None	0.21292
AC000032.1	NA	NA	NA	None	None	NA
GSTM5	NA	NA	NA	None	None	NA
AL158847.1	NA	NA	NA	None	None	NA
GSTM3	0.343715	0.705133	0.86186	None	None	0.151729
EPS8L3	NA	NA	NA	None	None	NA
LINC01768	NA	NA	NA	None	None	NA
CSF1	NA	NA	NA	None	None	NA
AHCYL1	0.11046	0.606332	0.801998	None	None	0.21729
STRIP1	-0.00949546	0.965277	0.987663	None	None	0.015348
AL160006.1	-0.514698	0.352425	0.602463	None	None	0.452933
ALX3	-5.54159	0.0357502	0.156663	None	None	1.44672
LINC01397	NA	NA	NA	None	None	NA
SLC6A17	NA	NA	NA	None	None	NA
KCNC4	1.74056	0.224817	0.470387	None	None	0.648171
RBM15-AS1	-3.10902	0.211975	0.453085	None	None	0.673714
RBM15	-0.620005	0.0361945	0.157771	None	None	1.44136
LAMTOR5-AS1	-0.199637	0.342206	0.593215	None	None	0.465713
SLC16A4	0.0403329	0.887933	0.955389	None	None	0.0516197
AL355488.1	-0.43671	0.465063	0.70037	None	None	0.332489
LAMTOR5	-0.136682	0.630325	0.817043	None	None	0.200435
KCNA2	0.875024	0.830203	NA	None	None	0.0808159
CD53	2.90501	0.0903409	0.27525	None	None	1.04412
AL360270.2	1.13413	0.454189	0.692306	None	None	0.342764
AL360270.1	-0.478522	0.205596	0.444566	None	None	0.686986
LRIF1	-0.0764476	0.719579	0.870765	None	None	0.142921
AL360270.3	-1.04853	0.797207	NA	None	None	0.0984286
DRAM2	0.0901157	0.75991	0.892427	None	None	0.119238
CEPT1	-0.0821764	0.779075	0.901389	None	None	0.108421
AL355816.1	NA	NA	NA	None	None	NA
AL355816.2	1.10916	0.107609	0.304129	None	None	0.968151
DENND2D	1.01296	0.00011853	0.00242258	None	None	3.92617
CHI3L2	0.109152	0.904005	0.961632	None	None	0.0438293
CHIA	NA	NA	NA	None	None	NA
PIFO	-6.88178	8.94442e-05	0.00194208	None	None	4.04845
OVGP1	0.582026	0.107007	0.303474	None	None	0.970589
AL390195.2	2.20356	0.0522959	0.198744	None	None	1.28153
AL390195.1	1.47969	0.103871	0.298428	None	None	0.983505
WDR77	0.729488	0.0535775	0.201683	None	None	1.27102
ATP5PB	0.34322	0.165343	0.389424	None	None	0.781614
C1orf162	-2.71136	0.137495	0.350985	None	None	0.861712
TMIGD3	-4.69187	0.123753	0.329798	None	None	0.907445
RAP1A	0.696808	0.00615028	0.0476642	None	None	2.2111
INKA2	-0.221415	0.44128	0.682068	None	None	0.355285
INKA2-AS1	NA	NA	NA	None	None	NA
AL049557.1	NA	NA	NA	None	None	NA
DDX20	-0.147483	0.72781	0.875405	None	None	0.137982
KCND3	-5.24568	0.0620957	0.220955	None	None	1.20694
AL445426.1	NA	NA	NA	None	None	NA
CTTNBP2NL	0.795866	0.000822397	0.0109964	None	None	3.08492
WNT2B	1.07673	0.000179433	0.00330685	None	None	3.7461
AL354760.1	NA	NA	NA	None	None	NA
ST7L	0.282258	0.29215	0.544224	None	None	0.534394
CAPZA1	-0.160405	0.382166	0.629043	None	None	0.417748
MOV10	-0.0625677	0.878893	0.951065	None	None	0.056064
AL603832.1	-4.65623	0.130449	0.339687	None	None	0.884561
RHOC	-0.446395	0.367629	0.615738	None	None	0.43459
PPM1J	NA	NA	NA	None	None	NA
TAFA3	NA	NA	NA	None	None	NA
LINC01356	1.96674	0.00260531	0.0259088	None	None	2.58414
LINC01357	0.522482	0.0542449	0.203309	None	None	1.26564
SLC16A1	0.018247	0.938984	0.976389	None	None	0.027342
SLC16A1-AS1	-0.723803	0.076324	0.249716	None	None	1.11734
AL390242.1	-1.26122	0.0760285	0.249019	None	None	1.11902
LRIG2-DT	-0.756045	0.190522	0.423853	None	None	0.720054
LRIG2	-0.0741098	0.754547	0.889433	None	None	0.122314
MAGI3	0.184363	0.662585	0.835426	None	None	0.178758
PHTF1	-0.046199	0.914504	0.96649	None	None	0.0388145
RSBN1	-0.530927	0.0149542	0.0890325	None	None	1.82524
AL137856.1	-4.07936	0.096372	0.285992	None	None	1.01605
PTPN22	-0.908472	0.689318	0.852606	None	None	0.16158
AP4B1-AS1	-5.30449	0.0100958	0.068141	None	None	1.99586
BCL2L15	NA	NA	NA	None	None	NA
AP4B1	-0.8122	0.590346	0.793167	None	None	0.228893
DCLRE1B	-3.24369	0.250436	NA	None	None	0.601303
HIPK1-AS1	-3.1604	0.0751951	0.247374	None	None	1.12381
HIPK1	0.161263	0.427088	0.669261	None	None	0.369482
OLFML3	NA	NA	NA	None	None	NA
TRIM33	0.629065	0.0901266	0.274976	None	None	1.04515
BCAS2	-0.312118	0.380364	0.626818	None	None	0.4198
DENND2C	-0.343983	0.495841	0.725747	None	None	0.304658
AMPD1	NA	NA	NA	None	None	NA
NRAS	-0.419253	0.0985306	0.289883	None	None	1.00643
CSDE1	0.452778	0.0151702	0.0899054	None	None	1.81901
SIKE1	-0.189509	0.452081	0.69081	None	None	0.344784
SYCP1	NA	NA	NA	None	None	NA
TSPAN2	-4.24867	0.0226411	0.116741	None	None	1.6451
LINC01765	NA	NA	NA	None	None	NA
AL049825.1	NA	NA	NA	None	None	NA
NGF-AS1	-4.41679	0.0166714	0.0951402	None	None	1.77803
NGF	-1.09798	0.0820854	0.260207	None	learning or memory	1.08573
AL512638.3	NA	NA	NA	None	None	NA
VANGL1	0.0479329	0.949355	0.980899	None	None	0.0225715
CASQ2	NA	NA	NA	None	None	NA
SLC22A15	-1.57096	0.00384901	0.0343568	None	None	2.41465
AL365318.1	NA	NA	NA	None	None	NA
MAB21L3	-1.4981	0.0873474	0.27041	None	None	1.05875
ATP1A1-AS1	0.391226	0.152648	0.371757	None	None	0.816308
LINC01762	1.9637	2.22139e-05	0.000620518	None	None	4.65337
AL390066.1	NA	NA	NA	None	None	NA
CD58	-0.110241	0.798189	0.910497	None	None	0.0978944
IGSF3	-0.92017	0.00860775	0.0606019	None	None	2.06511
C1orf137	NA	NA	NA	None	None	NA
PTGFRN	2.3018	4.22294e-05	0.00105451	None	None	4.37439
CD101	3.1419	0.0880311	0.271553	None	None	1.05536
AL445231.1	-0.783434	0.691913	0.854037	None	None	0.159949
TTF2	0.257648	0.508373	0.736891	None	None	0.293818
TRIM45	-0.0387456	0.969205	0.988709	None	None	0.0135844
VTCN1	-0.553925	0.775018	0.899248	None	None	0.110688
LINC01525	-1.00781	0.618786	0.809556	None	None	0.20846
AL358072.1	-5.02246	0.031006	0.142631	None	None	1.50855
MAN1A2	2.36159	2.38661e-15	1.27256e-12	None	None	14.6222
AL157902.1	NA	NA	NA	None	None	NA
TENT5C	-1.59048	0.00139331	0.0163044	None	None	2.85595
GDAP2	0.890846	3.31432e-05	0.000859589	None	None	4.47961
WDR3	0.504316	0.112342	0.311587	None	None	0.949457
SPAG17	-0.53439	0.389625	0.636352	None	None	0.409353
AL391557.1	NA	NA	NA	None	None	NA
TBX15	1.89783	0.221843	0.466511	None	None	0.653954
WARS2	0.973574	0.00256298	0.0256001	None	None	2.59125
WARS2-IT1	0.216911	0.72183	0.871704	None	None	0.141565
WARS2-AS1	0.716339	0.0563069	0.207858	None	None	1.24944
AL359915.1	0.466747	0.441199	0.682	None	None	0.355366
LINC01780	NA	NA	NA	None	None	NA
HSD3B1	0.589666	0.0739256	0.244874	None	None	1.1312
LINC00622	-4.05045	0.112316	0.311579	None	None	0.949559
ZNF697	0.762088	0.0201416	0.107968	None	None	1.69591
PHGDH	0.760233	0.0450249	0.180548	None	None	1.34655
HMGCS2	NA	NA	NA	None	None	NA
NOTCH2	0.628789	0.0117085	0.0753877	None	None	1.9315
SEC22B	0.10747	0.619099	0.809769	None	None	0.20824
NBPF26	-0.0686646	0.89795	0.959281	None	None	0.0467478
AC253572.2	-6.99433	3.35853e-06	0.000132607	None	None	5.47385
LINC00623	-0.486723	0.415481	0.659047	None	None	0.381449
FCGR1B	NA	NA	NA	None	None	NA
AC244453.3	-3.73964	0.315706	NA	None	None	0.500717
AC244453.2	NA	NA	NA	None	None	NA
AC244453.1	NA	NA	NA	None	None	NA
FAM72B	-3.79965	0.305958	NA	None	None	0.514339
SRGAP2C	0.578137	0.0257953	0.126836	None	None	1.58846
SRGAP2-AS1	-0.524948	0.324551	0.575262	None	None	0.488718
LINC02798	0.371257	0.518369	0.743709	None	None	0.285361
AL592494.2	NA	NA	NA	None	None	NA
AC239800.2	NA	NA	NA	None	None	NA
LINC02591	-1.28494	0.504898	0.733555	None	None	0.296796
HIST2H3PS2	-0.508753	0.724337	0.873515	None	None	0.140059
AC246680.1	NA	NA	NA	None	None	NA
FAM72C	NA	NA	NA	None	None	NA
LINC02802	-0.816249	0.0970329	0.287248	None	None	1.01308
AC246785.3	NA	NA	NA	None	None	NA
NBPF15	-0.806389	0.311586	0.563521	None	None	0.506423
FP700111.1	-2.10381	0.068867	0.235396	None	None	1.16199
SRGAP2B	0.339973	0.392724	0.639168	None	None	0.405913
FAM72D	-3.73964	0.315706	NA	None	None	0.500717
AC245014.3	-5.46171	0.0069273	0.0516598	None	None	2.15944
NBPF20	-2.67245	0.312865	0.564482	None	None	0.504643
AC239860.4	-4.70459	0.129942	0.339212	None	None	0.886252
GPR89A	0.136513	0.626473	0.814496	None	None	0.203098
PDZK1	-0.778601	0.134952	0.347554	None	None	0.869822
CD160	-2.87877	0.101128	0.293948	None	None	0.995128
RNF115	-0.451656	0.305437	0.557952	None	None	0.515079
POLR3C	-0.0729312	0.860472	0.942226	None	None	0.0652635
NUDT17	-2.40582	0.135317	0.348213	None	None	0.868648
PIAS3	-0.270631	0.5028	0.732169	None	None	0.298605
ANKRD35	NA	NA	NA	None	None	NA
ITGA10	-2.8753	0.442382	NA	None	None	0.354202
PEX11B	-0.677382	0.349447	0.599795	None	None	0.456619
RBM8A	-0.26237	0.259018	0.507811	None	None	0.58667
LIX1L-AS1	-0.716019	0.134984	0.347554	None	None	0.869718
LIX1L	-4.51464	0.153616	0.372911	None	None	0.813564
ANKRD34A	-4.6725	0.129128	0.337996	None	None	0.88898
POLR3GL	-0.438438	0.722993	0.872449	None	None	0.140866
TXNIP	NA	NA	NA	None	None	NA
HJV	0.875024	0.830203	NA	None	None	0.0808159
AC239799.2	-1.64544	0.00152128	0.0173782	None	None	2.81779
LINC01719	-0.252559	0.679452	0.846118	None	None	0.167841
NBPF10	0.911494	0.160887	0.383125	None	None	0.793478
NOTCH2NLA	0.935084	0.0914456	0.276964	None	None	1.03884
AC239799.1	NA	NA	NA	None	None	NA
AC245407.2	-0.344579	0.537935	0.755583	None	None	0.26927
NBPF12	-0.121476	0.789808	0.906172	None	None	0.102478
PRKAB2	-1.29557	0.00118368	0.014402	None	None	2.92677
AC242426.2	-0.346588	0.23404	0.481135	None	None	0.630711
FMO5	-0.95943	0.00498481	0.0410771	None	None	2.30235
CHD1L	-2.9473	0.458163	NA	None	None	0.33898
LINC00624	-0.260228	0.522766	0.746281	None	None	0.281692
BCL9	0.0366466	0.935493	0.975496	None	None	0.0289595
ACP6	0.698771	0.011293	0.0733378	None	None	1.94719
GJA5	1.41367	0.00390562	0.0347424	None	None	2.40831
GPR89B	0.321137	0.316476	0.568261	None	None	0.499659
AC239803.1	NA	NA	NA	None	None	NA
LINC02804	-3.3969	0.210847	0.451399	None	None	0.676033
NBPF11	0.0787539	0.778819	0.901264	None	None	0.108564
LINC02805	-2.80253	0.174579	0.401643	None	None	0.758008
AC239809.3	0.789001	0.461834	0.697891	None	None	0.335514
LINC01731	1.832	0.228693	0.474368	None	None	0.640747
LINC01138	0.6781	0.0111611	0.07273	None	None	1.95229
LINC02806	3.44017	0.00436154	0.0374919	None	None	2.36036
AC245100.1	1.82806	0.0564772	0.208205	None	None	1.24813
PPIAL4G	NA	NA	NA	None	None	NA
NBPF14	0.959662	0.021402	0.11279	None	None	1.66955
NUDT4B	NA	NA	NA	None	None	NA
PDE4DIP	1.02533	9.14064e-05	0.0019751	None	None	4.03902
AC239802.2	-3.371	0.394156	NA	None	None	0.404332
AC239804.1	NA	NA	NA	None	None	NA
NBPF9	-0.0313008	0.944506	0.979096	None	None	0.0247953
AC245297.3	0.23164	0.525666	0.748199	None	None	0.27929
AC245297.2	NA	NA	NA	None	None	NA
NOTCH2NLC	0.610496	0.111729	0.310808	None	None	0.951833
NBPF19	0.5635	0.294302	0.546742	None	None	0.531207
AC242842.1	NA	NA	NA	None	None	NA
FCGR1A	NA	NA	NA	None	None	NA
HIST2H2BF	0.587828	0.169379	0.395146	None	None	0.77114
AC243772.2	0.368635	0.689812	0.85284	None	None	0.161269
HIST2H3D	NA	NA	NA	None	None	NA
HIST2H4A	NA	NA	NA	None	None	NA
HIST2H2AA4	-0.2922	0.598583	0.797979	None	None	0.222876
HIST2H4B	-5.17615	0.0705513	0.238418	None	None	1.15149
AC239868.1	-3.61807	0.35699	NA	None	None	0.447343
HIST2H2BE	0.490083	0.105116	0.300623	None	None	0.978331
HIST2H2AC	-0.726874	0.0640814	0.225491	None	None	1.19327
HIST2H2AB	-5.15763	0.0264677	0.128864	None	None	1.57728
BOLA1	0.407998	0.165529	0.389774	None	None	0.781127
SV2A	-2.70107	0.307954	0.559914	None	None	0.511514
SF3B4	0.0313725	0.934303	0.974818	None	None	0.0295123
MTMR11	-0.572431	0.15552	0.375823	None	None	0.808214
OTUD7B	-0.00738329	0.972038	0.989781	None	None	0.012317
AC244033.2	0.0287841	0.958868	0.985043	None	None	0.0182412
VPS45	0.502403	0.164122	0.38762	None	None	0.784833
PLEKHO1	-4.02538	0.267683	NA	None	None	0.572379
AC242988.2	NA	NA	NA	None	None	NA
ANP32E	-0.614767	0.0430452	0.175291	None	None	1.36607
AC242988.1	NA	NA	NA	None	None	NA
CA14	-2.04121	0.612463	NA	None	None	0.21292
APH1A	-0.215906	0.580295	0.785498	None	None	0.236351
C1orf54	-0.305335	0.669257	0.839508	None	None	0.174407
CIART	NA	NA	NA	None	None	NA
MRPS21	0.254268	0.222567	0.467221	None	None	0.652539
PRPF3	0.124754	0.602669	0.800072	None	None	0.219921
RPRD2	0.643997	0.0111568	0.0727296	None	None	1.95246
TARS2	-0.406273	0.207861	0.447436	None	None	0.682227
ECM1	1.19432	0.000717977	0.00996647	None	None	3.14389
FALEC	-0.282438	0.666328	0.837687	None	None	0.176312
AL356356.1	0.0401483	0.91284	0.965456	None	None	0.0396051
ADAMTSL4	0.0263396	0.934031	0.974732	None	None	0.0296388
ADAMTSL4-AS1	0.927184	0.0490397	0.190992	None	None	1.30945
MCL1	-0.354421	0.206802	0.446164	None	None	0.684445
ENSA	-0.159372	0.327378	0.578464	None	None	0.484951
GOLPH3L	-0.497438	0.139025	0.353047	None	None	0.856909
HORMAD1	NA	NA	NA	None	None	NA
CTSS	-2.63744	0.401601	NA	None	extracellular matrix organization	0.396206
CTSK	0.948806	0.0562003	0.207676	None	None	1.25026
ARNT	1.16269	0.000265509	0.00448144	None	None	3.57592
CTXND2	1.44453	0.27734	0.528807	None	None	0.556987
SETDB1	-0.0343383	0.894238	0.957908	None	None	0.0485468
CERS2	0.118565	0.736376	0.8803	None	None	0.132901
AL590133.2	NA	NA	NA	None	None	NA
AL590133.1	NA	NA	NA	None	None	NA
ANXA9	-2.17942	0.106075	0.302079	None	None	0.974387
MINDY1	-0.287502	0.530185	0.750642	None	None	0.275573
PRUNE1	0.0879088	0.763469	0.893943	None	None	0.117209
BNIPL	-1.17815	0.0425982	0.174155	None	None	1.37061
C1orf56	-0.731143	0.0478815	0.188352	None	None	1.31983
CDC42SE1	0.457832	0.0261349	0.128054	None	None	1.58278
MLLT11	-0.373553	0.415212	0.658976	None	None	0.38173
GABPB2	0.451573	0.411082	0.655693	None	None	0.386071
AL592424.1	NA	NA	NA	None	None	NA
SEMA6C	-3.34072	0.0168767	0.0959419	None	axon guidance	1.77271
TNFAIP8L2	NA	NA	NA	None	None	NA
SCNM1	-0.31127	0.373118	0.619981	None	None	0.428154
LYSMD1	-0.484653	0.199816	0.436231	None	None	0.69937
VPS72	-0.028747	0.927067	0.971941	None	None	0.0328887
PIP5K1A	0.459521	0.0539771	0.202473	None	None	1.26779
PSMD4	0.12619	0.60751	0.802933	None	None	0.216446
ZNF687-AS1	-0.537069	0.300537	0.553515	None	None	0.522102
ZNF687	-0.0916912	0.821456	0.923431	None	None	0.0854158
PI4KB	0.55235	0.00502799	0.0413578	None	None	2.29861
AL391069.3	NA	NA	NA	None	None	NA
RFX5	1.91112	0.195575	0.430812	None	None	0.708686
AL391069.2	NA	NA	NA	None	None	NA
SELENBP1	-3.371	0.394156	NA	None	None	0.404332
PSMB4	0.179821	0.615107	0.806894	None	None	0.211049
POGZ	-0.163341	0.654164	0.830835	None	None	0.184314
CGN	-2.04014	0.000192427	0.003499	None	None	3.71574
TUFT1	0.0713951	0.855581	0.940653	None	None	0.0677387
AL365436.2	-0.605204	0.140157	0.354363	None	None	0.853386
SNX27	0.740118	0.0057769	0.045594	None	None	2.23831
AL391335.1	-1.10986	0.0748229	0.246818	None	None	1.12597
CELF3	NA	NA	NA	None	None	NA
AL589765.1	NA	NA	NA	None	None	NA
RIIAD1	NA	NA	NA	None	None	NA
AL589765.7	-2.06904	0.185225	0.417065	None	None	0.732301
MRPL9	-0.413201	0.222247	0.466927	None	None	0.653164
OAZ3	-3.72768	0.0671261	0.231641	None	None	1.17311
AL589765.4	NA	NA	NA	None	None	NA
AL589765.5	NA	NA	NA	None	None	NA
TDRKH	0.420679	0.123361	0.329174	None	None	0.908822
TDRKH-AS1	0.640871	0.178971	0.408156	None	None	0.747218
AL589765.6	NA	NA	NA	None	None	NA
RORC	0.0691792	0.962036	0.98635	None	None	0.0168088
C2CD4D	-1.73832	0.567141	0.77674	None	None	0.246309
C2CD4D-AS1	1.51407	0.0123865	0.0785432	None	None	1.90705
THEM4	-0.432643	0.334682	0.585661	None	None	0.475368
AL450992.2	-1.05088	0.0700193	0.237465	None	None	1.15478
AL450992.3	-3.85805	0.327728	NA	None	None	0.484486
S100A10	-1.01138	0.0359149	0.157213	None	None	1.44473
AL450992.1	-0.671654	0.242865	0.491185	None	None	0.614635
S100A11	-0.194502	0.373204	0.620034	None	None	0.428054
TCHHL1	NA	NA	NA	None	None	NA
TCHH	-0.336795	0.666243	0.837666	None	None	0.176368
FLG-AS1	-0.381159	0.88034	0.951643	None	None	0.0553495
FLG2	NA	NA	NA	None	None	NA
SPRR3	-6.42834	0.00979613	0.0665894	None	None	2.00895
SPRR2D	-4.84625	0.0531865	0.200879	None	None	1.2742
PRR9	4.81847	1.60383e-08	1.54659e-06	None	None	7.79484
PGLYRP4	-0.201851	0.959814	NA	None	None	0.0178131
S100A9	-1.21069	1.03544e-07	7.82142e-06	None	None	6.98488
S100A7	-0.653354	0.729721	0.87663	None	None	0.136843
S100A6	-0.347668	0.350972	0.601236	None	None	0.454727
S100A5	NA	NA	NA	None	None	NA
S100A4	-0.492435	0.519171	0.744095	None	None	0.284689
S100A2	NA	NA	NA	None	None	NA
BX470102.2	-3.84198	0.128857	0.337775	None	None	0.889891
S100A16	-1.43871	0.207327	0.446871	None	None	0.683344
S100A14	-2.34577	0.0559142	0.207082	None	None	1.25248
S100A13	-0.124166	0.803524	0.913125	None	None	0.0950011
S100A1	NA	NA	NA	None	None	NA
AL162258.2	0.264904	0.668162	0.839032	None	None	0.175118
CHTOP	0.211448	0.307664	0.559778	None	None	0.511924
SNAPIN	-0.558864	0.112497	0.311652	None	None	0.948861
ILF2	0.128136	0.68314	0.848778	None	None	0.16549
NPR1	0.602167	0.293369	0.545598	None	None	0.532585
INTS3	-0.377274	0.219287	0.463069	None	None	0.658988
AL513523.4	-5.91855	0.00290196	0.0280584	None	None	2.53731
AL513523.3	NA	NA	NA	None	None	NA
SLC27A3	-1.89536	0.239479	0.487811	None	None	0.620732
GATAD2B	0.528852	0.0118403	0.0758491	None	None	1.92664
AL358472.5	-5.79455	0.000127076	0.00254842	None	None	3.89593
DENND4B	-0.658561	0.0462388	0.18383	None	None	1.33499
CRTC2	0.00577708	0.988425	0.995733	None	None	0.00505636
SLC39A1	0.533765	0.129205	0.338053	None	None	0.888721
AL358472.4	-0.15718	0.807487	0.914971	None	None	0.0928646
AL358472.3	-3.76993	0.309051	NA	None	None	0.50997
CREB3L4	0.107678	0.855641	0.940653	None	None	0.0677087
JTB	0.264604	0.298006	0.551138	None	None	0.525774
AL358472.2	-3.3311	0.39994	NA	None	None	0.398005
RAB13	-0.629928	0.0606889	0.218052	None	None	1.21689
RPS27	-0.0892476	0.761383	0.892943	None	None	0.118397
NUP210L	0.329819	0.53734	0.755247	None	None	0.269751
TPM3	-0.0107527	0.954206	0.982766	None	None	0.020358
C1orf189	-2.03016	0.231652	0.478056	None	None	0.635164
C1orf43	-0.0116536	0.9526	0.982237	None	None	0.0210893
UBAP2L	0.240067	0.298142	0.551149	None	None	0.525577
HAX1	-0.778669	0.0047651	0.0398095	None	None	2.32193
ATP8B2	0.140466	0.960216	0.985739	None	None	0.0176309
IL6R-AS1	NA	NA	NA	None	None	NA
IL6R	-1.61935	0.286046	0.5379	None	None	0.543564
SHE	NA	NA	NA	None	None	NA
TDRD10	NA	NA	NA	None	None	NA
UBE2Q1	0.0890005	0.851611	0.938703	None	None	0.0697589
AL592078.2	NA	NA	NA	None	None	NA
CHRNB2	NA	NA	NA	None	None	NA
ADAR	0.0576047	0.891769	0.956647	None	None	0.0497476
AL606500.1	-0.815497	0.791084	NA	None	None	0.101778
KCNN3	-2.96542	0.171513	0.398264	None	None	0.765704
PMVK	-0.280006	0.349717	0.600085	None	None	0.456283
AL451085.1	-5.61295	0.0320154	0.145868	None	None	1.49464
PBXIP1	-0.806272	0.0213673	0.112672	None	None	1.67025
PYGO2	-0.114999	0.704603	0.8617	None	None	0.152055
AL451085.2	-4.48341	0.0584439	0.2128	None	None	1.23326
SHC1	0.101292	0.771588	0.89816	None	None	0.112615
CKS1B	-0.440241	0.379785	0.626378	None	None	0.420462
FLAD1	0.473215	0.129206	0.338053	None	None	0.888718
ZBTB7B	0.433751	0.178957	0.408156	None	None	0.74725
DCST2	-0.781366	0.12197	0.326937	None	None	0.913748
DCST1	-5.21022	0.0248689	0.124544	None	None	1.60434
DCST1-AS1	NA	NA	NA	None	None	NA
ADAM15	0.424179	0.20791	0.44749	None	None	0.682124
EFNA4	0.446241	0.390556	0.637073	None	None	0.408317
EFNA3	-2.95928	0.241466	0.489748	None	axon guidance	0.617144
EFNA1	-0.817522	0.0733175	0.243617	None	None	1.13479
SLC50A1	-0.638461	0.00535168	0.0431971	None	None	2.27151
DPM3	0.529377	0.092728	0.279293	None	None	1.03279
KRTCAP2	0.677167	0.0168422	0.0958057	None	None	1.7736
TRIM46	0.190343	0.780954	0.902123	None	None	0.107374
MUC1	NA	NA	NA	None	None	NA
AC234582.1	-1.93778	0.0936783	0.280988	None	None	1.02836
THBS3	-0.825466	0.0344363	0.153072	None	None	1.46298
MTX1	-0.394981	0.288784	0.541026	None	None	0.539427
AC234582.2	NA	NA	NA	None	None	NA
GBA	-0.265955	0.488843	0.720155	None	None	0.310831
FAM189B	0.266849	0.45282	0.691298	None	None	0.344075
SCAMP3	0.500994	0.100522	0.292985	None	None	0.997739
CLK2	-0.245898	0.321723	0.572264	None	None	0.492518
HCN3	-3.57058	0.17341	0.400444	None	None	0.760926
PKLR	NA	NA	NA	None	None	NA
FDPS	-0.131175	0.686622	0.850722	None	None	0.163282
RUSC1-AS1	-0.543991	0.343382	0.594119	None	None	0.464222
RUSC1	0.218171	0.621336	0.811133	None	None	0.206673
ASH1L	0.338778	0.0620959	0.220955	None	None	1.20694
ASH1L-IT1	0.875024	0.830203	NA	None	None	0.0808159
ASH1L-AS1	-0.0535153	0.895811	0.958503	None	None	0.0477835
AL353807.2	NA	NA	NA	None	None	NA
MSTO1	0.0100867	0.981043	0.992951	None	None	0.00831188
AL353807.5	-0.00856287	0.989045	0.995902	None	None	0.00478383
YY1AP1	0.536472	0.0361416	0.157654	None	None	1.44199
DAP3	1.13179	0.00226085	0.023251	None	None	2.64573
AL162734.1	1.21176	0.302799	0.555754	None	None	0.518846
GON4L	0.515173	0.0251975	0.125423	None	None	1.59864
SYT11	-1.04853	0.797207	NA	None	learning or memory	0.0984286
RIT1	-0.108444	0.71093	0.865893	None	None	0.148173
KHDC4	0.230036	0.322586	0.573237	None	None	0.491354
ARHGEF2	0.542198	0.310138	0.561861	None	None	0.508445
AL355388.2	NA	NA	NA	None	None	NA
AL355388.1	NA	NA	NA	None	None	NA
AL355388.3	-0.672191	0.274905	0.525934	None	None	0.560817
SSR2	0.406218	0.20569	0.444716	None	None	0.686788
UBQLN4	0.322491	0.338951	0.590262	None	None	0.469862
LAMTOR2	-0.292347	0.436739	0.678112	None	None	0.359778
RAB25	-0.366653	0.23484	0.48228	None	None	0.629229
MEX3A	-1.07576	0.620286	0.810345	None	None	0.207408
LMNA	0.169234	0.403437	0.648437	None	None	0.394224
SEMA4A	-2.57728	0.0128855	0.0803302	None	axon guidance	1.8899
SLC25A44	0.390149	0.0923442	0.278693	None	None	1.03459
PMF1	0.522952	0.0201656	0.108065	None	None	1.69539
BGLAP	-4.79614	0.0112299	0.073045	None	learning or memory	1.94963
PAQR6	-4.99134	0.0024978	0.0250873	None	None	2.60244
SMG5	0.525416	0.00926796	0.0640316	None	None	2.03302
TMEM79	-0.587315	0.0648239	0.226521	None	None	1.18826
GLMP	0.530697	0.070772	0.23867	None	None	1.15014
CCT3	0.821306	0.000310219	0.00508037	None	None	3.50833
TSACC	0.0200487	0.964107	0.986982	None	None	0.0158749
RHBG	-0.169844	0.933963	0.974717	None	None	0.0296705
C1orf61	0.443832	0.242322	0.490516	None	None	0.615607
MEF2D	0.245514	0.279342	0.530614	None	None	0.553864
AL365181.1	NA	NA	NA	None	None	NA
IQGAP3	-0.25016	0.690255	0.853067	None	None	0.16099
NAXE	0.491559	0.236464	0.484499	None	None	0.626236
GPATCH4	0.396243	0.213449	0.454981	None	None	0.670707
HAPLN2	NA	NA	NA	None	None	NA
AL365181.2	-3.1829	0.421874	NA	None	None	0.374817
BCAN	-3.64451	0.355894	NA	None	None	0.44868
AL365181.3	-4.01931	0.267656	NA	None	None	0.572424
AL590666.2	-4.15766	0.290754	NA	None	None	0.536474
NES	-1.9468	0.629698	NA	None	None	0.200867
AL590666.3	NA	NA	NA	None	None	NA
AL590666.4	-5.14974	0.00300331	0.0287464	None	None	2.5224
CRABP2	-4.37387	0.265909	NA	None	None	0.575267
AL590666.1	NA	NA	NA	None	None	NA
ISG20L2	0.426766	0.0990499	0.29061	None	None	1.00415
RRNAD1	-0.0709851	0.781632	0.902446	None	None	0.106998
MRPL24	0.533968	0.180885	0.410883	None	None	0.742598
HDGF	0.393019	0.083363	0.262604	None	None	1.07903
PRCC	0.618186	0.00198517	0.021195	None	None	2.7022
AL590666.5	NA	NA	NA	None	None	NA
SH2D2A	-1.04853	0.797207	NA	None	None	0.0984286
NTRK1	NA	NA	NA	None	None	NA
PEAR1	NA	NA	NA	None	None	NA
LRRC71	NA	NA	NA	None	None	NA
ARHGEF11	0.128406	0.775269	0.89928	None	None	0.110548
ETV3L	NA	NA	NA	None	None	NA
ETV3	0.310629	0.17887	0.408053	None	None	0.747463
FCRL2	NA	NA	NA	None	None	NA
CD5L	NA	NA	NA	None	None	NA
KIRREL1	NA	NA	NA	None	None	NA
LINC01704	NA	NA	NA	None	None	NA
OR10K1	NA	NA	NA	None	None	NA
PYHIN1	NA	NA	NA	None	None	NA
IFI16	-0.247074	0.799612	0.911251	None	None	0.0971204
CFAP45	-6.47047	5.48528e-05	0.00130674	None	cilium or flagellum-dependent cell motility	4.2608
AL590560.5	-3.04768	0.442491	NA	None	None	0.354095
TAGLN2	-0.118402	0.804081	0.913415	None	None	0.0947002
IGSF9	-1.04853	0.797207	NA	None	axon guidance	0.0984286
LINC01133	NA	NA	NA	None	None	NA
KCNJ10	-3.64451	0.355894	NA	None	None	0.44868
PIGM	-0.285367	0.8325	0.929506	None	None	0.0796156
AL121987.1	NA	NA	NA	None	None	NA
KCNJ9	-1.04853	0.797207	NA	None	None	0.0984286
IGSF8	0.295338	0.544432	0.760695	None	None	0.264056
ATP1A2	NA	NA	NA	None	None	NA
CASQ1	-2.42796	0.543961	NA	None	None	0.264432
AL121987.2	-5.15544	0.0678187	0.233449	None	None	1.16865
PEA15	0.031551	0.91588	0.966859	None	None	0.0381612
DCAF8	0.0812274	0.723718	0.872939	None	None	0.140431
AL139011.1	-3.55308	0.17678	0.404824	None	None	0.752566
PEX19	-0.297387	0.535087	0.753582	None	None	0.271576
COPA	0.230757	0.221916	0.466533	None	None	0.653811
NCSTN	0.560385	0.044154	0.178596	None	None	1.35503
NHLH1	-1.04853	0.797207	NA	None	None	0.0984286
SLAMF6	NA	NA	NA	None	None	NA
CD84	NA	NA	NA	None	None	NA
AL121985.1	NA	NA	NA	None	None	NA
SLAMF7	NA	NA	NA	None	None	NA
LY9	NA	NA	NA	None	None	NA
AL354714.1	NA	NA	NA	None	None	NA
F11R	0.0613328	0.886043	0.954435	None	None	0.0525452
TSTD1	-0.695649	0.162995	0.386267	None	None	0.787825
USF1	-0.203809	0.627795	0.814996	None	None	0.202182
ARHGAP30	-0.832529	0.123075	0.328702	None	None	0.90983
NECTIN4	-1.62156	2.42277e-06	0.000102145	None	None	5.61569
AL591806.1	-4.37387	0.265909	NA	None	None	0.575267
KLHDC9	NA	NA	NA	None	None	NA
PFDN2	0.770045	0.0179783	0.0999169	None	None	1.74525
NIT1	-0.187039	0.527049	0.7487	None	None	0.278149
DEDD	0.0886612	0.692218	0.854037	None	None	0.159757
UFC1	0.445972	0.136017	0.348705	None	None	0.866408
AL590714.1	0.890275	0.359069	0.608524	None	None	0.444822
USP21	-0.0039967	0.993983	0.997781	None	None	0.00262097
PPOX	-0.37225	0.302815	0.555754	None	None	0.518823
B4GALT3	1.17829	1.94658e-05	0.000557498	None	None	4.71073
ADAMTS4	-1.04853	0.797207	NA	None	extracellular matrix organization	0.0984286
NDUFS2	-0.0330695	0.895886	0.958503	None	None	0.0477471
FCER1G	NA	NA	NA	None	None	NA
APOA2	NA	NA	NA	None	None	NA
TOMM40L	-0.0480004	0.975584	0.991149	None	None	0.0107351
NR1I3	-5.43807	0.0430758	0.175291	None	None	1.36577
PCP4L1	0.496695	0.354794	0.604404	None	None	0.450023
MPZ	-5.21244	0.0615629	0.219878	None	None	1.21068
SDHC	-0.049267	0.855774	0.940653	None	None	0.0676407
CFAP126	NA	NA	NA	None	None	NA
AL592295.4	-2.40604	0.124963	0.331497	None	None	0.903219
AL592295.5	-5.07332	0.021169	0.112017	None	None	1.6743
AL592295.3	-2.28564	0.249605	0.498797	None	None	0.602747
FCGR2A	-1.04853	0.797207	NA	None	None	0.0984286
HSPA6	NA	NA	NA	None	None	NA
FCGR2B	-3.22601	0.415421	NA	None	None	0.381511
FCRLB	-5.27959	0.0137589	0.0843542	None	None	1.86142
DUSP12	-0.0612675	0.831351	0.928853	None	None	0.0802155
AL359541.1	-1.04853	0.797207	NA	None	None	0.0984286
ATF6	0.538593	0.127545	0.335901	None	None	0.894335
NOS1AP	1.41859	0.00234208	0.0239074	None	None	2.6304
AL450163.1	-0.114587	0.941058	0.977116	None	None	0.0263836
C1orf226	NA	NA	NA	None	None	NA
SH2D1B	NA	NA	NA	None	None	NA
UHMK1	-0.141342	0.655444	0.831528	None	None	0.183465
AL596325.1	NA	NA	NA	None	None	NA
UAP1	0.279343	0.271187	0.521683	None	None	0.566731
AL596325.2	NA	NA	NA	None	None	NA
DDR2	0.600878	0.177448	0.406078	None	None	0.750929
HSD17B7	0.152553	0.505897	0.734476	None	None	0.295938
CCDC190	-1.9468	0.629698	NA	None	None	0.200867
RGS5	-0.491347	0.383801	0.630305	None	None	0.415894
AL499616.1	-1.87844	0.0665026	0.230348	None	None	1.17716
AL592435.1	-1.74108	0.28647	0.538233	None	None	0.542921
AL592435.2	NA	NA	NA	None	None	NA
NUF2	-1.00963	0.00568824	0.0452092	None	None	2.24502
PBX1	0.715727	0.122308	0.327312	None	None	0.912544
AL391001.1	NA	NA	NA	None	None	NA
AL357568.1	-3.73964	0.315706	NA	None	None	0.500717
AL357568.2	1.15347	0.572351	0.780975	None	None	0.242337
LRRC52-AS1	NA	NA	NA	None	None	NA
AL356441.1	-4.04602	0.00353917	0.0324212	None	None	2.4511
MGST3	0.0157347	0.931518	0.973735	None	None	0.0308087
ALDH9A1	-0.512149	0.116375	0.317325	None	None	0.934139
TMCO1	0.191147	0.5073	0.735747	None	None	0.294735
TMCO1-AS1	-1.78166	0.128102	0.336761	None	None	0.892444
UCK2	1.36598	6.66443e-06	0.000231012	None	None	5.17624
AL358115.1	0.801533	0.15686	0.378002	None	None	0.804489
FAM78B	NA	NA	NA	None	None	NA
AL596087.2	NA	NA	NA	None	None	NA
AL583804.1	NA	NA	NA	None	None	NA
POGK	-0.161825	0.609728	0.80432	None	None	0.214864
TADA1	-0.0427998	0.911825	0.96473	None	None	0.0400885
ILDR2	-0.141406	0.887523	0.955117	None	None	0.0518203
MAEL	NA	NA	NA	None	None	NA
GPA33	-0.139163	0.707401	0.863311	None	None	0.150334
DUSP27	0.346531	0.787116	0.90482	None	None	0.103961
LINC01363	-1.04853	0.797207	NA	None	None	0.0984286
AL451050.2	0.136842	0.777796	0.900656	None	None	0.109134
POU2F1	0.52852	0.0549001	0.204749	None	None	1.26043
AL136984.1	-0.0867571	0.983037	NA	None	None	0.00743012
CD247	-0.0992605	0.929101	0.972666	None	None	0.0319373
AL359962.3	NA	NA	NA	None	None	NA
CREG1	0.220623	0.579642	0.785082	None	None	0.23684
RCSD1	-2.10063	0.264536	0.514016	None	None	0.577515
MPZL1	0.580737	0.0560799	0.207484	None	None	1.25119
ADCY10	-0.0853192	0.831461	0.928862	None	None	0.0801579
Z99943.1	NA	NA	NA	None	None	NA
MPC2	0.0287744	0.931494	0.973735	None	None	0.0308197
DCAF6	0.256528	0.456262	0.693649	None	None	0.340786
GPR161	-2.95951	0.306801	NA	None	None	0.513143
TIPRL	-0.396653	0.259664	0.508635	None	None	0.585588
SFT2D2	0.22569	0.499248	0.729582	None	None	0.301684
TBX19	0.0952067	0.893515	0.957449	None	None	0.0488981
AL023755.1	-0.506262	0.397074	0.6429	None	None	0.401129
XCL2	NA	NA	NA	None	None	NA
XCL1	-5.15815	0.0220913	0.114926	None	None	1.65578
DPT	NA	NA	NA	None	None	NA
LINC00970	-3.11496	0.144499	0.36058	None	None	0.840136
AL031726.1	NA	NA	NA	None	None	NA
NME7	0.793176	0.34768	0.598437	None	None	0.458821
Z99758.1	-0.542179	0.794193	0.908683	None	None	0.100074
BLZF1	-0.490358	0.0972346	0.287564	None	None	1.01218
CCDC181	-0.00128158	0.997372	0.999411	None	None	0.00114298
SLC19A2	0.993835	0.000865704	0.0113975	None	None	3.06263
Z99572.1	0.141001	0.722042	0.871846	None	None	0.141438
F5	-0.571151	0.5172	0.743091	None	None	0.286341
SELP	-1.04853	0.797207	NA	None	None	0.0984286
C1orf112	0.138554	0.648729	0.827352	None	None	0.187937
SELE	NA	NA	NA	None	None	NA
METTL18	-0.771628	0.168348	0.394031	None	None	0.773793
SCYL3	0.412659	0.0465152	0.184605	None	None	1.3324
KIFAP3	-0.0151981	0.975565	0.991149	None	None	0.0107437
METTL11B	NA	NA	NA	None	None	NA
LINC01681	NA	NA	NA	None	None	NA
GORAB-AS1	-1.94612	0.629823	NA	None	None	0.200781
GORAB	-0.16055	0.61224	0.805256	None	None	0.213078
AL023495.1	NA	NA	NA	None	None	NA
PRRX1	NA	NA	NA	None	None	NA
BX284613.2	-0.418943	0.417307	0.660853	None	None	0.379545
MROH9	-1.74648	0.21749	0.460348	None	None	0.66256
FMO3	-2.04121	0.612463	NA	None	None	0.21292
FMO2	NA	NA	NA	None	None	NA
FMO1	-3.78066	0.0151282	0.0897446	None	None	1.82021
FMO4	-0.983048	0.156164	0.376877	None	None	0.806418
PRRC2C	0.416429	0.0420366	0.172701	None	None	1.37637
MYOCOS	0.146442	0.865393	0.944591	None	None	0.0627865
VAMP4	-0.733639	0.029278	0.137472	None	None	1.53346
EEF1AKNMT	-0.297354	0.337327	0.588415	None	None	0.471949
DNM3	-0.00652885	0.989247	0.995902	None	None	0.00469514
DNM3OS	NA	NA	NA	None	None	NA
PIGC	-0.862016	0.0247144	0.123957	None	None	1.60705
C1orf105	-3.33903	0.0301389	0.13992	None	None	1.52087
SUCO	-0.0347324	0.906776	0.962491	None	None	0.0425
[truncated: 27,066 more rows]

## Sheet: STB3
gene name	log2FoldChange	pvalue	padj	GotermSTBout	GotermSTBin	pvalue_transformed
SCNN1D	1.4152	0.410292	0.659529	sodium ion transport	None	0.386907
NKAIN1	1.55595	0.321226	0.575878	sodium ion transport	None	0.493189
SLC6A9	1.17779	0.162127	0.39097	sodium ion transport	None	0.790144
ATP1A1	1.30552	0.000766459	0.0114846	sodium ion transport	None	3.11551
ATP1B1	1.3213	0.013342	0.0845428	sodium ion transport	None	1.87478
SLC5A6	1.21557	2.0666e-07	1.9033e-05	sodium ion transport	None	6.68474
PRKCE	1.55808	0.000132239	0.00306729	sodium ion transport	None	3.87864
SLC38A3	2.13176	0.0034744	0.0342661	sodium ion transport	None	2.45912
SLC4A4	1.76827	0.0175279	0.100616	sodium ion transport	None	1.75627
SLC6A3	3.70149	0.0132975	0.0843583	sodium ion transport	None	1.87623
SLC22A4	1.14682	0.00742655	0.0571376	sodium ion transport	None	2.12921
ADRB2	1.27665	0.515521	0.743286	sodium ion transport	None	0.287754
SLC24A2	1.25344	0.0663489	0.230792	sodium ion transport	None	1.17817
KCNE3	1.85377	0.43874	NA	sodium ion transport	None	0.357793
SLC38A2	1.07653	0.00498989	0.0438014	sodium ion transport	None	2.30191
SLC6A15	2.13272	0.1765	0.409836	sodium ion transport	None	0.753255
SLC17A8	2.17349	0.328561	0.583663	sodium ion transport	None	0.483385
EDNRB	1.82709	0.000506582	0.00834883	sodium ion transport	None	3.29535
NALCN	2.28463	0.00330274	0.0330767	sodium ion transport	None	2.48113
SLC12A3	1.02509	0.691988	NA	sodium ion transport	None	0.159902
SCN4A	1.59993	0.622804	NA	sodium ion transport	None	0.205649
FXYD5	1.0852	0.00575151	0.0485878	sodium ion transport	None	2.24022
SLC24A3	1.65095	7.00748e-05	0.00187012	sodium ion transport	None	4.15444
DRAXIN	-3.99999	0.315837	NA	None	axon guidance	0.500538
EPHA10	-1.56429	0.621034	NA	None	axon guidance	0.206885
ARTN	-2.39396	0.557413	NA	None	axon guidance	0.253823
SEMA6C	-5.48656	1.44572e-06	9.08435e-05	None	axon guidance	5.83992
EFNA3	-4.9919	0.151125	0.377218	None	axon guidance	0.820665
EFNA1	-1.0756	0.00287968	0.0300241	None	axon guidance	2.54066
SEMA4A	-2.86896	0.00657478	0.0531528	None	axon guidance	2.18212
LGR6	-2.39396	0.557413	NA	None	axon guidance	0.253823
CNTN2	-2.73064	0.0279355	0.136042	None	axon guidance	1.55384
GDF7	-4.73074	0.19695	NA	None	axon guidance	0.705643
SEMA4C	-1.49419	0.00083185	0.0121814	None	axon guidance	3.07996
KIF5C	-1.09422	0.695042	0.85517	None	axon guidance	0.157989
BOC	-1.92366	0.373054	0.62723	None	axon guidance	0.428228
EPHA5	-5.85749	0.0102175	0.0707057	None	axon guidance	1.99066
UNC5C	-2.95206	0.0599511	0.217959	None	axon guidance	1.2222
PALLD	-1.11965	0.050166	0.195058	None	axon guidance	1.29959
ISL1	-1.87407	0.240213	0.48903	None	axon guidance	0.619403
FOXD1	-3.26972	0.125357	0.339835	None	axon guidance	0.90185
MYOT	-5.15944	0.0507861	0.196452	None	axon guidance	1.29426
SLIT3	-3.10682	0.0895854	0.276831	None	axon guidance	1.04776
UNC5A	-3.40999	0.397246	NA	None	axon guidance	0.400941
TUBB2B	-7.60322	0.00154448	0.0189535	None	axon guidance	2.81122
PTK7	-6.02696	9.20973e-05	0.00228848	None	axon guidance	4.03575
SMO	-3.65929	0.199747	0.439341	None	axon guidance	0.69952
PLXNA4	-5.59474	0.0157629	0.0936015	None	axon guidance	1.80236
GBX1	-2.39396	0.557413	NA	None	axon guidance	0.253823
UNC5D	-5.7256	0.0637831	0.224939	None	axon guidance	1.19529
LHX2	-6.07755	0.00667253	0.0535741	None	axon guidance	2.17571
PRKCQ	-5.22858	0.184668	0.420671	None	axon guidance	0.733608
RET	-3.40999	0.397246	NA	None	axon guidance	0.400941
EGR2	-2.77473	0.0216286	0.115086	None	axon guidance	1.66497
SLIT1	-1.71664	0.576879	NA	None	axon guidance	0.238915
BDNF	-1.36073	0.545421	0.763135	None	axon guidance	0.263268
KIF5A	-1.99314	0.464342	0.704349	None	axon guidance	0.333162
ARHGEF40	-2.88871	0.155341	0.381908	None	axon guidance	0.808714
ISL2	-3.21915	0.107042	0.309069	None	axon guidance	0.970444
SEMA4B	-1.39667	8.39913e-08	9.22824e-06	None	axon guidance	7.07577
PLA2G10	-1.60231	0.384127	0.63733	None	axon guidance	0.415526
CDK5R1	-2.59584	0.133661	0.352898	None	axon guidance	0.873995
WNT3	-2.17456	0.14741	0.371923	None	axon guidance	0.831474
NGFR	-2.39396	0.557413	NA	None	axon guidance	0.253823
NOG	-5.86808	0.047542	0.189547	None	axon guidance	1.32292
DCC	-1.41104	0.0226348	0.118363	None	axon guidance	1.64522
EFNA2	-5.12874	0.118843	0.329422	None	axon guidance	0.925027
NOTCH3	-1.26959	0.00590032	0.0494007	None	axon guidance	2.22912
ANOS1	-5.53582	0.02019	0.110347	None	axon guidance	1.69486
ARX	-2.39396	0.557413	NA	None	axon guidance	0.253823
EFNB1	-1.76013	0.000903704	0.0129823	None	axon guidance	3.04397
EPHB6	-2.39396	0.557413	NA	None	axon guidance	0.253823
ANGPTL7	-1.03988	0.580577	0.784344	None	extracellular matrix organization	0.23614
MATN1	-2.67599	0.116547	0.325894	None	extracellular matrix organization	0.9335
COL16A1	-2.80788	0.31345	0.567688	None	extracellular matrix organization	0.503832
COL8A2	-4.41897	0.0918635	0.281409	None	extracellular matrix organization	1.03686
COL9A2	-1.18772	NA	NA	None	extracellular matrix organization	NA
TIE1	-4.39448	0.268158	NA	None	extracellular matrix organization	0.571609
COL24A1	-1.43213	0.695986	0.855648	None	extracellular matrix organization	0.157399
ADAMTS4	-2.39396	0.557413	NA	None	extracellular matrix organization	0.253823
COLGALT2	-2.46765	0.539849	NA	None	extracellular matrix organization	0.267728
PXDN	-4.74124	0.230663	NA	None	extracellular matrix organization	0.637021
MATN3	-2.39396	0.557413	NA	None	extracellular matrix organization	0.253823
EMILIN1	-1.39648	0.731867	NA	None	extracellular matrix organization	0.135568
VIT	-7.35464	1.26206e-05	0.000486855	None	extracellular matrix organization	4.89892
CYP1B1	-3.5391	0.00194481	0.0226529	None	extracellular matrix organization	2.71112
DPP4	-1.08734	0.0114542	0.0766934	None	extracellular matrix organization	1.94104
FAP	-1.09569	0.123515	0.337011	None	extracellular matrix organization	0.90828
COL4A4	-6.64839	0.000215941	0.00446149	None	extracellular matrix organization	3.66567
COL8A1	-1.24996	0.31862	0.57387	None	extracellular matrix organization	0.496727
CCDC80	-1.12745	0.568969	0.776536	None	extracellular matrix organization	0.244911
NPNT	-1.79506	0.00595869	0.0497122	None	extracellular matrix organization	2.22485
RXFP1	-4.41767	0.265523	NA	None	extracellular matrix organization	0.575898
ADAMTS16	-5.52271	0.076827	0.252524	None	extracellular matrix organization	1.11449
EGFLAM	-3.18033	0.00464826	0.0419661	None	extracellular matrix organization	2.33271
MARCOL	-4.21721	0.118795	0.329387	None	extracellular matrix organization	0.9252
COL23A1	-4.07307	0.000894805	0.0128923	None	extracellular matrix organization	3.04827
ADTRP	-3.38824	0.400475	NA	None	extracellular matrix organization	0.397424
COL19A1	-6.04528	0.00666029	0.0535674	None	extracellular matrix organization	2.17651
FSCN1	-1.53405	0.0868255	0.270841	None	extracellular matrix organization	1.06135
LOXL2	-1.25558	0.0864724	0.270054	None	extracellular matrix organization	1.06312
SULF1	-2.39396	0.557413	NA	None	extracellular matrix organization	0.253823
MMP16	-2.39396	0.557413	NA	None	extracellular matrix organization	0.253823
SCX	-5.46588	6.60359e-09	1.0354e-06	None	extracellular matrix organization	8.18022
COL15A1	-2.08969	0.477293	NA	None	extracellular matrix organization	0.321215
TGFBR1	-1.67871	0.00535325	0.0460517	None	extracellular matrix organization	2.27138
OLFML2A	-2.4447	0.208527	0.450634	None	extracellular matrix organization	0.680837
ADAMTS13	-4.3561	3.068e-05	0.000968538	None	extracellular matrix organization	4.51314
ITGA8	-5.36472	0.0231807	0.120209	None	extracellular matrix organization	1.63487
LOXL4	-4.9043	1.39735e-05	0.000522473	None	extracellular matrix organization	4.85469
HPSE2	-3.42289	0.0839542	0.265279	None	extracellular matrix organization	1.07596
KAZALD1	-2.39396	0.557413	NA	None	extracellular matrix organization	0.253823
COL17A1	-2.18416	1.45793e-07	1.44167e-05	None	extracellular matrix organization	6.83626
GAS2	-1.89544	0.000380676	0.00671869	None	extracellular matrix organization	3.41944
EFEMP2	-5.88298	2.52499e-05	0.000820754	None	extracellular matrix organization	4.59774
MMP12	-4.34648	0.197529	0.436607	None	extracellular matrix organization	0.70437
MANSC4	-3.35033	0.00263343	0.0282725	None	extracellular matrix organization	2.57948
PRICKLE1	-1.57838	0.237544	0.485528	None	extracellular matrix organization	0.624256
MMP17	-2.13014	0.145649	0.369881	None	extracellular matrix organization	0.836692
RGCC	-1.91019	0.00072901	0.0110725	None	extracellular matrix organization	3.13727
CPB2	-2.90083	0.00681914	0.0544025	None	extracellular matrix organization	2.16627
GREM1	-2.99071	0.0666851	0.231714	None	extracellular matrix organization	1.17597
ADAMTS7	-1.719	0.562995	0.773666	None	extracellular matrix organization	0.249495
ADAMTSL3	-5.59345	0.0156824	0.0933767	None	extracellular matrix organization	1.80459
MMP25	-5.73019	0.0605543	0.218819	None	extracellular matrix organization	1.21785
MYH11	-1.29191	0.324335	0.579295	None	extracellular matrix organization	0.489006
CARMIL2	-3.89144	0.329907	NA	None	extracellular matrix organization	0.481608
GFOD2	-1.19191	4.53034e-05	0.00132168	None	extracellular matrix organization	4.34387
SMPD3	-3.44804	0.0586364	0.214799	None	extracellular matrix organization	1.23183
HAS3	-4.87333	0.0523127	0.199766	None	extracellular matrix organization	1.28139
ADAMTS18	-2.71533	0.366694	NA	None	extracellular matrix organization	0.435697
CRISPLD2	-1.26412	0.0157031	0.0933933	None	extracellular matrix organization	1.80402
SERPINF2	-3.38825	0.133909	0.353355	None	extracellular matrix organization	0.87319
MMP28	-1.93527	0.622681	NA	None	extracellular matrix organization	0.205734
FKBP10	-2.51889	0.183858	0.420614	None	extracellular matrix organization	0.735517
SOX9	-1.44351	0.596308	0.79511	None	extracellular matrix organization	0.224529
ADAMTSL5	-4.84349	0.0278481	0.135793	None	extracellular matrix organization	1.5552
ADAMTS10	-4.58214	0.0310319	0.14514	None	extracellular matrix organization	1.50819
HAS1	-5.58476	0.0810548	0.260095	None	extracellular matrix organization	1.09122
SULF2	-2.05753	1.87779e-08	2.4845e-06	None	extracellular matrix organization	7.72635
ADAMTS5	-4.74363	1.66451e-05	0.000593412	None	extracellular matrix organization	4.77871
MMP11	-2.33574	2.82352e-06	0.000152877	None	extracellular matrix organization	5.54921
TMPRSS6	-5.21679	0.0167906	0.0976362	None	extracellular matrix organization	1.77493
CHADL	-1.55186	0.270641	0.523949	None	extracellular matrix organization	0.567607
EGFL6	-2.39396	0.557413	NA	None	extracellular matrix organization	0.253823
AL627309.1	NA	NA	NA	None	None	NA
AL627309.5	0.644798	0.205395	0.447105	None	None	0.68741
AL627309.4	NA	NA	NA	None	None	NA
AP006222.2	-2.97981	0.454509	NA	None	None	0.342458
AC114498.1	-2.42869	0.226831	0.472211	None	None	0.644297
AL669831.2	-5.83097	0.0118792	0.078642	None	None	1.92521
LINC01409	0.0445459	0.883108	0.949449	None	None	0.0539861
FAM87B	-3.99804	0.144633	0.368605	None	None	0.839733
LINC01128	0.447925	0.160013	0.388513	None	None	0.795846
LINC00115	-0.181491	0.665467	0.839226	None	None	0.176874
FAM41C	NA	NA	NA	None	None	NA
AL645608.6	NA	NA	NA	None	None	NA
AL645608.2	NA	NA	NA	None	None	NA
SAMD11	NA	NA	NA	None	None	NA
NOC2L	-0.00212832	0.993506	0.996476	None	None	0.00282939
KLHL17	-6.46547	0.000454955	0.00767987	None	None	3.34203
PLEKHN1	-0.612939	0.345492	0.600361	None	None	0.461562
PERM1	-2.39396	0.557413	NA	None	None	0.253823
AL645608.7	NA	NA	NA	None	None	NA
HES4	0.0497403	0.935795	0.973086	None	None	0.0288192
ISG15	0.385959	0.462062	0.702705	None	None	0.3353
AL645608.1	-3.99999	0.315837	NA	None	None	0.500538
AGRN	-0.21261	0.748736	0.885045	None	None	0.125671
RNF223	-1.74001	0.138328	0.359891	None	None	0.85909
C1orf159	-0.178815	0.597425	0.795663	None	None	0.223717
AL390719.3	-0.359101	0.440151	0.684623	None	None	0.356398
TTLL10	NA	NA	NA	None	None	NA
SDF4	0.136837	0.502981	0.734153	None	None	0.298448
B3GALT6	0.801631	0.397405	0.648523	None	None	0.400766
C1QTNF12	-5.45197	0.00108883	0.0147704	None	None	2.96304
AL162741.1	NA	NA	NA	None	None	NA
UBE2J2	0.158955	0.326547	0.581532	None	None	0.486054
LINC01786	NA	NA	NA	None	None	NA
ACAP3	-0.0424242	0.838326	0.929725	None	None	0.076587
PUSL1	0.398485	0.35354	0.607603	None	None	0.451561
INTS11	0.0682376	0.749137	0.885151	None	None	0.125439
CPTP	0.952136	0.0489029	0.193239	None	None	1.31067
TAS1R3	NA	NA	NA	None	None	NA
DVL1	0.228261	0.43722	0.682506	None	None	0.3593
MXRA8	-0.211226	0.859741	0.939584	None	None	0.0656324
AURKAIP1	0.419928	0.0774664	0.253375	None	None	1.11089
CCNL2	-0.470624	0.0593293	0.2164	None	None	1.22673
MRPL20-AS1	0.474821	0.191584	0.42938	None	None	0.71764
MRPL20	0.369755	0.0186645	0.104552	None	None	1.72898
AL391244.2	-0.216902	0.901073	0.957406	None	None	0.0452401
ANKRD65	-6.09935	0.0400768	0.171283	None	None	1.39711
AL391244.1	NA	NA	NA	None	None	NA
LINC01770	-3.40999	0.397246	NA	None	None	0.400941
VWA1	-0.104901	0.726756	0.872895	None	None	0.138611
ATAD3C	-0.0841091	0.897637	0.955459	None	None	0.0468991
ATAD3B	0.337285	0.0813955	0.260719	None	None	1.0894
ATAD3A	0.346665	0.19409	0.432159	None	None	0.711998
TMEM240	-5.73258	0.0610615	0.219943	None	None	1.21423
SSU72	0.26243	0.15067	0.377027	None	None	0.821973
AL645728.1	-0.611379	0.223304	0.468454	None	None	0.651104
FNDC10	-2.39396	0.557413	NA	None	None	0.253823
AL691432.4	-4.41767	0.265523	NA	None	None	0.575898
AL691432.2	0.0085442	0.982599	0.993011	None	None	0.00762381
MIB2	-0.740207	1.22925e-05	0.000479559	None	None	4.91036
MMP23B	0.15502	0.929504	0.970762	None	None	0.0317487
CDK11B	0.143412	0.460126	0.701257	None	None	0.337123
FO704657.1	-4.75029	0.00561422	0.0477717	None	None	2.25071
SLC35E2B	-0.0244705	0.911397	0.962706	None	None	0.0402926
CDK11A	-0.142912	0.606928	0.801891	None	None	0.216863
SLC35E2A	-0.514882	0.36859	0.622968	None	None	0.433456
NADK	0.241816	0.389422	0.642442	None	None	0.40958
GNB1	-0.308743	0.10831	0.311627	None	None	0.965333
AL109917.1	NA	NA	NA	None	None	NA
CALML6	NA	NA	NA	None	None	NA
TMEM52	-2.93942	0.215505	0.45906	None	None	0.666542
CFAP74	0.176385	0.789805	0.905103	None	None	0.10248
AL391845.2	NA	NA	NA	None	None	NA
GABRD	NA	NA	NA	None	None	NA
AL391845.1	NA	NA	NA	None	None	NA
PRKCZ	0.2943	0.00876944	0.0636878	None	None	2.05703
AL590822.2	-0.17762	0.581588	0.784774	None	None	0.235384
PRKCZ-AS1	-0.896211	0.555598	0.769593	None	None	0.255239
FAAP20	-0.962939	0.000189063	0.00405494	None	None	3.72339
AL590822.1	-2.81588	0.154194	0.38089	None	None	0.811932
SKI	0.215431	0.405366	0.655494	None	None	0.392152
AL590822.3	-0.434706	0.915059	NA	None	None	0.0385511
MORN1	-0.272101	0.43035	0.677235	None	None	0.366178
AL513477.2	NA	NA	NA	None	None	NA
RER1	-0.0917725	0.630402	0.816827	None	None	0.200383
PEX10	-0.328168	0.0607787	0.219387	None	None	1.21625
PANK4	-0.202861	0.425765	0.672944	None	None	0.37083
AL139246.5	0.169616	0.767094	0.893611	None	None	0.115151
TNFRSF14-AS1	NA	NA	NA	None	None	NA
TNFRSF14	-2.39396	0.557413	NA	None	None	0.253823
PRXL2B	NA	NA	NA	None	None	NA
TTC34	NA	NA	NA	None	None	NA
PRDM16	NA	NA	NA	None	None	NA
ARHGEF16	0.470127	0.458893	0.699982	None	None	0.338289
AL512413.1	NA	NA	NA	None	None	NA
MEGF6	-4.21719	0.120002	0.331461	None	None	0.920812
AL513320.1	NA	NA	NA	None	None	NA
TPRG1L	0.438094	0.363812	0.61809	None	None	0.439123
WRAP73	0.887999	0.0242301	0.124144	None	None	1.61565
TP73	2.34453	0.0618377	0.221002	None	None	1.20875
AL136528.1	2.50227	0.21652	0.460348	None	None	0.664502
CCDC27	NA	NA	NA	None	None	NA
SMIM1	-3.34386	0.228193	0.473943	None	None	0.641698
LRRC47	-0.0255724	0.914702	0.964227	None	None	0.0387204
CEP104	-0.725325	0.0777153	0.253801	None	None	1.10949
DFFB	-1.12317	0.0753588	0.250261	None	None	1.12287
C1orf174	0.0529389	0.871204	0.943967	None	None	0.0598802
LINC01134	-0.752913	0.63	0.816613	None	None	0.20066
LINC02780	NA	NA	NA	None	None	NA
AL805961.1	NA	NA	NA	None	None	NA
AJAP1	NA	NA	NA	None	None	NA
Z98886.1	NA	NA	NA	None	None	NA
AL365255.1	NA	NA	NA	None	None	NA
NPHP4	0.0234702	0.98645	0.9942	None	None	0.0059247
KCNAB2	-0.684159	0.856145	0.937751	None	None	0.0674529
CHD5	NA	NA	NA	None	None	NA
RPL22	-0.00659655	0.977267	0.990468	None	None	0.00998667
RNF207	-0.136228	0.692987	0.853853	None	None	0.159275
ICMT	0.456897	0.0373034	0.163595	None	None	1.42825
LINC00337	-0.0618765	0.905007	0.959174	None	None	0.0433479
GPR153	-2.34184	0.0544953	0.20547	None	None	1.26364
ACOT7	0.617932	0.04472	0.182573	None	None	1.3495
AL031848.2	0.843989	0.619211	0.810714	None	None	0.208161
HES2	0.553797	0.0234121	0.121109	None	None	1.63056
ESPN	1.11711	0.00747678	0.0573831	None	None	2.12629
AL031848.1	NA	NA	NA	None	None	NA
TNFRSF25	-1.1747	0.0104274	0.0715375	None	None	1.98182
PLEKHG5	-0.0156742	0.979598	0.991402	None	None	0.00895193
NOL9	0.421505	0.0766311	0.252356	None	None	1.11559
TAS1R1	-0.732628	0.68875	0.851836	None	None	0.161938
ZBTB48	-0.275964	0.38864	0.641801	None	None	0.410452
KLHL21	0.369233	0.270167	0.523555	None	None	0.568368
PHF13	0.535763	0.111465	0.317063	None	None	0.952862
THAP3	0.080582	0.809064	0.915428	None	None	0.0920174
DNAJC11	0.783761	2.03726e-05	0.000695768	None	None	4.69095
LINC01672	NA	NA	NA	None	None	NA
AL591163.1	-5.87843	0.0659398	0.229904	None	None	1.18085
CAMTA1-DT	-0.147679	0.760447	0.890217	None	None	0.118931
CAMTA1	0.187181	0.383614	0.636907	None	None	0.416106
AL512330.1	-5.20984	0.123071	0.336295	None	None	0.909845
Z97987.1	-4.74124	0.230663	NA	None	None	0.637021
VAMP3	-0.266454	0.294699	0.548632	None	None	0.530622
Z98884.2	NA	NA	NA	None	None	NA
PER3	-0.977783	0.341262	0.595877	None	None	0.466912
Z98884.1	NA	NA	NA	None	None	NA
UTS2	NA	NA	NA	None	None	NA
TNFRSF9	-0.434706	0.915059	NA	None	None	0.0385511
PARK7	0.32845	0.0496331	0.194204	None	None	1.30423
AL034417.4	-1.28687	0.0462441	0.186126	None	None	1.33494
AL034417.3	-1.24089	0.0917464	0.281409	None	None	1.03741
ERRFI1	-0.689061	0.0388571	0.167827	None	None	1.41053
AL034417.2	-2.53	2.40151e-05	0.00078766	None	None	4.61952
LINC01714	-2.7335	0.0259698	0.129353	None	None	1.58553
SLC45A1	-5.86477	1.06959e-07	1.11641e-05	None	None	6.97078
RERE	-0.0504019	0.676559	0.845891	None	None	0.169694
RERE-AS1	-0.799283	0.045835	0.185416	None	None	1.3388
AL357552.2	NA	NA	NA	None	None	NA
ENO1	0.412681	0.0719761	0.243743	None	None	1.14281
ENO1-AS1	NA	NA	NA	None	None	NA
CA6	NA	NA	NA	None	None	NA
SLC2A7	-4.7261	0.197692	NA	None	None	0.704011
SLC2A5	-0.096889	0.933456	0.972322	None	None	0.0299062
GPR157	0.623131	0.000186385	0.00401123	None	None	3.72959
MIR34AHG	0.380567	0.0586501	0.214799	None	None	1.23173
LNCTAM34A	0.123614	0.793163	0.90661	None	None	0.100638
H6PD	-0.775895	0.267469	0.520453	None	None	0.572726
SPSB1	1.20645	5.69857e-05	0.00159323	None	None	4.24423
LINC02606	NA	NA	NA	None	None	NA
SLC25A33	0.229716	0.162052	0.390888	None	None	0.790346
TMEM201	0.935712	0.0982073	0.292923	None	None	1.00786
PIK3CD	0.912879	0.214934	0.458622	None	None	0.667695
PIK3CD-AS2	-0.708897	0.509475	0.738483	None	None	0.292877
CLSTN1	0.259474	0.378016	0.631584	None	None	0.42249
CTNNBIP1	-0.471755	0.278726	0.532077	None	None	0.554823
AL357140.1	NA	NA	NA	None	None	NA
AL357140.4	-2.14219	0.0293288	0.14014	None	None	1.53271
LZIC	-0.141566	0.553328	0.768986	None	None	0.257017
AL357140.2	NA	NA	NA	None	None	NA
NMNAT1	0.203873	0.352094	0.606783	None	None	0.453341
RBP7	-1.90964	0.633655	NA	None	None	0.198147
UBE4B	0.243833	0.25004	0.500036	None	None	0.601991
KIF1B	-0.132311	0.373148	0.627244	None	None	0.428119
AL139424.3	-1.59691	0.298056	0.551603	None	None	0.525703
AL139424.2	-5.87586	0.0568196	0.210599	None	None	1.2455
PGD	0.378605	0.098828	0.29398	None	None	1.00512
AL139424.1	NA	NA	NA	None	None	NA
CENPS	-0.0170215	0.980611	0.991676	None	None	0.00850332
CORT	-4.40031	0.267494	NA	None	None	0.572686
DFFA	0.309184	0.306371	0.559932	None	None	0.513752
AL354956.1	NA	NA	NA	None	None	NA
PEX14	0.187811	0.431112	0.677659	None	None	0.36541
AL139423.2	-3.57799	0.00383287	0.0364618	None	None	2.41648
CASZ1	-0.776041	0.390011	0.643105	None	None	0.408923
AL139423.1	NA	NA	NA	None	None	NA
C1orf127	NA	NA	NA	None	None	NA
TARDBP	0.203496	0.312042	0.566572	None	None	0.505787
MASP2	-1.95555	0.107874	0.310752	None	None	0.967085
AL109811.2	-0.369567	0.370761	0.625021	None	None	0.430906
SRM	1.24749	0.0039597	0.0372888	None	None	2.40234
EXOSC10	0.165673	0.440715	0.684989	None	None	0.355842
AL109811.1	0.14398	0.661828	0.837166	None	None	0.179255
EXOSC10-AS1	NA	NA	NA	None	None	NA
MTOR	0.633313	0.000947413	0.0133639	None	None	3.02346
MTOR-AS1	-4.01149	0.0793879	0.25694	None	None	1.10025
UBIAD1	0.535679	0.0877567	0.2729	None	None	1.05672
AL031291.1	NA	NA	NA	None	None	NA
DISP3	NA	NA	NA	None	None	NA
LINC01647	NA	NA	NA	None	None	NA
AL031731.1	NA	NA	NA	None	None	NA
FBXO2	NA	NA	NA	None	None	NA
FBXO44	-1.08069	0.434244	0.680279	None	None	0.362266
FBXO6	-1.50805	0.25567	0.506487	None	None	0.59232
MAD2L2	-0.318516	0.862966	0.940889	None	None	0.0640064
AGTRAP	0.0274178	0.935123	0.972817	None	None	0.0291313
C1orf167	NA	NA	NA	None	None	NA
MTHFR	-0.192842	0.565156	0.77484	None	None	0.247832
CLCN6	0.113933	0.527491	0.752041	None	None	0.277785
NPPA	-0.990148	0.0970458	0.290334	None	None	1.01302
NPPB	-3.04941	0.0247144	0.125259	None	None	1.60705
AL021155.5	-4.2774	1.06333e-06	6.98524e-05	None	None	5.97333
KIAA2013	0.0730422	0.764166	0.892414	None	None	0.116812
PLOD1	0.342244	0.166179	0.395552	None	None	0.779424
AL096840.2	-4.92983	0.0688648	NA	None	None	1.162
MFN2	0.382525	0.0738306	0.247702	None	None	1.13176
MIIP	0.179537	0.401596	0.65219	None	None	0.396211
TNFRSF8	-0.337471	0.651911	0.830679	None	None	0.185812
TNFRSF1B	0.780597	0.00045857	0.00771871	None	None	3.33859
VPS13D	0.261992	0.140697	0.363639	None	None	0.851715
DHRS3	-0.421792	0.605514	0.800704	None	None	0.217876
C1orf158	NA	NA	NA	None	None	NA
PRAMEF18	-2.39396	0.557413	NA	None	None	0.253823
LRRC38	NA	NA	NA	None	None	NA
PDPN	NA	NA	NA	None	None	NA
PRDM2	-0.0329997	0.839005	0.930148	None	None	0.0762355
KAZN	0.255999	0.0790722	0.256456	None	None	1.10198
AL357873.1	-1.47677	0.000990055	0.0137888	None	None	3.00434
KAZN-AS1	-1.35793	0.0143804	0.0884753	None	None	1.84223
AL031293.1	-2.46765	0.539849	NA	None	None	0.267728
TMEM51-AS1	-1.32197	0.342425	0.597242	None	None	0.465434
TMEM51	0.438963	0.11405	0.321755	None	None	0.942904
C1orf195	-3.12563	4.95902e-05	0.00142462	None	None	4.3046
FHAD1	-0.376452	0.437799	0.6831	None	None	0.358725
AL031283.2	NA	NA	NA	None	None	NA
AL031283.1	-3.9773	0.318744	NA	None	None	0.496559
EFHD2	-0.324235	0.261036	0.512837	None	None	0.583299
CTRC	-4.05089	0.15704	0.383977	None	None	0.803989
CELA2A	-6.81417	0.000494119	0.00819373	None	None	3.30617
CELA2B	-3.39503	0.00132989	0.0170204	None	None	2.87618
CASP9	-1.01786	1.72204e-06	0.000104031	None	None	5.76396
DNAJC16	-0.126513	0.582284	0.785183	None	None	0.234865
AGMAT	-1.00561	0.0231528	0.120198	None	None	1.6354
AL121992.1	-2.37378	0.18093	0.416582	None	None	0.74249
DDI2	-0.279979	0.225648	0.470635	None	None	0.646568
PLEKHM2	-0.262791	0.312203	0.566676	None	None	0.505563
AL450998.3	-0.901503	0.0741632	0.248248	None	None	1.12981
SLC25A34	-6.74045	2.1231e-06	0.000123495	None	None	5.67303
SLC25A34-AS1	NA	NA	NA	None	None	NA
TMEM82	NA	NA	NA	None	None	NA
FBLIM1	0.586003	0.139781	0.362136	None	None	0.854551
UQCRHL	NA	NA	NA	None	None	NA
AL450998.2	-0.227308	0.527661	0.752041	None	None	0.277645
SPEN	0.594018	0.000947452	0.0133639	None	None	3.02344
ZBTB17	0.022022	0.915295	0.964448	None	None	0.0384389
HSPB7	-3.23894	0.423071	NA	None	None	0.373586
EPHA2	0.371268	0.322472	0.577065	None	None	0.491508
AL451042.2	NA	NA	NA	None	None	NA
AL451042.1	-3.38824	0.400475	NA	None	None	0.397424
ARHGEF19	-1.90964	0.633655	NA	None	None	0.198147
AL109627.1	NA	NA	NA	None	None	NA
CPLANE2	-4.41767	0.265523	NA	None	None	0.575898
FBXO42	0.0380103	0.799377	0.910356	None	None	0.0972483
SZRD1	0.195975	0.352948	0.607155	None	None	0.45229
SPATA21	-0.600165	0.140725	0.363639	None	None	0.851629
NECAP2	-0.347274	0.122826	0.336037	None	None	0.91071
LINC01772	-0.60081	0.279824	0.533091	None	None	0.553115
AL137802.2	-6.11213	0.0343933	0.155145	None	None	1.46353
NBPF1	-0.176509	0.576333	0.781646	None	None	0.239327
AL137798.2	NA	NA	NA	None	None	NA
AL021920.3	NA	NA	NA	None	None	NA
CROCC	0.471412	0.14331	0.367679	None	None	0.843723
BX284668.2	NA	NA	NA	None	None	NA
BX284668.5	-0.514127	0.803886	0.912464	None	None	0.0948057
BX284668.6	-1.00124	0.626522	0.814856	None	None	0.203064
MFAP2	2.05094	0.109839	0.314437	None	None	0.959244
AL049569.1	0.399987	0.226075	0.471356	None	None	0.645747
ATP13A2	0.792475	1.55801e-05	0.000569492	None	None	4.80743
SDHB	0.496329	0.00966979	0.0681807	None	None	2.01458
PADI2	-1.40834	0.121827	0.334486	None	None	0.914258
PADI1	-3.81903	2.35538e-10	7.25458e-08	None	None	9.62794
PADI3	-5.71058	0.00285163	0.0299284	None	None	2.54491
PADI4	NA	NA	NA	None	None	NA
PADI6	NA	NA	NA	None	None	NA
RCC2	0.877961	7.52373e-05	0.00197424	None	None	4.12357
ARHGEF10L	1.28327	8.9503e-07	6.11485e-05	None	None	6.04816
LINC02810	NA	NA	NA	None	None	NA
LINC01654	NA	NA	NA	None	None	NA
IGSF21	NA	NA	NA	None	None	NA
PAX7	NA	NA	NA	None	None	NA
ALDH4A1	-0.160917	0.715037	0.867109	None	None	0.145672
IFFO2	-0.292989	0.462474	0.70299	None	None	0.334913
AL137127.1	NA	NA	NA	None	None	NA
UBR4	0.22338	0.190659	0.428024	None	None	0.719743
EMC1-AS1	-0.221976	0.307085	0.560582	None	None	0.512741
EMC1	0.378505	0.0478714	0.190593	None	None	1.31992
MRTO4	0.38301	0.0769348	0.252701	None	None	1.11388
AKR7A3	-4.99589	0.15336	0.380422	None	None	0.814289
AKR7A2	-0.369607	0.125611	0.340245	None	None	0.900973
SLC66A1	0.0689345	0.839417	0.93044	None	None	0.0760223
CAPZB	0.352712	0.0292772	0.140072	None	None	1.53347
MICOS10	-0.0962698	0.749279	0.885263	None	None	0.125357
AL031727.2	NA	NA	NA	None	None	NA
NBL1	-2.51276	0.127227	0.342767	None	None	0.89542
HTR6	NA	NA	NA	None	None	NA
TMCO4	0.648454	0.227415	0.472798	None	None	0.64318
OTUD3	0.74569	0.0215014	0.114862	None	None	1.66753
PLA2G2D	NA	NA	NA	None	None	NA
PLA2G2F	-0.535866	0.613525	0.806415	None	None	0.212168
Z98257.1	-0.45905	0.710719	0.864887	None	None	0.148302
PLA2G2C	NA	NA	NA	None	None	NA
UBXN10	NA	NA	NA	None	None	NA
CAMK2N1	-1.24679	0.183995	0.420671	None	None	0.735195
MUL1	0.194433	0.592641	0.792484	None	None	0.227208
CDA	-0.257829	0.663811	0.838715	None	None	0.177955
PINK1	-0.0227592	0.942192	0.97577	None	None	0.0258607
PINK1-AS	-0.470032	0.348186	0.602826	None	None	0.458189
DDOST	0.265322	0.204682	0.44632	None	None	0.688921
KIF17	-0.12437	0.727793	0.873723	None	None	0.137992
SH2D5	-0.248126	0.580879	0.784481	None	None	0.235914
AL663074.1	NA	NA	NA	None	None	NA
HP1BP3	-0.345916	0.0144303	0.0886001	None	None	1.84073
EIF4G3	0.59196	0.00116871	0.0154631	None	None	2.93229
AL031005.2	NA	NA	NA	None	None	NA
ECE1	-0.990541	0.00243329	0.0265795	None	None	2.61381
AL031005.1	NA	NA	NA	None	None	NA
AL031728.1	-4.9919	0.151125	0.377218	None	None	0.820665
NBPF3	0.121762	0.575786	0.781341	None	None	0.239739
ALPL	1.12546	0.225981	0.471276	None	None	0.645928
LINC02596	-4.67928	0.0164879	0.0964669	None	None	1.78283
RAP1GAP	-0.390127	0.0839049	0.265279	None	None	1.07621
USP48	0.45822	0.00223399	0.025103	None	None	2.65092
LDLRAD2	NA	NA	NA	None	None	NA
HSPG2	0.5031	0.179744	0.414563	None	None	0.745346
CELA3B	NA	NA	NA	None	None	NA
CELA3A	NA	NA	NA	None	None	NA
LINC01635	NA	NA	NA	None	None	NA
LINC00339	-0.905409	0.0819298	0.261563	None	None	1.08656
CDC42	0.112255	0.463612	0.703981	None	None	0.333845
CDC42-AS1	-0.90993	0.0534004	0.202541	None	None	1.27246
CDC42-IT1	0.963006	0.032097	0.148642	None	None	1.49354
WNT4	-0.514451	0.423656	0.671093	None	None	0.372987
AL445253.1	-5.11853	0.0349331	0.156566	None	None	1.45676
ZBTB40	0.306674	0.296809	0.550693	None	None	0.527523
TEX46	NA	NA	NA	None	None	NA
KDM1A	0.103898	0.705632	0.86199	None	None	0.151422
AL031428.1	-0.276794	0.279164	0.53243	None	None	0.55414
LUZP1	0.554358	0.00946849	0.0671924	None	None	2.02372
HTR1D	NA	NA	NA	None	None	NA
LINC01355	0.537026	0.0102443	0.0707871	None	None	1.98952
AL109936.6	-0.0463051	0.914051	0.963925	None	None	0.0390294
HNRNPR	0.443448	0.000611834	0.00963549	None	None	3.21337
ZNF436	0.206565	0.546793	0.763973	None	None	0.262177
ZNF436-AS1	0.129665	0.735391	0.878538	None	None	0.133482
TCEA3	0.0667695	0.918591	0.965791	None	None	0.0368779
ASAP3	0.363795	0.471953	0.709762	None	None	0.326101
E2F2	-0.741003	0.249225	0.499198	None	None	0.603408
AL021154.1	-2.39396	0.557413	NA	None	None	0.253823
ID3	0.431839	0.253794	0.504207	None	None	0.595518
AL450043.1	-0.828164	0.148371	0.373631	None	None	0.82865
MDS2	-0.334775	0.540094	0.760097	None	None	0.26753
RPL11	0.120165	0.558231	0.770727	None	None	0.253186
ELOA-AS1	0.307267	0.229412	0.475318	None	None	0.639385
ELOA	0.419593	0.0444936	0.182044	None	None	1.3517
PITHD1	-0.30211	0.223096	0.46838	None	None	0.651508
LYPLA2	-0.0957222	0.691131	0.852816	None	None	0.160439
GALE	-0.988059	0.000277801	0.00533674	None	None	3.55627
HMGCL	-0.570083	0.0285178	0.137878	None	None	1.54488
FUCA1	-0.144044	0.562551	0.773407	None	None	0.249838
PNRC2	-0.0415359	0.836125	0.928858	None	None	0.077729
SRSF10	-0.0431341	0.765813	0.89297	None	None	0.115877
AL591178.1	-0.434706	0.915059	NA	None	None	0.0385511
MYOM3	-2.39396	0.557413	NA	None	None	0.253823
IL22RA1	-2.39396	0.557413	NA	None	None	0.253823
IFNLR1	0.374154	0.215881	0.459443	None	None	0.665787
AL138902.1	-1.52235	0.227686	0.473205	None	None	0.642663
GRHL3	0.18877	0.766471	0.893162	None	None	0.115504
STPG1	0.164334	0.578479	0.783062	None	None	0.237712
NIPAL3	0.794171	0.0196291	0.108208	None	None	1.7071
RCAN3AS	-0.258614	0.447955	0.691665	None	None	0.348765
RCAN3	0.50771	0.0126025	0.0814502	None	None	1.89954
NCMAP-DT	-4.62711	0.0694704	0.2377	None	None	1.1582
NCMAP	-0.0961357	0.848346	0.93413	None	None	0.0714268
SRRM1	-0.0982975	0.595621	0.794798	None	None	0.22503
AL445648.1	-1.11371	0.355822	0.610074	None	None	0.448767
CLIC4	0.571574	0.000963305	0.0135158	None	None	3.01624
RUNX3	4.03733	0.0820357	0.261768	None	None	1.086
AL050344.1	NA	NA	NA	None	None	NA
AL031432.1	NA	NA	NA	None	None	NA
SYF2	-0.131318	0.403627	0.654074	None	None	0.39402
AL031432.4	-0.384899	0.522144	0.74783	None	None	0.28221
AL031432.5	NA	NA	NA	None	None	NA
RSRP1	-0.706354	0.000283562	0.00541418	None	None	3.54735
AL031432.3	NA	NA	NA	None	None	NA
RHD	-1.16189	0.0599312	0.217959	None	None	1.22235
TMEM50A	0.171443	0.353647	0.607675	None	None	0.45143
RHCE	-0.645895	0.171279	0.402124	None	None	0.766296
MACO1	-0.150067	0.457657	0.699182	None	None	0.33946
LDLRAP1	-0.177031	0.390571	0.643389	None	None	0.4083
AL606491.1	-3.0025	0.450936	NA	None	None	0.345885
MAN1C1	-0.908365	0.000479916	0.00798642	None	None	3.31883
AL031280.1	-1.63291	4.07098e-08	4.99906e-06	None	None	7.3903
SELENON	-0.122824	0.642122	0.825241	None	None	0.192382
AL020996.1	-0.925966	0.392874	0.645281	None	None	0.405747
MTFR1L	-0.147625	0.537619	0.758472	None	None	0.269526
AUNIP	0.421404	0.1732	0.404582	None	None	0.761452
AL033528.2	-0.382385	0.47425	0.711362	None	None	0.323993
PAQR7	0.208678	0.463688	0.703981	None	None	0.333774
STMN1	-0.203359	0.7229	0.870854	None	None	0.140922
PAFAH2	-0.59708	0.00316365	0.0321464	None	None	2.49981
EXTL1	-1.1076	0.082837	0.262985	None	None	1.08178
SLC30A2	0.121688	0.600605	0.797996	None	None	0.221411
AL391650.2	-1.56617	0.000236407	0.00475038	None	None	3.62634
TRIM63	-5.56391	0.00139707	0.0175926	None	None	2.85478
PDIK1L	-0.239654	0.619432	0.810834	None	None	0.208006
FAM110D	NA	NA	NA	None	None	NA
C1orf232	NA	NA	NA	None	None	NA
AL391650.1	NA	NA	NA	None	None	NA
ZNF593	0.36738	0.200425	0.440452	None	None	0.698049
CNKSR1	0.0291367	0.93525	0.972817	None	None	0.0290725
CEP85	-0.23124	0.358933	0.613559	None	None	0.444987
SH3BGRL3	-0.65035	0.00121769	0.0159428	None	None	2.91446
UBXN11	0.609726	0.122403	0.335292	None	None	0.912208
CD52	-0.143202	0.686144	0.850652	None	None	0.163585
CRYBG2	0.405562	0.140249	0.36295	None	None	0.853099
ZNF683	NA	NA	NA	None	None	NA
LIN28A	NA	NA	NA	None	None	NA
DHDDS	0.370179	0.0576298	0.212721	None	None	1.23935
AL513365.2	-0.325637	0.357339	0.611613	None	None	0.44692
HMGN2	0.0280401	0.910063	0.962275	None	None	0.0409287
RPS6KA1	0.113513	0.820848	0.922127	None	None	0.0857374
AL512408.1	NA	NA	NA	None	None	NA
ARID1A	0.519774	5.2617e-05	0.00150467	None	None	4.27887
PIGV	-0.361769	0.338213	0.593139	None	None	0.47081
ZDHHC18	-0.355648	0.106958	0.308974	None	None	0.970785
SFN	-1.09764	0.000189669	0.00405867	None	None	3.722
GPN2	0.305626	0.217937	0.462041	None	None	0.661668
GPATCH3	-0.224253	0.435251	0.681061	None	None	0.36126
NUDC	0.350989	0.0499761	0.194763	None	None	1.30124
KDF1	-0.10166	0.778667	0.898679	None	None	0.108648
TRNP1	-2.8677	0.0837833	0.265048	None	None	1.07684
TENT5B	0.0875424	0.85275	0.936271	None	None	0.0691781
SLC9A1	0.558215	0.0089788	0.064708	None	None	2.04678
WDTC1	0.159604	0.569211	0.776558	None	None	0.244727
TMEM222	0.179484	0.35124	0.606034	None	None	0.454396
SYTL1	-1.01813	0.0526193	0.200611	None	None	1.27885
MAP3K6	-4.5786	1.89024e-05	0.000656448	None	None	4.72348
FCN3	NA	NA	NA	None	None	NA
CD164L2	NA	NA	NA	None	None	NA
GPR3	NA	NA	NA	None	None	NA
WASF2	-0.626687	0.000309601	0.00575337	None	None	3.5092
FO393419.2	-1.3621	0.00646631	0.0524823	None	None	2.18934
BX293535.1	-4.98457	0.166247	0.395552	None	None	0.779245
AHDC1	-1.00425	0.00134803	0.0171789	None	None	2.8703
FGR	NA	NA	NA	None	None	NA
LINC02574	NA	NA	NA	None	None	NA
IFI6	0.342674	0.029395	0.140207	None	None	1.53173
AL445490.1	-0.730828	0.346382	0.601018	None	None	0.460445
AL020997.5	-4.41189	0.265776	NA	None	None	0.575484
FAM76A	-0.429428	0.128796	0.34517	None	None	0.890098
STX12	0.147864	0.421799	0.669773	None	None	0.374895
AL020997.2	-1.44673	0.483754	0.719403	None	None	0.315375
AL020997.3	NA	NA	NA	None	None	NA
AL020997.4	-6.12046	0.00116694	0.0154507	None	None	2.93295
PPP1R8	0.107159	0.620361	0.811145	None	None	0.207356
THEMIS2	-3.26424	0.0764164	0.252233	None	None	1.11681
RPA2	0.412579	0.130191	0.346807	None	None	0.885419
SMPDL3B	1.46994	0.165709	0.395246	None	None	0.780655
AL512288.1	0.926399	0.533653	0.755763	None	None	0.272741
XKR8	0.790676	0.0699828	0.238887	None	None	1.15501
EYA3	0.503711	0.000996269	0.0138328	None	None	3.00162
PTAFR	0.223229	0.731402	0.876088	None	None	0.135844
DNAJC8	0.092699	0.544798	0.762615	None	None	0.263765
ATP5IF1	-0.198245	0.361591	0.616477	None	None	0.441782
AL353622.1	-0.740576	0.142129	0.365997	None	None	0.847318
AL353622.2	NA	NA	NA	None	None	NA
SESN2	0.0938648	0.66806	0.840803	None	None	0.175185
MED18	0.140153	0.716147	0.867503	None	None	0.144998
PHACTR4	0.0720969	0.712063	0.865793	None	None	0.147482
RCC1	1.01128	0.000998239	0.0138413	None	None	3.00077
SNHG3	0.466374	0.0530891	0.201732	None	None	1.27499
TRNAU1AP	-0.138201	0.420532	0.668496	None	None	0.376201
SNHG12	0.140001	0.644681	0.826949	None	None	0.190655
TAF12	0.124107	0.458828	0.69994	None	None	0.33835
RAB42	-2.39396	0.557413	NA	None	None	0.253823
LINC01715	0.903486	0.322979	0.577641	None	None	0.490826
AL360012.1	-6.44894	1.63646e-05	0.000585633	None	None	4.7861
GMEB1	0.448885	0.00941499	0.066978	None	None	2.02618
YTHDF2	0.367862	0.024772	0.125314	None	None	1.60604
EPB41	0.435028	0.0341973	0.154717	None	None	1.46601
TMEM200B	NA	NA	NA	None	None	NA
AL357500.1	-5.73019	0.0605543	0.218819	None	None	1.21785
SRSF4	0.00244761	0.983079	0.993015	None	None	0.00741175
MECR	0.423821	0.0343253	0.155089	None	None	1.46439
PTPRU	-0.455006	0.277203	0.530556	None	None	0.557201
LINC01756	-4.20797	0.248315	0.498577	None	None	0.604997
MATN1-AS1	-3.50604	0.00506872	0.0443141	None	None	2.2951
SDC3	2.16687	0.000662534	0.0102873	None	None	3.17879
PUM1	0.548228	0.000349224	0.00629676	None	None	3.4569
SNRNP40	0.0613938	0.752183	0.886047	None	None	0.123677
ZCCHC17	0.317519	0.211439	0.454417	None	None	0.674816
AL451070.1	-0.282472	0.335339	0.590031	None	None	0.474516
FABP3	-1.35139	0.235484	0.482998	None	None	0.628039
SERINC2	0.330638	0.460458	0.701257	None	None	0.33681
LINC01226	1.00475	0.0504077	0.19565	None	None	1.2975
AC114488.1	-0.566523	0.790657	0.905604	None	None	0.102012
TINAGL1	0.503752	0.303924	0.557739	None	None	0.517235
HCRTR1	-2.31285	0.192431	0.429994	None	None	0.715726
PEF1	0.180299	0.620571	0.811251	None	None	0.207208
AC114488.2	NA	NA	NA	None	None	NA
AC114488.3	NA	NA	NA	None	None	NA
ADGRB2	-0.522745	0.824642	0.923984	None	None	0.0837346
SPOCD1	-4.60477	0.00546916	0.046813	None	None	2.26208
AL354919.1	NA	NA	NA	None	None	NA
AL136115.2	0.451917	0.274227	0.527456	None	None	0.56189
PTP4A2	0.550768	0.011501	0.0768695	None	None	1.93927
AL136115.1	-6.10665	0.0346216	0.155876	None	None	1.46065
AL136115.3	NA	NA	NA	None	None	NA
KHDRBS1	0.0641272	0.682529	0.848723	None	None	0.165879
AL445248.1	-0.792816	0.0243325	0.124199	None	None	1.61381
TMEM39B	0.26397	0.202114	0.442629	None	None	0.694404
KPNA6	0.493469	0.00141331	0.0177377	None	None	2.84976
AL049795.2	NA	NA	NA	None	None	NA
TXLNA	-0.0998674	0.529029	0.752865	None	None	0.276521
CCDC28B	-0.208046	0.765642	0.89297	None	None	0.115974
AL049795.1	NA	NA	NA	None	None	NA
IQCC	-4.61362	0.0020277	0.0233434	None	None	2.693
DCDC2B	-1.24446	0.0528342	0.201088	None	None	1.27708
TMEM234	-0.389871	0.31037	0.564441	None	None	0.50812
EIF3I	0.301745	0.181741	0.417836	None	None	0.740546
FAM167B	NA	NA	NA	None	None	NA
LCK	NA	NA	NA	None	None	NA
HDAC1	0.119194	0.552883	0.768823	None	None	0.257367
MARCKSL1	-2.7861	0.00717869	0.0560337	None	None	2.14395
TSSK3	-2.2456	0.191109	0.428728	None	None	0.71872
FAM229A	-0.179343	0.714737	0.867109	None	None	0.145854
BSDC1	0.171809	0.29753	0.551196	None	None	0.526469
ZBTB8B	0.842034	0.452822	0.695444	None	None	0.344073
ZBTB8A	-0.380112	0.286629	0.539761	None	None	0.542679
ZBTB8OS	0.279181	0.0842096	0.265503	None	None	1.07464
RBBP4	0.0164504	0.932313	0.971939	None	None	0.0304384
SYNC	-0.678193	0.00610669	0.0506197	None	None	2.21419
AC114489.1	NA	NA	NA	None	None	NA
KIAA1522	-1.4121	0.0108319	0.0735489	None	None	1.9653
YARS	0.601678	1.64686e-05	0.000588235	None	None	4.78334
S100PBP	-0.374569	0.244715	0.494477	None	None	0.611339
FNDC5	-4.29916	0.017364	0.10002	None	None	1.76035
HPCA	NA	NA	NA	None	None	NA
TMEM54	0.025993	0.959014	0.983564	None	None	0.0181751
AL031602.2	-0.757248	0.0770555	0.252877	None	None	1.1132
RNF19B	0.129753	0.627493	0.815533	None	None	0.202391
AL020995.1	0.554567	0.0753361	0.25025	None	None	1.123
AK2	0.895082	3.4656e-06	0.00018137	None	None	5.46022
AZIN2	-0.78301	0.162619	0.391711	None	None	0.788829
TRIM62	0.217421	0.428409	0.675474	None	None	0.368141
AL662907.3	-2.39396	0.557413	NA	None	None	0.253823
ZNF362	0.819742	0.0483178	0.191841	None	None	1.31589
AL513327.3	NA	NA	NA	None	None	NA
A3GALT2	-2.39396	0.557413	NA	None	None	0.253823
AL513327.1	-0.527457	0.10567	0.306472	None	None	0.976049
PHC2	0.277031	0.140251	0.36295	None	None	0.853093
AL513327.2	-0.0224161	0.949328	0.97903	None	None	0.0225839
ZSCAN20	0.161009	0.673962	0.844216	None	None	0.171364
CSMD2	NA	NA	NA	None	None	NA
C1orf94	NA	NA	NA	None	None	NA
SMIM12	-0.0724666	0.739185	0.88055	None	None	0.131247
GJB4	-3.23894	0.423071	NA	None	None	0.373586
GJB3	-3.93659	0.171263	0.402124	None	None	0.766336
DLGAP3	NA	NA	NA	None	None	NA
TMEM35B	-1.27539	0.153659	0.380614	None	None	0.813441
ZMYM6	-0.188876	0.524694	0.750054	None	None	0.280094
ZMYM1	-0.234783	0.249197	0.499198	None	None	0.603457
AL590434.1	0.903675	0.821448	NA	None	None	0.08542
SFPQ	0.0877506	0.513088	0.741417	None	None	0.289808
ZMYM4	0.245924	0.308166	0.561737	None	None	0.511215
ZMYM4-AS1	-0.451267	0.124029	0.337426	None	None	0.906475
KIAA0319L	0.11333	0.642515	0.82552	None	None	0.192117
NCDN	0.234428	0.641627	0.825112	None	None	0.192718
AC004865.2	-5.27075	0.0276687	0.135093	None	None	1.55801
TFAP2E	-0.668846	0.061695	0.220744	None	None	1.20975
PSMB2	-0.133616	0.546616	0.763851	None	None	0.262318
C1orf216	0.273766	0.904072	0.958678	None	None	0.0437968
CLSPN	0.421371	0.168834	0.399151	None	None	0.77254
AL354864.1	NA	NA	NA	None	None	NA
AGO4	0.465106	0.111222	0.316713	None	None	0.953811
AGO1	0.982566	0.413542	0.662541	None	None	0.383481
AL139286.3	-0.103501	0.935161	0.972817	None	None	0.0291138
AL139286.2	NA	NA	NA	None	None	NA
AGO3	0.836882	0.000356237	0.00638034	None	None	3.44826
AL138787.2	0.129901	0.725106	0.87189	None	None	0.139599
ADPRHL2	0.186224	0.453562	0.695993	None	None	0.343364
TRAPPC3	0.273153	0.146308	0.370514	None	None	0.834731
MAP7D1	0.283728	0.253853	0.504217	None	None	0.595418
THRAP3	0.437941	0.003897	0.0369036	None	None	2.40927
SH3D21	-0.456319	0.012984	0.0829195	None	None	1.88659
EVA1B	1.45666	5.86596e-05	0.00162197	None	None	4.23166
AL591845.1	-0.561411	0.129816	0.346152	None	None	0.886671
STK40	0.315052	0.120357	0.3321	None	None	0.919528
LSM10	0.509237	0.12283	0.336037	None	None	0.910697
OSCP1	-0.263206	0.384452	0.637575	None	None	0.415157
MRPS15	0.314102	0.342751	0.597578	None	None	0.465022
CSF3R	-0.00058603	0.998827	0.999199	None	None	0.000509927
AL353604.1	NA	NA	NA	None	None	NA
LINC01137	-0.000150471	0.999629	0.99977	None	None	0.00016118
ZC3H12A	0.010215	0.978325	0.99089	None	None	0.00951702
MEAF6	0.246062	0.243992	0.49366	None	None	0.612624
SNIP1	-0.231193	0.394506	0.646375	None	None	0.403946
DNALI1	-1.27183	0.450687	0.69416	None	None	0.346125
GNL2	0.624417	0.00963017	0.0680398	None	None	2.01637
RSPO1	-0.434706	0.915059	NA	None	None	0.0385511
C1orf109	0.517857	0.0720852	0.244024	None	None	1.14215
CDCA8	-0.43937	0.342794	0.597578	None	None	0.464967
MANEAL	-3.19513	0.0391564	0.168693	None	None	1.4072
YRDC	0.667979	0.00825774	0.0612743	None	None	2.08314
C1orf122	0.186604	0.432626	0.67878	None	None	0.363887
MTF1	0.299472	0.112261	0.318748	None	None	0.949772
AL929472.2	NA	NA	NA	None	None	NA
INPP5B	0.495019	0.00362685	0.0352473	None	None	2.44047
SF3A3	0.371988	0.0881979	0.27394	None	None	1.05454
FHL3	1.00078	0.149439	0.375047	None	None	0.825535
UTP11	0.27072	0.264088	0.516662	None	None	0.578251
POU3F1	-2.4125	0.54874	NA	None	None	0.260633
MIR3659HG	-2.39953	0.491962	NA	None	None	0.308068
LINC01685	NA	NA	NA	None	None	NA
AL354702.2	NA	NA	NA	None	None	NA
RRAGC	0.199233	0.372899	0.627106	None	None	0.428408
AL139260.1	-0.593289	0.0014198	0.0178072	None	None	2.84777
MYCBP	-0.491619	0.0177524	0.101408	None	None	1.75074
GJA9	-1.25761	0.000894573	0.0128923	None	None	3.04838
RHBDL2	-1.12023	0.00114533	0.0153323	None	None	2.94107
AKIRIN1	0.152253	0.479212	0.715539	None	None	0.319472
NDUFS5	-0.00246447	0.994814	0.997315	None	None	0.00225823
MACF1	0.131697	0.571548	0.778077	None	None	0.242947
AL356055.1	NA	NA	NA	None	None	NA
AL442071.2	-0.639433	0.113184	0.320498	None	None	0.946214
AL442071.1	-0.345971	0.453033	0.695561	None	None	0.34387
BMP8A	-0.533931	0.244554	0.494328	None	None	0.611625
PABPC4	0.773036	0.001627	0.0197595	None	None	2.78861
PABPC4-AS1	0.219894	0.629605	0.816449	None	None	0.200932
HEYL	0.254679	0.949048	NA	None	None	0.0227116
NT5C1A	NA	NA	NA	None	None	NA
HPCAL4	NA	NA	NA	None	None	NA
PPIE	-0.263249	0.452846	0.695444	None	None	0.34405
BMP8B	-3.78594	0.198058	NA	None	None	0.703207
OXCT2	NA	NA	NA	None	None	NA
AL033527.4	NA	NA	NA	None	None	NA
LINC02811	NA	NA	NA	None	None	NA
TRIT1	0.667146	0.0110587	0.0746665	None	None	1.9563
MYCL	0.662673	0.565209	0.77484	None	None	0.247791
MFSD2A	0.1905	0.586691	0.788579	None	None	0.23159
CAP1	0.450534	0.00582955	0.0490487	None	None	2.23436
PPT1	-0.171985	0.394775	0.646375	None	None	0.403651
RLF	0.0324861	0.803461	0.912276	None	None	0.0950352
TMCO2	-4.41767	0.265523	NA	None	None	0.575898
AL050341.2	0.0374734	0.950187	0.979539	None	None	0.0221911
ZMPSTE24	0.761149	1.35207e-05	0.00050907	None	None	4.869
SMAP2	0.372137	0.331099	0.58636	None	None	0.480042
AL031985.4	-2.88728	0.177328	0.411109	None	None	0.751224
ZFP69B	0.320942	0.936825	NA	None	None	0.0283415
AL031985.3	NA	NA	NA	None	None	NA
ZFP69	-1.09724	0.511236	0.740015	None	None	0.291379
AL603839.3	-0.790304	0.12805	0.343638	None	None	0.892619
EXO5	-1.58851	0.305102	0.558755	None	None	0.515554
ZNF684	-1.38387	0.0193699	0.107311	None	None	1.71287
AL356379.2	NA	NA	NA	None	None	NA
AL031289.1	-4.46858	0.105155	0.305704	None	None	0.978171
NFYC-AS1	-0.417702	0.305366	0.558865	None	None	0.51518
NFYC	0.624363	0.0124436	0.0809963	None	None	1.90505
KCNQ4	2.95301	0.310561	NA	None	None	0.507853
CITED4	-1.02545	0.0400389	0.171172	None	None	1.39752
AC119677.1	-3.99245	0.3168	NA	None	None	0.499215
CTPS1	0.977872	0.00284445	0.0299132	None	None	2.546
SLFNL1-AS1	0.460878	0.353314	0.607435	None	None	0.45184
SLFNL1	0.240124	0.699421	0.857818	None	None	0.155261
SCMH1	-0.32403	0.404469	0.654818	None	None	0.393115
AC093151.8	1.16629	0.769954	NA	None	None	0.113535
FOXO6	0.0104121	0.983352	0.993131	None	None	0.00729095
AC093151.2	-4.18284	0.0937609	0.284585	None	None	1.02798
HIVEP3	0.331154	0.384169	0.63733	None	None	0.415478
AL158216.1	NA	NA	NA	None	None	NA
GUCA2A	NA	NA	NA	None	None	NA
FOXJ3	-0.287512	0.231201	0.477762	None	None	0.636009
AC096540.1	NA	NA	NA	None	None	NA
RIMKLA	-2.79727	0.00282312	0.0297314	None	None	2.54927
ZMYND12	-4.98167	0.207017	NA	None	None	0.683993
PPCS	-0.139465	0.554233	0.769294	None	None	0.256308
CCDC30	0.416363	0.110356	0.315389	None	None	0.957205
PPIH	0.337599	0.228665	0.474558	None	None	0.6408
AC098484.4	-0.340258	0.305371	0.558865	None	None	0.515172
AC098484.2	NA	NA	NA	None	None	NA
YBX1	-0.0451699	0.871994	0.944375	None	None	0.0594866
P3H1	-0.685626	0.0469981	0.188313	None	None	1.32792
C1orf50	-0.217805	0.352945	0.607155	None	None	0.452293
AC098484.1	NA	NA	NA	None	None	NA
TMEM269	-0.549111	0.158623	0.386488	None	None	0.799634
SVBP	0.363264	0.252172	0.502176	None	None	0.598302
ERMAP	-0.194128	0.432402	0.678524	None	None	0.364113
AL512353.1	-0.734953	0.280263	0.533601	None	None	0.552435
ZNF691	0.317163	0.477604	0.714396	None	None	0.320932
SLC2A1	-0.14815	0.613893	0.80656	None	None	0.211908
SLC2A1-AS1	-1.22787	0.0016708	0.0201742	None	None	2.77708
AC099795.1	-2.13351	0.0166489	0.097121	None	None	1.77861
FAM183A	-0.309126	0.486956	0.722378	None	None	0.312511
EBNA1BP2	0.41042	0.0546062	0.205674	None	None	1.26276
CFAP57	0.374103	0.549491	0.766034	None	None	0.26004
TMEM125	0.126285	0.840262	0.930721	None	None	0.0755854
C1orf210	0.612921	0.562264	0.77317	None	None	0.25006
MPL	NA	NA	NA	None	None	NA
AL139289.3	NA	NA	NA	None	None	NA
AL139289.2	0.109866	0.827624	0.925387	None	None	0.0821667
CDC20	-0.32459	0.461008	0.701842	None	None	0.336291
ELOVL1	0.102786	0.683874	0.849431	None	None	0.165024
MED8	-0.264246	0.195065	0.433551	None	None	0.709821
AL139289.1	-4.98457	0.166247	0.395552	None	None	0.779245
SZT2	0.222148	0.182848	0.419099	None	None	0.737909
HYI	-0.635087	0.458454	0.699483	None	None	0.338704
HYI-AS1	NA	NA	NA	None	None	NA
PTPRF	0.297456	0.0931909	0.284002	None	None	1.03063
KDM4A	0.344551	0.125627	0.340245	None	None	0.900917
KDM4A-AS1	-0.0598452	0.819534	0.921558	None	None	0.0864332
ST3GAL3	0.499615	0.158945	0.386855	None	None	0.798753
AL451062.1	-1.0189	0.0615628	0.220523	None	None	1.21068
AL357079.1	-2.92184	0.0922209	0.282098	None	None	1.03517
IPO13	0.763927	0.304649	0.558469	None	None	0.5162
DPH2	1.42295	0.184453	0.420671	None	None	0.734114
ATP6V0B	0.682228	0.00678379	0.0542819	None	None	2.16853
B4GALT2	-0.16372	0.796964	0.908651	None	None	0.0985614
CCDC24	-0.876302	0.0745572	0.249072	None	None	1.12751
AL139220.2	-1.75328	0.29467	0.548632	None	None	0.530664
DMAP1	0.0982569	0.831878	0.926896	None	None	0.0799402
ERI3	0.312794	0.145899	0.370192	None	None	0.835948
RNF220	-0.651251	0.150911	0.377218	None	None	0.821279
TMEM53	-0.496793	0.184716	0.420671	None	None	0.733496
ARMH1	-0.428104	0.279673	0.533018	None	None	0.55335
KIF2C	-0.444056	0.41587	0.664438	None	None	0.381043
AL592166.1	-0.268709	0.566635	0.775586	None	None	0.246697
RPS8	-0.0502763	0.788084	0.904271	None	None	0.103427
BEST4	NA	NA	NA	None	None	NA
PLK3	0.280184	0.233204	0.480211	None	None	0.632264
TCTEX1D4	-7.55171	6.5818e-07	4.77448e-05	None	None	6.18166
BTBD19	0.113602	0.595474	0.794698	None	None	0.225137
PTCH2	-1.76672	0.00335982	0.0335411	None	None	2.47368
EIF2B3	-0.478013	0.313121	0.567403	None	None	0.504287
HECTD3	-0.0720171	0.828305	0.925452	None	None	0.0818099
UROD	-0.485989	0.27436	0.527513	None	None	0.56168
ZSWIM5	0.649983	0.00087347	0.0126724	None	None	3.05875
LINC01144	NA	NA	NA	None	None	NA
HPDL	3.16604	0.000889391	0.0128537	None	None	3.05091
MUTYH	0.0927513	0.714166	0.866948	None	None	0.146201
TOE1	0.329239	0.32065	0.575558	None	None	0.493969
TESK2	-0.0398243	0.897083	0.955194	None	None	0.0471672
CCDC163	-4.955	0.00772643	0.0586522	None	None	2.11202
MMACHC	0.0868864	0.885492	0.950555	None	None	0.0528155
PRDX1	0.17934	0.298511	0.551738	None	None	0.52504
AKR1A1	0.0512063	0.882403	0.949217	None	None	0.0543331
NASP	0.147841	0.331846	0.587031	None	None	0.479063
CCDC17	0.502979	0.708802	0.863337	None	None	0.149475
GPBP1L1	0.33823	0.0464973	0.18698	None	None	1.33257
TMEM69	0.308252	0.184127	0.420671	None	None	0.734882
IPP	0.0706423	0.796692	0.908651	None	None	0.0987097
AL604028.1	NA	NA	NA	None	None	NA
MAST2	0.566235	0.00152982	0.0188227	None	None	2.81536
PIK3R3	-0.62786	0.0211793	0.113691	None	None	1.67409
AL358075.1	NA	NA	NA	None	None	NA
AL358075.2	NA	NA	NA	None	None	NA
TSPAN1	-5.83697	0.0107126	0.0730819	None	None	1.97011
P3R3URF	NA	NA	NA	None	None	NA
POMGNT1	-0.280096	0.333009	0.588182	None	None	0.477544
LURAP1	0.0205442	0.96797	0.98688	None	None	0.014138
RAD54L	0.239577	0.693768	0.854442	None	None	0.158786
LRRC41	-0.112196	0.646817	0.827803	None	None	0.189218
UQCRH	0.316441	0.085415	0.267775	None	None	1.06847
NSUN4	0.270679	0.120198	0.331857	None	None	0.920101
FAAH	0.0460546	0.888607	0.95129	None	None	0.0512904
DMBX1	NA	NA	NA	None	None	NA
MKNK1-AS1	0.000363062	0.99955	0.999762	None	None	0.000195675
MKNK1	0.46288	0.0491431	0.193645	None	None	1.30854
MOB3C	2.03879	0.605893	NA	None	None	0.217604
ATPAF1	0.211355	0.429543	0.676427	None	None	0.366994
TEX38	-2.80398	0.0910523	0.280107	None	None	1.04071
EFCAB14-AS1	-0.124232	0.706352	0.862242	None	None	0.150979
EFCAB14	0.394483	0.0264839	0.131218	None	None	1.57702
CYP4B1	-2.39396	0.557413	NA	None	None	0.253823
CYP4Z1	NA	NA	NA	None	None	NA
CYP4A22-AS1	0.068168	0.986602	NA	None	None	0.0058578
STIL	0.411194	0.20044	0.440452	None	None	0.698016
CMPK1	0.122167	0.403776	0.654156	None	None	0.39386
LINC01389	-0.617148	0.28247	0.536119	None	None	0.549028
TRABD2B	NA	NA	NA	None	None	NA
LINC02794	NA	NA	NA	None	None	NA
AL109659.1	NA	NA	NA	None	None	NA
SLC5A9	NA	NA	NA	None	None	NA
SPATA6	-0.398111	0.830457	0.926412	None	None	0.0806826
AGBL4	0.310052	0.642383	0.825463	None	None	0.192206
AL645507.1	NA	NA	NA	None	None	NA
AC099788.1	-0.469136	0.811765	0.917201	None	None	0.0905696
AL590432.1	NA	NA	NA	None	None	NA
ELAVL4	NA	NA	NA	None	None	NA
DMRTA2	NA	NA	NA	None	None	NA
FAF1	-0.029267	0.884045	0.94998	None	None	0.0535255
AL049637.1	-1.23888	0.0275245	0.134529	None	None	1.56028
CDKN2C	-2.83606	0.242455	NA	None	None	0.615369
C1orf185	NA	NA	NA	None	None	NA
LINC01562	-0.54697	0.559356	0.771486	None	None	0.252311
RNF11	0.241309	0.174464	0.406427	None	None	0.758294
AL162430.2	-0.736433	0.0339937	0.154327	None	None	1.4686
TTC39A	0.368158	0.147253	0.37176	None	None	0.831935
TTC39A-AS1	0.241522	0.642954	0.825914	None	None	0.19182
EPS15	0.424971	0.0466114	0.18719	None	None	1.33151
AC104170.2	-3.69721	0.0644993	0.226233	None	None	1.19045
AC104170.1	-0.462846	0.51351	0.741649	None	None	0.289451
OSBPL9	-0.363901	0.0955913	0.287769	None	None	1.01958
NRDC	0.365048	0.0178695	0.101737	None	None	1.74789
AL050343.2	-5.00019	0.16406	0.393041	None	None	0.784997
AL050343.3	NA	NA	NA	None	None	NA
RAB3B	0.186096	0.404623	0.65501	None	None	0.39295
TXNDC12	0.262275	0.131152	0.348724	None	None	0.882225
KTI12	-0.103886	0.791467	0.906223	None	None	0.101567
AL445685.1	-0.708479	0.114988	0.32322	None	None	0.939346
TXNDC12-AS1	-5.00019	0.16406	0.393041	None	None	0.784997
BTF3L4	0.263893	0.0598689	0.217777	None	None	1.2228
ZFYVE9	-0.206273	0.429403	0.676427	None	None	0.367135
CC2D1B	-0.211586	0.387349	0.640726	None	None	0.411897
AL513218.1	NA	NA	NA	None	None	NA
AL513218.2	0.405384	0.590112	0.790632	None	None	0.229065
ORC1	0.125368	0.787493	0.903986	None	None	0.103753
PRPF38A	-0.37614	0.0802495	0.258482	None	None	1.09556
TUT4	-0.580703	0.0169494	0.0983158	None	None	1.77085
GPX7	-4.87096	0.0574849	0.212436	None	None	1.24045
SHISAL2A	-0.676833	0.801475	NA	None	None	0.09611
COA7	0.552429	0.0179439	0.101919	None	None	1.74608
ZYG11B	-0.0501335	0.873535	0.945118	None	None	0.0587198
ZYG11A	0.287954	0.289502	0.542506	None	None	0.538348
ECHDC2	-0.424351	0.203718	0.445467	None	None	0.690971
SCP2	0.0646753	0.859633	0.939584	None	None	0.0656872
PODN	NA	NA	NA	None	None	NA
CPT2	-0.481676	0.145952	0.370192	None	None	0.83579
AL606760.2	-1.03175	0.634133	0.819603	None	None	0.19782
CZIB	0.0962882	0.800796	0.911067	None	None	0.0964781
AL606760.3	-5.52006	0.00431864	0.0396185	None	None	2.36465
MAGOH	0.434905	0.0775781	0.253573	None	None	1.11026
AL606760.1	1.71746	0.000178795	0.00387899	None	None	3.74764
LRP8	1.88825	9.92512e-07	6.61252e-05	None	None	6.00326
AL355483.3	NA	NA	NA	None	None	NA
AL355483.1	NA	NA	NA	None	None	NA
AL355483.2	NA	NA	NA	None	None	NA
LINC01771	3.3338	0.0282614	0.137203	None	None	1.54881
AC119428.2	4.63977	0.121489	0.333982	None	None	0.915461
LINC02812	3.39069	0.357298	NA	None	None	0.446969
DMRTB1	NA	NA	NA	None	None	NA
GLIS1	1.43487	0.71809	NA	None	None	0.143821
NDC1	0.816608	0.0043576	0.0398785	None	None	2.36075
YIPF1	-0.0590046	0.840778	0.930906	None	None	0.0753186
DIO1	-0.853538	0.0647545	0.226852	None	None	1.18873
HSPB11	-0.493153	0.058608	0.214799	None	None	1.23204
LRRC42	-0.133212	0.569219	0.776558	None	None	0.24472
LDLRAD1	NA	NA	NA	None	None	NA
TMEM59	-0.0579261	0.680648	0.847731	None	None	0.167077
TCEANC2	0.00974511	0.974373	0.989114	None	None	0.011275
CYB5RL	1.01767	0.0384367	0.166701	None	None	1.41525
MRPL37	0.533178	0.0632088	0.223942	None	None	1.19922
SSBP3	-0.227854	0.344013	0.598788	None	None	0.463425
SSBP3-AS1	NA	NA	NA	None	None	NA
AL161644.1	NA	NA	NA	None	None	NA
AL035415.1	NA	NA	NA	None	None	NA
AC099796.2	-4.41603	0.00324779	0.0326832	None	None	2.48841
ACOT11	-1.52548	6.68671e-05	0.00181284	None	None	4.17479
FAM151A	-7.46974	0.000179005	0.00387907	None	None	3.74713
AL590093.1	NA	NA	NA	None	None	NA
MROH7	-1.61959	0.221375	0.466383	None	None	0.654871
TTC4	0.0150366	0.956107	0.982201	None	None	0.0194935
PARS2	-0.2674	0.664543	0.838967	None	None	0.177477
TTC22	NA	NA	NA	None	None	NA
LEXM	NA	NA	NA	None	None	NA
DHCR24	0.148733	0.705547	0.861942	None	None	0.151474
AC096536.3	-0.801727	0.0958402	0.288094	None	None	1.01845
DHCR24-DT	NA	NA	NA	None	None	NA
AL590440.2	NA	NA	NA	None	None	NA
PCSK9	NA	NA	NA	None	None	NA
USP24	0.457671	0.164648	0.393713	None	None	0.783444
MIR4422HG	-1.39648	0.731867	NA	None	None	0.135568
AL603840.1	-1.43653	0.274334	0.527513	None	None	0.56172
LINC01753	NA	NA	NA	None	None	NA
AL353681.1	-4.74124	0.230663	NA	None	None	0.637021
AC119674.1	0.998496	0.0565693	0.210294	None	None	1.24742
LINC01767	NA	NA	NA	None	None	NA
PLPP3	0.455048	0.127019	0.342484	None	None	0.896133
PRKAA2	-0.513502	0.30566	0.559097	None	None	0.514761
FYB2	-1.54286	0.47024	0.708551	None	None	0.327681
C8A	NA	NA	NA	None	None	NA
DAB1	0.819718	0.0999479	0.295953	None	None	1.00023
AL445193.2	NA	NA	NA	None	None	NA
OMA1	-0.0515834	0.911969	0.962787	None	None	0.0400201
AL035411.3	NA	NA	NA	None	None	NA
TACSTD2	-0.547594	0.0303307	0.142981	None	None	1.51812
MYSM1	0.100232	0.448687	0.692557	None	None	0.348056
AL136985.3	-2.39396	0.557413	NA	None	None	0.253823
JUN	-1.87412	1.83333e-15	1.64022e-12	None	None	14.7368
LINC01135	-1.13726	0.0960168	0.288398	None	None	1.01765
AL136985.1	NA	NA	NA	None	None	NA
LINC02777	NA	NA	NA	None	None	NA
LINC01358	-5.04141	0.00293938	0.0305081	None	None	2.53174
AC093425.1	-3.39914	0.398854	NA	None	None	0.399186
FGGY	-0.691727	0.188609	0.425247	None	None	0.724438
AL035416.1	-3.88242	0.229255	NA	None	None	0.639681
HOOK1	-0.332762	0.2543	0.504765	None	None	0.594653
CYP2J2	-1.79246	0.000120424	0.00284954	None	None	3.91929
C1orf87	-3.89144	0.329907	NA	None	None	0.481608
LINC02778	NA	NA	NA	None	None	NA
LINC01748	-0.733644	0.234875	0.482632	None	None	0.629162
AC099792.1	NA	NA	NA	None	None	NA
NFIA	-1.0833	0.0606351	0.219037	None	None	1.21728
NFIA-AS2	-2.39396	0.557413	NA	None	None	0.253823
AC099791.3	NA	NA	NA	None	None	NA
AC099791.4	-2.39396	0.557413	NA	None	None	0.253823
TM2D1	0.152575	0.568342	0.776322	None	None	0.24539
AC099791.2	-3.38824	0.400475	NA	None	None	0.397424
PATJ	-0.113821	0.783618	0.9019	None	None	0.105896
L1TD1	-0.111497	0.866124	0.941683	None	None	0.0624197
KANK4	-0.449644	0.559283	0.771478	None	None	0.252368
USP1	-0.00766069	0.976988	0.990283	None	None	0.0101107
DOCK7	0.373423	0.0476296	0.189773	None	None	1.32212
ANGPTL3	-6.5207	0.000604375	0.00955437	None	None	3.21869
AC103923.1	-0.25234	0.795846	0.90826	None	None	0.0991712
ATG4C	0.136013	0.371076	0.625327	None	None	0.430537
LINC01739	NA	NA	NA	None	None	NA
LINC00466	-5.21304	0.118666	0.329328	None	None	0.925674
FOXD3-AS1	NA	NA	NA	None	None	NA
FOXD3	NA	NA	NA	None	None	NA
ALG6	-0.0318946	0.931127	0.9714	None	None	0.0309909
ITGB3BP	-0.79717	0.10235	0.300276	None	None	0.989911
BX004807.1	-1.08204	0.0966639	0.289468	None	None	1.01474
EFCAB7	-1.76268	0.00434945	0.0398365	None	None	2.36157
DLEU2L	-3.38824	0.400475	NA	None	None	0.397424
PGM1	0.203414	0.426078	0.673209	None	None	0.370511
ROR1	-0.0700118	0.904619	0.959033	None	None	0.0435345
ROR1-AS1	-1.54558	0.323506	0.578199	None	None	0.490118
UBE2U	0.859073	0.805371	NA	None	None	0.0940038
CACHD1	1.21646	0.760196	NA	None	None	0.119075
RAVER2	-0.362535	0.683461	0.849376	None	None	0.165286
JAK1	0.293878	0.417383	0.66597	None	None	0.379465
AK4	-0.653658	0.00764963	0.0582339	None	None	2.11636
DNAJC6	0.239075	0.390382	0.643321	None	None	0.40851
AL139294.1	-0.744009	0.0344544	0.155306	None	None	1.46276
LEPROT	0.260206	0.117207	0.326891	None	None	0.931045
LEPR	0.346496	0.238573	0.487103	None	None	0.622378
AC119800.1	NA	NA	NA	None	None	NA
PDE4B	-0.570369	0.603523	0.799531	None	None	0.219306
AL590783.1	-1.34922	0.265795	0.51867	None	None	0.575453
SGIP1	-1.55367	0.418538	0.666737	None	None	0.378265
AL139147.1	NA	NA	NA	None	None	NA
WDR78	-0.55255	0.241696	0.491237	None	None	0.61673
MIER1	0.21044	0.230342	0.476404	None	None	0.637628
SLC35D1	-0.0537077	0.931903	0.971701	None	None	0.0306294
C1orf141	NA	NA	NA	None	None	NA
IL23R	NA	NA	NA	None	None	NA
IL12RB2	0.0365369	0.954581	0.981619	None	None	0.0201873
SERBP1	0.325543	0.0373489	0.163683	None	None	1.42772
GADD45A	0.215236	0.548376	0.765146	None	None	0.260922
GNG12	0.95796	0.000923032	0.0131678	None	None	3.03478
GNG12-AS1	1.03147	0.00556851	0.0474688	None	None	2.25426
DIRAS3	NA	NA	NA	None	None	NA
WLS	1.86607	0.00142721	0.0178525	None	None	2.84551
RPE65	NA	NA	NA	None	None	NA
DEPDC1	-0.289763	0.679159	0.846943	None	None	0.168029
AL138789.1	-3.99999	0.315837	NA	None	None	0.500538
DEPDC1-AS1	NA	NA	NA	None	None	NA
AL033530.1	0.192673	0.850427	0.935251	None	None	0.0703628
AL691520.1	NA	NA	NA	None	None	NA
LINC01707	1.11236	0.780476	NA	None	None	0.107641
AL359894.1	NA	NA	NA	None	None	NA
LRRC7	-0.681631	0.0479038	0.190682	None	None	1.31963
LRRC40	-0.317451	0.383126	0.636555	None	None	0.416659
SRSF11	-0.022701	0.894579	0.954076	None	None	0.0483811
AL353771.1	-2.39396	0.557413	NA	None	None	0.253823
ANKRD13C	0.679185	3.80039e-10	1.08184e-07	None	None	9.42017
HHLA3	0.311313	0.299759	0.553004	None	None	0.523227
AL158839.1	-3.0838	0.108256	0.311521	None	None	0.965547
CTH	0.787603	0.0832181	0.263927	None	None	1.07978
LINC01788	NA	NA	NA	None	None	NA
PTGER3	0.923897	0.637737	0.822305	None	None	0.195358
ZRANB2-AS1	-0.821082	0.00376382	0.0360238	None	None	2.42437
ZRANB2	0.0447623	0.700463	0.858467	None	None	0.154615
ZRANB2-AS2	-0.772419	0.0628498	0.22338	None	None	1.2017
NEGR1	-5.07362	0.000751619	0.0113516	None	None	3.124
AL513166.1	-5.59219	0.0153884	0.0921678	None	None	1.81281
AL583808.1	-2.01135	0.441752	0.685774	None	None	0.354822
LINC02796	NA	NA	NA	None	None	NA
LINC02797	-3.40999	0.397246	NA	None	None	0.400941
AL591463.1	NA	NA	NA	None	None	NA
LRRIQ3	-3.03429	0.183428	NA	None	None	0.736535
FPGT	-0.758996	0.0381509	0.165844	None	None	1.4185
TNNI3K	-0.988628	0.10233	0.300276	None	None	0.989999
AC093158.1	-5.39785	0.170438	0.400924	None	None	0.768435
ERICH3	NA	NA	NA	None	None	NA
CRYZ	-0.529049	0.221716	0.466817	None	None	0.654203
TYW3	0.56591	0.0651488	0.227893	None	None	1.18609
SLC44A5	0.371256	0.401396	0.652091	None	None	0.396427
ACADM	-0.779084	0.186469	0.422957	None	None	0.729394
RABGGTB	0.0481403	0.847424	0.933697	None	None	0.0718991
MSH4	-0.817643	0.133112	0.351829	None	None	0.875783
ASB17	NA	NA	NA	None	None	NA
AC092813.1	-1.45163	0.721844	NA	None	None	0.141556
ST6GALNAC3	0.369539	0.860673	0.939674	None	None	0.065162
ST6GALNAC5	1.33476	0.641138	0.824992	None	None	0.193048
AL035409.1	NA	NA	NA	None	None	NA
PIGK	0.229567	0.547181	0.764174	None	None	0.261869
AK5	0.929493	0.245239	0.495169	None	None	0.610411
AC118549.1	0.699369	1.5992e-05	0.000581156	None	None	4.7961
USP33	0.797474	0.000496074	0.0082189	None	None	3.30445
MIGA1	0.577892	0.00321186	0.0324607	None	None	2.49324
NEXN-AS1	0.296125	0.466958	0.706321	None	None	0.330722
NEXN	0.647069	0.0727152	0.245406	None	None	1.13837
FUBP1	0.568573	0.000260015	0.00508342	None	None	3.585
DNAJB4	-0.86637	0.00476221	0.0426465	None	None	2.32219
GIPC2	-0.159422	0.65563	0.83314	None	None	0.183341
AC103591.3	-1.16354	0.0916426	0.281199	None	None	1.0379
AC103591.4	NA	NA	NA	None	None	NA
AC096531.2	NA	NA	NA	None	None	NA
PTGFR	NA	NA	NA	None	None	NA
ADGRL4	-0.489849	0.90438	NA	None	None	0.0436488
AC099671.1	NA	NA	NA	None	None	NA
AL606519.1	NA	NA	NA	None	None	NA
AL136234.1	0.901095	0.044704	0.182547	None	None	1.34965
LINC01781	-0.464128	0.544293	0.762498	None	None	0.264167
ADGRL2	1.01329	0.0403254	0.171799	None	None	1.39442
AL157944.1	-0.357908	0.457893	0.699292	None	None	0.339236
LINC01362	-0.730922	0.0809392	0.259879	None	None	1.09184
AC116099.1	NA	NA	NA	None	None	NA
LINC01712	NA	NA	NA	None	None	NA
LINC01725	0.205568	0.768163	0.893853	None	None	0.114547
AL035706.1	NA	NA	NA	None	None	NA
TTLL7	-0.324281	0.650504	0.82981	None	None	0.18675
AL359504.2	0.358948	0.868969	0.943098	None	None	0.0609955
PRKACB	-0.357813	0.601083	0.798215	None	None	0.221066
SAMD13	-4.03587	0.158989	0.386855	None	None	0.798633
DNASE2B	NA	NA	NA	None	None	NA
RPF1	-0.0817488	0.762693	0.891414	None	None	0.11765
GNG5	-0.120506	0.521099	0.747245	None	None	0.28308
SPATA1	-1.29272	9.27614e-07	6.26907e-05	None	None	6.03263
CTBS	-0.281403	0.315863	0.570125	None	None	0.500501
AL359762.1	-2.70629	0.105823	0.30668	None	None	0.97542
SSX2IP	-0.0951939	0.901069	0.957406	None	None	0.0452419
LPAR3	-1.359	0.306849	0.560315	None	None	0.513075
MCOLN2	2.70108	0.225046	0.47011	None	None	0.647728
WDR63	-1.58301	0.250177	0.500036	None	None	0.601753
MCOLN3	-1.39648	0.731867	NA	None	None	0.135568
SYDE2	-0.22597	0.512363	0.740881	None	None	0.290423
C1orf52	-0.00639342	0.981004	0.991772	None	None	0.00832942
BCL10	-0.695014	0.0062723	0.0514603	None	None	2.20257
AL078459.1	-0.600314	0.222027	0.46718	None	None	0.653594
DDAH1	-0.441201	0.593838	0.793301	None	None	0.226332
AC092807.2	NA	NA	NA	None	None	NA
CCN1	-0.711254	0.157448	0.384623	None	None	0.802862
ZNHIT6	-0.530398	0.30356	0.557274	None	None	0.517756
LINC02795	-0.489849	0.90438	NA	None	None	0.0436488
ODF2L	-0.401049	0.330903	0.586124	None	None	0.480299
CLCA2	NA	NA	NA	None	None	NA
CLCA1	NA	NA	NA	None	None	NA
CLCA4	NA	NA	NA	None	None	NA
CLCA4-AS1	-0.695234	0.524661	0.750054	None	None	0.280121
AL049597.2	NA	NA	NA	None	None	NA
SH3GLB1	-0.196873	0.492713	0.726502	None	None	0.307406
AL355981.1	NA	NA	NA	None	None	NA
SELENOF	0.449307	0.00262479	0.028212	None	None	2.5809
HS2ST1	0.267077	0.117708	0.327633	None	None	0.929193
AL121989.1	-0.206446	0.63116	0.817168	None	None	0.19986
LINC01140	1.13609	0.354758	0.609028	None	None	0.450067
LINC02801	-1.27879	0.224122	0.469146	None	None	0.649516
LMO4	-0.724637	0.00223825	0.0251208	None	None	2.65009
LINC01364	-1.85777	0.0917354	0.281409	None	None	1.03746
PKN2-AS1	-0.634019	0.0646719	0.226647	None	None	1.18928
PKN2	-0.595108	0.0613095	0.220094	None	None	1.21247
GTF2B	-0.303036	0.0471709	0.188764	None	None	1.32633
KYAT3	-0.00833883	0.972278	0.988168	None	None	0.0122096
RBMXL1	-0.00756181	0.974382	0.989114	None	None	0.0112707
GBP3	-0.65324	0.385714	0.639098	None	None	0.413735
GBP1	-0.719014	0.333235	0.588262	None	None	0.477249
GBP2	-0.529493	0.207759	0.449884	None	None	0.68244
AC104459.1	-4.72468	0.168995	0.39928	None	None	0.772127
GBP7	-2.39396	0.557413	NA	None	None	0.253823
GBP4	-5.37893	0.113489	0.320833	None	None	0.945047
GBP5	NA	NA	NA	None	None	NA
GBP6	NA	NA	NA	None	None	NA
AL596214.1	0.147884	0.935329	0.972817	None	None	0.0290354
LRRC8B	-0.0774146	0.9019	0.95761	None	None	0.0448414
LRRC8C-DT	-1.10738	0.0516563	0.198025	None	None	1.28688
LRRC8C	-0.832515	0.147024	0.371625	None	None	0.832611
AC099568.2	1.37754	0.200784	0.44087	None	None	0.697271
LRRC8D	-0.289542	0.306651	0.560216	None	None	0.513355
AL391497.1	NA	NA	NA	None	None	NA
ZNF326	-0.244806	0.212219	0.45526	None	None	0.673216
AL161797.1	NA	NA	NA	None	None	NA
AC098656.1	NA	NA	NA	None	None	NA
AL627316.1	NA	NA	NA	None	None	NA
LINC02609	-0.316623	0.682229	0.848618	None	None	0.16607
LINC02788	-5.99567	0.041047	0.173382	None	None	1.38672
LINC01763	NA	NA	NA	None	None	NA
ZNF644	0.194274	0.502022	0.733262	None	None	0.299277
HFM1	-0.56847	0.394279	0.64634	None	None	0.404197
CDC7	0.011331	0.967063	0.986529	None	None	0.014545
TGFBR3	0.749717	5.86284e-06	0.000273655	None	None	5.23189
BRDT	-0.314023	0.598865	0.796542	None	None	0.222671
EPHX4	0.255183	0.752986	0.886243	None	None	0.123213
BTBD8	-0.368763	0.209148	0.451249	None	None	0.679546
AC104836.1	NA	NA	NA	None	None	NA
C1orf146	-2.99342	0.349607	NA	None	None	0.456419
GLMN	0.521872	0.0124929	0.0810484	None	None	1.90334
RPAP2	0.170718	0.466691	0.706143	None	None	0.330971
GFI1	-1.39648	0.731867	NA	None	None	0.135568
EVI5	0.513468	5.20103e-06	0.000249916	None	None	5.28391
RPL5	0.157318	0.622633	0.812194	None	None	0.205768
DIPK1A	0.339264	0.045652	0.185091	None	None	1.34054
AC093577.1	0.391271	0.922935	NA	None	None	0.034829
MTF2	0.147689	0.267045	0.520027	None	None	0.573415
TMED5	0.203634	0.408575	0.657951	None	None	0.388728
CCDC18	-0.741489	0.000205621	0.00429755	None	None	3.68693
CCDC18-AS1	-0.669917	0.0170865	0.0988363	None	None	1.76735
DR1	0.554148	0.0251164	0.126345	None	None	1.60004
FNBP1L	-0.533873	0.217707	0.461709	None	None	0.662128
BCAR3	-0.637068	0.053995	0.204116	None	None	1.26765
AL109613.1	-1.59081	0.00252127	0.0273181	None	None	2.59838
AL049796.1	-3.64303	0.0111181	0.0749504	None	None	1.95397
DNTTIP2	0.208438	0.464865	0.704534	None	None	0.332673
GCLM	0.521306	0.314396	0.568679	None	None	0.502523
ABCA4	-0.163688	0.858212	0.938954	None	None	0.0664054
ARHGAP29	0.585976	0.221756	0.466817	None	None	0.654125
ARHGAP29-AS1	-2.31394	0.149447	0.375047	None	None	0.825513
AC118469.2	NA	NA	NA	None	None	NA
ABCD3	0.535117	0.00268735	0.0286712	None	None	2.57068
F3	-1.96812	0.024991	0.126116	None	None	1.60222
SLC44A3	-1.99985	1.5752e-22	7.39872e-19	None	None	21.8027
CNN3	-0.701873	4.20226e-06	0.000208317	None	None	5.37652
AC105942.1	-2.86695	0.00890153	0.0643734	None	None	2.05054
ALG14	0.097663	0.721097	0.870524	None	None	0.142006
AC095033.1	NA	NA	NA	None	None	NA
TLCD4	0.0519196	0.942305	0.975778	None	None	0.0258086
AC092802.1	-0.593001	0.600796	0.797996	None	None	0.221273
RWDD3	-0.508541	0.260381	0.512268	None	None	0.58439
AC092802.2	-4.44729	0.0044007	0.0401947	None	None	2.35648
LINC02607	NA	NA	NA	None	None	NA
LINC01787	NA	NA	NA	None	None	NA
PTBP2	-0.130253	0.587113	0.788754	None	None	0.231279
DPYD	-1.2115	0.414476	0.663468	None	None	0.382501
DPYD-AS1	NA	NA	NA	None	None	NA
SNX7	-0.154751	0.654161	0.831859	None	None	0.184316
PLPPR5	NA	NA	NA	None	None	NA
AL445433.2	NA	NA	NA	None	None	NA
PLPPR4	NA	NA	NA	None	None	NA
LINC01708	1.61469	0.144445	0.368327	None	None	0.840298
PALMD	-0.300575	0.712838	0.86607	None	None	0.147009
FRRS1	-0.0089656	0.98038	0.991676	None	None	0.00860543
AGL	-0.173791	0.454024	0.696173	None	None	0.342921
AC118553.1	-4.9919	0.151125	0.377218	None	None	0.820665
SLC35A3	-0.218706	0.427	0.674162	None	None	0.369573
MFSD14A	-0.0895204	0.526117	0.751019	None	None	0.278918
AC093019.2	-0.720657	0.00533269	0.0459168	None	None	2.27305
SASS6	-0.111832	0.656458	0.833685	None	None	0.182793
TRMT13	0.144202	0.441521	0.685676	None	None	0.355048
LRRC39	-0.440199	0.204235	0.44632	None	None	0.689871
DBT	0.0973021	0.799908	0.910498	None	None	0.0969599
AL445928.2	-0.574569	0.0771426	0.25303	None	None	1.11271
RTCA-AS1	-1.21381	0.0126887	0.0818105	None	None	1.89658
RTCA	-0.729233	0.26105	0.512837	None	None	0.583276
CDC14A	0.928383	0.000318651	0.00586368	None	None	3.49668
AL589990.1	0.108114	0.853145	0.936458	None	None	0.0689772
EXTL2	0.456819	0.113028	0.320248	None	None	0.946814
AC104506.1	-0.369405	0.429418	0.676427	None	None	0.36712
SLC30A7	0.563116	0.00874332	0.0636878	None	None	2.05832
DPH5	-0.412609	0.272416	0.525586	None	None	0.564767
AC093157.2	NA	NA	NA	None	None	NA
AC093157.1	0.173308	0.646323	0.827526	None	None	0.18955
LINC01307	-2.39396	0.557413	NA	None	None	0.253823
LINC01709	NA	NA	NA	None	None	NA
OLFM3	-3.9773	0.318744	NA	None	None	0.496559
AC114485.1	-2.15463	0.167329	0.397243	None	None	0.776429
AC099567.1	-3.53714	0.00102397	0.0140941	None	None	2.98971
AC095032.2	NA	NA	NA	None	None	NA
AC095032.1	-0.470046	0.411639	0.660619	None	None	0.385484
RNPC3	-0.0407072	0.807314	0.914551	None	None	0.0929573
AMY2B	0.0245164	0.970005	0.987859	None	None	0.013226
AL591888.1	-0.489849	0.90438	NA	None	None	0.0436488
LINC01677	NA	NA	NA	None	None	NA
AL355306.2	NA	NA	NA	None	None	NA
PRMT6	0.769139	0.17117	0.402094	None	None	0.766572
NTNG1	-0.0134179	0.99165	0.995887	None	None	0.00364141
VAV3	0.547311	0.000128331	0.00299142	None	None	3.89167
VAV3-AS1	NA	NA	NA	None	None	NA
SLC25A24	0.295876	0.304791	0.558475	None	None	0.515997
AL359258.2	NA	NA	NA	None	None	NA
NBPF4	NA	NA	NA	None	None	NA
AL359258.1	NA	NA	NA	None	None	NA
AL390038.1	NA	NA	NA	None	None	NA
NBPF6	-5.85823	0.135986	0.35653	None	None	0.866507
FAM102B	0.680267	0.0310028	0.14504	None	None	1.5086
HENMT1	0.0153679	0.978484	0.99089	None	None	0.00944605
AL160171.1	-5.01934	0.0313941	0.14647	None	None	1.50315
PRPF38B	0.487136	0.00480885	0.0429414	None	None	2.31796
FNDC7	4.94591	0.0412832	0.173674	None	None	1.38423
STXBP3	0.537451	0.0073305	0.0567542	None	None	2.13487
AKNAD1	0.616136	0.00169936	0.0204479	None	None	2.76972
SPATA42	NA	NA	NA	None	None	NA
GPSM2	1.20218	3.03572e-09	5.48415e-07	None	None	8.51774
CLCC1	-0.0237882	0.950913	0.979909	None	None	0.021859
WDR47	0.357808	0.157802	0.385136	None	None	0.801889
TAF13	0.363009	0.144385	0.368327	None	None	0.840479
AL356488.3	-0.168355	0.774783	0.896906	None	None	0.11082
TMEM167B	-0.368918	0.108776	0.312441	None	None	0.963468
AL356488.2	-6.10844	0.0339593	0.154262	None	None	1.46904
C1orf194	-3.82829	0.0174925	0.100474	None	None	1.75715
KIAA1324	0.646098	0.287891	0.541106	None	None	0.540772
SARS	-0.0245224	0.918597	0.965791	None	None	0.036875
CELSR2	-0.168744	0.915224	0.964448	None	None	0.0384728
PSRC1	-3.41802	0.011286	0.075729	None	None	1.94746
MYBPHL	-5.42393	0.0883783	0.274274	None	None	1.05365
SORT1	0.115373	0.746274	0.883992	None	None	0.127102
PSMA5	0.43301	0.00402836	0.0376541	None	None	2.39487
SYPL2	2.07432	0.270006	0.523462	None	None	0.568627
ATXN7L2	-1.23214	0.42553	0.672741	None	None	0.37107
CYB561D1	-0.396206	0.147074	0.3717	None	None	0.832465
AMIGO1	NA	NA	NA	None	None	NA
GPR61	-3.40999	0.397246	NA	None	None	0.400941
AL355310.3	NA	NA	NA	None	None	NA
GNAI3	-0.00643133	0.965097	0.985608	None	None	0.0154292
AL355310.1	NA	NA	NA	None	None	NA
GNAT2	NA	NA	NA	None	None	NA
AMPD2	0.163141	0.672259	0.843095	None	None	0.172463
AL355310.2	NA	NA	NA	None	None	NA
GSTM4	-6.10665	0.0346216	0.155876	None	None	1.46065
GSTM1	NA	NA	NA	None	None	NA
AC000032.1	NA	NA	NA	None	None	NA
GSTM5	-2.39396	0.557413	NA	None	None	0.253823
AL158847.1	NA	NA	NA	None	None	NA
GSTM3	-0.0977876	0.905392	0.95942	None	None	0.0431632
EPS8L3	NA	NA	NA	None	None	NA
LINC01768	-2.39396	0.557413	NA	None	None	0.253823
CSF1	NA	NA	NA	None	None	NA
AHCYL1	0.0882104	0.688486	0.851806	None	None	0.162105
STRIP1	0.100228	0.59752	0.795733	None	None	0.223648
AL160006.1	-0.354478	0.526534	0.751197	None	None	0.278574
ALX3	-6.73065	0.011068	0.0746665	None	None	1.95593
LINC01397	NA	NA	NA	None	None	NA
SLC6A17	-0.434706	0.915059	NA	None	None	0.0385511
KCNC4	-0.610109	0.7225	0.870701	None	None	0.141162
RBM15-AS1	-1.69441	0.32719	0.58229	None	None	0.4852
RBM15	-0.435315	0.0459907	0.185587	None	None	1.33733
LAMTOR5-AS1	-0.212181	0.333001	0.588182	None	None	0.477554
SLC16A4	-0.218689	0.366813	0.621159	None	None	0.435555
AL355488.1	-0.346906	0.507804	0.737467	None	None	0.294304
LAMTOR5	-0.107708	0.703197	0.860242	None	None	0.152923
CD53	3.63699	0.0932266	0.284065	None	None	1.03046
AL360270.2	-0.24036	0.896009	0.954753	None	None	0.0476877
AL360270.1	-0.387051	0.302405	0.555874	None	None	0.519411
LRIF1	0.0533653	0.787225	0.903945	None	None	0.103901
AL360270.3	-2.39396	0.557413	NA	None	None	0.253823
DRAM2	0.0710654	0.812238	0.917468	None	None	0.090317
CEPT1	-0.00982897	0.971052	0.987859	None	None	0.0127576
AL355816.1	-0.489849	0.90438	NA	None	None	0.0436488
AL355816.2	0.976582	0.16873	0.399055	None	None	0.772808
DENND2D	0.47535	0.00997677	0.0695365	None	None	2.00101
CHI3L2	0.631498	0.432637	0.67878	None	None	0.363876
CHIA	NA	NA	NA	None	None	NA
PIFO	-4.65536	0.00112758	0.015157	None	None	2.94785
OVGP1	0.49857	0.0894323	0.276494	None	None	1.04851
AL390195.2	1.53034	0.147865	0.372798	None	None	0.830134
AL390195.1	1.57792	0.145968	0.370192	None	None	0.835741
WDR77	1.02347	0.000122502	0.0028878	None	None	3.91186
ATP5PB	0.427892	0.0689579	0.236939	None	None	1.16142
C1orf162	-3.15412	0.0996397	0.295506	None	None	1.00157
TMIGD3	-3.06076	0.17707	NA	None	None	0.751855
RAP1A	0.627234	0.0046874	0.0422216	None	None	2.32907
INKA2	-0.239963	0.429455	0.676427	None	None	0.367082
INKA2-AS1	-1.39648	0.731867	NA	None	None	0.135568
AL049557.1	NA	NA	NA	None	None	NA
DDX20	0.127859	0.665046	0.839151	None	None	0.177148
AL445426.1	NA	NA	NA	None	None	NA
CTTNBP2NL	0.364468	0.0870953	0.271323	None	None	1.06001
WNT2B	0.358439	0.241873	0.491323	None	None	0.616413
AL354760.1	NA	NA	NA	None	None	NA
ST7L	0.142799	0.619711	0.810972	None	None	0.207811
CAPZA1	-0.117655	0.37097	0.625232	None	None	0.430661
MOV10	-0.290253	0.368502	0.622945	None	None	0.433561
AL603832.1	-5.73505	0.0631228	0.223765	None	None	1.19981
RHOC	-0.136906	0.764378	0.892444	None	None	0.116692
PPM1J	NA	NA	NA	None	None	NA
TAFA3	NA	NA	NA	None	None	NA
LINC01356	1.09841	0.170204	0.400924	None	None	0.769031
LINC01357	0.146601	0.684264	0.849644	None	None	0.164776
SLC16A1	-0.0670314	0.770079	0.895095	None	None	0.113465
SLC16A1-AS1	-0.448266	0.196387	0.435211	None	None	0.706887
AL390242.1	-1.34519	0.0509384	0.196731	None	None	1.29295
LRIG2-DT	-0.666549	0.181842	0.417914	None	None	0.740306
LRIG2	0.0112043	0.946268	0.977611	None	None	0.0239858
MAGI3	-0.492542	0.234695	0.482632	None	None	0.629497
PHTF1	-0.269253	0.319546	0.57473	None	None	0.495467
RSBN1	-0.195134	0.285072	0.538076	None	None	0.545045
AL137856.1	-4.16333	0.0120264	0.079226	None	None	1.91986
PTPN22	-1.35072	0.412218	0.661323	None	None	0.384873
AP4B1-AS1	-4.35994	0.00770828	0.0585617	None	None	2.11304
BCL2L15	0.320942	0.936825	NA	None	None	0.0283415
AP4B1	-0.413262	0.779234	0.898899	None	None	0.108332
DCLRE1B	-3.41537	0.0143609	0.0884753	None	None	1.84282
HIPK1-AS1	-5.98981	0.0425384	0.176581	None	None	1.37122
HIPK1	-0.016817	0.92962	0.970762	None	None	0.0316946
OLFML3	NA	NA	NA	None	None	NA
TRIM33	0.890468	0.000734888	0.0111513	None	None	3.13378
BCAS2	-0.308234	0.16936	0.399489	None	None	0.77119
DENND2C	0.472707	0.27083	0.523949	None	None	0.567303
AMPD1	-0.434706	0.915059	NA	None	None	0.0385511
NRAS	-0.303806	0.193539	0.431444	None	None	0.713232
CSDE1	0.330978	0.0287066	0.138186	None	None	1.54202
SIKE1	-0.00730563	0.973707	0.989026	None	None	0.0115716
SYCP1	NA	NA	NA	None	None	NA
TSPAN2	-5.76819	0.0100203	0.0697003	None	None	1.99912
LINC01765	NA	NA	NA	None	None	NA
AL049825.1	NA	NA	NA	None	None	NA
NGF-AS1	-2.61885	0.108173	0.311329	None	None	0.965881
NGF	0.295061	0.736427	0.879034	None	None	0.13287
AL512638.3	NA	NA	NA	None	None	NA
VANGL1	-0.414651	0.565293	0.77484	None	None	0.247726
SLC22A15	-0.78274	0.309223	0.562789	None	None	0.509729
AL365318.1	-2.39396	0.557413	NA	None	None	0.253823
MAB21L3	-0.418162	0.516527	0.743933	None	None	0.286907
ATP1A1-AS1	1.00409	0.00319369	0.0323467	None	None	2.49571
LINC01762	1.54826	0.000308824	0.00574473	None	None	3.51029
AL390066.1	NA	NA	NA	None	None	NA
CD58	0.463089	0.173012	0.404298	None	None	0.761923
IGSF3	-0.454329	0.0390432	0.168398	None	None	1.40846
C1orf137	NA	NA	NA	None	None	NA
PTGFRN	1.91455	2.39272e-05	0.000787294	None	None	4.62111
CD101	2.98145	0.00963306	0.0680398	None	None	2.01624
AL445231.1	-1.28214	0.61727	0.809357	None	None	0.209525
TTF2	0.599009	0.0553166	0.207304	None	None	1.25714
TRIM45	0.0648184	0.918483	0.965791	None	None	0.0369289
VTCN1	-1.71326	0.299414	0.552497	None	None	0.523728
LINC01525	-2.01105	0.27596	0.529109	None	None	0.559154
AL358072.1	-4.2513	0.00293624	0.0305081	None	None	2.53221
MAN1A2	1.11278	1.08841e-15	1.17929e-12	None	None	14.9632
AL157902.1	-0.434706	0.915059	NA	None	None	0.0385511
TENT5C	-1.5268	0.00244749	0.026688	None	None	2.61128
GDAP2	0.633736	0.000102725	0.00249355	None	None	3.98832
WDR3	0.768105	0.00174376	0.0208409	None	None	2.75851
SPAG17	0.42508	0.351794	0.606479	None	None	0.453712
AL391557.1	NA	NA	NA	None	None	NA
TBX15	1.22717	0.38661	0.640024	None	None	0.412727
WARS2	0.501534	0.00829082	0.0614712	None	None	2.0814
WARS2-IT1	-0.100772	0.808873	0.915296	None	None	0.0921195
WARS2-AS1	0.512858	0.0368606	0.162262	None	None	1.43344
AL359915.1	-0.200021	0.695839	0.855591	None	None	0.157491
LINC01780	NA	NA	NA	None	None	NA
HSD3B1	0.325882	0.0542873	0.204768	None	None	1.2653
LINC00622	-2.96684	0.285148	0.538076	None	None	0.544929
ZNF697	0.698443	0.000620354	0.00974516	None	None	3.20736
PHGDH	0.176329	0.557814	0.770646	None	None	0.253511
HMGCS2	1.05621	0.791463	NA	None	None	0.101569
NOTCH2	0.922148	0.00381553	0.0363336	None	None	2.41845
SEC22B	-0.0440778	0.795216	0.908017	None	None	0.0995149
NBPF26	0.452068	0.333707	0.588593	None	None	0.476634
AC253572.2	-7.09979	4.33585e-07	3.39425e-05	None	None	6.36293
LINC00623	0.188032	0.688511	0.851806	None	None	0.162089
FCGR1B	NA	NA	NA	None	None	NA
AC244453.3	-3.15093	0.161726	0.390453	None	None	0.791221
AC244453.2	NA	NA	NA	None	None	NA
AC244453.1	NA	NA	NA	None	None	NA
FAM72B	-2.62526	0.289343	NA	None	None	0.538587
SRGAP2C	-0.189151	0.381571	0.634926	None	None	0.418425
SRGAP2-AS1	-1.12165	0.00675274	0.0541257	None	None	2.17052
LINC02798	-0.812968	0.195941	0.434685	None	None	0.707874
AL592494.2	NA	NA	NA	None	None	NA
AC239800.2	NA	NA	NA	None	None	NA
LINC02591	-1.44565	0.474125	0.711316	None	None	0.324107
HIST2H3PS2	-0.805812	0.534182	0.755881	None	None	0.27231
AC246680.1	NA	NA	NA	None	None	NA
FAM72C	NA	NA	NA	None	None	NA
LINC02802	-0.529963	0.1705	0.401022	None	None	0.768274
AC246785.3	NA	NA	NA	None	None	NA
NBPF15	-0.851806	0.265171	0.518086	None	None	0.576473
FP700111.1	-1.03556	0.34367	0.598443	None	None	0.463858
SRGAP2B	-0.261556	0.496069	0.728535	None	None	0.304458
FAM72D	-3.98489	0.317769	NA	None	None	0.497888
AC245014.3	-5.72786	0.0613844	0.220094	None	None	1.21194
NBPF20	-4.25851	0.129136	0.345391	None	None	0.888953
AC239860.4	-2.24514	0.258009	0.509355	None	None	0.588365
GPR89A	-0.176653	0.512467	0.74095	None	None	0.290334
CD160	-5.66096	0.0011335	0.0152115	None	None	2.94558
RNF115	-0.313936	0.334455	0.589248	None	None	0.475662
POLR3C	-0.00473632	0.985658	0.993993	None	None	0.00627393
NUDT17	-4.23038	0.000344316	0.0062202	None	None	3.46304
PIAS3	-0.24268	0.446673	0.690258	None	None	0.350011
ANKRD35	NA	NA	NA	None	None	NA
ITGA10	-3.40298	0.263169	NA	None	None	0.579766
PEX11B	-0.602391	0.266525	0.519394	None	None	0.574261
RBM8A	-0.117205	0.468037	0.707316	None	None	0.32972
LIX1L-AS1	-0.211509	0.551044	0.767302	None	None	0.258814
LIX1L	-5.20984	0.123071	0.336295	None	None	0.909845
ANKRD34A	-4.00175	0.147713	0.372463	None	None	0.830582
POLR3GL	-1.05207	0.345627	0.600413	None	None	0.461393
TXNIP	NA	NA	NA	None	None	NA
HJV	1.39454	0.725814	NA	None	None	0.139175
AC239799.2	-1.32232	0.00499462	0.0438091	None	None	2.3015
LINC01719	-0.338422	0.47762	0.714396	None	None	0.320918
NBPF10	0.701585	0.116821	0.326371	None	None	0.932477
NOTCH2NLA	0.43789	0.305304	0.558865	None	None	0.515267
AC239799.1	NA	NA	NA	None	None	NA
AC245407.2	-0.698528	0.184876	0.42074	None	None	0.733121
NBPF12	-0.071416	0.88498	0.950413	None	None	0.0530668
PRKAB2	-0.695211	0.000176671	0.00384334	None	None	3.75283
AC242426.2	-0.288142	0.478871	0.715412	None	None	0.319782
FMO5	-1.09999	0.000888026	0.0128439	None	None	3.05157
CHD1L	-1.90964	0.633655	NA	None	None	0.198147
LINC00624	-0.20365	0.495246	0.727952	None	None	0.305179
BCL9	-0.231746	0.441999	0.686001	None	None	0.354578
ACP6	-0.295984	0.256086	0.506937	None	None	0.591614
GJA5	1.229	0.00483495	0.0430925	None	None	2.31561
GPR89B	-0.124291	0.66666	0.839941	None	None	0.176096
AC239803.1	NA	NA	NA	None	None	NA
LINC02804	-3.78852	0.0222241	0.116992	None	None	1.65318
NBPF11	-0.333724	0.0842775	0.265583	None	None	1.07429
LINC02805	-2.01448	0.273858	0.527231	None	None	0.562474
AC239809.3	-0.976313	0.316725	0.571077	None	None	0.499318
LINC01731	1.59894	0.196612	0.435505	None	None	0.706389
LINC01138	-0.191154	0.348962	0.603811	None	None	0.457222
LINC02806	1.99418	0.100453	0.296708	None	None	0.998037
AC245100.1	0.626617	0.47936	0.715631	None	None	0.319338
PPIAL4G	NA	NA	NA	None	None	NA
NBPF14	0.64658	0.053972	0.20407	None	None	1.26783
NUDT4B	NA	NA	NA	None	None	NA
PDE4DIP	0.537936	0.00275837	0.0292132	None	None	2.55935
AC239802.2	-5.21592	0.0458687	0.185416	None	None	1.33848
AC239804.1	NA	NA	NA	None	None	NA
NBPF9	0.0645022	0.885937	0.950816	None	None	0.052597
AC245297.3	-0.329808	0.256608	0.50781	None	None	0.59073
AC245297.2	NA	NA	NA	None	None	NA
NOTCH2NLC	0.637701	0.0113944	0.0763202	None	None	1.94331
NBPF19	0.106071	0.779779	0.899245	None	None	0.108028
AC242842.1	NA	NA	NA	None	None	NA
FCGR1A	-3.39914	0.398854	NA	None	None	0.399186
HIST2H2BF	0.250991	0.407487	0.657363	None	None	0.389887
AC243772.2	-0.470702	0.671395	0.842621	None	None	0.173022
HIST2H3D	NA	NA	NA	None	None	NA
HIST2H4A	NA	NA	NA	None	None	NA
HIST2H2AA4	0.0771688	0.841461	0.931152	None	None	0.0749659
HIST2H4B	-4.63564	0.0765106	0.252356	None	None	1.11628
AC239868.1	-3.46601	0.231409	0.477875	None	None	0.635621
HIST2H2BE	0.270622	0.158218	0.385754	None	None	0.800745
HIST2H2AC	-0.386166	0.109757	0.314347	None	None	0.959567
HIST2H2AB	-4.58857	0.0719717	0.243743	None	None	1.14284
BOLA1	0.413932	0.222217	0.467369	None	None	0.653223
SV2A	-3.43328	0.0780844	0.254519	None	None	1.10744
SF3B4	0.415603	0.133654	0.352898	None	None	0.87402
MTMR11	-0.296777	0.412901	0.66174	None	None	0.384154
OTUD7B	0.0772898	0.689551	0.852336	None	None	0.161434
AC244033.2	0.157962	0.771254	0.895477	None	None	0.112803
VPS45	0.117566	0.629367	0.816445	None	None	0.201096
PLEKHO1	-1.27109	0.689464	NA	None	None	0.161489
AC242988.2	NA	NA	NA	None	None	NA
ANP32E	-0.666541	0.0075408	0.057751	None	None	2.12258
AC242988.1	NA	NA	NA	None	None	NA
CA14	-3.99999	0.315837	NA	None	None	0.500538
APH1A	0.369563	0.215061	0.458622	None	None	0.667437
C1orf54	-0.339518	0.539384	0.759513	None	None	0.268102
CIART	NA	NA	NA	None	None	NA
MRPS21	0.200524	0.213644	0.456743	None	None	0.67031
PRPF3	0.257231	0.140469	0.363366	None	None	0.852421
RPRD2	0.170449	0.341177	0.595795	None	None	0.467021
TARS2	-0.0863177	0.83439	0.928209	None	None	0.078631
ECM1	0.782241	0.00567096	0.0480804	None	None	2.24634
FALEC	0.145631	0.734145	0.877704	None	None	0.134218
AL356356.1	0.111731	0.720915	0.870417	None	None	0.142116
ADAMTSL4	0.279679	0.228239	0.473986	None	None	0.64161
ADAMTSL4-AS1	0.919329	0.0191019	0.106368	None	None	1.71892
MCL1	-0.0787784	0.704838	0.861413	None	None	0.151911
ENSA	-0.0248297	0.865739	0.941399	None	None	0.0626132
GOLPH3L	-0.497856	0.0321089	0.14866	None	None	1.49337
HORMAD1	0.609849	0.87959	NA	None	None	0.0557198
CTSK	0.886988	0.00338759	0.0336752	None	None	2.47011
ARNT	1.14648	6.04005e-07	4.52114e-05	None	None	6.21896
CTXND2	1.39747	0.13226	0.350678	None	None	0.87857
SETDB1	0.349289	0.101326	0.298295	None	None	0.994278
CERS2	-0.0883176	0.754385	0.887001	None	None	0.122407
AL590133.2	NA	NA	NA	None	None	NA
AL590133.1	NA	NA	NA	None	None	NA
ANXA9	-1.85447	0.097389	0.291175	None	None	1.01149
MINDY1	-0.173175	0.653802	0.831693	None	None	0.184554
PRUNE1	0.333476	0.235221	0.482672	None	None	0.628523
BNIPL	-1.01645	0.0195803	0.108045	None	None	1.70818
C1orf56	-0.489337	0.106039	0.307129	None	None	0.974536
CDC42SE1	0.46782	0.0183001	0.103157	None	None	1.73755
MLLT11	-0.396436	0.263753	0.516136	None	None	0.578803
GABPB2	0.189553	0.664016	0.83884	None	None	0.177821
AL592424.1	NA	NA	NA	None	None	NA
TNFAIP8L2	NA	NA	NA	None	None	NA
SCNM1	-0.151178	0.609691	0.803626	None	None	0.21489
LYSMD1	-0.30632	0.417551	0.66598	None	None	0.37929
VPS72	0.358621	0.102874	0.301073	None	None	0.987695
PIP5K1A	0.470035	0.123399	0.336834	None	None	0.908687
PSMD4	0.0499842	0.772195	0.895538	None	None	0.112273
ZNF687-AS1	-0.137482	0.77192	0.895537	None	None	0.112428
ZNF687	-0.351641	0.21549	0.45906	None	None	0.666574
PI4KB	0.248503	0.127421	0.342978	None	None	0.894758
AL391069.3	NA	NA	NA	None	None	NA
RFX5	1.09422	0.284106	0.537325	None	None	0.546519
AL391069.2	NA	NA	NA	None	None	NA
SELENBP1	-5.74042	0.0772485	0.253034	None	None	1.11211
PSMB4	-0.0250788	0.931929	0.971701	None	None	0.030617
POGZ	-0.169524	0.495361	0.728064	None	None	0.305078
CGN	-1.04299	0.0942646	0.285441	None	None	1.02565
TUFT1	0.102013	0.657699	0.834459	None	None	0.181973
AL365436.2	-0.665822	0.00356769	0.0348207	None	None	2.44761
SNX27	0.404814	0.045218	0.183928	None	None	1.34469
AL391335.1	-1.29541	0.00340782	0.0338226	None	None	2.46752
CELF3	NA	NA	NA	None	None	NA
AL589765.1	NA	NA	NA	None	None	NA
RIIAD1	NA	NA	NA	None	None	NA
AL589765.7	-2.11531	0.0442748	0.181584	None	None	1.35384
MRPL9	-0.298146	0.271749	0.52479	None	None	0.565832
OAZ3	-3.74912	0.0499176	0.194662	None	None	1.30175
AL589765.4	-2.39396	0.557413	NA	None	None	0.253823
AL589765.5	NA	NA	NA	None	None	NA
TDRKH	-0.0306364	0.896636	0.955053	None	None	0.0473837
TDRKH-AS1	-0.044831	0.88818	0.95117	None	None	0.051499
AL589765.6	0.502887	0.900807	NA	None	None	0.0453685
RORC	-0.537445	0.647596	0.827803	None	None	0.188696
C2CD4D	-1.8481	0.293791	0.547434	None	None	0.531962
C2CD4D-AS1	0.278018	0.61156	0.804734	None	None	0.213561
THEM5	1.04906	0.227358	0.472776	None	None	0.643289
THEM4	-0.136164	0.678426	0.846646	None	None	0.168498
AL450992.2	-0.381443	0.472415	0.710106	None	None	0.325677
AL450992.3	NA	NA	NA	None	None	NA
S100A10	-0.966976	0.0804117	0.258872	None	None	1.09468
AL450992.1	-0.709003	0.110851	0.316179	None	None	0.95526
S100A11	-0.195582	0.333873	0.588735	None	None	0.476418
TCHHL1	-1.8515	0.537438	NA	None	None	0.269672
TCHH	-0.115696	0.889813	0.951714	None	None	0.0507014
FLG-AS1	0.611938	0.853778	0.936468	None	None	0.0686551
FLG2	NA	NA	NA	None	None	NA
SPRR3	-5.1481	0.127615	0.343156	None	None	0.894098
SPRR2D	-2.76985	0.0958626	0.288094	None	None	1.01835
PRR9	3.77589	8.82102e-06	0.000367471	None	None	5.05448
PGLYRP4	-0.0464778	0.980411	NA	None	None	0.00859169
S100A9	-1.13989	0.000598621	0.00949657	None	None	3.22285
S100A7	-0.523423	0.715667	0.867274	None	None	0.145289
S100A6	-0.180913	0.589599	0.790452	None	None	0.229443
S100A5	NA	NA	NA	None	None	NA
S100A4	0.00753139	0.99204	0.996016	None	None	0.00347061
S100A2	-2.39396	0.557413	NA	None	None	0.253823
BX470102.2	-5.33035	0.0229686	0.119539	None	None	1.63886
S100A16	-1.81358	0.215016	0.458622	None	None	0.667529
S100A14	-2.33577	0.0922201	0.282098	None	None	1.03517
S100A13	-0.571926	0.145055	0.369231	None	None	0.838467
S100A1	NA	NA	NA	None	None	NA
AL162258.2	0.255914	0.567158	0.775867	None	None	0.246296
CHTOP	-0.00141227	0.993236	0.996362	None	None	0.00294777
SNAPIN	-0.189792	0.524982	0.75018	None	None	0.279856
ILF2	0.12373	0.495979	0.728459	None	None	0.304537
NPR1	0.0137965	0.979823	0.991485	None	None	0.00885255
INTS3	-0.370677	0.177477	0.411354	None	None	0.750858
AL513523.4	-6.49914	0.0174244	0.100236	None	None	1.75884
AL513523.3	NA	NA	NA	None	None	NA
SLC27A3	-2.12206	0.0637894	0.224939	None	None	1.19525
GATAD2B	0.113951	0.370448	0.624717	None	None	0.431273
AL358472.5	-6.92092	8.18599e-05	0.00209555	None	None	4.08693
DENND4B	-0.0499513	0.83609	0.928858	None	None	0.0777468
CRTC2	0.183249	0.603213	0.799405	None	None	0.219529
SLC39A1	0.499115	0.101569	0.298635	None	None	0.993238
AL358472.4	0.00251887	0.996533	0.998126	None	None	0.00150845
AL358472.3	-2.71833	0.221024	0.466015	None	None	0.655561
CREB3L4	-0.219692	0.649226	0.828999	None	None	0.187604
JTB	0.297732	0.183867	0.420614	None	None	0.735495
AL358472.2	-6.116	0.0377305	0.164633	None	None	1.42331
RAB13	-0.766004	0.0108144	0.073483	None	None	1.966
RPS27	-0.172291	0.48384	0.719403	None	None	0.315299
NUP210L	0.238199	0.694479	0.854869	None	None	0.158341
TPM3	0.0934365	0.592568	0.792484	None	None	0.227262
C1orf189	-3.29942	0.0587725	0.215	None	None	1.23083
C1orf43	0.206745	0.218179	0.462308	None	None	0.661188
UBAP2L	0.232978	0.200619	0.440691	None	None	0.697627
HAX1	-0.694575	0.0096955	0.0682308	None	None	2.01343
ATP8B2	0.0341656	0.987779	0.994768	None	None	0.00534038
IL6R-AS1	NA	NA	NA	None	None	NA
IL6R	-1.88281	0.134818	0.354658	None	None	0.870252
SHE	NA	NA	NA	None	None	NA
TDRD10	NA	NA	NA	None	None	NA
UBE2Q1	0.447553	0.322229	0.576742	None	None	0.491836
AL592078.2	NA	NA	NA	None	None	NA
CHRNB2	NA	NA	NA	None	None	NA
ADAR	-0.156037	0.639715	0.82387	None	None	0.194014
AL606500.1	-4.37307	0.0980122	0.29248	None	None	1.00872
KCNN3	-3.07202	0.0741653	0.248248	None	None	1.1298
PMVK	0.106003	0.615353	0.807688	None	None	0.210876
AL451085.1	-4.88738	0.0677672	0.233847	None	None	1.16898
PBXIP1	-0.236914	0.409502	0.658709	None	None	0.387744
PYGO2	-0.0676617	0.815406	0.919117	None	None	0.0886262
AL451085.2	-5.3214	0.029816	0.141586	None	None	1.52555
SHC1	-0.0997374	0.647466	0.827803	None	None	0.188783
CKS1B	-0.548563	0.104788	0.305186	None	None	0.979689
FLAD1	0.286034	0.196269	0.435001	None	None	0.707148
ZBTB7B	0.0756504	0.780464	0.899703	None	None	0.107647
DCST2	-1.09454	0.0153503	0.0920819	None	None	1.81388
DCST1	-5.70571	0.0130559	0.0832633	None	None	1.88419
DCST1-AS1	NA	NA	NA	None	None	NA
ADAM15	0.322621	0.357976	0.612407	None	None	0.446146
EFNA4	0.696822	0.143309	0.367679	None	None	0.843726
SLC50A1	-0.510692	0.0902602	0.278367	None	None	1.0445
DPM3	0.620862	0.00852787	0.0625866	None	None	2.06916
KRTCAP2	0.390329	0.109573	0.314012	None	None	0.960295
TRIM46	-0.0827674	0.912722	0.963318	None	None	0.0396616
MUC1	NA	NA	NA	None	None	NA
AC234582.1	-1.67437	0.267469	0.520453	None	None	0.572726
THBS3	-0.972289	0.00207793	0.0238049	None	None	2.68237
MTX1	-0.237174	0.420073	0.667993	None	None	0.376675
AC234582.2	NA	NA	NA	None	None	NA
GBA	-0.182	0.528987	0.752865	None	None	0.276555
FAM189B	0.500577	0.194604	0.432894	None	None	0.710848
SCAMP3	0.354833	0.144723	0.368735	None	None	0.839463
CLK2	-0.377257	0.0784702	0.255356	None	None	1.1053
PKLR	NA	NA	NA	None	None	NA
FDPS	-0.91233	0.0229318	0.1195	None	None	1.63956
RUSC1-AS1	-1.26181	0.0266535	0.13185	None	None	1.57425
RUSC1	-0.163845	0.699305	0.857776	None	None	0.155333
ASH1L	0.206041	0.204222	0.44632	None	None	0.689897
ASH1L-IT1	NA	NA	NA	None	None	NA
ASH1L-AS1	0.0095333	0.979636	0.991402	None	None	0.00893505
AL353807.2	NA	NA	NA	None	None	NA
MSTO1	-0.26663	0.542355	0.76175	None	None	0.265717
AL353807.5	-0.534525	0.473908	0.711155	None	None	0.324306
YY1AP1	0.225307	0.293804	0.547434	None	None	0.531942
DAP3	0.615781	0.0124399	0.0809963	None	None	1.90518
AL162734.1	0.382568	0.746817	0.884161	None	None	0.126786
GON4L	0.361671	0.0139785	0.0869915	None	None	1.85454
SYT11	NA	NA	NA	None	None	NA
RIT1	0.0915228	0.716558	0.867503	None	None	0.144749
KHDC4	0.201573	0.282988	0.536316	None	None	0.548231
ARHGEF2	0.262209	0.521962	0.747802	None	None	0.282361
AL355388.2	NA	NA	NA	None	None	NA
AL355388.1	NA	NA	NA	None	None	NA
AL355388.3	-0.665841	0.206584	0.448757	None	None	0.684903
SSR2	0.453988	0.0741583	0.248248	None	None	1.12984
UBQLN4	0.5248	0.0861801	0.26945	None	None	1.06459
LAMTOR2	0.00419338	0.990869	0.995597	None	None	0.00398368
RAB25	0.080611	0.771856	0.895537	None	None	0.112464
MEX3A	-2.41543	0.112388	0.318916	None	None	0.94928
LMNA	0.22527	0.14059	0.363628	None	None	0.852047
SLC25A44	0.33087	0.302213	0.555684	None	None	0.519687
PMF1	0.317681	0.0918598	0.281409	None	None	1.03687
BGLAP	-4.13195	0.004167	0.0385853	None	None	2.38018
PAQR6	-6.70723	4.14059e-06	0.000206692	None	None	5.38294
SMG5	0.345486	0.0353692	0.157693	None	None	1.45137
TMEM79	-0.0808589	0.753095	0.886317	None	None	0.12315
GLMP	0.513328	0.02739	0.134256	None	None	1.56241
CCT3	0.663459	3.35433e-06	0.00017653	None	None	5.47439
TSACC	0.266181	0.424656	0.671891	None	None	0.371963
RHBG	0.0120471	0.993163	0.996362	None	None	0.00297966
C1orf61	0.129431	0.675407	0.844956	None	None	0.170435
MEF2D	-0.158619	0.398164	0.649072	None	None	0.399939
AL365181.1	NA	NA	NA	None	None	NA
IQGAP3	-0.151533	0.761239	0.890572	None	None	0.118479
NAXE	0.414896	0.206388	0.448435	None	None	0.685316
GPATCH4	0.302329	0.116843	0.326383	None	None	0.932396
HAPLN2	NA	NA	NA	None	None	NA
AL365181.2	-4.3172	0.277073	NA	None	None	0.557405
BCAN	-3.38824	0.400475	NA	None	None	0.397424
AL365181.3	-5.72141	0.0787603	0.255967	None	None	1.10369
AL590666.2	-2.97981	0.454509	NA	None	None	0.342458
NES	NA	NA	NA	None	None	NA
AL590666.3	NA	NA	NA	None	None	NA
AL590666.4	-3.15735	0.03629	0.160577	None	None	1.44021
CRABP2	-3.39133	0.204699	0.44632	None	None	0.688885
AL590666.1	NA	NA	NA	None	None	NA
ISG20L2	0.379409	0.0631896	0.223917	None	None	1.19935
RRNAD1	-0.00864225	0.964063	0.985258	None	None	0.0158946
MRPL24	0.622729	0.0369384	0.162409	None	None	1.43252
HDGF	0.468658	0.0278624	0.135827	None	None	1.55498
PRCC	0.535563	0.00170109	0.0204479	None	None	2.76927
AL590666.5	NA	NA	NA	None	None	NA
SH2D2A	NA	NA	NA	None	None	NA
NTRK1	0.068168	0.986602	NA	None	None	0.0058578
PEAR1	NA	NA	NA	None	None	NA
LRRC71	NA	NA	NA	None	None	NA
ARHGEF11	-0.321654	0.414025	0.663089	None	None	0.382974
ETV3L	NA	NA	NA	None	None	NA
ETV3	-0.467191	0.0711392	0.241737	None	None	1.14789
FCRL2	NA	NA	NA	None	None	NA
CD5L	NA	NA	NA	None	None	NA
KIRREL1	NA	NA	NA	None	None	NA
LINC01704	NA	NA	NA	None	None	NA
OR10K1	NA	NA	NA	None	None	NA
PYHIN1	NA	NA	NA	None	None	NA
IFI16	-1.14702	0.241035	0.489998	None	None	0.61792
CFAP45	-4.81261	1.51357e-05	0.000556497	None	None	4.82
AL590560.5	-3.40999	0.397246	NA	None	None	0.400941
TAGLN2	0.141328	0.721288	0.87054	None	None	0.141891
IGSF9	NA	NA	NA	None	None	NA
LINC01133	-0.434706	0.915059	NA	None	None	0.0385511
PIGM	-0.556361	0.619674	0.810972	None	None	0.207837
AL121987.1	-2.39396	0.557413	NA	None	None	0.253823
KCNJ9	NA	NA	NA	None	None	NA
IGSF8	1.0509	0.0282934	0.137256	None	None	1.54831
ATP1A2	NA	NA	NA	None	None	NA
ATP1A4	0.217146	0.938017	0.973831	None	None	0.0277892
AL121987.2	-5.73142	0.00271759	0.0288954	None	None	2.56582
PEA15	0.118039	0.67358	0.843878	None	None	0.171611
DCAF8	0.0120026	0.954061	0.98138	None	None	0.0204236
AL139011.1	-5.57662	0.0751755	0.249974	None	None	1.12392
PEX19	0.459508	0.217508	0.461437	None	None	0.662526
COPA	0.165151	0.284533	0.537699	None	None	0.545868
NCSTN	0.16742	0.455002	0.696877	None	None	0.341986
NHLH1	-2.39396	0.557413	NA	None	None	0.253823
SLAMF6	NA	NA	NA	None	None	NA
CD84	NA	NA	NA	None	None	NA
AL121985.1	NA	NA	NA	None	None	NA
SLAMF7	NA	NA	NA	None	None	NA
LY9	NA	NA	NA	None	None	NA
AL354714.1	NA	NA	NA	None	None	NA
F11R	0.0937499	0.829345	0.925721	None	None	0.0812648
TSTD1	-0.456123	0.244343	0.494104	None	None	0.611999
USF1	0.0929906	0.798964	0.910107	None	None	0.0974727
ARHGAP30	-0.187669	0.711631	0.865608	None	None	0.147745
NECTIN4	-0.913393	2.66718e-05	0.000861013	None	None	4.57395
AL591806.1	-5.42183	0.168492	0.398794	None	None	0.773421
KLHDC9	-2.39396	0.557413	NA	None	None	0.253823
PFDN2	0.975528	3.34268e-05	0.00103293	None	None	4.47591
NIT1	-0.334204	0.176399	0.409715	None	None	0.753504
DEDD	0.161371	0.542031	0.76175	None	None	0.265976
UFC1	0.156411	0.515912	0.743585	None	None	0.287424
AL590714.1	0.0989785	0.933972	0.972536	None	None	0.0296661
USP21	-0.163977	0.639123	0.823422	None	None	0.194415
PPOX	-0.558989	0.0503585	0.195644	None	None	1.29793
B4GALT3	0.932473	0.000151745	0.00341625	None	None	3.81888
NDUFS2	0.136564	0.553016	0.768846	None	None	0.257263
FCER1G	NA	NA	NA	None	None	NA
APOA2	0.609849	0.87959	NA	None	None	0.0557198
TOMM40L	0.208743	0.893437	0.953202	None	None	0.0489363
NR1I3	-2.07322	0.142489	0.366673	None	None	0.84622
PCP4L1	0.639917	0.177042	0.410701	None	None	0.751924
MPZ	-4.41119	0.0108902	0.0738111	None	None	1.96297
SDHC	0.194191	0.306714	0.560216	None	None	0.513267
CFAP126	NA	NA	NA	None	None	NA
AL592295.4	-1.78182	0.235733	0.483299	None	None	0.62758
AL592295.5	-6.28963	0.00375595	0.0359851	None	None	2.42528
AL592295.3	-0.458281	0.780835	0.899878	None	None	0.107441
FCGR2A	-2.39396	0.557413	NA	None	None	0.253823
HSPA6	2.09922	0.595084	NA	None	None	0.225422
FCGR2B	-2.39396	0.557413	NA	None	None	0.253823
FCRLB	-5.99567	0.041047	0.173382	None	None	1.38672
DUSP12	0.304364	0.192207	0.429647	None	None	0.716231
AL359541.1	NA	NA	NA	None	None	NA
ATF6	0.293291	0.313177	0.567403	None	None	0.50421
NOS1AP	0.910537	0.0575516	0.212578	None	None	1.23994
AL450163.1	-0.990497	0.544414	0.762498	None	None	0.264071
C1orf226	-0.893615	0.825772	NA	None	None	0.0831401
SH2D1B	NA	NA	NA	None	None	NA
UHMK1	0.0986709	0.708522	0.863223	None	None	0.149647
AL596325.1	NA	NA	NA	None	None	NA
UAP1	0.648422	0.000381298	0.00672029	None	None	3.41874
AL596325.2	NA	NA	NA	None	None	NA
DDR2	1.38946	0.000695509	0.010656	None	None	3.1577
HSD17B7	-0.238357	0.340437	0.595192	None	None	0.467963
CCDC190	-3.39914	0.398854	NA	None	None	0.399186
RGS5	-0.0904733	0.846275	0.933091	None	None	0.0724883
AL499616.1	-1.15765	0.0926024	0.282902	None	None	1.03338
AL592435.1	-1.91943	0.296035	0.549921	None	None	0.528657
AL592435.2	NA	NA	NA	None	None	NA
NUF2	-0.811357	0.00910135	0.0653655	None	None	2.04089
PBX1	-0.547927	0.19212	0.429641	None	None	0.716428
AL391001.1	-0.489849	0.90438	NA	None	None	0.0436488
AL357568.1	-4.23948	0.0276033	0.134844	None	None	1.55904
AL357568.2	-1.17334	0.451311	0.694504	None	None	0.345525
LRRC52-AS1	-2.39396	0.557413	NA	None	None	0.253823
AL356441.1	-4.64968	0.00112863	0.015157	None	None	2.94745
MGST3	-0.498125	0.00693353	0.0549882	None	None	2.15905
ALDH9A1	-0.266185	0.341684	0.596327	None	None	0.466375
TMCO1	-0.0546614	0.877503	0.947066	None	None	0.0567514
TMCO1-AS1	-0.685962	0.606967	0.801891	None	None	0.216835
UCK2	1.03105	0.000436043	0.00744746	None	None	3.36047
AL358115.1	0.52705	0.314716	0.568943	None	None	0.502081
FAM78B	NA	NA	NA	None	None	NA
AL596087.2	NA	NA	NA	None	None	NA
AL583804.1	NA	NA	NA	None	None	NA
POGK	-0.476531	0.0669842	0.232122	None	None	1.17403
TADA1	-0.169103	0.6874	0.851206	None	None	0.16279
ILDR2	-0.00221264	0.998008	0.998831	None	None	0.000866114
MAEL	-0.489849	0.90438	NA	None	None	0.0436488
GPA33	0.285886	0.331631	0.586917	None	None	0.479345
DUSP27	-0.0794828	0.936162	0.973167	None	None	0.0286491
LINC01363	-2.39396	0.557413	NA	None	None	0.253823
AL451050.2	0.26707	0.512833	0.741276	None	None	0.290024
POU2F1	0.380052	0.153815	0.38089	None	None	0.813002
AL136984.1	NA	NA	NA	None	None	NA
CD247	-0.20621	0.85171	0.935772	None	None	0.0697085
AL359962.3	NA	NA	NA	None	None	NA
CREG1	0.277308	0.365311	0.619559	None	None	0.437337
RCSD1	-1.59605	0.345681	0.600413	None	None	0.461324
MPZL1	0.485709	0.175295	0.408008	None	None	0.756231
ADCY10	0.630267	0.215183	0.458652	None	None	0.667193
Z99943.1	NA	NA	NA	None	None	NA
MPC2	0.0393275	0.879424	0.947767	None	None	0.0558018
DCAF6	0.297027	0.314382	0.568679	None	None	0.502542
GPR161	-2.50648	0.244411	0.494187	None	None	0.61188
TIPRL	-0.217746	0.459886	0.701098	None	None	0.33735
SFT2D2	0.396614	0.0913639	0.280711	None	None	1.03923
TBX19	1.0394	0.121349	0.333857	None	None	0.915965
AL023755.1	-0.370085	0.528721	0.752775	None	None	0.276773
XCL2	NA	NA	NA	None	None	NA
DPT	NA	NA	NA	None	None	NA
LINC00970	-5.21106	0.00842295	0.0620833	None	None	2.07454
AL031726.1	-0.434706	0.915059	NA	None	None	0.0385511
NME7	0.527853	0.429338	0.676427	None	None	0.367201
Z99758.1	0.166606	0.934449	0.972583	None	None	0.0294445
BLZF1	-0.424261	0.132916	0.351748	None	None	0.876424
CCDC181	0.714179	0.0724094	0.244725	None	None	1.14021
SLC19A2	0.957376	2.6079e-06	0.000146242	None	None	5.58371
Z99572.1	0.118087	0.673227	0.843633	None	None	0.171839
F5	-0.603821	0.559147	0.771478	None	None	0.252474
SELP	-2.44591	0.543608	NA	None	None	0.264714
C1orf112	-0.0485919	0.869711	0.943466	None	None	0.0606248
SELE	NA	NA	NA	None	None	NA
METTL18	-0.315087	0.564377	0.774573	None	None	0.24843
SCYL3	0.283851	0.142898	0.367374	None	None	0.844974
KIFAP3	-0.184151	0.681765	0.848616	None	None	0.166365
METTL11B	NA	NA	NA	None	None	NA
LINC01681	NA	NA	NA	None	None	NA
GORAB-AS1	NA	NA	NA	None	None	NA
GORAB	-0.282781	0.283847	0.536997	None	None	0.546916
AL023495.1	-0.489849	0.90438	NA	None	None	0.0436488
PRRX1	NA	NA	NA	None	None	NA
BX284613.2	1.04952	0.0294337	0.140284	None	None	1.53115
MROH9	-1.10487	0.171356	0.402139	None	None	0.7661
FMO3	-4.60603	0.21734	NA	None	None	0.662859
FMO2	NA	NA	NA	None	None	NA
FMO1	-2.10675	0.0745703	0.249072	None	None	1.12743
FMO4	-0.724071	0.157342	0.384564	None	None	0.803155
PRRC2C	0.779607	4.01091e-10	1.12473e-07	None	None	9.39676
MYOCOS	0.608292	0.393169	0.645591	None	None	0.405421
MYOC	1.43475	0.533704	0.755763	None	None	0.2727
VAMP4	-0.45385	0.127543	0.343156	None	None	0.894343
EEF1AKNMT	0.185943	0.419715	0.667652	None	None	0.377046
DNM3	0.150244	0.733249	0.877191	None	None	0.134748
DNM3OS	NA	NA	NA	None	None	NA
PIGC	-0.478091	0.143443	0.367777	None	None	0.843321
C1orf105	-4.60505	0.000371706	0.00659453	None	None	3.4298
SUCO	0.0516851	0.858689	0.93917	None	None	0.0661639
AL031599.1	-0.909619	0.0216291	0.115086	None	None	1.66496
TNFSF18	NA	NA	NA	None	None	NA
TNFSF4	-0.216344	0.94781	NA	None	None	0.0232787
AL645568.1	0.0810888	0.776569	0.897968	None	None	0.10982
PRDX6	0.802591	9.94051e-05	0.00243497	None	None	4.00259
[truncated: 27,066 more rows]
