# Supplementary material for: Comparative analysis of the syncytiotrophoblast in placenta tissue and trophoblast organoids using snRNA sequencing
Source: bioRxiv preprint, doi:10.1101/2024.07.01.601571, version 2 (2025-02-19)
Supplement: SupplementalTable_Figure5E [file 601571_file06.xlsx]

## Sheet: res_RYBP_v_WT_DESeq2
baseMean	log2FoldChange	lfcSE	stat	pvalue	padj
DDX11L1	1.47075	-3.82226	3.41709	-1.11857	0.263324	NA
WASH7P	0	NA	NA	NA	NA	NA
MIR6859-1	0	NA	NA	NA	NA	NA
MIR1302-2HG	0	NA	NA	NA	NA	NA
MIR1302-2	0	NA	NA	NA	NA	NA
FAM138A	0	NA	NA	NA	NA	NA
OR4G4P	0	NA	NA	NA	NA	NA
OR4G11P	0	NA	NA	NA	NA	NA
OR4F5	0	NA	NA	NA	NA	NA
ENSG00000238009	1.52303	3.69277	2.15116	1.71664	0.0860446	NA
ENSG00000239945	0	NA	NA	NA	NA	NA
CICP27	0	NA	NA	NA	NA	NA
ENSG00000268903	0	NA	NA	NA	NA	NA
ENSG00000269981	0	NA	NA	NA	NA	NA
ENSG00000239906	0	NA	NA	NA	NA	NA
ENSG00000241860	66.1651	0.184327	0.278279	0.662382	0.507726	0.713474
RNU6-1100P	0	NA	NA	NA	NA	NA
ENSG00000241599	0	NA	NA	NA	NA	NA
DDX11L17	0	NA	NA	NA	NA	NA
WASH9P	0	NA	NA	NA	NA	NA
MIR6859-2	0	NA	NA	NA	NA	NA
ENSG00000228463	124.207	-0.0972039	0.198017	-0.490887	0.623506	0.794001
ENSG00000286448	4.25045	-3.95571	1.46274	-2.70432	0.00684445	0.0341289
RPL23AP24	0	NA	NA	NA	NA	NA
ENSG00000236601	0.459686	2.94303	3.9704	0.741243	0.458546	NA
ENSG00000237094	68.0082	-0.037151	0.242882	-0.152959	0.878431	0.941479
WBP1LP7	0	NA	NA	NA	NA	NA
OR4F29	1.62955	0.550396	1.99694	0.27562	0.78284	NA
CICP7	0	NA	NA	NA	NA	NA
ENSG00000250575	0	NA	NA	NA	NA	NA
U6_1	0	NA	NA	NA	NA	NA
ENSG00000230021	6.25361	-0.486674	0.94311	-0.516032	0.605832	0.783248
ENSG00000235146	0.255933	0	4.08052	0	1	NA
MTND1P23	0	NA	NA	NA	NA	NA
MTND2P28	0	NA	NA	NA	NA	NA
MTCO1P12	0	NA	NA	NA	NA	NA
ENSG00000278791	0	NA	NA	NA	NA	NA
MTCO2P12	0	NA	NA	NA	NA	NA
MTATP8P1	0	NA	NA	NA	NA	NA
MTATP6P1	0	NA	NA	NA	NA	NA
MTCO3P12	0	NA	NA	NA	NA	NA
WBP1LP6	0	NA	NA	NA	NA	NA
OR4F16	1.71497	0.185545	1.77769	0.104374	0.916872	NA
CICP3	0	NA	NA	NA	NA	NA
ENSG00000228327	190.578	-0.213275	0.211966	-1.00618	0.31433	0.537047
RNU6-1199P	0	NA	NA	NA	NA	NA
ENSG00000229905	0	NA	NA	NA	NA	NA
LINC01409	20.8902	-0.395545	0.439489	-0.900011	0.368114	0.592133
ENSG00000285268	0	NA	NA	NA	NA	NA
ENSG00000230092	11.0608	-0.530144	0.573325	-0.924683	0.355131	0.579656
FAM87B	10.6921	-0.405446	0.621836	-0.652014	0.514392	0.717685
LINC01128	282.956	-0.0560256	0.165471	-0.338582	0.734925	0.862678
LINC00115	11.5911	0.125122	0.615679	0.203227	0.838958	0.921751
ENSG00000288531	0.870646	-1.51924	2.17893	-0.697242	0.485651	NA
FAM41C	5.42918	2.18526	0.951795	2.29594	0.0216795	0.0804079
TUBB8P11	0	NA	NA	NA	NA	NA
ENSG00000283040	0	NA	NA	NA	NA	NA
ENSG00000272438	0	NA	NA	NA	NA	NA
ENSG00000230699	0.219918	1.8835	4.0382	0.466421	0.640914	NA
ENSG00000241180	0	NA	NA	NA	NA	NA
LINC02593	13.0746	2.26445	0.618325	3.66223	0.00025003	0.00247033
SAMD11	11.6473	-0.308199	0.830542	-0.371081	0.710577	0.847639
NOC2L	2481.2	-0.205977	0.142736	-1.44307	0.149002	0.32807
KLHL17	58.8914	0.530203	0.270142	1.96268	0.0496833	0.148753
PLEKHN1	86.9952	1.50087	0.347449	4.3197	1.56243e-05	0.000257091
PERM1	4.34829	2.03235	0.998868	2.03465	0.0418857	0.131132
ENSG00000272512	0.30769	-0.795025	4.04448	-0.19657	0.844164	NA
HES4	15.5937	0.900393	0.586747	1.53455	0.124894	0.289627
ISG15	121.516	1.27782	0.2582	4.94896	7.46105e-07	1.90675e-05
ENSG00000231702	0	NA	NA	NA	NA	NA
ENSG00000224969	0	NA	NA	NA	NA	NA
AGRN	1560.45	0.826059	0.193323	4.27295	1.92903e-05	0.00030761
ENSG00000242590	0	NA	NA	NA	NA	NA
ENSG00000217801	34.8704	1.67799	0.635133	2.64195	0.00824308	0.039239
ENSG00000273443	1.64997	-0.391578	1.41426	-0.276878	0.781874	NA
RNF223	19.7479	1.70385	0.552663	3.08299	0.00204933	0.0133606
C1orf159	124.782	0.0573999	0.236868	0.242328	0.808526	0.905124
ENSG00000285812	2.00107	0.686976	1.29034	0.532399	0.594449	NA
LINC01342	0	NA	NA	NA	NA	NA
MIR200B	0	NA	NA	NA	NA	NA
MIR200A	0	NA	NA	NA	NA	NA
MIR429	0	NA	NA	NA	NA	NA
ENSG00000272141	0.232385	1.95337	4.03209	0.484455	0.628063	NA
TTLL10-AS1	0.211241	0.0291586	4.08052	0.00714579	0.994299	NA
TTLL10	0.101982	-0.93263	4.08052	-0.228556	0.819214	NA
TNFRSF18	0	NA	NA	NA	NA	NA
TNFRSF4	0	NA	NA	NA	NA	NA
SDF4	2492.71	0.297946	0.104952	2.83888	0.00452723	0.0247705
B3GALT6	213.632	0.309587	0.187449	1.65158	0.0986195	0.245215
C1QTNF12	2.19992	-1.56934	1.34943	-1.16296	0.244846	NA
ENSG00000260179	1.91523	0.32681	1.49576	0.218491	0.827046	NA
UBE2J2	1175.85	-0.0509915	0.106419	-0.479156	0.631828	0.800108
LINC01786	0.334817	0.963639	4.0345	0.23885	0.811222	NA
SCNN1D	13.5637	0.176387	0.672708	0.262204	0.793164	0.896343
ACAP3	496.578	0.583628	0.207741	2.80941	0.00496328	0.0265186
MIR6726	0	NA	NA	NA	NA	NA
PUSL1	279.647	-0.229713	0.159044	-1.44434	0.148645	0.327374
INTS11	1222.36	0.0126464	0.0970557	0.1303	0.896329	0.950178
MIR6727	0	NA	NA	NA	NA	NA
ENSG00000240731	14.0001	-0.500007	0.533247	-0.937665	0.348417	0.573313
CPTP	380.229	0.225848	0.115532	1.95486	0.0505997	0.150649
TAS1R3	20.5956	-0.493245	0.611433	-0.806703	0.419838	0.639659
DVL1	1632.12	-0.0928983	0.114152	-0.81381	0.415754	0.636501
MIR6808	0	NA	NA	NA	NA	NA
MXRA8	270.852	0.345863	0.331518	1.04327	0.296823	0.518076
AURKAIP1	1008.27	-0.292721	0.121535	-2.40853	0.0160169	0.0642029
NDUFB4P8	0	NA	NA	NA	NA	NA
CCNL2	1928.01	0.206738	0.101314	2.04057	0.0412937	0.129811
MRPL20-AS1	298.544	-0.204304	0.133718	-1.52788	0.126543	0.292217
MRPL20	1053.02	-0.254141	0.110599	-2.29786	0.02157	0.080149
RN7SL657P	0	NA	NA	NA	NA	NA
MRPL20-DT	44.6392	0.236185	0.346752	0.681135	0.495786	0.703679
ANKRD65	15.9123	2.66133	0.761508	3.49481	0.000474398	0.00415827
ANKRD65-AS1	0	NA	NA	NA	NA	NA
TMEM88B	2.77662	0.0724865	1.16565	0.0621853	0.950415	0.977473
LINC01770	2.04946	-0.0371125	1.62352	-0.0228592	0.981763	NA
VWA1	2582.8	0.304768	0.155724	1.9571	0.0503355	0.150092
ATAD3C	7.09477	2.09085	1.16101	1.80089	0.0717206	0.194429
ATAD3B	842.335	-0.55932	0.162797	-3.4357	0.000591032	0.00493661
ENSG00000284740	0.646577	-0.601228	2.4915	-0.241312	0.809314	NA
ATAD3A	578.85	-0.431581	0.168297	-2.56439	0.0103356	0.0464573
TMEM240	3.46338	-0.164413	1.4908	-0.110285	0.912184	0.957412
SSU72	2923.07	0.00925684	0.0906517	0.102114	0.918666	0.960231
ENSG00000215014	9.97898	0.257631	0.606081	0.425078	0.67078	0.824758
ENSG00000274481	0	NA	NA	NA	NA	NA
FNDC10	40.4177	0.827873	0.351219	2.35714	0.0184161	0.0712654
ENSG00000286989	4.32478	2.23627	1.14924	1.94587	0.0516704	0.152904
ENSG00000272106	48.9164	0.296876	0.341687	0.868852	0.384928	0.608683
MIB2	427.774	0.712869	0.2365	3.01424	0.00257624	0.0159658
MMP23B	9.19672	1.03338	0.698668	1.47907	0.139121	0.312431
CDK11B	1246.87	-0.202154	0.111313	-1.81608	0.0693579	0.189705
ENSG00000272004	0.98189	1.85209	2.70203	0.685445	0.493063	NA
SLC35E2B	1272.94	0.403706	0.0961551	4.19849	2.68702e-05	0.00040287
ENSG00000269737	5.71908	-0.589393	0.82347	-0.715744	0.47415	0.686985
MMP23A	0	NA	NA	NA	NA	NA
CDK11A	840.639	-0.0255368	0.129663	-0.196948	0.843868	0.924658
ENSG00000268575	62.3179	0.00066925	0.327444	0.00204386	0.998369	0.99928
ENSG00000227775	11.518	-0.644963	0.616716	-1.0458	0.295653	0.516701
SLC35E2A	23.3425	0.0954058	0.437995	0.217824	0.827566	0.915422
NADK	2165.58	0.0840882	0.0839427	1.00173	0.316472	0.539562
GNB1	5455.42	0.0934657	0.0776287	1.20401	0.228586	0.438211
GNB1-DT	0.865937	-0.925748	2.14521	-0.431542	0.666075	NA
CALML6	1.9563	-0.775798	1.45092	-0.534693	0.592862	NA
TMEM52	42.0775	-0.122617	0.290089	-0.422688	0.672523	0.825948
CFAP74	25.5426	0.0978653	0.440093	0.222374	0.824023	0.913707
ENSG00000233542	0	NA	NA	NA	NA	NA
GABRD	3.89234	1.66943	1.00399	1.66279	0.0963538	0.240768
PRKCZ-DT	0	NA	NA	NA	NA	NA
PRKCZ	6375.57	0.214417	0.214369	1.00022	0.317203	0.540377
ENSG00000271806	31.2507	0.467867	0.451289	1.03673	0.299859	0.521096
PRKCZ-AS1	49.0721	0.24888	0.28483	0.873786	0.382235	0.606059
FAAP20	239.999	0.241008	0.17093	1.40998	0.158546	0.34233
ENSG00000234396	0	NA	NA	NA	NA	NA
SKI	1232.73	0.559726	0.132792	4.21506	2.49714e-05	0.00037795
ENSG00000287356	6.87285	2.38149	0.927617	2.56732	0.0102488	0.0461765
MORN1	58.3975	-0.338769	0.278164	-1.21788	0.223271	0.431192
ENSG00000272161	0.114941	-0.93263	4.08052	-0.228556	0.819214	NA
ENSG00000269896	2.5193	0.645069	1.43657	0.449034	0.653407	NA
ENSG00000272420	0.626235	-0.595591	2.86447	-0.207924	0.835288	NA
RER1	3086.41	0.0466539	0.112172	0.415915	0.677473	0.828993
PEX10	281.187	-0.137758	0.147828	-0.931885	0.351396	0.576159
PLCH2	0.30769	-0.795025	4.04448	-0.19657	0.844164	NA
ENSG00000224387	0	NA	NA	NA	NA	NA
ENSG00000229393	0	NA	NA	NA	NA	NA
PANK4	330.846	0.210458	0.128839	1.6335	0.102364	0.252133
HES5	0	NA	NA	NA	NA	NA
ENSG00000272449	4.54995	0.550022	1.08625	0.506351	0.61261	0.787898
TNFRSF14-AS1	0.383899	0	4.08052	0	1	NA
TNFRSF14	7.0925	2.30286	0.905646	2.54278	0.0109974	0.0485191
ENSG00000225931	0	NA	NA	NA	NA	NA
ENSG00000228037	0	NA	NA	NA	NA	NA
ENSG00000289610	0	NA	NA	NA	NA	NA
PRXL2B	56.6931	1.93448	0.391326	4.94339	7.67739e-07	1.94786e-05
MMEL1	4.19467	-0.504282	1.07724	-0.468125	0.639695	0.804637
MMEL1-AS1	0.114941	-0.93263	4.08052	-0.228556	0.819214	NA
TTC34	2.10394	0.190353	1.24635	0.152728	0.878613	NA
ENSG00000285945	0	NA	NA	NA	NA	NA
ENSG00000283259	0	NA	NA	NA	NA	NA
ENSG00000233234	0	NA	NA	NA	NA	NA
ENSG00000287396	0	NA	NA	NA	NA	NA
ENSG00000231630	0	NA	NA	NA	NA	NA
ENSG00000284745	0	NA	NA	NA	NA	NA
ACTRT2	0	NA	NA	NA	NA	NA
PRDM16-DT	0	NA	NA	NA	NA	NA
PRDM16	2.56884	0.771873	1.3556	0.569396	0.569087	NA
MIR4251	0	NA	NA	NA	NA	NA
ENSG00000226286	0	NA	NA	NA	NA	NA
ENSG00000279839	0	NA	NA	NA	NA	NA
ENSG00000272235	0	NA	NA	NA	NA	NA
ENSG00000287828	0	NA	NA	NA	NA	NA
ENSG00000286518	0	NA	NA	NA	NA	NA
ARHGEF16	232.258	0.429265	0.153651	2.79378	0.00520963	0.0276331
ENSG00000272088	0.567734	0.921895	2.684	0.343477	0.731239	NA
MEGF6	13.5415	2.44926	0.622095	3.93712	8.24658e-05	0.00100896
MIR551A	0	NA	NA	NA	NA	NA
ENSG00000238260	0.651421	1.92815	2.45738	0.784638	0.432666	NA
TPRG1L	485.036	0.899076	0.198431	4.53092	5.87265e-06	0.00011195
WRAP73	343.729	-0.0318924	0.124516	-0.25613	0.79785	0.899053
TP73	50.6971	0.709409	0.336561	2.10782	0.0350467	0.115184
TP73-AS3	0.203541	0	4.08052	0	1	NA
TP73-AS2	0	NA	NA	NA	NA	NA
TP73-AS1	410.186	-0.0169829	0.134432	-0.126331	0.89947	0.951726
ENSG00000276189	0	NA	NA	NA	NA	NA
CCDC27	0	NA	NA	NA	NA	NA
SMIM1	5.53838	0.390344	0.893524	0.436859	0.662214	0.819228
LRRC47	1344.11	0.0638568	0.11402	0.560048	0.575446	0.761006
RN7SL574P	0.883713	-0.547496	2.17179	-0.252094	0.800968	NA
ENSG00000272153	11.2223	-0.0361137	0.577754	-0.062507	0.950159	0.977333
CEP104	765.934	0.0127653	0.104644	0.121987	0.902909	0.952953
DFFB	143.123	-0.123451	0.217227	-0.568304	0.569828	0.757685
C1orf174	855.325	-0.357497	0.143537	-2.49063	0.0127518	0.0541698
LINC01134	4.22176	0.894642	0.986114	0.90724	0.36428	0.588457
LINC01346	0	NA	NA	NA	NA	NA
LINC01345	0	NA	NA	NA	NA	NA
LINC02780	0.776567	-3.46707	3.08206	-1.12492	0.260624	NA
ENSG00000284703	0.46522	-0.932631	3.72334	-0.250482	0.802214	NA
EEF1DP6	0	NA	NA	NA	NA	NA
LINC01777	0	NA	NA	NA	NA	NA
ENSG00000284694	0	NA	NA	NA	NA	NA
ENSG00000227169	0	NA	NA	NA	NA	NA
LINC01646	0	NA	NA	NA	NA	NA
AJAP1	54.2816	3.40167	0.481458	7.06536	1.60195e-12	1.67413e-10
ENSG00000287586	0.222216	1.89707	4.03699	0.469922	0.638411	NA
ENSG00000284739	0	NA	NA	NA	NA	NA
LINC02781	0	NA	NA	NA	NA	NA
LINC02782	0	NA	NA	NA	NA	NA
ENSG00000284616	0	NA	NA	NA	NA	NA
ENSG00000284692	2.4962	5.38557	2.1048	2.5587	0.0105063	NA
ENSG00000284666	0	NA	NA	NA	NA	NA
ENSG00000260972	0	NA	NA	NA	NA	NA
ENSG00000283356	0	NA	NA	NA	NA	NA
ENSG00000236948	0	NA	NA	NA	NA	NA
ENSG00000264341	0	NA	NA	NA	NA	NA
MIR4689	0	NA	NA	NA	NA	NA
NPHP4	196.009	0.0215184	0.209544	0.102692	0.918208	0.960008
KCNAB2	26.8919	0.373524	0.512355	0.729033	0.465982	0.679505
CHD5	1.25578	0.0488352	1.85953	0.0262621	0.979048	NA
ENSG00000285629	2.35662	-0.344122	1.21228	-0.283865	0.776514	NA
RPL22	19961.5	0.0275365	0.0704502	0.390864	0.695898	0.839774
RNF207-AS1	0.85379	0.00889822	2.18576	0.00407099	0.996752	NA
RNF207	195.399	-0.225566	0.253917	-0.888347	0.374354	0.598592
ICMT	4626.05	-0.109003	0.0911594	-1.19574	0.231799	0.442117
ICMT-DT	26.4004	-0.446825	0.442774	-1.00915	0.312903	0.535723
HES3	0	NA	NA	NA	NA	NA
GPR153	59.3193	1.20795	0.32388	3.72961	0.000191779	0.00200302
ACOT7	804.251	-0.640404	0.184694	-3.46738	0.000525564	0.00448422
ENSG00000271746	2.60069	0.805156	1.24848	0.64491	0.518985	NA
HES2	7594.71	0.0024881	0.270746	0.00918978	0.992668	0.997155
ESPN	452.18	0.798635	0.34627	2.3064	0.0210885	0.0789111
MIR4252	0	NA	NA	NA	NA	NA
ENSG00000231868	0	NA	NA	NA	NA	NA
TNFRSF25	106.975	0.0843252	0.226656	0.37204	0.709863	0.847136
PLEKHG5	143.083	0.245706	0.232478	1.0569	0.290556	0.511244
NOL9	882.391	-0.28586	0.145704	-1.96192	0.0497712	0.148915
RNU6-731P	0	NA	NA	NA	NA	NA
ENSG00000229519	0	NA	NA	NA	NA	NA
TAS1R1	0.107516	-0.93263	4.08052	-0.228556	0.819214	NA
ZBTB48	119.362	0.341071	0.199292	1.71142	0.0870043	0.223684
KLHL21	588.997	-0.140734	0.129534	-1.08646	0.277275	0.497406
PHF13	869.975	-0.0422056	0.203879	-0.207012	0.836	0.919883
THAP3	125.446	-0.15567	0.221452	-0.702951	0.482086	0.693172
DNAJC11	2383.34	-0.307423	0.104335	-2.9465	0.00321395	0.0188909
LINC01672	0	NA	NA	NA	NA	NA
ENSG00000284744	0	NA	NA	NA	NA	NA
CAMTA1-DT	0.111108	0.990947	4.08052	0.242848	0.808123	NA
CAMTA1	302.33	-0.0533081	0.136489	-0.390566	0.696118	0.839925
ENSG00000227950	0	NA	NA	NA	NA	NA
ENSG00000237365	0	NA	NA	NA	NA	NA
RNU1-8P	0	NA	NA	NA	NA	NA
CAMTA1-IT1	0	NA	NA	NA	NA	NA
CAMTA1-AS2	0	NA	NA	NA	NA	NA
CAMTA1-AS1	0	NA	NA	NA	NA	NA
ENSG00000270171	0.333324	2.48245	3.99405	0.621538	0.534246	NA
ENSG00000270035	0	NA	NA	NA	NA	NA
ENSG00000269978	0	NA	NA	NA	NA	NA
VAMP3	2846.63	0.424081	0.082062	5.16782	2.36842e-07	6.90736e-06
ENSG00000269925	1.8994	1.65358	1.43631	1.15127	0.249622	NA
PER3	21.0313	0.817434	0.418617	1.9527	0.0508553	0.151103
ENSG00000236266	0.327367	-1.8229	4.03842	-0.45139	0.651709	NA
UTS2	0.334156	1.95337	4.03209	0.484455	0.628063	NA
TNFRSF9	4.30221	6.13872	1.79737	3.41538	0.000636924	0.00524753
ENSG00000270330	0	NA	NA	NA	NA	NA
PARK7	5639.9	-0.225923	0.0809715	-2.79016	0.00526825	0.0278598
Y_RNA_1	0	NA	NA	NA	NA	NA
ENSG00000284747	14.819	-1.10022	0.528676	-2.08109	0.0374255	0.121031
ENSG00000284716	1.00471	-1.79728	2.74077	-0.655757	0.51198	NA
ERRFI1	14749.3	-0.0272235	0.189472	-0.143681	0.885752	0.944727
ERRFI1-DT	3.59852	-0.891092	1.06004	-0.840622	0.40056	0.621752
ENSG00000232848	0	NA	NA	NA	NA	NA
ENSG00000229305	0	NA	NA	NA	NA	NA
ENSG00000288816	0.418997	-2.78741	3.97481	-0.701269	0.483135	NA
LINC01714	0.216923	-1.8333	4.03749	-0.454069	0.649779	NA
RNU1-7P	0	NA	NA	NA	NA	NA
ENSG00000233645	0	NA	NA	NA	NA	NA
RNU6-991P	0	NA	NA	NA	NA	NA
SLC45A1	22.284	0.44402	0.4468	0.99378	0.32033	0.543577
Y_RNA_2	0	NA	NA	NA	NA	NA
RERE	2261.39	-0.092255	0.123025	-0.749891	0.45332	0.668819
RERE-AS1	0	NA	NA	NA	NA	NA
ENSG00000221083	0	NA	NA	NA	NA	NA
ENSG00000270282	0	NA	NA	NA	NA	NA
RPL7P11	0	NA	NA	NA	NA	NA
RPL7P7	0	NA	NA	NA	NA	NA
Y_RNA_3	0	NA	NA	NA	NA	NA
ENSG00000226545	0	NA	NA	NA	NA	NA
ENSG00000228423	0.116193	0.990947	4.08052	0.242848	0.808123	NA
RPL23AP19	0	NA	NA	NA	NA	NA
ENO1	38705.6	-0.135768	0.125496	-1.08185	0.279318	0.499439
MIR6728	0	NA	NA	NA	NA	NA
ENO1-AS1	1.8861	0.257557	1.42799	0.180364	0.856867	NA
RNU6-304P	0	NA	NA	NA	NA	NA
HMGN2P17	0	NA	NA	NA	NA	NA
ENSG00000232208	0	NA	NA	NA	NA	NA
ENSG00000232663	0	NA	NA	NA	NA	NA
CA6	0.991716	1.62364	2.22589	0.729432	0.465737	NA
RN7SL451P	0	NA	NA	NA	NA	NA
SLC2A7	0	NA	NA	NA	NA	NA
SLC2A5	7.44499	0.592351	0.758901	0.780539	0.435074	0.653714
ENSG00000252404	0	NA	NA	NA	NA	NA
GPR157	2194.09	1.02596	0.223926	4.58168	4.61254e-06	9.09044e-05
MIR34AHG	212.628	-0.862903	0.202775	-4.25547	2.08611e-05	0.000327602
MIR34A	0	NA	NA	NA	NA	NA
LNCTAM34A	40.8613	-0.55465	0.355122	-1.56186	0.118321	0.279103
H6PD	868.098	0.320774	0.105051	3.05352	0.00226175	0.0144293
SPSB1	47.0815	0.777778	0.310946	2.50133	0.0123727	0.0529695
ENSG00000284652	0.107516	-0.93263	4.08052	-0.228556	0.819214	NA
LINC02606	0.321688	1.8835	4.0382	0.466421	0.640914	NA
RNA5SP40	0	NA	NA	NA	NA	NA
ENSG00000235263	0	NA	NA	NA	NA	NA
SLC25A33	568.706	-0.293629	0.152911	-1.92025	0.0548261	0.159659
ENSG00000231181	0	NA	NA	NA	NA	NA
TMEM201	331.707	-0.534681	0.18983	-2.81663	0.00485297	0.0260562
PIK3CD	182.421	0.032943	0.292532	0.112613	0.910337	0.956595
PIK3CD-AS1	0	NA	NA	NA	NA	NA
ENSG00000233268	0	NA	NA	NA	NA	NA
PIK3CD-AS2	17.5453	1.1413	0.464528	2.4569	0.0140141	0.0582632
CLSTN1	3019.67	0.268315	0.115236	2.32839	0.0198912	0.0754765
MZT1P1	0	NA	NA	NA	NA	NA
ENSG00000280113	0	NA	NA	NA	NA	NA
CTNNBIP1	357.454	0.10597	0.181164	0.58494	0.558588	0.750581
ENSG00000223989	0	NA	NA	NA	NA	NA
ENSG00000285701	0.101982	-0.93263	4.08052	-0.228556	0.819214	NA
LZIC	1544.97	-0.0979979	0.0737608	-1.32859	0.183983	0.378242
ENSG00000228150	0.444673	0.00319683	3.71558	0.000860383	0.999314	NA
NMNAT1	476.819	-0.247417	0.119866	-2.06412	0.0390063	0.124583
RN7SKP269	0.224668	0	4.08052	0	1	NA
TMEM274P	0	NA	NA	NA	NA	NA
MIR5697	0	NA	NA	NA	NA	NA
ENSG00000241326	0.240301	0	4.08052	0	1	NA
RBP7	24.678	1.2004	0.407316	2.94709	0.00320785	0.0188614
UBE4B	3117.1	0.0811506	0.130566	0.621527	0.534253	0.73349
ENSG00000224340	0	NA	NA	NA	NA	NA
PGAM1P11	0	NA	NA	NA	NA	NA
RNU6-828P	0	NA	NA	NA	NA	NA
KIF1B	1931.97	0.341632	0.116933	2.92161	0.00348226	0.0201178
ENSG00000264881	0	NA	NA	NA	NA	NA
RNU6-37P	0	NA	NA	NA	NA	NA
RN7SL731P	0	NA	NA	NA	NA	NA
ENSG00000284735	1.53652	0.0449405	1.68609	0.0266537	0.978736	NA
ENSG00000284642	2.10041	-0.250787	1.27856	-0.196148	0.844495	NA
PGD	4663.16	-0.105264	0.129865	-0.810564	0.417616	0.637961
ENSG00000271989	0.572537	1.85853	3.00853	0.617754	0.536738	NA
CENPS-CORT	9.41955	0.068999	1.01609	0.0679066	0.94586	0.974901
CENPS	208.311	-0.346005	0.173645	-1.9926	0.0463052	0.141308
CORT	2.30874	-1.61536	1.47811	-1.09285	0.274458	NA
DFFA	3138.16	-0.213764	0.0888405	-2.40615	0.0161214	0.0645777
ENSG00000203469	0.239074	0.990947	4.08052	0.242848	0.808123	NA
PEX14	374.889	0.219794	0.127898	1.71851	0.0857033	0.221409
ENSG00000287727	1.56532	1.01758	1.91383	0.531698	0.594935	NA
RN7SL614P	0	NA	NA	NA	NA	NA
CASZ1	73.9029	2.51537	0.308292	8.15906	3.37655e-16	7.50406e-14
ENSG00000272078	11.4176	1.75055	0.615322	2.84493	0.00444213	0.0244025
HSPE1P24	0	NA	NA	NA	NA	NA
C1orf127	0	NA	NA	NA	NA	NA
CFL1P6	0	NA	NA	NA	NA	NA
TARDBP	6327.79	-0.164368	0.0962145	-1.70835	0.0875721	0.224584
MASP2	28.2536	0.338714	0.470568	0.719798	0.47165	0.68436
SRM	1798.22	-0.729373	0.16646	-4.38167	1.17772e-05	0.00020208
EXOSC10	2405.47	-0.109721	0.090058	-1.21834	0.223096	0.430997
ENSG00000226849	1.63469	-1.1937	2.21451	-0.539033	0.589864	NA
EXOSC10-AS1	5.27245	0.381281	0.938613	0.406217	0.684583	0.832943
MTOR	2299.75	-0.119537	0.136194	-0.877701	0.380106	0.604279
MTOR-AS1	0	NA	NA	NA	NA	NA
RNU6-537P	0	NA	NA	NA	NA	NA
ANGPTL7	0.103725	0.990947	4.08052	0.242848	0.808123	NA
RNU6-291P	0	NA	NA	NA	NA	NA
RPL39P6	0	NA	NA	NA	NA	NA
UBIAD1	713.306	-0.0692345	0.138421	-0.500175	0.616952	0.789918
UBE2V2P3	0	NA	NA	NA	NA	NA
ENSG00000284646	0	NA	NA	NA	NA	NA
MTCYBP45	0	NA	NA	NA	NA	NA
DISP3	1.8374	1.75014	1.65205	1.05938	0.289428	NA
ENSG00000285833	0.209499	-1.79014	4.04139	-0.442951	0.657801	NA
LINC01647	3.72479	-0.871133	1.21489	-0.717049	0.473344	0.686081
ENSG00000284708	0	NA	NA	NA	NA	NA
FBXO2	16.6392	2.05466	0.500842	4.10241	4.08874e-05	0.000567928
FBXO44	94.8719	1.17658	0.278336	4.22719	2.36632e-05	0.000362868
FBXO6	46.7465	0.764921	0.337766	2.26465	0.0235341	0.0853695
MAD2L2	189.918	-0.129263	0.194383	-0.664994	0.506054	0.712094
DRAXIN	3.40423	0.838514	1.07136	0.782665	0.433824	0.652501
AGTRAP	188.574	-0.0361963	0.177432	-0.204001	0.838352	0.921246
C1orf167	0.20745	1.81104	4.04485	0.447739	0.654342	NA
C1orf167-AS1	0	NA	NA	NA	NA	NA
MTHFR	494.054	0.0915621	0.129961	0.704536	0.481099	0.692698
CLCN6	406.829	0.00480499	0.11808	0.0406926	0.967541	0.985732
ENSG00000276470	0	NA	NA	NA	NA	NA
ENSG00000278852	0	NA	NA	NA	NA	NA
NPPA	0	NA	NA	NA	NA	NA
ENSG00000275915	0	NA	NA	NA	NA	NA
NPPB	2.42391	4.17465	1.71478	2.43451	0.014912	NA
SBF1P2	0	NA	NA	NA	NA	NA
ENSG00000285646	3.90256	-0.510321	1.02816	-0.496343	0.619652	0.792081
RNU5E-1	0.342216	-1.9069	4.03109	-0.473048	0.636179	NA
RNU5E-4P	0	NA	NA	NA	NA	NA
KIAA2013	1079.26	0.0701994	0.0902712	0.77765	0.436775	0.655088
PLOD1	3755.06	0.134922	0.131498	1.02604	0.304875	0.526269
ENSG00000287384	0.127966	0	4.08052	0	1	NA
MFN2	3357.02	-0.0891018	0.0928278	-0.959862	0.337125	0.561778
ENSG00000270914	0	NA	NA	NA	NA	NA
MIIP	254.382	-0.150089	0.155974	-0.962268	0.335915	0.560401
Y_RNA_4	0	NA	NA	NA	NA	NA
MIR6729	0	NA	NA	NA	NA	NA
RN7SL649P	0	NA	NA	NA	NA	NA
TNFRSF8	7.28537	-0.953495	0.797577	-1.19549	0.231896	0.442198
RNU6-777P	0	NA	NA	NA	NA	NA
RPL23AP89	0	NA	NA	NA	NA	NA
ENSG00000285604	0	NA	NA	NA	NA	NA
MIR7846	0	NA	NA	NA	NA	NA
TNFRSF1B	10141.3	0.586913	0.28954	2.02706	0.0426568	0.132953
MIR4632	0	NA	NA	NA	NA	NA
RPL10P17	0	NA	NA	NA	NA	NA
SNORA70_1	0	NA	NA	NA	NA	NA
VPS13D	1913.79	0.319744	0.154214	2.07337	0.0381375	0.122774
SNORA59A	0	NA	NA	NA	NA	NA
LINC02766	0.103725	0.990947	4.08052	0.242848	0.808123	NA
DHRS3	101.021	0.242563	0.236896	1.02393	0.30587	0.527004
RNU6ATAC18P	0	NA	NA	NA	NA	NA
MIR6730	0	NA	NA	NA	NA	NA
ENSG00000288927	1.65867	0.300899	1.53676	0.195801	0.844766	NA
ENSG00000272482	1.14497	0.510117	2.02693	0.251669	0.801297	NA
AADACL4	0	NA	NA	NA	NA	NA
ENSG00000226166	0	NA	NA	NA	NA	NA
AADACL3	5.21877	1.55048	1.26136	1.22921	0.218995	0.425696
CFAP107	0.222216	1.89707	4.03699	0.469922	0.638411	NA
PRAMEF12	0	NA	NA	NA	NA	NA
PRAMEF1	0	NA	NA	NA	NA	NA
LINC01784	0	NA	NA	NA	NA	NA
PRAMEF11	0.101982	-0.93263	4.08052	-0.228556	0.819214	NA
PRAMEF30P	0	NA	NA	NA	NA	NA
HNRNPCL1	0.735643	-1.0128	2.37258	-0.426879	0.669467	NA
PRAMEF2	0	NA	NA	NA	NA	NA
PRAMEF4	0	NA	NA	NA	NA	NA
PRAMEF10	0	NA	NA	NA	NA	NA
PRAMEF7	0	NA	NA	NA	NA	NA
RNU6-1072P	0	NA	NA	NA	NA	NA
PRAMEF29P	0	NA	NA	NA	NA	NA
PRAMEF6	0	NA	NA	NA	NA	NA
PRAMEF28P	0	NA	NA	NA	NA	NA
PRAMEF27	0	NA	NA	NA	NA	NA
HNRNPCL3	0	NA	NA	NA	NA	NA
PRAMEF25	12.9139	-3.0552	0.927288	-3.29477	0.000985025	0.00745435
PRAMEF34P	0	NA	NA	NA	NA	NA
PRAMEF35P	0	NA	NA	NA	NA	NA
HNRNPCL2	0	NA	NA	NA	NA	NA
PRAMEF36P	0	NA	NA	NA	NA	NA
ENSG00000233336	0	NA	NA	NA	NA	NA
PRAMEF26	0	NA	NA	NA	NA	NA
HNRNPCL4	0	NA	NA	NA	NA	NA
PRAMEF9	0	NA	NA	NA	NA	NA
PRAMEF13	0	NA	NA	NA	NA	NA
PRAMEF18	8.82757	-1.82138	0.965504	-1.88645	0.0592342	0.169184
PRAMEF31P	0	NA	NA	NA	NA	NA
PRAMEF5	0	NA	NA	NA	NA	NA
PRAMEF32P	0	NA	NA	NA	NA	NA
RNU6-771P	0	NA	NA	NA	NA	NA
PRAMEF8	0	NA	NA	NA	NA	NA
PRAMEF33	0	NA	NA	NA	NA	NA
PRAMEF15	0	NA	NA	NA	NA	NA
ENSG00000228229	0	NA	NA	NA	NA	NA
PRAMEF14	0	NA	NA	NA	NA	NA
PRAMEF19	3.09398	-1.75299	1.53511	-1.14193	0.253483	0.469445
PRAMEF17	0	NA	NA	NA	NA	NA
PRAMEF20	0	NA	NA	NA	NA	NA
LRRC38	0	NA	NA	NA	NA	NA
ENSG00000259961	0	NA	NA	NA	NA	NA
BRWD1P1	0	NA	NA	NA	NA	NA
PDPN	0	NA	NA	NA	NA	NA
RNA5SP41	0	NA	NA	NA	NA	NA
ENSG00000237445	0	NA	NA	NA	NA	NA
ENSG00000253085	0	NA	NA	NA	NA	NA
PRDM2	1322.37	0.00369203	0.0870913	0.0423926	0.966186	0.984808
ENSG00000289380	0.860021	0.00126026	2.25884	0.000557924	0.999555	NA
KAZN	1068.49	1.06413	0.213932	4.97417	6.55292e-07	1.7095e-05
RNU6-1265P	0	NA	NA	NA	NA	NA
ENSG00000231606	0	NA	NA	NA	NA	NA
KAZN-AS1	0	NA	NA	NA	NA	NA
TBCAP2	0	NA	NA	NA	NA	NA
ENSG00000287756	0	NA	NA	NA	NA	NA
TMEM51-AS1	52.8119	6.42068	0.955043	6.72292	1.78116e-11	1.52545e-09
TMEM51	91.8812	2.01985	0.344878	5.85671	4.72126e-09	2.21634e-07
TMEM51-AS2	0.101771	0	4.08052	0	1	NA
MFFP1	0	NA	NA	NA	NA	NA
ZBTB2P1	0	NA	NA	NA	NA	NA
FHAD1	1.35952	3.27132	2.03777	1.60535	0.108417	NA
FHAD1-AS1	0.127966	0	4.08052	0	1	NA
ENSG00000236045	0	NA	NA	NA	NA	NA
EFHD2-AS1	1.18308	3.86518	2.42631	1.59303	0.111153	NA
EFHD2	1458.3	0.596568	0.132884	4.48937	7.14336e-06	0.000133563
CTRC	0	NA	NA	NA	NA	NA
CELA2A	0.127966	0	4.08052	0	1	NA
CELA2B	0.383899	0	4.08052	0	1	NA
CASP9	332.427	0.797351	0.23725	3.36081	0.000777152	0.00620203
DNAJC16	886.831	0.116661	0.117396	0.993738	0.32035	0.543577
SCARNA21B	0	NA	NA	NA	NA	NA
ENSG00000272510	0	NA	NA	NA	NA	NA
AGMAT	9.03581	0.286307	0.610101	0.469279	0.63887	0.804061
ENSG00000237301	0	NA	NA	NA	NA	NA
CHCHD2P6	0	NA	NA	NA	NA	NA
RNU7-179P	0	NA	NA	NA	NA	NA
CD24P1	0	NA	NA	NA	NA	NA
DDI2	3776.65	0.286506	0.114057	2.51196	0.0120061	0.0518808
RSC1A1	122.773	-0.52918	0.247531	-2.13783	0.0325302	0.108995
ENSG00000271742	0	NA	NA	NA	NA	NA
PLEKHM2	1073.43	0.0908515	0.0994434	0.913601	0.360927	0.585128
ENSG00000237938	1.51574	1.07566	1.91169	0.562672	0.573658	NA
SLC25A34	1.21387	1.03228	1.71941	0.600365	0.548263	NA
SLC25A34-AS1	0	NA	NA	NA	NA	NA
TMEM82	0.555919	-0.896222	2.689	-0.333291	0.738914	NA
FBLIM1	175.395	1.14844	0.27435	4.18605	2.83851e-05	0.000419492
RPL12P14	0	NA	NA	NA	NA	NA
UQCRHL	1.22657	-1.2562	2.04139	-0.615364	0.538315	NA
ENSG00000178715	0	NA	NA	NA	NA	NA
FLJ37453	19.3115	0.178783	0.554973	0.322148	0.747341	0.870305
SPEN	2464.19	-0.0281011	0.0928965	-0.302499	0.762272	0.879201
ENSG00000270620	0	NA	NA	NA	NA	NA
ZBTB17	252.295	0.162894	0.159394	1.02196	0.306801	0.527926
ENSG00000234607	0	NA	NA	NA	NA	NA
ENSG00000231353	0	NA	NA	NA	NA	NA
ENSG00000275503	0	NA	NA	NA	NA	NA
TBC1D3P6	0	NA	NA	NA	NA	NA
SRARP	0	NA	NA	NA	NA	NA
ENSG00000233078	0	NA	NA	NA	NA	NA
HSPB7	43.1737	-0.244782	0.336432	-0.727584	0.466868	0.680402
CLCNKA	6.0561	0.219032	0.788434	0.277806	0.781161	0.889823
ENSG00000232456	0	NA	NA	NA	NA	NA
CLCNKB	2.52121	1.62445	1.44411	1.12488	0.260641	NA
FAM131C	0.798069	2.29092	2.66385	0.860003	0.389787	NA
EPHA2	1151.88	0.14432	0.207492	0.695544	0.486715	0.696474
EPHA2-AS1	3.35802	-0.123641	1.097	-0.112708	0.910262	0.956573
ENSG00000224621	0.337465	-1.7902	4.02025	-0.445295	0.656107	NA
ARHGEF19-AS1	0	NA	NA	NA	NA	NA
ARHGEF19	42.3431	-0.278646	0.360124	-0.773749	0.439079	0.656972
ANO7L1	1.10516	1.56942	2.56903	0.6109	0.541266	NA
ENSG00000288398	74.1298	-0.28401	0.273224	-1.03948	0.298583	0.519789
CPLANE2	42.1833	0.0125893	0.311918	0.0403607	0.967806	0.985753
MT1XP1	0	NA	NA	NA	NA	NA
FBXO42	747.387	0.330996	0.159146	2.07983	0.0375413	0.121316
SZRD1	5253.36	0.0127651	0.0848852	0.150381	0.880464	0.942224
RPL22P3	0	NA	NA	NA	NA	NA
SPATA21	0.51514	0.606482	3.96282	0.153043	0.878364	NA
NECAP2	970.802	0.307587	0.101867	3.01949	0.00253197	0.0157973
LINC01772	5.84778	1.30582	1.01	1.29289	0.196048	0.395289
CROCCP3	8.90537	0.79904	0.670456	1.19179	0.233345	0.443957
RNU1-1	5.52759	-1.37336	1.24983	-1.09884	0.271839	0.490625
ENSG00000261135	2.23894	0.879726	1.35877	0.647443	0.517345	NA
ENSG00000285853	0	NA	NA	NA	NA	NA
ENSG00000224174	0	NA	NA	NA	NA	NA
LINC01783	6.489	0.421513	0.831591	0.506875	0.612242	0.78754
RNU1-6P	0	NA	NA	NA	NA	NA
PDE4DIPP8	0	NA	NA	NA	NA	NA
NBPF1	863.413	0.275122	0.117629	2.33889	0.0193409	0.0738835
ENSG00000271732	0	NA	NA	NA	NA	NA
CROCCP2	295.644	0.0575863	0.135337	0.425503	0.67047	0.824583
ENSG00000283773	0	NA	NA	NA	NA	NA
MST1P2	0	NA	NA	NA	NA	NA
ENSG00000282143	1.90883	-0.203275	1.4315	-0.142001	0.887079	NA
RNU1-3	4.21851	-1.22625	1.13081	-1.08441	0.278185	0.498418
ENSG00000280114	0	NA	NA	NA	NA	NA
EIF1AXP1	0	NA	NA	NA	NA	NA
ESPNP	1.26824	-1.29437	2.08268	-0.621493	0.534276	NA
ENSG00000279151	0	NA	NA	NA	NA	NA
ENSG00000282740	0.33865	-0.903534	4.02384	-0.224545	0.822333	NA
CROCC	76.1944	0.00158692	0.233284	0.00680252	0.994572	0.997729
CROCCP4	0.432492	-0.796697	3.77497	-0.211048	0.83285	NA
RNU1-4	5.71534	-0.498116	1.1957	-0.41659	0.676979	0.828676
MST1L	53.0768	0.838646	0.303189	2.76608	0.00567348	0.0295245
ENSG00000223643	0	NA	NA	NA	NA	NA
PDE4DIPP9	0	NA	NA	NA	NA	NA
MIR3675	0	NA	NA	NA	NA	NA
ENSG00000228549	10.0411	0.491302	0.61288	0.80163	0.422767	0.64239
RNU1-5P	0	NA	NA	NA	NA	NA
ENSG00000238142	21.3548	0.49367	0.445562	1.10797	0.267874	0.486392
ENSG00000235241	0	NA	NA	NA	NA	NA
RNU1-2	6.70487	-0.0722414	0.973937	-0.0741746	0.940871	0.97187
ENSG00000272426	0.446008	0.0291587	3.23206	0.00902169	0.992802	NA
MFAP2	113.163	0.032478	0.359559	0.0903272	0.928027	0.96605
ENSG00000286898	0.112334	0	4.08052	0	1	NA
ENSG00000226526	0	NA	NA	NA	NA	NA
ATP13A2	1113.16	0.0839518	0.136958	0.612974	0.539893	0.737658
ENSG00000288636	0	NA	NA	NA	NA	NA
SDHB	1189.62	-0.410375	0.118301	-3.46892	0.000522559	0.00446886
PADI2	121.243	1.15684	0.408178	2.83416	0.00459459	0.0250519
LINC02783	0	NA	NA	NA	NA	NA
ENSG00000282843	0.255933	0	4.08052	0	1	NA
PADI1	94.2814	4.14584	1.39651	2.96872	0.00299046	0.0179193
PADI3	1.11542	3.42022	2.5571	1.33754	0.181047	NA
MIR3972	0	NA	NA	NA	NA	NA
PADI4	0.116193	0.990947	4.08052	0.242848	0.808123	NA
PADI6	0	NA	NA	NA	NA	NA
RCC2-AS1	0	NA	NA	NA	NA	NA
RCC2	4461.39	-0.451576	0.106937	-4.22284	2.41247e-05	0.000368364
ARHGEF10L	65.6617	1.16034	0.291759	3.97705	6.97742e-05	0.000877525
LINC02810	0	NA	NA	NA	NA	NA
ACTL8	0.429907	-0.0810841	3.74681	-0.0216409	0.982734	NA
ENSG00000284653	0	NA	NA	NA	NA	NA
LINC01654	0	NA	NA	NA	NA	NA
IGSF21	0	NA	NA	NA	NA	NA
ENSG00000280222	0	NA	NA	NA	NA	NA
IGSF21-AS1	0	NA	NA	NA	NA	NA
ENSG00000225387	0	NA	NA	NA	NA	NA
KLHDC7A	3.07029	4.62089	2.10062	2.19977	0.027823	0.0969031
DYNLL1P3	0	NA	NA	NA	NA	NA
ENSG00000225478	0	NA	NA	NA	NA	NA
PAX7	0	NA	NA	NA	NA	NA
TAS1R2	0	NA	NA	NA	NA	NA
ALDH4A1	1621.81	-0.0459721	0.1696	-0.271062	0.786344	0.892438
MIR4695	0	NA	NA	NA	NA	NA
MIR1290	0	NA	NA	NA	NA	NA
IFFO2	2571.6	0.270656	0.136435	1.98378	0.0472807	0.143518
ENSG00000272084	3.44466	-0.0742754	1.10445	-0.0672509	0.946382	0.975096
UBR4	2563.78	0.224775	0.130968	1.71627	0.0861133	0.222239
EMC1-AS1	3.56942	-1.10077	1.10743	-0.993986	0.32023	0.543577
EMC1	4060.93	0.00273538	0.0895121	0.0305588	0.975621	0.989943
MRTO4	1576.43	-0.515041	0.115875	-4.44481	8.79698e-06	0.000158734
ENSG00000286064	0	NA	NA	NA	NA	NA
AKR7L	10.7876	0.596814	0.630512	0.946555	0.343865	0.569091
AKR7A3	6.12023	-0.46114	0.846042	-0.545056	0.585715	0.768479
ENSG00000270728	0	NA	NA	NA	NA	NA
AKR7A2	1249.76	0.265444	0.111276	2.38545	0.0170582	0.0672259
RNU6-1099P	0	NA	NA	NA	NA	NA
SLC66A1	307.828	0.378269	0.178274	2.12184	0.0338511	0.112264
CAPZB	5402.76	0.117779	0.0882771	1.3342	0.182139	0.37586
RN7SL277P	0	NA	NA	NA	NA	NA
MICOS10	1301.95	-0.13908	0.133342	-1.04303	0.296934	0.518167
RNU4-28P	0	NA	NA	NA	NA	NA
MICOS10-DT	0	NA	NA	NA	NA	NA
NBL1	165.766	0.487071	0.345057	1.41157	0.158077	0.342046
MICOS10-NBL1	15.6374	0.2259	1.28569	0.175703	0.860527	0.934167
ENSG00000226396	0	NA	NA	NA	NA	NA
HTR6	0.209287	-0.93263	4.08052	-0.228556	0.819214	NA
TMCO4	180.56	-0.0467475	0.170443	-0.27427	0.783877	0.891298
RNF186	0.224668	0	4.08052	0	1	NA
RNF186-AS1	0	NA	NA	NA	NA	NA
OTUD3	601.967	-0.130448	0.181041	-0.720545	0.47119	0.68395
PLA2G2E	0	NA	NA	NA	NA	NA
RN7SL304P	0	NA	NA	NA	NA	NA
PLA2G2A	0	NA	NA	NA	NA	NA
PLA2G5	0	NA	NA	NA	NA	NA
PLA2G2D	1.08317	0.0291587	2.71635	0.0107345	0.991435	NA
PLA2G2F	9.77424	-1.48608	0.870216	-1.70772	0.0876887	0.224752
ENSG00000227066	5.92379	-2.12651	1.17181	-1.81472	0.0695663	0.190156
PLA2G2C	0	NA	NA	NA	NA	NA
UBXN10	0.43349	-0.932631	3.78449	-0.246435	0.805345	NA
LINC01757	0	NA	NA	NA	NA	NA
ENSG00000284710	0	NA	NA	NA	NA	NA
VWA5B1	0	NA	NA	NA	NA	NA
ENSG00000226664	0	NA	NA	NA	NA	NA
LINC01141	0	NA	NA	NA	NA	NA
ENSG00000226487	0	NA	NA	NA	NA	NA
ENSG00000284641	0	NA	NA	NA	NA	NA
ENSG00000284743	0	NA	NA	NA	NA	NA
CAMK2N1	25.4684	-0.367148	0.454517	-0.807776	0.419219	0.639059
ENSG00000289402	0	NA	NA	NA	NA	NA
MUL1	798.092	0.0393418	0.118834	0.331064	0.740596	0.866265
RPS4XP4	0	NA	NA	NA	NA	NA
FAM43B	0.111108	0.990947	4.08052	0.242848	0.808123	NA
CDA	15.3806	1.20298	0.842824	1.42732	0.153488	0.335141
PINK1	566.404	0.460816	0.127311	3.6196	0.000295056	0.00281079
MIR6084	0	NA	NA	NA	NA	NA
PINK1-AS	234.274	-0.0416172	0.154263	-0.269781	0.787328	0.89308
DDOST	10007.9	0.0957226	0.0799308	1.19757	0.231085	0.441379
KIF17	75.7826	0.290157	0.433553	0.669254	0.503333	0.709858
ENSG00000235432	0	NA	NA	NA	NA	NA
SH2D5	363.515	-0.676153	0.308267	-2.1934	0.0282785	0.0982561
ENSG00000233069	0	NA	NA	NA	NA	NA
HP1BP3	4671.41	0.0445611	0.118564	0.375839	0.707036	0.845267
EIF4G3	1871.62	-0.176551	0.10041	-1.7583	0.0786966	0.207865
RNU7-200P	0	NA	NA	NA	NA	NA
MIR1256	0	NA	NA	NA	NA	NA
RPS15AP6	0	NA	NA	NA	NA	NA
ENSG00000236073	0	NA	NA	NA	NA	NA
HSPE1P27	0	NA	NA	NA	NA	NA
ENSG00000287192	0.334368	0.991577	4.03209	0.245921	0.805743	NA
ECE1	2356.36	1.35381	0.285996	4.73366	2.2051e-06	4.83195e-05
ENSG00000236936	0	NA	NA	NA	NA	NA
ECE1-AS1	0.546568	0.921807	3.0635	0.3009	0.763491	NA
PPP1R11P1	0	NA	NA	NA	NA	NA
PDE4DIPP10	0	NA	NA	NA	NA	NA
ENSG00000236009	0	NA	NA	NA	NA	NA
NBPF2P	0	NA	NA	NA	NA	NA
HS6ST1P1	0	NA	NA	NA	NA	NA
CROCCP5	0	NA	NA	NA	NA	NA
NBPF3	463.54	0.28987	0.1207	2.40157	0.0163247	0.0651244
PFN1P10	0	NA	NA	NA	NA	NA
ALPL	1166.65	-0.570682	0.597303	-0.955432	0.339359	0.564217
ENSG00000289715	0	NA	NA	NA	NA	NA
LINC02596	0	NA	NA	NA	NA	NA
RAP1GAP	727.75	-0.611095	0.487657	-1.25312	0.210161	0.414165
USP48	2908.57	-0.171735	0.0827337	-2.07575	0.0379167	0.122192
ENSG00000231978	0	NA	NA	NA	NA	NA
LDLRAD2	4.33922	-0.19649	0.996178	-0.197244	0.843637	0.92452
HSPG2	888.694	1.80764	0.575683	3.13999	0.00168953	0.0114353
ENSG00000232037	0	NA	NA	NA	NA	NA
ENSG00000283234	0.111108	0.990947	4.08052	0.242848	0.808123	NA
CELA3B	0	NA	NA	NA	NA	NA
ENSG00000285959	0.203541	0	4.08052	0	1	NA
RN7SL386P	0	NA	NA	NA	NA	NA
RNU6-1022P	0	NA	NA	NA	NA	NA
CELA3A	0	NA	NA	NA	NA	NA
RN7SL186P	0	NA	NA	NA	NA	NA
RNU6-776P	0	NA	NA	NA	NA	NA
LINC01635	0.209499	-1.79014	4.04139	-0.442951	0.657801	NA
LINC00339	244.739	-0.386154	0.148725	-2.59642	0.00941999	0.0433745
ENSG00000289694	6010.43	0.174041	0.0891975	1.95119	0.0510342	0.151538
CDC42-AS1	15.3895	-0.674631	0.567015	-1.18979	0.234128	0.445012
ENSG00000285794	0	NA	NA	NA	NA	NA
CDC42	8059.87	0.272083	0.0921127	2.95381	0.0031388	0.0185361
CDC42-IT1	0.101771	0	4.08052	0	1	NA
MPHOSPH6P1	0	NA	NA	NA	NA	NA
WNT4	28.5668	1.18339	0.42603	2.77772	0.00547412	0.0286979
ENSG00000285873	0.316087	-0.93263	4.08052	-0.228556	0.819214	NA
MIR4418	0	NA	NA	NA	NA	NA
PPIAP34	0	NA	NA	NA	NA	NA
ENSG00000279625	0	NA	NA	NA	NA	NA
ZBTB40	1257.89	0.222347	0.121352	1.83224	0.0669155	0.184715
ZBTB40-IT1	0.203753	-0.93263	4.08052	-0.228556	0.819214	NA
EPHA8	1.37175	4.29768	2.29615	1.87169	0.0612499	NA
MIR6127	0	NA	NA	NA	NA	NA
C1QA	0.101771	0	4.08052	0	1	NA
ENSG00000289692	0	NA	NA	NA	NA	NA
C1QC	0	NA	NA	NA	NA	NA
C1QB	0	NA	NA	NA	NA	NA
EPHB2	25.6897	1.76934	0.526136	3.3629	0.000771279	0.00617199
MIR4684	0	NA	NA	NA	NA	NA
ENSG00000225952	0	NA	NA	NA	NA	NA
MIR4253	0	NA	NA	NA	NA	NA
LACTBL1	0	NA	NA	NA	NA	NA
TEX46	0	NA	NA	NA	NA	NA
KDM1A	3557.6	-0.033636	0.130312	-0.258119	0.796315	0.898204
ENSG00000240553	0	NA	NA	NA	NA	NA
MIR3115	0	NA	NA	NA	NA	NA
ENSG00000266802	0	NA	NA	NA	NA	NA
LUZP1	1347.77	0.403255	0.13833	2.91517	0.00355499	0.0204438
ENSG00000229010	0	NA	NA	NA	NA	NA
RNU6-514P	0	NA	NA	NA	NA	NA
RNU6-135P	0	NA	NA	NA	NA	NA
ENSG00000289014	0	NA	NA	NA	NA	NA
HTR1D	21.3845	0.808347	0.462187	1.74896	0.0802978	0.210951
ENSG00000215381	0	NA	NA	NA	NA	NA
LINC01355	32.0489	-0.468321	0.349214	-1.34107	0.179897	0.372855
ENSG00000284726	1.82012	1.46739	1.55966	0.940843	0.346785	NA
HNRNPR	12402.7	-0.192846	0.0886859	-2.17448	0.0296692	0.101679
ZNF436	1022.3	0.0970964	0.164066	0.591814	0.553975	0.747474
ZNF436-AS1	75.0308	0.103667	0.238172	0.435261	0.663373	0.820205
Y_RNA_5	0	NA	NA	NA	NA	NA
ENSG00000271420	0.107516	-0.93263	4.08052	-0.228556	0.819214	NA
TCEA3	131.238	0.446154	0.344885	1.29363	0.195793	0.394937
ENSG00000232482	0	NA	NA	NA	NA	NA
ASAP3	681.554	-0.510132	0.193509	-2.63621	0.0083837	0.0396532
E2F2	478.337	-0.451847	0.128319	-3.52128	0.00042947	0.00382752
ENSG00000235052	0.407295	-0.93263	4.08052	-0.228556	0.819214	NA
ID3	2330.57	-0.531748	0.232904	-2.28312	0.0224234	0.0823441
ENSG00000285802	0.753789	-3.4004	2.5793	-1.31834	0.187388	NA
MDS2	4.25461	0.393494	1.15974	0.339294	0.734389	0.862279
ENSG00000229239	0	NA	NA	NA	NA	NA
RPL11	21399.9	-0.0306278	0.0734142	-0.417191	0.676538	0.828297
ELOA-AS1	22.2433	-0.616269	0.663771	-0.928437	0.353181	0.578246
ELOA	2144.6	-0.116643	0.109472	-1.0655	0.286649	0.507216
PITHD1	1402.24	-0.159834	0.108161	-1.47774	0.139477	0.313146
LYPLA2	1461.82	0.203927	0.105858	1.92642	0.0540514	0.157927
GALE	609.484	0.221098	0.21271	1.03943	0.298604	0.519789
HMGCL	414.2	0.329468	0.176072	1.87122	0.0613148	0.173263
FUCA1	1251.66	0.633151	0.225564	2.80696	0.00500113	0.0267047
CNR2	0.203541	0	4.08052	0	1	NA
BTBD6P1	0	NA	NA	NA	NA	NA
ENSG00000232557	0	NA	NA	NA	NA	NA
MIR378F	0	NA	NA	NA	NA	NA
H3P1	0	NA	NA	NA	NA	NA
PNRC2	7300.91	0.0977439	0.0909849	1.07429	0.282694	0.502914
SRSF10	3678.98	-0.34174	0.0993225	-3.44071	0.000580195	0.00486229
ENSG00000215905	0	NA	NA	NA	NA	NA
ENSG00000225315	0.107516	-0.93263	4.08052	-0.228556	0.819214	NA
MYOM3	0	NA	NA	NA	NA	NA
MYOM3-AS1	0	NA	NA	NA	NA	NA
IL22RA1	0.576473	-1.49989	2.93459	-0.511108	0.609275	NA
IFNLR1	97.4185	0.274313	0.274017	1.00108	0.316788	0.539982
GRHL3	838.514	1.24268	0.160595	7.73795	1.01033e-14	1.72108e-12
LINC02800	0	NA	NA	NA	NA	NA
GRHL3-AS1	0.103725	0.990947	4.08052	0.242848	0.808123	NA
STPG1	130.669	0.333161	0.212947	1.56452	0.117695	0.278122
NIPAL3	412.125	0.0905233	0.133354	0.678821	0.497251	0.705157
ENSG00000288982	0.3591	0.0291586	3.98009	0.00732611	0.994155	NA
RCAN3AS	0.360352	1.95337	4.03209	0.484455	0.628063	NA
RCAN3	668.666	0.40524	0.144223	2.80982	0.00495696	0.0264929
NCMAP-DT	0	NA	NA	NA	NA	NA
NCMAP	11.7827	0.0339868	0.560274	0.060661	0.951629	0.978034
ENSG00000227312	0	NA	NA	NA	NA	NA
Y_RNA_6	0	NA	NA	NA	NA	NA
SRRM1	4016.13	-0.109596	0.0887134	-1.23539	0.216686	0.422753
ENSG00000284699	0	NA	NA	NA	NA	NA
CLIC4	18591.5	-0.283376	0.143985	-1.96809	0.0490577	0.147383
RNU6-1208P	0	NA	NA	NA	NA	NA
RUNX3	3.24807	-0.0954118	1.21478	-0.0785424	0.937397	0.970393
MIR6731	0	NA	NA	NA	NA	NA
RUNX3-AS1	0.114941	-0.93263	4.08052	-0.228556	0.819214	NA
ENSG00000261025	0	NA	NA	NA	NA	NA
MIR4425	0	NA	NA	NA	NA	NA
LINC02793	0	NA	NA	NA	NA	NA
ENSG00000233755	0	NA	NA	NA	NA	NA
IFITM3P7	0	NA	NA	NA	NA	NA
ENSG00000231953	0.324199	0.935284	4.03699	0.231678	0.816788	NA
SYF2	1402.01	0.136078	0.097459	1.39626	0.162636	0.348603
ENSG00000284602	8.10499	-0.20871	0.666852	-0.312978	0.754297	0.873735
ENSG00000284657	0.771949	1.89554	2.43138	0.779615	0.435618	NA
RSRP1	475.371	0.679489	0.160751	4.22697	2.36855e-05	0.000362868
ENSG00000272432	0.528044	-1.44595	3.5804	-0.403852	0.686322	NA
ENSG00000261349	0	NA	NA	NA	NA	NA
RHD	1.52409	1.79759	1.80521	0.995779	0.319357	NA
SDHDP6	0	NA	NA	NA	NA	NA
ENSG00000259984	0	NA	NA	NA	NA	NA
TMEM50A	1584.68	0.22388	0.127851	1.75109	0.0799298	0.210181
RHCE	1.36405	0.0132924	2.09756	0.00633709	0.994944	NA
ENSG00000238084	0	NA	NA	NA	NA	NA
MACO1	475.941	0.214153	0.138421	1.54711	0.121836	0.284945
LDLRAP1	1700.92	0.399597	0.21104	1.89346	0.0582961	0.167103
ENSG00000225643	0.412828	-0.93263	4.08052	-0.228556	0.819214	NA
MAN1C1	1861.41	1.94383	0.450679	4.31311	1.60971e-05	0.0002629
ENSG00000233478	6.9972	1.30696	0.849772	1.53801	0.124046	0.288568
SELENON	3557.93	0.448838	0.116532	3.85162	0.000117337	0.00134471
ENSG00000255054	0.561851	2.91225	3.4254	0.850193	0.395218	NA
ENSG00000228172	12.0662	0.170215	0.631118	0.269704	0.787388	0.89308
MTFR1L	1125.42	0.27755	0.101042	2.74688	0.00601647	0.0308773
ENSG00000272478	0	NA	NA	NA	NA	NA
AUNIP	559.52	-0.192262	0.123434	-1.55761	0.119326	0.280719
ENSG00000236528	1.76198	2.65459	1.98805	1.33528	0.181786	NA
PAQR7	535.969	0.36515	0.256355	1.42439	0.154333	0.336287
Y_RNA_7	0	NA	NA	NA	NA	NA
STMN1	3507.9	-0.397115	0.168116	-2.36214	0.0181697	0.0704986
SNRPFP2	0	NA	NA	NA	NA	NA
ENSG00000223624	0	NA	NA	NA	NA	NA
MIR3917	0	NA	NA	NA	NA	NA
PAFAH2	635.728	0.117241	0.103579	1.1319	0.257678	0.474866
RNU6-110P	0	NA	NA	NA	NA	NA
ENSG00000252190	0	NA	NA	NA	NA	NA
ENSG00000252691	0	NA	NA	NA	NA	NA
EXTL1	55.3329	0.166816	0.477878	0.349076	0.727032	0.857881
SLC30A2	852.785	-0.63072	0.23104	-2.72992	0.00633503	0.0320901
ENSG00000284309	18.537	1.13882	0.525731	2.16617	0.030298	0.10331
TRIM63	24.6039	1.05655	0.602894	1.75246	0.0796941	0.209787
PDIK1L	266.509	-0.216302	0.154227	-1.40249	0.160768	0.345653
FAM110D	0.314649	0.990947	4.08052	0.242848	0.808123	NA
C1orf232	0	NA	NA	NA	NA	NA
ZNF593OS	5.28089	-0.34078	1.11019	-0.306956	0.758877	0.877014
ZNF593	303.661	-0.317274	0.145829	-2.17566	0.0295811	0.101456
CNKSR1	325.478	0.318012	0.198377	1.60307	0.10892	0.263148
CATSPER4	0.226049	0.0291586	4.08052	0.00714579	0.994299	NA
ZPLD2P	27.9587	0.339903	0.410894	0.827226	0.408109	0.628578
ENSG00000278572	0	NA	NA	NA	NA	NA
CEP85	3274.61	0.236865	0.226612	1.04525	0.295909	0.516994
ENSG00000270733	0	NA	NA	NA	NA	NA
SH3BGRL3	510.157	0.882259	0.119735	7.36846	1.72608e-13	2.29582e-11
UBXN11	190.365	-0.391799	0.202184	-1.93784	0.0526433	0.154821
CD52	1.54831	1.97988	1.71568	1.15399	0.248504	NA
CRYBG2	3022.96	0.254994	0.192552	1.32428	0.185409	0.380062
ENSG00000225854	0	NA	NA	NA	NA	NA
ZNF683	0.342242	0.963568	4.0102	0.240279	0.810114	NA
LIN28A	4.57056	0.599871	1.1265	0.532507	0.594375	0.774257
DHDDS	843.39	-0.126368	0.0954576	-1.32381	0.185565	0.380201
ENSG00000223583	0	NA	NA	NA	NA	NA
DHDDS-AS1	1.42259	-0.542546	1.65744	-0.327341	0.74341	NA
HMGN2	9038.05	-0.634247	0.124005	-5.11468	3.14276e-07	8.87097e-06
DPPA2P2	0	NA	NA	NA	NA	NA
RPS6KA1	792.552	0.027679	0.133791	0.206883	0.836102	0.919937
MIR1976	0	NA	NA	NA	NA	NA
RN7SL679P	0	NA	NA	NA	NA	NA
Y_RNA_8	0	NA	NA	NA	NA	NA
RNU7-29P	0	NA	NA	NA	NA	NA
ENSG00000289452	0	NA	NA	NA	NA	NA
ENSG00000229247	0	NA	NA	NA	NA	NA
ENSG00000238316	0	NA	NA	NA	NA	NA
ENSG00000235069	0	NA	NA	NA	NA	NA
ENSG00000260063	4.07956	-1.58635	1.08121	-1.4672	0.142322	0.317585
ARID1A	2429.27	0.123377	0.110869	1.11282	0.265786	0.48397
PIGV	352.424	-0.0616964	0.118301	-0.521521	0.602004	0.780728
RN7SL165P	0	NA	NA	NA	NA	NA
ENSG00000287810	0	NA	NA	NA	NA	NA
ZDHHC18	1496.12	-0.0765045	0.0827491	-0.924535	0.355208	0.579667
SFN	189.785	0.345261	0.45425	0.760068	0.447214	0.66377
GPN2	532.482	0.0711747	0.104292	0.682454	0.494952	0.703235
ENSG00000226698	0	NA	NA	NA	NA	NA
ENSG00000289554	38.8231	0.267388	0.364829	0.732915	0.46361	0.677397
GPATCH3	421.327	-0.00513046	0.175774	-0.0291879	0.976715	0.99008
NUDC	2511.9	-0.37139	0.112356	-3.30548	0.000948136	0.00725018
NR0B2	0.547696	1.53788	2.97264	0.517345	0.604916	NA
KDF1	193.027	0.277856	0.187072	1.48529	0.137467	0.310086
RPL12P13	0	NA	NA	NA	NA	NA
RPL32P6	0	NA	NA	NA	NA	NA
OSTCP2	0	NA	NA	NA	NA	NA
TRNP1	27.0632	1.12991	0.442912	2.55109	0.0107387	0.0477071
TENT5B	219.728	0.981113	0.24508	4.00324	6.24804e-05	0.000805409
SLC9A1	4085.53	0.146638	0.120521	1.2167	0.22372	0.431916
ENSG00000229985	0	NA	NA	NA	NA	NA
CHCHD3P3	0	NA	NA	NA	NA	NA
NPM1P39	0	NA	NA	NA	NA	NA
SNRPEP7	0	NA	NA	NA	NA	NA
WDTC1-DT	0	NA	NA	NA	NA	NA
WDTC1	620.43	0.490808	0.165359	2.96813	0.00299618	0.0179458
Y_RNA_9	0	NA	NA	NA	NA	NA
ENSG00000243659	0	NA	NA	NA	NA	NA
TMEM222	450.473	0.0133702	0.132072	0.101234	0.919365	0.960543
RNU6-48P	0	NA	NA	NA	NA	NA
ACTG1P20	0	NA	NA	NA	NA	NA
SYTL1	121.567	1.29408	0.284829	4.54335	5.53684e-06	0.000106942
MAP3K6	103.233	0.432876	0.27898	1.55164	0.120748	0.28304
FCN3	0.342799	1.85463	4.00034	0.463618	0.642922	NA
CD164L2	4.74002	1.50511	0.894024	1.68352	0.0922748	0.233641
ENSG00000231207	0	NA	NA	NA	NA	NA
GPR3	13.8649	-0.698343	0.54123	-1.29029	0.19695	0.39612
WASF2	4408.66	0.275848	0.144847	1.90441	0.0568566	0.163859
ENSG00000241169	0	NA	NA	NA	NA	NA
ENSG00000237429	0	NA	NA	NA	NA	NA
AHDC1	250.266	0.959706	0.252964	3.79384	0.000148333	0.00163172
FGR	0	NA	NA	NA	NA	NA
ENSG00000235912	0	NA	NA	NA	NA	NA
LINC02574	14.9376	-0.130293	0.503534	-0.258758	0.795822	0.898004
IFI6	10816.9	1.09193	0.187638	5.81935	5.9076e-09	2.65948e-07
ENSG00000225886	10.931	0.590315	0.843765	0.69962	0.484165	0.694972
RNU6-949P	0	NA	NA	NA	NA	NA
CHMP1AP1	0	NA	NA	NA	NA	NA
RNU6-424P	0	NA	NA	NA	NA	NA
ENSG00000287244	0	NA	NA	NA	NA	NA
FAM76A	500.76	0.490548	0.198557	2.47056	0.01349	0.0565937
ENSG00000231344	0	NA	NA	NA	NA	NA
RPEP3	0	NA	NA	NA	NA	NA
STX12	1349.99	0.14541	0.0935891	1.5537	0.120255	0.282337
ENSG00000269971	0.114941	-0.93263	4.08052	-0.228556	0.819214	NA
ENSG00000270031	0.222216	1.89707	4.03699	0.469922	0.638411	NA
RNU6-1245P	0	NA	NA	NA	NA	NA
ENSG00000286433	0.239074	0.990947	4.08052	0.242848	0.808123	NA
PPP1R8	1701.74	-0.123757	0.0803564	-1.5401	0.123536	0.287732
SCARNA1	0.537697	1.95337	4.03209	0.484456	0.628062	NA
THEMIS2	51.591	0.0933988	0.311504	0.299832	0.764306	0.879836
RPA2	1328.25	-0.402162	0.0961696	-4.1818	2.89211e-05	0.00042491
SMPDL3B	91.2701	0.697811	0.348498	2.00234	0.0452484	0.138643
ENSG00000227050	0	NA	NA	NA	NA	NA
XKR8	487.663	0.224043	0.181804	1.23233	0.217825	0.424314
EYA3	1594.15	-0.0795387	0.114879	-0.692369	0.488706	0.698202
ENSG00000238231	0	NA	NA	NA	NA	NA
RN7SL559P	0.114941	-0.93263	4.08052	-0.228556	0.819214	NA
SPCS2P4	0	NA	NA	NA	NA	NA
ENSG00000228943	0	NA	NA	NA	NA	NA
ENSG00000289576	0	NA	NA	NA	NA	NA
ENSG00000214812	0	NA	NA	NA	NA	NA
RNU6-176P	0	NA	NA	NA	NA	NA
PTAFR	48.5312	-0.35218	0.53583	-0.65726	0.511014	0.715686
DNAJC8	3803.49	-0.0533759	0.0722591	-0.738673	0.460105	0.674777
ATP5IF1	893.945	-0.00174766	0.109533	-0.0159556	0.98727	0.994889
ENSG00000270605	60.1265	-0.0236154	0.253316	-0.0932249	0.925725	0.964452
ENSG00000271398	0.103725	0.990947	4.08052	0.242848	0.808123	NA
SESN2	1111.34	-0.141811	0.178289	-0.795401	0.426381	0.645787
MED18	426.48	-0.0783408	0.131873	-0.594064	0.55247	0.746419
PHACTR4	1154.18	-0.0153865	0.132991	-0.115696	0.907893	0.955056
Y_RNA_10	0	NA	NA	NA	NA	NA
ENSG00000229820	0	NA	NA	NA	NA	NA
RNU6ATAC27P	0	NA	NA	NA	NA	NA
RCC1	3117.65	-0.534612	0.0942351	-5.67317	1.40177e-08	5.60611e-07
SNHG3	1000.88	-0.285257	0.128652	-2.21728	0.0266038	0.0935476
SNORA73A	0	NA	NA	NA	NA	NA
SNORA73B	3.37999	-0.112023	1.21198	-0.0924296	0.926357	0.964824
PRDX3P2	0	NA	NA	NA	NA	NA
ENSG00000279443	0	NA	NA	NA	NA	NA
TRNAU1AP	434.817	0.0687915	0.120599	0.570416	0.568395	0.756605
SNHG12	619.423	-0.25869	0.148276	-1.74466	0.0810447	0.212532
SNORD99	0	NA	NA	NA	NA	NA
SNORA61	0	NA	NA	NA	NA	NA
SNORA44	0	NA	NA	NA	NA	NA
SNORA16A_1	0	NA	NA	NA	NA	NA
SNORA16A_2	0	NA	NA	NA	NA	NA
TAF12	735.601	-0.0557234	0.113087	-0.492748	0.622191	0.793669
RAB42	8.29766	1.38618	0.734548	1.88713	0.0591434	0.16898
TAF12-DT	0.670819	-1.47157	2.54287	-0.578704	0.562789	NA
ENSG00000270103	2.35965	1.83611	1.78575	1.0282	0.303857	NA
RNU11	0.784928	1.49406	3.82739	0.39036	0.696271	NA
GMEB1	880.466	0.0231001	0.140166	0.164805	0.869098	0.937327
ENSG00000252777	0	NA	NA	NA	NA	NA
ENSG00000289291	53.8552	-0.182564	0.303467	-0.601593	0.547445	0.74289
YTHDF2	5678.5	0.0273559	0.0968942	0.282328	0.777692	0.887657
OPRD1	7.12878	-0.306404	0.826313	-0.370809	0.71078	0.847712
ENSG00000233427	0.329973	-2.4373	3.99328	-0.61035	0.54163	NA
Y_RNA_11	0	NA	NA	NA	NA	NA
EPB41	1165.6	0.0568089	0.109299	0.519759	0.603232	0.781504
ENSG00000225616	0	NA	NA	NA	NA	NA
Y_RNA_12	0	NA	NA	NA	NA	NA
Metazoa_SRP_1	0	NA	NA	NA	NA	NA
TMEM200B	9.3837	1.44169	0.675473	2.13434	0.0328149	0.109698
ENSG00000225750	0	NA	NA	NA	NA	NA
SRSF4	2754.37	-0.0962769	0.0904813	-1.06405	0.287305	0.507874
ENSG00000277916	0	NA	NA	NA	NA	NA
MECR	430.874	-0.397048	0.139144	-2.85349	0.00432414	0.0238589
ENSG00000237934	0.423815	-2.36263	3.71906	-0.635276	0.525248	NA
PTPRU	2780.49	0.17572	0.136234	1.28984	0.197105	0.396278
LINC01756	0	NA	NA	NA	NA	NA
ENSG00000225011	0	NA	NA	NA	NA	NA
ENSG00000228176	0	NA	NA	NA	NA	NA
ENSG00000284676	0	NA	NA	NA	NA	NA
ENSG00000270927	0	NA	NA	NA	NA	NA
LINC01648	0	NA	NA	NA	NA	NA
ENSG00000233372	0	NA	NA	NA	NA	NA
ENSG00000231251	0	NA	NA	NA	NA	NA
ENSG00000236335	0	NA	NA	NA	NA	NA
ENSG00000231949	0	NA	NA	NA	NA	NA
ENSG00000289710	0	NA	NA	NA	NA	NA
MATN1	1.06172	-0.517784	2.76094	-0.187539	0.851238	NA
MATN1-AS1	11.3408	0.0553746	0.628218	0.0881455	0.929761	0.96665
ENSG00000287510	0.232385	1.95337	4.03209	0.484455	0.628063	NA
LAPTM5	1.86167	1.58445	1.46653	1.08041	0.279962	NA
MIR4420	0	NA	NA	NA	NA	NA
ENSG00000229607	0	NA	NA	NA	NA	NA
LINC01778	0.116193	0.990947	4.08052	0.242848	0.808123	NA
RN7SKP91	0	NA	NA	NA	NA	NA
ENSG00000235143	0	NA	NA	NA	NA	NA
SDC3	1207.61	-0.017658	0.176767	-0.0998941	0.920428	0.961044
RN7SL371P	0	NA	NA	NA	NA	NA
PUM1	4119.41	0.176727	0.0820293	2.15444	0.0312055	0.105563
ENSG00000237329	0	NA	NA	NA	NA	NA
ENSG00000232768	0	NA	NA	NA	NA	NA
SELENOWP1	0	NA	NA	NA	NA	NA
ENSG00000225142	0	NA	NA	NA	NA	NA
NKAIN1	11.3138	0.425614	0.623083	0.683077	0.494558	0.703029
SNRNP40	1850.16	-0.277091	0.115477	-2.39953	0.016416	0.0654293
ENSG00000229447	0	NA	NA	NA	NA	NA
ZCCHC17	801.801	-0.150031	0.0954297	-1.57216	0.115914	0.275398
ENSG00000229044	0	NA	NA	NA	NA	NA
FABP3	7.06554	-0.0248512	0.882352	-0.0281648	0.977531	0.990392
SERINC2	1625.02	0.0387897	0.182315	0.212762	0.831513	0.917533
ENSG00000215899	0	NA	NA	NA	NA	NA
RNU6-40P	0	NA	NA	NA	NA	NA
LDC1P	0	NA	NA	NA	NA	NA
Y_RNA_13	0	NA	NA	NA	NA	NA
LINC01226	1.68841	0.680215	1.70854	0.398126	0.690537	NA
ENSG00000229167	5.32066	-0.830139	0.866578	-0.957952	0.338087	0.562744
TINAGL1	3931.81	0.312364	0.187671	1.66442	0.0960277	0.240326
HCRTR1	1.63552	1.37998	1.53944	0.896418	0.370029	NA
PEF1	1299.92	0.0596403	0.118407	0.503689	0.61448	0.788971
PEF1-AS1	4.58233	0.353637	1.20744	0.292881	0.769613	0.883154
ENSG00000264078	0.571953	-1.89735	3.0071	-0.630956	0.528069	NA
COL16A1	34.0755	0.464881	0.506931	0.917049	0.359117	0.583528
ADGRB2	234.08	0.497232	0.251051	1.9806	0.0476364	0.144348
MIR4254	0	NA	NA	NA	NA	NA
ENSG00000254545	0	NA	NA	NA	NA	NA
SPOCD1	7.75478	1.32943	0.767618	1.73189	0.0832926	0.216936
ENSG00000203620	0.762811	-0.0383979	2.3554	-0.0163021	0.986993	NA
ENSG00000269967	0	NA	NA	NA	NA	NA
PTP4A2	4891.15	0.31828	0.107371	2.9643	0.00303372	0.0180933
ENSG00000288678	0	NA	NA	NA	NA	NA
ENSG00000228634	0	NA	NA	NA	NA	NA
ENSG00000284702	0.127966	0	4.08052	0	1	NA
KHDRBS1	6566.82	-0.272492	0.0954113	-2.85597	0.00429049	0.023712
ENSG00000203325	1.21357	-1.00498	2.05962	-0.487946	0.625588	NA
TMEM39B	258.658	-0.33523	0.139313	-2.40631	0.0161147	0.0645656
MIR5585	0	NA	NA	NA	NA	NA
Metazoa_SRP_2	0	NA	NA	NA	NA	NA
KPNA6	6376.32	0.0337665	0.121222	0.27855	0.78059	0.889408
ENSG00000250135	0.530105	-1.82677	3.43628	-0.531613	0.594994	NA
TXLNA	1872	-0.280415	0.077293	-3.62794	0.000285689	0.00274089
CCDC28B	34.0937	0.612918	0.413941	1.48069	0.138689	0.311815
ENSG00000224066	0.449491	0.935045	3.73831	0.250125	0.802491	NA
IQCC	54.1156	-0.246529	0.278353	-0.88567	0.375795	0.599773
DCDC2B	0.103725	0.990947	4.08052	0.242848	0.808123	NA
TMEM234	70.5847	0.250616	0.232224	1.0792	0.2805	0.500736
EIF3I	4581.21	-0.19102	0.101553	-1.88099	0.0599731	0.170619
MTMR9LP	10.4018	0.265558	0.649828	0.408659	0.68279	0.832424
FAM167B	0.423815	-2.36263	3.71906	-0.635276	0.525248	NA
LCK	26.1546	-5.84339	2.46821	-2.36746	NA	NA
Metazoa_SRP_3	0	NA	NA	NA	NA	NA
Y_RNA_14	0	NA	NA	NA	NA	NA
HDAC1	3752.63	-0.227013	0.115783	-1.96067	0.0499171	0.149202
MARCKSL1	1035.05	0.547508	0.218728	2.50315	0.0123094	0.0528035
ENSG00000233775	0	NA	NA	NA	NA	NA
TSSK3	2.78583	1.37072	1.76645	0.775975	0.437764	0.656084
FAM229A	37.2684	0.324551	0.390203	0.83175	0.40555	0.626507
BSDC1	1693.06	0.123116	0.128405	0.958814	0.337653	0.562285
GAPDHP20	0	NA	NA	NA	NA	NA
ENSG00000270850	0	NA	NA	NA	NA	NA
LRRC37A12P	0	NA	NA	NA	NA	NA
RN7SL122P	0	NA	NA	NA	NA	NA
ENSG00000254553	9.79974	-2.30811	1.21059	-1.90659	0.0565737	0.163339
ZBTB8B	73.8376	-0.0131667	0.272804	-0.0482643	0.961506	0.982856
ZBTB8A	124.983	-0.103683	0.21367	-0.485251	0.627499	0.797031
ZBTB8OS	439.367	-0.321997	0.1605	-2.00621	0.0448337	0.137791
Y_RNA_15	0	NA	NA	NA	NA	NA
RBBP4	4621.67	-0.419115	0.116175	-3.60763	0.000309009	0.00292528
SYNC	344.687	0.327667	0.14022	2.33681	0.0194492	0.0741841
ENSG00000224409	0	NA	NA	NA	NA	NA
KIAA1522	1224.89	1.17593	0.206218	5.70234	1.18174e-08	4.85896e-07
YARS1	3537.24	-0.609061	0.16021	-3.80164	0.000143742	0.00159524
S100PBP	781.921	-0.170523	0.188967	-0.902398	0.366846	0.590891
FNDC5	3.12675	-0.0864552	1.62955	-0.0530546	0.957688	0.980564
HPCA	2.11898	0.337874	1.52264	0.2219	0.824391	NA
TMEM54	349.02	0.15974	0.13565	1.17759	0.238959	0.451313
ENSG00000287691	0.112334	0	4.08052	0	1	NA
RNF19B	1285.08	-0.460407	0.145976	-3.15398	0.00161058	0.0110155
ENSG00000278966	0	NA	NA	NA	NA	NA
ENSG00000217644	0	NA	NA	NA	NA	NA
ENSG00000239670	0	NA	NA	NA	NA	NA
ENSG00000236065	0.413464	-2.76962	3.97564	-0.696648	0.486023	NA
AK2	4933.63	-0.301644	0.12742	-2.36733	0.017917	0.0698731
Metazoa_SRP_4	0	NA	NA	NA	NA	NA
AZIN2	28.6894	0.682194	0.366433	1.86172	0.0626433	0.17586
ENSG00000278997	0	NA	NA	NA	NA	NA
TRIM62	241.257	0.178625	0.195831	0.912135	0.361698	0.585716
ENSG00000279179	0	NA	NA	NA	NA	NA
ENSG00000284721	0	NA	NA	NA	NA	NA
ZNF362	506.41	0.21856	0.191093	1.14373	0.252734	0.468608
ENSG00000270115	0.775732	0.0532571	2.28079	0.0233503	0.981371	NA
A3GALT2	0	NA	NA	NA	NA	NA
ENSG00000225313	11.0579	0.604598	0.579764	1.04283	0.297025	0.518222
PHC2	1413.76	0.108469	0.101158	1.07227	0.283597	0.503908
MIR3605	0	NA	NA	NA	NA	NA
RN7SKP16	0.337003	0	4.08052	0	1	NA
PHC2-AS1	0.114941	-0.93263	4.08052	-0.228556	0.819214	NA
TLR12P	0	NA	NA	NA	NA	NA
ZSCAN20	147.233	0.176938	0.267763	0.6608	0.50874	0.714195
ENSG00000235907	0	NA	NA	NA	NA	NA
CSMD2	0	NA	NA	NA	NA	NA
HSPD1P14	0	NA	NA	NA	NA	NA
HMGB4	0	NA	NA	NA	NA	NA
CSMD2-AS1	0	NA	NA	NA	NA	NA
RNA5SP42	0	NA	NA	NA	NA	NA
C1orf94	0	NA	NA	NA	NA	NA
ENSG00000270241	0	NA	NA	NA	NA	NA
ENSG00000287703	0	NA	NA	NA	NA	NA
MIR552	0	NA	NA	NA	NA	NA
SMIM12	792.61	-0.154217	0.143069	-1.07792	0.281069	0.501293
GJB5	10.8375	2.16293	0.841791	2.56943	0.0101865	0.0459696
GJB4	6.48839	1.16135	0.880649	1.31875	0.187254	0.382458
ENSG00000255811	0.111108	0.990947	4.08052	0.242848	0.808123	NA
GJB3	9.39996	1.15034	1.00727	1.14203	0.25344	0.469445
GJA4	0.437881	2.49263	3.69005	0.675501	0.499357	NA
ENSG00000230163	0	NA	NA	NA	NA	NA
DLGAP3	1.11227	-0.00249551	1.7525	-0.00142398	0.998864	NA
ENSG00000284773	11.7281	-0.318021	0.70923	-0.448403	0.653862	0.814405
GPR199P	2.00277	-0.88157	2.69136	-0.327556	0.743248	NA
ENSG00000271741	62.1141	-0.121176	0.311463	-0.389052	0.697237	0.840455
TMEM35B	114.631	-0.411277	0.267564	-1.53712	0.124265	0.288816
ZMYM6	264.331	-0.127953	0.173867	-0.735928	0.461775	0.676122
ZMYM1	720.073	-0.384822	0.128715	-2.98971	0.00279239	0.0170406
RPL12P45	0	NA	NA	NA	NA	NA
EFCAB14P1	0	NA	NA	NA	NA	NA
ENSG00000284640	1.54254	-2.84629	1.97177	-1.44352	0.148875	NA
SFPQ	11050.6	-0.415962	0.076681	-5.42459	5.80893e-08	1.97203e-06
Y_RNA_16	0	NA	NA	NA	NA	NA
ZMYM4	2172.73	-0.168775	0.105633	-1.59775	0.1101	0.265269
RN7SL503P	0	NA	NA	NA	NA	NA
SNORA62_1	0	NA	NA	NA	NA	NA
RPL5P4	0	NA	NA	NA	NA	NA
ZMYM4-AS1	0.621823	-2.34144	3.42025	-0.684582	0.493608	NA
Metazoa_SRP_5	0	NA	NA	NA	NA	NA
KIAA0319L	2495.22	0.355682	0.0841437	4.22708	2.36745e-05	0.000362868
ENSG00000236274	0	NA	NA	NA	NA	NA
NCDN	376.356	-0.0713939	0.202252	-0.352995	0.724092	0.856093
TFAP2E-AS1	1.01116	-0.97319	2.33671	-0.416479	0.677059	NA
TFAP2E	2.6098	0.508409	1.3974	0.363825	0.715988	NA
PSMB2	3690.78	-0.0226465	0.0742605	-0.30496	0.760397	0.878019
C1orf216	106.6	-0.23751	0.221988	-1.06992	0.284655	0.505277
CLSPN	1259.63	-0.762305	0.141085	-5.40317	6.54752e-08	2.17605e-06
ENSG00000232335	0.857896	0.0958188	3.06343	0.0312783	0.975048	NA
AGO4	521.393	0.321003	0.153681	2.08877	0.0367285	0.119305
AGO1	1066.27	-0.0416846	0.113194	-0.368259	0.71268	0.848471
CFAP97P1	0	NA	NA	NA	NA	NA
ENSG00000286899	0.101771	0	4.08052	0	1	NA
ENSG00000271914	0	NA	NA	NA	NA	NA
AGO3	523.664	-0.10205	0.137453	-0.742432	0.457826	0.672865
ENSG00000271554	0	NA	NA	NA	NA	NA
ENSG00000232862	0	NA	NA	NA	NA	NA
TEKT2	2.04319	-0.786926	1.37925	-0.570546	0.568308	NA
ADPRS	603.128	-0.0358979	0.11446	-0.313628	0.753804	0.873537
COL8A2	6.03236	1.69651	0.805267	2.10676	0.0351381	0.115405
TRAPPC3	1467.44	-0.127447	0.100981	-1.26209	0.206918	0.410354
MAP7D1	1908.72	0.0429258	0.0964889	0.444878	0.656408	0.815609
RN7SL131P	0	NA	NA	NA	NA	NA
THRAP3	6594.8	-0.0518637	0.0747	-0.694293	0.487499	0.697045
UBE2V2P4	0	NA	NA	NA	NA	NA
SH3D21	1018.69	0.125257	0.157783	0.793854	0.427281	0.646392
EVA1B	450.607	-0.22156	0.258144	-0.858281	0.390737	0.613799
ENSG00000286379	4.70144	0.571179	0.989547	0.577213	0.563796	0.754061
STK40	1897.66	0.218336	0.189599	1.15157	0.249498	0.464406
LSM10	420.306	-0.271776	0.150043	-1.81132	0.0700908	0.191164
RNU4-27P	0	NA	NA	NA	NA	NA
OSCP1	112.568	-0.562403	0.315242	-1.78403	0.0744181	0.19981
SNORA63C	0	NA	NA	NA	NA	NA
MRPS15	2146.25	-0.463544	0.0979218	-4.73381	2.20339e-06	4.83195e-05
CSF3R	4174.5	0.0261007	0.242074	0.107821	0.914137	0.958065
FTLP18	0	NA	NA	NA	NA	NA
ENSG00000284705	0	NA	NA	NA	NA	NA
ENSG00000284720	0	NA	NA	NA	NA	NA
ENSG00000234481	0	NA	NA	NA	NA	NA
GRIK3	0	NA	NA	NA	NA	NA
ENSG00000284650	0.101982	-0.93263	4.08052	-0.228556	0.819214	NA
ENSG00000223944	2.21565	-2.86576	1.74331	-1.64386	0.100204	NA
MIR4255	0	NA	NA	NA	NA	NA
RNU6-636P	0	NA	NA	NA	NA	NA
RNA5SP43	0	NA	NA	NA	NA	NA
RPS29P6	0	NA	NA	NA	NA	NA
ZC3H12A-DT	41.4259	0.238743	0.367592	0.649476	0.516031	0.718921
ZC3H12A	169.064	0.468917	0.168643	2.78053	0.00542695	0.0284761
MIR6732	0	NA	NA	NA	NA	NA
MEAF6	827.706	-0.29786	0.119898	-2.48428	0.0129815	0.0549035
MIR5581	0	NA	NA	NA	NA	NA
SNIP1	740.301	-0.287525	0.158346	-1.8158	0.0694003	0.189762
FTH1P1	0	NA	NA	NA	NA	NA
ENSG00000237749	0	NA	NA	NA	NA	NA
DNALI1	33.3316	0.335036	0.437544	0.76572	0.443843	0.660833
GNL2	2024.61	-0.590215	0.135961	-4.34105	1.41805e-05	0.000235988
ENSG00000284748	0.101771	0	4.08052	0	1	NA
RSPO1	11.907	-1.83581	0.800547	-2.29319	0.021837	0.0807312
C1orf109	499.173	-0.407236	0.163603	-2.48918	0.012804	0.0543519
CDCA8	981.462	-0.572059	0.111501	-5.13053	2.88929e-07	8.2083e-06
EPHA10	14.7704	-0.411071	0.594479	-0.69148	0.489264	0.698657
Y_RNA_17	0	NA	NA	NA	NA	NA
ACTN4P2	0	NA	NA	NA	NA	NA
ENSG00000227416	0	NA	NA	NA	NA	NA
MANEAL	116.601	-0.974004	0.347381	-2.80385	0.00504965	0.0269094
ENSG00000233728	0.657947	0	3.25228	0	1	NA
YRDC	904.289	-0.387791	0.130963	-2.96107	0.00306576	0.0182352
C1orf122	346.707	-0.292652	0.124427	-2.35199	0.0186733	0.0720544
MTF1	874.157	-0.130713	0.119185	-1.09672	0.272763	0.491761
ENSG00000235673	0	NA	NA	NA	NA	NA
ENSG00000230955	0	NA	NA	NA	NA	NA
INPP5B	671.075	-0.522211	0.111445	-4.6858	2.78869e-06	5.9491e-05
SNORA63_1	0	NA	NA	NA	NA	NA
RNU6-584P	0	NA	NA	NA	NA	NA
Metazoa_SRP_6	0	NA	NA	NA	NA	NA
SF3A3	2442.47	-0.593444	0.114431	-5.18604	2.14811e-07	6.32305e-06
RNU6-510P	0	NA	NA	NA	NA	NA
FHL3	70.7352	0.0722005	0.254638	0.283542	0.776761	0.88734
UTP11	1065.51	-0.314386	0.129634	-2.42518	0.0153006	0.0620542
POU3F1	3.26185	-0.480714	1.25481	-0.383098	0.701647	0.842799
MIR3659HG	0.112334	0	4.08052	0	1	NA
ENSG00000223589	0	NA	NA	NA	NA	NA
MIR3659	0	NA	NA	NA	NA	NA
LINC02786	0	NA	NA	NA	NA	NA
ENSG00000286552	0	NA	NA	NA	NA	NA
ENSG00000287987	0.107516	-0.93263	4.08052	-0.228556	0.819214	NA
LINC01343	0	NA	NA	NA	NA	NA
ENSG00000275350	0	NA	NA	NA	NA	NA
RNU6-753P	0	NA	NA	NA	NA	NA
LINC01685	0	NA	NA	NA	NA	NA
HSPA5P1	0	NA	NA	NA	NA	NA
ENSG00000284632	0	NA	NA	NA	NA	NA
RRAGC	2451.58	0.220142	0.151868	1.44957	0.147179	0.325076
ENSG00000273637	6.54118	-0.373688	1.10855	-0.337096	0.736044	0.863242
RRAGC-DT	26.1135	0.20933	0.492511	0.425026	0.670817	0.824758
MYCBP	1722.63	-0.0373174	0.143715	-0.259661	0.795125	0.898004
ENSG00000274944	2.91308	-2.23546	2.04905	-1.09097	0.275284	0.495159
GJA9	1.0949	-3.19467	2.55522	-1.25025	0.211207	NA
RHBDL2	3.70228	0.414342	1.0154	0.408057	0.683232	0.832458
RNU6-605P	0	NA	NA	NA	NA	NA
Y_RNA_18	0	NA	NA	NA	NA	NA
EIF1P2	0	NA	NA	NA	NA	NA
AKIRIN1	2786.59	-0.0216464	0.131736	-0.164316	0.869482	0.937496
NDUFS5	2720.8	-0.308453	0.091016	-3.38899	0.000701497	0.00569403
MACF1	4720.61	0.773604	0.26012	2.97403	0.00293914	0.0176781
RNU6-608P	0	NA	NA	NA	NA	NA
RNA5SP44	0	NA	NA	NA	NA	NA
ENSG00000287422	0	NA	NA	NA	NA	NA
ENSG00000226438	0	NA	NA	NA	NA	NA
HSPE1P8	0	NA	NA	NA	NA	NA
BMP8A	64.4323	0.689347	0.278127	2.47853	0.0131925	0.0555446
OXCT2P1	0	NA	NA	NA	NA	NA
PPIEL	52.3326	-0.0416677	0.377708	-0.110317	0.912158	0.957412
PABPC4	7895.6	-0.14735	0.108428	-1.35897	0.174155	0.365267
PABPC4-AS1	0.444432	2.89771	3.97241	0.729458	0.465722	NA
SNORA55	0	NA	NA	NA	NA	NA
HEYL	17.8557	1.84988	0.496531	3.72561	0.000194842	0.00202657
ENSG00000225903	0	NA	NA	NA	NA	NA
NT5C1A	0.445476	1.55916	3.67372	0.424409	0.671267	NA
HPCAL4	4.14073	2.55629	1.13385	2.25453	0.024163	0.0869857
PPIE	774.553	0.0163575	0.10219	0.160069	0.872827	0.939074
ENSG00000225333	0	NA	NA	NA	NA	NA
RNU7-121P	0	NA	NA	NA	NA	NA
ENSG00000289711	0	NA	NA	NA	NA	NA
BMP8B	66.5654	2.87211	0.32509	8.83483	1.00251e-18	3.5202e-16
OXCT2	12.3106	0.178387	0.61452	0.290286	0.771597	0.884265
BMP8B-AS1	0.111108	0.990947	4.08052	0.242848	0.808123	NA
ENSG00000261798	0.231134	0.0291586	4.08052	0.00714579	0.994299	NA
ENSG00000229213	0	NA	NA	NA	NA	NA
ENSG00000284719	0.216059	0.990947	4.08052	0.242848	0.808123	NA
LINC02811	0	NA	NA	NA	NA	NA
TRIT1	761.206	-0.0219683	0.14373	-0.152844	0.878521	0.941479
Y_RNA_19	0	NA	NA	NA	NA	NA
MYCL	308.698	0.302482	0.185445	1.63111	0.102867	0.253017
MYCL-AS1	0.810321	-2.81226	2.75344	-1.02136	0.307082	NA
Y_RNA_20	0	NA	NA	NA	NA	NA
MFSD2A	1223.39	0.453306	0.619175	0.732113	0.464099	0.677773
ENSG00000228477	0	NA	NA	NA	NA	NA
CAP1	9247.6	0.239453	0.0786976	3.0427	0.00234467	0.0148564
PPT1	4144.26	0.443275	0.125381	3.53543	0.000407107	0.00367296
OAZ1P1	0	NA	NA	NA	NA	NA
RLF	1547.7	0.27381	0.198907	1.37657	0.168644	0.357004
RNU6-1237P	0	NA	NA	NA	NA	NA
TMCO2	0.112334	0	4.08052	0	1	NA
ZMPSTE24-DT	70.8561	-0.211626	0.261766	-0.808454	0.418829	0.638814
ZMPSTE24	2798.36	-0.283315	0.134355	-2.1087	0.0349703	0.114976
ENSG00000231296	0	NA	NA	NA	NA	NA
COL9A2	199.316	0.436718	0.235956	1.85084	0.064192	0.179205
ENSG00000227311	0	NA	NA	NA	NA	NA
SMAP2	493.307	0.254713	0.120926	2.10635	0.0351736	0.115493
ENSG00000213172	0	NA	NA	NA	NA	NA
ENSG00000284677	0	NA	NA	NA	NA	NA
ZFP69B	39.2831	-1.26855	0.419766	-3.02203	0.00251082	0.0156877
ENSG00000260920	20.7691	-0.0464857	0.45281	-0.10266	0.918232	0.960008
ENSG00000279667	0	NA	NA	NA	NA	NA
ZFP69	82.6737	-0.363313	0.249955	-1.45351	0.146081	0.323628
EXO5-DT	3.30433	0.412607	1.0015	0.411989	0.680347	0.830776
EXO5	112.367	0.0082789	0.235413	0.0351675	0.971946	0.987355
ENSG00000227278	0	NA	NA	NA	NA	NA
ENSG00000238186	0.329046	-0.93263	4.08052	-0.228556	0.819214	NA
ZNF684	38.852	-0.0927855	0.335682	-0.276409	0.782234	0.890583
ENSG00000286838	0	NA	NA	NA	NA	NA
ENSG00000236505	0	NA	NA	NA	NA	NA
GTF2F2P2	0	NA	NA	NA	NA	NA
RIMS3	71.4741	1.7529	0.320694	5.46594	4.60473e-08	1.60726e-06
ENSG00000287743	0	NA	NA	NA	NA	NA
ENSG00000237899	0	NA	NA	NA	NA	NA
NFYC-AS1	15.0218	-0.596112	0.514777	-1.158	0.246864	0.461575
NFYC	1093.4	-0.154199	0.120757	-1.27693	0.201626	0.402725
MIR30E	0	NA	NA	NA	NA	NA
MIR30C1	0	NA	NA	NA	NA	NA
KCNQ4	6.27805	1.43202	0.732005	1.95629	0.0504305	0.150298
RN7SL326P	0	NA	NA	NA	NA	NA
CITED4	20.9706	1.40153	0.510453	2.74566	0.00603885	0.0309469
ENSG00000229528	0	NA	NA	NA	NA	NA
ENSG00000228940	0	NA	NA	NA	NA	NA
ENSG00000286668	0	NA	NA	NA	NA	NA
UBE2V1P8	0	NA	NA	NA	NA	NA
CTPS1	1596.61	-0.430126	0.151208	-2.84459	0.00444687	0.0244135
SLFNL1-AS1	10.3873	-0.14757	0.663518	-0.222406	0.823998	0.913707
SLFNL1	7.24395	0.360573	0.736577	0.489525	0.62447	0.794883
SCMH1	156.809	0.616393	0.222048	2.77594	0.00550425	0.0288214
RPL23AP17	0	NA	NA	NA	NA	NA
ENSG00000287400	0	NA	NA	NA	NA	NA
SCMH1-DT	0	NA	NA	NA	NA	NA
ENSG00000213987	0	NA	NA	NA	NA	NA
ENSG00000286640	8.93015	1.20934	0.82334	1.46882	0.141882	0.316963
FOXO6	468.538	0.85851	0.205123	4.18534	2.84738e-05	0.00042045
FOXO6-AS1	0.334368	0.991577	4.03209	0.245921	0.805743	NA
RNA5SP45	0	NA	NA	NA	NA	NA
EDN2	0.218175	0.0291586	4.08052	0.00714579	0.994299	NA
HIVEP3	31.1104	0.522059	0.348031	1.50004	0.133605	0.303967
ENSG00000230881	0	NA	NA	NA	NA	NA
ENSG00000230638	0	NA	NA	NA	NA	NA
ENSG00000284895	0	NA	NA	NA	NA	NA
ENSG00000287587	0	NA	NA	NA	NA	NA
HNRNPFP1	0	NA	NA	NA	NA	NA
ENSG00000228776	0	NA	NA	NA	NA	NA
GUCA2B	0	NA	NA	NA	NA	NA
GUCA2A	0.239074	0.990947	4.08052	0.242848	0.808123	NA
FOXJ3	1891.71	0.416593	0.166997	2.49461	0.0126097	0.0537219
ENSG00000227527	0.33611	2.49305	3.99342	0.624289	0.532438	NA
RIMKLA	206.384	1.97247	0.367089	5.37327	7.7322e-08	2.53273e-06
ENSG00000235002	0	NA	NA	NA	NA	NA
ZMYND12	8.47534	-0.0364834	0.745139	-0.0489619	0.96095	0.982609
PPCS	1084.06	0.159775	0.104251	1.53259	0.125377	0.290402
CCDC30	22.6006	1.00564	0.44751	2.2472	0.0246273	0.0883247
RPS3AP11	0	NA	NA	NA	NA	NA
TMSB4XP1	0	NA	NA	NA	NA	NA
RNU6-536P	0	NA	NA	NA	NA	NA
ENSG00000236180	0	NA	NA	NA	NA	NA
PPIH	882.452	-0.105509	0.113881	-0.926478	0.354198	0.579144
ENSG00000285728	36.2933	-0.0944798	0.385358	-0.245174	0.806322	0.903824
ENSG00000234917	0.888059	2.74715	2.47882	1.10825	0.267754	NA
YBX1	15935	-0.400027	0.128189	-3.1206	0.00180486	0.0120632
CLDN19	233.167	2.23721	0.376157	5.94754	2.72197e-09	1.35381e-07
P3H1	840.184	0.13286	0.147145	0.902918	0.366569	0.590663
C1orf50	268.264	0.239534	0.1426	1.67977	0.0930028	0.235003
ENSG00000283580	0.647285	3.44228	3.87129	0.889181	0.373906	NA
ENSG00000228452	0	NA	NA	NA	NA	NA
TMEM269	3.01063	0.0395767	1.09574	0.0361186	0.971188	0.987341
SVBP	246.268	0.232206	0.143483	1.61835	0.105588	0.257581
ERMAP	151.91	0.219478	0.208272	1.05381	0.291972	0.512719
ZNF691-DT	22.7276	-0.283986	0.442636	-0.64158	0.521146	0.723129
ZNF691	107.199	-0.314636	0.194183	-1.6203	0.105167	0.256912
ENSG00000233708	0	NA	NA	NA	NA	NA
MKRN8P	0	NA	NA	NA	NA	NA
ATP6V1E1P1	0	NA	NA	NA	NA	NA
ENSG00000288955	6.42754	1.57295	0.983154	1.59991	0.109619	0.264488
SLC2A1	29019.6	0.55742	0.168051	3.31697	0.000909985	0.00703196
ATP6V0CP4	0	NA	NA	NA	NA	NA
SLC2A1-DT	31.9994	0.820912	0.374483	2.19212	0.0283707	0.098537
ENSG00000283973	2.56291	1.78626	1.36325	1.3103	0.190094	NA
RNU6-880P	0	NA	NA	NA	NA	NA
U6_2	0	NA	NA	NA	NA	NA
ENSG00000277513	0	NA	NA	NA	NA	NA
FAM183A	4.61911	0.0679922	1.22678	0.0554233	0.955801	0.980027
EBNA1BP2	2149.32	-0.297806	0.11593	-2.56884	0.010204	0.0460309
MIR6733	0	NA	NA	NA	NA	NA
CFAP57	14.8694	0.333952	0.525869	0.635048	0.525397	0.726388
RNA5SP46	0	NA	NA	NA	NA	NA
TMEM125	119.313	0.874107	0.263045	3.32303	0.000890465	0.00693299
C1orf210	163.453	0.0268715	0.174797	0.153729	0.877823	0.941199
TIE1	0.414994	-0.831773	3.22409	-0.257986	0.796417	NA
MPL	2.79852	-0.860418	1.1675	-0.736977	0.461136	0.675597
ENSG00000287113	0.114941	-0.93263	4.08052	-0.228556	0.819214	NA
CDC20-DT	4.65427	-1.67422	1.13781	-1.47144	0.141172	0.315902
CDC20	1857.67	-0.773652	0.182337	-4.24298	2.2057e-05	0.000343615
ELOVL1	1555.97	-0.00350804	0.104627	-0.0335291	0.973253	0.988282
MIR6734	0	NA	NA	NA	NA	NA
ENSG00000288772	0.32444	-2.41493	3.99461	-0.604548	0.545479	NA
MED8	674.66	0.11486	0.107775	1.06574	0.286542	0.507216
MED8-AS1	1.63725	-0.206964	1.52861	-0.135393	0.892301	NA
SZT2	616.341	-0.00867115	0.129949	-0.0667273	0.946799	0.975274
SZT2-AS1	0	NA	NA	NA	NA	NA
MIR6735	0	NA	NA	NA	NA	NA
HYI	53.0716	-0.370238	0.446319	-0.829536	0.406801	0.627445
HYI-AS1	0	NA	NA	NA	NA	NA
PTPRF	6080.97	0.51337	0.152878	3.35804	0.00078498	0.00624083
KDM4A	876.083	0.231456	0.113651	2.03655	0.0416955	0.130723
ENSG00000284989	1.02373	0	4.08052	0	1	NA
KDM4A-AS1	16.2549	-0.362913	0.586031	-0.619273	0.535736	0.734698
ST3GAL3	47.3494	-0.658507	0.337813	-1.94932	0.0512571	0.152014
ST3GAL3-AS1	0	NA	NA	NA	NA	NA
U6_3	0	NA	NA	NA	NA	NA
ENSG00000233674	0	NA	NA	NA	NA	NA
MIR6079	0	NA	NA	NA	NA	NA
SHMT1P1	0	NA	NA	NA	NA	NA
ARTN	1.10924	2.26896	1.93509	1.17253	0.240983	NA
LINC02918	2.10885	0.209707	1.22572	0.171089	0.864154	NA
ENSG00000288573	0.636388	2.83377	2.84609	0.995672	0.31941	NA
IPO13	409.678	0.0528556	0.156794	0.337103	0.736039	0.863242
ENSG00000285649	1.86484	0.503329	1.43885	0.349813	0.726479	NA
DPH2	535.826	-0.594939	0.159962	-3.71926	0.00019981	0.00207087
ATP6V0B	1406.02	-0.10382	0.118125	-0.878899	0.379456	0.60367
B4GALT2	394.319	-0.299051	0.200958	-1.48812	0.136719	0.308897
CCDC24	90.3447	0.139074	0.24281	0.572769	0.566801	0.755606
SLC6A9	159.225	-1.11639	0.284548	-3.92337	8.73194e-05	0.00105729
ENSG00000230615	12.2262	-0.387267	0.639623	-0.60546	0.544873	0.741225
ENSG00000227163	0	NA	NA	NA	NA	NA
KRT8P47	0	NA	NA	NA	NA	NA
RN7SL479P	0	NA	NA	NA	NA	NA
KLF17	0.955073	-0.8149	2.44876	-0.33278	0.7393	NA
ENSG00000233514	0	NA	NA	NA	NA	NA
KLF18	0	NA	NA	NA	NA	NA
ENSG00000226804	0	NA	NA	NA	NA	NA
Y_RNA_21	0	NA	NA	NA	NA	NA
OOSP1P1	0	NA	NA	NA	NA	NA
ENSG00000227994	0	NA	NA	NA	NA	NA
ENSG00000271329	0	NA	NA	NA	NA	NA
DMAP1	695.701	-0.100341	0.156048	-0.643017	0.520213	0.722528
ERI3	775.165	-0.290975	0.121967	-2.38569	0.0170473	0.067213
ERI3-IT1	0.344026	0.990947	4.05622	0.244303	0.806996	NA
RNU6-369P	0	NA	NA	NA	NA	NA
RNF220	1032.94	-0.154691	0.114836	-1.34707	0.177959	0.370373
MIR5584	0	NA	NA	NA	NA	NA
TMEM53	98.2561	-0.321659	0.262425	-1.22572	0.220306	0.427299
ARMH1	1.11831	1.97243	2.37297	0.831208	0.405856	NA
RNU5F-1	0.232385	1.95337	4.03209	0.484455	0.628063	NA
RNU5D-1	0.889979	0.658545	2.01378	0.32702	0.743653	NA
KIF2C	1088.9	-0.522171	0.117434	-4.44649	8.72844e-06	0.000157985
ENSG00000225721	4.46413	0.683625	0.999117	0.684229	0.49383	0.702494
RPS8	39086.4	0.0817078	0.104066	0.785156	0.432362	0.651196
SNORD55	0	NA	NA	NA	NA	NA
SNORD46	0	NA	NA	NA	NA	NA
SNORD38A	0	NA	NA	NA	NA	NA
SNORD38B_1	0	NA	NA	NA	NA	NA
SNORD38B_2	0	NA	NA	NA	NA	NA
RPS15AP11	0	NA	NA	NA	NA	NA
BEST4	5.11119	1.30357	0.981532	1.32809	0.184147	0.378491
PLK3	202.729	0.493716	0.2502	1.97329	0.048463	0.146096
DYNLT4	2.13085	-0.386061	1.62824	-0.237104	0.812576	NA
BTBD19	15.6201	0.327422	0.491093	0.666721	0.50495	0.71111
PTCH2	6.54199	-0.0306909	0.772029	-0.0397536	0.96829	0.986094
RNU5E-6P	0.101982	-0.93263	4.08052	-0.228556	0.819214	NA
ENSG00000226499	0	NA	NA	NA	NA	NA
EIF2B3	458.563	-0.579073	0.167114	-3.46514	0.000529952	0.0045123
RNA5SP47	0	NA	NA	NA	NA	NA
CCNB1IP1P1	0	NA	NA	NA	NA	NA
PPIAP35	0	NA	NA	NA	NA	NA
MRPS17P1	0	NA	NA	NA	NA	NA
HECTD3	837.712	0.318413	0.106524	2.98913	0.00279773	0.0170673
UROD	526.396	-0.322961	0.132659	-2.43452	0.0149114	0.0609404
ZSWIM5	37.3478	0.284141	0.308513	0.921002	0.357049	0.581567
OSTCP5	0	NA	NA	NA	NA	NA
LINC01144	4.98812	-0.95339	0.919964	-1.03633	0.300046	0.521195
HPDL	222.597	-1.39622	0.368168	-3.79234	0.000149235	0.00163757
MUTYH	273.307	-0.564849	0.220392	-2.56292	0.0103796	0.0465861
ENSG00000288208	2.49781	-0.0636403	2.39285	-0.026596	0.978782	NA
TOE1	412.033	-0.625046	0.169941	-3.67802	0.000235051	0.00234877
TESK2	253.347	-0.0558098	0.185803	-0.30037	0.763895	0.879774
PPIAP36	0	NA	NA	NA	NA	NA
CCDC163	29.5381	-0.748635	0.428946	-1.74529	0.0809342	0.212306
MMACHC	249.868	-0.621024	0.218369	-2.84391	0.00445633	0.0244499
PRDX1	11341.4	0.0788123	0.0949498	0.830042	0.406515	0.627279
HMGB1P48	0	NA	NA	NA	NA	NA
AKR1A1	1146.31	0.123614	0.0912955	1.354	0.175737	0.367419
ENSG00000281133	0	NA	NA	NA	NA	NA
ENSG00000280836	0	NA	NA	NA	NA	NA
ENSG00000289407	2.63481	0.201886	1.23228	0.163831	0.869864	NA
NASP	11036.2	-0.435192	0.0879659	-4.94728	7.52586e-07	1.91901e-05
ENSG00000281112	0	NA	NA	NA	NA	NA
ENSG00000281825	0	NA	NA	NA	NA	NA
CCDC17	8.25805	-0.396534	0.681295	-0.58203	0.560547	0.751835
GPBP1L1	3031.88	0.0713176	0.103636	0.688156	0.491355	0.70077
RPS15AP10	0	NA	NA	NA	NA	NA
ENSG00000234329	0	NA	NA	NA	NA	NA
TMEM69	1400.65	-0.123493	0.084293	-1.46504	0.14291	0.318329
IPP	411.598	-0.147915	0.141822	-1.04297	0.296964	0.518167
ENSG00000230896	13.7046	0.468081	0.542444	0.862911	0.388186	0.611575
ENSG00000236111	0	NA	NA	NA	NA	NA
MAST2	1658.2	-0.153649	0.0869442	-1.76721	0.0771935	0.204943
TMA16P2	0	NA	NA	NA	NA	NA
PIK3R3	730.35	0.896389	0.244783	3.66198	0.000250278	0.00247139
P3R3URF-PIK3R3	4.8325	-4.8553	3.92313	-1.23761	0.215862	0.421661
ENSG00000226957	0.314649	0.990947	4.08052	0.242848	0.808123	NA
ENSG00000233114	0	NA	NA	NA	NA	NA
ENSG00000227857	0.226049	0.0291586	4.08052	0.00714579	0.994299	NA
TSPAN1	4.14395	1.26238	1.10479	1.14265	0.253185	0.469197
P3R3URF	0	NA	NA	NA	NA	NA
POMGNT1	1104.13	0.0108169	0.104378	0.103632	0.917462	0.959761
LURAP1	76.2655	0.568731	0.368668	1.54267	0.122912	0.286645
RAD54L	614.786	-0.727214	0.132407	-5.49228	3.96779e-08	1.40166e-06
LRRC41	960.914	-0.0474131	0.124884	-0.379657	0.7042	0.843762
UQCRH	4256.22	-0.170681	0.102166	-1.67063	0.0947952	0.237998
NSUN4	1038.25	-0.0423717	0.0954693	-0.443825	0.657169	0.816092
ENSG00000225779	0	NA	NA	NA	NA	NA
FAAH	180.55	0.143849	0.205311	0.700642	0.483527	0.694625
FAAHP1	1.38789	2.01232	1.93365	1.04068	0.298024	NA
LINC01398	0.229737	0	4.08052	0	1	NA
DMBX1	1.83875	2.51214	1.80889	1.38877	0.164901	NA
TMEM275	0	NA	NA	NA	NA	NA
MKNK1-AS1	3.38387	0.483021	1.18187	0.408693	0.682765	0.832424
KNCN	0	NA	NA	NA	NA	NA
MKNK1	716.928	-0.107976	0.126411	-0.854164	0.393014	0.615535
MOB3C	51.9736	0.390107	0.294928	1.32272	0.185929	0.380505
ATPAF1	1618.15	-0.124712	0.0954983	-1.30591	0.191584	0.388635
NENFP1	0	NA	NA	NA	NA	NA
TEX38	0.557075	1.92845	2.85913	0.674489	0.500001	NA
EFCAB14-AS1	0	NA	NA	NA	NA	NA
EFCAB14	3415.31	0.0927236	0.0890857	1.04084	0.297952	0.519117
ENSG00000236476	0	NA	NA	NA	NA	NA
CYP4B1	3.57262	-0.712147	1.24114	-0.573783	0.566114	0.755209
CYP4Z2P	0	NA	NA	NA	NA	NA
TUBAP8	0	NA	NA	NA	NA	NA
CYP4A11	0	NA	NA	NA	NA	NA
CYP4A26P	0	NA	NA	NA	NA	NA
CYP4A43P	0	NA	NA	NA	NA	NA
CYP4A27P	0	NA	NA	NA	NA	NA
CYP4A44P	0	NA	NA	NA	NA	NA
CYP4X1	0.103725	0.990947	4.08052	0.242848	0.808123	NA
CYP4Z1	0.101771	0	4.08052	0	1	NA
TUBAP9	0	NA	NA	NA	NA	NA
CYP4A22-AS1	0	NA	NA	NA	NA	NA
CYP4A22	0	NA	NA	NA	NA	NA
MTND1P34	0	NA	NA	NA	NA	NA
LINC00853	0.103725	0.990947	4.08052	0.242848	0.808123	NA
PDZK1IP1	0.525491	1.43284	3.57616	0.400664	0.688668	NA
TAL1	0.20745	1.81104	4.04485	0.447739	0.654342	NA
ENSG00000226252	0	NA	NA	NA	NA	NA
STIL	773.276	-0.55929	0.109226	-5.1205	3.04723e-07	8.62907e-06
CMPK1	3794.98	-0.0920544	0.0919606	-1.00102	0.316817	0.539982
LINC01389	0	NA	NA	NA	NA	NA
FOXE3	1.23978	0.0229263	1.82321	0.0125747	0.989967	NA
FOXD2-AS1	12.6349	1.40077	0.81489	1.71897	0.0856201	0.221259
FOXD2	4.15331	2.43761	1.1693	2.08467	0.037099	0.120259
ENSG00000271355	0	NA	NA	NA	NA	NA
RPL21P24	0	NA	NA	NA	NA	NA
ATP6V0E1P4	0	NA	NA	NA	NA	NA
LINC01738	0.103725	0.990947	4.08052	0.242848	0.808123	NA
TRABD2B	0	NA	NA	NA	NA	NA
ENSG00000223814	0	NA	NA	NA	NA	NA
ENSG00000225028	0	NA	NA	NA	NA	NA
LINC02794	0	NA	NA	NA	NA	NA
ENSG00000231413	0	NA	NA	NA	NA	NA
CYP46A4P	0	NA	NA	NA	NA	NA
SKINT1L	0	NA	NA	NA	NA	NA
ENSG00000279096	0	NA	NA	NA	NA	NA
ENSG00000223720	0	NA	NA	NA	NA	NA
SLC5A9	0	NA	NA	NA	NA	NA
ENSG00000272491	0	NA	NA	NA	NA	NA
ENSG00000279214	0	NA	NA	NA	NA	NA
SPATA6	60.735	-1.98756	0.559912	-3.54978	0.00038556	0.00350196
PPP1R8P1	0	NA	NA	NA	NA	NA
RNU6-723P	0	NA	NA	NA	NA	NA
ENSG00000235105	0	NA	NA	NA	NA	NA
RNU4-61P	0	NA	NA	NA	NA	NA
ENSG00000232514	0	NA	NA	NA	NA	NA
AGBL4	1.76456	0.988224	1.50004	0.6588	0.510024	NA
ENSG00000287661	0	NA	NA	NA	NA	NA
BEND5	1.22164	1.30065	2.25734	0.576189	0.564488	NA
ENSG00000286597	0	NA	NA	NA	NA	NA
ENSG00000229846	0	NA	NA	NA	NA	NA
AGBL4-AS1	0	NA	NA	NA	NA	NA
AGBL4-IT1	0	NA	NA	NA	NA	NA
ENSG00000237478	0	NA	NA	NA	NA	NA
ZNF859P	0	NA	NA	NA	NA	NA
ENSG00000279324	0	NA	NA	NA	NA	NA
MTND2P29	0	NA	NA	NA	NA	NA
ELAVL4	0.127966	0	4.08052	0	1	NA
ENSG00000230828	0	NA	NA	NA	NA	NA
ELAVL4-AS1	0	NA	NA	NA	NA	NA
ENSG00000233407	0	NA	NA	NA	NA	NA
LINC02808	0	NA	NA	NA	NA	NA
ENSG00000284645	0	NA	NA	NA	NA	NA
ENSG00000234080	0	NA	NA	NA	NA	NA
HMGB1P45	0	NA	NA	NA	NA	NA
FCF1P6	0	NA	NA	NA	NA	NA
DMRTA2	1.1044	0.980477	1.85344	0.529005	0.596802	NA
ENSG00000284700	0	NA	NA	NA	NA	NA
FAF1	1549.55	-0.342253	0.0922912	-3.70841	0.000208568	0.00214186
FAF1-AS1	0	NA	NA	NA	NA	NA
RNU6-1026P	0	NA	NA	NA	NA	NA
PHBP12	0	NA	NA	NA	NA	NA
MRPS6P2	0	NA	NA	NA	NA	NA
CDKN2C	28.4666	0.176469	0.37381	0.472082	0.636868	0.803169
MIR4421	0	NA	NA	NA	NA	NA
MIR6500	0	NA	NA	NA	NA	NA
C1orf185	0	NA	NA	NA	NA	NA
Y_RNA_22	0	NA	NA	NA	NA	NA
CFL1P2	0	NA	NA	NA	NA	NA
LINC01562	0.227301	1.92542	4.0345	0.47724	0.633191	NA
RNF11	4000.3	0.693441	0.200369	3.46082	0.000538525	0.00456537
ENSG00000233406	0	NA	NA	NA	NA	NA
ENSG00000236434	0	NA	NA	NA	NA	NA
TTC39A	266.777	0.187288	0.262571	0.713285	0.47567	0.688097
TTC39A-AS1	0	NA	NA	NA	NA	NA
EPS15	2882.94	0.314983	0.122218	2.57723	0.00995958	0.0452069
ENSG00000232027	0	NA	NA	NA	NA	NA
RNU6-877P	0	NA	NA	NA	NA	NA
ENSG00000238140	0.89165	3.90173	2.83209	1.37768	0.168301	NA
EPS15-AS1	0	NA	NA	NA	NA	NA
RNU6-1281P	0	NA	NA	NA	NA	NA
CALR4P	1.31966	-1.84885	2.10946	-0.876454	0.380783	NA
OSBPL9	3699.4	0.180544	0.0991243	1.82139	0.0685479	0.188164
GAPDHP51	0	NA	NA	NA	NA	NA
SLC25A6P3	0	NA	NA	NA	NA	NA
ENSG00000212624	0	NA	NA	NA	NA	NA
NRDC	5838.64	-0.105472	0.104972	-1.00476	0.315012	0.537887
ENSG00000266993	12.9464	0.423082	0.594326	0.711869	0.476546	0.688661
ENSG00000272175	0.985061	-0.581425	2.15854	-0.26936	0.787652	NA
MIR761	0	NA	NA	NA	NA	NA
TSEN15P2	0	NA	NA	NA	NA	NA
RAB3B	1224.56	-0.107034	0.180257	-0.593783	0.552657	0.746557
RNA5SP48	0	NA	NA	NA	NA	NA
ENSG00000229032	0	NA	NA	NA	NA	NA
RN7SL290P	0	NA	NA	NA	NA	NA
TXNDC12	1044.44	0.0447167	0.116964	0.382311	0.702231	0.842817
ENSG00000285839	3.87173	0.0160359	3.78332	0.00423857	0.996618	0.998722
KTI12	367.577	-0.216855	0.131295	-1.65166	0.0986041	0.245211
ENSG00000223390	0.791776	2.3972	3.22079	0.744289	0.456701	NA
TXNDC12-AS1	0.209499	-1.79014	4.04139	-0.442951	0.657801	NA
BTF3L4	2719.28	-0.153969	0.103169	-1.49239	0.135596	0.307231
ZFYVE9	684.13	-0.246951	0.131296	-1.88087	0.0599891	0.170619
RN7SL788P	0	NA	NA	NA	NA	NA
ENSG00000228407	0	NA	NA	NA	NA	NA
ENSG00000223429	0	NA	NA	NA	NA	NA
PDCL3P6	0	NA	NA	NA	NA	NA
ENSG00000236004	0	NA	NA	NA	NA	NA
DNAJC19P7	0	NA	NA	NA	NA	NA
ANAPC10P1	0	NA	NA	NA	NA	NA
CC2D1B	993.991	-0.157602	0.116069	-1.35783	0.174517	0.36571
ENSG00000272100	2.17844	0.717246	1.53521	0.467198	0.640358	NA
ENSG00000287078	0.982391	2.72686	2.19496	1.24232	0.214117	NA
PLA2G12AP1	0	NA	NA	NA	NA	NA
ORC1	821.914	-0.777078	0.103349	-7.51893	5.52256e-14	8.07997e-12
PRPF38A	1711.39	-0.101487	0.0944143	-1.07491	0.282417	0.50281
TUT4	1530.69	-0.174687	0.100402	-1.73987	0.0818812	0.214086
ENSG00000272371	0	NA	NA	NA	NA	NA
EEF1GP7	0	NA	NA	NA	NA	NA
GPX7	116.095	1.06723	0.224875	4.74589	2.07592e-06	4.60769e-05
SHISAL2A	0.323643	2.44346	3.99641	0.611414	0.540925	NA
COA7	1921.56	-0.396534	0.115427	-3.43538	0.000591715	0.00493761
NDUFS5P3	0	NA	NA	NA	NA	NA
RN7SL62P	0	NA	NA	NA	NA	NA
ZYG11B	3543.37	0.191514	0.122037	1.56931	0.116575	0.27647
RNU2-30P	0	NA	NA	NA	NA	NA
RPS13P2	0	NA	NA	NA	NA	NA
RNU6-969P	0	NA	NA	NA	NA	NA
ZYG11A	153.979	-0.65104	0.213209	-3.05352	0.00226171	0.0144293
ENSG00000242391	0.229882	-1.9069	4.03109	-0.473048	0.636179	NA
ECHDC2	626.943	0.167263	0.180815	0.925052	0.354939	0.579491
ENSG00000230953	0	NA	NA	NA	NA	NA
ENSG00000231866	0	NA	NA	NA	NA	NA
SCP2	2651.07	0.315822	0.101613	3.1081	0.00188293	0.0124749
ENSG00000264834	0	NA	NA	NA	NA	NA
ENSG00000266188	0	NA	NA	NA	NA	NA
ENSG00000265815	0	NA	NA	NA	NA	NA
H3P2	0	NA	NA	NA	NA	NA
RRAS2P1	0	NA	NA	NA	NA	NA
TUBBP10	0	NA	NA	NA	NA	NA
PODN	1.23726	1.25205	2.06245	0.607066	0.543807	NA
ENSG00000232993	0.101771	0	4.08052	0	1	NA
HIGD1AP11	0	NA	NA	NA	NA	NA
SLC1A7	1.06542	0.625297	2.10011	0.297745	0.765898	NA
ENSG00000235563	0	NA	NA	NA	NA	NA
ENSG00000277397	0	NA	NA	NA	NA	NA
CPT2	1018.52	-0.186578	0.133558	-1.39699	0.162418	0.348262
ENSG00000236723	1.41574	0.0147618	1.96531	0.00751116	0.994007	NA
CZIB	741.176	-0.244584	0.133146	-1.83697	0.066215	0.183308
CZIB-DT	0.635044	0.934782	3.48363	0.268336	0.788441	NA
MAGOH	1350.46	-0.417495	0.11131	-3.75075	0.000176304	0.00188512
MAGOH-DT	12.9709	-0.155409	0.720681	-0.215642	0.829267	0.916207
LRP8	1179.98	-0.277319	0.107435	-2.58128	0.00984351	0.0448307
ENSG00000234578	0	NA	NA	NA	NA	NA
ENSG00000228838	0.311269	-1.79014	4.04139	-0.442951	0.657801	NA
ENSG00000232762	0.101982	-0.93263	4.08052	-0.228556	0.819214	NA
LRP8-DT	0.900584	0.612633	2.01403	0.304183	0.760989	NA
ENSG00000285954	0	NA	NA	NA	NA	NA
ENSG00000226938	0	NA	NA	NA	NA	NA
LINC02812	1.29122	3.08695	2.02535	1.52415	0.12747	NA
SLC25A3P1	0	NA	NA	NA	NA	NA
ENSG00000288527	0	NA	NA	NA	NA	NA
DMRTB1	0	NA	NA	NA	NA	NA
GLIS1	0.444432	2.89771	3.97241	0.729458	0.465722	NA
RNU7-95P	0	NA	NA	NA	NA	NA
NDC1	3701.04	-0.486128	0.0983663	-4.94201	7.73209e-07	1.95891e-05
ENSG00000201003	0	NA	NA	NA	NA	NA
ENSG00000229687	0	NA	NA	NA	NA	NA
YIPF1	701.192	0.204294	0.140893	1.45	0.14706	0.324975
DIO1	32.4243	1.14447	0.428686	2.66972	0.0075914	0.0369305
HSPB11	502.424	-0.23522	0.121635	-1.93382	0.0531353	0.15595
LRRC42	701.073	0.00866023	0.115077	0.075256	0.940011	0.97161
HNRNPA3P12	0	NA	NA	NA	NA	NA
LDLRAD1	0.111108	0.990947	4.08052	0.242848	0.808123	NA
TMEM59	3472.95	0.704851	0.157649	4.47103	7.78439e-06	0.000143697
ENSG00000280378	0	NA	NA	NA	NA	NA
TCEANC2	311.986	0.114005	0.134291	0.848941	0.395914	0.617836
MIR4781	0	NA	NA	NA	NA	NA
ENSG00000225183	0	NA	NA	NA	NA	NA
ENSG00000279049	0	NA	NA	NA	NA	NA
ENSG00000256407	0.879202	0.0062316	2.8441	0.00219106	0.998252	NA
CDCP2	0	NA	NA	NA	NA	NA
ENSG00000280425	0	NA	NA	NA	NA	NA
CYB5RL	114.203	-0.285307	0.206741	-1.38002	0.167579	0.355508
MRPL37	1943.78	-0.327203	0.116991	-2.79682	0.00516082	0.0274488
SSBP3	3159.34	0.0898701	0.162611	0.552671	0.580489	0.764444
SSBP3-AS1	11.1228	0.0373977	0.625746	0.059765	0.952343	0.978424
ENSG00000225632	0	NA	NA	NA	NA	NA
ENSG00000232245	0	NA	NA	NA	NA	NA
ENSG00000287582	0.631215	-1.40516	2.89632	-0.485153	0.627568	NA
LINC02784	0.111108	0.990947	4.08052	0.242848	0.808123	NA
ENSG00000237173	0	NA	NA	NA	NA	NA
HNRNPA1P63	0	NA	NA	NA	NA	NA
ACOT11	116.898	2.86146	0.290343	9.85546	6.49213e-23	3.79941e-20
FAM151A	9.31311	3.37791	0.965579	3.49833	0.000468186	0.00411821
ENSG00000230728	0	NA	NA	NA	NA	NA
MROH7	0.111108	0.990947	4.08052	0.242848	0.808123	NA
MROH7-TTC4	1.15186	-0.694359	2.18322	-0.318043	0.750452	NA
TTC4	648.821	-0.349258	0.131328	-2.65944	0.00782716	0.0377428
PARS2	207.636	0.010142	0.15679	0.0646852	0.948425	0.976226
TTC22	13.4037	2.19099	0.617977	3.54543	0.000391969	0.00355098
ENSG00000237453	0	NA	NA	NA	NA	NA
LEXM	0.116193	0.990947	4.08052	0.242848	0.808123	NA
DHCR24	5912.98	0.0565995	0.131473	0.430501	0.666831	0.822067
ENSG00000287724	0	NA	NA	NA	NA	NA
ENSG00000242396	3.4778	0.492014	1.15638	0.42548	0.670487	0.824583
DHCR24-DT	0.962664	-0.989484	1.92774	-0.513286	0.607751	NA
ENSG00000284601	0.116193	0.990947	4.08052	0.242848	0.808123	NA
TMEM61	0.547247	1.55583	2.97584	0.52282	0.601099	NA
ENSG00000233271	0.215032	-1.8229	4.03842	-0.45139	0.651709	NA
BSND	5.29376	0.631898	0.941176	0.671392	0.501971	0.708791
PCSK9	1.29084	1.01927	1.67082	0.610042	0.541834	NA
USP24	1458.42	0.194045	0.099464	1.9509	0.0510684	0.151608
MIR4422HG	0	NA	NA	NA	NA	NA
GYG1P3	0	NA	NA	NA	NA	NA
MIR4422	0	NA	NA	NA	NA	NA
ENSG00000234810	0	NA	NA	NA	NA	NA
GOT2P1	0	NA	NA	NA	NA	NA
MTCO2P34	0	NA	NA	NA	NA	NA
RN7SKP291	0	NA	NA	NA	NA	NA
RNU6-830P	0	NA	NA	NA	NA	NA
Y_RNA_23	0	NA	NA	NA	NA	NA
LINC01755	0	NA	NA	NA	NA	NA
LINC01753	0	NA	NA	NA	NA	NA
PIGQP1	0	NA	NA	NA	NA	NA
ENSG00000235612	0	NA	NA	NA	NA	NA
ENSG00000260971	1.17978	2.49006	1.98796	1.25257	0.210362	NA
ENSG00000284686	7.35057	-0.228197	0.785473	-0.290522	0.771417	0.884116
RPSAP20	0	NA	NA	NA	NA	NA
LINC01767	0.968865	0.931349	2.39629	0.388663	0.697525	NA
PLPP3	2133.82	0.886629	0.194522	4.55799	5.16451e-06	0.000100191
RPL21P23	0	NA	NA	NA	NA	NA
RPL23AP85	0	NA	NA	NA	NA	NA
ENSG00000225475	0	NA	NA	NA	NA	NA
PRKAA2	650.345	0.565212	0.169679	3.33107	0.000865132	0.00677179
FYB2	6.82322	0.442347	0.828784	0.53373	0.593529	0.773786
ENSG00000229913	0	NA	NA	NA	NA	NA
C8A	0	NA	NA	NA	NA	NA
C8B	0.107516	-0.93263	4.08052	-0.228556	0.819214	NA
ENSG00000236341	0	NA	NA	NA	NA	NA
DAB1	17.4906	0.137809	0.614	0.224444	0.822412	0.913057
ENSG00000227935	0	NA	NA	NA	NA	NA
RPS20P5	0	NA	NA	NA	NA	NA
DAB1-AS1	0	NA	NA	NA	NA	NA
HNRNPA1P6	0.62778	-3.0889	3.3151	-0.931769	0.351456	NA
RPS26P15	0	NA	NA	NA	NA	NA
ENSG00000235038	0	NA	NA	NA	NA	NA
ENSG00000230546	0	NA	NA	NA	NA	NA
ENSG00000233216	0	NA	NA	NA	NA	NA
OMA1	443.89	-0.352823	0.140194	-2.51667	0.0118468	0.0513694
ENSG00000286918	0	NA	NA	NA	NA	NA
ENSG00000270209	0	NA	NA	NA	NA	NA
RN7SL713P	0	NA	NA	NA	NA	NA
TACSTD2	1287.36	2.77992	0.588241	4.72581	2.292e-06	4.99264e-05
ENSG00000185839	0	NA	NA	NA	NA	NA
MYSM1	1125.44	0.14348	0.0894148	1.60465	0.10857	0.262485
ENSG00000283445	0.116193	0.990947	4.08052	0.242848	0.808123	NA
JUN	174.718	0.753714	0.30775	2.44912	0.0143207	0.0591268
LINC01135	38.7471	0.306171	0.434606	0.704479	0.481134	0.692698
ENSG00000272226	0.103725	0.990947	4.08052	0.242848	0.808123	NA
ENSG00000231740	0	NA	NA	NA	NA	NA
LINC02777	0.111108	0.990947	4.08052	0.242848	0.808123	NA
LINC01358	0	NA	NA	NA	NA	NA
PHBP3	0	NA	NA	NA	NA	NA
ENSG00000241042	0	NA	NA	NA	NA	NA
ENSG00000235215	0	NA	NA	NA	NA	NA
FGGY-DT	0.927756	0.576238	2.78067	0.20723	0.83583	NA
ENSG00000270457	0	NA	NA	NA	NA	NA
FGGY	43.4049	0.568862	0.364937	1.5588	0.119045	0.280433
MIR4711	0	NA	NA	NA	NA	NA
ENSG00000226883	0	NA	NA	NA	NA	NA
HOOK1	1968.81	0.654166	0.163683	3.99654	6.42752e-05	0.000821471
CYP2J2	2530.39	1.1028	0.225538	4.88966	1.01009e-06	2.46993e-05
RN7SL475P	0	NA	NA	NA	NA	NA
C1orf87	0	NA	NA	NA	NA	NA
PGBD4P8	0	NA	NA	NA	NA	NA
LINC02778	0	NA	NA	NA	NA	NA
LINC01748	2.74712	0.208913	1.20763	0.172995	0.862656	0.934455
ENSG00000231252	0.114941	-0.93263	4.08052	-0.228556	0.819214	NA
NFIA	38.243	0.961445	0.348682	2.75737	0.00582677	0.0301239
NFIA-AS2	0	NA	NA	NA	NA	NA
NFIA-AS1	0	NA	NA	NA	NA	NA
ENSG00000284808	0	NA	NA	NA	NA	NA
ENSG00000287224	0	NA	NA	NA	NA	NA
ENSG00000223920	0	NA	NA	NA	NA	NA
TM2D1	319.154	0.41973	0.146739	2.86038	0.00423138	0.0234428
PATJ-DT	0.472789	-2.49532	3.9899	-0.625409	0.531703	NA
PATJ	1127.24	1.7165	0.185575	9.24965	2.25238e-20	9.41547e-18
RNU6-414P	0	NA	NA	NA	NA	NA
RNU6-1177P	0	NA	NA	NA	NA	NA
LAMTOR5P1	0	NA	NA	NA	NA	NA
RN7SL180P	0	NA	NA	NA	NA	NA
MIR3116-1	0	NA	NA	NA	NA	NA
MIR3116-2	0	NA	NA	NA	NA	NA
PIGPP2	0	NA	NA	NA	NA	NA
RPS15AP7	0	NA	NA	NA	NA	NA
L1TD1	0.111108	0.990947	4.08052	0.242848	0.808123	NA
ENSG00000237227	0	NA	NA	NA	NA	NA
Y_RNA_24	0	NA	NA	NA	NA	NA
KANK4	908.715	0.386993	0.257368	1.50365	0.132671	0.302349
RNU6-371P	0	NA	NA	NA	NA	NA
USP1	2033.14	-0.60703	0.108418	-5.59899	2.15603e-08	8.17567e-07
DOCK7	1240.27	-0.210652	0.0839579	-2.50902	0.0121068	0.0521874
ENSG00000270549	0	NA	NA	NA	NA	NA
ANGPTL3	0.781173	-1.25248	3.08416	-0.406102	0.684668	NA
ENSG00000278967	0	NA	NA	NA	NA	NA
ENSG00000213703	0	NA	NA	NA	NA	NA
DOCK7-DT	1.99317	-0.997273	1.51288	-0.65919	0.509774	NA
ATG4C	935.16	-0.395434	0.123126	-3.21163	0.00131984	0.00938915
ENSG00000234318	0.311175	2.39245	3.9996	0.598173	0.549724	NA
ENSG00000237163	0	NA	NA	NA	NA	NA
LINC01739	0	NA	NA	NA	NA	NA
ENSG00000286455	0	NA	NA	NA	NA	NA
ENSG00000227485	0	NA	NA	NA	NA	NA
ENSG00000229225	0	NA	NA	NA	NA	NA
ENSG00000203605	0	NA	NA	NA	NA	NA
LINC00466	0.342283	-0.93263	4.06277	-0.229555	0.818437	NA
RNA5SP49	0	NA	NA	NA	NA	NA
ENSG00000228734	0	NA	NA	NA	NA	NA
RPSAP65	0	NA	NA	NA	NA	NA
FOXD3-AS1	9.23375	0.882713	0.652054	1.35374	0.175819	0.367482
FOXD3	3.75219	0.0143616	1.05483	0.0136151	0.989137	0.995441
MIR6068	0	NA	NA	NA	NA	NA
Y_RNA_25	0	NA	NA	NA	NA	NA
ENSG00000236674	0	NA	NA	NA	NA	NA
ALG6	802.531	-0.151505	0.118473	-1.27882	0.20096	0.401668
ITGB3BP	551.215	-0.380201	0.139735	-2.72087	0.00651112	0.032821
ENSG00000286429	0.107516	-0.93263	4.08052	-0.228556	0.819214	NA
EFCAB7	86.259	-0.180919	0.281422	-0.642876	0.520305	0.722533
RN7SL488P	0	NA	NA	NA	NA	NA
RNU7-123P	0	NA	NA	NA	NA	NA
DLEU2L	4.46814	-0.110828	1.01987	-0.108669	0.913465	0.957818
ENSG00000276884	0	NA	NA	NA	NA	NA
ENSG00000278287	0	NA	NA	NA	NA	NA
ENSG00000277565	0	NA	NA	NA	NA	NA
ENSG00000275823	0	NA	NA	NA	NA	NA
ENSG00000277689	0	NA	NA	NA	NA	NA
ENSG00000274199	0	NA	NA	NA	NA	NA
PGM1	2920.89	-0.502809	0.13705	-3.66881	0.00024368	0.00241848
RN7SL130P	0	NA	NA	NA	NA	NA
ROR1	47.2935	1.14481	0.379609	3.01577	0.00256331	0.015925
ENSG00000177452	0	NA	NA	NA	NA	NA
CFL1P3	0	NA	NA	NA	NA	NA
RNU6-809P	0	NA	NA	NA	NA	NA
Y_RNA_26	0	NA	NA	NA	NA	NA
ROR1-AS1	0	NA	NA	NA	NA	NA
ENSG00000284928	0	NA	NA	NA	NA	NA
UBE2U	0	NA	NA	NA	NA	NA
RNU7-62P	0	NA	NA	NA	NA	NA
CACHD1	14.6306	2.89043	0.724795	3.98793	6.66521e-05	0.000847979
MIR4794	0	NA	NA	NA	NA	NA
RAVER2	233.603	0.778792	0.154112	5.05342	4.3397e-07	1.17944e-05
JAK1	870.017	0.876851	0.143897	6.09362	1.10384e-09	6.13293e-08
ENSG00000234784	0	NA	NA	NA	NA	NA
ENSG00000233877	0	NA	NA	NA	NA	NA
LINC01359	0	NA	NA	NA	NA	NA
SLC2A3P2	0	NA	NA	NA	NA	NA
ENSG00000272506	0	NA	NA	NA	NA	NA
RNU6-1176P	0	NA	NA	NA	NA	NA
MIR3671	0	NA	NA	NA	NA	NA
MIR101-1	0	NA	NA	NA	NA	NA
ENSG00000288804	0	NA	NA	NA	NA	NA
ENSG00000235804	0	NA	NA	NA	NA	NA
MRPS21P1	0	NA	NA	NA	NA	NA
AK4	2429.52	2.86574	0.246659	11.6182	3.33007e-31	4.17615e-28
RPS29P7	0	NA	NA	NA	NA	NA
DNAJC6	1520.34	-0.218376	0.197848	-1.10376	0.269698	0.488392
ENSG00000229294	0	NA	NA	NA	NA	NA
COX6CP13	0	NA	NA	NA	NA	NA
RNU2-15P	0	NA	NA	NA	NA	NA
LEPROT	3619.78	0.454313	0.126797	3.58298	0.000339693	0.00316392
LEPR	201.775	-0.154931	0.228245	-0.678793	0.497269	0.705157
ENSG00000237852	2.82623	1.02959	1.30089	0.791451	0.428681	0.647985
ENSG00000224570	0	NA	NA	NA	NA	NA
ENSG00000285079	0	NA	NA	NA	NA	NA
RN7SL854P	0	NA	NA	NA	NA	NA
PDE4B	1087.84	-0.176555	0.185917	-0.949643	0.342293	0.567215
PDE4B-AS1	0	NA	NA	NA	NA	NA
RNU4-88P	0	NA	NA	NA	NA	NA
SGIP1	0.750199	1.43922	2.8556	0.503998	0.614262	NA
MIR3117	0	NA	NA	NA	NA	NA
ENSG00000248458	0	NA	NA	NA	NA	NA
DYNLT5	0.433008	1.51113	3.10294	0.487	0.626258	NA
INSL5	0	NA	NA	NA	NA	NA
DNAI4	18.1505	0.761897	0.492719	1.54631	0.122029	0.285206
ENSG00000231080	0	NA	NA	NA	NA	NA
MIER1	2108.34	0.0645032	0.124462	0.518257	0.604279	0.782227
ENSG00000289394	0.222216	1.89707	4.03699	0.469922	0.638411	NA
SLC35D1	690.152	-0.161105	0.146872	-1.09691	0.272681	0.491725
C1orf141	0	NA	NA	NA	NA	NA
ENSG00000252433	0	NA	NA	NA	NA	NA
ENSG00000275678	0.641213	-0.921612	3.25993	-0.282709	0.7774	NA
IL23R	0.222457	-1.86535	4.03466	-0.462332	0.643843	NA
RNU6-586P	0	NA	NA	NA	NA	NA
RNU4ATAC4P	0	NA	NA	NA	NA	NA
DNAJB6P4	0	NA	NA	NA	NA	NA
IL12RB2	3.25944	0.678951	1.15867	0.585976	0.557891	0.750219
SERBP1	16527.7	-0.174127	0.0910453	-1.91254	0.0558073	0.161551
RNU6-387P	0	NA	NA	NA	NA	NA
LINC01702	0	NA	NA	NA	NA	NA
RNU6-1031P	0	NA	NA	NA	NA	NA
ENSG00000238139	0	NA	NA	NA	NA	NA
RN7SL392P	0	NA	NA	NA	NA	NA
HNRNPCP9	0	NA	NA	NA	NA	NA
GADD45A	305.902	0.17162	0.228661	0.750544	0.452927	0.668809
GNG12	7104.9	-0.154473	0.139616	-1.10641	0.268548	0.486975
RNU7-80P	0	NA	NA	NA	NA	NA
GNG12-AS1	2.52845	0.468866	1.77635	0.263949	0.791819	NA
ENSG00000235055	0	NA	NA	NA	NA	NA
DIRAS3	3.4791	3.05333	1.30463	2.34038	0.0192643	0.0736709
ARL5AP3	0	NA	NA	NA	NA	NA
WLS	2185.54	1.46464	0.224759	6.51649	7.19692e-11	5.35408e-09
CTBP2P8	0	NA	NA	NA	NA	NA
MIR1262	0	NA	NA	NA	NA	NA
RPS7P4	0	NA	NA	NA	NA	NA
COX6B1P7	0	NA	NA	NA	NA	NA
ELOCP18	0	NA	NA	NA	NA	NA
ENSG00000229440	0	NA	NA	NA	NA	NA
RPE65	0.696773	1.52027	3.39875	0.447304	0.654656	NA
DEPDC1	2231.02	-0.315426	0.151866	-2.077	0.0378017	0.121911
ENSG00000233589	8.07328	-0.133702	0.680219	-0.196557	0.844174	0.924878
DEPDC1-AS1	1.12066	0.500716	1.8575	0.269565	0.787495	NA
TXNP2	0	NA	NA	NA	NA	NA
ENSG00000285041	0.866955	0.0769861	2.47834	0.0310636	0.975219	NA
ENSG00000285407	4.74821	-1.56282	1.0131	-1.54262	0.122922	0.286645
ENSG00000285473	0.311175	2.39245	3.9996	0.598173	0.549724	NA
LINC01707	0	NA	NA	NA	NA	NA
LINC02791	0	NA	NA	NA	NA	NA
LINC01758	0	NA	NA	NA	NA	NA
ENSG00000287453	0	NA	NA	NA	NA	NA
LRRC7	3.82514	-0.775262	1.00912	-0.768253	0.442337	0.659486
SGO1P1	0	NA	NA	NA	NA	NA
ENSG00000287283	0	NA	NA	NA	NA	NA
RN7SL538P	0	NA	NA	NA	NA	NA
PIN1P1	0	NA	NA	NA	NA	NA
LRRC7-AS1	0	NA	NA	NA	NA	NA
LRRC40	879.057	-0.176591	0.100947	-1.74935	0.0802313	0.210808
RN7SL242P	0.101982	-0.93263	4.08052	-0.228556	0.819214	NA
SRSF11	4694.66	-0.175964	0.0935061	-1.88184	0.0598573	0.170437
ENSG00000228988	0	NA	NA	NA	NA	NA
[truncated: 59,553 more rows]

## Sheet: res_AFF1_v_WT_DESeq2
gene name	baseMean	log2FoldChange	lfcSE	stat	pvalue	padj
DDX11L1	1.47075	-0.483644	3.26714	-0.148033	0.882317	NA
WASH7P	0	NA	NA	NA	NA	NA
MIR6859-1	0	NA	NA	NA	NA	NA
MIR1302-2HG	0	NA	NA	NA	NA	NA
MIR1302-2	0	NA	NA	NA	NA	NA
FAM138A	0	NA	NA	NA	NA	NA
OR4G4P	0	NA	NA	NA	NA	NA
OR4G11P	0	NA	NA	NA	NA	NA
OR4F5	0	NA	NA	NA	NA	NA
ENSG00000238009	1.52303	3.63112	2.15649	1.68381	0.0922183	NA
ENSG00000239945	0	NA	NA	NA	NA	NA
CICP27	0	NA	NA	NA	NA	NA
ENSG00000268903	0	NA	NA	NA	NA	NA
ENSG00000269981	0	NA	NA	NA	NA	NA
ENSG00000239906	0	NA	NA	NA	NA	NA
ENSG00000241860	66.1651	0.0145945	0.281029	0.0519324	0.958583	0.986708
RNU6-1100P	0	NA	NA	NA	NA	NA
ENSG00000241599	0	NA	NA	NA	NA	NA
DDX11L17	0	NA	NA	NA	NA	NA
WASH9P	0	NA	NA	NA	NA	NA
MIR6859-2	0	NA	NA	NA	NA	NA
ENSG00000228463	124.207	0.268779	0.194861	1.37934	0.167791	0.440056
ENSG00000286448	4.25045	-2.40489	1.21005	-1.98743	0.0468745	NA
RPL23AP24	0	NA	NA	NA	NA	NA
ENSG00000236601	0.459686	0	4.08046	0	1	NA
ENSG00000237094	68.0082	0.0109086	0.242822	0.0449243	0.964168	0.988236
WBP1LP7	0	NA	NA	NA	NA	NA
OR4F29	1.62955	-0.764849	2.10834	-0.362773	0.716774	NA
CICP7	0	NA	NA	NA	NA	NA
ENSG00000250575	0	NA	NA	NA	NA	NA
U6_1	0	NA	NA	NA	NA	NA
ENSG00000230021	6.25361	0.153803	0.916609	0.167796	0.866744	NA
ENSG00000235146	0.255933	2.0811	4.02524	0.517011	0.605148	NA
MTND1P23	0	NA	NA	NA	NA	NA
MTND2P28	0	NA	NA	NA	NA	NA
MTCO1P12	0	NA	NA	NA	NA	NA
ENSG00000278791	0	NA	NA	NA	NA	NA
MTCO2P12	0	NA	NA	NA	NA	NA
MTATP8P1	0	NA	NA	NA	NA	NA
MTATP6P1	0	NA	NA	NA	NA	NA
MTCO3P12	0	NA	NA	NA	NA	NA
WBP1LP6	0	NA	NA	NA	NA	NA
OR4F16	1.71497	-1.05514	1.8971	-0.556188	0.578082	NA
CICP3	0	NA	NA	NA	NA	NA
ENSG00000228327	190.578	-0.146557	0.211834	-0.691846	0.489034	0.745371
RNU6-1199P	0	NA	NA	NA	NA	NA
ENSG00000229905	0	NA	NA	NA	NA	NA
LINC01409	20.8902	0.0981554	0.426849	0.229954	0.818128	0.927465
ENSG00000285268	0	NA	NA	NA	NA	NA
ENSG00000230092	11.0608	-1.01634	0.598075	-1.69935	0.0892526	0.313582
FAM87B	10.6921	-0.252538	0.617511	-0.408962	0.682567	0.860449
LINC01128	282.956	-0.32602	0.16718	-1.95011	0.0511624	0.234331
LINC00115	11.5911	-0.295565	0.631745	-0.467855	0.639888	0.834496
ENSG00000288531	0.870646	-3.36175	2.26138	-1.4866	0.137122	NA
FAM41C	5.42918	0.70856	1.01517	0.697973	0.485194	NA
TUBB8P11	0	NA	NA	NA	NA	NA
ENSG00000283040	0	NA	NA	NA	NA	NA
ENSG00000272438	0	NA	NA	NA	NA	NA
ENSG00000230699	0.219918	0	4.08046	0	1	NA
ENSG00000241180	0	NA	NA	NA	NA	NA
LINC02593	13.0746	-0.0406643	0.695144	-0.0584976	0.953352	0.985281
SAMD11	11.6473	-0.870774	0.848467	-1.02629	0.304755	0.598085
NOC2L	2481.2	-0.422941	0.142932	-2.95905	0.00308591	0.0508902
KLHL17	58.8914	-0.215167	0.281898	-0.763281	0.445296	0.713476
PLEKHN1	86.9952	-0.0642769	0.36038	-0.178359	0.858441	0.943893
PERM1	4.34829	0.647367	1.06925	0.605439	0.544887	NA
ENSG00000272512	0.30769	-1.71423	4.04441	-0.42385	0.671675	NA
HES4	15.5937	-0.634917	0.631759	-1.005	0.314897	0.609073
ISG15	121.516	0.0757478	0.267306	0.283374	0.77689	0.907904
ENSG00000231702	0	NA	NA	NA	NA	NA
ENSG00000224969	0	NA	NA	NA	NA	NA
AGRN	1560.45	-0.381438	0.194373	-1.9624	0.0497158	0.23186
ENSG00000242590	0	NA	NA	NA	NA	NA
ENSG00000217801	34.8704	0.26074	0.650348	0.400923	0.688476	0.864162
ENSG00000273443	1.64997	-2.84138	1.74453	-1.62874	0.103369	NA
RNF223	19.7479	1.00603	0.566164	1.77692	0.0755813	0.286939
C1orf159	124.782	-0.332034	0.240557	-1.38027	0.167503	0.439459
ENSG00000285812	2.00107	0.0801928	1.34688	0.0595398	0.952522	NA
LINC01342	0	NA	NA	NA	NA	NA
MIR200B	0	NA	NA	NA	NA	NA
MIR200A	0	NA	NA	NA	NA	NA
MIR429	0	NA	NA	NA	NA	NA
ENSG00000272141	0.232385	0	4.08046	0	1	NA
TTLL10-AS1	0.211241	-0.890049	4.08046	-0.218125	0.827332	NA
TTLL10	0.101982	-0.890057	4.08046	-0.218127	0.82733	NA
TNFRSF18	0	NA	NA	NA	NA	NA
TNFRSF4	0	NA	NA	NA	NA	NA
SDF4	2492.71	-0.132804	0.105391	-1.2601	0.207632	0.491355
B3GALT6	213.632	-0.0534343	0.189858	-0.281443	0.778371	0.90875
C1QTNF12	2.19992	-0.138689	1.18009	-0.117524	0.906445	NA
ENSG00000260179	1.91523	1.06038	1.44192	0.735391	0.462101	NA
UBE2J2	1175.85	-0.144236	0.106696	-1.35184	0.176427	0.450534
LINC01786	0.334817	-0.890041	4.08046	-0.218123	0.827333	NA
SCNN1D	13.5637	-0.115012	0.681573	-0.168746	0.865997	0.948713
ACAP3	496.578	-0.0992755	0.209411	-0.474071	0.635449	0.832164
MIR6726	0	NA	NA	NA	NA	NA
PUSL1	279.647	-0.274025	0.159563	-1.71735	0.0859147	0.307693
INTS11	1222.36	-0.169788	0.0975314	-1.74085	0.0817094	0.299365
MIR6727	0	NA	NA	NA	NA	NA
ENSG00000240731	14.0001	-0.438108	0.532582	-0.822612	0.410729	0.689155
CPTP	380.229	-0.0120296	0.117048	-0.102774	0.918142	0.97
TAS1R3	20.5956	0.71897	0.58708	1.22466	0.220705	0.508089
DVL1	1632.12	-0.236826	0.114411	-2.06996	0.0384556	0.201405
MIR6808	0	NA	NA	NA	NA	NA
MXRA8	270.852	0.491301	0.331273	1.48307	0.138056	0.397526
AURKAIP1	1008.27	-0.476256	0.122036	-3.90258	9.51733e-05	0.00551403
NDUFB4P8	0	NA	NA	NA	NA	NA
CCNL2	1928.01	0.0298994	0.101585	0.294329	0.768506	0.903784
MRPL20-AS1	298.544	-0.218053	0.134091	-1.62616	0.103915	0.340302
MRPL20	1053.02	-0.408617	0.111053	-3.67949	0.0002337	0.0101793
RN7SL657P	0	NA	NA	NA	NA	NA
MRPL20-DT	44.6392	-0.0675216	0.352093	-0.191772	0.847921	0.938682
ANKRD65	15.9123	2.01086	0.771994	2.60477	0.00919365	0.0941723
ANKRD65-AS1	0	NA	NA	NA	NA	NA
TMEM88B	2.77662	-0.89407	1.2513	-0.714514	0.474909	NA
LINC01770	2.04946	1.40863	1.51791	0.928004	0.353405	NA
VWA1	2582.8	0.111718	0.155863	0.71677	0.473516	0.734026
ATAD3C	7.09477	2.00131	1.164	1.71934	0.0855521	NA
ATAD3B	842.335	-0.618113	0.163014	-3.79177	0.000149578	0.00748296
ENSG00000284740	0.646577	-1.42908	2.55644	-0.559013	0.576153	NA
ATAD3A	578.85	-0.494562	0.168604	-2.93328	0.00335402	0.0531494
TMEM240	3.46338	0.382079	1.46737	0.260383	0.794568	NA
SSU72	2923.07	-0.000817459	0.0907037	-0.00901241	0.992809	0.99749
ENSG00000215014	9.97898	-0.355275	0.632756	-0.561472	0.574476	NA
ENSG00000274481	0	NA	NA	NA	NA	NA
FNDC10	40.4177	0.189081	0.361869	0.522512	0.601314	0.811682
ENSG00000286989	4.32478	1.11866	1.19646	0.934976	0.349801	NA
ENSG00000272106	48.9164	0.182885	0.343869	0.531846	0.594833	0.808385
MIB2	427.774	0.465139	0.23713	1.96154	0.0498162	0.231996
MMP23B	9.19672	0.55052	0.71582	0.769077	0.441848	NA
CDK11B	1246.87	-0.304879	0.11159	-2.73213	0.0062927	0.075557
ENSG00000272004	0.98189	1.98002	2.6964	0.734321	0.462753	NA
SLC35E2B	1272.94	0.259162	0.0965072	2.68542	0.00724395	0.0825676
ENSG00000269737	5.71908	-0.665943	0.830729	-0.801637	0.422763	NA
MMP23A	0	NA	NA	NA	NA	NA
CDK11A	840.639	-0.315214	0.130443	-2.41648	0.0156714	0.126146
ENSG00000268575	62.3179	0.245626	0.325127	0.755475	0.449964	0.715654
ENSG00000227775	11.518	-1.14295	0.640324	-1.78495	0.0742693	0.28424
SLC35E2A	23.3425	0.00317701	0.441191	0.00720099	0.994254	0.998225
NADK	2165.58	-0.0225209	0.0841454	-0.267642	0.788975	0.913996
GNB1	5455.42	0.152167	0.0776222	1.96036	0.0499541	0.232057
GNB1-DT	0.865937	-0.960058	2.15833	-0.444815	0.656453	NA
CALML6	1.9563	0.0494387	1.37354	0.0359936	0.971287	NA
TMEM52	42.0775	-0.373662	0.296247	-1.26132	0.207193	0.491057
CFAP74	25.5426	-0.241326	0.448491	-0.538086	0.590518	0.805459
ENSG00000233542	0	NA	NA	NA	NA	NA
GABRD	3.89234	-1.32744	1.27169	-1.04384	0.296561	NA
PRKCZ-DT	0	NA	NA	NA	NA	NA
PRKCZ	6375.57	0.0328775	0.214409	0.15334	0.87813	0.955537
ENSG00000271806	31.2507	-0.175921	0.46291	-0.380033	0.703921	0.871456
PRKCZ-AS1	49.0721	-0.361675	0.296344	-1.22045	0.222293	0.510157
FAAP20	239.999	-0.130963	0.173368	-0.755406	0.450006	0.715654
ENSG00000234396	0	NA	NA	NA	NA	NA
SKI	1232.73	0.254357	0.133273	1.90853	0.0563223	0.246145
ENSG00000287356	6.87285	0.769526	0.984712	0.781473	0.434524	NA
MORN1	58.3975	0.0952925	0.272052	0.350274	0.726133	0.882913
ENSG00000272161	0.114941	-0.890057	4.08046	-0.218127	0.82733	NA
ENSG00000269896	2.5193	0.41921	1.45294	0.288525	0.772945	NA
ENSG00000272420	0.626235	-1.38324	2.91596	-0.47437	0.635236	NA
RER1	3086.41	-0.0939436	0.112304	-0.83651	0.402868	0.683316
PEX10	281.187	-0.207581	0.148524	-1.39762	0.162226	0.432033
PLCH2	0.30769	-1.71423	4.04441	-0.42385	0.671675	NA
ENSG00000224387	0	NA	NA	NA	NA	NA
ENSG00000229393	0	NA	NA	NA	NA	NA
PANK4	330.846	0.00625898	0.130217	0.0480659	0.961664	0.987406
HES5	0	NA	NA	NA	NA	NA
ENSG00000272449	4.54995	-0.438755	1.13826	-0.38546	0.699896	NA
TNFRSF14-AS1	0.383899	2.67256	3.98581	0.67052	0.502527	NA
TNFRSF14	7.0925	0.597245	0.966974	0.617643	0.53681	NA
ENSG00000225931	0	NA	NA	NA	NA	NA
ENSG00000228037	0	NA	NA	NA	NA	NA
ENSG00000289610	0	NA	NA	NA	NA	NA
PRXL2B	56.6931	0.287531	0.409142	0.702766	0.482202	0.740504
MMEL1	4.19467	-1.56931	1.15935	-1.35361	0.17586	NA
MMEL1-AS1	0.114941	-0.890057	4.08046	-0.218127	0.82733	NA
TTC34	2.10394	-1.98135	1.54464	-1.28273	0.199587	NA
ENSG00000285945	0	NA	NA	NA	NA	NA
ENSG00000283259	0	NA	NA	NA	NA	NA
ENSG00000233234	0	NA	NA	NA	NA	NA
ENSG00000287396	0	NA	NA	NA	NA	NA
ENSG00000231630	0	NA	NA	NA	NA	NA
ENSG00000284745	0	NA	NA	NA	NA	NA
ACTRT2	0	NA	NA	NA	NA	NA
PRDM16-DT	0	NA	NA	NA	NA	NA
PRDM16	2.56884	0.453262	1.3777	0.328999	0.742157	NA
MIR4251	0	NA	NA	NA	NA	NA
ENSG00000226286	0	NA	NA	NA	NA	NA
ENSG00000279839	0	NA	NA	NA	NA	NA
ENSG00000272235	0	NA	NA	NA	NA	NA
ENSG00000287828	0	NA	NA	NA	NA	NA
ENSG00000286518	0	NA	NA	NA	NA	NA
ARHGEF16	232.258	-0.0500392	0.157077	-0.318564	0.750057	0.896326
ENSG00000272088	0.567734	1.0243	2.67633	0.382726	0.701923	NA
MEGF6	13.5415	0.00272013	0.702575	0.00387166	0.996911	0.999024
MIR551A	0	NA	NA	NA	NA	NA
ENSG00000238260	0.651421	0.0717165	2.62804	0.0272889	0.978229	NA
TPRG1L	485.036	0.661342	0.19905	3.32249	0.000892169	0.0243527
WRAP73	343.729	-0.244165	0.126015	-1.93759	0.0526737	0.2383
TP73	50.6971	0.127207	0.344789	0.368941	0.712172	0.876051
TP73-AS3	0.203541	1.79369	4.05087	0.442792	0.657916	NA
TP73-AS2	0	NA	NA	NA	NA	NA
TP73-AS1	410.186	-0.0505032	0.134781	-0.374704	0.70788	0.873678
ENSG00000276189	0	NA	NA	NA	NA	NA
CCDC27	0	NA	NA	NA	NA	NA
SMIM1	5.53838	-0.130807	0.92035	-0.142128	0.886979	NA
LRRC47	1344.11	-0.104797	0.114362	-0.916355	0.359481	0.648208
RN7SL574P	0.883713	0.0122604	2.09991	0.00583854	0.995342	NA
ENSG00000272153	11.2223	-0.766388	0.609733	-1.25692	0.208781	0.492328
CEP104	765.934	-0.0725987	0.105043	-0.691134	0.489481	0.745456
DFFB	143.123	0.136522	0.215544	0.633381	0.526485	0.768194
C1orf174	855.325	-0.112866	0.14312	-0.788611	0.430339	0.703597
LINC01134	4.22176	0.0724226	1.03275	0.070126	0.944093	NA
LINC01346	0	NA	NA	NA	NA	NA
LINC01345	0	NA	NA	NA	NA	NA
LINC02780	0.776567	-2.46271	3.08203	-0.799056	0.424258	NA
ENSG00000284703	0.46522	1.61464	3.62523	0.44539	0.656038	NA
EEF1DP6	0	NA	NA	NA	NA	NA
LINC01777	0	NA	NA	NA	NA	NA
ENSG00000284694	0	NA	NA	NA	NA	NA
ENSG00000227169	0	NA	NA	NA	NA	NA
LINC01646	0	NA	NA	NA	NA	NA
AJAP1	54.2816	-2.18146	0.677684	-3.219	0.00128639	0.0303052
ENSG00000287586	0.222216	0	4.08046	0	1	NA
ENSG00000284739	0	NA	NA	NA	NA	NA
LINC02781	0	NA	NA	NA	NA	NA
LINC02782	0	NA	NA	NA	NA	NA
ENSG00000284616	0	NA	NA	NA	NA	NA
ENSG00000284692	2.4962	0	2.39281	0	1	NA
ENSG00000284666	0	NA	NA	NA	NA	NA
ENSG00000260972	0	NA	NA	NA	NA	NA
ENSG00000283356	0	NA	NA	NA	NA	NA
ENSG00000236948	0	NA	NA	NA	NA	NA
ENSG00000264341	0	NA	NA	NA	NA	NA
MIR4689	0	NA	NA	NA	NA	NA
NPHP4	196.009	-0.100608	0.210542	-0.477853	0.632755	0.830897
KCNAB2	26.8919	0.965484	0.503674	1.91688	0.0552527	0.244017
CHD5	1.25578	0.852972	1.78265	0.478486	0.632305	NA
ENSG00000285629	2.35662	-0.779834	1.25925	-0.619283	0.53573	NA
RPL22	19961.5	0.120937	0.0704423	1.71682	0.0860129	0.307863
RNF207-AS1	0.85379	-2.77079	2.37306	-1.1676	0.242968	NA
RNF207	195.399	-0.28605	0.254471	-1.1241	0.260971	0.552552
ICMT	4626.05	-0.00441711	0.0911258	-0.0484726	0.96134	0.98734
ICMT-DT	26.4004	-0.264555	0.43963	-0.601769	0.547328	0.779442
HES3	0	NA	NA	NA	NA	NA
GPR153	59.3193	-0.285334	0.343564	-0.830512	0.40625	0.68567
ACOT7	804.251	-0.120254	0.183829	-0.65416	0.513008	0.75987
ENSG00000271746	2.60069	-0.423836	1.34417	-0.315315	0.752523	NA
HES2	7594.71	-0.0155126	0.270754	-0.0572942	0.954311	0.985586
ESPN	452.18	0.194409	0.347202	0.55993	0.575527	0.796683
MIR4252	0	NA	NA	NA	NA	NA
ENSG00000231868	0	NA	NA	NA	NA	NA
TNFRSF25	106.975	-0.263031	0.230648	-1.1404	0.254119	0.54596
PLEKHG5	143.083	-0.28684	0.236741	-1.21162	0.225659	0.514646
NOL9	882.391	-0.319244	0.145866	-2.18861	0.0286254	0.170595
RNU6-731P	0	NA	NA	NA	NA	NA
ENSG00000229519	0	NA	NA	NA	NA	NA
TAS1R1	0.107516	-0.890057	4.08046	-0.218127	0.82733	NA
ZBTB48	119.362	0.176196	0.201299	0.875293	0.381415	0.66528
KLHL21	588.997	0.0161652	0.129175	0.125141	0.900412	0.963015
PHF13	869.975	0.427975	0.203316	2.10497	0.0352937	0.192942
THAP3	125.446	0.216796	0.218574	0.991865	0.321263	0.615997
DNAJC11	2383.34	-0.345619	0.104425	-3.30973	0.000933844	0.0250243
LINC01672	0	NA	NA	NA	NA	NA
ENSG00000284744	0	NA	NA	NA	NA	NA
CAMTA1-DT	0.111108	0	4.08046	0	1	NA
CAMTA1	302.33	0.000590819	0.136437	0.00433035	0.996545	0.998889
ENSG00000227950	0	NA	NA	NA	NA	NA
ENSG00000237365	0	NA	NA	NA	NA	NA
RNU1-8P	0	NA	NA	NA	NA	NA
CAMTA1-IT1	0	NA	NA	NA	NA	NA
CAMTA1-AS2	0	NA	NA	NA	NA	NA
CAMTA1-AS1	0	NA	NA	NA	NA	NA
ENSG00000270171	0.333324	0	4.08046	0	1	NA
ENSG00000270035	0	NA	NA	NA	NA	NA
ENSG00000269978	0	NA	NA	NA	NA	NA
VAMP3	2846.63	0.126106	0.0824005	1.5304	0.125917	0.3779
ENSG00000269925	1.8994	0.853649	1.49829	0.569749	0.568848	NA
PER3	21.0313	0.277701	0.432991	0.641355	0.521292	0.765487
ENSG00000236266	0.327367	-0.818554	4.03835	-0.202695	0.839373	NA
UTS2	0.334156	1.0335	4.08046	0.253282	0.800051	NA
TNFRSF9	4.30221	1.03351	2.13621	0.483806	0.628524	NA
ENSG00000270330	0	NA	NA	NA	NA	NA
PARK7	5639.9	-0.208449	0.080988	-2.57382	0.0100582	0.0996172
Y_RNA_1	0	NA	NA	NA	NA	NA
ENSG00000284747	14.819	-0.513028	0.506847	-1.0122	0.311444	0.605994
ENSG00000284716	1.00471	0.222186	2.57247	0.0863706	0.931172	NA
ERRFI1	14749.3	0.126755	0.189462	0.669023	0.503481	0.75314
ERRFI1-DT	3.59852	-1.27236	1.09651	-1.16037	0.245897	NA
ENSG00000232848	0	NA	NA	NA	NA	NA
ENSG00000229305	0	NA	NA	NA	NA	NA
ENSG00000288816	0.418997	-2.74482	3.97474	-0.690566	0.489838	NA
LINC01714	0.216923	-1.79072	4.03742	-0.44353	0.657382	NA
RNU1-7P	0	NA	NA	NA	NA	NA
ENSG00000233645	0	NA	NA	NA	NA	NA
RNU6-991P	0	NA	NA	NA	NA	NA
SLC45A1	22.284	0.279613	0.451485	0.619319	0.535706	0.77296
Y_RNA_2	0	NA	NA	NA	NA	NA
RERE	2261.39	0.0607438	0.122932	0.494126	0.621217	0.82338
RERE-AS1	0	NA	NA	NA	NA	NA
ENSG00000221083	0	NA	NA	NA	NA	NA
ENSG00000270282	0	NA	NA	NA	NA	NA
RPL7P11	0	NA	NA	NA	NA	NA
RPL7P7	0	NA	NA	NA	NA	NA
Y_RNA_3	0	NA	NA	NA	NA	NA
ENSG00000226545	0	NA	NA	NA	NA	NA
ENSG00000228423	0.116193	0	4.08046	0	1	NA
RPL23AP19	0	NA	NA	NA	NA	NA
ENO1	38705.6	0.17931	0.125483	1.42896	0.153015	0.418295
MIR6728	0	NA	NA	NA	NA	NA
ENO1-AS1	1.8861	0.341311	1.42462	0.23958	0.810656	NA
RNU6-304P	0	NA	NA	NA	NA	NA
HMGN2P17	0	NA	NA	NA	NA	NA
ENSG00000232208	0	NA	NA	NA	NA	NA
ENSG00000232663	0	NA	NA	NA	NA	NA
CA6	0.991716	-0.820149	2.44873	-0.334929	0.737679	NA
RN7SL451P	0	NA	NA	NA	NA	NA
SLC2A7	0	NA	NA	NA	NA	NA
SLC2A5	7.44499	-0.676557	0.819079	-0.825997	0.408806	NA
ENSG00000252404	0	NA	NA	NA	NA	NA
GPR157	2194.09	0.826291	0.224029	3.68832	0.000225742	0.00990695
MIR34AHG	212.628	-0.291581	0.19925	-1.46339	0.14336	0.406062
MIR34A	0	NA	NA	NA	NA	NA
LNCTAM34A	40.8613	0.0960937	0.343981	0.279358	0.77997	0.909443
H6PD	868.098	0.239493	0.105369	2.2729	0.0230322	0.152625
SPSB1	47.0815	-1.08901	0.348818	-3.12201	0.00179624	0.0370313
ENSG00000284652	0.107516	-0.890057	4.08046	-0.218127	0.82733	NA
LINC02606	0.321688	1.0335	4.08046	0.253282	0.800051	NA
RNA5SP40	0	NA	NA	NA	NA	NA
ENSG00000235263	0	NA	NA	NA	NA	NA
SLC25A33	568.706	-0.198593	0.152767	-1.29997	0.193611	0.472362
ENSG00000231181	0	NA	NA	NA	NA	NA
TMEM201	331.707	-0.420047	0.189531	-2.21625	0.0266747	0.164285
PIK3CD	182.421	-0.205647	0.293856	-0.699823	0.484038	0.741357
PIK3CD-AS1	0	NA	NA	NA	NA	NA
ENSG00000233268	0	NA	NA	NA	NA	NA
PIK3CD-AS2	17.5453	0.143891	0.492677	0.29206	0.770241	0.90459
CLSTN1	3019.67	0.110864	0.115373	0.960922	0.336591	0.628344
MZT1P1	0	NA	NA	NA	NA	NA
ENSG00000280113	0	NA	NA	NA	NA	NA
CTNNBIP1	357.454	0.218935	0.180923	1.2101	0.22624	0.515324
ENSG00000223989	0	NA	NA	NA	NA	NA
ENSG00000285701	0.101982	-0.890057	4.08046	-0.218127	0.82733	NA
LZIC	1544.97	-0.0903934	0.0738436	-1.22412	0.220907	0.508185
ENSG00000228150	0.444673	-1.82191	3.76277	-0.484195	0.628248	NA
NMNAT1	476.819	-0.0573613	0.119227	-0.481111	0.630438	0.829918
RN7SKP269	0.224668	1.91683	4.03928	0.474548	0.635109	NA
TMEM274P	0	NA	NA	NA	NA	NA
MIR5697	0	NA	NA	NA	NA	NA
ENSG00000241326	0.240301	2.00069	4.03192	0.496212	0.619745	NA
RBP7	24.678	0.64515	0.419543	1.53775	0.124111	0.375065
UBE4B	3117.1	-0.0973748	0.130701	-0.745017	0.456262	0.720444
ENSG00000224340	0	NA	NA	NA	NA	NA
PGAM1P11	0	NA	NA	NA	NA	NA
RNU6-828P	0	NA	NA	NA	NA	NA
KIF1B	1931.97	0.062988	0.117268	0.537127	0.59118	0.805795
ENSG00000264881	0	NA	NA	NA	NA	NA
RNU6-37P	0	NA	NA	NA	NA	NA
RN7SL731P	0	NA	NA	NA	NA	NA
ENSG00000284735	1.53652	-0.247482	1.71812	-0.144043	0.885467	NA
ENSG00000284642	2.10041	0.465535	1.21607	0.382819	0.701854	NA
PGD	4663.16	-0.268724	0.129954	-2.06785	0.0386543	0.202067
ENSG00000271989	0.572537	2.57151	2.94245	0.873935	0.382154	NA
CENPS-CORT	9.41955	0.0900854	1.0167	0.0886054	0.929395	NA
CENPS	208.311	-0.124163	0.172385	-0.720266	0.471361	0.732141
CORT	2.30874	-1.27395	1.44442	-0.881979	0.377788	NA
DFFA	3138.16	-0.0891604	0.0887702	-1.0044	0.315188	0.609082
ENSG00000203469	0.239074	1.0335	4.08046	0.25328	0.800052	NA
PEX14	374.889	-0.0474119	0.129442	-0.366278	0.714158	0.877033
ENSG00000287727	1.56532	0.738603	1.93609	0.381491	0.702839	NA
RN7SL614P	0	NA	NA	NA	NA	NA
CASZ1	73.9029	-0.297165	0.347191	-0.855913	0.392046	0.674327
ENSG00000272078	11.4176	-0.517171	0.705783	-0.732762	0.463704	0.725939
HSPE1P24	0	NA	NA	NA	NA	NA
C1orf127	0	NA	NA	NA	NA	NA
CFL1P6	0	NA	NA	NA	NA	NA
TARDBP	6327.79	-0.0678927	0.0961942	-0.705788	0.48032	0.739137
MASP2	28.2536	-0.415849	0.485527	-0.85649	0.391727	0.674327
SRM	1798.22	-0.647415	0.166426	-3.89011	0.0001002	0.00569274
EXOSC10	2405.47	0.0527508	0.0899272	0.586595	0.557476	0.785719
ENSG00000226849	1.63469	-0.410557	2.15019	-0.19094	0.848573	NA
EXOSC10-AS1	5.27245	0.298238	0.944359	0.31581	0.752147	NA
MTOR	2299.75	-0.331241	0.136406	-2.42835	0.0151678	0.123806
MTOR-AS1	0	NA	NA	NA	NA	NA
RNU6-537P	0	NA	NA	NA	NA	NA
ANGPTL7	0.103725	0	4.08046	0	1	NA
RNU6-291P	0	NA	NA	NA	NA	NA
RPL39P6	0	NA	NA	NA	NA	NA
UBIAD1	713.306	-0.208725	0.138892	-1.50278	0.132895	0.389283
UBE2V2P3	0	NA	NA	NA	NA	NA
ENSG00000284646	0	NA	NA	NA	NA	NA
MTCYBP45	0	NA	NA	NA	NA	NA
DISP3	1.8374	0.477546	1.74528	0.273622	0.784375	NA
ENSG00000285833	0.209499	-1.74756	4.04132	-0.432422	0.665435	NA
LINC01647	3.72479	-3.31211	1.52602	-2.17042	0.0299751	NA
ENSG00000284708	0	NA	NA	NA	NA	NA
FBXO2	16.6392	0.0135678	0.563104	0.0240946	0.980777	0.993846
FBXO44	94.8719	0.366843	0.285309	1.28578	0.198521	0.478999
FBXO6	46.7465	-0.0829212	0.350834	-0.236354	0.813158	0.924438
MAD2L2	189.918	-0.467916	0.197094	-2.37408	0.0175927	0.133043
DRAXIN	3.40423	-0.496629	1.16564	-0.426057	0.670067	NA
AGTRAP	188.574	-0.112157	0.178321	-0.62896	0.529375	0.769722
C1orf167	0.20745	0	4.08046	0	1	NA
C1orf167-AS1	0	NA	NA	NA	NA	NA
MTHFR	494.054	-0.169437	0.131129	-1.29214	0.196308	0.476061
CLCN6	406.829	-0.036309	0.118515	-0.306366	0.759326	0.900883
ENSG00000276470	0	NA	NA	NA	NA	NA
ENSG00000278852	0	NA	NA	NA	NA	NA
NPPA	0	NA	NA	NA	NA	NA
ENSG00000275915	0	NA	NA	NA	NA	NA
NPPB	2.42391	0.960737	1.96869	0.488007	0.625545	NA
SBF1P2	0	NA	NA	NA	NA	NA
ENSG00000285646	3.90256	0.138882	0.988549	0.140491	0.888272	NA
RNU5E-1	0.342216	-0.902552	4.03102	-0.223901	0.822834	NA
RNU5E-4P	0	NA	NA	NA	NA	NA
KIAA2013	1079.26	0.0271435	0.0904897	0.299963	0.764206	0.902469
PLOD1	3755.06	0.0191695	0.131577	0.145691	0.884166	0.957724
ENSG00000287384	0.127966	1.03349	4.08046	0.253278	0.800054	NA
MFN2	3357.02	-0.164663	0.092926	-1.77198	0.0763978	0.288291
ENSG00000270914	0	NA	NA	NA	NA	NA
MIIP	254.382	-0.125582	0.156104	-0.804478	0.421121	0.695918
Y_RNA_4	0	NA	NA	NA	NA	NA
MIR6729	0	NA	NA	NA	NA	NA
RN7SL649P	0	NA	NA	NA	NA	NA
TNFRSF8	7.28537	-0.097646	0.756027	-0.129157	0.897234	NA
RNU6-777P	0	NA	NA	NA	NA	NA
RPL23AP89	0	NA	NA	NA	NA	NA
ENSG00000285604	0	NA	NA	NA	NA	NA
MIR7846	0	NA	NA	NA	NA	NA
TNFRSF1B	10141.3	0.387271	0.289558	1.33745	0.181075	0.456518
MIR4632	0	NA	NA	NA	NA	NA
RPL10P17	0	NA	NA	NA	NA	NA
SNORA70_1	0	NA	NA	NA	NA	NA
VPS13D	1913.79	-0.0621713	0.15456	-0.402247	0.687502	0.863309
SNORA59A	0	NA	NA	NA	NA	NA
LINC02766	0.103725	0	4.08046	0	1	NA
DHRS3	101.021	0.123071	0.238491	0.516043	0.605824	0.814321
RNU6ATAC18P	0	NA	NA	NA	NA	NA
MIR6730	0	NA	NA	NA	NA	NA
ENSG00000288927	1.65867	-1.49073	1.76307	-0.845529	0.397815	NA
ENSG00000272482	1.14497	0.169312	2.06465	0.0820052	0.934643	NA
AADACL4	0	NA	NA	NA	NA	NA
ENSG00000226166	0	NA	NA	NA	NA	NA
AADACL3	5.21877	1.18366	1.27356	0.929415	0.352674	NA
CFAP107	0.222216	0	4.08046	0	1	NA
PRAMEF12	0	NA	NA	NA	NA	NA
PRAMEF1	0	NA	NA	NA	NA	NA
LINC01784	0	NA	NA	NA	NA	NA
PRAMEF11	0.101982	-0.890057	4.08046	-0.218127	0.82733	NA
PRAMEF30P	0	NA	NA	NA	NA	NA
HNRNPCL1	0.735643	-1.80878	2.43585	-0.742567	0.457744	NA
PRAMEF2	0	NA	NA	NA	NA	NA
PRAMEF4	0	NA	NA	NA	NA	NA
PRAMEF10	0	NA	NA	NA	NA	NA
PRAMEF7	0	NA	NA	NA	NA	NA
RNU6-1072P	0	NA	NA	NA	NA	NA
PRAMEF29P	0	NA	NA	NA	NA	NA
PRAMEF6	0	NA	NA	NA	NA	NA
PRAMEF28P	0	NA	NA	NA	NA	NA
PRAMEF27	0	NA	NA	NA	NA	NA
HNRNPCL3	0	NA	NA	NA	NA	NA
PRAMEF25	12.9139	-0.151981	0.775971	-0.19586	0.84472	0.937646
PRAMEF34P	0	NA	NA	NA	NA	NA
PRAMEF35P	0	NA	NA	NA	NA	NA
HNRNPCL2	0	NA	NA	NA	NA	NA
PRAMEF36P	0	NA	NA	NA	NA	NA
ENSG00000233336	0	NA	NA	NA	NA	NA
PRAMEF26	0	NA	NA	NA	NA	NA
HNRNPCL4	0	NA	NA	NA	NA	NA
PRAMEF9	0	NA	NA	NA	NA	NA
PRAMEF13	0	NA	NA	NA	NA	NA
PRAMEF18	8.82757	-0.0427005	0.887343	-0.0481218	0.961619	NA
PRAMEF31P	0	NA	NA	NA	NA	NA
PRAMEF5	0	NA	NA	NA	NA	NA
PRAMEF32P	0	NA	NA	NA	NA	NA
RNU6-771P	0	NA	NA	NA	NA	NA
PRAMEF8	0	NA	NA	NA	NA	NA
PRAMEF33	0	NA	NA	NA	NA	NA
PRAMEF15	0	NA	NA	NA	NA	NA
ENSG00000228229	0	NA	NA	NA	NA	NA
PRAMEF14	0	NA	NA	NA	NA	NA
PRAMEF19	3.09398	1.54766	1.19039	1.30013	0.193557	NA
PRAMEF17	0	NA	NA	NA	NA	NA
PRAMEF20	0	NA	NA	NA	NA	NA
LRRC38	0	NA	NA	NA	NA	NA
ENSG00000259961	0	NA	NA	NA	NA	NA
BRWD1P1	0	NA	NA	NA	NA	NA
PDPN	0	NA	NA	NA	NA	NA
RNA5SP41	0	NA	NA	NA	NA	NA
ENSG00000237445	0	NA	NA	NA	NA	NA
ENSG00000253085	0	NA	NA	NA	NA	NA
PRDM2	1322.37	0.055792	0.0870786	0.640709	0.521712	0.765668
ENSG00000289380	0.860021	0.957709	2.14799	0.445863	0.655696	NA
KAZN	1068.49	0.34751	0.214662	1.61887	0.105475	0.343566
RNU6-1265P	0	NA	NA	NA	NA	NA
ENSG00000231606	0	NA	NA	NA	NA	NA
KAZN-AS1	0	NA	NA	NA	NA	NA
TBCAP2	0	NA	NA	NA	NA	NA
ENSG00000287756	0	NA	NA	NA	NA	NA
TMEM51-AS1	52.8119	3.54755	0.972044	3.64957	0.000262675	0.0109695
TMEM51	91.8812	1.03966	0.351399	2.95865	0.00308993	0.0508902
TMEM51-AS2	0.101771	1.03349	4.08046	0.253278	0.800054	NA
MFFP1	0	NA	NA	NA	NA	NA
ZBTB2P1	0	NA	NA	NA	NA	NA
FHAD1	1.35952	0.0717176	2.3098	0.0310492	0.97523	NA
FHAD1-AS1	0.127966	1.03349	4.08046	0.253278	0.800054	NA
ENSG00000236045	0	NA	NA	NA	NA	NA
EFHD2-AS1	1.18308	2.4332	2.52152	0.964971	0.334559	NA
EFHD2	1458.3	0.406023	0.133153	3.0493	0.00229377	0.0431606
CTRC	0	NA	NA	NA	NA	NA
CELA2A	0.127966	1.03349	4.08046	0.253278	0.800054	NA
CELA2B	0.383899	2.67256	3.98581	0.67052	0.502527	NA
CASP9	332.427	0.846449	0.237244	3.56785	0.000359928	0.0136679
DNAJC16	886.831	0.123846	0.117485	1.05414	0.291817	0.585631
SCARNA21B	0	NA	NA	NA	NA	NA
ENSG00000272510	0	NA	NA	NA	NA	NA
AGMAT	9.03581	-0.844788	0.66697	-1.2666	0.205297	NA
ENSG00000237301	0	NA	NA	NA	NA	NA
CHCHD2P6	0	NA	NA	NA	NA	NA
RNU7-179P	0	NA	NA	NA	NA	NA
CD24P1	0	NA	NA	NA	NA	NA
DDI2	3776.65	0.251367	0.1141	2.20303	0.0275924	0.167059
RSC1A1	122.773	-0.348368	0.246317	-1.41431	0.157271	0.424858
ENSG00000271742	0	NA	NA	NA	NA	NA
PLEKHM2	1073.43	0.184088	0.0993395	1.85313	0.0638644	0.262661
ENSG00000237938	1.51574	1.98171	1.85057	1.07087	0.284229	NA
SLC25A34	1.21387	-0.461417	1.90274	-0.242501	0.808392	NA
SLC25A34-AS1	0	NA	NA	NA	NA	NA
TMEM82	0.555919	0.0509357	2.62285	0.01942	0.984506	NA
FBLIM1	175.395	-0.541411	0.28397	-1.90658	0.0565755	0.246811
RPL12P14	0	NA	NA	NA	NA	NA
UQCRHL	1.22657	-0.142243	1.90303	-0.0747455	0.940417	NA
ENSG00000178715	0	NA	NA	NA	NA	NA
FLJ37453	19.3115	-0.654516	0.576404	-1.13552	0.256159	0.548462
SPEN	2464.19	0.108875	0.0928016	1.1732	0.240714	0.53199
ENSG00000270620	0	NA	NA	NA	NA	NA
ZBTB17	252.295	-0.123947	0.161385	-0.768023	0.442473	0.711886
ENSG00000234607	0	NA	NA	NA	NA	NA
ENSG00000231353	0	NA	NA	NA	NA	NA
ENSG00000275503	0	NA	NA	NA	NA	NA
TBC1D3P6	0	NA	NA	NA	NA	NA
SRARP	0	NA	NA	NA	NA	NA
ENSG00000233078	0	NA	NA	NA	NA	NA
HSPB7	43.1737	-0.571691	0.343267	-1.66544	0.0958246	0.325515
CLCNKA	6.0561	-0.859026	0.851406	-1.00895	0.312999	NA
ENSG00000232456	0	NA	NA	NA	NA	NA
CLCNKB	2.52121	0.893617	1.48658	0.601125	0.547757	NA
FAM131C	0.798069	0.0717198	2.84243	0.0252318	0.97987	NA
EPHA2	1151.88	0.0415531	0.207641	0.20012	0.841387	0.93662
EPHA2-AS1	3.35802	-0.127275	1.10019	-0.115684	0.907903	NA
ENSG00000224621	0.337465	-0.785854	4.02019	-0.195477	0.84502	NA
ARHGEF19-AS1	0	NA	NA	NA	NA	NA
ARHGEF19	42.3431	-0.16359	0.358946	-0.455751	0.648569	0.840931
ANO7L1	1.10516	-0.104444	2.71729	-0.0384367	0.96934	NA
ENSG00000288398	74.1298	-0.148488	0.272075	-0.545762	0.58523	0.801926
CPLANE2	42.1833	-0.396022	0.320585	-1.23531	0.216715	0.502788
MT1XP1	0	NA	NA	NA	NA	NA
FBXO42	747.387	0.34054	0.159216	2.13885	0.0324476	0.184116
SZRD1	5253.36	0.0447081	0.0848934	0.526638	0.598445	0.810198
RPL22P3	0	NA	NA	NA	NA	NA
SPATA21	0.51514	-1.71421	4.04441	-0.423847	0.671677	NA
NECAP2	970.802	0.144325	0.102355	1.41004	0.158528	0.426475
LINC01772	5.84778	1.38503	1.00888	1.37284	0.169804	NA
CROCCP3	8.90537	0.675675	0.676332	0.999029	0.317781	NA
RNU1-1	5.52759	-0.966321	1.23159	-0.78461	0.432682	NA
ENSG00000261135	2.23894	0.302495	1.40314	0.215585	0.829311	NA
ENSG00000285853	0	NA	NA	NA	NA	NA
ENSG00000224174	0	NA	NA	NA	NA	NA
LINC01783	6.489	-0.304437	0.866319	-0.351414	0.725278	NA
RNU1-6P	0	NA	NA	NA	NA	NA
PDE4DIPP8	0	NA	NA	NA	NA	NA
NBPF1	863.413	0.139322	0.118044	1.18025	0.237902	0.528816
ENSG00000271732	0	NA	NA	NA	NA	NA
CROCCP2	295.644	-0.163841	0.136963	-1.19624	0.231602	0.521399
ENSG00000283773	0	NA	NA	NA	NA	NA
MST1P2	0	NA	NA	NA	NA	NA
ENSG00000282143	1.90883	0.101966	1.4076	0.0724395	0.942252	NA
RNU1-3	4.21851	-0.796806	1.10417	-0.721635	0.470519	NA
ENSG00000280114	0	NA	NA	NA	NA	NA
EIF1AXP1	0	NA	NA	NA	NA	NA
ESPNP	1.26824	-0.0475407	1.93601	-0.0245561	0.980409	NA
ENSG00000279151	0	NA	NA	NA	NA	NA
ENSG00000282740	0.33865	-1.82273	4.02378	-0.452991	0.650555	NA
CROCC	76.1944	-0.0820762	0.235032	-0.349213	0.72693	0.883153
CROCCP4	0.432492	-0.754135	3.77491	-0.199776	0.841656	NA
RNU1-4	5.71534	-1.49862	1.24635	-1.20241	0.229206	NA
MST1L	53.0768	0.312836	0.310869	1.00633	0.314257	0.608827
ENSG00000223643	0	NA	NA	NA	NA	NA
PDE4DIPP9	0	NA	NA	NA	NA	NA
MIR3675	0	NA	NA	NA	NA	NA
ENSG00000228549	10.0411	0.221204	0.624276	0.354336	0.723087	NA
RNU1-5P	0	NA	NA	NA	NA	NA
ENSG00000238142	21.3548	0.145393	0.454858	0.319644	0.749238	0.895755
ENSG00000235241	0	NA	NA	NA	NA	NA
RNU1-2	6.70487	-0.693676	1.00133	-0.692751	0.488466	NA
ENSG00000272426	0.446008	1.032	3.17117	0.32543	0.744855	NA
MFAP2	113.163	-0.188112	0.361182	-0.520824	0.602489	0.812522
ENSG00000286898	0.112334	1.03349	4.08046	0.253278	0.800054	NA
ENSG00000226526	0	NA	NA	NA	NA	NA
ATP13A2	1113.16	-0.0473451	0.13724	-0.34498	0.73011	0.885263
ENSG00000288636	0	NA	NA	NA	NA	NA
SDHB	1189.62	-0.327384	0.118232	-2.769	0.00562281	0.0711121
PADI2	121.243	0.978203	0.40909	2.39117	0.016795	0.130531
LINC02783	0	NA	NA	NA	NA	NA
ENSG00000282843	0.255933	2.0811	4.02524	0.517011	0.605148	NA
PADI1	94.2814	3.78063	1.39704	2.70618	0.00680621	0.0795578
PADI3	1.11542	2.99672	2.58398	1.15973	0.246158	NA
MIR3972	0	NA	NA	NA	NA	NA
PADI4	0.116193	0	4.08046	0	1	NA
PADI6	0	NA	NA	NA	NA	NA
RCC2-AS1	0	NA	NA	NA	NA	NA
RCC2	4461.39	-0.209689	0.106829	-1.96285	0.0496637	0.231838
ARHGEF10L	65.6617	0.137142	0.30421	0.450814	0.652123	0.842524
LINC02810	0	NA	NA	NA	NA	NA
ACTL8	0.429907	-1.82199	3.7854	-0.48132	0.630289	NA
ENSG00000284653	0	NA	NA	NA	NA	NA
LINC01654	0	NA	NA	NA	NA	NA
IGSF21	0	NA	NA	NA	NA	NA
ENSG00000280222	0	NA	NA	NA	NA	NA
IGSF21-AS1	0	NA	NA	NA	NA	NA
ENSG00000225387	0	NA	NA	NA	NA	NA
KLHDC7A	3.07029	0.0717223	2.3916	0.0299893	0.976076	NA
DYNLL1P3	0	NA	NA	NA	NA	NA
ENSG00000225478	0	NA	NA	NA	NA	NA
PAX7	0	NA	NA	NA	NA	NA
TAS1R2	0	NA	NA	NA	NA	NA
ALDH4A1	1621.81	-0.40578	0.169982	-2.3872	0.0169775	0.131118
MIR4695	0	NA	NA	NA	NA	NA
MIR1290	0	NA	NA	NA	NA	NA
IFFO2	2571.6	0.0108939	0.136641	0.0797267	0.936455	0.977678
ENSG00000272084	3.44466	-1.80033	1.264	-1.4243	0.154358	NA
UBR4	2563.78	0.0925467	0.131093	0.705964	0.480211	0.739137
EMC1-AS1	3.56942	0.115937	1.01513	0.114209	0.909072	NA
EMC1	4060.93	-0.0510404	0.0895797	-0.569777	0.568829	0.792535
MRTO4	1576.43	-0.376106	0.115737	-3.24966	0.00115544	0.0284645
ENSG00000286064	0	NA	NA	NA	NA	NA
AKR7L	10.7876	0.565856	0.632887	0.894087	0.371276	0.65671
AKR7A3	6.12023	-0.0396951	0.826843	-0.0480081	0.96171	NA
ENSG00000270728	0	NA	NA	NA	NA	NA
AKR7A2	1249.76	0.243362	0.111389	2.18479	0.0289043	0.171446
RNU6-1099P	0	NA	NA	NA	NA	NA
SLC66A1	307.828	0.211088	0.179158	1.17823	0.238706	0.529436
CAPZB	5402.76	0.0294749	0.0883449	0.333634	0.738655	0.889591
RN7SL277P	0	NA	NA	NA	NA	NA
MICOS10	1301.95	-0.375078	0.133764	-2.80403	0.00504674	0.0667646
RNU4-28P	0	NA	NA	NA	NA	NA
MICOS10-DT	0	NA	NA	NA	NA	NA
NBL1	165.766	-0.232985	0.348308	-0.668904	0.503556	0.753177
MICOS10-NBL1	15.6374	0.91886	1.27852	0.71869	0.472332	0.733105
ENSG00000226396	0	NA	NA	NA	NA	NA
HTR6	0.209287	0.0717081	4.08046	0.0175735	0.985979	NA
TMCO4	180.56	0.129926	0.169411	0.766927	0.443125	0.712441
RNF186	0.224668	1.91683	4.03928	0.474548	0.635109	NA
RNF186-AS1	0	NA	NA	NA	NA	NA
OTUD3	601.967	0.075152	0.180684	0.415931	0.677461	0.858005
PLA2G2E	0	NA	NA	NA	NA	NA
RN7SL304P	0	NA	NA	NA	NA	NA
PLA2G2A	0	NA	NA	NA	NA	NA
PLA2G5	0	NA	NA	NA	NA	NA
PLA2G2D	1.08317	2.88306	2.50355	1.15159	0.24949	NA
PLA2G2F	9.77424	0.841952	0.769554	1.09408	0.273921	NA
ENSG00000227066	5.92379	-0.163469	1.05313	-0.155222	0.876646	NA
PLA2G2C	0	NA	NA	NA	NA	NA
UBXN10	0.43349	1.51674	3.69434	0.410557	0.681398	NA
LINC01757	0	NA	NA	NA	NA	NA
ENSG00000284710	0	NA	NA	NA	NA	NA
VWA5B1	0	NA	NA	NA	NA	NA
ENSG00000226664	0	NA	NA	NA	NA	NA
LINC01141	0	NA	NA	NA	NA	NA
ENSG00000226487	0	NA	NA	NA	NA	NA
ENSG00000284641	0	NA	NA	NA	NA	NA
ENSG00000284743	0	NA	NA	NA	NA	NA
CAMK2N1	25.4684	0.229344	0.44235	0.518467	0.604132	0.813464
ENSG00000289402	0	NA	NA	NA	NA	NA
MUL1	798.092	-0.0596822	0.119206	-0.500664	0.616607	0.820166
RPS4XP4	0	NA	NA	NA	NA	NA
FAM43B	0.111108	0	4.08046	0	1	NA
CDA	15.3806	1.68844	0.836204	2.01918	0.0434687	0.215842
PINK1	566.404	0.0447561	0.12879	0.347513	0.728206	0.88415
MIR6084	0	NA	NA	NA	NA	NA
PINK1-AS	234.274	0.0362252	0.154042	0.235165	0.814081	0.92498
DDOST	10007.9	-0.0132195	0.0799777	-0.16529	0.868716	0.949987
KIF17	75.7826	1.02864	0.428885	2.39841	0.0164662	0.12914
ENSG00000235432	0	NA	NA	NA	NA	NA
SH2D5	363.515	-0.142582	0.307078	-0.464318	0.64242	0.835968
ENSG00000233069	0	NA	NA	NA	NA	NA
HP1BP3	4671.41	0.174049	0.118529	1.46841	0.141992	0.404297
EIF4G3	1871.62	-0.0952241	0.100364	-0.948791	0.342727	0.633849
RNU7-200P	0	NA	NA	NA	NA	NA
MIR1256	0	NA	NA	NA	NA	NA
RPS15AP6	0	NA	NA	NA	NA	NA
ENSG00000236073	0	NA	NA	NA	NA	NA
HSPE1P27	0	NA	NA	NA	NA	NA
ENSG00000287192	0.334368	-0.890041	4.08046	-0.218123	0.827333	NA
ECE1	2356.36	1.47978	0.285973	5.17455	2.28456e-07	8.81241e-05
ENSG00000236936	0	NA	NA	NA	NA	NA
ECE1-AS1	0.546568	0.956758	3.06467	0.312189	0.754897	NA
PPP1R11P1	0	NA	NA	NA	NA	NA
PDE4DIPP10	0	NA	NA	NA	NA	NA
ENSG00000236009	0	NA	NA	NA	NA	NA
NBPF2P	0	NA	NA	NA	NA	NA
HS6ST1P1	0	NA	NA	NA	NA	NA
CROCCP5	0	NA	NA	NA	NA	NA
NBPF3	463.54	0.324108	0.120745	2.68423	0.0072698	0.0826693
PFN1P10	0	NA	NA	NA	NA	NA
ALPL	1166.65	-0.352646	0.597236	-0.590463	0.55488	0.784097
ENSG00000289715	0	NA	NA	NA	NA	NA
LINC02596	0	NA	NA	NA	NA	NA
RAP1GAP	727.75	-0.0748149	0.487287	-0.153534	0.877977	0.955537
USP48	2908.57	0.0615282	0.0825425	0.745413	0.456022	0.720441
ENSG00000231978	0	NA	NA	NA	NA	NA
LDLRAD2	4.33922	0.339935	0.968385	0.351033	0.725564	NA
HSPG2	888.694	1.1919	0.575936	2.06951	0.0384987	0.201405
ENSG00000232037	0	NA	NA	NA	NA	NA
ENSG00000283234	0.111108	0	4.08046	0	1	NA
CELA3B	0	NA	NA	NA	NA	NA
ENSG00000285959	0.203541	1.79369	4.05087	0.442792	0.657916	NA
RN7SL386P	0	NA	NA	NA	NA	NA
RNU6-1022P	0	NA	NA	NA	NA	NA
CELA3A	0	NA	NA	NA	NA	NA
RN7SL186P	0	NA	NA	NA	NA	NA
RNU6-776P	0	NA	NA	NA	NA	NA
LINC01635	0.209499	-1.74756	4.04132	-0.432422	0.665435	NA
LINC00339	244.739	-0.237911	0.147979	-1.60774	0.107893	0.34781
ENSG00000289694	6010.43	0.209915	0.0892024	2.35324	0.0186104	0.137081
CDC42-AS1	15.3895	-0.666267	0.568204	-1.17258	0.240962	0.532078
ENSG00000285794	0	NA	NA	NA	NA	NA
CDC42	8059.87	0.131421	0.0921715	1.42583	0.153918	0.419311
CDC42-IT1	0.101771	1.03349	4.08046	0.253278	0.800054	NA
MPHOSPH6P1	0	NA	NA	NA	NA	NA
WNT4	28.5668	0.549598	0.437658	1.25577	0.2092	0.492998
ENSG00000285873	0.316087	0.894456	4.04486	0.221134	0.824988	NA
MIR4418	0	NA	NA	NA	NA	NA
PPIAP34	0	NA	NA	NA	NA	NA
ENSG00000279625	0	NA	NA	NA	NA	NA
ZBTB40	1257.89	0.0821848	0.121639	0.675644	0.499267	0.751056
ZBTB40-IT1	0.203753	0.0717081	4.08046	0.0175735	0.985979	NA
EPHA8	1.37175	1.82978	2.48851	0.73529	0.462163	NA
MIR6127	0	NA	NA	NA	NA	NA
C1QA	0.101771	1.03349	4.08046	0.253278	0.800054	NA
ENSG00000289692	0	NA	NA	NA	NA	NA
C1QC	0	NA	NA	NA	NA	NA
C1QB	0	NA	NA	NA	NA	NA
EPHB2	25.6897	0.299445	0.551595	0.542871	0.587219	0.803299
MIR4684	0	NA	NA	NA	NA	NA
ENSG00000225952	0	NA	NA	NA	NA	NA
MIR4253	0	NA	NA	NA	NA	NA
LACTBL1	0	NA	NA	NA	NA	NA
TEX46	0	NA	NA	NA	NA	NA
KDM1A	3557.6	-0.0148057	0.130327	-0.113604	0.909551	0.966339
ENSG00000240553	0	NA	NA	NA	NA	NA
MIR3115	0	NA	NA	NA	NA	NA
ENSG00000266802	0	NA	NA	NA	NA	NA
LUZP1	1347.77	0.140737	0.138711	1.01461	0.310292	0.604523
ENSG00000229010	0	NA	NA	NA	NA	NA
RNU6-514P	0	NA	NA	NA	NA	NA
RNU6-135P	0	NA	NA	NA	NA	NA
ENSG00000289014	0	NA	NA	NA	NA	NA
HTR1D	21.3845	-0.411316	0.493649	-0.833217	0.404723	0.684656
ENSG00000215381	0	NA	NA	NA	NA	NA
LINC01355	32.0489	-0.162095	0.342985	-0.472601	0.636498	0.832719
ENSG00000284726	1.82012	1.02788	1.59267	0.645383	0.518679	NA
HNRNPR	12402.7	-0.0162027	0.0886566	-0.182758	0.854988	0.942141
ZNF436	1022.3	0.346218	0.163786	2.11385	0.0345284	0.190269
ZNF436-AS1	75.0308	-0.118582	0.241769	-0.490476	0.623797	0.825087
Y_RNA_5	0	NA	NA	NA	NA	NA
ENSG00000271420	0.107516	-0.890057	4.08046	-0.218127	0.82733	NA
TCEA3	131.238	0.00874392	0.347375	0.0251714	0.979918	0.993611
ENSG00000232482	0	NA	NA	NA	NA	NA
ASAP3	681.554	-0.491484	0.193568	-2.53908	0.0111145	0.104972
E2F2	478.337	-0.000370443	0.126596	-0.00292619	0.997665	0.99912
ENSG00000235052	0.407295	1.41035	4.00387	0.352247	0.724653	NA
ID3	2330.57	-0.217049	0.232772	-0.932455	0.351101	0.642019
ENSG00000285802	0.753789	-2.39605	2.57928	-0.928962	0.352909	NA
MDS2	4.25461	0.390756	1.16191	0.336306	0.73664	NA
ENSG00000229239	0	NA	NA	NA	NA	NA
RPL11	21399.9	0.0810015	0.0734043	1.1035	0.269811	0.563635
ELOA-AS1	22.2433	-0.0860157	0.654883	-0.131345	0.895502	0.960295
ELOA	2144.6	-0.0915157	0.109495	-0.835796	0.40327	0.683368
PITHD1	1402.24	-0.0488526	0.108055	-0.452108	0.651191	0.841873
LYPLA2	1461.82	-0.0714843	0.106356	-0.672121	0.501506	0.752337
GALE	609.484	0.459351	0.212376	2.16291	0.0305478	0.177334
HMGCL	414.2	0.400602	0.175995	2.27621	0.0228334	0.152064
FUCA1	1251.66	0.8246	0.225457	3.65747	0.000254719	0.0107289
CNR2	0.203541	1.79369	4.05087	0.442792	0.657916	NA
BTBD6P1	0	NA	NA	NA	NA	NA
ENSG00000232557	0	NA	NA	NA	NA	NA
MIR378F	0	NA	NA	NA	NA	NA
H3P1	0	NA	NA	NA	NA	NA
PNRC2	7300.91	0.117466	0.0909947	1.29091	0.196733	0.476726
SRSF10	3678.98	-0.145368	0.099217	-1.46515	0.14288	0.405621
ENSG00000215905	0	NA	NA	NA	NA	NA
ENSG00000225315	0.107516	-0.890057	4.08046	-0.218127	0.82733	NA
MYOM3	0	NA	NA	NA	NA	NA
MYOM3-AS1	0	NA	NA	NA	NA	NA
IL22RA1	0.576473	-1.45733	2.93456	-0.49661	0.619464	NA
IFNLR1	97.4185	0.438421	0.273015	1.60585	0.108307	0.348149
GRHL3	838.514	0.170715	0.16248	1.05068	0.293404	0.587609
LINC02800	0	NA	NA	NA	NA	NA
GRHL3-AS1	0.103725	0	4.08046	0	1	NA
STPG1	130.669	0.0895768	0.215342	0.415975	0.677428	0.858005
NIPAL3	412.125	0.203278	0.133067	1.52764	0.126602	0.379131
ENSG00000288982	0.3591	0.0717156	3.98003	0.0180188	0.985624	NA
RCAN3AS	0.360352	1.0335	4.08046	0.253282	0.800051	NA
RCAN3	668.666	0.326138	0.144515	2.25677	0.0240222	0.155666
NCMAP-DT	0	NA	NA	NA	NA	NA
NCMAP	11.7827	0.605582	0.541575	1.11819	0.263488	0.555313
ENSG00000227312	0	NA	NA	NA	NA	NA
Y_RNA_6	0	NA	NA	NA	NA	NA
SRRM1	4016.13	-0.0222883	0.0886855	-0.251318	0.801568	0.919393
ENSG00000284699	0	NA	NA	NA	NA	NA
CLIC4	18591.5	0.163086	0.143948	1.13295	0.257235	0.549777
RNU6-1208P	0	NA	NA	NA	NA	NA
RUNX3	3.24807	0.140089	1.2031	0.11644	0.907303	NA
MIR6731	0	NA	NA	NA	NA	NA
RUNX3-AS1	0.114941	-0.890057	4.08046	-0.218127	0.82733	NA
ENSG00000261025	0	NA	NA	NA	NA	NA
MIR4425	0	NA	NA	NA	NA	NA
LINC02793	0	NA	NA	NA	NA	NA
ENSG00000233755	0	NA	NA	NA	NA	NA
IFITM3P7	0	NA	NA	NA	NA	NA
ENSG00000231953	0.324199	-0.890041	4.08046	-0.218123	0.827333	NA
SYF2	1402.01	0.0951634	0.0976098	0.974937	0.329592	0.6228
ENSG00000284602	8.10499	-1.44888	0.740711	-1.95607	0.0504568	NA
ENSG00000284657	0.771949	1.02093	2.52675	0.404049	0.686177	NA
RSRP1	475.371	0.419854	0.161621	2.59776	0.00938334	0.09525
ENSG00000272432	0.528044	-1.40338	3.58035	-0.391969	0.695081	NA
ENSG00000261349	0	NA	NA	NA	NA	NA
RHD	1.52409	1.37761	1.83702	0.749918	0.453304	NA
SDHDP6	0	NA	NA	NA	NA	NA
ENSG00000259984	0	NA	NA	NA	NA	NA
TMEM50A	1584.68	0.119399	0.128026	0.932617	0.351018	0.642019
RHCE	1.36405	2.06378	1.9031	1.08443	0.278174	NA
ENSG00000238084	0	NA	NA	NA	NA	NA
MACO1	475.941	0.183643	0.13869	1.32413	0.185461	0.461679
LDLRAP1	1700.92	-0.180873	0.211463	-0.855342	0.392362	0.674632
ENSG00000225643	0.412828	1.41035	4.00387	0.352247	0.724653	NA
MAN1C1	1861.41	0.970241	0.450928	2.15165	0.0314246	0.180282
ENSG00000233478	6.9972	0.168106	0.894225	0.187991	0.850884	NA
SELENON	3557.93	-0.0217852	0.116825	-0.186477	0.852071	0.940913
ENSG00000255054	0.561851	1.03351	3.5509	0.291056	0.771008	NA
ENSG00000228172	12.0662	-0.204723	0.644499	-0.317646	0.750753	0.896574
MTFR1L	1125.42	0.0972513	0.101505	0.95809	0.338017	0.629504
ENSG00000272478	0	NA	NA	NA	NA	NA
AUNIP	559.52	-0.146296	0.123433	-1.18522	0.235929	0.526809
ENSG00000236528	1.76198	0.0485395	2.20391	0.0220242	0.982429	NA
PAQR7	535.969	0.379087	0.256409	1.47845	0.139288	0.399547
Y_RNA_7	0	NA	NA	NA	NA	NA
STMN1	3507.9	0.104834	0.16792	0.624308	0.532425	0.771404
SNRPFP2	0	NA	NA	NA	NA	NA
ENSG00000223624	0	NA	NA	NA	NA	NA
MIR3917	0	NA	NA	NA	NA	NA
PAFAH2	635.728	-0.11394	0.104595	-1.08934	0.276003	0.569835
RNU6-110P	0	NA	NA	NA	NA	NA
ENSG00000252190	0	NA	NA	NA	NA	NA
ENSG00000252691	0	NA	NA	NA	NA	NA
EXTL1	55.3329	1.08249	0.470396	2.30123	0.0213785	0.147051
SLC30A2	852.785	-0.564239	0.231012	-2.44247	0.0145873	0.121145
ENSG00000284309	18.537	-0.0277689	0.554361	-0.0500917	0.960049	0.986708
TRIM63	24.6039	1.2379	0.601078	2.05947	0.0394497	0.204462
PDIK1L	266.509	-0.101928	0.153803	-0.662722	0.507509	0.756301
FAM110D	0.314649	1.7937	4.05087	0.442794	0.657915	NA
C1orf232	0	NA	NA	NA	NA	NA
ZNF593OS	5.28089	-1.41536	1.17144	-1.20821	0.226965	NA
ZNF593	303.661	-0.346371	0.14627	-2.36803	0.0178831	0.13407
CNKSR1	325.478	0.0146567	0.199645	0.0734137	0.941477	0.979986
CATSPER4	0.226049	-0.890049	4.08046	-0.218125	0.827332	NA
ZPLD2P	27.9587	-0.0463611	0.419669	-0.110471	0.912036	0.967339
ENSG00000278572	0	NA	NA	NA	NA	NA
CEP85	3274.61	0.0679862	0.226681	0.299921	0.764238	0.902469
ENSG00000270733	0	NA	NA	NA	NA	NA
SH3BGRL3	510.157	0.128557	0.122666	1.04802	0.294628	0.589095
UBXN11	190.365	-0.26902	0.201655	-1.33406	0.182184	0.458212
CD52	1.54831	1.00916	1.79183	0.563202	0.573297	NA
CRYBG2	3022.96	-0.0675879	0.192704	-0.350734	0.725788	0.882652
ENSG00000225854	0	NA	NA	NA	NA	NA
ZNF683	0.342242	-0.890041	4.05643	-0.219415	0.826327	NA
LIN28A	4.57056	-1.16914	1.23136	-0.949469	0.342382	NA
DHDDS	843.39	-0.171015	0.0957385	-1.78627	0.0740552	0.284088
ENSG00000223583	0	NA	NA	NA	NA	NA
DHDDS-AS1	1.42259	-1.0011	1.72046	-0.581883	0.560646	NA
HMGN2	9038.05	-0.348286	0.123946	-2.80998	0.00495448	0.0658916
DPPA2P2	0	NA	NA	NA	NA	NA
RPS6KA1	792.552	0.0156938	0.133924	0.117185	0.906714	0.965121
MIR1976	0	NA	NA	NA	NA	NA
RN7SL679P	0	NA	NA	NA	NA	NA
Y_RNA_8	0	NA	NA	NA	NA	NA
RNU7-29P	0	NA	NA	NA	NA	NA
ENSG00000289452	0	NA	NA	NA	NA	NA
ENSG00000229247	0	NA	NA	NA	NA	NA
ENSG00000238316	0	NA	NA	NA	NA	NA
ENSG00000235069	0	NA	NA	NA	NA	NA
ENSG00000260063	4.07956	-2.23411	1.15266	-1.93822	0.0525963	NA
ARID1A	2429.27	0.0564025	0.110969	0.508272	0.611263	0.817466
PIGV	352.424	0.0920618	0.117667	0.782393	0.433984	0.705952
RN7SL165P	0	NA	NA	NA	NA	NA
ENSG00000287810	0	NA	NA	NA	NA	NA
ZDHHC18	1496.12	-0.00956377	0.0827077	-0.115633	0.907943	0.965723
SFN	189.785	0.790033	0.453239	1.74308	0.0813192	0.298966
GPN2	532.482	-0.0127128	0.10485	-0.121248	0.903495	0.964058
ENSG00000226698	0	NA	NA	NA	NA	NA
ENSG00000289554	38.8231	0.0786449	0.368654	0.21333	0.83107	0.933326
GPATCH3	421.327	-0.123141	0.17632	-0.698397	0.484929	0.742127
NUDC	2511.9	-0.321952	0.112354	-2.86553	0.00416314	0.0602997
NR0B2	0.547696	0.0717188	3.08917	0.0232162	0.981478	NA
KDF1	193.027	0.145031	0.188211	0.770576	0.440958	0.710791
RPL12P13	0	NA	NA	NA	NA	NA
RPL32P6	0	NA	NA	NA	NA	NA
OSTCP2	0	NA	NA	NA	NA	NA
TRNP1	27.0632	0.0723118	0.463672	0.155955	0.876069	0.954853
TENT5B	219.728	0.195434	0.248525	0.786373	0.431649	0.704421
SLC9A1	4085.53	-0.238735	0.120738	-1.97729	0.0480086	0.227664
ENSG00000229985	0	NA	NA	NA	NA	NA
CHCHD3P3	0	NA	NA	NA	NA	NA
NPM1P39	0	NA	NA	NA	NA	NA
SNRPEP7	0	NA	NA	NA	NA	NA
WDTC1-DT	0	NA	NA	NA	NA	NA
WDTC1	620.43	0.271999	0.165939	1.63915	0.101182	0.335095
Y_RNA_9	0	NA	NA	NA	NA	NA
ENSG00000243659	0	NA	NA	NA	NA	NA
TMEM222	450.473	-0.135656	0.132875	-1.02093	0.307288	0.601542
RNU6-48P	0	NA	NA	NA	NA	NA
ACTG1P20	0	NA	NA	NA	NA	NA
SYTL1	121.567	0.335095	0.291171	1.15085	0.249793	0.54247
MAP3K6	103.233	-0.312465	0.285684	-1.09374	0.274068	0.568281
FCN3	0.342799	1.0335	4.04039	0.255793	0.79811	NA
CD164L2	4.74002	0.0555941	0.974662	0.0570393	0.954514	NA
ENSG00000231207	0	NA	NA	NA	NA	NA
GPR3	13.8649	-0.850496	0.54897	-1.54926	0.12132	0.370519
WASF2	4408.66	0.427684	0.14481	2.95342	0.00314277	0.0511574
ENSG00000241169	0	NA	NA	NA	NA	NA
ENSG00000237429	0	NA	NA	NA	NA	NA
AHDC1	250.266	0.609528	0.25428	2.39708	0.0165265	0.129336
FGR	0	NA	NA	NA	NA	NA
ENSG00000235912	0	NA	NA	NA	NA	NA
LINC02574	14.9376	-0.596679	0.521416	-1.14434	0.252482	0.544888
IFI6	10816.9	0.386908	0.187718	2.06111	0.0392926	0.203985
ENSG00000225886	10.931	-0.0122956	0.85993	-0.0142984	0.988592	0.996139
RNU6-949P	0	NA	NA	NA	NA	NA
CHMP1AP1	0	NA	NA	NA	NA	NA
RNU6-424P	0	NA	NA	NA	NA	NA
ENSG00000287244	0	NA	NA	NA	NA	NA
FAM76A	500.76	-0.00510714	0.199828	-0.0255576	0.97961	0.993558
ENSG00000231344	0	NA	NA	NA	NA	NA
RPEP3	0	NA	NA	NA	NA	NA
STX12	1349.99	0.0533487	0.0938485	0.568456	0.569725	0.792845
ENSG00000269971	0.114941	-0.890057	4.08046	-0.218127	0.82733	NA
ENSG00000270031	0.222216	0	4.08046	0	1	NA
RNU6-1245P	0	NA	NA	NA	NA	NA
ENSG00000286433	0.239074	1.0335	4.08046	0.25328	0.800052	NA
PPP1R8	1701.74	-0.0493628	0.0803051	-0.614691	0.538759	0.774984
SCARNA1	0.537697	2.37215	4.00387	0.592463	0.553541	NA
THEMIS2	51.591	-0.111238	0.315258	-0.352847	0.724203	0.881374
RPA2	1328.25	-0.166266	0.0957815	-1.73589	0.0825841	0.301199
SMPDL3B	91.2701	-0.217441	0.355764	-0.611194	0.541071	0.776393
ENSG00000227050	0	NA	NA	NA	NA	NA
XKR8	487.663	0.188384	0.182018	1.03497	0.300683	0.595018
EYA3	1594.15	0.0876839	0.114719	0.764335	0.444668	0.71324
ENSG00000238231	0	NA	NA	NA	NA	NA
RN7SL559P	0.114941	-0.890057	4.08046	-0.218127	0.82733	NA
SPCS2P4	0	NA	NA	NA	NA	NA
ENSG00000228943	0	NA	NA	NA	NA	NA
ENSG00000289576	0	NA	NA	NA	NA	NA
ENSG00000214812	0	NA	NA	NA	NA	NA
RNU6-176P	0	NA	NA	NA	NA	NA
PTAFR	48.5312	0.140349	0.531491	0.264067	0.791728	0.915428
DNAJC8	3803.49	0.103075	0.0721625	1.42837	0.153184	0.418367
ATP5IF1	893.945	-0.0436334	0.109752	-0.397565	0.690951	0.86512
ENSG00000270605	60.1265	-0.19421	0.256794	-0.756287	0.449477	0.715512
ENSG00000271398	0.103725	0	4.08046	0	1	NA
SESN2	1111.34	0.203036	0.177924	1.14114	0.253813	0.545773
MED18	426.48	-0.0439181	0.131921	-0.332912	0.739201	0.889882
PHACTR4	1154.18	0.210894	0.132712	1.58911	0.112035	0.354614
Y_RNA_10	0	NA	NA	NA	NA	NA
ENSG00000229820	0	NA	NA	NA	NA	NA
RNU6ATAC27P	0	NA	NA	NA	NA	NA
RCC1	3117.65	-0.166969	0.0939434	-1.77734	0.0755125	0.286913
SNHG3	1000.88	-0.500069	0.129195	-3.87064	0.000108549	0.0060025
SNORA73A	0	NA	NA	NA	NA	NA
SNORA73B	3.37999	-1.07492	1.283	-0.837813	0.402136	NA
PRDX3P2	0	NA	NA	NA	NA	NA
ENSG00000279443	0	NA	NA	NA	NA	NA
TRNAU1AP	434.817	0.112837	0.120604	0.935602	0.349478	0.640972
SNHG12	619.423	-0.371888	0.148731	-2.50041	0.012405	0.111966
SNORD99	0	NA	NA	NA	NA	NA
SNORA61	0	NA	NA	NA	NA	NA
SNORA44	0	NA	NA	NA	NA	NA
SNORA16A_1	0	NA	NA	NA	NA	NA
SNORA16A_2	0	NA	NA	NA	NA	NA
TAF12	735.601	-0.030295	0.113147	-0.267748	0.788893	0.913974
RAB42	8.29766	-0.184201	0.79861	-0.230652	0.817585	NA
TAF12-DT	0.670819	-0.524922	2.47284	-0.212275	0.831893	NA
ENSG00000270103	2.35965	1.41397	1.80665	0.782645	0.433835	NA
RNU11	0.784928	-1.71473	3.95468	-0.433595	0.664583	NA
GMEB1	880.466	0.0448792	0.140215	0.320074	0.748912	0.895755
ENSG00000252777	0	NA	NA	NA	NA	NA
ENSG00000289291	53.8552	-0.156615	0.303755	-0.515598	0.606136	0.814366
YTHDF2	5678.5	0.101205	0.0968826	1.04462	0.296199	0.590867
OPRD1	7.12878	-0.532498	0.838566	-0.635011	0.525421	NA
ENSG00000233427	0.329973	-2.39471	3.99321	-0.599696	0.548709	NA
Y_RNA_11	0	NA	NA	NA	NA	NA
EPB41	1165.6	0.150259	0.109211	1.37586	0.168866	0.441123
ENSG00000225616	0	NA	NA	NA	NA	NA
Y_RNA_12	0	NA	NA	NA	NA	NA
Metazoa_SRP_1	0	NA	NA	NA	NA	NA
TMEM200B	9.3837	0.499774	0.708162	0.705734	0.480353	NA
ENSG00000225750	0	NA	NA	NA	NA	NA
SRSF4	2754.37	0.0136381	0.0904192	0.150832	0.880108	0.956216
ENSG00000277916	0	NA	NA	NA	NA	NA
MECR	430.874	-0.242891	0.138668	-1.7516	0.0798427	0.295688
ENSG00000237934	0.423815	-1.35828	3.71901	-0.365227	0.714942	NA
PTPRU	2780.49	0.374849	0.136142	2.75337	0.0058985	0.0726175
LINC01756	0	NA	NA	NA	NA	NA
ENSG00000225011	0	NA	NA	NA	NA	NA
ENSG00000228176	0	NA	NA	NA	NA	NA
ENSG00000284676	0	NA	NA	NA	NA	NA
ENSG00000270927	0	NA	NA	NA	NA	NA
LINC01648	0	NA	NA	NA	NA	NA
ENSG00000233372	0	NA	NA	NA	NA	NA
ENSG00000231251	0	NA	NA	NA	NA	NA
ENSG00000236335	0	NA	NA	NA	NA	NA
ENSG00000231949	0	NA	NA	NA	NA	NA
ENSG00000289710	0	NA	NA	NA	NA	NA
MATN1	1.06172	0.64044	2.66004	0.240763	0.809738	NA
MATN1-AS1	11.3408	-0.720464	0.658832	-1.09355	0.274154	0.568313
ENSG00000287510	0.232385	0	4.08046	0	1	NA
LAPTM5	1.86167	0.777284	1.52929	0.508264	0.611268	NA
MIR4420	0	NA	NA	NA	NA	NA
ENSG00000229607	0	NA	NA	NA	NA	NA
LINC01778	0.116193	0	4.08046	0	1	NA
RN7SKP91	0	NA	NA	NA	NA	NA
ENSG00000235143	0	NA	NA	NA	NA	NA
SDC3	1207.61	-0.379589	0.177258	-2.14145	0.0322375	0.183607
RN7SL371P	0	NA	NA	NA	NA	NA
PUM1	4119.41	0.0518413	0.0821496	0.631061	0.528001	0.768893
ENSG00000237329	0	NA	NA	NA	NA	NA
ENSG00000232768	0	NA	NA	NA	NA	NA
SELENOWP1	0	NA	NA	NA	NA	NA
ENSG00000225142	0	NA	NA	NA	NA	NA
NKAIN1	11.3138	-0.745575	0.668261	-1.11569	0.264553	0.556518
SNRNP40	1850.16	-0.0650449	0.115281	-0.564231	0.572597	0.794867
ENSG00000229447	0	NA	NA	NA	NA	NA
ZCCHC17	801.801	-0.190217	0.0957117	-1.9874	0.0468782	0.224556
ENSG00000229044	0	NA	NA	NA	NA	NA
FABP3	7.06554	-0.643182	0.910578	-0.706345	0.479974	NA
SERINC2	1625.02	-0.277571	0.182623	-1.51991	0.128534	0.382237
ENSG00000215899	0	NA	NA	NA	NA	NA
RNU6-40P	0	NA	NA	NA	NA	NA
LDC1P	0	NA	NA	NA	NA	NA
Y_RNA_13	0	NA	NA	NA	NA	NA
LINC01226	1.68841	0.41567	1.73182	0.240019	0.810316	NA
ENSG00000229167	5.32066	-0.470324	0.846559	-0.555571	0.578504	NA
TINAGL1	3931.81	-0.080358	0.187813	-0.427862	0.668752	0.8521
HCRTR1	1.63552	-1.7971	1.88399	-0.953881	0.340144	NA
PEF1	1299.92	-0.146	0.118809	-1.22887	0.219121	0.505808
PEF1-AS1	4.58233	1.07562	1.1805	0.911159	0.362212	NA
ENSG00000264078	0.571953	0.592033	2.88942	0.204897	0.837652	NA
COL16A1	34.0755	0.00534342	0.513716	0.0104015	0.991701	0.997212
ADGRB2	234.08	-0.431463	0.255224	-1.69052	0.0909278	0.316735
MIR4254	0	NA	NA	NA	NA	NA
ENSG00000254545	0	NA	NA	NA	NA	NA
SPOCD1	7.75478	0.796714	0.78707	1.01225	0.311417	NA
ENSG00000203620	0.762811	-1.45293	2.49593	-0.582118	0.560487	NA
ENSG00000269967	0	NA	NA	NA	NA	NA
PTP4A2	4891.15	0.172221	0.107456	1.60272	0.108997	0.349371
ENSG00000288678	0	NA	NA	NA	NA	NA
ENSG00000228634	0	NA	NA	NA	NA	NA
ENSG00000284702	0.127966	1.03349	4.08046	0.253278	0.800054	NA
KHDRBS1	6566.82	-0.130686	0.0953728	-1.37026	0.170604	0.443593
ENSG00000203325	1.21357	0.365735	1.8993	0.192563	0.847301	NA
TMEM39B	258.658	-0.0496713	0.137599	-0.360987	0.718109	0.878048
MIR5585	0	NA	NA	NA	NA	NA
Metazoa_SRP_2	0	NA	NA	NA	NA	NA
KPNA6	6376.32	0.0387889	0.121235	0.319947	0.749009	0.895755
ENSG00000250135	0.530105	-2.74598	3.43624	-0.799123	0.424219	NA
TXLNA	1872	-0.172111	0.0771828	-2.22991	0.0257532	0.161389
CCDC28B	34.0937	0.0573318	0.423644	0.13533	0.892351	0.95976
ENSG00000224066	0.449491	0.0717211	3.78521	0.0189477	0.984883	NA
IQCC	54.1156	0.119095	0.273018	0.436219	0.662678	0.848492
DCDC2B	0.103725	0	4.08046	0	1	NA
TMEM234	70.5847	-0.185854	0.239249	-0.776821	0.437264	0.707754
EIF3I	4581.21	-0.233236	0.101602	-2.29559	0.0216992	0.148115
MTMR9LP	10.4018	0.402421	0.646721	0.622248	0.533779	NA
FAM167B	0.423815	-1.35828	3.71901	-0.365227	0.714942	NA
LCK	26.1546	-5.78494	2.46727	-2.34467	NA	NA
Metazoa_SRP_3	0	NA	NA	NA	NA	NA
Y_RNA_14	0	NA	NA	NA	NA	NA
HDAC1	3752.63	-0.0928952	0.115733	-0.802671	0.422165	0.696608
MARCKSL1	1035.05	-0.457193	0.219912	-2.07898	0.0376191	0.199445
ENSG00000233775	0	NA	NA	NA	NA	NA
TSSK3	2.78583	3.2228	1.68121	1.91695	0.0552439	NA
FAM229A	37.2684	-0.296827	0.401362	-0.739549	0.459573	0.723491
BSDC1	1693.06	0.0241616	0.128565	0.187933	0.850929	0.940571
GAPDHP20	0	NA	NA	NA	NA	NA
ENSG00000270850	0	NA	NA	NA	NA	NA
LRRC37A12P	0	NA	NA	NA	NA	NA
RN7SL122P	0	NA	NA	NA	NA	NA
ENSG00000254553	9.79974	0.141826	1.11758	0.126905	0.899016	NA
ZBTB8B	73.8376	0.364061	0.268902	1.35388	0.175774	0.449886
ZBTB8A	124.983	-0.04621	0.213554	-0.216385	0.828687	0.932055
ZBTB8OS	439.367	-0.249542	0.160403	-1.55573	0.119773	0.367839
Y_RNA_15	0	NA	NA	NA	NA	NA
RBBP4	4621.67	-0.221482	0.116101	-1.90767	0.0564339	0.24634
SYNC	344.687	0.0828081	0.14161	0.584763	0.558707	0.786743
ENSG00000224409	0	NA	NA	NA	NA	NA
KIAA1522	1224.89	0.523486	0.206807	2.53128	0.0113648	0.10675
YARS1	3537.24	-0.620443	0.16024	-3.87197	0.000107961	0.00599428
S100PBP	781.921	0.0654402	0.188651	0.346884	0.728678	0.884406
FNDC5	3.12675	0.188501	1.61867	0.116455	0.907292	NA
HPCA	2.11898	-1.24319	1.67294	-0.743118	0.457411	NA
TMEM54	349.02	-0.207212	0.137772	-1.50402	0.132576	0.388659
ENSG00000287691	0.112334	1.03349	4.08046	0.253278	0.800054	NA
RNF19B	1285.08	-0.359265	0.145898	-2.46244	0.0137996	0.118015
ENSG00000278966	0	NA	NA	NA	NA	NA
ENSG00000217644	0	NA	NA	NA	NA	NA
ENSG00000239670	0	NA	NA	NA	NA	NA
ENSG00000236065	0.413464	-2.72703	3.97558	-0.685947	0.492747	NA
AK2	4933.63	-0.254697	0.12742	-1.99888	0.0456213	0.22121
Metazoa_SRP_4	0	NA	NA	NA	NA	NA
AZIN2	28.6894	0.0458862	0.381031	0.120426	0.904145	0.964132
ENSG00000278997	0	NA	NA	NA	NA	NA
TRIM62	241.257	-0.235575	0.198218	-1.18846	0.234652	0.525153
ENSG00000279179	0	NA	NA	NA	NA	NA
ENSG00000284721	0	NA	NA	NA	NA	NA
ZNF362	506.41	0.0846879	0.191531	0.442164	0.65837	0.845549
ENSG00000270115	0.775732	0.62429	2.21123	0.282328	0.777692	NA
A3GALT2	0	NA	NA	NA	NA	NA
ENSG00000225313	11.0579	0.0667563	0.600171	0.111229	0.911435	0.967135
PHC2	1413.76	0.159188	0.101151	1.57376	0.115543	0.36098
MIR3605	0	NA	NA	NA	NA	NA
RN7SKP16	0.337003	2.50104	3.99567	0.625937	0.531356	NA
PHC2-AS1	0.114941	-0.890057	4.08046	-0.218127	0.82733	NA
TLR12P	0	NA	NA	NA	NA	NA
ZSCAN20	147.233	0.452632	0.266434	1.69885	0.0893469	0.313593
ENSG00000235907	0	NA	NA	NA	NA	NA
CSMD2	0	NA	NA	NA	NA	NA
HSPD1P14	0	NA	NA	NA	NA	NA
HMGB4	0	NA	NA	NA	NA	NA
CSMD2-AS1	0	NA	NA	NA	NA	NA
RNA5SP42	0	NA	NA	NA	NA	NA
C1orf94	0	NA	NA	NA	NA	NA
ENSG00000270241	0	NA	NA	NA	NA	NA
ENSG00000287703	0	NA	NA	NA	NA	NA
MIR552	0	NA	NA	NA	NA	NA
SMIM12	792.61	-0.259692	0.14341	-1.81083	0.0701668	0.276257
GJB5	10.8375	0.904697	0.871468	1.03813	0.29921	0.593159
GJB4	6.48839	0.841103	0.893577	0.941276	0.346564	NA
ENSG00000255811	0.111108	0	4.08046	0	1	NA
GJB3	9.39996	0.25878	1.02916	0.251449	0.801467	NA
GJA4	0.437881	1.03351	3.78406	0.273121	0.78476	NA
ENSG00000230163	0	NA	NA	NA	NA	NA
DLGAP3	1.11227	0.432008	1.70489	0.253394	0.799964	NA
ENSG00000284773	11.7281	0.0764075	0.698585	0.109375	0.912905	0.967701
GPR199P	2.00277	-3.33047	2.87857	-1.15699	0.247277	NA
ENSG00000271741	62.1141	0.283801	0.306961	0.924552	0.355199	0.644689
TMEM35B	114.631	-0.403492	0.267895	-1.50616	0.132026	0.387707
ZMYM6	264.331	-0.0293773	0.173582	-0.169241	0.865607	0.948499
ZMYM1	720.073	0.0257318	0.127707	0.201492	0.840314	0.936472
RPL12P45	0	NA	NA	NA	NA	NA
EFCAB14P1	0	NA	NA	NA	NA	NA
ENSG00000284640	1.54254	-0.560243	1.70589	-0.328417	0.742597	NA
SFPQ	11050.6	-0.213279	0.0766327	-2.78313	0.00538373	0.0694061
Y_RNA_16	0	NA	NA	NA	NA	NA
ZMYM4	2172.73	0.122097	0.105372	1.15872	0.246569	0.53847
RN7SL503P	0	NA	NA	NA	NA	NA
SNORA62_1	0	NA	NA	NA	NA	NA
RPL5P4	0	NA	NA	NA	NA	NA
ZMYM4-AS1	0.621823	0.0495462	3.32465	0.0149026	0.98811	NA
Metazoa_SRP_5	0	NA	NA	NA	NA	NA
KIAA0319L	2495.22	0.190169	0.0843748	2.25386	0.0242052	0.156247
ENSG00000236274	0	NA	NA	NA	NA	NA
NCDN	376.356	-0.372266	0.203422	-1.83002	0.0672474	0.269173
TFAP2E-AS1	1.01116	-0.440762	2.27418	-0.193812	0.846323	NA
TFAP2E	2.6098	-0.708279	1.48759	-0.476126	0.633985	NA
PSMB2	3690.78	-0.0787903	0.0743525	-1.05969	0.289288	0.58319
C1orf216	106.6	-0.418993	0.224488	-1.86644	0.0619796	0.258758
CLSPN	1259.63	-0.392127	0.140567	-2.78962	0.00527704	0.0684854
ENSG00000232335	0.857896	-2.72971	3.20233	-0.852416	0.393983	NA
AGO4	521.393	0.32439	0.153802	2.10915	0.034932	0.191486
AGO1	1066.27	-0.184974	0.113585	-1.6285	0.103418	0.339224
CFAP97P1	0	NA	NA	NA	NA	NA
ENSG00000286899	0.101771	1.03349	4.08046	0.253278	0.800054	NA
ENSG00000271914	0	NA	NA	NA	NA	NA
AGO3	523.664	0.0996956	0.136926	0.728097	0.466554	0.728457
ENSG00000271554	0	NA	NA	NA	NA	NA
ENSG00000232862	0	NA	NA	NA	NA	NA
TEKT2	2.04319	-0.839861	1.38949	-0.604437	0.545553	NA
ADPRS	603.128	0.014447	0.114444	0.126237	0.899544	0.9626
COL8A2	6.03236	-0.208329	0.905223	-0.230141	0.817982	NA
TRAPPC3	1467.44	-0.175121	0.101141	-1.73145	0.083371	0.303013
MAP7D1	1908.72	-0.0173238	0.0966291	-0.179281	0.857717	0.943379
RN7SL131P	0	NA	NA	NA	NA	NA
THRAP3	6594.8	0.0442755	0.0746757	0.592904	0.553245	0.782919
UBE2V2P4	0	NA	NA	NA	NA	NA
SH3D21	1018.69	0.0102667	0.158024	0.0649693	0.948198	0.982587
EVA1B	450.607	-0.0120067	0.257794	-0.0465747	0.962852	0.987854
ENSG00000286379	4.70144	-0.282806	1.0361	-0.272953	0.78489	NA
STK40	1897.66	0.289926	0.189583	1.52928	0.126195	0.378297
LSM10	420.306	-0.323463	0.150446	-2.15003	0.031553	0.180736
RNU4-27P	0	NA	NA	NA	NA	NA
OSCP1	112.568	0.444191	0.308115	1.44164	0.149404	0.413904
SNORA63C	0	NA	NA	NA	NA	NA
MRPS15	2146.25	-0.319253	0.0977972	-3.26444	0.00109682	0.0275767
CSF3R	4174.5	0.696369	0.241931	2.87837	0.00399731	0.0587381
FTLP18	0	NA	NA	NA	NA	NA
ENSG00000284705	0	NA	NA	NA	NA	NA
ENSG00000284720	0	NA	NA	NA	NA	NA
ENSG00000234481	0	NA	NA	NA	NA	NA
GRIK3	0	NA	NA	NA	NA	NA
ENSG00000284650	0.101982	-0.890057	4.08046	-0.218127	0.82733	NA
ENSG00000223944	2.21565	-2.30064	1.65263	-1.39211	0.163888	NA
MIR4255	0	NA	NA	NA	NA	NA
RNU6-636P	0	NA	NA	NA	NA	NA
RNA5SP43	0	NA	NA	NA	NA	NA
RPS29P6	0	NA	NA	NA	NA	NA
ZC3H12A-DT	41.4259	0.189144	0.369028	0.512546	0.608269	0.815737
ZC3H12A	169.064	0.326152	0.170103	1.91738	0.0551895	0.243959
MIR6732	0	NA	NA	NA	NA	NA
MEAF6	827.706	-0.108523	0.119529	-0.907916	0.363923	0.651723
MIR5581	0	NA	NA	NA	NA	NA
SNIP1	740.301	-0.245737	0.158356	-1.5518	0.120711	0.369332
FTH1P1	0	NA	NA	NA	NA	NA
ENSG00000237749	0	NA	NA	NA	NA	NA
DNALI1	33.3316	0.290333	0.438939	0.661441	0.508329	0.756361
GNL2	2024.61	-0.354478	0.135773	-2.61082	0.00903258	0.0934126
ENSG00000284748	0.101771	1.03349	4.08046	0.253278	0.800054	NA
RSPO1	11.907	-0.684871	0.755451	-0.906572	0.364633	0.652042
C1orf109	499.173	-0.0353524	0.162571	-0.217458	0.827851	0.931786
CDCA8	981.462	-0.272935	0.110872	-2.4617	0.013828	0.118063
EPHA10	14.7704	-0.37924	0.594867	-0.637522	0.523785	0.766694
Y_RNA_17	0	NA	NA	NA	NA	NA
ACTN4P2	0	NA	NA	NA	NA	NA
ENSG00000227416	0	NA	NA	NA	NA	NA
MANEAL	116.601	-0.60606	0.344964	-1.75688	0.0789389	0.29405
ENSG00000233728	0.657947	3.46818	3.09016	1.12233	0.261722	NA
YRDC	904.289	-0.39397	0.131082	-3.00551	0.00265132	0.0470496
C1orf122	346.707	-0.334295	0.12495	-2.67542	0.00746349	0.0840099
MTF1	874.157	-0.0583214	0.119123	-0.489591	0.624423	0.825333
ENSG00000235673	0	NA	NA	NA	NA	NA
ENSG00000230955	0	NA	NA	NA	NA	NA
INPP5B	671.075	0.0618812	0.109549	0.564873	0.57216	0.794718
SNORA63_1	0	NA	NA	NA	NA	NA
RNU6-584P	0	NA	NA	NA	NA	NA
Metazoa_SRP_6	0	NA	NA	NA	NA	NA
SF3A3	2442.47	-0.348012	0.114236	-3.04644	0.0023157	0.043406
RNU6-510P	0	NA	NA	NA	NA	NA
FHL3	70.7352	0.012802	0.256014	0.050005	0.960118	0.986708
UTP11	1065.51	-0.157053	0.129427	-1.21345	0.224959	0.51354
POU3F1	3.26185	0.0380024	1.22455	0.0310338	0.975243	NA
MIR3659HG	0.112334	1.03349	4.08046	0.253278	0.800054	NA
ENSG00000223589	0	NA	NA	NA	NA	NA
MIR3659	0	NA	NA	NA	NA	NA
LINC02786	0	NA	NA	NA	NA	NA
ENSG00000286552	0	NA	NA	NA	NA	NA
ENSG00000287987	0.107516	-0.890057	4.08046	-0.218127	0.82733	NA
LINC01343	0	NA	NA	NA	NA	NA
ENSG00000275350	0	NA	NA	NA	NA	NA
RNU6-753P	0	NA	NA	NA	NA	NA
LINC01685	0	NA	NA	NA	NA	NA
HSPA5P1	0	NA	NA	NA	NA	NA
ENSG00000284632	0	NA	NA	NA	NA	NA
RRAGC	2451.58	0.434174	0.151766	2.86082	0.00422552	0.0605208
ENSG00000273637	6.54118	-2.19399	1.21206	-1.81013	0.0702756	NA
RRAGC-DT	26.1135	1.05089	0.478455	2.19643	0.028061	0.16885
MYCBP	1722.63	-0.312442	0.144046	-2.16904	0.0300795	0.17587
ENSG00000274944	2.91308	0.596184	1.82651	0.326406	0.744117	NA
GJA9	1.0949	-0.0457665	2.36237	-0.0193731	0.984543	NA
RHBDL2	3.70228	0.134869	1.03506	0.130301	0.896328	NA
RNU6-605P	0	NA	NA	NA	NA	NA
Y_RNA_18	0	NA	NA	NA	NA	NA
EIF1P2	0	NA	NA	NA	NA	NA
AKIRIN1	2786.59	0.109084	0.131682	0.828396	0.407446	0.686477
NDUFS5	2720.8	-0.279685	0.0910349	-3.07228	0.00212431	0.0412973
MACF1	4720.61	0.608494	0.260156	2.33895	0.0193378	0.139701
RNU6-608P	0	NA	NA	NA	NA	NA
RNA5SP44	0	NA	NA	NA	NA	NA
ENSG00000287422	0	NA	NA	NA	NA	NA
ENSG00000226438	0	NA	NA	NA	NA	NA
HSPE1P8	0	NA	NA	NA	NA	NA
BMP8A	64.4323	0.190325	0.284848	0.668163	0.504029	0.753653
OXCT2P1	0	NA	NA	NA	NA	NA
PPIEL	52.3326	-0.377901	0.382625	-0.987653	0.323323	0.617655
PABPC4	7895.6	-0.269035	0.108478	-2.48009	0.0131349	0.115634
PABPC4-AS1	0.444432	0	4.08046	0	1	NA
SNORA55	0	NA	NA	NA	NA	NA
HEYL	17.8557	-0.0301493	0.54948	-0.0548688	0.956243	0.986044
ENSG00000225903	0	NA	NA	NA	NA	NA
NT5C1A	0.445476	-0.890044	3.76991	-0.236092	0.813362	NA
HPCAL4	4.14073	-0.20067	1.31175	-0.152979	0.878415	NA
PPIE	774.553	-0.0157262	0.102428	-0.153535	0.877977	0.955537
ENSG00000225333	0	NA	NA	NA	NA	NA
RNU7-121P	0	NA	NA	NA	NA	NA
ENSG00000289711	0	NA	NA	NA	NA	NA
BMP8B	66.5654	0.207308	0.361051	0.574178	0.565847	0.790977
OXCT2	12.3106	-0.682932	0.646029	-1.05712	0.290455	0.584363
BMP8B-AS1	0.111108	0	4.08046	0	1	NA
ENSG00000261798	0.231134	-0.890049	4.08046	-0.218125	0.827332	NA
ENSG00000229213	0	NA	NA	NA	NA	NA
ENSG00000284719	0.216059	1.0335	4.08046	0.25328	0.800052	NA
LINC02811	0	NA	NA	NA	NA	NA
TRIT1	761.206	-0.0941562	0.143997	-0.653877	0.513191	0.759911
Y_RNA_19	0	NA	NA	NA	NA	NA
MYCL	308.698	-0.372954	0.188587	-1.97762	0.0479715	0.227664
MYCL-AS1	0.810321	-0.186487	2.61246	-0.0713837	0.943092	NA
Y_RNA_20	0	NA	NA	NA	NA	NA
MFSD2A	1223.39	1.23556	0.618966	1.99617	0.0459154	0.221828
ENSG00000228477	0	NA	NA	NA	NA	NA
CAP1	9247.6	0.133858	0.0787465	1.69986	0.0891573	0.313322
PPT1	4144.26	0.320562	0.125454	2.55522	0.0106121	0.102404
OAZ1P1	0	NA	NA	NA	NA	NA
RLF	1547.7	0.627087	0.198685	3.15618	0.0015985	0.0348154
RNU6-1237P	0	NA	NA	NA	NA	NA
TMCO2	0.112334	1.03349	4.08046	0.253278	0.800054	NA
ZMPSTE24-DT	70.8561	-0.42074	0.265329	-1.58573	0.112801	0.355807
ZMPSTE24	2798.36	-0.267729	0.134377	-1.99238	0.0463297	0.223095
ENSG00000231296	0	NA	NA	NA	NA	NA
COL9A2	199.316	0.337857	0.236645	1.42769	0.15338	0.41859
ENSG00000227311	0	NA	NA	NA	NA	NA
SMAP2	493.307	0.0795971	0.121788	0.65357	0.513389	0.760076
ENSG00000213172	0	NA	NA	NA	NA	NA
ENSG00000284677	0	NA	NA	NA	NA	NA
ZFP69B	39.2831	-1.01524	0.415431	-2.44381	0.014533	0.12083
ENSG00000260920	20.7691	-0.511571	0.466803	-1.0959	0.273121	0.567153
ENSG00000279667	0	NA	NA	NA	NA	NA
ZFP69	82.6737	0.0959324	0.24482	0.391849	0.69517	0.866922
EXO5-DT	3.30433	-0.472751	1.07076	-0.44151	0.658844	NA
EXO5	112.367	-0.170547	0.237498	-0.718099	0.472696	0.733318
ENSG00000227278	0	NA	NA	NA	NA	NA
ENSG00000238186	0.329046	0.894456	4.04486	0.221134	0.824988	NA
ZNF684	38.852	0.23219	0.33048	0.702585	0.482315	0.7406
ENSG00000286838	0	NA	NA	NA	NA	NA
ENSG00000236505	0	NA	NA	NA	NA	NA
GTF2F2P2	0	NA	NA	NA	NA	NA
RIMS3	71.4741	0.606403	0.331753	1.82788	0.0675678	0.26994
ENSG00000287743	0	NA	NA	NA	NA	NA
ENSG00000237899	0	NA	NA	NA	NA	NA
NFYC-AS1	15.0218	-0.356716	0.507799	-0.702475	0.482383	0.740627
NFYC	1093.4	-0.155965	0.120849	-1.29058	0.196851	0.476853
MIR30E	0	NA	NA	NA	NA	NA
MIR30C1	0	NA	NA	NA	NA	NA
KCNQ4	6.27805	-1.15252	0.909095	-1.26777	0.20488	NA
RN7SL326P	0	NA	NA	NA	NA	NA
CITED4	20.9706	-0.642854	0.563967	-1.13988	0.254337	0.545998
ENSG00000229528	0	NA	NA	NA	NA	NA
ENSG00000228940	0	NA	NA	NA	NA	NA
ENSG00000286668	0	NA	NA	NA	NA	NA
UBE2V1P8	0	NA	NA	NA	NA	NA
CTPS1	1596.61	-0.570946	0.151423	-3.77053	0.000162904	0.00793306
SLFNL1-AS1	10.3873	-0.411892	0.675095	-0.610124	0.541779	NA
SLFNL1	7.24395	-1.62294	0.860251	-1.88659	0.0592151	NA
SCMH1	156.809	-0.176152	0.22776	-0.773411	0.439279	0.709526
RPL23AP17	0	NA	NA	NA	NA	NA
ENSG00000287400	0	NA	NA	NA	NA	NA
SCMH1-DT	0	NA	NA	NA	NA	NA
ENSG00000213987	0	NA	NA	NA	NA	NA
ENSG00000286640	8.93015	-0.000892954	0.862851	-0.00103489	0.999174	NA
FOXO6	468.538	0.499437	0.206025	2.42415	0.0153441	0.124577
FOXO6-AS1	0.334368	-0.890041	4.08046	-0.218123	0.827333	NA
RNA5SP45	0	NA	NA	NA	NA	NA
EDN2	0.218175	-0.890049	4.08046	-0.218125	0.827332	NA
HIVEP3	31.1104	0.0948077	0.357866	0.264925	0.791067	0.915046
ENSG00000230881	0	NA	NA	NA	NA	NA
ENSG00000230638	0	NA	NA	NA	NA	NA
ENSG00000284895	0	NA	NA	NA	NA	NA
ENSG00000287587	0	NA	NA	NA	NA	NA
HNRNPFP1	0	NA	NA	NA	NA	NA
ENSG00000228776	0	NA	NA	NA	NA	NA
GUCA2B	0	NA	NA	NA	NA	NA
GUCA2A	0.239074	1.0335	4.08046	0.25328	0.800052	NA
FOXJ3	1891.71	0.581328	0.166916	3.48276	0.000496268	0.0172025
ENSG00000227527	0.33611	0	4.08046	0	1	NA
RIMKLA	206.384	2.05645	0.367	5.6034	2.10191e-08	1.33955e-05
ENSG00000235002	0	NA	NA	NA	NA	NA
ZMYND12	8.47534	0.232223	0.73669	0.315224	0.752591	NA
PPCS	1084.06	0.0516651	0.104574	0.494051	0.62127	0.82338
CCDC30	22.6006	1.08501	0.446818	2.42831	0.0151696	0.123806
RPS3AP11	0	NA	NA	NA	NA	NA
TMSB4XP1	0	NA	NA	NA	NA	NA
RNU6-536P	0	NA	NA	NA	NA	NA
ENSG00000236180	0	NA	NA	NA	NA	NA
PPIH	882.452	-0.0488143	0.113856	-0.428739	0.668113	0.851583
ENSG00000285728	36.2933	-0.491546	0.393575	-1.24893	0.211692	0.496319
ENSG00000234917	0.888059	-0.890063	2.69025	-0.330848	0.74076	NA
YBX1	15935	-0.232846	0.128174	-1.81664	0.069272	0.274281
CLDN19	233.167	2.13661	0.376459	5.67554	1.3825e-08	1.01323e-05
P3H1	840.184	0.0332518	0.147426	0.225549	0.821552	0.928881
C1orf50	268.264	-0.110091	0.145059	-0.758939	0.447889	0.714872
ENSG00000283580	0.647285	0	4.00244	0	1	NA
ENSG00000228452	0	NA	NA	NA	NA	NA
TMEM269	3.01063	0.0641707	1.09713	0.0584898	0.953358	NA
SVBP	246.268	0.0103271	0.145256	0.0710954	0.943322	0.980653
ERMAP	151.91	0.0604839	0.209785	0.288313	0.773107	0.905417
ZNF691-DT	22.7276	0.273775	0.429866	0.636885	0.5242	0.766694
ZNF691	107.199	-0.000233416	0.190874	-0.00122288	0.999024	0.999559
ENSG00000233708	0	NA	NA	NA	NA	NA
MKRN8P	0	NA	NA	NA	NA	NA
ATP6V1E1P1	0	NA	NA	NA	NA	NA
ENSG00000288955	6.42754	1.01542	1.00194	1.01345	0.310845	NA
SLC2A1	29019.6	0.362755	0.168062	2.15847	0.0308917	0.178694
ATP6V0CP4	0	NA	NA	NA	NA	NA
SLC2A1-DT	31.9994	0.0866272	0.389004	0.22269	0.823777	0.929555
ENSG00000283973	2.56291	0.661955	1.43303	0.461926	0.644134	NA
RNU6-880P	0	NA	NA	NA	NA	NA
U6_2	0	NA	NA	NA	NA	NA
ENSG00000277513	0	NA	NA	NA	NA	NA
FAM183A	4.61911	0.105804	1.2271	0.0862229	0.931289	NA
EBNA1BP2	2149.32	-0.310323	0.115993	-2.67537	0.00746468	0.0840099
MIR6733	0	NA	NA	NA	NA	NA
CFAP57	14.8694	0.855745	0.512383	1.67013	0.0948943	0.323931
RNA5SP46	0	NA	NA	NA	NA	NA
TMEM125	119.313	0.152498	0.268508	0.567945	0.570072	0.793177
C1orf210	163.453	-0.0576755	0.175894	-0.3279	0.742987	0.892421
TIE1	0.414994	-0.789214	3.22406	-0.244789	0.80662	NA
MPL	2.79852	-1.08138	1.19291	-0.906501	0.364671	NA
ENSG00000287113	0.114941	-0.890057	4.08046	-0.218127	0.82733	NA
CDC20-DT	4.65427	0.456328	0.986694	0.462482	0.643736	NA
CDC20	1857.67	-0.536603	0.182174	-2.94555	0.00322382	0.0518712
ELOVL1	1555.97	-0.0772749	0.104807	-0.737304	0.460938	0.724257
MIR6734	0	NA	NA	NA	NA	NA
ENSG00000288772	0.32444	-2.37235	3.99454	-0.593897	0.552581	NA
MED8	674.66	-0.049575	0.108469	-0.457044	0.64764	0.840306
MED8-AS1	1.63725	-1.82536	1.75601	-1.03949	0.298575	NA
SZT2	616.341	-0.0715016	0.130281	-0.548825	0.583125	0.800346
SZT2-AS1	0	NA	NA	NA	NA	NA
MIR6735	0	NA	NA	NA	NA	NA
HYI	53.0716	-0.835994	0.45249	-1.84754	0.0646691	0.264413
HYI-AS1	0	NA	NA	NA	NA	NA
PTPRF	6080.97	0.096594	0.152993	0.631364	0.527803	0.768862
KDM4A	876.083	0.0915178	0.114088	0.802166	0.422457	0.696869
ENSG00000284989	1.02373	4.09641	3.93642	1.04065	0.29804	NA
KDM4A-AS1	16.2549	-0.399107	0.58829	-0.678419	0.497506	0.74987
ST3GAL3	47.3494	0.182517	0.324289	0.562822	0.573556	0.795374
ST3GAL3-AS1	0	NA	NA	NA	NA	NA
U6_3	0	NA	NA	NA	NA	NA
ENSG00000233674	0	NA	NA	NA	NA	NA
MIR6079	0	NA	NA	NA	NA	NA
SHMT1P1	0	NA	NA	NA	NA	NA
ARTN	1.10924	1.94389	1.96572	0.988892	0.322716	NA
LINC02918	2.10885	-0.721806	1.32442	-0.544996	0.585756	NA
ENSG00000288573	0.636388	1.86649	2.94095	0.634657	0.525652	NA
IPO13	409.678	-0.371352	0.158646	-2.34075	0.0192449	0.139436
ENSG00000285649	1.86484	-0.0125439	1.48661	-0.00843794	0.993268	NA
DPH2	535.826	-0.565017	0.160016	-3.53102	0.000413967	0.014836
ATP6V0B	1406.02	-0.120045	0.118219	-1.01545	0.309893	0.604284
B4GALT2	394.319	-0.506289	0.201818	-2.50863	0.0121199	0.110412
CCDC24	90.3447	-0.245617	0.247602	-0.991981	0.321207	0.615997
SLC6A9	159.225	-0.799498	0.282628	-2.8288	0.00467229	0.0638508
ENSG00000230615	12.2262	-1.27037	0.676171	-1.87877	0.060276	0.254855
ENSG00000227163	0	NA	NA	NA	NA	NA
KRT8P47	0	NA	NA	NA	NA	NA
RN7SL479P	0	NA	NA	NA	NA	NA
KLF17	0.955073	1.64657	2.2298	0.738438	0.460248	NA
ENSG00000233514	0	NA	NA	NA	NA	NA
KLF18	0	NA	NA	NA	NA	NA
ENSG00000226804	0	NA	NA	NA	NA	NA
Y_RNA_21	0	NA	NA	NA	NA	NA
OOSP1P1	0	NA	NA	NA	NA	NA
ENSG00000227994	0	NA	NA	NA	NA	NA
ENSG00000271329	0	NA	NA	NA	NA	NA
DMAP1	695.701	-0.348091	0.156743	-2.22077	0.0263663	0.163554
ERI3	775.165	-0.17151	0.121768	-1.4085	0.158982	0.427099
ERI3-IT1	0.344026	2.00056	4.00733	0.499225	0.617621	NA
RNU6-369P	0	NA	NA	NA	NA	NA
RNF220	1032.94	-0.000254635	0.11461	-0.00222175	0.998227	0.999318
MIR5584	0	NA	NA	NA	NA	NA
TMEM53	98.2561	-0.130356	0.260969	-0.499506	0.617423	0.820567
ARMH1	1.11831	2.25523	2.35681	0.956899	0.338618	NA
RNU5F-1	0.232385	0	4.08046	0	1	NA
RNU5D-1	0.889979	0.681771	2.0162	0.338147	0.735252	NA
KIF2C	1088.9	-0.117649	0.11669	-1.00822	0.31335	0.607885
ENSG00000225721	4.46413	0.14901	1.02795	0.144958	0.884744	NA
RPS8	39086.4	0.296166	0.104056	2.84621	0.00442427	0.0615869
SNORD55	0	NA	NA	NA	NA	NA
SNORD46	0	NA	NA	NA	NA	NA
SNORD38A	0	NA	NA	NA	NA	NA
SNORD38B_1	0	NA	NA	NA	NA	NA
SNORD38B_2	0	NA	NA	NA	NA	NA
RPS15AP11	0	NA	NA	NA	NA	NA
BEST4	5.11119	-0.218329	1.05697	-0.206561	0.836353	NA
PLK3	202.729	0.394875	0.250833	1.57426	0.115428	0.360911
DYNLT4	2.13085	0.173592	1.59013	0.109168	0.913069	NA
BTBD19	15.6201	-0.388189	0.515379	-0.75321	0.451323	0.716776
PTCH2	6.54199	-0.0930353	0.777158	-0.119712	0.904711	NA
RNU5E-6P	0.101982	-0.890057	4.08046	-0.218127	0.82733	NA
ENSG00000226499	0	NA	NA	NA	NA	NA
EIF2B3	458.563	-0.288443	0.166244	-1.73506	0.0827304	0.301358
RNA5SP47	0	NA	NA	NA	NA	NA
CCNB1IP1P1	0	NA	NA	NA	NA	NA
PPIAP35	0	NA	NA	NA	NA	NA
MRPS17P1	0	NA	NA	NA	NA	NA
HECTD3	837.712	-0.0586429	0.107644	-0.544784	0.585902	0.802481
UROD	526.396	-0.261872	0.132602	-1.97488	0.0482822	0.228518
ZSWIM5	37.3478	-0.00949372	0.315342	-0.0301061	0.975982	0.991697
OSTCP5	0	NA	NA	NA	NA	NA
LINC01144	4.98812	0.116352	0.853925	0.136256	0.891619	NA
HPDL	222.597	-0.738951	0.365642	-2.02097	0.0432831	0.21538
MUTYH	273.307	-0.495216	0.220284	-2.24808	0.0245712	0.157277
ENSG00000288208	2.49781	-4.34908	2.63158	-1.65265	0.0984027	NA
TOE1	412.033	-0.556497	0.16985	-3.2764	0.00105139	0.0269449
TESK2	253.347	0.351929	0.183974	1.91293	0.0557568	0.244926
PPIAP36	0	NA	NA	NA	NA	NA
CCDC163	29.5381	-0.644813	0.427573	-1.50808	0.131535	0.387389
MMACHC	249.868	-0.507101	0.218019	-2.32595	0.0200214	0.142463
PRDX1	11341.4	-0.0198374	0.0949825	-0.208853	0.834563	0.934275
HMGB1P48	0	NA	NA	NA	NA	NA
AKR1A1	1146.31	0.056133	0.0915527	0.613123	0.539795	0.77587
ENSG00000281133	0	NA	NA	NA	NA	NA
ENSG00000280836	0	NA	NA	NA	NA	NA
ENSG00000289407	2.63481	0.380152	1.22285	0.310873	0.755897	NA
NASP	11036.2	-0.205166	0.0879163	-2.33366	0.0196136	0.140629
ENSG00000281112	0	NA	NA	NA	NA	NA
ENSG00000281825	0	NA	NA	NA	NA	NA
CCDC17	8.25805	-0.0809642	0.668665	-0.121083	0.903625	NA
GPBP1L1	3031.88	0.0856174	0.103661	0.82594	0.408838	0.687808
RPS15AP10	0	NA	NA	NA	NA	NA
ENSG00000234329	0	NA	NA	NA	NA	NA
TMEM69	1400.65	-0.12727	0.0843981	-1.50797	0.131563	0.387395
IPP	411.598	-0.0739082	0.141701	-0.521579	0.601964	0.812114
ENSG00000230896	13.7046	-0.168433	0.563969	-0.298656	0.765202	0.902613
ENSG00000236111	0	NA	NA	NA	NA	NA
MAST2	1658.2	-0.0930186	0.0869193	-1.07017	0.284542	0.578424
TMA16P2	0	NA	NA	NA	NA	NA
PIK3R3	730.35	-0.32879	0.246562	-1.3335	0.182368	0.458266
P3R3URF-PIK3R3	4.8325	0.800689	3.75239	0.213381	0.83103	NA
ENSG00000226957	0.314649	1.7937	4.05087	0.442794	0.657915	NA
ENSG00000233114	0	NA	NA	NA	NA	NA
ENSG00000227857	0.226049	-0.890049	4.08046	-0.218125	0.827332	NA
TSPAN1	4.14395	-0.103781	1.17711	-0.0881658	0.929745	NA
P3R3URF	0	NA	NA	NA	NA	NA
POMGNT1	1104.13	-0.162874	0.104849	-1.55341	0.120326	0.36889
LURAP1	76.2655	0.207749	0.371919	0.558587	0.576443	0.796891
RAD54L	614.786	-0.125745	0.130514	-0.96346	0.335317	0.627162
LRRC41	960.914	-0.251729	0.12541	-2.00725	0.0447226	0.218831
UQCRH	4256.22	-0.235154	0.102231	-2.30022	0.0214357	0.147205
NSUN4	1038.25	-0.0122623	0.0955082	-0.12839	0.89784	0.961692
ENSG00000225779	0	NA	NA	NA	NA	NA
FAAH	180.55	-0.143362	0.207485	-0.690951	0.489596	0.745456
FAAHP1	1.38789	0.641822	2.04565	0.31375	0.753711	NA
LINC01398	0.229737	1.94268	4.03697	0.481223	0.630358	NA
DMBX1	1.83875	0.759061	1.93187	0.392915	0.694382	NA
TMEM275	0	NA	NA	NA	NA	NA
MKNK1-AS1	3.38387	-0.537979	1.24888	-0.43077	0.666635	NA
KNCN	0	NA	NA	NA	NA	NA
MKNK1	716.928	-0.124276	0.126583	-0.981777	0.32621	0.619778
MOB3C	51.9736	-0.109772	0.303274	-0.361957	0.717384	0.877601
ATPAF1	1618.15	-0.0420342	0.0954403	-0.440425	0.65963	0.845996
NENFP1	0	NA	NA	NA	NA	NA
TEX38	0.557075	-0.890059	3.00707	-0.295989	0.767239	NA
EFCAB14-AS1	0	NA	NA	NA	NA	NA
EFCAB14	3415.31	0.0171591	0.0891821	0.192405	0.847425	0.938326
ENSG00000236476	0	NA	NA	NA	NA	NA
CYP4B1	3.57262	0.721284	1.15241	0.625891	0.531386	NA
CYP4Z2P	0	NA	NA	NA	NA	NA
TUBAP8	0	NA	NA	NA	NA	NA
CYP4A11	0	NA	NA	NA	NA	NA
CYP4A26P	0	NA	NA	NA	NA	NA
CYP4A43P	0	NA	NA	NA	NA	NA
CYP4A27P	0	NA	NA	NA	NA	NA
CYP4A44P	0	NA	NA	NA	NA	NA
CYP4X1	0.103725	0	4.08046	0	1	NA
CYP4Z1	0.101771	1.03349	4.08046	0.253278	0.800054	NA
TUBAP9	0	NA	NA	NA	NA	NA
CYP4A22-AS1	0	NA	NA	NA	NA	NA
CYP4A22	0	NA	NA	NA	NA	NA
MTND1P34	0	NA	NA	NA	NA	NA
LINC00853	0.103725	0	4.08046	0	1	NA
PDZK1IP1	0.525491	0.0717235	3.66655	0.0195616	0.984393	NA
TAL1	0.20745	0	4.08046	0	1	NA
ENSG00000226252	0	NA	NA	NA	NA	NA
STIL	773.276	-0.161998	0.108106	-1.4985	0.134002	0.391043
CMPK1	3794.98	-0.0587512	0.0919702	-0.638807	0.522949	0.766308
LINC01389	0	NA	NA	NA	NA	NA
FOXE3	1.23978	0.794551	1.74696	0.454818	0.64924	NA
FOXD2-AS1	12.6349	-0.392253	0.861535	-0.455296	0.648897	0.841207
FOXD2	4.15331	0.259651	1.28481	0.202094	0.839844	NA
ENSG00000271355	0	NA	NA	NA	NA	NA
RPL21P24	0	NA	NA	NA	NA	NA
ATP6V0E1P4	0	NA	NA	NA	NA	NA
LINC01738	0.103725	0	4.08046	0	1	NA
TRABD2B	0	NA	NA	NA	NA	NA
ENSG00000223814	0	NA	NA	NA	NA	NA
ENSG00000225028	0	NA	NA	NA	NA	NA
LINC02794	0	NA	NA	NA	NA	NA
ENSG00000231413	0	NA	NA	NA	NA	NA
CYP46A4P	0	NA	NA	NA	NA	NA
SKINT1L	0	NA	NA	NA	NA	NA
ENSG00000279096	0	NA	NA	NA	NA	NA
ENSG00000223720	0	NA	NA	NA	NA	NA
SLC5A9	0	NA	NA	NA	NA	NA
ENSG00000272491	0	NA	NA	NA	NA	NA
ENSG00000279214	0	NA	NA	NA	NA	NA
SPATA6	60.735	0.633539	0.527799	1.20034	0.230007	0.519082
PPP1R8P1	0	NA	NA	NA	NA	NA
RNU6-723P	0	NA	NA	NA	NA	NA
ENSG00000235105	0	NA	NA	NA	NA	NA
RNU4-61P	0	NA	NA	NA	NA	NA
ENSG00000232514	0	NA	NA	NA	NA	NA
AGBL4	1.76456	0.0877822	1.57972	0.0555683	0.955686	NA
ENSG00000287661	0	NA	NA	NA	NA	NA
BEND5	1.22164	1.13931	2.27203	0.501449	0.616055	NA
ENSG00000286597	0	NA	NA	NA	NA	NA
ENSG00000229846	0	NA	NA	NA	NA	NA
AGBL4-AS1	0	NA	NA	NA	NA	NA
AGBL4-IT1	0	NA	NA	NA	NA	NA
ENSG00000237478	0	NA	NA	NA	NA	NA
ZNF859P	0	NA	NA	NA	NA	NA
ENSG00000279324	0	NA	NA	NA	NA	NA
MTND2P29	0	NA	NA	NA	NA	NA
ELAVL4	0.127966	1.03349	4.08046	0.253278	0.800054	NA
ENSG00000230828	0	NA	NA	NA	NA	NA
ELAVL4-AS1	0	NA	NA	NA	NA	NA
ENSG00000233407	0	NA	NA	NA	NA	NA
LINC02808	0	NA	NA	NA	NA	NA
ENSG00000284645	0	NA	NA	NA	NA	NA
ENSG00000234080	0	NA	NA	NA	NA	NA
HMGB1P45	0	NA	NA	NA	NA	NA
FCF1P6	0	NA	NA	NA	NA	NA
DMRTA2	1.1044	-1.44605	2.1149	-0.683742	0.494138	NA
ENSG00000284700	0	NA	NA	NA	NA	NA
FAF1	1549.55	-0.114491	0.0919645	-1.24495	0.21315	0.498143
FAF1-AS1	0	NA	NA	NA	NA	NA
RNU6-1026P	0	NA	NA	NA	NA	NA
PHBP12	0	NA	NA	NA	NA	NA
MRPS6P2	0	NA	NA	NA	NA	NA
CDKN2C	28.4666	0.169617	0.37492	0.452408	0.650975	0.841829
MIR4421	0	NA	NA	NA	NA	NA
MIR6500	0	NA	NA	NA	NA	NA
C1orf185	0	NA	NA	NA	NA	NA
Y_RNA_22	0	NA	NA	NA	NA	NA
CFL1P2	0	NA	NA	NA	NA	NA
LINC01562	0.227301	0	4.08046	0	1	NA
RNF11	4000.3	0.498477	0.200434	2.48699	0.0128831	0.114448
ENSG00000233406	0	NA	NA	NA	NA	NA
ENSG00000236434	0	NA	NA	NA	NA	NA
TTC39A	266.777	-0.309446	0.264503	-1.16991	0.242035	0.532911
TTC39A-AS1	0	NA	NA	NA	NA	NA
EPS15	2882.94	0.163911	0.122347	1.33972	0.180337	0.455205
ENSG00000232027	0	NA	NA	NA	NA	NA
RNU6-877P	0	NA	NA	NA	NA	NA
ENSG00000238140	0.89165	0	3.02496	0	1	NA
EPS15-AS1	0	NA	NA	NA	NA	NA
RNU6-1281P	0	NA	NA	NA	NA	NA
CALR4P	1.31966	0.892084	1.83341	0.48657	0.626563	NA
OSBPL9	3699.4	0.261779	0.0991027	2.6415	0.00825404	0.0883122
GAPDHP51	0	NA	NA	NA	NA	NA
SLC25A6P3	0	NA	NA	NA	NA	NA
ENSG00000212624	0	NA	NA	NA	NA	NA
NRDC	5838.64	0.00601515	0.104947	0.0573163	0.954293	0.985586
ENSG00000266993	12.9464	0.512954	0.593033	0.864968	0.387057	0.669753
ENSG00000272175	0.985061	0.4122	2.0388	0.202177	0.839778	NA
MIR761	0	NA	NA	NA	NA	NA
TSEN15P2	0	NA	NA	NA	NA	NA
RAB3B	1224.56	0.151386	0.180025	0.840915	0.400396	0.681017
RNA5SP48	0	NA	NA	NA	NA	NA
ENSG00000229032	0	NA	NA	NA	NA	NA
RN7SL290P	0	NA	NA	NA	NA	NA
TXNDC12	1044.44	0.0656156	0.117014	0.56075	0.574968	0.79606
ENSG00000285839	3.87173	0.791717	3.77173	0.209908	0.833739	NA
KTI12	367.577	-0.113417	0.130991	-0.865837	0.38658	0.669165
ENSG00000223390	0.791776	3.00222	3.18411	0.942874	0.345745	NA
TXNDC12-AS1	0.209499	-1.74756	4.04132	-0.432422	0.665435	NA
BTF3L4	2719.28	-0.0676738	0.103134	-0.656175	0.511712	0.759247
ZFYVE9	684.13	0.0373399	0.130632	0.28584	0.775001	0.906549
RN7SL788P	0	NA	NA	NA	NA	NA
ENSG00000228407	0	NA	NA	NA	NA	NA
ENSG00000223429	0	NA	NA	NA	NA	NA
PDCL3P6	0	NA	NA	NA	NA	NA
ENSG00000236004	0	NA	NA	NA	NA	NA
DNAJC19P7	0	NA	NA	NA	NA	NA
ANAPC10P1	0	NA	NA	NA	NA	NA
CC2D1B	993.991	-0.0303598	0.115895	-0.26196	0.793352	0.916075
ENSG00000272100	2.17844	-0.555342	1.63511	-0.339636	0.734131	NA
ENSG00000287078	0.982391	0.0717172	2.43036	0.0295089	0.976459	NA
PLA2G12AP1	0	NA	NA	NA	NA	NA
ORC1	821.914	-0.313797	0.101951	-3.07792	0.00208453	0.0408236
PRPF38A	1711.39	0.0206357	0.0942995	0.218831	0.826782	0.931225
TUT4	1530.69	0.129744	0.0999899	1.29757	0.194434	0.472952
ENSG00000272371	0	NA	NA	NA	NA	NA
EEF1GP7	0	NA	NA	NA	NA	NA
GPX7	116.095	0.275494	0.231859	1.18819	0.234757	0.525153
SHISAL2A	0.323643	0	4.08046	0	1	NA
COA7	1921.56	-0.265825	0.115327	-2.30497	0.0211682	0.14636
NDUFS5P3	0	NA	NA	NA	NA	NA
RN7SL62P	0	NA	NA	NA	NA	NA
ZYG11B	3543.37	0.289633	0.12201	2.37385	0.0176036	0.133043
RNU2-30P	0	NA	NA	NA	NA	NA
RPS13P2	0	NA	NA	NA	NA	NA
RNU6-969P	0	NA	NA	NA	NA	NA
ZYG11A	153.979	-0.11934	0.209156	-0.570582	0.568283	0.792301
ENSG00000242391	0.229882	-1.86432	4.03102	-0.462492	0.643728	NA
ECHDC2	626.943	0.269897	0.180701	1.49361	0.135277	0.393273
ENSG00000230953	0	NA	NA	NA	NA	NA
ENSG00000231866	0	NA	NA	NA	NA	NA
SCP2	2651.07	0.15339	0.101792	1.5069	0.131836	0.387707
ENSG00000264834	0	NA	NA	NA	NA	NA
ENSG00000266188	0	NA	NA	NA	NA	NA
ENSG00000265815	0	NA	NA	NA	NA	NA
H3P2	0	NA	NA	NA	NA	NA
RRAS2P1	0	NA	NA	NA	NA	NA
TUBBP10	0	NA	NA	NA	NA	NA
PODN	1.23726	-1.45015	2.31346	-0.62683	0.53077	NA
ENSG00000232993	0.101771	1.03349	4.08046	0.253278	0.800054	NA
HIGD1AP11	0	NA	NA	NA	NA	NA
SLC1A7	1.06542	1.34378	2.03695	0.659703	0.509444	NA
ENSG00000235563	0	NA	NA	NA	NA	NA
ENSG00000277397	0	NA	NA	NA	NA	NA
CPT2	1018.52	-0.043696	0.133381	-0.327603	0.743212	0.892482
ENSG00000236723	1.41574	0.260588	1.94827	0.133753	0.893598	NA
CZIB	741.176	-0.217974	0.133197	-1.63648	0.101739	0.336291
CZIB-DT	0.635044	1.41599	3.44472	0.411059	0.681029	NA
MAGOH	1350.46	-0.204141	0.111018	-1.83881	0.0659432	0.266647
MAGOH-DT	12.9709	0.530651	0.704095	0.753663	0.451052	0.716617
LRP8	1179.98	-0.350679	0.107682	-3.25662	0.00112748	0.0280587
ENSG00000234578	0	NA	NA	NA	NA	NA
ENSG00000228838	0.311269	-0.785791	4.04132	-0.194439	0.845832	NA
ENSG00000232762	0.101982	-0.890057	4.08046	-0.218127	0.82733	NA
LRP8-DT	0.900584	0.685584	2.01057	0.340989	0.733112	NA
ENSG00000285954	0	NA	NA	NA	NA	NA
ENSG00000226938	0	NA	NA	NA	NA	NA
LINC02812	1.29122	0.882256	2.23017	0.3956	0.6924	NA
SLC25A3P1	0	NA	NA	NA	NA	NA
ENSG00000288527	0	NA	NA	NA	NA	NA
DMRTB1	0	NA	NA	NA	NA	NA
GLIS1	0.444432	0	4.08046	0	1	NA
RNU7-95P	0	NA	NA	NA	NA	NA
NDC1	3701.04	-0.11242	0.0981298	-1.14563	0.25195	0.544541
ENSG00000201003	0	NA	NA	NA	NA	NA
ENSG00000229687	0	NA	NA	NA	NA	NA
YIPF1	701.192	-0.0418101	0.141599	-0.295272	0.767786	0.903491
DIO1	32.4243	0.20794	0.444334	0.467981	0.639798	0.834496
HSPB11	502.424	0.12684	0.120348	1.05395	0.291907	0.585651
LRRC42	701.073	0.0645184	0.115047	0.560799	0.574934	0.79606
HNRNPA3P12	0	NA	NA	NA	NA	NA
LDLRAD1	0.111108	0	4.08046	0	1	NA
TMEM59	3472.95	0.524936	0.157738	3.3279	0.000875025	0.024064
ENSG00000280378	0	NA	NA	NA	NA	NA
TCEANC2	311.986	0.0719289	0.134783	0.533665	0.593573	0.807692
MIR4781	0	NA	NA	NA	NA	NA
ENSG00000225183	0	NA	NA	NA	NA	NA
ENSG00000279049	0	NA	NA	NA	NA	NA
ENSG00000256407	0.879202	1.0642	2.74843	0.387204	0.698605	NA
CDCP2	0	NA	NA	NA	NA	NA
ENSG00000280425	0	NA	NA	NA	NA	NA
CYB5RL	114.203	0.0775278	0.203344	0.381264	0.703008	0.871137
MRPL37	1943.78	-0.230763	0.116934	-1.97344	0.0484453	0.228847
SSBP3	3159.34	-0.134303	0.16274	-0.825261	0.409224	0.687969
SSBP3-AS1	11.1228	-0.357844	0.641529	-0.557799	0.576982	0.796891
ENSG00000225632	0	NA	NA	NA	NA	NA
ENSG00000232245	0	NA	NA	NA	NA	NA
ENSG00000287582	0.631215	-0.583514	2.85162	-0.204625	0.837865	NA
LINC02784	0.111108	0	4.08046	0	1	NA
ENSG00000237173	0	NA	NA	NA	NA	NA
HNRNPA1P63	0	NA	NA	NA	NA	NA
ACOT11	116.898	1.74183	0.296977	5.8652	4.48584e-09	4.10959e-06
FAM151A	9.31311	0.0172412	1.10125	0.015656	0.987509	NA
ENSG00000230728	0	NA	NA	NA	NA	NA
MROH7	0.111108	0	4.08046	0	1	NA
MROH7-TTC4	1.15186	-1.16504	2.24848	-0.518144	0.604358	NA
TTC4	648.821	-0.318982	0.131377	-2.428	0.0151825	0.123843
PARS2	207.636	0.272205	0.155209	1.7538	0.0794649	0.295184
TTC22	13.4037	0.788875	0.654984	1.20442	0.228428	0.517194
ENSG00000237453	0	NA	NA	NA	NA	NA
LEXM	0.116193	0	4.08046	0	1	NA
DHCR24	5912.98	-0.0546693	0.131523	-0.415664	0.677656	0.858005
ENSG00000287724	0	NA	NA	NA	NA	NA
ENSG00000242396	3.4778	-1.50362	1.31822	-1.14064	0.254018	NA
DHCR24-DT	0.962664	-0.408629	1.84074	-0.221992	0.82432	NA
ENSG00000284601	0.116193	0	4.08046	0	1	NA
TMEM61	0.547247	0.0717189	3.0936	0.023183	0.981504	NA
ENSG00000233271	0.215032	-1.78032	4.03835	-0.440853	0.659319	NA
BSND	5.29376	0.00817663	0.971565	0.00841593	0.993285	NA
PCSK9	1.29084	-2.77291	1.97855	-1.40149	0.161068	NA
USP24	1458.42	-0.1628	0.100139	-1.62574	0.104004	0.340441
MIR4422HG	0	NA	NA	NA	NA	NA
GYG1P3	0	NA	NA	NA	NA	NA
MIR4422	0	NA	NA	NA	NA	NA
ENSG00000234810	0	NA	NA	NA	NA	NA
GOT2P1	0	NA	NA	NA	NA	NA
MTCO2P34	0	NA	NA	NA	NA	NA
RN7SKP291	0	NA	NA	NA	NA	NA
RNU6-830P	0	NA	NA	NA	NA	NA
Y_RNA_23	0	NA	NA	NA	NA	NA
LINC01755	0	NA	NA	NA	NA	NA
LINC01753	0	NA	NA	NA	NA	NA
PIGQP1	0	NA	NA	NA	NA	NA
ENSG00000235612	0	NA	NA	NA	NA	NA
ENSG00000260971	1.17978	1.91021	2.03527	0.938557	0.347958	NA
ENSG00000284686	7.35057	0.437367	0.758874	0.576336	0.564388	NA
RPSAP20	0	NA	NA	NA	NA	NA
LINC01767	0.968865	0.596941	2.43031	0.245624	0.805973	NA
PLPP3	2133.82	0.0600324	0.195006	0.307849	0.758197	0.900464
RPL21P23	0	NA	NA	NA	NA	NA
RPL23AP85	0	NA	NA	NA	NA	NA
ENSG00000225475	0	NA	NA	NA	NA	NA
PRKAA2	650.345	0.408069	0.170084	2.39922	0.0164302	0.129064
FYB2	6.82322	-0.884902	0.894901	-0.988827	0.322748	NA
ENSG00000229913	0	NA	NA	NA	NA	NA
C8A	0	NA	NA	NA	NA	NA
C8B	0.107516	-0.890057	4.08046	-0.218127	0.82733	NA
ENSG00000236341	0	NA	NA	NA	NA	NA
DAB1	17.4906	0.504226	0.607148	0.830483	0.406266	0.68567
ENSG00000227935	0	NA	NA	NA	NA	NA
RPS20P5	0	NA	NA	NA	NA	NA
DAB1-AS1	0	NA	NA	NA	NA	NA
HNRNPA1P6	0.62778	-2.08455	3.31506	-0.628814	0.529471	NA
RPS26P15	0	NA	NA	NA	NA	NA
ENSG00000235038	0	NA	NA	NA	NA	NA
ENSG00000230546	0	NA	NA	NA	NA	NA
ENSG00000233216	0	NA	NA	NA	NA	NA
OMA1	443.89	-0.218747	0.139824	-1.56445	0.117713	0.364005
ENSG00000286918	0	NA	NA	NA	NA	NA
ENSG00000270209	0	NA	NA	NA	NA	NA
RN7SL713P	0	NA	NA	NA	NA	NA
TACSTD2	1287.36	1.69377	0.588534	2.87796	0.00400261	0.0587381
ENSG00000185839	0	NA	NA	NA	NA	NA
MYSM1	1125.44	0.159436	0.0894845	1.78172	0.074795	0.284987
ENSG00000283445	0.116193	0	4.08046	0	1	NA
JUN	174.718	0.249689	0.310019	0.805397	0.420591	0.695276
LINC01135	38.7471	0.110696	0.43791	0.252783	0.800436	0.919065
ENSG00000272226	0.103725	0	4.08046	0	1	NA
ENSG00000231740	0	NA	NA	NA	NA	NA
LINC02777	0.111108	0	4.08046	0	1	NA
LINC01358	0	NA	NA	NA	NA	NA
PHBP3	0	NA	NA	NA	NA	NA
ENSG00000241042	0	NA	NA	NA	NA	NA
ENSG00000235215	0	NA	NA	NA	NA	NA
FGGY-DT	0.927756	0.971751	2.75229	0.35307	0.724036	NA
ENSG00000270457	0	NA	NA	NA	NA	NA
FGGY	43.4049	0.247795	0.37007	0.669589	0.50312	0.75314
MIR4711	0	NA	NA	NA	NA	NA
ENSG00000226883	0	NA	NA	NA	NA	NA
HOOK1	1968.81	0.730582	0.163664	4.46392	8.04743e-06	0.00109222
CYP2J2	2530.39	1.15529	0.225536	5.12241	3.01656e-07	9.61234e-05
RN7SL475P	0	NA	NA	NA	NA	NA
C1orf87	0	NA	NA	NA	NA	NA
PGBD4P8	0	NA	NA	NA	NA	NA
LINC02778	0	NA	NA	NA	NA	NA
LINC01748	2.74712	-0.44613	1.26035	-0.353974	0.723358	NA
ENSG00000231252	0.114941	-0.890057	4.08046	-0.218127	0.82733	NA
NFIA	38.243	-0.650065	0.381148	-1.70554	0.0880929	0.311599
NFIA-AS2	0	NA	NA	NA	NA	NA
NFIA-AS1	0	NA	NA	NA	NA	NA
ENSG00000284808	0	NA	NA	NA	NA	NA
ENSG00000287224	0	NA	NA	NA	NA	NA
ENSG00000223920	0	NA	NA	NA	NA	NA
TM2D1	319.154	0.187807	0.148082	1.26826	0.204706	0.488354
PATJ-DT	0.472789	-1.49097	3.98984	-0.373692	0.708634	NA
PATJ	1127.24	0.694305	0.186654	3.71974	0.000199431	0.00899467
RNU6-414P	0	NA	NA	NA	NA	NA
RNU6-1177P	0	NA	NA	NA	NA	NA
LAMTOR5P1	0	NA	NA	NA	NA	NA
RN7SL180P	0	NA	NA	NA	NA	NA
MIR3116-1	0	NA	NA	NA	NA	NA
MIR3116-2	0	NA	NA	NA	NA	NA
PIGPP2	0	NA	NA	NA	NA	NA
RPS15AP7	0	NA	NA	NA	NA	NA
L1TD1	0.111108	0	4.08046	0	1	NA
ENSG00000237227	0	NA	NA	NA	NA	NA
Y_RNA_24	0	NA	NA	NA	NA	NA
KANK4	908.715	-0.0156658	0.257821	-0.0607624	0.951548	0.98411
RNU6-371P	0	NA	NA	NA	NA	NA
USP1	2033.14	-0.0735716	0.107824	-0.68233	0.49503	0.748826
DOCK7	1240.27	-0.00342325	0.0835706	-0.0409623	0.967326	0.989597
ENSG00000270549	0	NA	NA	NA	NA	NA
ANGPTL3	0.781173	-3.12855	3.14659	-0.994265	0.320094	NA
ENSG00000278967	0	NA	NA	NA	NA	NA
ENSG00000213703	0	NA	NA	NA	NA	NA
DOCK7-DT	1.99317	-1.64272	1.59555	-1.02957	0.303214	NA
ATG4C	935.16	0.18801	0.121938	1.54185	0.12311	0.373381
ENSG00000234318	0.311175	0	4.08046	0	1	NA
ENSG00000237163	0	NA	NA	NA	NA	NA
LINC01739	0	NA	NA	NA	NA	NA
ENSG00000286455	0	NA	NA	NA	NA	NA
ENSG00000227485	0	NA	NA	NA	NA	NA
ENSG00000229225	0	NA	NA	NA	NA	NA
ENSG00000203605	0	NA	NA	NA	NA	NA
LINC00466	0.342283	1.03881	4.01396	0.258799	0.79579	NA
RNA5SP49	0	NA	NA	NA	NA	NA
ENSG00000228734	0	NA	NA	NA	NA	NA
RPSAP65	0	NA	NA	NA	NA	NA
FOXD3-AS1	9.23375	0.0506122	0.684653	0.0739238	0.941071	NA
FOXD3	3.75219	0.174941	1.04782	0.166956	0.867405	NA
MIR6068	0	NA	NA	NA	NA	NA
Y_RNA_25	0	NA	NA	NA	NA	NA
ENSG00000236674	0	NA	NA	NA	NA	NA
ALG6	802.531	0.022768	0.11814	0.19272	0.847178	0.938195
ITGB3BP	551.215	0.012898	0.13858	0.0930729	0.925846	0.973466
ENSG00000286429	0.107516	-0.890057	4.08046	-0.218127	0.82733	NA
EFCAB7	86.259	-0.0141281	0.280178	-0.0504256	0.959783	0.986708
RN7SL488P	0	NA	NA	NA	NA	NA
RNU7-123P	0	NA	NA	NA	NA	NA
DLEU2L	4.46814	-0.801345	1.06392	-0.753197	0.451332	NA
ENSG00000276884	0	NA	NA	NA	NA	NA
ENSG00000278287	0	NA	NA	NA	NA	NA
ENSG00000277565	0	NA	NA	NA	NA	NA
ENSG00000275823	0	NA	NA	NA	NA	NA
ENSG00000277689	0	NA	NA	NA	NA	NA
ENSG00000274199	0	NA	NA	NA	NA	NA
PGM1	2920.89	-0.169571	0.13686	-1.23902	0.21534	0.501024
RN7SL130P	0	NA	NA	NA	NA	NA
ROR1	47.2935	0.253194	0.391062	0.647452	0.517339	0.762817
ENSG00000177452	0	NA	NA	NA	NA	NA
CFL1P3	0	NA	NA	NA	NA	NA
RNU6-809P	0	NA	NA	NA	NA	NA
Y_RNA_26	0	NA	NA	NA	NA	NA
ROR1-AS1	0	NA	NA	NA	NA	NA
ENSG00000284928	0	NA	NA	NA	NA	NA
UBE2U	0	NA	NA	NA	NA	NA
RNU7-62P	0	NA	NA	NA	NA	NA
CACHD1	14.6306	0.32005	0.793979	0.403096	0.686878	0.862926
MIR4794	0	NA	NA	NA	NA	NA
RAVER2	233.603	0.186361	0.158034	1.17925	0.238298	0.529159
JAK1	870.017	0.238478	0.14511	1.64343	0.100293	0.334213
ENSG00000234784	0	NA	NA	NA	NA	NA
ENSG00000233877	0	NA	NA	NA	NA	NA
LINC01359	0	NA	NA	NA	NA	NA
SLC2A3P2	0	NA	NA	NA	NA	NA
ENSG00000272506	0	NA	NA	NA	NA	NA
RNU6-1176P	0	NA	NA	NA	NA	NA
MIR3671	0	NA	NA	NA	NA	NA
MIR101-1	0	NA	NA	NA	NA	NA
ENSG00000288804	0	NA	NA	NA	NA	NA
ENSG00000235804	0	NA	NA	NA	NA	NA
MRPS21P1	0	NA	NA	NA	NA	NA
AK4	2429.52	1.7147	0.247053	6.94064	3.90329e-12	1.43036e-08
RPS29P7	0	NA	NA	NA	NA	NA
DNAJC6	1520.34	0.272971	0.197486	1.38223	0.166902	0.438353
ENSG00000229294	0	NA	NA	NA	NA	NA
COX6CP13	0	NA	NA	NA	NA	NA
RNU2-15P	0	NA	NA	NA	NA	NA
LEPROT	3619.78	0.310396	0.126891	2.44617	0.0144383	0.120316
LEPR	201.775	0.136365	0.226941	0.600884	0.547917	0.779442
ENSG00000237852	2.82623	1.79857	1.2608	1.42654	0.153713	NA
ENSG00000224570	0	NA	NA	NA	NA	NA
ENSG00000285079	0	NA	NA	NA	NA	NA
RN7SL854P	0	NA	NA	NA	NA	NA
PDE4B	1087.84	-0.664277	0.18664	-3.55914	0.000372075	0.0138292
PDE4B-AS1	0	NA	NA	NA	NA	NA
RNU4-88P	0	NA	NA	NA	NA	NA
SGIP1	0.750199	1.51909	2.85257	0.532533	0.594357	NA
MIR3117	0	NA	NA	NA	NA	NA
ENSG00000248458	0	NA	NA	NA	NA	NA
DYNLT5	0.433008	-0.890057	3.21276	-0.277038	0.781751	NA
INSL5	0	NA	NA	NA	NA	NA
DNAI4	18.1505	-0.30458	0.522532	-0.582893	0.559965	0.787335
ENSG00000231080	0	NA	NA	NA	NA	NA
MIER1	2108.34	0.136892	0.124439	1.10007	0.2713	0.564537
ENSG00000289394	0.222216	0	4.08046	0	1	NA
SLC35D1	690.152	-0.0511613	0.146716	-0.34871	0.727307	0.883473
C1orf141	0	NA	NA	NA	NA	NA
ENSG00000252433	0	NA	NA	NA	NA	NA
ENSG00000275678	0.641213	-2.74632	3.3136	-0.828804	0.407215	NA
IL23R	0.222457	-1.82277	4.0346	-0.451786	0.651423	NA
RNU6-586P	0	NA	NA	NA	NA	NA
RNU4ATAC4P	0	NA	NA	NA	NA	NA
DNAJB6P4	0	NA	NA	NA	NA	NA
IL12RB2	3.25944	0.723611	1.15865	0.624528	0.532281	NA
SERBP1	16527.7	-0.106011	0.0910418	-1.16442	0.244253	0.535713
RNU6-387P	0	NA	NA	NA	NA	NA
LINC01702	0	NA	NA	NA	NA	NA
RNU6-1031P	0	NA	NA	NA	NA	NA
ENSG00000238139	0	NA	NA	NA	NA	NA
RN7SL392P	0	NA	NA	NA	NA	NA
HNRNPCP9	0	NA	NA	NA	NA	NA
GADD45A	305.902	-0.295002	0.230482	-1.27994	0.200567	0.482422
GNG12	7104.9	-0.0200286	0.139594	-0.143477	0.885914	0.958254
RNU7-80P	0	NA	NA	NA	NA	NA
GNG12-AS1	2.52845	0.644562	1.77007	0.364145	0.71575	NA
ENSG00000235055	0	NA	NA	NA	NA	NA
DIRAS3	3.4791	0.764473	1.43231	0.533732	0.593527	NA
ARL5AP3	0	NA	NA	NA	NA	NA
WLS	2185.54	-0.111322	0.225583	-0.493485	0.62167	0.823493
CTBP2P8	0	NA	NA	NA	NA	NA
MIR1262	0	NA	NA	NA	NA	NA
RPS7P4	0	NA	NA	NA	NA	NA
COX6B1P7	0	NA	NA	NA	NA	NA
ELOCP18	0	NA	NA	NA	NA	NA
ENSG00000229440	0	NA	NA	NA	NA	NA
RPE65	0.696773	1.111	3.4361	0.323332	0.746444	NA
DEPDC1	2231.02	-0.158252	0.151783	-1.04262	0.297124	0.591743
ENSG00000233589	8.07328	-1.72455	0.779271	-2.21303	0.0268955	NA
DEPDC1-AS1	1.12066	0.0883927	1.90741	0.0463418	0.963038	NA
TXNP2	0	NA	NA	NA	NA	NA
ENSG00000285041	0.866955	0.973303	2.38629	0.407873	0.683367	NA
ENSG00000285407	4.74821	-1.89051	1.04583	-1.80767	0.0706584	NA
ENSG00000285473	0.311175	0	4.08046	0	1	NA
LINC01707	0	NA	NA	NA	NA	NA
LINC02791	0	NA	NA	NA	NA	NA
LINC01758	0	NA	NA	NA	NA	NA
ENSG00000287453	0	NA	NA	NA	NA	NA
LRRC7	3.82514	-0.0291663	0.957755	-0.0304528	0.975706	NA
SGO1P1	0	NA	NA	NA	NA	NA
ENSG00000287283	0	NA	NA	NA	NA	NA
RN7SL538P	0	NA	NA	NA	NA	NA
PIN1P1	0	NA	NA	NA	NA	NA
LRRC7-AS1	0	NA	NA	NA	NA	NA
LRRC40	879.057	-0.00910222	0.100606	-0.0904739	0.927911	0.973849
RN7SL242P	0.101982	-0.890057	4.08046	-0.218127	0.82733	NA
SRSF11	4694.66	-0.0480365	0.0934601	-0.513978	0.607267	0.81499
ENSG00000228988	0	NA	NA	NA	NA	NA
[truncated: 59,553 more rows]
