# Supplementary material for: Comparative analysis of the syncytiotrophoblast in placenta tissue and trophoblast organoids using snRNA sequencing
Source: bioRxiv preprint, doi:10.1101/2024.07.01.601571, version 2 (2025-02-19)
Supplement: SupplementalTable_Figure6F [file 601571_file09.xlsx]

## Sheet: STBoutvsterm
gene name	log2FoldChange	pvalue	padj	Gotermterm	GotermSTBout	pvalue_transformed
AL627309.1	0	1	1	None	None	0
AL627309.5	-0.983343	NA	NA	None	None	NA
AP006222.2	-2.59088	0.525409	NA	None	None	0.279503
AL732372.1	0	NA	NA	None	None	NA
AC114498.1	-6.19905	1.2145e-05	4.32654e-05	None	None	4.9156
LINC01409	0.677504	0.672781	0.785462	None	None	0.172126
LINC01128	-0.142594	0.929419	0.988669	None	None	0.0317883
LINC00115	3.26566	0.000396463	0.0010982	None	None	3.4018
FAM41C	-6.465	0.129367	0.201657	None	None	0.888175
AL645608.6	NA	NA	NA	None	None	NA
NOC2L	2.48493	1.94859e-12	2.02444e-11	None	ribosome biogenesis	11.7103
KLHL17	-5.67195	0.00327865	0.00761888	None	None	2.48431
PLEKHN1	3.80381	1.63059e-05	5.70678e-05	None	None	4.78766
AL645608.7	0	1	1	None	None	0
HES4	5.81696	6.55682e-06	2.43719e-05	None	None	5.18331
ISG15	3.75883	1.78729e-06	7.27495e-06	None	None	5.74781
AGRN	6.438	5.8709e-05	0.000187802	None	None	4.2313
RNF223	4.81197	0.00584544	0.0128857	None	None	2.23318
C1orf159	0.784231	0.00819854	0.0174775	None	None	2.08626
AL390719.3	8.92393	8.56102e-13	9.29377e-12	None	None	12.0675
TTLL10-AS1	NA	NA	NA	None	None	NA
TTLL10	NA	NA	NA	None	None	NA
TNFRSF18	NA	NA	NA	None	None	NA
TNFRSF4	NA	NA	NA	None	None	NA
SDF4	0.623347	0.00223751	0.00536428	None	None	2.65023
B3GALT6	5.52393	0.000325852	0.000916486	None	None	3.48698
C1QTNF12	0.619478	0.764488	0.865176	None	None	0.116629
AL162741.1	NA	NA	NA	None	None	NA
UBE2J2	-0.593148	0.0115751	0.0238347	None	None	1.93648
LINC01786	-3.38848	0.438893	NA	None	None	0.357642
SCNN1D	4.75356	0.157845	0.239285	None	None	0.801769
ACAP3	-1.4203	6.23683e-07	2.69856e-06	None	None	6.20504
PUSL1	9.16448	7.40745e-14	9.35766e-13	None	None	13.1303
INTS11	-1.37801	7.70976e-06	2.82916e-05	None	None	5.11296
AL139287.1	NA	NA	NA	None	None	NA
CPTP	1.25703	0.39638	0.518543	None	None	0.401888
TAS1R3	0	1	NA	None	None	0
DVL1	0.454364	0.0992408	0.160579	None	None	1.00331
MXRA8	5.84414	9.5153e-05	0.000294548	None	None	4.02158
AURKAIP1	1.60969	1.52337e-07	7.2611e-07	None	None	6.81719
CCNL2	-0.19592	0.468093	0.593306	None	None	0.329667
MRPL20-AS1	1.20981	0.447829	0.572451	None	None	0.348888
MRPL20	0.084163	0.622711	0.739842	None	None	0.205713
AL391244.2	-1.74957	0.387035	0.508733	None	None	0.412249
ANKRD65	-4.43096	0.084047	0.138818	None	None	1.07548
TMEM88B	NA	NA	NA	None	None	NA
LINC01770	-7.28474	0.0248942	0.047499	None	None	1.6039
VWA1	1.83364	1.06865e-09	7.25557e-09	None	None	8.97116
ATAD3C	-1.24431	0.0758932	0.127443	None	None	1.1198
ATAD3B	-0.0904213	0.633357	0.748733	None	None	0.198351
ATAD3A	0.52493	0.0184437	0.0362391	None	None	1.73415
TMEM240	-6.95254	0.0450783	0.0805215	None	None	1.34603
SSU72	0.38323	0.0956582	0.15562	None	None	1.01928
AL645728.1	7.65688	1.7789e-09	1.16722e-08	None	None	8.74985
AL691432.2	0.623929	0.432437	0.556453	None	None	0.364077
MIB2	-0.00225995	0.994193	1	None	None	0.00252933
MMP23B	6.05803	0.00575827	0.0127158	None	None	2.23971
CDK11B	-0.257081	0.481232	0.605573	None	None	0.317645
FO704657.1	-4.51973	NA	NA	None	None	NA
SLC35E2B	-0.920884	0.0107451	0.0223129	None	None	1.96879
CDK11A	0.384568	0.289456	0.400796	None	None	0.538417
SLC35E2A	-2.28725	6.55191e-06	2.43586e-05	None	None	5.18363
NADK	0.410862	0.0817258	0.135619	None	None	1.08764
GNB1	-0.82472	2.48522e-06	9.89565e-06	None	None	5.60463
AL109917.1	-2.59822	0.555523	NA	None	None	0.255298
CALML6	NA	NA	NA	None	None	NA
CFAP74	7.95911	1.47942e-09	9.80307e-09	None	None	8.82991
PRKCZ	0.263594	0.354083	0.473428	None	None	0.450895
AL590822.2	4.81178	1.764e-07	8.32521e-07	None	None	6.7535
PRKCZ-AS1	6.57236	0.00303297	0.00709632	None	None	2.51813
FAAP20	1.70334	2.5344e-10	1.89599e-09	None	None	9.59613
AL590822.1	1.00331	0.620488	0.737897	None	None	0.207267
SKI	0.0655087	0.739385	0.844699	None	None	0.13113
AL590822.3	0.305999	0.944085	NA	None	None	0.024989
MORN1	-0.589539	0.00388075	0.0088665	None	None	2.41108
RER1	1.77352	2.47996e-19	6.064e-18	None	None	18.6056
PEX10	1.27397	4.95822e-11	4.19064e-10	None	None	10.3047
PLCH2	-1.63643	0.710424	NA	None	None	0.148482
PANK4	0.0878668	0.639297	0.754248	None	None	0.194298
AL139246.5	2.11901	0.120122	0.189091	None	None	0.920377
TNFRSF14-AS1	-2.59822	0.555523	NA	None	None	0.255298
TNFRSF14	-8.47239	3.40074e-07	1.53102e-06	positive regulation of cytokine production	None	6.46843
PRXL2B	NA	NA	NA	None	None	NA
TTC34	-2.59822	0.555523	NA	None	None	0.255298
PRDM16-DT	NA	NA	NA	None	None	NA
PRDM16	-3.5427	0.416959	NA	None	None	0.379907
ARHGEF16	0.911612	0.0780746	0.130474	None	None	1.10749
MEGF6	-2.53933	0.138419	0.213632	None	None	0.858804
AL513320.1	0	1	NA	None	None	0
TPRG1L	0.110293	0.736582	0.842358	None	None	0.132779
WRAP73	0.933868	0.00942856	0.0198079	None	None	2.02555
TP73	2.41641	0.0786743	0.131324	None	None	1.10417
CCDC27	NA	NA	NA	None	None	NA
LRRC47	-0.2819	0.0598628	0.103379	None	None	1.22284
CEP104	-1.98636	2.81074e-09	1.77984e-08	None	None	8.55118
DFFB	-0.479401	0.418226	0.54135	None	None	0.378589
C1orf174	-0.468672	0.079749	0.132908	None	None	1.09827
LINC01134	-1.62714	0.269867	0.377926	None	None	0.568851
LINC02780	NA	NA	NA	None	None	NA
AJAP1	-2.59822	0.555523	0.677536	cell-substrate adhesion	None	0.255298
NPHP4	1.15453	0.313094	0.428008	None	None	0.504326
KCNAB2	-2.38989	0.245734	0.349209	None	None	0.609535
CHD5	-3.97964	0.310532	NA	None	None	0.507893
RPL22	2.02835	1.07335e-07	5.25935e-07	None	cytoplasmic translation	6.96926
RNF207	0.86704	0.0135948	0.027515	None	None	1.86663
ICMT	1.51596	7.43868e-12	7.11483e-11	None	None	11.1285
LINC00337	6.21185	4.43662e-08	2.30704e-07	None	None	7.35295
GPR153	2.25622	0.245134	0.348504	None	None	0.610597
ACOT7	1.25619	0.000190986	0.000560345	None	None	3.719
AL031848.2	7.06227	0.000514678	0.00139625	None	None	3.28846
HES2	1.58234	2.48812e-08	1.34094e-07	None	None	7.60413
ESPN	4.90075	3.54767e-10	2.59329e-09	None	None	9.45006
TNFRSF25	-0.563106	0.200791	0.294062	None	None	0.697257
PLEKHG5	-0.166424	0.635769	0.751055	None	None	0.1967
NOL9	-0.564525	0.00177282	0.00435183	None	None	2.75133
TAS1R1	4.09504	0.227057	NA	None	None	0.643864
ZBTB48	0.617457	0.014014	0.0282867	None	None	1.85344
KLHL21	-0.426998	0.123662	0.194027	None	None	0.907762
PHF13	-0.164499	0.638782	0.753855	None	None	0.194648
THAP3	-0.0775426	0.771803	0.871005	None	None	0.112494
DNAJC11	0.407744	0.0108742	0.0225531	None	None	1.9636
CAMTA1-DT	5.78587	2.16306e-07	1.00553e-06	None	None	6.66493
CAMTA1	-0.478335	0.106352	0.170332	None	None	0.973256
VAMP3	-0.589603	0.00124983	0.00315816	None	None	2.90315
Z98884.2	NA	NA	NA	None	None	NA
PER3	-1.42743	0.0565812	0.0983817	None	None	1.24733
Z98884.1	1.17078	0.76913	NA	None	None	0.114
TNFRSF9	-0.674644	0.878344	NA	None	None	0.0563352
PARK7	1.25346	1.2077e-10	9.54727e-10	None	oxidative phosphorylation	9.91804
AL034417.4	3.50599	1.90755e-05	6.5992e-05	None	None	4.71952
AL034417.3	0.219902	0.794381	0.890096	None	None	0.0999713
ERRFI1	1.0516	0.035059	0.0644376	None	None	1.4552
AL034417.2	-0.0565447	0.938764	0.995631	None	None	0.0274438
LINC01714	-1.8635	0.176778	0.263732	None	None	0.752571
SLC45A1	1.88982	0.279633	0.389435	None	None	0.553411
RERE	0.192999	0.124906	0.195748	None	None	0.903418
RERE-AS1	8.36153	4.49071e-11	3.81634e-10	None	None	10.3477
ENO1	4.20787	6.07031e-42	9.46969e-40	None	carbohydrate derivative catabolic process	41.2168
CA6	NA	NA	NA	None	None	NA
SLC2A7	0	1	NA	None	None	0
SLC2A5	-2.22395	0.0180619	0.0355549	None	None	1.74324
GPR157	-0.310861	0.203534	0.297517	None	None	0.691364
MIR34AHG	2.01361	5.27059e-14	6.76869e-13	None	None	13.2781
LNCTAM34A	1.98761	0.134109	0.207945	None	None	0.872543
H6PD	-2.72637	1.23987e-08	7.06433e-08	None	None	7.90662
SPSB1	1.87948	4.76627e-05	0.000154704	None	None	4.32182
SLC25A33	4.42053	8.15926e-49	1.86587e-46	None	oxidative phosphorylation	48.0883
TMEM201	3.5481	0.00827295	0.0176212	None	None	2.08234
PIK3CD	1.7368	0.0319535	0.0593149	None	None	1.49548
PIK3CD-AS2	6.10316	0.000611002	0.00163682	None	None	3.21396
CLSTN1	-0.415729	0.0600139	0.103631	None	None	1.22175
CTNNBIP1	-0.612534	0.163235	0.246331	None	None	0.787187
LZIC	-0.0792748	0.563836	0.685556	None	None	0.248847
NMNAT1	-0.823587	7.37377e-05	0.000231895	None	None	4.13231
RBP7	-0.90288	0.775856	NA	None	None	0.110219
UBE4B	-0.353915	0.0740538	0.124718	None	None	1.13045
KIF1B	-0.151708	0.533365	0.657283	None	None	0.272976
AL139424.3	5.81357	NA	NA	None	None	NA
AL139424.2	-0.674645	0.86363	0.943164	None	None	0.0636722
PGD	3.04162	3.03917e-35	3.0889e-33	None	carbohydrate derivative catabolic process	34.5172
CENPS	4.58144	0.0182225	0.0358465	None	None	1.73939
DFFA	0.558992	0.00676671	0.0146976	None	None	2.16962
PEX14	-0.462229	0.0282095	0.05305	None	None	1.5496
CASZ1	-2.34891	0.00418295	0.009503	None	None	2.37852
AL139423.1	NA	NA	NA	None	None	NA
C1orf127	-0.674644	0.878344	NA	None	None	0.0563352
TARDBP	-0.444268	NA	NA	None	None	NA
AL109811.2	-1.05561	NA	NA	None	None	NA
SRM	5.6725	1.40535e-24	5.90421e-23	None	None	23.8522
EXOSC10	-0.47403	0.0284615	0.053499	None	None	1.54574
AL109811.1	8.62004	3.01353e-12	3.05513e-11	None	None	11.5209
EXOSC10-AS1	NA	NA	NA	None	None	NA
MTOR	-1.07222	2.15011e-12	2.21664e-11	mesenchyme development	None	11.6675
ANGPTL7	5.66841	0.0459477	0.081871	None	None	1.33774
UBIAD1	0.646175	0.009501	0.0199497	None	None	2.02223
AL031731.1	NA	NA	NA	None	None	NA
FBXO44	-0.902122	0.685943	0.796808	None	None	0.163712
FBXO6	-0.168838	NA	NA	None	None	NA
MAD2L2	-2.84664	0.150943	0.230084	mesenchyme development	None	0.821187
DRAXIN	-3.38848	0.438893	NA	None	None	0.357641
AGTRAP	2.15717	0.00170632	0.00419883	None	None	2.76794
C1orf167	0	1	NA	None	None	0
MTHFR	0.129768	0.436331	0.560245	None	None	0.360184
CLCN6	0.244535	0.166738	0.250742	None	None	0.777966
NPPA	8.05076	4.24254e-09	2.60534e-08	None	None	8.37237
AL021155.5	2.38124	0.0786842	0.13133	None	None	1.10411
KIAA2013	0.723015	0.000763159	0.00200756	None	None	3.11738
PLOD1	2.02605	2.81316e-11	2.46461e-10	None	None	10.5508
AL096840.2	0	1	1	None	None	0
MFN2	-0.857281	0.00281893	0.00663255	None	None	2.54992
MIIP	0.924306	0.000116466	0.000355439	None	None	3.9338
TNFRSF8	6.69095	6.42342e-08	3.2446e-07	None	None	7.19223
TNFRSF1B	6.20867	2.97607e-51	7.77799e-49	None	None	50.5264
VPS13D	-0.303245	0.0295978	0.0553607	None	None	1.52874
DHRS3	-3.79604	1.34672e-11	1.2392e-10	None	None	10.8707
AC254633.1	NA	NA	NA	None	None	NA
AADACL4	NA	NA	NA	None	None	NA
AADACL3	0	1	NA	None	None	0
C1orf158	0	1	NA	None	None	0
HNRNPCL3	NA	NA	NA	None	None	NA
LRRC38	-2.59822	0.555523	NA	None	None	0.255298
PDPN	-8.71747	3.23311e-05	0.000107899	cell-substrate adhesion	None	4.49038
PRDM2	-0.316363	0.0233723	0.0448888	None	None	1.6313
KAZN	-1.06276	7.16278e-05	0.000225648	None	None	4.14492
AL357873.1	9.76596	1.34262e-13	1.62764e-12	None	None	12.872
KAZN-AS1	7.99865	3.61129e-09	2.24301e-08	None	None	8.44234
TMEM51-AS1	-2.18883	0.106796	0.170978	None	None	0.971446
TMEM51	-0.323343	0.50261	0.626716	None	None	0.298769
C1orf195	3.22865	0.0345004	0.0635444	None	None	1.46218
FHAD1	1.99983	0.0527365	0.0925094	None	None	1.27789
AL031283.2	-3.38848	0.438893	NA	None	None	0.357642
AL031283.1	-4.17842	0.28826	NA	None	None	0.540216
EFHD2	-0.534717	0.220724	0.318915	None	None	0.656151
CTRC	-3.33501	0.204342	0.29846	None	None	0.689642
CELA2A	0	NA	NA	None	None	NA
CELA2B	6.96349	2.89002e-06	1.14014e-05	None	None	5.5391
CASP9	-0.484518	0.0970556	0.157639	None	None	1.01298
DNAJC16	-0.912479	1.62393e-08	9.04761e-08	None	None	7.78943
AGMAT	5.66402	1.56832e-10	1.21155e-09	None	None	9.80457
AL121992.1	2.23586	0.378897	0.499766	None	None	0.421478
DDI2	-0.302824	0.0979049	0.158813	None	None	1.0092
PLEKHM2	-1.6788	4.8739e-09	2.96859e-08	None	None	8.31212
AL450998.3	7.3404	6.36816e-08	3.22154e-07	None	None	7.19599
SLC25A34	-8.74897	8.26344e-37	9.23852e-35	None	None	36.0828
SLC25A34-AS1	-2.59823	0.46092	0.585689	None	None	0.336374
TMEM82	0	1	1	None	None	0
FBLIM1	-2.33725	4.41545e-11	3.75715e-10	None	None	10.355
UQCRHL	-7.03632	0.0692866	0.117644	None	None	1.15935
AL450998.2	-1.06992	0.000204247	0.000596555	None	None	3.68984
SPEN	-0.0907653	0.681718	0.792999	None	None	0.166395
ZBTB17	0.600417	0.00253011	0.00600565	None	None	2.59686
HSPB7	-0.674649	0.74839	0.851555	None	None	0.125872
CLCNKA	-8.18699	9.86662e-05	0.00030458	None	None	4.00583
EPHA2	2.93007	4.76505e-05	0.000154689	None	None	4.32193
AL451042.1	0.106126	0.980668	NA	None	None	0.00847789
ARHGEF19	1.09992	0.798768	NA	None	None	0.0975796
AL109627.1	-2.59822	0.555523	NA	None	None	0.255298
CPLANE2	0	1	NA	None	None	0
FBXO42	-0.815624	0.000110002	0.000336784	None	None	3.9586
SZRD1	-0.154477	0.355659	0.475062	None	None	0.448966
SPATA21	8.13314	3.52334e-09	2.19312e-08	None	None	8.45305
NECAP2	0.270308	0.0751264	0.126334	None	None	1.12421
LINC01772	-1.18559	0.213213	0.309775	None	None	0.671187
NBPF1	0.502656	0.0518111	0.0910767	None	None	1.28558
CROCC	1.13179	0.0127892	0.026047	None	None	1.89316
BX284668.5	-1.22395	0.581258	0.70198	None	None	0.235631
BX284668.6	4.88139	0.0530312	0.0929698	None	None	1.27547
MFAP2	-0.712619	0.478465	0.602869	None	None	0.32015
AL049569.1	8.33001	1.4512e-20	4.09592e-19	None	None	19.8383
ATP13A2	1.10275	3.49162e-08	1.83941e-07	None	None	7.45697
SDHB	-0.036459	0.821048	0.910246	None	None	0.0856312
PADI2	3.52047	0.00155919	0.00386276	None	None	2.8071
PADI1	8.30926	1.87567e-10	1.43248e-09	None	None	9.72684
PADI3	-0.674646	0.856801	0.937946	None	None	0.0671202
PADI4	-3.38848	0.438893	NA	None	None	0.357642
RCC2	-0.157661	0.543001	0.666511	None	None	0.265199
ARHGEF10L	-0.478401	0.288881	0.400099	None	None	0.539282
LINC02810	NA	NA	NA	None	None	NA
IGSF21	-5.38139	0.208665	NA	None	None	0.680551
PAX7	NA	NA	NA	None	None	NA
ALDH4A1	-0.943359	0.541099	0.664761	None	None	0.266724
IFFO2	0.376173	0.230808	0.330942	None	None	0.63675
AL137127.1	-0.674644	0.878344	NA	None	None	0.0563352
UBR4	0.103007	0.531186	0.6552	None	None	0.274753
EMC1-AS1	0.0243243	NA	NA	None	None	NA
EMC1	1.21473	1.38923e-11	1.27598e-10	None	None	10.8572
MRTO4	1.8212	1.33769e-29	8.54594e-28	None	ribosome biogenesis	28.8736
AKR7A3	0	1	1	None	None	0
AKR7A2	2.75748	0.000102534	0.000315937	None	None	3.98913
SLC66A1	0.371865	NA	NA	None	None	NA
CAPZB	-0.474005	1.23056e-06	5.11225e-06	None	None	5.9099
MICOS10	1.0569	NA	NA	None	None	NA
NBL1	-2.16829	0.212132	0.308338	None	None	0.673395
TMCO4	-1.47358	0.000237538	0.000685632	None	None	3.62427
OTUD3	0.786195	0.000134983	0.000406767	None	None	3.86972
PLA2G2A	-4.08423	0.0316308	0.0587809	None	None	1.49989
PLA2G5	-9.28073	1.39784e-10	1.09074e-09	None	None	9.85454
PLA2G2F	0.160673	0.870897	0.948107	None	None	0.060033
UBXN10	0	1	NA	None	None	0
VWA5B1	-3.97364	0.271639	0.379905	None	None	0.566009
LINC01141	0.893453	0.836324	NA	None	None	0.0776255
CAMK2N1	2.21857	0.047391	0.0841298	None	None	1.3243
MUL1	0.487298	0.0475308	0.0843631	None	None	1.32303
CDA	-0.875188	0.218312	0.315861	None	None	0.660922
PINK1	-1.7393	8.70178e-11	7.0497e-10	None	None	10.0604
PINK1-AS	-0.294599	0.754673	0.856912	None	None	0.122241
DDOST	1.83591	6.40983e-09	3.83446e-08	None	None	8.19315
KIF17	1.27014	0.00488313	0.0109564	None	None	2.3113
SH2D5	-0.393699	0.358983	0.478739	None	None	0.444927
HP1BP3	-1.07078	2.64267e-09	1.68242e-08	None	None	8.57796
EIF4G3	1.78469	4.4456e-17	8.39242e-16	None	None	16.3521
ECE1	3.38956	1.31395e-12	1.39535e-11	None	None	11.8814
NBPF3	-1.406	8.87737e-13	9.62026e-12	None	None	12.0517
ALPL	9.86549	2.67502e-10	1.99231e-09	None	None	9.57267
RAP1GAP	-1.36722	3.42302e-12	3.43737e-11	None	None	11.4656
USP48	0.374567	0.00947258	0.0198942	None	None	2.02353
LDLRAD2	0	1	NA	None	None	0
HSPG2	-2.46578	4.73053e-12	4.65512e-11	None	None	11.3251
CELA3A	NA	NA	NA	None	None	NA
LINC00339	-1.43878	0.310912	0.4254	None	None	0.507363
CDC42	-0.00815234	0.931334	0.990182	None	None	0.0308947
CDC42-AS1	0.168063	0.723412	0.830459	None	None	0.140614
CDC42-IT1	0.647721	NA	NA	None	None	NA
WNT4	4.89985	6.65447e-07	2.8683e-06	None	None	6.17689
AL445253.1	-4.54901	0.00291056	0.00682977	None	None	2.53602
ZBTB40	0.535099	0.0249313	0.0475562	None	None	1.60325
ZBTB40-IT1	NA	NA	NA	None	None	NA
C1QA	-9.64695	5.83265e-06	2.18782e-05	None	None	5.23413
C1QC	-7.66685	0.071501	0.120894	None	None	1.14569
C1QB	-8.38075	0.0329994	0.0610761	None	None	1.48149
EPHB2	-6.62335	3.27887e-24	1.32498e-22	positive regulation of cytokine production	None	23.4843
KDM1A	0.751688	0.000208211	0.000607163	None	None	3.6815
AL031428.1	1.85035	1.04673e-08	6.04259e-08	None	None	7.98016
LUZP1	-0.23132	0.426455	0.54981	None	None	0.370126
LINC01355	-1.10746	5.93121e-10	4.18365e-09	None	None	9.22686
AL109936.6	1.74801	0.0148031	0.0297184	None	None	1.82965
HNRNPR	-0.411438	0.00678058	0.0147246	None	None	2.16873
ZNF436	2.27857	3.54747e-14	4.65077e-13	None	None	13.4501
ZNF436-AS1	-0.0287077	0.918452	0.980839	None	None	0.0369436
TCEA3	0.294527	0.764854	0.865444	None	None	0.116421
ASAP3	-2.16142	2.31439e-07	1.07195e-06	None	None	6.63556
E2F2	4.55728	1.30589e-05	4.62996e-05	None	None	4.88409
ID3	5.77537	8.17913e-27	4.16701e-25	None	None	26.0873
AL450043.1	8.87473	1.78992e-09	1.1733e-08	None	None	8.74717
MDS2	6.24723	2.68045e-08	1.43537e-07	None	None	7.57179
RPL11	3.06175	5.69302e-08	2.90335e-07	None	ribosome biogenesis	7.24466
ELOA-AS1	1.7035	6.45326e-15	9.34956e-14	None	None	14.1902
ELOA	0.869471	1.32985e-07	6.40086e-07	None	None	6.8762
PITHD1	0.630372	0.0119057	0.024448	None	None	1.92425
LYPLA2	0.272242	0.268433	0.376207	None	None	0.571164
GALE	-0.418571	0.281722	0.391965	None	None	0.550179
HMGCL	-0.012938	0.947881	1	None	None	0.0232463
FUCA1	1.09037	0.000281578	0.000801707	None	None	3.5504
CNR2	-5.35723	NA	NA	None	None	NA
PNRC2	-0.467028	0.00353227	0.00814522	None	None	2.45195
SRSF10	-0.246704	0.064606	0.110574	None	None	1.18973
AL591178.1	0.210861	0.961521	NA	None	None	0.0170412
MYOM3	0	1	NA	None	None	0
IFNLR1	1.41035	0.00143683	0.00359189	None	None	2.8426
AL138902.1	-2.44552	0.118434	0.186887	None	None	0.926522
GRHL3	1.50233	0.0571161	0.0992319	None	None	1.24324
STPG1	0.99732	0.000160762	0.000478153	None	None	3.79382
NIPAL3	-0.676141	0.0509832	0.0897625	None	None	1.29257
RCAN3AS	-1.51274	4.60236e-07	2.02754e-06	None	None	6.33702
RCAN3	-0.416819	0.0256508	0.0487391	None	None	1.5909
NCMAP-DT	-9.81062	1.54072e-08	8.6222e-08	None	None	7.81228
NCMAP	-5.2603	3.5679e-35	3.60806e-33	None	None	34.4476
SRRM1	-0.559909	0.0402716	0.0729145	None	None	1.395
AL445648.1	4.54143	0.00831963	0.0177061	None	None	2.0799
CLIC4	0.54798	0.000325406	0.000915612	None	None	3.48758
RUNX3	1.02285	0.51401	0.637964	None	None	0.289028
AL050344.1	-4.40113	0.307444	NA	None	None	0.512235
SYF2	0.552131	0.00360252	0.00829371	None	None	2.44339
AL031432.4	-0.186715	0.907907	0.973037	None	None	0.0419586
AL031432.5	0	1	NA	None	None	0
RSRP1	-0.482142	0.0392868	0.0713608	None	None	1.40575
AL031432.3	0	1	NA	None	None	0
RHD	3.54078	1.11483e-05	3.98982e-05	None	None	4.95279
TMEM50A	-0.00117779	0.994145	1	None	None	0.00255041
RHCE	2.03922	5.79962e-06	2.17705e-05	None	None	5.2366
MACO1	-0.563635	0.00306838	0.00717083	None	None	2.51309
LDLRAP1	-1.04569	3.3242e-08	1.75765e-07	None	None	7.47831
AL606491.1	-6.82133	6.40293e-05	0.000203454	None	None	4.19362
MAN1C1	-2.44009	8.82181e-18	1.80968e-16	None	None	17.0544
AL031280.1	2.21003	0.000202564	0.000591899	None	None	3.69344
SELENON	0.261176	0.679123	0.79085	None	None	0.168051
AL020996.1	-0.331902	0.848817	0.931472	None	None	0.0711857
MTFR1L	-2.19976	2.13997e-72	1.38918e-69	None	None	71.6696
AUNIP	1.37802	0.000244069	0.000702968	None	None	3.61249
AL033528.2	7.28325	3.90339e-06	1.50742e-05	None	None	5.40856
PAQR7	-3.45499	9.31793e-41	1.33939e-38	None	None	40.0307
STMN1	0.311906	0.521184	0.645514	None	None	0.283009
PAFAH2	-2.12781	1.40774e-20	4.00133e-19	None	None	19.8515
EXTL1	1.50175	0.0810743	0.134738	None	None	1.09112
SLC30A2	-0.216601	0.363844	0.483907	None	None	0.439084
AL391650.2	-3.372	0.0428821	0.0769968	None	None	1.36772
TRIM63	2.34094	0.224524	0.323361	None	None	0.648737
PDIK1L	-0.587335	0.0489828	0.0866957	None	None	1.30996
FAM110D	NA	NA	NA	None	None	NA
ZNF593	2.99182	0.00074014	0.0019516	None	ribosome biogenesis	3.13069
CNKSR1	0.0284809	0.89751	0.964926	None	None	0.0469608
CATSPER4	-7.58435	0.0746319	0.125597	None	None	1.12708
CEP85	1.80612	4.16428e-12	4.11803e-11	None	None	11.3805
SH3BGRL3	1.62818	8.92979e-05	0.000277748	None	None	4.04916
UBXN11	1.18078	0.00145949	0.00364492	None	None	2.8358
CD52	7.79471	5.79115e-13	6.45299e-12	None	None	12.2372
CRYBG2	-0.419622	0.162369	0.24518	None	None	0.789497
ZNF683	-2.59822	0.555523	NA	None	None	0.255298
LIN28A	NA	NA	NA	None	None	NA
DHDDS	0.497021	0.00139299	0.00348923	None	None	2.85605
AL513365.2	-1.78621	1.90539e-24	7.87351e-23	None	None	23.72
HMGN2	0.717116	4.07823e-05	0.000133927	None	None	4.38953
RPS6KA1	2.34514	8.67139e-08	4.30234e-07	None	None	7.06191
AL512408.1	-3.5427	0.416958	NA	None	None	0.379907
ARID1A	-0.687737	1.67443e-13	1.99741e-12	None	None	12.7761
PIGV	-0.34827	0.327542	0.444497	None	None	0.484733
ZDHHC18	0.0822863	0.695923	0.805472	None	None	0.157439
SFN	8.87507	1.71279e-12	1.79428e-11	None	None	11.7663
GPN2	0.174953	0.335917	0.453477	None	None	0.473769
GPATCH3	0.959957	0.00155045	0.00384502	None	None	2.80954
NUDC	0.374995	0.000708819	0.00187466	None	None	3.14946
KDF1	-0.767105	0.00383757	0.00877929	None	None	2.41594
TRNP1	2.40586	0.167169	0.251278	None	None	0.776845
TENT5B	9.71828	1.0478e-13	1.2952e-12	None	None	12.9797
SLC9A1	-0.182512	0.166704	0.250719	None	None	0.778054
WDTC1	-1.8852	1.33859e-12	1.41852e-11	None	None	11.8734
TMEM222	0.811816	1.419e-06	5.84085e-06	None	None	5.84802
SYTL1	1.64724	0.0229947	0.0442142	None	None	1.63837
MAP3K6	-3.2537	0.0315117	0.058592	None	None	1.50153
FCN3	NA	NA	NA	None	None	NA
WASF2	-1.06551	1.69202e-20	4.74237e-19	None	None	19.7716
FO393419.2	7.46008	9.78421e-09	5.67428e-08	None	None	8.00947
AHDC1	-0.845435	0.0280427	0.0527757	None	None	1.55218
FGR	-7.21143	0.0902238	0.14788	positive regulation of cytokine production	None	1.04468
IFI6	3.65171	4.56826e-11	3.88061e-10	None	None	10.3402
AL445490.1	6.90212	1.01786e-07	4.99717e-07	None	None	6.99231
FAM76A	0.991345	1.89449e-05	6.55925e-05	None	None	4.72251
STX12	0.139	0.264297	0.371237	None	None	0.577908
AL020997.3	NA	NA	NA	None	None	NA
AL020997.4	1.51217	0.508232	0.632	None	None	0.293938
PPP1R8	-0.184552	0.316634	0.432143	None	None	0.499442
THEMIS2	-2.57553	0.146968	0.225013	immune response-regulating cell surface receptor signaling pathway	None	0.832778
RPA2	0.739247	2.66137e-05	9.00429e-05	None	None	4.57489
SMPDL3B	5.91366	8.71296e-05	0.000271339	None	None	4.05983
AL512288.1	5.27277	0.0116583	0.0239864	None	None	1.93337
XKR8	2.21112	0.0943734	0.153791	None	None	1.02515
EYA3	0.203238	0.131082	0.203919	None	None	0.882457
PTAFR	-0.218771	0.646726	0.761406	None	None	0.18928
DNAJC8	0.243608	0.0213037	0.0412767	None	None	1.67154
ATP5IF1	2.03821	3.44084e-23	1.25441e-21	None	None	22.4633
AL353622.1	2.39641	0.00807277	0.0172349	None	None	2.09298
SESN2	1.2709	6.10332e-09	3.66418e-08	None	None	8.21443
MED18	-0.255749	0.31366	0.428665	None	None	0.503541
PHACTR4	-0.23774	0.337941	0.455782	None	None	0.471159
RCC1	1.69858	8.63545e-08	4.28557e-07	None	None	7.06371
SNHG3	3.22287	0.103893	0.166966	None	None	0.983413
TRNAU1AP	-0.540308	0.00173239	0.00425932	None	None	2.76136
SNHG12	1.74212	6.19179e-11	5.16171e-10	None	None	10.2082
TAF12	-0.230306	0.0885834	0.145478	None	None	1.05265
RAB42	0	1	NA	None	None	0
LINC01715	5.1654	0.000194529	0.000569992	None	None	3.71102
AL360012.1	-0.00421984	0.998657	1	None	None	0.00058365
GMEB1	-0.95483	4.46719e-07	1.97101e-06	None	None	6.34997
YTHDF2	0.135697	0.337462	0.455228	None	None	0.471775
OPRD1	-0.939244	0.563668	0.685393	None	None	0.248977
EPB41	-0.237161	0.249598	0.354075	None	None	0.602759
TMEM200B	0	1	NA	None	None	0
AL357500.1	-8.26206	0.000214435	0.000623596	None	None	3.6687
SRSF4	-0.51601	4.03521e-09	2.48865e-08	None	None	8.39413
MECR	-0.747863	0.000225076	0.000652091	None	None	3.64767
PTPRU	-1.03693	0.0122969	0.0251767	None	None	1.91021
LINC01756	0.303967	0.93831	0.99539	None	None	0.0276537
MATN1-AS1	-3.15009	0.0165019	0.0327791	None	None	1.78246
LAPTM5	-9.0121	0.000179944	0.00053089	positive regulation of cytokine production	None	3.74486
SDC3	1.63552	0.00463034	0.0104428	None	None	2.33439
PUM1	-0.193433	0.168676	0.253192	None	None	0.772948
NKAIN1	3.33266	NA	NA	None	None	NA
SNRNP40	0.497784	0.00136335	0.00342223	None	None	2.86539
ZCCHC17	-0.0400902	0.843139	0.927379	None	None	0.074101
AL451070.1	9.35355	5.08786e-14	6.53819e-13	None	None	13.2935
FABP3	6.28169	0.0017989	0.00440723	None	None	2.74499
SERINC2	-0.43418	0.309691	0.423988	None	None	0.509071
LINC01226	-0.0456558	0.977178	1	None	None	0.0100265
AC114488.1	5.72303	0.0775815	0.129823	None	None	1.11024
TINAGL1	1.06796	0.00311474	0.00727243	None	None	2.50658
HCRTR1	5.37696	0.0326308	0.060466	None	None	1.48637
PEF1	-1.36969	2.9212e-16	5.02876e-15	mesenchyme development	None	15.5344
AC114488.2	-4.02223	0.260142	NA	None	None	0.58479
AC114488.3	NA	NA	NA	None	None	NA
COL16A1	-2.18247	0.214488	0.311233	cell-substrate adhesion	None	0.668598
ADGRB2	3.75469	0.0880348	0.144716	None	None	1.05535
SPOCD1	2.05349	0.188948	0.279259	None	None	0.723658
AL354919.1	-0.674644	0.878344	NA	None	None	0.0563352
AL136115.2	0.356718	0.32151	0.437639	None	None	0.492806
PTP4A2	0.715359	0.000326003	0.000916782	None	None	3.48678
KHDRBS1	-0.271884	0.00227242	0.00544149	None	None	2.64351
AL445248.1	2.79483	0.00656256	0.0143051	None	None	2.18293
TMEM39B	-0.556655	0.000563282	0.00151767	None	None	3.24927
KPNA6	0.429978	0.00208338	0.00503374	None	None	2.68123
TXLNA	0.517109	0.00101075	0.00260541	None	None	2.99535
CCDC28B	1.27471	0.353009	0.472243	None	None	0.452214
AL049795.1	0	1	NA	None	None	0
IQCC	2.10859	0.354357	0.473669	None	None	0.450559
DCDC2B	6.6049	2.27544e-06	9.11083e-06	None	None	5.64293
TMEM234	-0.888046	8.70528e-05	0.000271142	None	None	4.06022
EIF3I	1.28183	7.02939e-09	4.17901e-08	None	cytoplasmic translation	8.15308
FAM167B	0	1	NA	None	None	0
LCK	-7.18724	0.0413309	0.0746226	immune response-regulating cell surface receptor signaling pathway	None	1.38373
HDAC1	0.278081	0.019887	0.0388172	None	None	1.70143
MARCKSL1	-0.97663	0.440656	0.564753	None	None	0.355901
TSSK3	-4.67711	0.000288856	0.000820572	None	None	3.53932
FAM229A	0.846314	0.310558	0.424975	None	None	0.507857
BSDC1	-0.642296	3.83661e-08	2.01325e-07	None	None	7.41605
ZBTB8B	1.88216	0.338867	0.456786	None	None	0.46997
ZBTB8A	1.50914	NA	NA	None	None	NA
ZBTB8OS	-0.751436	3.06269e-16	5.25883e-15	None	None	15.5139
RBBP4	-0.989548	8.4932e-20	2.18844e-18	None	None	19.0709
SYNC	0.335546	0.312558	0.427449	None	None	0.50507
KIAA1522	-2.56045	4.22621e-09	2.59646e-08	None	None	8.37405
YARS	1.1603	1.34321e-07	6.46204e-07	None	None	6.87186
S100PBP	-2.22098	1.89406e-18	4.19781e-17	None	None	17.7226
FNDC5	-0.0143688	0.995658	1	None	None	0.00188982
HPCA	0	1	NA	None	None	0
TMEM54	-1.1076	0.00427076	0.00969156	None	None	2.3695
AL031602.2	1.34212	0.387551	0.509311	None	None	0.411671
RNF19B	-0.4168	0.0632962	0.108523	None	None	1.19862
AL020995.1	10.9736	3.37428e-19	8.11278e-18	None	None	18.4718
AK2	0.807718	4.59458e-05	0.000149808	None	None	4.33775
AZIN2	1.26063	0.0589708	0.10204	None	None	1.22936
TRIM62	-2.72795	1.22714e-13	1.49939e-12	mesenchyme development	None	12.9111
AL662907.3	-3.38848	0.438893	NA	None	None	0.357642
ZNF362	-4.3732	5.42052e-52	1.45443e-49	None	None	51.266
AL513327.3	-8.96889	0.0348264	0.0640511	None	None	1.45809
A3GALT2	-0.674646	0.859142	NA	None	None	0.065935
AL513327.1	6.97227	4.75438e-18	1.01676e-16	None	None	17.3229
PHC2	0.124428	0.467395	0.592569	None	None	0.330316
AL513327.2	2.54658	6.63503e-13	7.32437e-12	None	None	12.1782
ZSCAN20	-0.899926	0.0247003	0.0471737	None	None	1.6073
CSMD2	-7.58017	0.00361944	0.00833002	None	None	2.44136
SMIM12	-0.288764	0.0883588	0.145189	None	None	1.05375
GJB5	0.612199	0.88785	NA	None	None	0.0516606
GJB4	-0.674644	0.878344	NA	None	None	0.0563352
GJB3	0.305996	0.944085	0.99853	None	None	0.0249888
GJA4	NA	NA	NA	None	None	NA
DLGAP3	0	1	NA	None	None	0
TMEM35B	6.70296	0.000252114	0.00072386	None	None	3.5984
ZMYM6	-0.442476	0.78645	0.883916	None	None	0.104329
ZMYM1	0.00772811	0.960778	1	None	None	0.0173772
AL590434.1	0.598258	0.879878	NA	None	None	0.0555775
SFPQ	-0.182463	0.172472	0.258169	None	None	0.763281
ZMYM4	-1.1043	1.4267e-10	1.11197e-09	None	None	9.84567
ZMYM4-AS1	9.80194	2.43605e-15	3.74222e-14	None	None	14.6133
KIAA0319L	-1.07997	1.28483e-06	5.32455e-06	None	None	5.89115
NCDN	1.80754	0.0191991	0.0375729	None	None	1.71672
AC004865.2	-4.13097	0.0129658	0.0263629	None	None	1.8872
TFAP2E	3.21302	0.001123	0.00286575	None	None	2.94962
PSMB2	-0.0915387	0.564379	0.686133	None	None	0.248429
C1orf216	3.83473	0.125574	0.196704	None	None	0.9011
CLSPN	3.64792	4.10779e-14	5.34359e-13	None	None	13.3864
AGO4	-1.20863	6.60855e-06	2.4537e-05	None	None	5.17989
AGO1	2.27117	0.0125368	0.0256002	None	None	1.90181
AGO3	-0.0531501	0.816515	0.907019	None	None	0.0880358
AL138787.2	9.90468	7.56895e-15	1.08334e-13	None	None	14.121
ADPRHL2	0.367845	0.1788	0.266157	None	None	0.747632
COL8A2	1.66765	0.585569	0.705798	None	None	0.232422
TRAPPC3	-0.299682	0.111096	0.176843	None	None	0.954301
MAP7D1	-0.164464	0.483392	0.607607	None	None	0.3157
THRAP3	-0.109549	0.492872	0.617352	None	None	0.307266
SH3D21	0.301177	0.216054	0.31309	None	None	0.665437
EVA1B	1.60273	3.39986e-05	0.000113145	None	None	4.46854
AL591845.1	1.25082	0.310597	0.424998	None	None	0.507803
STK40	0.990246	5.2459e-05	0.000169397	None	None	4.28018
LSM10	1.1976	0.000504323	0.00137093	None	None	3.29729
OSCP1	0.465002	0.0539521	0.0943049	None	None	1.26799
MRPS15	1.95345	7.14597e-12	6.84463e-11	None	None	11.1459
CSF3R	-1.59929	1.85281e-06	7.52339e-06	None	None	5.73217
GRIK3	1.65529	0.699811	NA	None	None	0.155019
AL353604.1	-2.59822	0.555523	NA	None	None	0.255298
LINC01137	-1.78104	0.00019722	0.00057754	None	None	3.70505
ZC3H12A	1.02717	0.258598	0.364735	None	None	0.587374
MEAF6	-0.85589	0.000861807	0.00224883	None	None	3.06459
SNIP1	0.122329	0.542418	0.665912	None	None	0.265666
DNALI1	3.03469	0.188644	0.278891	None	None	0.724357
GNL2	1.07184	1.18562e-05	4.23041e-05	None	ribosome biogenesis	4.92605
RSPO1	-0.674644	0.878344	NA	None	None	0.0563352
C1orf109	0.279531	0.158105	0.239568	None	None	0.801054
CDCA8	0.643905	0.294881	0.406933	None	None	0.530354
EPHA10	1.71781	0.688921	NA	None	None	0.16183
MANEAL	3.55335	0.0621685	0.106793	None	None	1.20643
YRDC	1.64953	2.52937e-09	1.61488e-08	None	None	8.59699
C1orf122	3.6562	6.2488e-07	2.702e-06	None	None	6.2042
MTF1	-0.512224	0.00297624	0.00697413	None	None	2.52633
INPP5B	-0.527801	0.045068	0.0805103	None	None	1.34613
SF3A3	-0.171919	0.277485	0.386913	None	None	0.556761
FHL3	1.89323	0.0357204	0.0655157	None	None	1.44708
UTP11	0.214628	0.37335	0.493939	None	None	0.427883
MIR3659HG	-0.183934	0.92937	0.988669	None	None	0.0318113
AL354702.2	-4.4296	0.300699	NA	None	None	0.521868
RRAGC	0.194944	0.213602	0.310192	None	None	0.670394
AL139260.1	0.528673	0.000161574	0.000480354	None	None	3.79163
MYCBP	1.4336	0.014078	0.0284043	None	None	1.85146
GJA9	9.15315	1.16771e-13	1.43199e-12	None	None	12.9327
RHBDL2	4.93106	4.7814e-10	3.41936e-09	None	None	9.32045
AKIRIN1	0.206942	0.352736	0.471971	None	None	0.452551
NDUFS5	2.28769	5.28088e-07	2.30776e-06	None	oxidative phosphorylation	6.27729
MACF1	-0.484005	0.00191583	0.00466588	None	None	2.71764
AL442071.2	8.92668	1.16858e-05	4.17182e-05	None	None	4.93234
BMP8A	7.56575	1.2705e-09	8.51115e-09	None	None	8.89603
PABPC4	1.66924	3.20723e-19	7.74817e-18	None	None	18.4939
HEYL	-0.61905	0.813844	0.904901	None	None	0.0894587
PPIE	0.802162	0.0895801	0.14692	None	None	1.04779
BMP8B	0.119928	0.968686	1	None	None	0.0138171
OXCT2	NA	NA	NA	None	None	NA
AL033527.4	-5.43984	0.0999446	NA	None	None	1.00024
LINC02811	-3.5427	0.416958	NA	None	None	0.379907
TRIT1	-0.412818	0.0530983	0.0930387	None	None	1.27492
MYCL	1.39135	0.335243	0.452871	None	None	0.474641
MFSD2A	-2.20798	6.63554e-06	2.46236e-05	None	None	5.17812
CAP1	0.456751	0.000881444	0.00229621	None	None	3.05481
PPT1	1.54757	3.43067e-17	6.56263e-16	None	None	16.4646
RLF	0.0754158	0.495472	0.619732	None	None	0.304981
TMCO2	0	1	NA	None	None	0
AL050341.2	-0.0537248	0.965932	1	None	None	0.0150535
ZMPSTE24	0.636798	0.0010281	0.00264471	None	None	2.98796
COL9A2	20.9438	NA	NA	None	None	NA
SMAP2	-0.494878	0.0911167	0.149161	None	None	1.0404
ZFP69B	1.46961	0.732482	NA	None	None	0.135203
ZFP69	2.04578	0.188854	0.27914	None	None	0.723875
AL603839.3	-1.05216	0.00869271	0.0184326	None	None	2.06084
EXO5	-1.23475	0.374372	0.49503	None	None	0.426697
ZNF684	-1.26928	0.000246774	0.000709643	None	None	3.6077
RIMS3	0.369663	0.924882	NA	None	None	0.0339139
AL031289.2	NA	NA	NA	None	None	NA
AL031289.1	-0.0792319	0.980248	1	None	None	0.00866403
NFYC-AS1	7.26247	2.38376e-09	1.5287e-08	None	None	8.62274
NFYC	-0.82021	4.46189e-05	0.000145677	None	None	4.35048
KCNQ4	-2.03826	0.124711	0.195458	None	None	0.904097
CITED4	-3.67079	1.88563e-13	2.23083e-12	None	None	12.7245
AC119677.1	-3.54026	0.350253	NA	None	None	0.455618
CTPS1	0.397107	0.371316	0.491764	None	None	0.430257
SLFNL1-AS1	-0.296511	0.402205	0.524425	None	None	0.395553
SLFNL1	8.13743	4.2431e-05	0.000138978	None	None	4.37232
SCMH1	-4.70119	1.36919e-49	3.27786e-47	None	None	48.8635
AC093151.8	0.755325	NA	NA	None	None	NA
FOXO6	-0.333897	0.373145	0.493699	None	None	0.428123
AC093151.2	1.17589	0.785031	0.882618	None	None	0.105113
HIVEP3	-3.07018	4.05707e-09	2.49983e-08	None	None	8.39179
GUCA2B	NA	NA	NA	None	None	NA
GUCA2A	-3.97753	0.358782	NA	None	None	0.44517
FOXJ3	-1.79148	1.05199e-19	2.68658e-18	None	None	18.978
RIMKLA	-1.58166	0.139488	0.214985	None	None	0.855463
ZMYND12	0	1	1	None	None	0
PPCS	-0.356632	0.00886123	0.0187575	None	None	2.05251
CCDC30	-0.238401	0.345948	0.464712	None	None	0.46099
PPIH	-0.890912	1.2964e-11	1.19728e-10	None	None	10.8873
AC098484.4	4.11717	NA	NA	None	None	NA
YBX1	0.84465	0.00119553	0.0030316	None	None	2.92244
CLDN19	-0.182181	0.924264	0.98506	None	None	0.0342038
P3H1	0.31664	0.30801	0.422033	None	None	0.511435
C1orf50	0.400691	NA	NA	None	None	NA
TMEM269	6.0288	1.04418e-08	6.02957e-08	None	None	7.98123
SVBP	0.40408	0.132958	0.206501	None	None	0.876287
ERMAP	-2.15153	1.6536e-29	1.05307e-27	immune response-regulating cell surface receptor signaling pathway	None	28.7816
AL512353.1	0.498244	0.681379	0.792742	None	None	0.166612
ZNF691	-1.3862	8.89797e-08	4.40933e-07	None	None	7.05071
SLC2A1	-0.120729	0.765225	0.86567	None	None	0.116211
SLC2A1-AS1	-2.27991	1.31325e-09	8.78296e-09	None	None	8.88165
AC099795.1	5.0308	0.00116824	0.00296951	None	None	2.93247
FAM183A	-0.958482	0.0398223	0.0721903	None	None	1.39987
EBNA1BP2	1.33763	4.08927e-16	6.92115e-15	None	ribosome biogenesis	15.3884
CFAP57	2.24666	0.0765023	0.128252	None	None	1.11633
TMEM125	7.18866	6.28137e-06	2.34267e-05	None	None	5.20195
C1orf210	5.7275	0.00277173	0.00653295	None	None	2.55725
TIE1	-5.61933	1.58938e-05	5.56835e-05	extracellular matrix organization	None	4.79877
AL139289.2	0.985328	0.305544	0.419396	None	None	0.514926
CDC20	8.20558	6.13078e-09	3.67956e-08	None	None	8.21248
ELOVL1	0.932881	9.11739e-06	3.31069e-05	None	None	5.04013
MED8	0.925292	1.43435e-05	5.04717e-05	None	None	4.84335
SZT2	-0.652075	0.000390174	0.00108197	None	None	3.40874
HYI	0.0660707	0.955722	1	None	None	0.0196686
HYI-AS1	NA	NA	NA	None	None	NA
PTPRF	-1.189	6.8068e-11	5.62547e-10	None	None	10.1671
KDM4A	-0.977772	0.529202	0.653433	None	None	0.276379
KDM4A-AS1	4.53335	6.86848e-06	2.54083e-05	None	None	5.16314
ST3GAL3	-2.2493	0.11569	0.183074	None	None	0.936703
AL451062.1	6.6734	4.18156e-07	1.85311e-06	None	None	6.37866
ARTN	-9.49509	0.000167532	0.000496601	None	None	3.7759
AL357079.1	-3.97954	0.00888982	0.0188077	None	None	2.05111
IPO13	-2.06339	0.00153615	0.00381459	None	None	2.81357
DPH2	8.7515	1.78684e-08	9.89226e-08	None	None	7.74791
ATP6V0B	1.79319	9.35137e-07	3.94936e-06	None	None	6.02912
B4GALT2	-1.14149	0.0101951	0.0212563	None	None	1.99161
CCDC24	-1.2939	0.000687308	0.00182352	None	None	3.16285
SLC6A9	0.788775	0.342991	0.461479	None	None	0.464718
AL139220.2	-2.10488	0.102687	0.165344	None	None	0.988485
DMAP1	-1.84497	1.01342e-07	4.97782e-07	None	None	6.99421
ERI3	-1.22313	1.26636e-07	6.11277e-07	None	None	6.89744
ERI3-IT1	NA	NA	NA	None	None	NA
RNF220	-1.3373	2.42643e-06	9.68385e-06	None	None	5.61503
TMEM53	1.36528	1.78026e-05	6.1929e-05	None	None	4.74952
ARMH1	1.40482	0.00130337	0.00328272	None	None	2.88493
KIF2C	2.35026	0.00222616	0.00533897	None	None	2.65244
AL592166.1	1.12914	0.321253	0.437378	None	None	0.493153
RPS8	3.00996	1.50578e-13	1.80909e-12	None	ribosome biogenesis	12.8222
BEST4	-10.3685	2.6794e-06	1.06163e-05	None	None	5.57196
PLK3	0.996492	0.00112637	0.00287359	None	None	2.94832
TCTEX1D4	-5.65893	0.0229361	0.04411	None	None	1.63948
BTBD19	-0.25744	0.444504	0.568813	None	None	0.352124
PTCH2	6.96974	6.08485e-06	2.27605e-05	None	None	5.21575
EIF2B3	0.925546	0.00135974	0.0034153	None	None	2.86655
HECTD3	0.13372	0.555588	0.677547	None	None	0.255247
UROD	-0.111336	0.884423	0.954784	None	None	0.0533401
ZSWIM5	-1.10838	0.000311254	0.00087862	None	None	3.50688
LINC01144	NA	NA	NA	None	None	NA
HPDL	8.79777	5.39904e-07	2.3548e-06	None	None	6.26768
MUTYH	1.08861	3.22497e-05	0.000107663	None	None	4.49147
TOE1	0.979047	0.000938727	0.0024344	None	None	3.02746
TESK2	-1.20053	0.0020874	0.00504162	cell-substrate adhesion	None	2.68039
CCDC163	0.957788	0.695135	0.804932	None	None	0.157931
MMACHC	4.29746	0.00612758	0.0134458	None	None	2.21271
PRDX1	1.8163	1.32429e-06	5.47566e-06	None	None	5.87802
AKR1A1	2.17905	9.54699e-14	1.18741e-12	None	None	13.0201
NASP	0.0245297	0.840954	0.925684	None	None	0.075228
CCDC17	6.6546	0.00194386	0.00472568	None	None	2.71134
GPBP1L1	0.224564	0.166613	0.250611	None	None	0.778291
TMEM69	0.508263	0.00551314	0.0122147	None	None	2.2586
IPP	-1.45655	6.65119e-13	7.33416e-12	None	None	12.1771
AL604028.1	NA	NA	NA	None	None	NA
MAST2	0.446318	0.0169445	0.033562	None	None	1.77097
PIK3R3	-0.512006	0.734735	0.840581	None	None	0.133869
AL358075.2	NA	NA	NA	None	None	NA
TSPAN1	-0.674646	0.851415	0.933625	None	None	0.0698586
POMGNT1	-0.224006	0.352014	0.471288	None	None	0.45344
LURAP1	-0.666636	0.105695	0.169442	None	None	0.975947
RAD54L	1.77507	0.00341948	0.00791324	None	None	2.46604
LRRC41	-1.4649	1.91515e-17	3.79335e-16	None	None	16.7178
UQCRH	1.79816	1.19122e-16	2.14419e-15	None	oxidative phosphorylation	15.924
NSUN4	0.366856	0.0245746	0.0469692	None	None	1.60951
FAAH	0.287229	0.259779	0.36599	None	None	0.585395
MKNK1-AS1	8.86481	2.74256e-11	2.408e-10	None	None	10.5618
MKNK1	0.259432	0.308613	0.422744	None	None	0.510585
MOB3C	-6.63664	1.61248e-06	6.59542e-06	None	None	5.79251
ATPAF1	-1.16927	9.79583e-07	4.12754e-06	None	None	6.00896
TEX38	1.79467	0.555958	0.677943	None	None	0.254958
EFCAB14-AS1	9.20084	4.62556e-07	2.03731e-06	None	None	6.33484
EFCAB14	-0.432719	0.00497777	0.0111501	None	None	2.30296
CYP4B1	-10.7453	4.9482e-15	7.28971e-14	None	None	14.3056
CYP4X1	0	1	NA	None	None	0
CYP4Z1	0	1	1	None	None	0
CYP4A22-AS1	-2.52735	0.557611	NA	None	None	0.253668
PDZK1IP1	NA	NA	NA	None	None	NA
TAL1	-6.50802	0.00516253	0.0115242	None	None	2.28714
STIL	0.809931	0.0139447	0.0281637	None	None	1.85559
CMPK1	-0.0167775	0.925039	0.985677	None	None	0.0338398
LINC01389	8.53405	1.30482e-10	1.02331e-09	None	None	9.88445
TRABD2B	-5.74394	0.0124028	0.02536	None	None	1.90648
LINC02794	NA	NA	NA	None	None	NA
AL109659.1	NA	NA	NA	None	None	NA
SLC5A9	NA	NA	NA	None	None	NA
AL109659.2	NA	NA	NA	None	None	NA
SPATA6	-1.67572	0.172662	0.258415	None	None	0.762804
AGBL4	-2.41773	2.87514e-06	1.1345e-05	None	None	5.54134
BEND5	NA	NA	NA	None	None	NA
AC099788.1	2.15986	0.278818	0.388461	None	None	0.55468
ELAVL4	-2.59822	0.555523	NA	None	None	0.255298
FAF1	-1.05592	1.02622e-05	3.69637e-05	None	None	4.98876
CDKN2C	-0.584903	0.801565	0.895088	None	None	0.096061
LINC01562	0.486747	0.708458	0.816365	None	None	0.149686
RNF11	-0.509487	0.00215145	0.00518263	None	None	2.66727
AL162430.2	8.69818	5.74108e-12	5.57056e-11	None	None	11.241
TTC39A	6.92093	5.54333e-31	3.94183e-29	None	None	30.2562
TTC39A-AS1	8.44072	1.30009e-09	8.69784e-09	None	None	8.88603
EPS15	-0.470358	0.00657061	0.014318	None	None	2.18239
AC104170.1	-2.76202	1.02386e-22	3.57092e-21	None	None	21.9898
OSBPL9	0.182024	0.32671	0.443609	None	None	0.485837
NRDC	0.0718959	0.642184	0.756949	None	None	0.19234
RAB3B	-4.50428	1.28611e-57	4.31361e-55	None	None	56.8907
TXNDC12	0.105679	0.528308	0.65253	None	None	0.277112
KTI12	7.53019	1.81715e-09	1.18999e-08	None	None	8.74061
AL445685.1	7.38431	2.67824e-09	1.70183e-08	None	None	8.57215
BTF3L4	0.351878	0.0328269	0.0607791	None	None	1.48377
ZFYVE9	-2.19138	8.52124e-24	3.31686e-22	None	None	23.0695
CC2D1B	-0.242948	0.209865	0.305458	None	None	0.678061
AL513218.1	NA	NA	NA	None	None	NA
AL513218.2	1.59974	0.155286	0.235829	None	None	0.808869
ORC1	2.72689	0.000246695	0.000709643	None	None	3.60784
PRPF38A	0.480258	0.000484843	0.0013219	None	None	3.3144
TUT4	-1.02813	2.03929e-06	8.23738e-06	None	None	5.69052
GPX7	2.20083	0.469276	0.594243	None	None	0.328571
SHISAL2A	0.00035877	0.999856	NA	None	None	6.25462e-05
COA7	2.68099	5.62113e-17	1.04643e-15	None	None	16.2502
ZYG11B	-0.277217	0.123755	0.194127	None	None	0.907436
ZYG11A	6.5688	1.88854e-22	6.43062e-21	None	None	21.7239
ECHDC2	-0.665886	0.0837428	0.138441	None	None	1.07705
SCP2	-0.79745	0.008042	0.0171765	None	None	2.09464
PODN	0	1	1	None	None	0
SLC1A7	NA	NA	NA	None	None	NA
CPT2	-1.79456	1.30928e-14	1.80836e-13	None	None	13.883
AL606760.2	0.0131177	0.994499	1	None	None	0.00239545
CZIB	-0.208675	NA	NA	None	None	NA
AL606760.3	0.764044	0.778864	0.877498	None	None	0.108538
MAGOH	0.636487	2.18221e-05	7.47741e-05	None	None	4.6611
AL606760.1	9.54408	7.95052e-14	9.98729e-13	None	None	13.0996
LRP8	1.11288	0.00359586	0.00828143	None	None	2.4442
LINC01771	-2.42663	0.0132273	0.026836	None	None	1.87853
AC119428.2	0.734588	0.795846	0.891367	None	None	0.099171
LINC02812	3.04781	0.474818	NA	None	None	0.323472
GLIS1	0.625992	0.82504	NA	None	None	0.083525
NDC1	2.23607	7.34451e-16	1.20066e-14	None	None	15.134
YIPF1	-0.6806	8.85348e-06	3.22067e-05	None	None	5.05289
DIO1	8.61891	5.35047e-12	5.21166e-11	None	None	11.2716
HSPB11	-1.53658	5.21899e-15	7.6662e-14	None	None	14.2824
LRRC42	-1.37576	1.74188e-19	4.34368e-18	None	None	18.759
LDLRAD1	0	1	NA	None	None	0
TMEM59	0.525198	0.00212684	0.00513074	None	None	2.67226
TCEANC2	-0.629923	0.0344404	0.0634571	None	None	1.46293
CYB5RL	3.53169	0.00833467	0.0177339	None	None	2.07911
MRPL37	0.346413	0.111418	0.17729	None	None	0.953043
SSBP3	0.514901	0.0760575	0.127612	None	None	1.11886
SSBP3-AS1	-2.59822	0.555523	NA	None	None	0.255298
AC099796.2	1.3635	0.501691	0.6258	None	None	0.299564
ACOT11	2.35042	7.41814e-08	3.71257e-07	None	None	7.12971
MROH7	-0.615178	0.694209	0.804137	None	None	0.15851
TTC4	-0.46646	0.745273	0.849257	None	None	0.127684
PARS2	4.31683	1.86214e-06	7.55364e-06	None	None	5.72999
TTC22	0	1	NA	None	None	0
LEXM	NA	NA	NA	None	None	NA
DHCR24	1.33888	0.000725324	0.00191479	None	None	3.13947
AC096536.3	8.0207	1.05186e-09	7.14878e-09	None	None	8.97804
DHCR24-DT	NA	NA	NA	None	None	NA
USP24	-1.02807	0.000107082	0.000328645	None	None	3.97028
MIR4422HG	-3.8097	0.321811	0.437907	None	None	0.492399
AL603840.1	-2.50657	0.0142864	0.0287816	None	None	1.84508
LINC01753	-8.4219	2.01646e-08	1.10661e-07	None	None	7.69541
AC119674.1	-2.91757	3.74521e-05	0.000123778	None	None	4.42652
PLPP3	-3.47271	9.82795e-38	1.17725e-35	None	None	37.0075
PRKAA2	1.58667	0.00747607	0.0160856	None	carbohydrate derivative catabolic process	2.12633
FYB2	-1.19653	0.431817	0.555797	immune response-regulating cell surface receptor signaling pathway	None	0.3647
DAB1	0.957475	0.0406134	0.0734919	None	None	1.39133
OMA1	-0.965902	0.522011	0.646299	None	None	0.282321
AL035411.3	0	1	NA	None	None	0
TACSTD2	5.21608	1.13658e-07	5.53541e-07	None	None	6.9444
MYSM1	0.0723413	0.648919	0.763388	None	None	0.18781
AL136985.3	-6.02669	0.0497943	NA	None	None	1.30282
JUN	3.4214	7.01996e-10	4.88484e-09	None	None	9.15367
LINC01135	0.454385	0.397474	0.519556	None	None	0.400692
LINC01358	-3.44653	0.130088	0.202601	None	None	0.885762
AC093425.1	-2.59822	0.555523	NA	None	None	0.255298
FGGY	-1.20819	0.0167114	0.0331493	None	None	1.77699
HOOK1	0.836379	0.0335021	0.0618869	None	None	1.47493
CYP2J2	2.41974	0.00070398	0.00186284	None	None	3.15244
C1orf87	0	1	1	None	None	0
LINC01748	-3.69471	7.44826e-18	1.54365e-16	None	None	17.1279
AC099792.1	-12.4001	1.41792e-13	1.7078e-12	None	None	12.8483
NFIA	-3.36657	4.54497e-12	4.47689e-11	connective tissue development	None	11.3425
NFIA-AS2	-5.7112	0.0266662	0.0504542	None	None	1.57404
TM2D1	-0.541953	0.00447432	0.0101204	None	None	2.34927
PATJ	0.856891	0.0728955	0.123032	None	None	1.1373
L1TD1	-0.0597376	0.917652	0.980347	None	None	0.0373219
KANK4	-1.04277	0.0729796	0.123146	None	None	1.1368
USP1	-0.613185	0.00165292	0.0040774	None	None	2.78175
DOCK7	-0.647887	1.51777e-06	6.22576e-06	None	None	5.81879
AC103923.1	-0.453116	0.569616	0.690789	None	None	0.244418
ATG4C	-0.300768	0.297594	0.410106	None	None	0.526376
LINC01739	NA	NA	NA	None	None	NA
LINC00466	0.612821	0.885678	0.955678	None	None	0.0527239
ALG6	-0.981583	0.000181706	0.000535458	None	None	3.74063
ITGB3BP	-1.34423	0.000358663	0.00100024	None	None	3.44531
BX004807.1	6.68202	3.95009e-07	1.7575e-06	None	None	6.40339
EFCAB7	0.613808	0.25133	0.356155	None	None	0.599756
DLEU2L	0	1	1	None	None	0
PGM1	-1.24253	3.16618e-08	1.67984e-07	None	None	7.49946
ROR1	-1.27335	0.025129	0.0478843	None	None	1.59982
ROR1-AS1	-1.48104	0.475523	0.60034	None	None	0.322829
AL445205.1	NA	NA	NA	None	None	NA
UBE2U	-8.5852	1.35773e-09	9.05632e-09	None	None	8.86719
CACHD1	-6.38922	1.62096e-09	1.07022e-08	None	None	8.79023
RAVER2	-0.947977	0.125381	0.196416	None	None	0.901769
JAK1	-1.19335	9.22133e-06	3.34228e-05	None	None	5.03521
LINC01359	-3.5539	0.415392	NA	None	None	0.381542
AL357078.2	NA	NA	NA	None	None	NA
AK4	3.33286	5.97551e-59	2.18639e-56	None	oxidative phosphorylation	58.2236
DNAJC6	-0.765727	0.10584	0.169648	None	None	0.97535
AL139294.1	11.5019	4.88412e-18	1.0434e-16	None	None	17.3112
LEPROT	0.463865	0.80935	0.901148	None	None	0.0918638
LEPR	0.00644901	0.983552	1	None	None	0.00720276
AC119800.1	0.305999	0.944085	NA	None	None	0.024989
PDE4B	2.86455	0.000993965	0.00256503	None	None	3.00263
SGIP1	-0.804586	0.541068	0.664761	None	None	0.266748
AL139147.1	-2.59822	0.555523	NA	None	None	0.255298
TCTEX1D1	-6.73817	0.0804338	0.13385	None	None	1.09456
WDR78	-1.28982	9.42175e-05	0.000291787	None	None	4.02587
MIER1	-0.0605742	0.701358	0.81004	None	None	0.15406
SLC35D1	-0.556985	0.324119	0.440595	None	None	0.489296
C1orf141	-3.03253	0.484039	NA	None	None	0.31512
IL23R	-4.08588	0.345145	NA	positive regulation of cytokine production	None	0.461998
IL12RB2	3.34109	4.81546e-08	2.48797e-07	None	None	7.31736
SERBP1	1.43363	1.11573e-16	2.01734e-15	None	ribosome biogenesis	15.9524
GADD45A	5.85668	3.251e-19	7.84449e-18	None	None	18.488
GNG12	-0.693155	0.0148081	0.0297255	None	None	1.8295
GNG12-AS1	0.0402137	0.899864	0.966837	None	None	0.0458231
DIRAS3	0	1	NA	None	None	0
WLS	0.877279	0.10652	0.170562	None	None	0.972567
DEPDC1	7.57865	1.14383e-08	6.54865e-08	None	None	7.94164
AL033530.1	-0.750847	0.321038	0.437247	None	None	0.493443
AL691520.1	-4.48448	0.237133	NA	None	None	0.625008
LINC01707	-6.4396	7.98671e-06	2.92439e-05	None	None	5.09763
LINC02791	NA	NA	NA	None	None	NA
LRRC7	3.57333	0.000397768	0.00110129	None	None	3.40037
LRRC40	-0.653228	0.00781445	0.0167426	None	None	2.1071
SRSF11	-0.0322087	0.848943	0.931472	None	None	0.0711216
ANKRD13C	1.36173	2.05354e-34	1.92212e-32	None	None	33.6875
HHLA3	2.37435	2.59052e-15	3.97043e-14	None	None	14.5866
CTH	10.371	3.23519e-13	3.72242e-12	None	None	12.4901
PTGER3	2.18779	0.165012	0.248611	None	None	0.782485
ZRANB2-AS1	9.5557	2.11957e-08	1.15688e-07	None	None	7.67375
ZRANB2	-0.422996	0.00181529	0.00444253	None	None	2.74105
ZRANB2-AS2	-1.6834	0.309911	0.424175	None	None	0.508764
NEGR1	-8.11822	6.35201e-13	7.03123e-12	None	None	12.1971
AL513166.1	-4.9943	0.0120112	0.024637	None	None	1.92041
AL583808.1	-1.32335	0.628792	0.744956	None	None	0.201493
LRRIQ3	0.57472	0.746853	0.850666	None	None	0.126765
FPGT	-0.338738	NA	NA	None	None	NA
TNNI3K	-0.61493	0.464233	0.588931	None	None	0.333264
ERICH3	NA	NA	NA	None	None	NA
CRYZ	1.88775	1.10235e-05	3.94938e-05	None	None	4.95768
TYW3	0.279826	0.284307	0.394797	None	None	0.546212
SLC44A5	-3.05792	1.4287e-21	4.41647e-20	None	None	20.8451
ACADM	4.72311e-05	0.999931	1	None	None	3.00093e-05
RABGGTB	1.36513	1.62644e-12	1.70827e-11	None	None	11.7888
MSH4	-3.23334	1.11045e-27	6.03966e-26	None	None	26.9545
AC092813.1	-5.10898	0.139456	0.214951	None	None	0.855564
ST6GALNAC3	-4.48297	0.0011297	0.00288101	None	None	2.94704
ST6GALNAC5	1.71746	0.506607	0.630408	None	None	0.295329
AL035409.1	NA	NA	NA	None	None	NA
PIGK	-0.104639	0.713507	0.821055	None	None	0.146602
AK5	2.83411	0.0102687	0.0213987	None	None	1.98849
AC118549.1	1.11134	5.18791e-13	5.82272e-12	None	None	12.285
USP33	-1.09841	6.2196e-15	9.03706e-14	None	None	14.2062
MIGA1	0.276557	0.217271	0.314558	None	None	0.662999
NEXN-AS1	8.77367	3.18568e-12	3.21346e-11	None	None	11.4968
NEXN	0.618526	0.0376991	0.0687563	None	None	1.42367
FUBP1	0.235692	0.130262	0.202789	None	None	0.885182
DNAJB4	0.875701	NA	NA	None	None	NA
GIPC2	0.678768	0.0181531	0.035731	None	None	1.74105
AC103591.3	7.15241	0.000240045	0.000692668	None	None	3.61971
AC096531.2	-3.68509	0.397305	NA	None	None	0.400876
PTGFR	-5.0223	0.241678	0.344199	None	None	0.616763
IFI44L	-10.1178	6.22325e-06	2.32307e-05	None	None	5.20598
IFI44	-9.36021	0.00155168	0.00384652	None	None	2.8092
ADGRL4	-7.3553	1.23978e-10	9.76487e-10	None	None	9.90666
AC099671.1	-4.47215	0.299355	NA	None	None	0.523814
AL606519.1	NA	NA	NA	None	None	NA
AL136234.1	-2.10378	4.54143e-08	2.35667e-07	None	None	7.34281
LINC01781	7.34542	1.53549e-07	7.31537e-07	None	None	6.81375
ADGRL2	-0.279611	0.458174	0.582898	None	None	0.33897
AL157944.1	-0.640519	0.119534	0.1884	None	None	0.92251
LINC01362	6.77242	5.24443e-05	0.000169377	None	None	4.2803
AC116099.1	-8.00838	0.0596728	0.103095	None	None	1.22422
LINC01725	-5.00625	5.13219e-24	2.05737e-22	None	None	23.2897
TTLL7	-0.0955778	0.897304	0.964808	None	None	0.0470604
AC104454.2	NA	NA	NA	None	None	NA
AL359504.2	4.84028	0.251175	0.355986	None	None	0.600023
PRKACB	-1.69104	0.000862985	0.00225132	None	None	3.064
SAMD13	-0.775572	0.738073	0.84368	None	None	0.131901
RPF1	0.137036	0.331213	0.448451	None	None	0.479892
GNG5	1.36917	1.94993e-08	1.07185e-07	None	None	7.70998
SPATA1	2.84479	4.29907e-09	2.63764e-08	None	None	8.36663
CTBS	0.933476	0.00113425	0.00289151	None	None	2.94529
AL359762.1	2.71762	0.353461	0.472691	None	None	0.451658
SSX2IP	-0.340132	0.393865	0.516126	None	None	0.404652
LPAR3	3.84784	0.00733592	0.0158128	None	None	2.13455
MCOLN2	-0.550468	0.738309	0.843852	None	None	0.131762
WDR63	0.386154	0.680621	0.792135	None	None	0.167095
MCOLN3	-7.02664	1.70989e-05	5.96392e-05	None	None	4.76703
SYDE2	-0.46637	0.233481	0.334231	None	None	0.631749
C1orf52	0.118068	0.536169	0.65993	None	None	0.270698
BCL10	0.479212	0.0123467	0.0252608	None	None	1.90845
AL078459.1	0.500694	0.375558	0.496044	None	None	0.425323
DDAH1	1.28628	0.0749132	0.126028	None	None	1.12544
AC092807.3	NA	NA	NA	None	None	NA
CCN1	2.07165	0.166214	0.250123	None	None	0.779333
ZNHIT6	-1.30872	0.0005859	0.0015744	None	None	3.23218
COL24A1	-5.01796	0.0470247	0.0835339	extracellular matrix organization	None	1.32767
LINC02795	1.65529	0.699811	NA	None	None	0.155019
ODF2L	1.61515	5.5114e-05	0.000177175	None	None	4.25874
CLCA4-AS1	-2.91374	0.00332643	0.00771922	None	None	2.47802
AL049597.2	NA	NA	NA	None	None	NA
SH3GLB1	-0.873105	0.000267372	0.000763746	None	None	3.57288
AL355981.1	-0.0683328	0.987393	NA	None	None	0.00550987
SELENOF	0.687795	2.83029e-05	9.5485e-05	None	None	4.54817
HS2ST1	0.208298	0.43448	0.558439	None	None	0.36203
LINC01140	-0.0649627	0.961999	1	None	None	0.0168256
LINC02801	-3.73781	0.02416	0.0462603	None	None	1.6169
LMO4	1.28987	2.4247e-08	1.30992e-07	None	None	7.61534
PKN2-AS1	-3.13299	1.86582e-33	1.6115e-31	None	None	32.7291
PKN2	-0.807141	0.00276039	0.00650774	None	None	2.55903
GTF2B	0.388354	0.00896612	0.0189393	None	None	2.0474
KYAT3	-0.443153	0.00366352	0.00841989	None	None	2.4361
RBMXL1	-0.168145	NA	NA	None	None	NA
GBP3	-3.58981	4.63101e-24	1.86017e-22	None	None	23.3343
GBP1	-1.95613	0.00113881	0.00290167	immune response-regulating cell surface receptor signaling pathway	None	2.94355
GBP2	-3.04447	3.03702e-19	7.37238e-18	None	None	18.5176
AC104459.1	-7.72063	0.00292131	0.00685339	None	None	2.53442
GBP4	-6.63669	0.00300351	0.00703312	None	None	2.52237
GBP5	-5.96395	0.162434	NA	positive regulation of cytokine production	None	0.789324
AL596214.1	4.50803	0.0377372	0.0688133	None	None	1.42323
LRRC8B	2.14825	1.66836e-05	5.83186e-05	None	None	4.77771
LRRC8C-DT	5.61513	1.47601e-07	7.05538e-07	None	None	6.83091
LRRC8C	0.200609	0.897273	0.964808	None	None	0.0470752
AC099568.2	7.70005	2.79684e-05	9.4388e-05	None	None	4.55333
LRRC8D	4.05148	NA	NA	None	None	NA
ZNF326	0.940665	1.01838e-19	2.60405e-18	None	None	18.9921
AC098656.1	-0.249609	0.952338	NA	None	None	0.021209
AL627316.1	0	1	NA	None	None	0
LINC02609	-0.0155485	0.977541	1	None	None	0.00986511
AC091614.1	-2.59822	0.555523	NA	None	None	0.255298
ZNF644	-1.69141	1.22697e-13	1.49939e-12	None	None	12.9112
HFM1	-2.30373	1.26832e-05	4.5039e-05	None	None	4.89677
CDC7	-0.827603	0.00030458	0.000861715	None	None	3.5163
TGFBR3	0.392878	0.10071	0.162669	None	None	0.996928
BRDT	11.6745	7.33411e-19	1.69646e-17	None	None	18.1347
EPHX4	6.85464	1.03373e-05	3.72075e-05	None	None	4.98559
BTBD8	-0.576557	0.0166205	0.0329821	None	None	1.77936
C1orf146	-0.674644	0.878344	0.949597	None	None	0.0563352
GLMN	0.948307	1.31731e-07	6.34474e-07	None	None	6.88031
RPAP2	-0.581795	0.00091342	0.00237336	None	None	3.03933
GFI1	0.173273	0.938827	0.995631	None	None	0.0274143
EVI5	-0.543076	2.46526e-05	8.39015e-05	None	None	4.60814
RPL5	2.72438	2.76681e-11	2.42717e-10	None	ribosome biogenesis	10.558
DIPK1A	0.220005	NA	NA	None	None	NA
AC093577.1	-5.08451	0.186866	0.276649	None	None	0.72847
MTF2	-0.127482	0.349607	0.468658	None	None	0.45642
TMED5	1.01444	0.000167625	0.000496803	None	None	3.77566
CCDC18	1.19698	1.90356e-05	6.58654e-05	None	None	4.72043
CCDC18-AS1	-0.843032	0.698605	0.808145	None	None	0.155768
DR1	0.0979446	0.633837	0.749212	None	None	0.198023
FNBP1L	1.39496	0.000322528	0.000907898	None	None	3.49143
BCAR3	-1.36669	1.06085e-07	5.20062e-07	None	None	6.97435
AL109613.1	7.37324	2.67985e-10	1.99516e-09	None	None	9.57189
AL049796.1	2.15554	0.351842	0.471152	None	None	0.453652
DNTTIP2	0.756483	0.00729931	0.015744	None	None	2.13672
GCLM	-1.13053	0.0017589	0.00431975	None	None	2.75476
ABCA4	1.0622	0.279961	0.389784	None	None	0.552902
ARHGAP29	-0.00939813	0.982151	1	None	None	0.00782184
ARHGAP29-AS1	-6.31633	3.0885e-06	1.21132e-05	None	None	5.51025
AC097059.1	-2.59822	0.555523	NA	None	None	0.255298
ABCD3	-0.727616	0.000217376	0.000631603	None	None	3.66279
F3	-1.07261	0.202616	0.296348	positive regulation of cytokine production	None	0.693326
SLC44A3	0.752563	0.00932638	0.0196117	None	None	2.03029
CNN3	0.155206	0.501226	0.625259	None	None	0.299966
AC105942.1	-3.23314	0.000193222	0.000566492	None	None	3.71394
ALG14	-1.30967	4.84415e-09	2.95137e-08	None	None	8.31478
TLCD4	-0.00676365	0.996669	1	None	None	0.00144924
AC092802.1	0.919764	0.477459	0.601881	None	None	0.321064
RWDD3	-0.655311	0.673707	0.786044	None	None	0.171529
AC092802.4	NA	NA	NA	None	None	NA
LINC01787	0	1	NA	None	None	0
PTBP2	-0.275989	0.163406	0.246506	None	None	0.786731
DPYD	-9.11751	4.40443e-19	1.04522e-17	None	None	18.3561
DPYD-AS1	-8.12771	0.0142068	0.0286413	None	None	1.8475
DPYD-IT1	NA	NA	NA	None	None	NA
MIR137HG	-13.4054	0.00159815	0.00395344	None	None	2.79638
BX005019.1	-5.72594	0.180265	NA	None	None	0.74409
SNX7	0.214821	0.316292	0.431793	None	None	0.499912
AL445433.2	0	1	NA	None	None	0
PLPPR4	-1.28631	0.765715	NA	None	None	0.115933
LINC01708	5.56457	1.75761e-05	6.11835e-05	None	None	4.75508
PALMD	1.60261	0.183341	0.271931	None	None	0.73674
FRRS1	3.6207	3.97754e-15	5.9108e-14	None	None	14.4004
AGL	-0.443777	0.100467	0.162354	None	None	0.997978
AC118553.1	0	1	1	None	None	0
SLC35A3	-0.474123	NA	NA	None	None	NA
MFSD14A	0.780263	NA	NA	None	None	NA
AC093019.2	6.13292	1.41185e-20	4.00735e-19	None	None	19.8502
SASS6	0.628888	0.00192546	0.00468594	None	None	2.71546
TRMT13	-0.417277	0.0678198	0.115427	None	None	1.16864
LRRC39	1.04803	0.00181972	0.00445228	None	None	2.74
DBT	0.254394	0.383194	0.504639	None	None	0.416582
AL445928.2	1.18076	0.413016	0.53607	None	None	0.384033
RTCA-AS1	-0.372416	0.755868	0.858075	None	None	0.121554
RTCA	-1.38754	0.000848085	0.0022159	None	None	3.07156
CDC14A	-0.834122	0.000461923	0.00126414	None	None	3.33543
AL589990.1	7.64576	7.38792e-09	4.37793e-08	None	None	8.13148
LINC01349	NA	NA	NA	None	None	NA
VCAM1	-2.59822	0.555523	0.677536	cell-substrate adhesion	None	0.255298
EXTL2	0.512894	0.042509	0.0764592	None	None	1.37152
AC104506.1	1.02958	0.45956	0.584367	None	None	0.337658
SLC30A7	-0.592689	4.65319e-05	0.000151424	None	None	4.33225
DPH5	-0.177582	0.511043	0.63479	None	None	0.291543
AC093157.2	NA	NA	NA	None	None	NA
AC093157.1	-0.1138	0.608565	0.727027	None	None	0.215693
S1PR1	-6.84079	0.10825	0.172987	None	None	0.965572
LINC01307	-9.91529	2.8254e-09	1.78743e-08	None	None	8.54892
LINC01709	NA	NA	NA	None	None	NA
OLFM3	0.400265	0.926781	0.986749	None	None	0.0330227
AC099567.1	4.23564	0.0113821	0.0234903	None	None	1.94378
COL11A1	-3.90274	9.64656e-07	4.06805e-06	connective tissue development	None	6.01563
AC095032.1	-1.27211	0.453334	0.577947	None	None	0.343582
RNPC3	-0.251944	0.0625272	0.107308	None	None	1.20393
AMY2B	-2.52676	6.14251e-14	7.82354e-13	None	None	13.2117
AL591888.1	-0.674644	0.878344	NA	None	None	0.0563352
LINC01676	0	1	1	None	None	0
LINC01677	NA	NA	NA	None	None	NA
AL355306.2	0	1	NA	None	None	0
PRMT6	1.18221	0.419225	0.54233	None	None	0.377553
NTNG1	0.935977	0.376045	0.49659	None	None	0.42476
VAV3	-0.105013	0.612937	0.731077	None	None	0.212584
VAV3-AS1	NA	NA	NA	None	None	NA
LINC02785	-2.59822	0.555523	NA	None	None	0.255298
SLC25A24	0.0100987	0.979734	1	None	None	0.00889199
FAM102B	0.204389	0.710073	0.817837	None	None	0.148697
HENMT1	2.12859	0.0416546	0.075153	None	None	1.38034
AL160171.1	-1.17908	0.59518	0.714387	None	None	0.225352
PRPF38B	0.323566	0.0921271	0.150509	None	None	1.03561
FNDC7	4.22519	0.0293528	0.0549433	None	None	1.53235
STXBP3	-0.0876399	0.541153	0.664761	None	None	0.26668
AKNAD1	1.57362	0.0108718	0.0225505	None	None	1.9637
SPATA42	-10.0292	1.36653e-06	5.63527e-06	None	None	5.86438
GPSM2	2.36404	1.06859e-39	1.47289e-37	None	None	38.9712
CLCC1	-0.46807	NA	NA	None	None	NA
WDR47	1.04447	3.78977e-05	0.000125189	None	None	4.42139
TAF13	2.10263	1.95648e-15	3.04032e-14	None	None	14.7085
AL356488.3	1.38525	0.124115	0.194645	None	None	0.906177
TMEM167B	0.112201	0.537612	0.661384	None	None	0.269531
AL356488.2	-8.90775	1.22425e-05	4.35847e-05	None	None	4.91213
KIAA1324	0.410068	0.335658	0.453342	None	None	0.474102
SARS	-0.83994	2.46549e-09	1.5781e-08	None	None	8.6081
CELSR2	-4.1107	1.14166e-05	4.08079e-05	None	None	4.94246
PSRC1	2.93967	0.0624509	0.107205	None	None	1.20446
MYBPHL	0	1	1	None	None	0
SORT1	-0.936566	0.000172738	0.000511279	None	None	3.76261
PSMA5	0.0321204	0.749581	0.852621	None	None	0.125181
SYPL2	3.97639	0.152371	0.231932	None	None	0.817098
ATXN7L2	-1.62831	0.363247	0.483209	None	None	0.439798
CYB561D1	0.259883	0.217799	0.315209	None	None	0.661944
AMIGO1	NA	NA	NA	None	None	NA
GNAI3	0.344756	0.0589781	0.102044	None	None	1.22931
AL355310.1	NA	NA	NA	None	None	NA
AMPD2	1.13333	0.00106817	0.00273972	None	None	2.97136
GSTM4	-0.0292179	0.991926	1	None	None	0.00352077
GSTM2	0.781716	NA	NA	None	None	NA
GSTM3	7.36776	5.8032e-08	2.95323e-07	None	None	7.23633
LINC01768	0	1	NA	None	None	0
CSF1	-5.99487	0.091399	0.149586	connective tissue development	None	1.03906
AHCYL1	-0.328346	0.00162497	0.00401484	None	None	2.78915
STRIP1	-0.4622	0.00159441	0.00394515	None	None	2.7974
AL160006.1	-0.350906	0.820429	0.90986	None	None	0.0859591
LINC01397	NA	NA	NA	None	None	NA
SLC6A17	-4.50403	0.182997	0.27152	None	None	0.737557
LINC02586	NA	NA	NA	None	None	NA
KCNC4	-5.17336	2.3143e-06	9.25354e-06	None	None	5.63558
RBM15-AS1	-5.6815	1.36174e-05	4.81441e-05	None	None	4.86591
RBM15	-0.249604	0.24072	0.343053	None	None	0.618488
LAMTOR5-AS1	-0.387066	NA	NA	None	None	NA
SLC16A4	-3.22382	1.78671e-32	1.42117e-30	None	None	31.7479
AL355488.1	-0.101128	0.787187	0.884646	None	None	0.103922
LAMTOR5	0.232747	0.270451	0.37856	None	None	0.567911
PROK1	NA	NA	NA	None	None	NA
CD53	-1.29872	NA	NA	None	None	NA
AL360270.2	-2.72559	0.0458397	0.0817003	None	None	1.33876
AL360270.1	9.20543	1.69085e-14	2.29872e-13	None	None	13.7719
LRIF1	-0.0389038	0.841933	0.926458	None	None	0.0747224
AL360270.3	-2.59822	0.555523	NA	None	None	0.255298
DRAM2	-0.552213	0.0140876	0.0284181	None	None	1.85116
CEPT1	-1.07026	7.82517e-06	2.86837e-05	None	None	5.10651
AL355816.2	5.75206	3.16641e-07	1.43129e-06	None	None	6.49943
DENND2D	0.657154	0.0262793	0.0498251	None	None	1.58039
CHI3L2	1.42176	0.309446	0.423712	None	None	0.509415
PIFO	-6.06867	3.8486e-05	0.000126978	None	None	4.4147
OVGP1	1.43158	3.71213e-07	1.65749e-06	None	None	6.43038
AL390195.2	8.45556	3.38409e-06	1.31826e-05	None	None	5.47056
AL390195.1	3.03674	0.104903	0.168321	None	None	0.979211
WDR77	1.71044	4.883e-12	4.79344e-11	None	None	11.3113
ATP5PB	0.164095	0.318987	0.434882	None	None	0.496227
C1orf162	-4.626	0.00161293	0.00398755	None	None	2.79238
TMIGD3	-0.669884	0.799618	0.893724	None	None	0.0971177
ADORA3	NA	NA	NA	None	None	NA
RAP1A	0.506096	0.00800979	0.0171132	None	None	2.09638
LINC01160	NA	NA	NA	None	None	NA
INKA2	3.41544	3.81701e-17	7.23973e-16	None	None	16.4183
INKA2-AS1	0.400265	0.926781	NA	None	None	0.0330227
AL049557.1	-0.674644	0.878344	NA	None	None	0.0563352
DDX20	0.457702	0.0323416	0.0599688	None	None	1.49024
KCND3	-2.59823	0.403262	0.525428	None	None	0.394413
AL445426.1	-6.31087	0.138918	NA	None	None	0.857241
CTTNBP2NL	-0.783436	7.17048e-05	0.00022582	None	None	4.14445
WNT2B	-1.14901	0.00018049	0.000532264	connective tissue development	None	3.74355
ST7L	-1.18049	9.04786e-09	5.27155e-08	None	None	8.04345
CAPZA1	0.226523	0.0461495	0.0821506	None	None	1.33583
MOV10	-1.98592	1.38451e-49	3.27786e-47	None	None	48.8587
AL603832.1	-0.674647	0.839137	0.924392	None	None	0.0761673
RHOC	-0.96829	0.00268323	0.0063407	None	None	2.57134
PPM1J	-2.59822	0.555523	NA	None	None	0.255298
LINC01356	1.1435	0.13545	0.209661	None	None	0.86822
LINC01357	-0.944407	0.641398	0.756267	None	None	0.192872
SLC16A1	2.46803	1.22782e-21	3.81307e-20	None	None	20.9109
SLC16A1-AS1	-2.8063	1.15634e-26	5.78859e-25	None	None	25.9369
AL390242.1	5.93413	1.27368e-05	4.52214e-05	None	None	4.89494
LRIG2-DT	-0.571897	NA	NA	None	None	NA
LRIG2	-0.586502	2.84518e-06	1.12333e-05	None	None	5.54589
MAGI3	-2.21007	6.51617e-09	3.89345e-08	None	None	8.18601
PHTF1	0.138388	0.631626	0.747258	None	None	0.19954
RSBN1	-0.930137	3.54784e-18	7.67708e-17	None	None	17.45
AL137856.1	-1.37534	0.523898	0.648197	None	None	0.280754
PTPN22	-2.0694	0.215628	0.312584	positive regulation of cytokine production	None	0.666295
AP4B1-AS1	1.48101	0.397127	0.519216	None	None	0.401071
BCL2L15	0.898461	0.83541	NA	None	None	0.0781004
AP4B1	-1.96632	0.0322823	0.0598699	None	None	1.49104
DCLRE1B	2.4311	0.238874	0.340784	None	None	0.621831
HIPK1-AS1	0.87227	0.717367	0.824743	None	None	0.144258
HIPK1	-0.320431	0.065719	0.112231	None	None	1.18231
OLFML3	-3.54602	0.262166	0.368643	None	None	0.581423
SYT6	NA	NA	NA	None	None	NA
TRIM33	0.617259	0.0177251	0.0349535	None	None	1.75141
BCAS2	1.86936	2.10902e-12	2.18098e-11	None	None	11.6759
DENND2C	4.11975	5.33344e-12	5.20263e-11	None	None	11.273
AMPD1	1.89601	0.658222	NA	None	None	0.181628
NRAS	0.585177	0.00536123	0.0119228	None	None	2.27074
CSDE1	0.0316422	0.814564	0.905501	None	None	0.0890747
SIKE1	1.00931	2.52517e-06	1.00448e-05	None	None	5.59771
SYCP1	NA	NA	NA	None	None	NA
TSPAN2	1.06622	0.669096	0.78266	None	None	0.174512
NGF-AS1	2.67423	0.0977791	0.158673	None	None	1.00975
NGF	7.36817	4.30029e-06	1.64788e-05	None	None	5.3665
VANGL1	2.22512	0.00619855	0.0135823	None	None	2.20771
CASQ2	-0.674644	0.878344	NA	None	None	0.0563352
SLC22A15	-3.36879	2.69365e-16	4.66498e-15	None	None	15.5697
MAB21L3	6.97867	4.70544e-08	2.43488e-07	None	None	7.3274
AL355538.1	-3.96908	0.359859	NA	None	None	0.443867
ATP1A1	1.15906	0.000389958	0.00108152	None	None	3.40898
ATP1A1-AS1	0.0867061	0.954045	1	None	None	0.0204312
LINC01762	1.75952	0.000434356	0.0011951	None	None	3.36215
AL390066.1	-3.38848	0.438893	NA	None	None	0.357642
AL390066.2	-3.99432	0.356646	NA	None	None	0.447762
CD58	0.536802	0.0501942	0.0885127	None	None	1.29935
IGSF3	-1.06641	7.85162e-07	3.34192e-06	None	None	6.10504
CD2	-6.05011	0.156325	NA	positive regulation of cytokine production	None	0.805971
AL157904.1	-0.674644	0.878344	NA	None	None	0.0563352
PTGFRN	-1.37868	0.00569941	0.0125914	None	None	2.24417
CD101	-0.514342	0.604085	0.722404	None	None	0.218902
AL445231.1	-2.42203	0.16076	0.243023	None	None	0.793823
TTF2	-0.436527	0.0491393	0.0869344	None	None	1.30857
TRIM45	-2.75561	1.66298e-08	9.24215e-08	None	None	7.77911
VTCN1	-3.64612	2.99758e-05	0.00010074	positive regulation of cytokine production	None	4.52323
LINC01525	-0.386884	0.847586	0.930693	None	None	0.0718164
AL358072.1	-4.94072	0.00177828	0.00436257	None	None	2.75
MAN1A2	0.300974	0.178361	0.26566	None	None	0.748701
TENT5C	2.19326	0.109035	0.173986	None	None	0.962436
GDAP2	0.279334	0.0934463	0.152478	None	None	1.02944
WDR3	2.50572	6.31214e-18	1.32247e-16	None	ribosome biogenesis	17.1998
SPAG17	3.42472	1.23851e-09	8.31627e-09	None	None	8.9071
TBX15	0.186512	0.894444	0.962556	None	None	0.0484469
WARS2	0.452185	0.0885853	0.145478	None	None	1.05264
WARS2-AS1	-0.382112	NA	NA	None	None	NA
AL359915.1	5.01919	1.06973e-08	6.15594e-08	None	None	7.97072
LINC01780	0	1	NA	None	None	0
HSD3B2	NA	NA	NA	None	None	NA
HSD3B1	-0.825814	0.0012382	0.00313075	None	None	2.90721
LINC00622	-4.26446	0.0604884	0.104325	None	None	1.21833
ZNF697	0.753362	0.00689674	0.0149639	None	None	2.16136
PHGDH	4.33295	9.97815e-16	1.60769e-14	None	None	15.0009
HMGCS2	-4.75266	1.3875e-06	5.72055e-06	connective tissue development	None	5.85777
NOTCH2	-1.7048	1.2095e-06	5.02994e-06	None	None	5.9174
SEC22B	-0.605586	0.0049747	0.0111445	None	None	2.30323
NBPF26	0.827446	0.0459545	0.0818759	None	None	1.33767
AC253572.2	0.00397287	0.998687	1	None	None	0.000570527
LINC00623	1.579	0.00704175	0.0152442	None	None	2.15232
FCGR1B	-3.01574	0.486562	NA	None	None	0.312862
AC244453.3	2.02884	0.32881	0.445798	None	None	0.483055
AC244453.2	0	1	NA	None	None	0
AC244453.1	0	1	1	None	None	0
FAM72B	0	1	1	None	None	0
SRGAP2C	-0.376274	0.157616	0.238971	None	None	0.802401
LINC02798	-2.48119	0.108268	0.173002	None	None	0.965499
AC239800.2	NA	NA	NA	None	None	NA
LINC02591	-0.501086	0.800148	0.894199	None	None	0.0968296
HIST2H3PS2	6.07628	0.0110099	0.0228017	None	None	1.95821
AC246680.1	0	1	1	None	None	0
LINC02802	-1.64089	0.203195	0.297086	None	None	0.692087
NBPF15	-0.22405	0.745549	0.849475	None	None	0.127524
FP700111.1	-0.901953	0.571374	0.692295	None	None	0.24308
SRGAP2B	-0.937498	0.00512407	0.0114422	None	None	2.29038
FAM72D	0	1	NA	None	None	0
NBPF20	-0.259242	0.919685	0.981739	None	None	0.0363609
GPR89A	1.56355	2.01099e-12	2.08174e-11	None	None	11.6966
PDZK1	6.89994	1.23888e-05	4.40325e-05	None	None	4.90697
CD160	-0.435693	0.748862	0.851995	None	None	0.125598
RNF115	-2.28068	5.96873e-18	1.25512e-16	None	None	17.2241
POLR3C	-0.255923	0.178477	0.265775	None	None	0.748417
NUDT17	3.647	0.0496476	0.0877026	None	None	1.3041
PIAS3	-0.041467	0.846713	0.930039	None	None	0.072264
ANKRD35	NA	NA	NA	None	None	NA
ITGA10	-4.59441	0.00968506	0.0203065	cell-substrate adhesion	None	2.0139
PEX11B	-1.34406	0.000326226	0.000917279	None	None	3.48648
RBM8A	0.977384	6.83192e-06	2.52917e-05	None	None	5.16546
LIX1L-AS1	2.93041	2.16938e-05	7.43599e-05	None	None	4.66366
LIX1L	-2.67806	0.135822	0.210155	None	None	0.86703
ANKRD34A	-0.674644	0.878344	0.949597	None	None	0.0563352
POLR3GL	3.36728	0.0790175	0.131787	None	None	1.10228
TXNIP	-11.81	1.88232e-19	4.67075e-18	None	None	18.7253
HJV	2.64072	0.536327	NA	None	None	0.27057
AC239799.2	8.20136	4.31204e-10	3.10801e-09	None	None	9.36532
LINC01719	-1.23205	0.000732852	0.0019339	None	None	3.13498
NBPF10	-1.14392	0.0167726	0.033251	None	None	1.7754
NOTCH2NLA	-0.774903	NA	NA	None	None	NA
AC239799.1	NA	NA	NA	None	None	NA
AC245407.2	7.26564	NA	NA	None	None	NA
NBPF12	0.0444162	0.895866	0.963571	None	None	0.0477568
PRKAB2	1.46907	3.07894e-05	0.000103164	None	None	4.5116
AC242426.2	-1.5204	9.89434e-08	4.8695e-07	None	None	7.00461
FMO5	3.79894	6.37084e-08	3.22208e-07	None	None	7.1958
CHD1L	0.702748	0.783668	0.881577	None	None	0.105868
LINC00624	2.88434	NA	NA	None	None	NA
BCL9	1.07476	9.95285e-06	3.59396e-05	None	None	5.00205
ACP6	1.735	2.18343e-10	1.64876e-09	None	None	9.66086
GJA5	0.423041	0.426634	0.550006	None	None	0.369944
GPR89B	2.5385	5.58696e-22	1.81929e-20	None	None	21.2528
LINC02804	1.71619	0.49797	0.6222	None	None	0.302797
NBPF11	-0.658854	0.000402793	0.0011142	None	None	3.39492
LINC02805	3.93883	0.141477	0.217683	None	None	0.849315
AC239809.3	-3.97756	3.87243e-06	1.49604e-05	None	None	5.41202
LINC01731	-1.50301	0.213072	0.309638	None	None	0.671473
LINC01138	-0.016038	NA	NA	None	None	NA
LINC02806	-1.79866	0.337089	0.454785	None	None	0.472256
AC245100.1	-3.21261	0.0313396	0.0582935	None	None	1.50391
AC245100.6	0	1	1	None	None	0
PPIAL4G	0	1	NA	None	None	0
NBPF14	-1.07981	0.00648055	0.0141401	None	None	2.18839
NUDT4B	NA	NA	NA	None	None	NA
PDE4DIP	-0.475988	0.277496	0.386913	None	None	0.556744
AC239804.1	0	NA	NA	None	None	NA
NBPF9	-0.986791	0.00410237	0.00933049	None	None	2.38696
AC245297.3	0.211796	0.594564	0.713902	None	None	0.225802
NOTCH2NLC	-1.13486	NA	NA	None	None	NA
NBPF19	-2.8799	2.3305e-06	9.3109e-06	None	None	5.63255
AC242842.1	NA	NA	NA	None	None	NA
FCGR1A	-2.59822	0.555523	NA	immune response-regulating cell surface receptor signaling pathway	None	0.255298
HIST2H2BF	0.529859	0.100449	0.162337	None	None	0.998057
AC243772.2	-0.77245	0.674253	0.786509	None	None	0.171177
HIST2H4A	-1.82205	0.676026	NA	None	None	0.170036
HIST2H2AA4	8.28847	3.0401e-11	2.64844e-10	None	None	10.5171
HIST2H4B	-0.674644	0.878344	0.949597	None	None	0.0563352
AC239868.1	-5.18412	0.00872431	0.0184906	None	None	2.05927
HIST2H2BE	0.480921	0.018336	0.0360486	None	None	1.7367
HIST2H2AC	0.509006	0.224161	0.322884	None	None	0.64944
HIST2H2AB	-0.674646	0.854673	0.936176	None	None	0.0682002
BOLA1	-0.206623	0.369025	0.489392	None	None	0.432945
SV2A	2.84794	0.342403	0.460812	None	None	0.465462
SF3B4	1.54467	4.70047e-07	2.06804e-06	None	None	6.32786
MTMR11	-1.40449	1.03251e-09	7.02205e-09	None	None	8.98611
OTUD7B	-1.67062	1.00503e-23	3.88198e-22	None	None	22.9978
AC244033.2	3.42591	0.0908293	0.148739	None	None	1.04177
VPS45	-0.738191	0.00121843	0.00308269	None	None	2.9142
PLEKHO1	-5.20795	1.96789e-06	7.96337e-06	None	None	5.706
AC242988.2	NA	NA	NA	None	None	NA
ANP32E	1.859	1.06818e-19	2.72447e-18	None	None	18.9714
AC242988.1	0	1	NA	None	None	0
APH1A	0.114744	0.650427	0.764871	None	None	0.186802
C1orf54	1.21693	0.0060923	0.0133757	None	None	2.21522
CIART	NA	NA	NA	None	None	NA
MRPS21	1.41935	1.22837e-18	2.77437e-17	None	None	17.9107
PRPF3	-1.02164	1.375e-15	2.17024e-14	None	None	14.8617
RPRD2	-0.651916	6.18908e-07	2.67905e-06	None	None	6.20837
TARS2	-0.09411	0.740516	0.845511	None	None	0.130466
ECM1	1.23725	0.0221524	0.042717	None	None	1.65458
FALEC	1.47565	0.133173	0.206756	None	None	0.875585
AL356356.1	-0.281201	0.433297	0.557346	None	None	0.363214
ADAMTSL4	-2.58719	4.94394e-23	1.77664e-21	extracellular matrix organization	None	22.3059
ADAMTSL4-AS1	1.18005	0.570634	0.69169	None	None	0.243642
MCL1	1.27777	6.62548e-07	2.8575e-06	None	None	6.17878
ENSA	-1.08291	3.10951e-27	1.62113e-25	None	None	26.5073
GOLPH3L	-1.12373	3.05523e-10	2.25462e-09	None	None	9.51496
HORMAD1	-3.97477	0.0417102	0.0752331	None	None	1.37976
CTSS	-4.81537	2.04496e-08	1.12041e-07	extracellular matrix organization	None	7.68931
CTSK	-0.56416	0.013776	0.0278537	None	None	1.86088
ARNT	-0.233365	0.232447	0.332914	None	None	0.633676
CTXND2	3.0619	0.00667054	0.0145075	None	None	2.17584
SETDB1	-0.277121	0.0505376	0.089056	None	None	1.29639
CERS2	-0.212491	0.358618	0.478379	None	None	0.445368
ANXA9	6.05709	0.000421113	0.00116136	None	None	3.3756
MINDY1	-0.758622	0.41131	0.534358	None	None	0.385831
PRUNE1	-0.171366	0.419444	0.542508	None	None	0.377327
BNIPL	-0.192715	0.69361	0.803629	None	None	0.158885
C1orf56	3.37092	0.00199097	0.00483424	None	None	2.70094
CDC42SE1	-0.640377	7.00472e-09	4.16557e-08	None	None	8.15461
MLLT11	6.50111	6.22573e-05	0.000198238	None	None	4.20581
GABPB2	-3.98238	2.24579e-34	2.09233e-32	None	None	33.6486
SEMA6C	-4.54022	0.00463405	0.01045	mesenchyme development	None	2.33404
SCNM1	1.08819	3.09012e-05	0.000103491	None	None	4.51002
LYSMD1	-0.715407	0.000625989	0.00167385	None	None	3.20343
VPS72	-0.372396	0.0410856	0.0742197	None	None	1.38631
PIP5K1A	-1.15084	4.1432e-06	1.59179e-05	cell-substrate adhesion	None	5.38266
PSMD4	0.617861	5.74297e-05	0.000183973	None	None	4.24086
ZNF687-AS1	7.00297	4.08002e-08	2.13263e-07	None	None	7.38934
ZNF687	0.0729534	0.783114	0.881151	None	None	0.106175
PI4KB	-0.547408	5.50252e-06	2.07715e-05	None	None	5.25944
RFX5	6.1509	0.00215896	0.0051995	None	None	2.66575
SELENBP1	-2.59824	0.302726	0.416124	None	None	0.518951
PSMB4	1.08637	0.00174243	0.00428349	None	None	2.75885
POGZ	-2.06983	2.16579e-18	4.78423e-17	None	None	17.6644
CGN	0.407172	0.611214	0.729325	None	None	0.213807
TUFT1	-0.664938	0.0865179	0.14253	None	None	1.06289
AL365436.2	2.20885	0.0321785	0.0596885	None	None	1.49243
SNX27	-0.0864076	0.603886	0.722264	None	None	0.219045
AL391335.1	7.89223	1.21343e-09	8.1642e-09	None	None	8.91598
AL589765.1	-2.59822	0.555523	NA	None	None	0.255298
RIIAD1	NA	NA	NA	None	None	NA
MRPL9	0.585355	0.00671073	0.0145855	None	None	2.17323
OAZ3	0.245051	0.911682	0.975161	None	None	0.0401569
AL589765.4	0	1	NA	None	None	0
TDRKH	2.02699	6.01005e-11	5.01852e-10	None	None	10.2211
TDRKH-AS1	2.97286	0.0409897	0.074073	None	None	1.38733
RORC	6.26705	0.000832356	0.00217565	None	None	3.07969
C2CD4D	5.46351	0.0828653	0.137193	None	None	1.08163
C2CD4D-AS1	1.54273	0.37083	0.491283	None	None	0.430825
THEM5	10.218	3.4965e-09	2.17844e-08	None	None	8.45637
THEM4	1.47419	2.05359e-05	7.05858e-05	None	None	4.68749
AL450992.3	0	1	NA	None	None	0
S100A10	1.92863	0.00219462	0.00527211	None	None	2.65864
AL450992.1	6.44773	2.42329e-08	1.30951e-07	None	None	7.6156
S100A11	2.32077	6.25216e-16	1.03045e-14	None	None	15.204
TCHHL1	0.368482	0.928719	NA	None	None	0.0321159
TCHH	-3.49607	2.76562e-06	1.09386e-05	None	None	5.55821
FLG-AS1	-2.05199	0.327587	0.444528	None	None	0.484674
CRCT1	-3.23688	0.386823	0.508553	None	None	0.412488
IVL	NA	NA	NA	None	None	NA
AL161636.1	NA	NA	NA	None	None	NA
PGLYRP4	0.121266	0.958764	NA	None	None	0.0182885
S100A9	0.812503	0.0751173	0.12633	None	None	1.12426
S100A8	-3.68509	0.397305	NA	None	None	0.400876
S100A6	2.35948	2.51785e-11	2.22234e-10	None	None	10.599
S100A4	4.25795	0.00026799	0.000765405	None	None	3.57188
S100A2	NA	NA	NA	None	None	NA
BX470102.2	-7.69849	3.87745e-05	0.000127876	None	None	4.41145
S100A16	0.850672	0.679957	0.791591	None	None	0.167519
S100A13	-1.08429	0.0124393	0.0254261	positive regulation of cytokine production	None	1.90521
AL162258.2	0.300007	0.71289	0.820533	None	None	0.146978
CHTOP	-1.06054	3.45986e-19	8.29096e-18	None	None	18.4609
SNAPIN	2.19899	3.02276e-05	0.000101511	None	None	4.5196
ILF2	0.586033	0.00351064	0.00810092	None	None	2.45461
NPR1	3.99934	1.0093e-06	4.24209e-06	None	None	5.99598
INTS3	-0.987168	0.000526605	0.00142553	None	None	3.27851
SLC27A3	-1.87508	0.15279	0.232477	None	None	0.815905
GATAD2B	-1.66383	8.37518e-98	1.68542e-94	None	None	97.077
AL358472.5	1.23438	0.476575	0.601178	None	None	0.321869
DENND4B	-0.914631	0.000144354	0.000433111	None	None	3.84057
CRTC2	0.157374	0.528476	0.652617	None	None	0.276975
SLC39A1	0.945413	0.00221724	0.0053201	None	None	2.65419
AL358472.4	0.228109	0.787524	0.884975	None	None	0.103736
AL358472.3	1.92598	0.494975	NA	None	None	0.305417
CREB3L4	0.470169	0.448865	0.573339	None	None	0.347885
JTB	1.24657	4.15822e-16	7.03194e-15	None	None	15.3811
AL358472.2	-0.0699982	0.987279	1	None	None	0.00556019
RAB13	0.852727	0.000119082	0.000362928	None	None	3.92415
RPS27	2.69182	NA	NA	None	ribosome biogenesis	NA
NUP210L	2.30297	8.6668e-09	5.0745e-08	None	None	8.06214
TPM3	0.824792	1.33868e-08	7.57157e-08	None	None	7.87332
C1orf189	-2.27131	0.134689	0.208675	None	None	0.870668
C1orf43	-0.0897222	0.553716	0.676686	None	None	0.256713
UBAP2L	-0.965468	1.10526e-12	1.18246e-11	None	None	11.9565
HAX1	1.03793	0.000113204	0.00034606	None	None	3.94614
ATP8B2	-0.309048	0.832856	0.91984	None	None	0.07943
IL6R-AS1	-8.13203	0.0558147	0.0972313	None	None	1.25325
IL6R	-3.49672	0.00621664	0.013619	positive regulation of cytokine production	None	2.20644
SHE	-8.49332	5.56645e-05	0.000178802	None	None	4.25442
TDRD10	-7.77879	0.00985892	0.0206345	None	None	2.00617
UBE2Q1	-1.06192	7.84032e-05	0.000245417	None	None	4.10567
ADAR	-0.684113	0.0220817	0.042601	None	None	1.65597
KCNN3	-4.12312	0.00829238	0.0176532	None	None	2.08132
PMVK	2.15868	4.35729e-25	1.91873e-23	None	None	24.3608
AL451085.1	0.825539	0.787	0.884485	None	None	0.104025
PBXIP1	-0.142178	0.678993	0.790789	None	None	0.168135
PYGO2	0.502944	0.00447025	0.0101135	None	None	2.34967
AL451085.2	1.8949	0.527394	0.651521	None	None	0.277865
SHC1	-0.546755	0.302555	0.415946	None	None	0.519195
CKS1B	0.775374	0.0432843	0.0776547	None	None	1.36367
FLAD1	0.679797	0.00115066	0.00292965	None	None	2.93905
ZBTB7B	-0.274179	0.165753	0.249503	None	None	0.780539
DCST2	0.833614	0.424195	0.547387	None	None	0.372435
DCST1	2.0616	0.331863	0.449089	None	None	0.479042
ADAM15	3.35425	2.21987e-25	9.97157e-24	None	None	24.6537
EFNA4	6.62594	NA	NA	None	None	NA
EFNA1	1.12632	0.0111258	0.0230179	None	None	1.95367
SLC50A1	2.12968	2.97367e-15	4.50958e-14	None	None	14.5267
DPM3	2.48152	0.00362994	0.0083513	None	None	2.4401
KRTCAP2	1.05143	0.34382	0.462286	None	None	0.463669
TRIM46	7.08593	1.25799e-06	5.21867e-06	None	None	5.90032
MUC1	-10.0865	0.0175879	0.0347034	None	None	1.75479
AC234582.1	4.92647	NA	NA	None	None	NA
THBS3	-1.47161	3.67498e-06	1.42414e-05	connective tissue development	None	5.43474
MTX1	0.900647	0.00351294	0.00810437	None	None	2.45433
GBA	1.34063	0.000110307	0.000337666	None	None	3.9574
FAM189B	-0.10131	0.624762	0.741512	None	None	0.204286
SCAMP3	1.6494	1.95658e-11	1.74997e-10	None	None	10.7085
CLK2	-0.407747	0.00671059	0.0145855	None	None	2.17324
HCN3	-3.26465	0.117102	0.185032	None	None	0.931434
PKLR	1.07104	0.753435	0.855882	None	carbohydrate derivative catabolic process	0.122954
FDPS	3.18208	6.40121e-14	8.12731e-13	None	None	13.1937
RUSC1-AS1	-1.2293	0.342698	0.461116	None	None	0.465089
RUSC1	0.565005	0.0724518	0.122379	None	None	1.13995
ASH1L	-0.712454	3.45629e-11	2.98411e-10	None	None	10.4614
ASH1L-IT1	-0.674644	0.878344	NA	None	None	0.0563352
ASH1L-AS1	2.58808	0.0262771	0.0498251	None	None	1.58042
MSTO1	2.80315	0.000446376	0.00122466	None	None	3.3503
AL353807.5	2.17871	0.101182	0.163288	None	None	0.994899
YY1AP1	-0.167256	0.252374	0.357295	None	None	0.597955
DAP3	2.25866	3.33824e-14	4.39939e-13	None	None	13.4765
GON4L	-0.358332	0.0200796	0.0391401	None	None	1.69724
SYT11	-3.5539	0.415392	NA	None	None	0.381542
RIT1	-0.584489	0.00557091	0.0123319	None	None	2.25407
KHDC4	-0.128125	0.420524	0.543696	None	None	0.376209
ARHGEF2	-1.5741	8.14844e-11	6.62542e-10	positive regulation of cytokine production	None	10.0889
AL355388.2	-6.70227	0.0110081	0.0228001	None	None	1.95829
AL355388.1	NA	NA	NA	None	None	NA
AL355388.3	8.39847	2.54478e-09	1.6242e-08	None	None	8.59435
SSR2	2.13627	2.06881e-11	1.84542e-10	None	None	10.6843
UBQLN4	-0.329473	0.207923	0.302943	None	None	0.682097
LAMTOR2	0.63457	0.0108306	0.0224719	None	None	1.96535
RAB25	1.20675	5.04254e-07	2.20984e-06	None	None	6.29735
MEX3A	2.40679	0.233484	0.334231	None	None	0.631744
LMNA	-0.495763	0.0483125	0.0856374	None	None	1.31594
SEMA4A	-6.34213	1.65968e-20	4.65821e-19	mesenchyme development	None	19.78
SLC25A44	0.79896	0.000313212	0.000883776	None	None	3.50416
PMF1	-1.45764	NA	NA	None	None	NA
BGLAP	-5.5503	0.00120917	0.00306195	None	None	2.91751
PAQR6	-6.52673	6.27422e-06	2.34079e-05	None	None	5.20244
SMG5	0.142135	0.561375	0.683224	None	None	0.250747
TMEM79	0.0635144	0.674646	0.786774	None	None	0.170924
GLMP	2.04823	5.91852e-22	1.91486e-20	None	None	21.2278
CCT3	0.809865	2.10225e-10	1.59524e-09	None	None	9.67732
TSACC	8.22219	2.87224e-11	2.51309e-10	None	None	10.5418
C1orf61	2.99771	1.898e-05	6.56841e-05	None	None	4.7217
MEF2D	-1.41166	6.27082e-24	2.48413e-22	connective tissue development	None	23.2027
AL365181.1	NA	NA	NA	None	None	NA
IQGAP3	1.54575	0.0607828	0.104788	None	None	1.21622
NAXE	1.5377	0.0275709	0.0519998	None	None	1.55955
GPATCH4	2.51912	3.28641e-25	1.45995e-23	None	None	24.4833
NES	-3.43152	0.115416	0.182783	None	None	0.937736
AL590666.3	NA	NA	NA	None	None	NA
CRABP2	2.12958	0.473199	0.59827	None	None	0.324956
AL590666.1	NA	NA	NA	None	None	NA
ISG20L2	1.33889	1.79131e-12	1.87264e-11	None	ribosome biogenesis	11.7468
RRNAD1	-0.437521	0.00460002	0.0103802	None	None	2.33724
MRPL24	2.33049	0.000540878	0.00146063	None	None	3.2669
HDGF	-0.166716	0.380295	0.501191	None	None	0.419879
PRCC	-0.693989	7.76116e-10	5.37089e-09	None	None	9.11007
SH2D2A	0	1	NA	None	None	0
NTRK1	-4.15686	0.328656	NA	None	None	0.483258
INSRR	NA	NA	NA	None	None	NA
PEAR1	-6.86782	0.000477373	0.00130313	None	None	3.32114
LRRC71	NA	NA	NA	None	None	NA
ARHGEF11	-2.4558	8.24069e-17	1.5131e-15	None	None	16.084
ETV3L	-4.71794	0.272504	NA	None	None	0.564628
ETV3	0.705839	0.000150901	0.00045109	None	None	3.82131
LINC02772	-4.72833	0.271408	NA	None	None	0.566377
FCRL5	-4.54615	0.291085	NA	None	None	0.53598
FCRL3	-3.98594	0.357711	NA	immune response-regulating cell surface receptor signaling pathway	None	0.446468
FCRL2	-3.98594	0.357711	NA	None	None	0.446468
FCRL1	-7.35342	0.0840006	0.138753	None	None	1.07572
CD5L	0	1	NA	None	None	0
KIRREL1	-9.70342	6.34253e-13	7.02848e-12	None	None	12.1977
CD1D	NA	NA	NA	None	None	NA
AL138899.1	NA	NA	NA	None	None	NA
OR10K1	NA	NA	NA	None	None	NA
SPTA1	-10.0819	1.09937e-11	1.02615e-10	None	None	10.9589
MNDA	-6.40383	0.133094	0.206662	immune response-regulating cell surface receptor signaling pathway	None	0.875842
PYHIN1	-8.64196	0.00216897	0.00522109	None	None	2.66375
IFI16	-3.22495	4.68589e-11	3.97048e-10	positive regulation of cytokine production	None	10.3292
AIM2	-2.59822	0.555523	0.677536	positive regulation of cytokine production	None	0.255298
CADM3	-6.54727	0.124486	0.195152	None	None	0.904879
CADM3-AS1	-2.59822	0.555523	NA	None	None	0.255298
ACKR1	0	1	NA	None	None	0
AL513323.1	-5.18976	0.225839	NA	None	None	0.646201
DUSP23	-0.674644	0.878344	0.949597	None	None	0.0563352
FCRL6	-3.40065	0.437138	NA	None	None	0.359382
SLAMF8	NA	NA	NA	None	None	NA
AL590560.2	NA	NA	NA	None	None	NA
VSIG8	NA	NA	NA	None	None	NA
AL590560.3	-2.59822	0.555523	NA	None	None	0.255298
CFAP45	-7.39255	1.34164e-22	4.63107e-21	None	None	21.8724
TAGLN2	-1.46443	0.00665267	0.0144743	None	None	2.177
IGSF9	-4.40753	0.306709	NA	None	None	0.513274
LINC01133	-1.63643	0.70352	NA	None	None	0.152724
KCNJ10	-0.0699982	0.987279	NA	None	None	0.00556019
PIGM	-1.44484	0.206604	0.30126	None	None	0.684862
IGSF8	1.78962	0.025562	0.0485934	None	None	1.59241
ATP1A2	0	1	NA	None	None	0
ATP1A4	-2.91502	0.208539	0.303708	None	None	0.680813
CASQ1	-8.14408	0.000592748	0.0015911	None	None	3.22713
AL121987.2	1.12778	0.586065	0.70623	None	None	0.232054
PEA15	-0.542319	0.00563619	0.0124613	None	None	2.24901
DCAF8	-0.914565	0.0511391	0.0900135	None	None	1.29125
AL139011.1	-0.674645	0.862843	0.942612	None	None	0.0640683
PEX19	-0.0869597	0.953455	1	None	None	0.0206999
COPA	0.153677	0.291161	0.402648	None	None	0.535866
NCSTN	0.0175807	0.936067	0.993534	None	None	0.0286933
NHLH1	-3.40065	0.437138	NA	None	None	0.359382
VANGL2	-3.40065	0.437138	NA	None	None	0.359382
SLAMF6	-6.85712	0.107399	0.171791	positive regulation of cytokine production	None	0.968999
CD84	-7.61896	0.0733048	0.123622	positive regulation of cytokine production	None	1.13487
SLAMF1	-5.38806	0.208085	NA	positive regulation of cytokine production	None	0.68176
AL121985.1	-4.38178	0.309674	NA	None	None	0.509096
CD48	-4.47215	0.299355	NA	None	None	0.523814
SLAMF7	-3.38848	0.438893	NA	None	None	0.357642
LY9	-4.18782	0.332633	NA	positive regulation of cytokine production	None	0.478035
CD244	-4.38826	0.308926	NA	positive regulation of cytokine production	None	0.510145
F11R	0.279554	0.65117	0.765653	None	None	0.186306
TSTD1	2.99772	0.0691656	0.117459	None	None	1.16011
USF1	0.78841	0.0152026	0.0304444	None	None	1.81808
ARHGAP30	-0.291298	0.576942	0.697865	None	None	0.238868
NECTIN4	-0.0911814	0.798956	0.893327	None	None	0.0974769
AL591806.1	-12.0962	2.4663e-09	1.57812e-08	None	None	8.60795
KLHDC9	-7.66539	0.00560053	0.0123876	None	None	2.25177
PFDN2	1.25309	9.26974e-09	5.39301e-08	None	None	8.03293
NIT1	0.429728	0.149447	0.228116	None	None	0.825512
DEDD	-0.938003	3.94429e-10	2.86656e-09	None	None	9.40403
UFC1	1.41884	6.09544e-10	4.29047e-09	None	None	9.21499
AL590714.1	7.66867	7.59252e-05	0.000238143	None	None	4.11961
USP21	-1.42162	9.92365e-15	1.39751e-13	None	None	14.0033
PPOX	-0.536807	0.0167962	0.0332914	None	None	1.77479
B4GALT3	0.683335	2.85375e-05	9.62118e-05	None	None	4.54458
ADAMTS4	0	1	NA	None	None	0
NDUFS2	0.496034	0.0713219	0.120653	None	None	1.14678
FCER1G	-7.20969	0.0903024	0.147984	positive regulation of cytokine production	None	1.0443
TOMM40L	-0.513972	0.768789	0.868578	None	None	0.114193
NR1I3	3.25363	0.256636	0.362551	None	None	0.590682
PCP4L1	0.763014	0.149394	0.228054	None	None	0.825668
MPZ	1.12882	0.565712	0.687338	None	None	0.247405
SDHC	0.232081	0.223137	0.321755	None	None	0.651428
AL592295.4	-3.51776	0.000313639	0.000884606	None	None	3.50357
AL592295.5	-5.01651	0.0258845	0.0491322	None	None	1.58696
AL592295.3	4.50728	0.021811	0.0421515	None	None	1.66133
FCGR2A	-9.84346	3.2443e-11	2.81173e-10	None	None	10.4889
HSPA6	-1.85232	0.651976	0.766376	None	None	0.185769
FCGR3A	-6.45302	0.000131508	0.000397605	positive regulation of cytokine production	None	3.88105
FCGR3B	0	1	1	None	None	0
FCGR2B	-9.38334	2.09395e-09	1.3545e-08	immune response-regulating cell surface receptor signaling pathway	None	8.67903
DUSP12	1.1728	3.0071e-09	1.89583e-08	None	None	8.52185
ATF6	-0.9256	6.53092e-05	0.000207104	None	None	4.18503
OLFML2B	-7.92755	0.028831	0.0540773	extracellular matrix organization	None	1.54014
NOS1AP	0.279747	0.517345	0.641548	None	None	0.28622
C1orf226	-8.07025	1.37115e-07	6.58859e-07	None	None	6.86292
SH2D1B	-2.59822	0.555523	NA	None	None	0.255298
UHMK1	-0.462014	0.0542584	0.094758	None	None	1.26553
UAP1	-0.288284	0.173998	0.260143	None	None	0.759457
AL596325.2	-2.59822	0.555523	NA	None	None	0.255298
DDR2	-1.09094	0.00102574	0.00263896	extracellular matrix organization	None	2.98896
HSD17B7	5.33227	5.93988e-18	1.25167e-16	None	None	17.2262
RGS5	0.163853	0.76292	0.863693	None	None	0.117521
AL499616.1	6.09084	9.05187e-05	0.000281067	None	None	4.04326
AL592435.1	2.6051	0.197435	0.289908	None	None	0.704576
NUF2	5.78323	1.05707e-14	1.48035e-13	None	None	13.9759
PBX1	-1.08964	0.00373065	0.00856832	None	None	2.42822
AL391001.1	-3.03253	0.484039	NA	None	None	0.31512
AL357568.2	2.38451	NA	NA	None	None	NA
LRRC52-AS1	-3.40065	0.437138	NA	None	None	0.359382
LRRC52	0	1	NA	None	None	0
AL356441.1	2.69567	0.192354	0.283606	None	None	0.715898
MGST3	1.37056	1.19871e-31	8.93441e-30	None	None	30.9213
ALDH9A1	1.04692	4.35684e-05	0.000142518	None	None	4.36083
TMCO1	-0.132156	0.583618	0.703993	None	None	0.233872
TMCO1-AS1	0.597613	0.734854	0.840632	None	None	0.133799
UCK2	-0.686822	0.168418	0.252872	None	None	0.773612
AL358115.1	8.97821	6.90861e-11	5.70024e-10	None	None	10.1606
FAM78B	NA	NA	NA	None	None	NA
AL596087.2	NA	NA	NA	None	None	NA
POGK	-0.932001	1.12945e-07	5.50738e-07	None	None	6.94713
TADA1	-0.692781	0.017514	0.0345778	None	None	1.75662
ILDR2	-4.14602	4.99014e-08	2.56898e-07	None	None	7.30189
MAEL	-12.0402	1.21051e-26	6.02252e-25	None	None	25.917
GPA33	7.01574	2.51459e-08	1.35413e-07	None	None	7.59953
DUSP27	6.70652	4.89355e-05	0.000158656	None	None	4.31038
LINC01363	-5.07815	0.168036	NA	None	None	0.774599
AL451050.2	-0.274712	0.360239	0.480223	None	None	0.443409
POU2F1	-1.43384	4.04278e-16	6.84823e-15	None	None	15.3933
AL136984.1	-7.35163	0.00162316	0.00401086	None	None	2.78964
CD247	-0.658886	0.491886	0.616542	None	None	0.308135
CREG1	1.41291	0.000438469	0.00120559	None	None	3.35806
RCSD1	-5.54973	9.45948e-11	7.6206e-10	None	None	10.0241
MPZL1	3.97981	4.08705e-40	5.75159e-38	None	None	39.3886
ADCY10	3.7717	6.84076e-22	2.18985e-20	None	carbohydrate derivative catabolic process	21.1649
MPC2	1.90621	1.64724e-12	1.72832e-11	None	None	11.7832
DCAF6	1.13972	0.000265597	0.000759109	None	None	3.57578
GPR161	-2.31169	0.0776139	0.129866	None	None	1.11006
TIPRL	-1.20373	2.22305e-10	1.67679e-09	None	None	9.65305
SFT2D2	0.16798	0.301397	0.414608	None	None	0.520862
TBX19	-1.20721	0.000122428	0.000372277	None	None	3.91212
AL023755.1	10.3383	1.64777e-14	2.24659e-13	None	None	13.7831
XCL2	NA	NA	NA	None	None	NA
XCL1	-1.44818	0.546404	0.669824	positive regulation of cytokine production	None	0.262486
DPT	0	1	NA	None	None	0
LINC00970	-4.58323	0.00312976	0.00730131	None	None	2.50449
ATP1B1	6.78367	1.57964e-27	8.54533e-26	None	None	26.8014
NME7	2.83754	0.00025579	0.000733578	None	None	3.59212
BLZF1	-1.31072	1.64478e-12	1.72663e-11	None	None	11.7839
CCDC181	0.121461	0.789728	0.886512	None	None	0.102522
SLC19A2	0.891448	0.000106976	0.000328369	None	None	3.97071
Z99572.1	-0.745358	0.654965	0.769261	None	None	0.183782
F5	-3.11977	2.44528e-05	8.33199e-05	None	None	4.61167
SELP	0.766828	0.744177	0.848447	None	None	0.128324
C1orf112	-0.112427	0.617282	0.734866	None	None	0.209517
SELL	-7.18144	0.0661923	0.112876	None	None	1.17919
SELE	NA	NA	NA	None	None	NA
METTL18	1.79394	0.20977	0.305371	None	ribosome biogenesis	0.678257
SCYL3	-0.357696	0.00289945	0.00680609	None	None	2.53768
KIFAP3	-1.49453	1.88897e-05	6.5428e-05	None	None	4.72377
LINC01681	-9.15166	0.000166783	0.000494451	None	None	3.77785
GORAB-AS1	-4.09378	0.344165	NA	None	None	0.463233
GORAB	0.0238635	0.933698	0.991914	None	None	0.0297936
AL023495.1	-3.65847	0.338675	NA	None	None	0.470217
PRRX1	-5.54753	0.19458	NA	connective tissue development	None	0.710902
Z97200.1	NA	NA	NA	None	None	NA
BX284613.2	-2.21767	0.177222	0.264297	None	None	0.751482
MROH9	5.71424	0.000341936	0.000957307	None	None	3.46605
FMO1	3.42766	0.0279124	0.0525698	None	None	1.5542
FMO4	-1.6636	0.00189864	0.00462848	None	None	2.72156
PRRC2C	0.274678	0.101457	0.163652	None	None	0.993719
MYOCOS	1.743	0.171618	0.257005	None	None	0.765438
VAMP4	-1.26282	5.04509e-06	1.9167e-05	None	None	5.29713
EEF1AKNMT	1.28976	NA	NA	None	None	NA
DNM3	-1.31112	0.00715882	0.0154741	None	None	2.14516
DNM3OS	-5.87194	0.000522523	0.00141543	None	None	3.28189
PIGC	-2.05097	3.75677e-10	2.73917e-09	None	None	9.42519
C1orf105	3.66542	0.100193	0.161963	None	None	0.999163
SUCO	-0.555813	0.0263837	0.0499902	None	None	1.57866
FASLG	NA	NA	NA	None	None	NA
AL031599.1	-1.99188	0.0163108	0.032441	None	None	1.78752
Z97198.1	NA	NA	NA	None	None	NA
TNFSF4	1.60234	0.606543	NA	None	None	0.217138
AL645568.1	3.13144	6.51242e-45	1.20235e-42	None	None	44.1863
PRDX6	1.72823	7.67807e-24	3.01196e-22	None	None	23.1147
SLC9C2	3.95259	0.0411633	0.0743493	None	None	1.38549
AL139142.1	0	1	NA	None	None	0
ANKRD45	3.46902	0.317134	NA	None	None	0.498758
KLHL20	-0.974005	0.00183619	0.0044904	None	None	2.73608
CENPL	2.38702	1.99913e-14	2.70184e-13	None	None	13.6992
DARS2	1.05772	3.02119e-05	0.000101483	None	None	4.51982
GAS5	3.63795	0.0530123	0.0929448	None	None	1.27562
GAS5-AS1	2.32911	0.307703	0.421784	None	None	0.511868
ZBTB37	-1.36841	9.16498e-06	3.32497e-05	None	None	5.03787
SERPINC1	NA	NA	NA	None	None	NA
RC3H1	0.0490124	0.652945	0.767246	None	None	0.185124
RC3H1-IT1	-4.53415	0.064003	0.109645	None	None	1.1938
RABGAP1L-DT	0.31642	0.94143	NA	None	None	0.026212
RABGAP1L	-0.348063	0.0323829	0.0600399	None	None	1.48968
GPR52	-2.45095	0.575364	NA	None	None	0.240058
RABGAP1L-IT1	3.29644	0.439249	0.563381	None	None	0.357289
Z99127.1	1.45308	0.0773455	0.129503	None	None	1.11156
Z99127.4	0.183874	0.511719	0.635512	None	None	0.290968
CACYBP	1.94598	2.00345e-12	2.07501e-11	None	None	11.6982
MRPS14	0.541515	0.00270745	0.00639568	None	None	2.56744
TNN	-0.855661	0.845105	NA	None	None	0.0730893
KIAA0040	-0.226072	0.308343	0.422402	None	None	0.510966
Z94057.1	0.0248671	0.991076	1	None	None	0.0038931
TNR	3.54646	0.00862183	0.0182965	None	None	2.0644
LINC02803	0.972717	0.502764	0.626815	None	None	0.298636
COP1	-0.670051	2.80527e-08	1.49823e-07	None	None	7.55202
AL591043.2	-0.572365	0.668649	0.782319	None	None	0.174802
PAPPA2	-4.79187	1.06814e-18	2.42883e-17	None	None	17.9714
AL031290.1	0	1	NA	None	None	0
ASTN1	-2.09381	0.342364	0.46079	None	None	0.465512
BRINP2	-0.424118	0.874141	0.949597	None	None	0.0584187
LINC01645	-6.00845	0.0652777	NA	None	None	1.18524
AL136114.1	-0.419289	0.848343	0.931169	None	None	0.0714286
SEC16B	-3.77009	0.044071	0.0789043	None	None	1.35585
RASAL2-AS1	-1.1934	0.183525	0.272143	None	None	0.736305
RASAL2	-0.500473	0.0505488	0.0890679	None	None	1.29629
TEX35	3.6456	0.391984	NA	None	None	0.406732
C1orf220	0	1	NA	None	None	0
RALGPS2	1.10431	1.87095e-05	6.48707e-05	None	None	4.72794
ANGPTL1	4.63712	7.56622e-11	6.18451e-10	None	None	10.1211
FAM20B	-0.284889	0.235566	0.33678	None	None	0.627888
TOR3A	2.41274	0.000124848	0.000378837	None	None	3.90362
ABL2	-0.0179113	0.92226	0.983639	None	None	0.0351468
SOAT1	0.135319	0.61166	0.729814	None	None	0.21349
AXDND1	2.37388	0.0852424	0.140585	None	None	1.06934
TDRD5	-0.00939708	0.995002	1	None	None	0.00217618
FAM163A	5.9109	2.24769e-12	2.31132e-11	None	None	11.6483
LINC02818	-0.53554	0.750124	0.853109	None	None	0.124867
TOR1AIP2	-0.406898	0.0409259	0.0739806	None	None	1.388
AL353708.3	6.49373	1.42953e-09	9.48809e-09	None	None	8.84481
TOR1AIP1	-0.769014	0.000630587	0.00168458	None	None	3.20025
AL353708.1	NA	NA	NA	None	None	NA
CEP350	-0.868219	5.99348e-07	2.60109e-06	None	None	6.22232
QSOX1	2.02217	3.05772e-05	0.000102539	None	None	4.5146
LHX4	6.21289	2.67664e-14	3.57193e-13	None	None	13.5724
ACBD6	-0.275448	0.327816	0.444809	None	None	0.48437
XPR1	0.846829	9.46277e-08	4.66966e-07	None	None	7.02398
KIAA1614	3.11733	3.65798e-05	0.000121114	None	None	4.43676
AL162431.1	1.13653	0.383665	0.505104	None	None	0.416048
KIAA1614-AS1	1.21247	0.757134	0.859172	None	None	0.120828
STX6	1.80502	2.98826e-17	5.75462e-16	None	None	16.5246
MR1	4.04304	6.84417e-12	6.57747e-11	None	None	11.1647
IER5	1.98205	1.18172e-10	9.36255e-10	None	None	9.92749
LINC01732	2.12524	0.158814	0.240498	None	None	0.79911
CACNA1E	-0.103023	0.938887	0.995635	None	None	0.0273868
AL161734.2	NA	NA	NA	None	None	NA
AL355482.2	NA	NA	NA	None	None	NA
LINC01344	-3.71649	0.00921826	0.0194046	None	None	2.03535
GLUL	0.0697303	0.873015	0.949344	None	None	0.0589781
RGSL1	-2.59822	0.555523	NA	None	None	0.255298
RNASEL	-0.615395	0.622517	0.739698	None	None	0.205849
RGS16	9.91956	7.05089e-16	1.15642e-14	None	None	15.1518
NPL	0.224085	0.717788	0.825132	None	None	0.144004
AL355999.1	6.16414	8.09491e-07	3.44111e-06	None	None	6.09179
DHX9	0.554077	7.81851e-05	0.000244772	None	None	4.10688
SHCBP1L	8.80109	3.60013e-11	3.10274e-10	None	None	10.4437
LAMC1	0.0705149	0.873937	0.949597	None	None	0.0585197
LAMC2	2.79	0.00181118	0.00443462	None	None	2.74204
NMNAT2	-2.85327	1.25832e-06	5.21897e-06	None	None	5.90021
AL354953.1	0	1	NA	None	None	0
SMG7-AS1	6.22504	1.09644e-05	3.93102e-05	None	None	4.96001
SMG7	-0.649291	0.00290447	0.00681628	None	None	2.53693
NCF2	-2.44353	0.0403525	0.0730461	None	None	1.39413
AL137800.1	NA	NA	NA	None	None	NA
ARPC5	-1.02714	0.00715861	0.0154741	None	None	2.14517
RGL1	-1.21948	0.0428471	0.0769459	None	None	1.36808
COLGALT2	-3.51705	0.270301	NA	extracellular matrix organization	None	0.568153
TSEN15	-0.274138	0.326156	0.442885	None	None	0.486575
AL158011.1	7.53959	1.78142e-05	6.19587e-05	None	None	4.74923
AL445228.2	7.18316	0.000367219	0.00102297	None	None	3.43508
C1orf21	3.73953	2.36801e-78	1.90615e-75	None	None	77.6256
AL078645.1	1.5109	0.725176	NA	None	None	0.139557
AL713852.1	7.7841	1.49294e-05	5.24692e-05	None	None	4.82596
EDEM3	-0.127033	0.472509	0.597569	None	None	0.32559
NIBAN1	-0.564627	0.675092	0.787112	None	None	0.170637
LINC01633	0	1	1	None	None	0
RNF2	-0.0371641	0.812054	0.903409	None	None	0.0904152
TRMT1L	-1.49676	2.35296e-09	1.51088e-08	None	None	8.62839
SWT1	-1.42692	2.71911e-27	1.42128e-25	None	None	26.5656
IVNS1ABP	-1.21583	1.00263e-05	3.61657e-05	None	None	4.99886
AL078644.2	0	1	1	None	None	0
LINC01350	-4.70749	0.273609	NA	None	None	0.562869
AL133383.1	-8.19859	0.053826	0.0941253	None	None	1.26901
HMCN1	-8.27128	1.08438e-13	1.3396e-12	extracellular matrix organization	None	12.9648
PRG4	1.25101	0.580936	0.701768	None	None	0.235872
TPR	-0.707324	9.80179e-07	4.12832e-06	None	None	6.00869
ODR4	0.404572	0.00604446	0.0132808	None	None	2.21864
AL096803.2	0.700638	0.600661	0.719376	None	None	0.221371
PLA2G4A	2.13645	0.319443	0.435386	None	None	0.495606
ERVMER61-1	1.16149	0.0373096	0.0681571	None	None	1.42818
AL136372.2	-20.7828	7.49028e-10	5.19595e-09	None	None	9.1255
LINC01701	NA	NA	NA	None	None	NA
BRINP3	-3.31634	0.164056	0.247375	None	None	0.785007
AL354771.1	0	1	NA	None	None	0
AL138927.1	-0.73312	0.846137	0.929559	None	None	0.0725592
LINC02770	-1.63644	0.614757	0.732689	None	None	0.211297
RGS18	-2.59822	0.555523	NA	None	None	0.255298
AL390957.1	-1.15902	0.00434003	0.00983989	None	None	2.36251
RGS1	-2.59822	0.555523	NA	None	None	0.255298
RGS2	3.32398	1.43054e-05	5.03555e-05	None	None	4.8445
UCHL5	-0.355856	0.0751153	0.12633	None	None	1.12427
RO60	-0.405791	NA	NA	None	None	NA
GLRX2	1.60283	2.73051e-10	2.03138e-09	None	None	9.56376
CDC73	-0.275017	0.144243	0.221415	None	None	0.840904
LINC01031	-0.602077	0.182629	0.271095	None	None	0.73843
AL138778.1	-3.52742	0.0771527	0.129223	None	None	1.11265
AL136456.1	-1.18032	0.390995	0.513133	None	None	0.407829
AL353072.2	2.85527	0.247647	0.351606	None	None	0.606166
AL353709.1	NA	NA	NA	None	None	NA
KCNT2	-8.49672	0.000359764	0.00100317	None	None	3.44398
CFH	-7.02684	0.0988699	0.160056	None	None	1.00494
ASPM	1.24563	0.00223316	0.00535512	None	None	2.65108
ZBTB41	-1.61831	1.54315e-10	1.1944e-09	None	None	9.81159
CRB1	-4.78736	0.000367076	0.00102271	None	None	3.43524
DENND1B	-1.07553	0.0018701	0.004565	positive regulation of cytokine production	None	2.72814
C1orf53	3.97902	0.13014	0.202658	None	None	0.885588
NEK7	-2.40605	4.20673e-25	1.8565e-23	None	None	24.3761
AL450352.1	0	1	NA	None	None	0
PTPRC	-5.64851	5.29826e-07	2.31485e-06	positive regulation of cytokine production	None	6.27587
AL157402.2	NA	NA	NA	None	None	NA
MIR181A1HG	0.742335	0.0918279	0.150154	None	None	1.03703
LINC01222	0	1	NA	None	None	0
AC105941.1	-3.41274	0.435398	NA	None	None	0.361113
LINC02789	-0.0705556	0.984728	NA	None	None	0.00668385
NR5A2	2.65238	1.99342e-05	6.87027e-05	None	None	4.7004
LINC00862	0.207011	0.545247	0.668732	None	None	0.263407
AC104461.1	5.4881	8.32171e-14	1.04081e-12	None	None	13.0798
ZNF281	0.205908	0.526302	0.650611	None	None	0.278765
AL359834.1	-0.30077	0.919885	NA	None	None	0.0362665
KIF14	1.40418	0.000178727	0.000527836	None	None	3.74781
DDX59	-1.7433	1.47517e-24	6.18466e-23	None	None	23.8312
DDX59-AS1	-2.83992	1.17676e-23	4.51931e-22	None	None	22.9293
CAMSAP2	-0.312933	0.0994267	0.160867	None	None	1.0025
INAVA	7.55733	3.33277e-09	2.08352e-08	None	None	8.4772
KIF21B	-3.40065	0.437138	NA	None	None	0.359382
TMEM9	8.37768	1.46417e-10	1.13984e-09	None	None	9.83441
PKP1	-11.5563	7.04083e-15	1.01352e-13	None	None	14.1524
TNNT2	-1.18112	0.279733	0.389547	None	None	0.553257
LAD1	-0.590875	0.0694012	0.117819	None	None	1.15863
AC119427.1	-2.59822	0.555523	NA	None	None	0.255298
TNNI1	1.20828	0.779192	NA	None	None	0.108355
PHLDA3	1.21667	7.75957e-05	0.000243041	None	None	4.11016
CSRP1	-0.214725	0.539586	0.663325	None	None	0.267939
AC096677.1	-2.65367	9.46488e-13	1.02129e-11	None	None	12.0239
NAV1	-2.2212	3.21979e-07	1.45378e-06	None	None	6.49217
IPO9-AS1	1.43482	9.7928e-05	0.000302626	None	None	4.00909
IPO9	0.0555172	0.744823	0.848984	None	None	0.127947
SHISA4	0.689527	0.873656	NA	None	None	0.0586594
AL513217.1	0	1	NA	None	None	0
LMOD1	-2.43335	0.0249572	0.0475965	None	None	1.6028
TIMM17A	0.977173	3.37258e-05	0.000112293	None	None	4.47204
RNPEP	0.613232	9.09621e-05	0.00028227	None	None	4.04114
ELF3-AS1	-0.278243	0.479157	0.603641	None	None	0.319522
ELF3	2.91692	1.0385e-13	1.2845e-12	None	None	12.9836
AL691482.3	NA	NA	NA	None	None	NA
GPR37L1	0.120098	0.968542	1	None	None	0.0138815
ARL8A	-0.783435	0.000321825	0.000906297	None	None	3.49238
PTPN7	-1.01355	0.770327	NA	None	None	0.113325
LGR6	-6.24067	0.143448	0.22034	None	None	0.843307
UBE2T	4.09156	3.25817e-07	1.47045e-06	None	None	6.48703
PPP1R12B	-0.248458	0.148181	0.22662	None	None	0.829208
SYT2	5.02608	3.1213e-18	6.8127e-17	None	None	17.5057
AC104463.2	-1.63644	0.607533	0.726053	None	None	0.21643
KDM5B	-0.448559	0.000134683	0.000406047	None	None	3.87069
PCAT6	1.6909	0.0765116	0.128256	None	None	1.11627
RABIF	0.909752	0.000150099	0.000449091	None	None	3.82362
KLHL12	-1.11853	0.000337928	0.000947403	mesenchyme development	None	3.47118
ADIPOR1	0.401059	0.0281509	0.0529595	None	None	1.55051
CYB5R1	0.0677656	0.783877	0.881764	None	None	0.105752
TMEM183A	0.221338	0.221909	0.32034	None	None	0.653825
PPFIA4	-2.29329	0.00218805	0.00525947	None	None	2.65994
ADORA1	-10.1058	7.58849e-41	1.1066e-38	None	None	40.1198
AC105940.2	-4.466	0.30005	NA	None	None	0.522806
AC105940.1	NA	NA	NA	None	None	NA
MYBPH	-4.69549	0.274883	NA	None	None	0.560852
CHI3L1	0	1	NA	None	None	0
CHIT1	0	1	NA	None	None	0
LINC01353	-2.59822	0.555523	NA	None	None	0.255298
LINC01136	0.525492	0.797223	0.892038	None	None	0.0984203
BTG2	0.324371	0.471661	0.596748	None	None	0.32637
FMOD	0	1	NA	None	None	0
PRELP	7.06596	2.26419e-06	9.0748e-06	None	None	5.64509
OPTC	9.10324	5.11656e-08	2.6307e-07	None	None	7.29102
ATP2B4	3.42274	1.15782e-30	7.97947e-29	None	None	29.9364
LAX1	3.64267	NA	NA	None	None	NA
ZC3H11A	-0.426841	0.754996	0.857181	None	None	0.122056
ZBED6	1.17437	0.361886	0.481812	None	None	0.441428
SNRPE	2.31197	3.27459e-15	4.92143e-14	None	None	14.4848
AL592146.2	2.30531	0.170111	0.255128	None	None	0.769269
SOX13	0.699076	5.10043e-06	1.93699e-05	None	None	5.29239
ETNK2	6.84658	3.41726e-07	1.53639e-06	None	None	6.46632
REN	-3.6486	0.00108476	0.00277625	None	None	2.96467
KISS1	-2.00985	0.00633409	0.0138506	None	None	2.19832
GOLT1A	0.974362	0.0173268	0.0342352	None	None	1.76128
PLEKHA6	-0.96348	3.91429e-05	0.000128943	None	None	4.40735
AL592114.3	6.45377	0.0216212	0.041845	None	None	1.66512
LINC00628	7.74171	0.0128584	0.0261719	None	None	1.89081
AL606489.1	4.76427	1.2098e-16	2.17375e-15	None	None	15.9173
PPP1R15B	0.439068	0.241946	0.344459	None	None	0.616281
PIK3C2B	0.22859	0.624092	0.741001	None	None	0.204751
MDM4	-0.68991	9.49102e-10	6.49209e-09	None	None	9.02269
AL512306.3	1.51705	7.4385e-06	2.73761e-05	None	None	5.12851
LRRN2	2.32965	0.197292	0.289761	None	None	0.70489
AL512306.2	4.42763	0.0504044	0.0888523	None	None	1.29753
NFASC	-9.10967	1.24081e-10	9.7692e-10	None	None	9.90629
CNTN2	3.02169	0.0842146	0.139084	None	None	1.07461
TMEM81	0	1	1	None	None	0
RBBP5	0.4489	0.0837964	0.138495	None	None	1.07677
DSTYK	0.158522	0.431505	0.555502	None	None	0.365014
TMCC2	-1.50273	0.347792	0.466684	None	None	0.458681
NUAK2	5.79414	3.59517e-09	2.23369e-08	None	None	8.44428
LEMD1	-2.26166	0.0681084	0.115859	None	None	1.1668
BLACAT1	-1.34858	0.00717355	0.0155026	None	None	2.14427
CDK18	1.57259	0.0186245	0.0365655	None	None	1.72992
MFSD4A	3.14327	0.058383	0.101171	None	None	1.23371
ELK4	-0.59254	0.00549019	0.0121719	None	None	2.26041
SLC45A3	-2.59822	0.555523	NA	None	None	0.255298
NUCKS1	0.0409087	0.821977	0.911125	None	None	0.0851403
RAB29	1.65401	0.0464505	0.0826279	None	None	1.33301
SLC41A1	5.101	4.75807e-15	7.0199e-14	None	None	14.3226
AC119673.2	-8.37098	5.30659e-06	2.00959e-05	None	None	5.27518
PM20D1	-2.59822	0.555523	NA	None	None	0.255298
RAB7B	3.62985	2.53833e-07	1.16544e-06	None	None	6.59545
RHEX	0.922742	0.436631	0.560595	None	None	0.359885
AC244035.1	NA	NA	NA	None	None	NA
FAM72A	-0.120952	0.966455	1	None	None	0.0148182
SRGAP2	-1.12547	5.77363e-09	3.47662e-08	cell-substrate adhesion	None	8.23855
IKBKE	1.09282	0.334681	0.452314	None	None	0.47537
AC244034.2	NA	NA	NA	None	None	NA
RASSF5	1.54667	0.0740417	0.124708	None	None	1.13052
EIF2D	-0.0602437	0.763481	0.864133	None	None	0.117202
DYRK3	-4.85128	0.258672	0.364787	None	None	0.587251
MAPKAPK2	0.092699	0.600498	0.719268	None	None	0.221488
IL10	NA	NA	NA	None	None	NA
IL19	0	1	NA	None	None	0
FCMR	-6.87751	0.106344	0.170332	None	None	0.973286
C1orf116	0.107603	0.979335	1	None	None	0.00906877
PFKFB2	4.13972	1.24819e-12	1.33113e-11	None	carbohydrate derivative catabolic process	11.9037
YOD1	2.17593	1.3782e-12	1.45896e-11	None	None	11.8607
C4BPB	1.77035	0.31602	0.431473	None	None	0.500286
C4BPA	NA	NA	NA	None	None	NA
CD55	1.133	0.000244466	0.000703954	None	None	3.61178
CR2	-4.07795	0.346132	NA	immune response-regulating cell surface receptor signaling pathway	None	0.460758
CR1	-9.3604	9.85144e-07	4.14663e-06	immune response-regulating cell surface receptor signaling pathway	None	6.0065
CR1L	-0.131105	0.721132	0.828266	None	None	0.141985
CD46	0.756608	0.000178752	0.000527836	None	None	3.74775
MIR29B2CHG	-0.722932	0.0127494	0.0259737	None	None	1.89451
CD34	-10.2082	2.15306e-12	2.21854e-11	positive regulation of cytokine production	None	11.6669
LINC02767	NA	NA	NA	None	None	NA
PLXNA2	-0.74355	0.112003	0.17805	None	None	0.950772
AC092810.3	NA	NA	NA	None	None	NA
MIR205HG	1.83424	0.260886	0.367189	None	None	0.58355
AL023754.1	-3.41274	0.435398	NA	None	None	0.361113
LAMB3	0.0577138	0.96188	1	None	None	0.0168791
HSD11B1-AS1	-5.20502	0.00155849	0.00386196	None	None	2.8073
G0S2	2.74635	0.519991	NA	None	None	0.284004
HSD11B1	2.30269	0.213428	0.310062	None	None	0.670749
TRAF3IP3	-4.65402	8.12721e-08	4.05132e-07	positive regulation of cytokine production	None	7.09006
C1orf74	-1.44286	0.363642	0.48367	None	None	0.439326
IRF6	-0.0563521	0.762354	0.863295	None	None	0.117843
UTP25	1.4836	1.75558e-05	6.11339e-05	None	ribosome biogenesis	4.75558
SYT14	-0.292346	0.923215	NA	None	None	0.0346972
SERTAD4-AS1	-5.68158	5.39472e-05	0.000173674	None	None	4.26803
SERTAD4	-1.26432	0.000673204	0.00178893	None	None	3.17185
HHAT	-1.95853	5.01205e-06	1.90558e-05	None	None	5.29998
KCNH1	-4.73189	0.000520098	0.00140943	None	None	3.28391
AC092017.4	-3.40065	0.437138	NA	None	None	0.359382
[truncated: 28,954 more rows]

## Sheet: STBoutvsfirst
gene name	log2FoldChange	pvalue	padj	Gotermfirst	GotermSTBout	pvalue_transformed
AL627309.1	-10.1062	0.0173578	0.0378677	None	None	1.76051
AL627309.5	0.891573	NA	NA	None	None	NA
AP006222.2	-0.2999	0.942066	NA	None	None	0.0259189
AL732372.1	-7.45707	NA	NA	None	None	NA
AC114498.1	-7.51299	1.10041e-07	7.74447e-07	None	None	6.95844
LINC01409	1.76414	0.271648	0.372335	None	None	0.565993
LINC01128	0.929295	0.563956	0.664588	None	None	0.248755
LINC00115	0.684892	0.441284	0.549386	None	None	0.355282
FAM41C	-6.07686	0.154011	0.234779	None	None	0.812449
AL645608.6	NA	NA	NA	None	None	NA
NOC2L	1.24223	0.000329344	0.00114631	None	ribosome biogenesis	3.48235
KLHL17	-7.5063	8.12342e-05	0.000328101	None	None	4.09026
PLEKHN1	-0.336865	0.52113	0.625923	None	None	0.283054
AL645608.7	-10.0987	0.0174411	0.038028	None	None	1.75843
HES4	0.0802979	0.884578	0.929287	None	None	0.0532637
ISG15	1.81698	0.0174447	0.0380314	None	None	1.75834
AGRN	1.35997	0.21906	0.31249	None	None	0.659436
RNF223	0.175734	0.89343	0.936176	None	None	0.0489396
C1orf159	0.0463341	0.874576	0.922162	None	None	0.0582025
AL390719.3	9.2987	9.17672e-14	2.25223e-12	None	None	13.0373
TTLL10-AS1	NA	NA	NA	None	None	NA
TTLL10	NA	NA	NA	None	None	NA
TNFRSF18	NA	NA	NA	None	None	NA
TNFRSF4	NA	NA	NA	None	None	NA
SDF4	0.629539	0.00190123	0.00548746	None	None	2.72096
B3GALT6	7.77798	2.46722e-06	1.3493e-05	None	None	5.60779
C1QTNF12	-4.99061	0.00348765	0.00938568	None	None	2.45747
AL162741.1	NA	NA	NA	None	None	NA
UBE2J2	-0.537344	0.0220337	0.0462237	None	None	1.65691
LINC01786	0	1	NA	None	None	0
SCNN1D	5.1283	0.127579	NA	None	None	0.894222
ACAP3	-1.23353	1.48317e-05	6.96053e-05	None	None	4.82881
PUSL1	0.823899	0.0185229	0.0400273	None	None	1.73229
INTS11	-1.28674	2.92211e-05	0.00012941	None	None	4.5343
AL139287.1	NA	NA	NA	None	None	NA
CPTP	3.61174	0.0161948	0.0357234	None	None	1.79062
TAS1R3	0	1	NA	None	None	0
DVL1	-0.454882	0.0956073	0.158177	None	None	1.01951
MXRA8	0.318392	0.816353	0.880219	None	None	0.088122
AURKAIP1	1.67284	4.17097e-08	3.19187e-07	None	None	7.37976
CCNL2	-0.940974	0.000480277	0.00161538	None	None	3.31851
MRPL20-AS1	1.93029	0.226405	0.321129	None	None	0.645113
MRPL20	-0.0195958	0.908334	0.946469	None	None	0.0417546
AL391244.2	-0.790176	0.696406	0.781502	None	None	0.157137
ANKRD65	-6.20213	0.0139277	0.0313195	None	None	1.85612
TMEM88B	NA	NA	NA	None	None	NA
LINC01770	0	1	1	None	None	0
VWA1	1.62403	5.46856e-08	4.08068e-07	None	None	7.26213
ATAD3C	0.828319	0.241177	0.338067	None	None	0.617664
ATAD3B	-0.757755	5.56767e-05	0.000232613	None	None	4.25433
ATAD3A	-0.633892	0.00366499	0.00980927	None	None	2.43593
TMEM240	-1.2617	0.730103	0.811015	None	None	0.136616
SSU72	0.847653	0.00022988	0.000828371	None	None	3.6385
AL645728.1	5.63457	6.5052e-09	5.83733e-08	None	None	8.18674
AL691432.2	-0.248282	0.752718	0.829127	None	None	0.123368
MIB2	-0.380619	0.218657	0.312053	None	None	0.660237
MMP23B	-1.37485	0.458717	0.566421	extracellular matrix organization	None	0.338455
CDK11B	-0.278035	0.445793	0.553741	None	None	0.350867
FO704657.1	-5.66204	NA	NA	None	None	NA
SLC35E2B	-0.694677	0.054238	0.098407	None	None	1.2657
CDK11A	1.06807	0.00329897	0.00894823	None	None	2.48162
SLC35E2A	-1.5923	0.00170946	0.00500167	None	None	2.76714
NADK	0.111325	0.636038	0.729023	None	None	0.196517
GNB1	-0.388974	0.0263725	0.053831	None	None	1.57885
AL109917.1	0	1	NA	None	None	0
CALML6	NA	NA	NA	None	None	NA
CFAP74	-0.0805823	0.891778	0.934803	None	None	0.0497433
PRKCZ	-0.460475	0.105434	0.171551	None	None	0.977018
AL590822.2	1.29595	0.15643	0.237863	None	None	0.805679
PRKCZ-AS1	5.16664	0.0163253	0.0359753	None	None	1.78714
FAAP20	0.899549	0.000562434	0.00186393	None	None	3.24993
AL590822.1	1.26697	0.530308	0.634366	None	None	0.275472
SKI	0.166649	0.396663	0.50531	None	None	0.401579
AL590822.3	0.680763	0.876002	NA	None	None	0.0574948
MORN1	-0.259343	0.203133	0.294322	None	None	0.692219
RER1	0.582427	0.00295891	0.00815029	None	None	2.52887
PEX10	0.44164	0.0181843	0.0394021	None	None	1.7403
PLCH2	-1.26162	0.774684	NA	None	None	0.110875
PANK4	0.0790147	0.667506	0.756907	None	None	0.175545
AL139246.5	3.34111	0.0150386	0.0334978	None	None	1.82279
TNFRSF14-AS1	0	1	NA	None	None	0
TNFRSF14	0	1	1	None	None	0
PRXL2B	NA	NA	NA	None	None	NA
TTC34	0	1	NA	None	None	0
PRDM16-DT	NA	NA	NA	None	None	NA
PRDM16	0	1	NA	None	None	0
ARHGEF16	-1.01425	0.0483389	0.0895157	None	None	1.3157
MEGF6	-4.49588	0.0057555	0.0145269	None	None	2.23992
AL513320.1	0	1	NA	None	None	0
TPRG1L	0.555308	0.0913931	0.152362	None	None	1.03909
WRAP73	1.42449	7.69705e-05	0.000312789	None	None	4.11368
TP73	7.71786	6.68171e-06	3.3663e-05	None	intrinsic apoptotic signaling pathway in response to DNA damage	5.17511
CCDC27	NA	NA	NA	None	None	NA
LRRC47	-0.226695	0.126885	0.200107	None	None	0.896588
CEP104	-1.26654	0.000153548	0.000578861	None	None	3.81375
DFFB	-1.10171	0.0577147	0.103647	None	None	1.23871
C1orf174	-0.773147	0.00345178	0.009299	None	None	2.46196
LINC01134	-1.11286	0.450769	0.558476	None	None	0.346046
LINC02780	NA	NA	NA	None	None	NA
AJAP1	-8.30588	0.0506874	0.0931186	cell-substrate adhesion	None	1.2951
NPHP4	-0.829915	0.46101	0.56852	None	None	0.33629
KCNAB2	-1.25067	0.544523	0.646853	None	None	0.263983
CHD5	-3.48208	0.37597	NA	None	None	0.424847
RPL22	1.66836	1.1878e-05	5.68135e-05	None	cytoplasmic translation	4.92526
RNF207	-0.747328	0.0325056	0.0641782	None	None	1.48804
ICMT	1.06397	8.80655e-07	5.25517e-06	None	None	6.05519
LINC00337	5.95777	4.79733e-10	5.53771e-09	None	None	9.319
GPR153	-2.90974	0.0615747	0.10935	None	None	1.2106
ACOT7	1.76231	1.69452e-07	1.1561e-06	None	carbohydrate derivative catabolic process	6.77095
AL031848.2	6.47524	0.00145084	0.00432413	None	None	2.83838
HES2	0.200067	0.479823	0.586736	None	None	0.318919
ESPN	1.12669	0.136082	0.212019	None	None	0.866199
TNFRSF25	-0.62116	0.15445	0.235392	None	None	0.811213
PLEKHG5	-0.334327	0.330192	0.436277	None	None	0.481233
NOL9	-0.251948	0.162769	0.245768	None	None	0.788428
TAS1R1	4.46978	0.187325	NA	None	None	0.727405
ZBTB48	0.220563	0.367872	0.475005	None	None	0.434303
KLHL21	0.125943	0.650022	0.741199	None	None	0.187072
PHF13	-0.355632	0.308821	0.413277	None	None	0.510293
THAP3	-0.329935	0.212038	0.304533	None	None	0.673586
DNAJC11	0.409436	0.0102868	0.0240468	None	None	1.98772
CAMTA1-DT	7.05409	2.33076e-08	1.8796e-07	None	None	7.6325
CAMTA1	0.312961	0.291149	0.393615	None	None	0.535885
VAMP3	-0.149939	0.412424	0.521063	None	None	0.384656
Z98884.2	NA	NA	NA	None	None	NA
PER3	-0.0756992	0.919888	0.954929	None	None	0.0362652
Z98884.1	-0.168915	0.965348	NA	None	None	0.015316
TNFRSF9	-0.299879	0.945753	NA	None	None	0.0242222
PARK7	1.05008	5.19336e-08	3.90417e-07	None	oxidative phosphorylation	7.28455
AL034417.4	0.802621	0.317731	0.423017	None	None	0.49794
AL034417.3	-2.22915	0.00758265	0.0185104	None	None	2.12018
ERRFI1	-0.900926	0.0708921	0.12288	None	None	1.1494
AL034417.2	-0.336105	0.64764	0.738966	None	None	0.188666
LINC01714	-0.20387	0.883594	0.928608	None	None	0.0537474
SLC45A1	2.2646	0.195129	0.284853	None	None	0.709679
RERE	-0.301005	0.0165688	0.0364115	None	None	1.78071
RERE-AS1	8.7363	5.89466e-12	1.0179e-10	None	None	11.2295
ENO1	1.53288	4.71128e-07	2.95862e-06	None	intrinsic apoptotic signaling pathway in response to DNA damage	6.32686
CA6	NA	NA	NA	None	None	NA
SLC2A7	0	1	NA	None	None	0
SLC2A5	-1.55511	0.0983777	0.161951	None	None	1.0071
GPR157	-0.705569	0.00386821	0.0102843	None	None	2.41249
MIR34AHG	2.45718	4.51535e-20	2.76764e-18	None	None	19.3453
LNCTAM34A	3.70134	0.00558845	0.0141556	None	None	2.25271
H6PD	-1.1681	0.0151158	0.0336345	None	None	1.82057
SPSB1	2.74587	4.25527e-09	3.95721e-08	None	None	8.37107
SLC25A33	0.221907	0.407954	0.516778	None	None	0.389388
TMEM201	2.5775	0.0494164	0.0911687	None	None	1.30613
PIK3CD	3.91678	2.18041e-06	1.20308e-05	None	None	5.66146
PIK3CD-AS2	5.51614	0.00195415	0.00562496	None	None	2.70904
CLSTN1	-0.0228365	0.917733	0.953725	None	None	0.0372835
CTNNBIP1	-0.110804	0.801	0.869136	None	None	0.0963673
LZIC	0.7694	4.1399e-08	3.17188e-07	None	None	7.38301
NMNAT1	-0.958313	3.57256e-06	1.89231e-05	None	None	5.44702
RBP7	0.295016	0.926918	NA	None	None	0.0329589
UBE4B	-0.220238	0.266066	0.36628	None	None	0.57501
KIF1B	0.569191	0.0196101	0.0419468	None	None	1.70752
AL139424.3	6.18831	NA	NA	None	None	NA
AL139424.2	-0.299908	0.939138	NA	None	None	0.0272708
PGD	1.2727	3.95877e-10	4.64236e-09	None	None	9.40244
CENPS	1.59283	0.366443	0.473734	None	None	0.435994
DFFA	0.470836	0.0215768	0.0454133	None	None	1.66601
PEX14	0.0715529	0.734208	0.814424	None	None	0.134181
CASZ1	1.17578	0.166251	0.250198	None	None	0.779236
AL139423.1	NA	NA	NA	None	None	NA
C1orf127	-0.299861	0.945757	NA	None	None	0.0242206
TARDBP	1.41829	NA	NA	None	None	NA
AL109811.2	0.477023	NA	NA	None	None	NA
SRM	1.91991	5.50381e-05	0.000229995	None	None	4.25934
EXOSC10	0.09462	0.662381	0.752183	None	None	0.178892
AL109811.1	2.38122	2.27171e-09	2.24984e-08	None	None	8.64365
EXOSC10-AS1	NA	NA	NA	None	None	NA
MTOR	-0.466301	0.00229205	0.00646946	None	None	2.63978
ANGPTL7	6.04314	0.0333501	0.0655756	None	None	1.4769
UBIAD1	1.01896	4.32503e-05	0.000185131	None	None	4.36401
AL031731.1	NA	NA	NA	None	None	NA
FBXO44	5.91981	0.0185442	0.0400688	None	carbohydrate derivative catabolic process	1.73179
FBXO6	5.75704	NA	NA	None	carbohydrate derivative catabolic process	NA
MAD2L2	-1.29275	0.515447	0.620613	mesenchyme development	None	0.287816
DRAXIN	0	1	NA	None	None	0
AGTRAP	1.4618	0.0294913	0.0591893	None	None	1.53031
C1orf167	0	1	NA	None	None	0
MTHFR	0.339103	0.0405667	0.0773093	None	None	1.39183
CLCN6	1.00855	1.40965e-08	1.18771e-07	None	None	7.85089
NPPA	8.42553	7.84973e-10	8.62526e-09	None	None	9.10515
AL021155.5	2.75602	0.0418376	0.0792589	None	None	1.37843
KIAA2013	1.08067	4.82669e-07	3.02121e-06	None	None	6.31635
PLOD1	0.283526	0.327429	0.433342	None	None	0.484883
AL096840.2	0	1	NA	None	None	0
MFN2	-0.810665	0.00467935	0.0121543	None	None	2.32981
MIIP	0.182971	0.431525	0.54011	None	None	0.364994
TNFRSF8	6.30362	1.67739e-08	1.3883e-07	None	None	7.77537
TNFRSF1B	1.82342	7.19647e-06	3.60011e-05	None	intrinsic apoptotic signaling pathway in response to DNA damage	5.14288
VPS13D	-0.195667	0.16009	0.242501	None	None	0.795635
DHRS3	-3.45263	7.66108e-10	8.44215e-09	None	None	9.11571
AC254633.1	NA	NA	NA	None	None	NA
AADACL4	NA	NA	NA	None	None	NA
AADACL3	-3.79979	0.379468	NA	None	None	0.420825
C1orf158	-3.79978	0.379469	NA	None	None	0.420823
HNRNPCL3	NA	NA	NA	None	None	NA
LRRC38	0	1	NA	None	None	0
PDPN	-3.77014	0.0929624	0.154492	cell-substrate adhesion	None	1.03169
PRDM2	0.432278	0.00199983	0.00573532	None	None	2.69901
KAZN	1.15208	1.72248e-05	7.97437e-05	None	None	4.76385
AL357873.1	10.1407	1.51847e-14	4.20372e-13	None	None	13.8186
KAZN-AS1	9.33521	5.69128e-12	9.8812e-11	None	None	11.2448
TMEM51-AS1	3.77196	0.0346672	0.0678256	None	None	1.46008
TMEM51	0.547206	0.258172	0.357207	None	None	0.588091
C1orf195	3.60343	0.0182949	0.0396203	None	None	1.73767
FHAD1	5.31442	4.19233e-05	0.000180134	None	None	4.37754
AL031283.2	0	1	NA	None	None	0
AL031283.1	-3.64667	0.35522	NA	None	None	0.449503
EFHD2	-0.484823	0.266469	0.366712	None	None	0.574353
CTRC	-0.382157	0.892291	0.935238	None	None	0.0494936
CELA2A	0	NA	NA	None	None	NA
CELA2B	-1.25544	0.168923	0.253359	None	None	0.772312
CASP9	-1.02843	0.000394144	0.0013515	None	None	3.40434
DNAJC16	-0.639739	7.37935e-05	0.000300324	None	None	4.13198
AGMAT	7.91108	6.82615e-10	7.60068e-09	None	None	9.16582
AL121992.1	2.61061	0.304219	0.407972	None	None	0.516813
DDI2	-0.821377	6.74256e-06	3.39517e-05	None	None	5.17118
PLEKHM2	-2.00163	2.92484e-12	5.38512e-11	None	None	11.5339
AL450998.3	-0.727965	0.286033	0.388231	None	None	0.543584
SLC25A34	-8.19062	1.90031e-32	4.67403e-30	None	None	31.7212
SLC25A34-AS1	-7.37112	0.0268306	0.0545996	None	None	1.57137
TMEM82	-6.69912	0.115597	NA	None	None	0.937055
FBLIM1	-1.29708	0.000262651	0.000932451	None	None	3.58062
UQCRHL	0	1	NA	None	None	0
AL450998.2	0.979089	0.000931303	0.00291897	None	None	3.03091
SPEN	0.0219946	0.9208	0.955524	None	None	0.0358348
ZBTB17	0.67195	0.000681404	0.00221197	None	None	3.1666
HSPB7	-7.67179	1.15289e-05	5.52953e-05	None	None	4.93821
CLCNKA	-10.2709	9.41967e-07	5.59493e-06	None	None	6.02596
EPHA2	2.1388	0.00220873	0.0062647	None	intrinsic apoptotic signaling pathway in response to DNA damage	2.65586
AL451042.1	0.480863	0.912572	NA	None	None	0.0397329
ARHGEF19	-2.31205	0.580493	NA	None	None	0.236203
AL109627.1	0	1	NA	None	None	0
CPLANE2	-2.22344	0.613922	NA	mesenchyme development	None	0.211887
FBXO42	-0.0675075	0.749008	0.826178	None	None	0.125514
SZRD1	0.541071	0.00125187	0.00379117	None	None	2.90244
SPATA21	2.7849	0.00263923	0.00735633	None	None	2.57852
NECAP2	0.191038	0.199549	0.29007	None	None	0.69995
LINC01772	-0.0944271	0.921374	0.9558	None	None	0.0355638
NBPF1	-0.457622	0.0690132	0.120136	None	None	1.16107
CROCC	0.788187	0.0818154	0.138562	None	None	1.08717
BX284668.5	-1.0575	0.633534	0.726599	None	None	0.19823
BX284668.6	5.25613	0.0372319	0.0719618	None	None	1.42909
MFAP2	-0.04173	0.966914	0.985039	None	None	0.0146121
AL049569.1	3.56735	2.63826e-23	2.56929e-21	None	None	22.5787
ATP13A2	1.59714	1.62509e-15	5.3113e-14	None	None	14.7891
SDHB	0.29012	0.0717322	0.124193	None	None	1.14429
PADI2	-1.79629	0.0476761	0.0884419	None	None	1.3217
PADI1	-1.49539	0.00771568	0.0187825	None	None	2.11263
PADI3	-0.299902	0.936065	NA	None	None	0.028694
PADI4	0	1	NA	None	None	0
RCC2	0.181717	0.483142	0.589534	None	None	0.315925
ARHGEF10L	0.95347	0.0351299	0.0685623	None	None	1.45432
LINC02810	NA	NA	NA	None	None	NA
IGSF21	0	1	NA	None	None	0
PAX7	NA	NA	NA	None	None	NA
ALDH4A1	1.57066	0.309613	0.414076	None	None	0.509181
IFFO2	1.91638	3.09545e-09	2.97675e-08	None	None	8.50928
AL137127.1	-0.299861	0.945757	NA	None	None	0.0242206
UBR4	0.23259	0.157076	0.238674	None	None	0.80389
EMC1-AS1	1.62353	NA	NA	None	None	NA
EMC1	1.30337	2.28177e-13	5.27419e-12	None	None	12.6417
MRTO4	1.25511	9.4497e-18	4.16765e-16	None	ribosome biogenesis	17.0246
AKR7A3	-2.22345	0.61392	NA	None	None	0.211888
AKR7A2	1.36723	0.0503875	0.0927007	None	None	1.29768
SLC66A1	2.20706	NA	NA	None	None	NA
CAPZB	0.0329593	0.736156	0.816131	None	None	0.13303
MICOS10	2.88997	NA	NA	None	None	NA
NBL1	2.88675	0.161906	0.244657	None	None	0.790737
TMCO4	-0.906129	0.0238354	0.0494199	None	None	1.62278
OTUD3	1.16025	1.77127e-08	1.45782e-07	None	None	7.75171
PLA2G2A	-10.1866	2.63421e-09	2.57975e-08	None	None	8.57935
PLA2G5	-9.92022	6.59015e-12	1.12886e-10	None	None	11.1811
PLA2G2F	-1.04852	0.286912	0.389087	None	None	0.542251
UBXN10	0	1	NA	None	None	0
VWA5B1	-7.28828	0.0382799	0.0736906	None	None	1.41703
LINC01141	-0.383837	0.928908	NA	None	None	0.0320271
CAMK2N1	-0.382141	0.730465	0.811322	None	None	0.136401
MUL1	1.11841	6.94958e-06	3.48943e-05	None	None	5.15804
CDA	2.21782	0.00200477	0.00574654	None	carbohydrate derivative catabolic process	2.69793
PINK1	0.184667	0.499391	0.605423	None	None	0.301559
PINK1-AS	1.39964	0.140785	0.21796	None	None	0.851443
DDOST	1.84066	5.23062e-09	4.77173e-08	None	None	8.28145
KIF17	-0.573772	0.201395	0.292288	None	None	0.695952
SH2D5	-2.00825	2.74775e-06	1.4904e-05	None	None	5.56102
HP1BP3	-1.08117	1.83266e-09	1.85735e-08	None	None	8.73692
EIF4G3	1.16	4.3959e-08	3.34399e-07	None	None	7.35695
ECE1	0.686349	0.14085	0.218043	None	None	0.851243
NBPF3	-1.216	6.14942e-10	6.88714e-09	None	None	9.21117
ALPL	-0.724376	0.4802	0.587078	None	None	0.318578
RAP1GAP	-2.21995	5.04075e-30	1.06271e-27	None	None	29.2975
USP48	0.0553319	0.700716	0.785374	None	None	0.154458
LDLRAD2	-6.2253	0.144054	NA	None	None	0.841473
HSPG2	-2.6678	7.04586e-14	1.76238e-12	None	None	13.1521
CELA3A	NA	NA	NA	None	None	NA
LINC00339	0.985366	0.490224	0.596761	None	None	0.309605
CDC42	0.329943	0.000485252	0.00163068	None	None	3.31403
CDC42-AS1	6.80626	6.6096e-08	4.8603e-07	None	None	7.17982
CDC42-IT1	1.83786	NA	NA	None	None	NA
WNT4	4.89435	5.54373e-08	4.13516e-07	None	None	7.2562
AL445253.1	2.65103	0.167506	0.251693	None	None	0.775969
ZBTB40	0.576093	0.0155905	0.0345424	None	None	1.80714
ZBTB40-IT1	NA	NA	NA	None	None	NA
C1QA	-2.22345	0.360119	0.467195	None	None	0.443554
C1QC	0	1	1	None	None	0
C1QB	0	1	1	None	None	0
EPHB2	-3.23641	7.74618e-07	4.67475e-06	None	None	6.11091
KDM1A	0.0128745	0.948268	0.971356	None	None	0.0230689
AL031428.1	0.800174	0.0105686	0.0246275	None	None	1.97598
LUZP1	-0.615334	0.0341197	0.0669174	None	None	1.467
LINC01355	-0.485096	0.00683007	0.0169077	None	None	2.16557
AL109936.6	1.84084	0.0100486	0.0235561	None	None	1.99789
HNRNPR	0.0713718	0.63871	0.731037	None	None	0.194696
ZNF436	1.43981	6.71611e-07	4.09433e-06	None	None	6.17288
ZNF436-AS1	0.311225	0.266707	0.366978	None	None	0.573966
TCEA3	-0.524774	0.590549	0.688818	None	None	0.228744
ASAP3	-1.59017	0.000143244	0.000544834	None	None	3.84392
E2F2	-0.374294	0.557371	0.658649	None	None	0.253855
ID3	2.95462	2.53161e-08	2.02518e-07	None	None	7.5966
AL450043.1	9.2495	3.61339e-10	4.27392e-09	None	None	9.44208
MDS2	3.43693	0.000130642	0.000502178	None	None	3.88392
RPL11	2.67523	2.06084e-06	1.14203e-05	None	ribosome biogenesis	5.68596
ELOA-AS1	1.88077	5.93398e-18	2.69771e-16	None	None	17.2267
ELOA	0.50503	0.00176785	0.00514507	None	None	2.75255
PITHD1	0.350515	0.159302	0.241522	None	None	0.797778
LYPLA2	-0.175656	0.467361	0.574733	None	None	0.330347
GALE	-0.752273	0.0526138	0.0959502	None	None	1.2789
HMGCL	-0.366016	0.061352	0.109015	None	None	1.21217
FUCA1	-0.561566	0.0534057	0.0971912	None	None	1.27241
CNR2	-1.26168	NA	NA	None	None	NA
PNRC2	0.914781	1.73994e-08	1.43449e-07	None	None	7.75947
SRSF10	0.414221	0.00196613	0.00565605	None	None	2.70639
AL591178.1	0.585635	0.893405	NA	None	None	0.0489515
MYOM3	0	1	NA	None	None	0
IFNLR1	-0.925257	0.029702	0.059556	None	None	1.52721
AL138902.1	0.0135176	0.993179	1	None	None	0.00297226
GRHL3	1.07827	0.168062	0.25237	None	None	0.77453
STPG1	1.34994	3.16063e-07	2.04784e-06	None	None	6.50023
NIPAL3	1.87867	9.72949e-08	6.91847e-07	None	None	7.01191
RCAN3AS	7.09256	7.71398e-16	2.65696e-14	None	None	15.1127
RCAN3	1.75699	1.86181e-19	1.0264e-17	None	None	18.7301
NCMAP-DT	-1.55886	0.433521	0.54193	None	None	0.36299
NCMAP	-1.10872	0.00947301	0.0224013	None	None	2.02351
SRRM1	0.0393352	0.885458	0.930097	None	None	0.0528318
AL445648.1	4.9162	0.00428211	0.0112482	None	None	2.36834
CLIC4	0.133303	0.381743	0.489719	None	None	0.418229
RUNX3	6.53694	0.000784162	0.00250444	None	None	3.10559
AL050344.1	0	1	NA	None	None	0
SYF2	1.1276	3.14386e-09	3.01591e-08	None	None	8.50254
AL031432.4	0.708264	0.661391	0.751349	None	None	0.179542
AL031432.5	0	1	NA	None	None	0
RSRP1	-1.84449	2.86455e-15	8.95055e-14	None	None	14.5429
AL031432.3	0	1	NA	None	None	0
RHD	-0.0763073	0.920656	0.955469	None	None	0.0359024
TMEM50A	0.27913	0.0815158	0.13814	None	None	1.08876
RHCE	0.0196471	0.955242	0.976817	None	None	0.0198868
MACO1	-0.721011	0.000137253	0.000524752	None	None	3.86248
LDLRAP1	-0.347987	0.067108	0.117453	None	None	1.17323
AL606491.1	-5.71308	0.000833135	0.00264035	None	None	3.07928
MAN1C1	-2.48473	2.21595e-18	1.05754e-16	None	None	17.6544
AL031280.1	-0.0720494	0.903385	0.943259	None	None	0.0441272
SELENON	1.44003	0.0230642	0.0480702	None	None	1.63706
AL020996.1	0.870492	0.618309	0.71353	None	None	0.208795
MTFR1L	-1.56306	5.133e-37	2.0516e-34	None	None	36.2896
AUNIP	0.451169	0.226185	0.320888	None	None	0.645536
AL033528.2	-0.411508	0.69594	0.78107	None	None	0.157428
PAQR7	-2.5486	6.74417e-23	6.3425e-21	None	None	22.1711
STMN1	-0.473922	0.325501	0.431326	None	None	0.487447
PAFAH2	-2.2907	1.13555e-23	1.18658e-21	None	None	22.9448
EXTL1	-1.742	0.0413209	0.0784503	None	None	1.38383
SLC30A2	-0.874217	0.000230441	0.000830235	None	None	3.63744
AL391650.2	-0.625855	0.707205	0.791305	None	None	0.150455
TRIM63	-0.100478	0.952659	0.974812	None	None	0.0210627
PDIK1L	-0.382063	0.198952	0.289346	None	None	0.701251
FAM110D	NA	NA	NA	None	None	NA
ZNF593	1.88753	0.0315655	0.0626665	None	ribosome biogenesis	1.50079
CNKSR1	0.0121187	0.956166	0.977359	None	None	0.0194666
CATSPER4	-3.47731	0.423254	0.532049	None	None	0.373399
CEP85	0.938682	0.000303211	0.00106287	None	None	3.51826
SH3BGRL3	-0.213051	0.603795	0.700902	None	None	0.21911
UBXN11	1.25039	0.000731233	0.00235466	None	None	3.13594
CD52	9.06207	1.96576e-13	4.60477e-12	None	None	12.7065
CRYBG2	0.269742	0.369252	0.476439	None	None	0.432677
ZNF683	0	1	NA	None	None	0
LIN28A	NA	NA	NA	None	None	NA
DHDDS	0.225572	0.144056	0.222195	None	None	0.841467
AL513365.2	-0.0155442	0.932907	0.962485	None	None	0.0301615
HMGN2	-0.179657	0.30038	0.403767	None	None	0.52233
RPS6KA1	-0.104042	0.805034	0.871738	None	None	0.0941858
AL512408.1	0	1	NA	None	None	0
ARID1A	-0.12851	0.168948	0.253359	None	None	0.772248
PIGV	0.7129	0.0484438	0.0896753	None	None	1.31476
ZDHHC18	-0.770857	0.000185497	0.000685036	None	None	3.73166
SFN	6.38294	3.29445e-14	8.63443e-13	None	intrinsic apoptotic signaling pathway in response to DNA damage	13.4822
GPN2	0.158831	0.378907	0.486894	None	None	0.421467
GPATCH3	0.989186	0.00100241	0.00311087	None	None	2.99896
NUDC	0.437695	6.13627e-05	0.000254203	None	None	4.2121
KDF1	0.141751	0.59903	0.696931	None	None	0.222552
TRNP1	2.78064	0.110366	0.178215	None	None	0.957165
TENT5B	10.0931	1.14993e-14	3.27808e-13	None	None	13.9393
SLC9A1	0.786812	2.78066e-09	2.70249e-08	None	None	8.55585
WDTC1	-1.03269	0.000105925	0.00041643	None	None	3.975
TMEM222	0.910521	4.71427e-08	3.56076e-07	None	None	7.32659
SYTL1	0.411123	0.556377	0.657717	None	None	0.254631
MAP3K6	-4.03435	0.00705048	0.0173771	None	None	2.15178
FCN3	NA	NA	NA	None	None	NA
WASF2	-0.483241	2.62502e-05	0.000117583	None	None	4.58087
FO393419.2	7.83485	1.71706e-09	1.74665e-08	None	None	8.76521
AHDC1	-1.54954	5.43561e-05	0.000227294	None	None	4.26475
FGR	-2.22344	0.613921	NA	None	None	0.211888
IFI6	2.13243	0.000113472	0.000442653	None	intrinsic apoptotic signaling pathway in response to DNA damage	3.94511
AL445490.1	7.27689	1.99321e-08	1.62515e-07	None	None	7.70045
FAM76A	0.102114	0.645322	0.736978	None	None	0.190224
STX12	0.345003	0.00553097	0.0140304	None	None	2.2572
AL020997.3	NA	NA	NA	None	None	NA
AL020997.4	1.88694	0.409051	0.517758	None	None	0.388222
PPP1R8	0.0615737	0.737751	0.817391	None	None	0.13209
THEMIS2	-1.78128	0.317639	0.422954	None	None	0.498067
RPA2	-1.20699	6.20109e-14	1.5695e-12	None	None	13.2075
SMPDL3B	0.818478	0.519992	0.624864	None	None	0.284003
AL512288.1	6.60932	0.00156847	0.00462797	None	None	2.80452
XKR8	1.10882	0.397451	0.506113	None	None	0.400717
EYA3	0.321009	0.0168481	0.0369321	None	None	1.77345
PTAFR	0.553623	0.249738	0.347366	None	None	0.602516
DNAJC8	0.325852	0.00189443	0.00547112	None	None	2.72252
ATP5IF1	0.933292	1.85505e-06	1.0391e-05	None	None	5.73164
AL353622.1	-0.442412	0.605978	0.702968	None	None	0.217543
SESN2	0.421089	0.0504622	0.0927937	None	None	1.29703
MED18	0.527353	0.0415995	0.0788935	None	None	1.38091
PHACTR4	-0.398347	0.107933	0.17492	None	None	0.966847
RCC1	0.667599	0.0347811	0.0680131	None	None	1.45866
SNHG3	2.55763	0.196745	0.286776	None	None	0.706097
TRNAU1AP	-0.562295	0.00109412	0.00336119	None	None	2.96094
SNHG12	0.845325	0.00134293	0.00403257	None	None	2.87195
TAF12	0.247762	0.067508	0.118008	None	None	1.17064
RAB42	0	1	NA	None	None	0
LINC01715	6.96917	1.49153e-05	6.99292e-05	None	None	4.82637
AL360012.1	0.370546	0.882498	0.927925	None	None	0.0542865
GMEB1	-0.657194	0.000510264	0.00170696	None	None	3.29221
YTHDF2	0.38971	0.00584158	0.0147094	None	None	2.23347
OPRD1	1.17204	0.509026	NA	None	None	0.29326
EPB41	-0.771087	0.000171589	0.000639583	None	None	3.76551
TMEM200B	0	1	NA	None	None	0
AL357500.1	-6.56454	0.00336629	0.00911534	None	None	2.47285
SRSF4	-0.170158	0.0523668	0.0955672	None	None	1.28094
MECR	-0.573645	0.00458462	0.0119497	None	None	2.3387
PTPRU	-1.43865	0.000492439	0.00165281	None	None	3.30765
LINC01756	0.678691	0.862803	0.913826	None	None	0.0640886
MATN1-AS1	2.93993	0.0918488	0.152962	None	None	1.03693
LAPTM5	-2.22345	0.405797	0.514792	None	None	0.391692
SDC3	1.96924	0.000649096	0.00211856	None	None	3.18769
PUM1	0.254372	0.0703204	0.122034	None	None	1.15292
NKAIN1	3.28964	NA	NA	None	None	NA
SNRNP40	0.243938	0.111002	0.178971	None	None	0.954669
ZCCHC17	-0.216021	0.2844	0.38639	None	None	0.54607
AL451070.1	1.50085	0.000253049	0.000902368	None	None	3.5968
FABP3	6.65645	0.00094025	0.00294173	None	None	3.02676
SERINC2	-0.134855	0.752342	0.828807	None	None	0.123585
LINC01226	1.92216	0.228883	0.323877	None	None	0.640386
AC114488.1	6.09774	0.0600427	0.107087	None	None	1.22154
TINAGL1	1.32616	0.000240339	0.000861367	None	None	3.61918
HCRTR1	5.7517	0.0222819	0.0466424	None	None	1.65205
PEF1	-0.530043	0.00178804	0.00519965	None	None	2.74762
AC114488.2	-2.59907	0.473681	NA	None	None	0.324514
AC114488.3	NA	NA	NA	None	None	NA
COL16A1	-5.56741	0.00111738	0.00342717	cell-substrate adhesion	None	2.9518
ADGRB2	-2.23645	0.232133	0.327679	None	None	0.634262
SPOCD1	3.39006	0.0301005	0.0602418	None	None	1.52143
AL354919.1	-0.299861	0.945757	NA	None	None	0.0242206
AL136115.2	0.198678	0.576265	0.675153	None	None	0.239378
PTP4A2	0.893565	7.03493e-06	3.52666e-05	None	None	5.15274
KHDRBS1	-0.371654	2.62984e-05	0.000117772	None	None	4.58007
AL445248.1	2.73021	0.0076158	0.0185795	None	None	2.11828
TMEM39B	0.125119	0.440552	0.548617	None	None	0.356002
KPNA6	0.146376	0.293817	0.396476	None	None	0.531923
TXLNA	0.929071	3.61976e-09	3.41925e-08	None	None	8.44132
CCDC28B	4.96346	0.00120626	0.00366926	None	None	2.91856
AL049795.1	-2.9137	0.506438	NA	None	None	0.295474
IQCC	-2.89262	0.142341	0.220049	None	None	0.84667
DCDC2B	6.01788	1.65363e-05	7.67972e-05	None	None	4.78156
TMEM234	-0.372274	0.102215	0.167096	None	None	0.990484
EIF3I	0.979968	6.36762e-06	3.22296e-05	None	None	5.19602
FAM167B	-3.01177	0.491498	NA	None	None	0.308478
LCK	0	1	NA	None	None	0
HDAC1	-0.0165226	0.888049	0.932065	None	None	0.0515631
MARCKSL1	0.628438	0.62273	0.717198	None	None	0.2057
TSSK3	-1.71623	0.18583	0.273611	None	None	0.730884
FAM229A	0.676425	0.415795	0.524356	None	None	0.381121
BSDC1	-0.2626	0.0246003	0.0507426	None	None	1.60906
ZBTB8B	2.6841	0.174419	0.259942	None	None	0.758405
ZBTB8A	1.84232	NA	NA	None	None	NA
ZBTB8OS	-0.330011	0.000335749	0.00116653	None	None	3.47399
RBBP4	-0.411716	0.000157519	0.000591391	None	None	3.80267
SYNC	1.83812	5.84547e-08	4.33495e-07	None	None	7.23318
KIAA1522	0.181287	0.680166	0.767451	None	None	0.167385
YARS	0.834168	0.000141638	0.000539151	None	None	3.84882
S100PBP	-1.45758	9.46163e-09	8.29622e-08	None	None	8.02403
FNDC5	-0.60138	0.81983	0.882975	None	None	0.0862764
HPCA	-2.22339	0.61393	NA	None	None	0.211881
TMEM54	0.363591	0.351447	0.458082	None	None	0.45414
AL031602.2	8.44765	1.33688e-05	6.32818e-05	None	None	4.87391
RNF19B	-0.039393	0.860688	0.912484	None	None	0.0651541
AL020995.1	3.14345	1.3245e-19	7.49574e-18	None	None	18.8779
AK2	0.662747	0.000782146	0.00249883	None	None	3.10671
AZIN2	0.430642	0.507475	0.61317	None	None	0.294585
TRIM62	-2.07952	1.60418e-08	1.33231e-07	mesenchyme development	None	7.79475
AL662907.3	-3.47726	0.423261	NA	None	None	0.373392
ZNF362	-0.814374	0.00553496	0.0140386	None	None	2.25689
AL513327.3	0	1	1	None	None	0
A3GALT2	-1.26165	0.739976	NA	None	None	0.130782
AL513327.1	2.49809	6.39532e-05	0.000263519	None	None	4.19414
PHC2	1.18804	5.63709e-12	9.80486e-11	None	None	11.2489
AL513327.2	2.18893	3.19949e-10	3.82682e-09	None	None	9.49492
ZSCAN20	1.72802	5.06443e-05	0.0002134	None	None	4.29547
CSMD2	-3.65102	0.18101	0.267892	None	None	0.742296
SMIM12	0.0377828	0.823341	0.885614	None	None	0.0844201
GJB5	0.98696	0.820143	NA	None	None	0.0861104
GJB4	-0.299912	0.945747	NA	None	None	0.0242249
GJB3	0.680712	0.876011	NA	None	None	0.0574903
GJA4	NA	NA	NA	None	None	NA
DLGAP3	0	1	NA	None	None	0
TMEM35B	6.11593	0.000839042	0.00265671	None	None	3.07622
ZMYM6	1.38777	0.39569	0.504205	None	None	0.402645
ZMYM1	0.00378888	0.980627	0.995309	None	None	0.00849616
AL590434.1	1.76529	0.658336	NA	None	None	0.181552
SFPQ	0.0497401	0.709823	0.793451	None	None	0.14885
ZMYM4	-0.394773	0.0219539	0.0460817	None	None	1.65849
ZMYM4-AS1	1.87054	2.41003e-06	1.32028e-05	None	None	5.61798
KIAA0319L	-0.692641	0.00190037	0.00548579	None	None	2.72116
NCDN	1.02973	0.172755	0.258044	None	None	0.762569
AC004865.2	-0.386062	0.835057	0.893855	None	None	0.0782837
TFAP2E	1.62974	0.084781	0.142778	None	None	1.0717
PSMB2	0.230152	0.146969	0.225784	None	None	0.832775
C1orf216	4.20949	0.0926652	0.154107	None	None	1.03308
CLSPN	0.271892	0.521656	0.626477	None	None	0.282616
AGO4	-0.796579	0.00298362	0.00820773	None	None	2.52526
AGO1	2.6596	0.00346002	0.0093191	None	None	2.46092
AGO3	0.40247	0.0789597	0.134629	None	None	1.10259
AL138787.2	2.11659	2.19493e-05	9.98332e-05	None	None	4.65858
ADPRHL2	1.03063	0.000176413	0.0006554	None	None	3.75347
COL8A2	2.0424	0.504257	0.610076	None	None	0.297348
TRAPPC3	0.176844	0.347635	0.454163	None	None	0.458876
MAP7D1	0.492118	0.0364509	0.0707518	None	None	1.43829
THRAP3	0.18068	0.257973	0.356992	None	None	0.588426
SH3D21	1.54421	2.68184e-10	3.24818e-09	None	None	9.57157
EVA1B	2.27754	3.97259e-09	3.71776e-08	None	None	8.40093
AL591845.1	-1.63061	0.183006	0.270407	None	None	0.737535
STK40	0.818068	0.000828533	0.0026285	None	None	3.08169
LSM10	1.06016	0.00184999	0.00535487	None	None	2.73283
OSCP1	1.33262	4.00931e-08	3.08786e-07	None	None	7.39693
MRPS15	1.38668	8.79197e-07	5.24973e-06	None	None	6.05591
CSF3R	-1.66019	7.39463e-07	4.48092e-06	None	None	6.13108
GRIK3	2.03005	0.636298	NA	None	None	0.19634
AL353604.1	-3.88732	0.368093	NA	None	None	0.434042
LINC01137	-0.171596	0.720861	0.803167	None	None	0.142148
ZC3H12A	2.29615	0.0118688	0.0272297	None	None	1.92559
MEAF6	-0.12604	0.624801	0.719102	None	None	0.204258
SNIP1	0.762563	0.000156283	0.000587554	None	None	3.80609
DNALI1	5.8631	0.0169191	0.0370667	None	None	1.77162
GNL2	1.24156	3.71611e-07	2.37408e-06	None	ribosome biogenesis	6.42991
RSPO1	-0.299861	0.945757	NA	None	None	0.0242206
C1orf109	0.997456	6.99491e-07	4.25483e-06	None	None	6.15522
CDCA8	-0.959985	0.105883	0.172211	None	None	0.975173
EPHA10	2.09253	0.625794	NA	None	None	0.203568
MANEAL	2.96634	0.119473	0.190171	None	None	0.922729
YRDC	1.38552	3.01329e-07	1.96299e-06	None	None	6.52096
C1orf122	1.40222	0.0523742	0.0955678	None	None	1.28088
MTF1	-0.199396	0.247388	0.344747	None	None	0.606622
INPP5B	-1.40836	8.49021e-08	6.13733e-07	None	None	7.07108
SF3A3	-0.31667	0.0430239	0.0810819	None	None	1.36629
FHL3	0.211635	0.81062	0.875806	None	None	0.0911829
UTP11	0.224558	0.348768	0.455178	None	None	0.457463
MIR3659HG	2.32984	0.309352	NA	None	None	0.509547
AL354702.2	-0.299897	0.94575	NA	None	None	0.0242236
RRAGC	-0.170452	0.270012	0.370462	None	None	0.568617
AL139260.1	-0.512169	0.000205299	0.000746555	None	None	3.68761
MYCBP	1.80509	0.00199186	0.00571551	None	None	2.70074
GJA9	8.56613	3.7972e-12	6.84032e-11	None	None	11.4205
RHBDL2	1.77255	0.018642	0.0402394	None	None	1.72951
AKIRIN1	-0.0146317	0.947516	0.970689	None	None	0.0234137
NDUFS5	1.83861	4.82997e-05	0.000204464	None	oxidative phosphorylation	4.31606
MACF1	-0.137061	0.379552	0.487494	None	None	0.420729
AL442071.2	2.91291	0.0819999	0.138813	None	None	1.08619
BMP8A	7.94053	1.86766e-10	2.35421e-09	None	None	9.7287
PABPC4	1.35771	2.23682e-13	5.18278e-12	None	None	12.6504
HEYL	-3.27526	0.190843	NA	mesenchyme development	None	0.719324
PPIE	-0.285033	0.540214	0.643571	None	None	0.267434
BMP8B	0.494688	0.871361	NA	None	None	0.0598017
OXCT2	NA	NA	NA	None	None	NA
AL033527.4	-3.0206	0.378887	NA	None	None	0.421491
LINC02811	0	1	NA	None	None	0
TRIT1	-0.605743	0.0043788	0.0114748	None	None	2.35864
MYCL	6.2	0.000748471	0.00240567	None	None	3.12582
MFSD2A	0.0495479	0.919514	0.954748	None	None	0.0364415
CAP1	0.829247	1.56119e-09	1.60597e-08	None	None	8.80654
PPT1	1.91518	1.70698e-25	2.16877e-23	None	None	24.7678
RLF	-0.0905635	0.410982	0.519756	None	None	0.386177
TMCO2	0	1	NA	None	None	0
AL050341.2	0.615965	0.624726	0.71907	None	None	0.20431
ZMPSTE24	0.512735	0.007804	0.0189783	None	None	2.10768
COL9A2	-0.0528631	NA	NA	None	None	NA
SMAP2	-0.209934	0.473043	0.580298	None	None	0.325099
ZFP69B	0.882615	0.837339	NA	None	None	0.0770985
ZFP69	0.917331	0.526438	0.630916	None	None	0.278653
AL603839.3	-0.398895	0.322037	0.427514	None	None	0.492094
EXO5	-0.914142	0.510613	0.616069	None	None	0.291908
ZNF684	-0.279038	0.433544	0.54193	None	None	0.362967
RIMS3	1.70618	0.663426	NA	None	None	0.178208
AL031289.2	NA	NA	NA	None	None	NA
AL031289.1	1.2573	0.694407	NA	None	None	0.158386
NFYC-AS1	7.63725	3.44511e-10	4.0976e-09	None	None	9.4628
NFYC	-0.0107337	0.957461	0.978317	None	None	0.018879
KCNQ4	-0.812614	0.543406	0.646081	None	None	0.264875
CITED4	6.00584	1.49093e-07	1.02632e-06	None	None	6.82654
AC119677.1	0	1	NA	None	None	0
CTPS1	0.866292	0.0513548	0.0941553	None	None	1.28942
SLFNL1-AS1	0.420333	0.240092	0.336733	None	None	0.619622
SLFNL1	3.19913	0.0497845	0.0917323	None	None	1.30291
SCMH1	-3.34279	7.29094e-26	9.64666e-24	None	None	25.1372
AC093151.8	-5.36907	NA	NA	None	None	NA
FOXO6	0.568187	0.131709	0.206222	None	None	0.880385
AC093151.2	1.55059	0.719075	0.801642	None	None	0.143226
HIVEP3	-0.196492	0.707796	0.791875	None	None	0.150092
GUCA2B	NA	NA	NA	None	None	NA
GUCA2A	0	1	NA	None	None	0
FOXJ3	-0.863643	1.2022e-05	5.74451e-05	None	None	4.92002
RIMKLA	-0.532597	0.620495	0.715296	None	None	0.207262
ZMYND12	-3.64605	0.399976	NA	None	None	0.397966
PPCS	0.0190274	0.888961	0.932698	None	None	0.0511173
CCDC30	0.405383	0.109623	0.177195	None	None	0.960097
PPIH	-0.239652	0.0725907	0.125351	None	None	1.13912
AC098484.4	1.78554	NA	NA	None	None	NA
YBX1	0.133668	0.604666	0.701573	None	None	0.218485
CLDN19	-4.994	0.00229521	0.00647742	None	None	2.63918
P3H1	-1.18826	5.70522e-05	0.000237842	None	None	4.24373
C1orf50	1.69299	NA	NA	None	None	NA
TMEM269	3.88024	1.05777e-05	5.10653e-05	None	None	4.97561
SVBP	1.55472	1.38058e-08	1.16577e-07	None	None	7.85994
ERMAP	-0.734317	0.000149747	0.00056631	None	None	3.82464
AL512353.1	1.12191	0.357256	0.464203	None	None	0.44702
ZNF691	-0.947002	0.000266468	0.000944777	None	None	3.57436
SLC2A1	-0.385378	0.340415	0.446646	None	None	0.467991
SLC2A1-AS1	-2.40922	1.43396e-10	1.84883e-09	None	None	9.84346
AC099795.1	7.00626	7.88965e-05	0.000319736	None	None	4.10294
FAM183A	-0.372245	0.42502	0.533884	None	None	0.37159
EBNA1BP2	1.47933	5.79787e-20	3.49787e-18	None	ribosome biogenesis	19.2367
CFAP57	2.32674	0.0656993	0.115448	None	None	1.18244
TMEM125	1.77435	0.102507	0.167455	None	None	0.989248
C1orf210	7.06405	0.000224072	0.000809115	None	None	3.64961
TIE1	-5.39503	3.36045e-05	0.000147058	extracellular matrix organization	None	4.4736
AL139289.2	1.46664	0.127696	0.201153	None	None	0.893824
CDC20	0.570879	0.468328	0.575732	None	None	0.32945
ELOVL1	0.890412	1.64494e-05	7.64121e-05	None	None	4.78385
MED8	0.63118	0.0026197	0.00730934	None	None	2.58175
SZT2	-0.169355	0.357284	0.464208	None	None	0.446987
HYI	-0.193959	0.869917	0.918882	None	None	0.0605222
HYI-AS1	NA	NA	NA	None	None	NA
PTPRF	-1.01245	2.73121e-08	2.16791e-07	None	None	7.56364
KDM4A	2.1854	0.16008	0.242501	None	None	0.795664
KDM4A-AS1	2.86948	0.00342457	0.00924706	None	None	2.46539
ST3GAL3	-0.66972	0.639564	0.731797	None	None	0.194116
AL451062.1	7.04817	9.05567e-08	6.49955e-07	None	None	7.04308
ARTN	0	1	1	None	None	0
AL357079.1	1.42665	0.427779	0.536437	None	None	0.36878
IPO13	-0.75533	0.248512	0.345912	None	None	0.604653
DPH2	0.535115	0.599306	0.697082	None	None	0.222352
ATP6V0B	1.06246	0.00344193	0.00927956	None	None	2.4632
B4GALT2	-0.870824	0.049669	0.091537	None	None	1.30391
CCDC24	0.114186	0.770753	0.844531	None	None	0.113085
SLC6A9	1.41162	0.0901001	0.150428	None	None	1.04527
AL139220.2	3.12695	0.0425056	0.0802865	None	None	1.37155
DMAP1	-0.115854	0.742011	0.820772	None	None	0.12959
ERI3	-0.941875	4.71177e-05	0.000200255	None	None	4.32682
ERI3-IT1	NA	NA	NA	None	None	NA
RNF220	-0.77659	0.0063664	0.0158932	None	None	2.19611
TMEM53	0.824961	0.00535544	0.0136392	None	None	2.2712
ARMH1	0.730701	0.0879257	0.147272	None	None	1.05588
KIF2C	-0.978411	0.171752	0.256785	None	None	0.765098
AL592166.1	0.880665	0.437204	0.545261	None	None	0.359316
RPS8	2.27399	2.24211e-08	1.81039e-07	None	ribosome biogenesis	7.64934
BEST4	-7.46807	0.000761982	0.00244196	None	None	3.11806
PLK3	1.54222	4.79871e-07	3.00757e-06	None	None	6.31888
TCTEX1D4	0.501081	0.854906	0.908009	None	None	0.0680815
BTBD19	0.930727	0.00593615	0.0149279	None	None	2.22649
PTCH2	1.96595	0.0531305	0.0968005	None	None	1.27466
EIF2B3	-0.13769	0.62907	0.722633	None	None	0.201301
HECTD3	-0.321708	0.139126	0.215844	None	None	0.856592
UROD	-0.320237	0.674463	0.762628	None	None	0.171042
ZSWIM5	0.784677	0.0113432	0.0261876	None	None	1.94526
LINC01144	NA	NA	NA	None	None	NA
HPDL	8.21075	2.90824e-06	1.56991e-05	None	None	5.53637
MUTYH	0.448719	0.0801617	0.136278	None	None	1.09603
TOE1	0.512259	0.0754232	0.129612	None	None	1.1225
TESK2	-1.92379	8.12064e-07	4.87467e-06	cell-substrate adhesion	None	6.09041
CCDC163	2.29434	0.347846	0.454374	None	None	0.458613
MMACHC	2.72185	0.0767868	0.131668	None	None	1.11471
PRDX1	1.73108	3.91374e-06	2.05825e-05	None	None	5.40741
AKR1A1	1.366	2.39954e-06	1.31567e-05	None	None	5.61987
NASP	-0.40311	0.000911858	0.00286177	None	None	3.04007
CCDC17	2.55324	0.160642	0.243188	None	None	0.794141
GPBP1L1	0.297213	0.0669553	0.117234	None	None	1.17421
TMEM69	0.453123	0.0118737	0.0272355	None	None	1.92541
IPP	-0.736125	0.00029604	0.0010385	None	None	3.52865
AL604028.1	NA	NA	NA	None	None	NA
MAST2	0.329333	0.0776563	0.132831	None	None	1.10982
PIK3R3	2.08625	0.16816	0.252497	None	None	0.774277
AL358075.2	NA	NA	NA	None	None	NA
TSPAN1	-0.299902	0.933638	0.962899	None	None	0.0298214
POMGNT1	0.632673	0.00906847	0.021556	None	None	2.04247
LURAP1	-0.837701	0.0417657	0.0791783	None	None	1.37918
RAD54L	-0.995769	0.0818871	0.138645	None	None	1.08678
LRRC41	-0.897627	1.98364e-07	1.33859e-06	None	None	6.70254
UQCRH	0.902432	2.41137e-05	0.000108852	None	None	4.61774
NSUN4	-0.0107155	0.946944	0.970259	None	None	0.0236756
FAAH	-0.165895	0.503563	0.609402	None	None	0.297947
MKNK1-AS1	8.27779	5.0099e-10	5.74851e-09	None	None	9.30017
MKNK1	0.269719	0.288692	0.390957	None	None	0.539565
MOB3C	-0.039749	0.98009	0.994974	None	None	0.00873413
ATPAF1	-0.867816	0.000278104	0.00098168	None	None	3.55579
TEX38	2.16941	0.476574	0.583513	None	None	0.32187
EFCAB14-AS1	4.19094	0.00330129	0.00895198	None	None	2.48132
EFCAB14	-0.182532	0.235675	0.331653	None	None	0.627687
CYP4B1	-10.486	2.17558e-14	5.90361e-13	None	None	13.6624
CYP4X1	-3.646	0.399983	NA	None	None	0.397958
CYP4Z1	-9.94776	0.0191975	0.0412204	None	None	1.71675
CYP4A22-AS1	-0.656997	0.881036	NA	None	None	0.0550063
PDZK1IP1	NA	NA	NA	None	None	NA
TAL1	-7.19878	0.00185206	0.00536005	None	None	2.73234
STIL	-0.60609	0.0564632	0.101819	None	None	1.24823
CMPK1	-0.474482	0.00740308	0.0181436	None	None	2.13059
LINC01389	7.94703	2.16951e-09	2.16219e-08	None	None	8.66364
TRABD2B	-7.58358	0.000789251	0.00251817	None	None	3.10278
LINC02794	NA	NA	NA	None	None	NA
AL109659.1	NA	NA	NA	None	None	NA
SLC5A9	NA	NA	NA	None	None	NA
AL109659.2	NA	NA	NA	None	None	NA
SPATA6	-2.23696	0.0679979	0.118713	None	None	1.1675
AGBL4	-1.89337	0.000248868	0.00088869	None	None	3.60403
BEND5	NA	NA	NA	None	None	NA
AC099788.1	3.27334	0.110601	0.178489	None	None	0.956242
ELAVL4	0	1	NA	None	None	0
FAF1	-1.17753	8.62808e-07	5.1583e-06	None	None	6.06409
CDKN2C	-4.47488	0.0340312	0.066778	None	None	1.46812
LINC01562	0.0920669	0.943266	0.969026	None	None	0.025366
RNF11	0.195589	0.239329	0.335911	None	None	0.621004
AL162430.2	7.24974	1.1519e-10	1.51261e-09	None	None	9.93859
TTC39A	1.43339	6.05316e-06	3.07385e-05	None	None	5.21802
TTC39A-AS1	8.81549	2.34574e-10	2.88666e-09	None	None	9.62972
EPS15	-0.00238909	0.988989	1	None	None	0.0048087
AC104170.1	-2.44995	2.91338e-18	1.36993e-16	None	None	17.5356
OSBPL9	-0.0363133	0.844534	0.900282	None	None	0.0733829
NRDC	0.288649	0.0620333	0.110023	None	None	1.20737
RAB3B	-1.35008	1.73288e-06	9.75508e-06	None	None	5.76123
TXNDC12	0.477383	0.00439338	0.0115067	None	None	2.3572
KTI12	7.90497	2.74258e-10	3.31338e-09	None	None	9.56184
AL445685.1	7.75909	4.04683e-10	4.73693e-09	None	None	9.39289
BTF3L4	0.424391	0.00979817	0.0230648	None	None	2.00886
ZFYVE9	-1.37221	3.33426e-10	3.97315e-09	None	None	9.477
CC2D1B	-0.394887	0.0394072	0.0754668	None	None	1.40442
AL513218.1	NA	NA	NA	None	None	NA
AL513218.2	6.72095	2.88414e-05	0.000127936	None	None	4.53998
ORC1	-0.107311	0.875346	0.922765	None	None	0.0578203
PRPF38A	0.231828	0.0825864	0.139633	None	None	1.08309
TUT4	-1.053	1.13417e-06	6.63185e-06	None	None	5.94532
GPX7	2.57557	0.397057	NA	None	None	0.401147
SHISAL2A	3.21881	0.142279	NA	None	None	0.84686
COA7	2.48617	2.35131e-15	7.45618e-14	None	None	14.6287
ZYG11B	-0.705009	8.50772e-05	0.000342016	None	None	4.07019
ZYG11A	1.92323	0.00018541	0.000684978	None	None	3.73187
ECHDC2	-1.2748	0.00090732	0.00284893	None	None	3.04224
SCP2	-0.695694	0.0206079	0.0436816	None	None	1.68597
PODN	-7.10345	0.0950203	NA	None	None	1.02218
SLC1A7	NA	NA	NA	None	None	NA
CPT2	-1.33178	1.13767e-08	9.83392e-08	None	None	7.94398
AL606760.2	0.410679	0.829155	0.889404	None	None	0.0813644
CZIB	1.89865	NA	NA	None	None	NA
AL606760.3	1.1388	0.675557	0.763508	None	None	0.170338
MAGOH	0.590185	6.89887e-05	0.000282508	None	None	4.16122
AL606760.1	9.91885	8.19404e-15	2.38186e-13	None	None	14.0865
LRP8	0.486341	0.202862	0.293996	None	None	0.692799
LINC01771	-1.34612	0.169848	0.254394	None	None	0.769939
AC119428.2	-0.756838	0.787577	0.858163	None	None	0.103707
LINC02812	3.42256	0.422233	NA	None	None	0.374448
GLIS1	3.91729	0.189257	NA	None	None	0.722947
NDC1	0.224913	0.394478	0.503095	None	None	0.403978
YIPF1	-0.127177	0.408546	0.517254	None	None	0.388759
DIO1	7.13861	8.34234e-11	1.13913e-09	None	None	10.0787
HSPB11	-1.07915	4.02939e-08	3.09711e-07	None	None	7.39476
LRRC42	-0.519292	0.000763191	0.00244397	None	None	3.11737
LDLRAD1	0	1	NA	None	None	0
TMEM59	0.99313	6.54981e-09	5.87187e-08	None	None	8.18377
TCEANC2	-0.450386	0.129712	0.203743	None	None	0.887021
CYB5RL	7.60783	1.23973e-05	5.90914e-05	None	None	4.90667
MRPL37	0.573833	0.00802193	0.0194417	None	None	2.09572
SSBP3	-0.793706	0.00591065	0.0148696	None	None	2.22836
SSBP3-AS1	0	1	NA	None	None	0
AC099796.2	2.70006	0.183387	0.270847	None	None	0.736632
ACOT11	-0.877609	0.0365713	0.0709351	None	None	1.43686
MROH7	2.61851	0.129596	0.203595	None	None	0.887408
TTC4	1.51765	0.291146	0.393615	None	None	0.535889
PARS2	5.66285	8.00931e-07	4.81501e-06	None	None	6.09641
TTC22	0	1	NA	None	None	0
LEXM	NA	NA	NA	None	None	NA
DHCR24	1.04064	0.008089	0.0195697	None	None	2.09211
AC096536.3	6.51353	2.23853e-08	1.80826e-07	None	None	7.65004
DHCR24-DT	NA	NA	NA	None	None	NA
USP24	0.0656807	0.804931	0.871735	None	None	0.0942416
MIR4422HG	-1.26168	0.750488	NA	None	None	0.124656
AL603840.1	-1.20466	0.240008	0.336639	None	None	0.619775
LINC01753	-2.85549	0.0597889	0.106732	None	None	1.22338
AC119674.1	1.63518	0.0209772	0.0443566	None	None	1.67825
PLPP3	0.244117	0.368359	0.475506	None	None	0.433729
PRKAA2	0.640755	0.273482	0.3745	None	None	0.563072
FYB2	-2.3122	0.121803	0.193154	None	None	0.914344
DAB1	-0.0142424	0.975618	0.991746	None	None	0.0107202
OMA1	0.521508	0.730158	0.811029	None	None	0.136583
AL035411.3	0	1	NA	None	None	0
TACSTD2	11.0375	2.32018e-13	5.35007e-12	None	None	12.6345
MYSM1	0.144704	0.361573	0.468607	None	None	0.441804
AL136985.3	-2.22344	0.495558	NA	None	None	0.304905
JUN	1.44433	0.00699317	0.0172469	None	None	2.15533
LINC01135	0.0279384	0.956784	0.977734	None	None	0.0191863
LINC01358	-4.70572	0.0362728	0.0704489	None	None	1.44042
AC093425.1	0	1	NA	None	None	0
FGGY	-1.94601	0.000110257	0.0004316	None	None	3.9576
HOOK1	-0.127233	0.744133	0.822267	None	None	0.128349
CYP2J2	-0.417324	0.554836	0.6563	None	None	0.255836
C1orf87	0	1	NA	None	None	0
LINC01748	-1.09853	0.0118633	0.0272213	None	None	1.9258
AC099792.1	-6.79763	6.40488e-05	0.000263799	None	None	4.19349
NFIA	-3.71395	2.21076e-14	5.98214e-13	connective tissue development	None	13.6555
NFIA-AS2	1.6781	0.552934	0.654454	None	None	0.257327
TM2D1	0.299845	0.117279	0.187156	None	None	0.930781
PATJ	1.07694	0.0241261	0.0499202	None	None	1.61751
L1TD1	-1.816	0.00156877	0.00462815	None	None	2.80444
KANK4	-3.38978	4.24972e-09	3.95397e-08	None	None	8.37164
USP1	-0.611629	0.00160082	0.00471254	None	None	2.79566
DOCK7	-0.388871	0.00387393	0.0102952	None	None	2.41185
AC103923.1	-0.552194	0.485261	0.591657	None	None	0.314025
ATG4C	0.366416	0.204709	0.296048	None	None	0.688863
LINC01739	NA	NA	NA	None	None	NA
LINC00466	0.987537	0.816777	NA	None	None	0.0878966
ALG6	-0.219084	0.405242	0.514367	None	None	0.392285
ITGB3BP	-1.87861	5.78437e-07	3.56598e-06	None	None	6.23774
BX004807.1	7.0568	8.51754e-08	6.15477e-07	None	None	7.06969
EFCAB7	-0.852327	0.0983207	0.161871	None	None	1.00735
DLEU2L	0	1	NA	None	None	0
PGM1	-1.80323	8.74066e-16	2.96796e-14	None	None	15.0585
ROR1	-1.51092	0.00770051	0.0187504	None	None	2.11348
ROR1-AS1	1.76316	0.412055	0.520666	None	None	0.385045
AL445205.1	NA	NA	NA	None	None	NA
UBE2U	-5.31056	0.000191494	0.000702988	None	None	3.71784
CACHD1	-6.49485	8.42236e-10	9.20176e-09	None	None	9.07457
RAVER2	-2.28338	0.00014633	0.000554591	None	None	3.83467
JAK1	0.715043	0.00838619	0.0201717	None	None	2.07644
LINC01359	0	1	NA	None	None	0
AL357078.2	NA	NA	NA	None	None	NA
AK4	1.13461	9.21406e-10	9.98146e-09	None	oxidative phosphorylation	9.03555
DNAJC6	1.62235	0.000620619	0.00203288	None	None	3.20717
AL139294.1	5.09601	5.50085e-16	1.94353e-14	None	None	15.2596
LEPROT	2.04727	0.287048	0.389216	None	None	0.542045
LEPR	-0.0247078	0.937002	0.96495	None	None	0.0282595
AC119800.1	0.680772	0.876001	NA	None	None	0.0574956
PDE4B	2.66074	0.00222392	0.0063022	None	carbohydrate derivative catabolic process	2.65288
SGIP1	-3.28446	0.0115345	0.0265654	None	None	1.938
AL139147.1	0	1	NA	None	None	0
TCTEX1D1	-2.22344	0.579876	NA	None	None	0.236665
WDR78	-0.394473	0.234932	0.330875	None	None	0.629057
MIER1	0.44939	0.00448107	0.0117172	None	None	2.34862
SLC35D1	-2.45285	1.24627e-05	5.9329e-05	None	None	4.90439
C1orf141	-0.299884	0.945753	NA	None	None	0.0242225
IL23R	0	1	NA	None	None	0
IL12RB2	9.50905	6.22789e-16	2.18431e-14	None	None	15.2057
SERBP1	1.56668	1.00996e-19	5.80124e-18	None	ribosome biogenesis	18.9957
GADD45A	2.44472	1.01318e-08	8.8475e-08	None	None	7.99431
GNG12	0.395206	0.164841	0.248348	None	None	0.782935
GNG12-AS1	-0.818731	0.0100553	0.0235675	None	None	1.99761
DIRAS3	-5.04835	0.238126	NA	None	None	0.623194
WLS	0.0109611	0.983877	0.997657	None	None	0.00705929
DEPDC1	-0.438352	0.480848	0.587547	None	None	0.317992
AL033530.1	-0.314014	0.678305	0.765848	None	None	0.168575
AL691520.1	-2.22345	0.569114	NA	None	None	0.244801
LINC01707	-0.618647	0.697139	0.782187	None	None	0.15668
LINC02791	NA	NA	NA	None	None	NA
LRRC7	-0.0427993	0.964378	0.983499	None	None	0.0157529
LRRC40	-0.322605	0.188757	0.277155	None	None	0.724096
SRSF11	0.261116	0.122512	0.194078	None	None	0.91182
ANKRD13C	0.529625	1.27391e-06	7.35921e-06	None	None	5.89486
HHLA3	1.10969	4.06826e-05	0.000175095	None	None	4.39059
CTH	5.49158	1.67228e-10	2.13208e-09	None	None	9.77669
PTGER3	1.06042	0.494049	0.600198	None	None	0.30623
ZRANB2-AS1	1.40354	0.256882	0.355859	None	None	0.590266
ZRANB2	-0.0981717	0.469086	0.576479	None	None	0.328748
ZRANB2-AS2	-0.608905	0.713503	0.797004	None	None	0.146604
NEGR1	-4.25999	0.000177617	0.000659363	None	None	3.75051
AL513166.1	3.56012	0.122983	0.194737	None	None	0.910154
AL583808.1	0.64501	0.814516	0.878633	None	None	0.0891004
LRRIQ3	2.82904	0.132285	0.206971	None	None	0.87849
FPGT	2.45793	NA	NA	None	None	NA
TNNI3K	5.56659	1.64094e-06	9.28384e-06	None	None	5.78491
ERICH3	NA	NA	NA	None	None	NA
CRYZ	0.458159	0.234744	0.330658	None	None	0.629405
TYW3	0.237543	0.359539	0.466506	None	None	0.444253
SLC44A5	-1.4444	7.28903e-06	3.63977e-05	None	None	5.13733
ACADM	-0.626506	0.24798	0.345372	None	None	0.605583
RABGGTB	1.02584	5.34792e-08	4.00351e-07	None	None	7.27181
MSH4	-0.154368	0.617394	0.712849	None	None	0.209438
AC092813.1	0.842019	0.817128	NA	None	None	0.0877099
ST6GALNAC3	-4.99736	0.000279219	0.00098507	None	None	3.55406
ST6GALNAC5	-1.45923	0.563133	0.663823	None	None	0.249389
AL035409.1	NA	NA	NA	None	None	NA
PIGK	-0.202478	0.474566	0.581612	None	None	0.323703
AK5	6.477	2.46937e-06	1.3501e-05	None	None	5.60741
AC118549.1	1.29656	3.44441e-17	1.403e-15	None	None	16.4629
USP33	0.31517	0.025639	0.0526023	None	None	1.5911
MIGA1	0.639713	0.00431686	0.0113264	None	None	2.36483
NEXN-AS1	8.18665	7.8726e-11	1.07883e-09	None	None	10.1039
NEXN	0.427743	0.148283	0.227496	None	None	0.828909
FUBP1	-0.0453852	0.769943	0.843885	None	None	0.113541
DNAJB4	1.35416	NA	NA	None	None	NA
GIPC2	-0.613115	0.0236859	0.0491897	None	None	1.62551
AC103591.3	1.36359	0.384457	0.492508	None	None	0.415153
AC096531.2	0	1	NA	None	None	0
PTGFR	-6.33335	0.137127	NA	None	None	0.862876
IFI44L	-5.81364	0.0105263	0.024538	None	None	1.97772
IFI44	-5.34411	0.0741041	0.127643	None	None	1.13016
ADGRL4	-6.57202	9.54271e-09	8.35586e-08	None	None	8.02033
AC099671.1	-2.22342	0.613925	NA	None	None	0.211885
AL606519.1	NA	NA	NA	None	None	NA
AL136234.1	-1.58098	4.00353e-05	0.000172679	None	None	4.39756
LINC01781	5.8063	2.43843e-08	1.9582e-07	None	None	7.61289
ADGRL2	0.308008	0.414546	0.523262	None	None	0.382427
AL157944.1	8.09386	7.46661e-11	1.03055e-09	None	None	10.1269
LINC01362	2.59836	0.0338599	0.0664555	None	None	1.47031
AC116099.1	0	1	1	None	None	0
LINC01725	-0.340508	0.498237	0.604252	None	None	0.302564
TTLL7	7.32506	1.13273e-07	7.94358e-07	None	None	6.94588
AC104454.2	NA	NA	NA	None	None	NA
AL359504.2	5.21496	0.216326	NA	None	None	0.664891
PRKACB	-0.32087	0.529357	0.633411	None	None	0.276251
SAMD13	-2.61099	0.219907	NA	None	None	0.657762
RPF1	0.669129	2.72489e-06	1.47968e-05	None	None	5.56465
GNG5	1.23028	3.4574e-07	2.22212e-06	None	None	6.46125
SPATA1	2.35355	7.2039e-07	4.3725e-06	None	None	6.14243
CTBS	1.13585	7.13165e-05	0.000291232	None	carbohydrate derivative catabolic process	4.14681
AL359762.1	3.09236	0.291032	0.39356	None	None	0.536059
SSX2IP	-1.75853	1.89336e-06	1.05778e-05	None	None	5.72277
LPAR3	-1.88247	0.156303	0.237707	None	None	0.806032
MCOLN2	4.9652	0.0135825	0.0306277	None	None	1.86702
WDR63	3.08947	0.00698601	0.0172337	None	None	2.15577
MCOLN3	-3.55556	0.0324492	0.064103	None	None	1.4888
SYDE2	-0.205207	0.599799	0.697487	None	None	0.221995
C1orf52	0.0772101	0.684484	0.771188	None	None	0.164637
BCL10	1.04561	6.33294e-08	4.67298e-07	None	None	7.19839
AL078459.1	1.0932	0.0541215	0.0982143	None	None	1.26663
DDAH1	-1.12929	0.112342	0.180691	None	None	0.949457
AC092807.3	NA	NA	NA	None	None	NA
CCN1	2.41239	0.106892	0.173547	None	None	0.971056
ZNHIT6	-0.966849	0.0110748	0.0256886	None	None	1.95566
COL24A1	-6.54423	0.00922132	0.0218706	extracellular matrix organization	None	2.03521
LINC02795	2.03004	0.636299	NA	None	None	0.196339
ODF2L	1.84662	3.89277e-06	2.04835e-05	None	None	5.40974
CLCA4-AS1	4.03915	0.000532598	0.00177332	None	None	3.2736
AL049597.2	NA	NA	NA	None	None	NA
SH3GLB1	-0.474892	0.0474433	0.0881038	None	None	1.32383
AL355981.1	1.2682	0.769323	NA	None	None	0.113891
SELENOF	0.253329	0.121033	0.19214	None	None	0.917097
HS2ST1	0.616531	0.0207192	0.0438885	None	None	1.68363
LINC01140	4.09463	0.0047311	0.0122624	None	None	2.32504
LINC02801	-2.05335	0.21706	0.310329	None	None	0.66342
LMO4	0.797518	0.000536703	0.00178575	None	None	3.27027
PKN2-AS1	-1.49135	1.5037e-08	1.25537e-07	None	None	7.82284
PKN2	-0.993071	0.000229126	0.000825966	None	None	3.63993
GTF2B	0.185382	0.20821	0.300158	None	None	0.681499
KYAT3	-0.582072	0.000129453	0.000498307	None	None	3.88789
RBMXL1	1.39291	NA	NA	None	None	NA
GBP3	-0.412231	0.266948	0.367178	None	None	0.573573
GBP1	-2.28992	0.000132392	0.000508091	cell-substrate adhesion	None	3.87814
GBP2	-1.30844	0.000128705	0.000495725	None	None	3.8904
AC104459.1	-4.39111	0.0951931	0.157642	None	None	1.02139
GBP4	-3.06392	0.191373	0.280373	None	None	0.71812
GBP5	0	1	NA	None	None	0
AL596214.1	3.92101	0.0707371	0.122647	None	None	1.15035
LRRC8B	0.0567532	0.907398	0.946007	None	None	0.0422023
LRRC8C-DT	6.59521	7.70201e-08	5.60133e-07	None	None	7.1134
LRRC8C	0.665535	0.668479	0.75783	None	None	0.174913
AC099568.2	8.07481	1.11626e-05	5.36727e-05	None	None	4.95224
LRRC8D	4.38625	NA	NA	None	None	NA
ZNF326	0.218294	0.0314097	0.0624386	None	None	1.50294
AC098656.1	-0.207137	0.960179	NA	None	None	0.0176479
AL627316.1	0	1	NA	None	None	0
LINC02609	5.69321	5.91531e-07	3.64436e-06	None	None	6.22802
AC091614.1	0	1	NA	None	None	0
ZNF644	-0.681789	0.00283134	0.00783601	None	None	2.54801
HFM1	-1.92213	0.000270583	0.000957598	None	None	3.5677
CDC7	-1.36443	1.79936e-09	1.82649e-08	None	None	8.74488
TGFBR3	0.93582	9.24695e-05	0.000368744	None	None	4.034
BRDT	-0.239069	0.684107	0.770946	None	None	0.164876
EPHX4	0.411412	0.723357	0.805385	None	None	0.140648
BTBD8	-1.54594	7.52634e-11	1.0373e-09	None	None	10.1234
C1orf146	-0.299917	0.945746	NA	None	None	0.0242253
GLMN	0.376008	0.0345803	0.067704	None	None	1.46117
RPAP2	-0.253183	0.148961	0.22839	None	None	0.826928
GFI1	1.29319	0.583685	NA	None	None	0.233822
EVI5	-0.679633	1.28244e-07	8.92403e-07	None	None	6.89196
RPL5	2.54805	4.55192e-10	5.28623e-09	None	ribosome biogenesis	9.34181
DIPK1A	2.05246	NA	NA	None	None	NA
AC093577.1	1.13404	0.777865	0.850332	None	None	0.109096
MTF2	0.0160672	0.905957	0.945122	None	None	0.0428922
TMED5	1.04165	0.000107947	0.000423338	None	None	3.96679
CCDC18	0.518504	0.0610415	0.108584	None	None	1.21438
CCDC18-AS1	0.457571	0.833543	0.892733	None	None	0.0790719
DR1	0.123056	0.548372	0.650513	None	None	0.260925
FNBP1L	-0.171256	0.657852	0.748303	None	None	0.181872
BCAR3	-0.248977	0.332953	0.439108	None	None	0.477617
AL109613.1	8.6248	3.71231e-11	5.47852e-10	None	None	10.4304
AL049796.1	3.49209	0.131473	0.20597	None	None	0.881163
DNTTIP2	0.937817	0.000863291	0.00272316	None	None	3.06384
GCLM	-0.533378	0.140386	0.2175	None	None	0.852676
ABCA4	-2.96211	0.00211164	0.00601513	None	None	2.67538
ARHGAP29	-0.219973	0.600276	0.697924	None	None	0.221649
ARHGAP29-AS1	-1.65119	0.237694	0.33391	None	None	0.623982
AC097059.1	0	1	NA	None	None	0
ABCD3	0.181801	0.356123	0.46295	None	None	0.4484
F3	-3.01737	0.000273216	0.000966204	None	None	3.56349
SLC44A3	-1.4187	6.41718e-07	3.92832e-06	None	None	6.19266
CNN3	-1.47901	1.08727e-10	1.44255e-09	None	None	9.96366
AC105942.1	-3.56485	3.73108e-05	0.000161728	None	None	4.42816
ALG14	-0.77056	0.00058486	0.00192958	None	None	3.23295
TLCD4	0.180726	0.911136	0.948718	None	None	0.040417
AC092802.1	2.00065	0.130921	0.205273	None	None	0.88299
RWDD3	1.1498	0.460681	0.568224	None	None	0.3366
AC092802.4	NA	NA	NA	None	None	NA
LINC01787	0	1	NA	None	None	0
PTBP2	-0.597712	0.00248887	0.00697065	None	None	2.604
DPYD	-3.5241	0.000576933	0.00190605	None	None	3.23887
DPYD-AS1	-7.47059	0.0242706	0.0501758	None	None	1.61492
DPYD-IT1	NA	NA	NA	None	None	NA
MIR137HG	0	1	1	None	None	0
BX005019.1	0	1	NA	None	None	0
SNX7	-0.681536	0.000866777	0.00273235	None	None	3.06209
AL445433.2	-3.47725	0.423263	NA	None	None	0.37339
PLPPR4	0.864744	0.842394	NA	None	None	0.0744846
LINC01708	3.52689	0.0056698	0.0143427	None	None	2.24643
PALMD	3.98923	0.0010436	0.00322135	None	None	2.98147
FRRS1	0.780125	0.0864676	0.145325	None	None	1.06315
AGL	-1.29656	1.37639e-06	7.87771e-06	None	None	5.86126
AC118553.1	0	1	1	None	None	0
SLC35A3	0.88487	NA	NA	None	None	NA
MFSD14A	2.24518	NA	NA	None	None	NA
AC093019.2	2.52969	5.09368e-08	3.83525e-07	None	None	7.29297
SASS6	0.43045	0.0303928	0.0607444	None	None	1.51723
TRMT13	-0.306747	0.178494	0.264802	None	None	0.748376
LRRC39	1.23367	0.000220839	0.000798644	None	None	3.65592
DBT	0.202164	0.486657	0.593026	None	None	0.312777
AL445928.2	2.64526	0.0673369	0.117792	None	None	1.17175
RTCA-AS1	2.38161	0.0516492	0.0945611	None	None	1.28694
RTCA	-1.05557	0.0111275	0.0257766	None	None	1.9536
CDC14A	-0.870175	0.00025507	0.000909068	None	None	3.59334
AL589990.1	8.02053	1.3171e-09	1.37703e-08	None	None	8.88038
LINC01349	NA	NA	NA	None	None	NA
VCAM1	-8.60579	0.0428692	0.0808595	cell-substrate adhesion	None	1.36785
EXTL2	0.0470903	0.851299	0.9055	None	None	0.0699178
AC104506.1	2.8336	0.0436767	0.0821106	None	None	1.35975
SLC30A7	-0.39116	0.0071525	0.0176065	None	None	2.14554
DPH5	-0.447365	0.0938164	0.155627	None	None	1.02772
AC093157.2	NA	NA	NA	None	None	NA
AC093157.1	-0.939576	1.6114e-05	7.49993e-05	None	None	4.7928
S1PR1	0	1	NA	None	None	0
LINC01307	-7.57163	6.12036e-06	3.10632e-05	None	None	5.21322
LINC01709	NA	NA	NA	None	None	NA
OLFM3	0.774977	0.85878	NA	None	None	0.0661183
AC099567.1	1.58218	0.248128	0.345478	None	None	0.605324
COL11A1	-5.05466	1.07979e-10	1.43462e-09	connective tissue development	None	9.96666
AC095032.1	0.186211	0.912622	0.950008	None	None	0.0397091
RNPC3	-0.0850519	0.528218	0.632488	None	None	0.277187
AMY2B	-1.74148	2.92187e-07	1.90992e-06	None	None	6.53434
AL591888.1	-0.299861	0.945757	NA	None	None	0.0242206
LINC01676	-7.19434	0.0908292	NA	None	None	1.04177
LINC01677	NA	NA	NA	None	None	NA
AL355306.2	0	1	NA	None	None	0
PRMT6	0.574736	0.693445	0.778908	None	None	0.158988
NTNG1	1.23625	0.242064	0.339028	None	None	0.616069
VAV3	0.772848	0.000197758	0.000723352	None	None	3.70387
VAV3-AS1	NA	NA	NA	None	None	NA
LINC02785	0	1	NA	None	None	0
SLC25A24	-0.484562	0.221979	0.315996	None	None	0.653687
FAM102B	-0.347421	0.527115	0.631561	None	None	0.278095
HENMT1	5.05248	3.80799e-05	0.000164652	None	None	4.4193
AL160171.1	1.08315	0.637723	0.730236	None	None	0.195368
PRPF38B	-0.0481789	0.801054	0.869145	None	None	0.0963383
FNDC7	7.11637	0.000781507	0.0024972	None	None	3.10707
STXBP3	0.48551	0.000726453	0.00234314	None	None	3.13879
AKNAD1	2.35198	0.000143726	0.000546447	None	None	3.84246
SPATA42	-9.6893	3.06715e-06	1.64781e-05	None	None	5.51327
GPSM2	0.790126	7.18249e-06	3.59406e-05	None	None	5.14372
CLCC1	1.51124	NA	NA	None	None	NA
WDR47	0.845153	0.000757359	0.00242976	None	None	3.1207
TAF13	1.3655	1.93509e-07	1.3072e-06	None	None	6.7133
AL356488.3	1.86742	0.0383832	0.0738301	None	None	1.41586
TMEM167B	0.515668	0.00465821	0.0121062	None	None	2.33178
AL356488.2	-7.89999	0.000106536	0.000418574	None	None	3.9725
KIAA1324	0.0798565	0.848603	0.903516	None	None	0.0712953
SARS	-0.0432806	0.760389	0.835944	None	None	0.118964
CELSR2	5.57442	0.000208186	0.000756305	None	None	3.68155
PSRC1	-3.03831	0.00458261	0.0119469	None	None	2.33889
MYBPHL	0	1	NA	None	None	0
SORT1	-0.601975	0.0157658	0.0348664	None	None	1.80228
PSMA5	0.331476	0.000956824	0.00298871	None	None	3.01917
SYPL2	4.35115	0.117322	NA	None	None	0.93062
ATXN7L2	0.597318	0.74049	0.819705	None	None	0.130481
CYB561D1	1.25352	9.56844e-09	8.37457e-08	None	None	8.01916
AMIGO1	NA	NA	NA	None	None	NA
GNAI3	0.428554	0.0186736	0.0402893	None	None	1.72877
AL355310.1	NA	NA	NA	None	None	NA
AMPD2	-0.550434	0.0930499	0.1546	None	None	1.03128
GSTM4	-6.41749	0.0151657	0.0337329	None	None	1.81914
GSTM2	0.8773	NA	NA	None	None	NA
GSTM3	0.0851933	0.923573	0.957118	None	None	0.0345287
LINC01768	0	1	NA	None	None	0
CSF1	-5.46443	0.124199	NA	connective tissue development	None	0.905881
AHCYL1	-0.106574	0.305071	0.408886	None	None	0.515599
STRIP1	-0.262441	0.0722603	0.124927	None	None	1.1411
AL160006.1	0.887496	0.567036	0.667193	None	None	0.246389
LINC01397	NA	NA	NA	None	None	NA
SLC6A17	-6.67093	0.0464223	0.086484	None	None	1.33327
LINC02586	NA	NA	NA	None	None	NA
KCNC4	-4.11004	0.00017581	0.000653664	None	None	3.75496
RBM15-AS1	-2.45348	0.0655537	0.115275	None	None	1.1834
RBM15	-0.498643	0.0180485	0.0391614	None	None	1.74356
LAMTOR5-AS1	0.858335	NA	NA	None	None	NA
SLC16A4	-0.204464	0.455017	0.562721	None	None	0.341973
AL355488.1	-1.61733	3.95136e-06	2.07633e-05	None	None	5.40325
LAMTOR5	0.460229	0.0288083	0.0580128	None	None	1.54048
PROK1	NA	NA	NA	None	None	NA
CD53	1.45827	NA	NA	None	None	NA
AL360270.2	3.76945	0.016727	0.0367171	None	None	1.77658
AL360270.1	8.61841	6.82115e-13	1.43177e-11	None	None	12.1661
LRIF1	0.965493	8.24388e-07	4.94641e-06	None	None	6.08387
AL360270.3	0	1	NA	None	None	0
DRAM2	-0.528417	0.0185481	0.0400713	None	None	1.7317
CEPT1	-0.441263	0.0655622	0.115279	None	None	1.18335
AL355816.2	7.12691	1.04454e-07	7.37556e-07	None	None	6.98108
DENND2D	1.79271	1.60097e-09	1.64513e-08	None	None	8.79562
CHI3L2	2.04938	0.143997	0.222144	None	carbohydrate derivative catabolic process	0.841647
PIFO	0.797627	0.671587	0.760186	None	None	0.172898
OVGP1	1.33927	1.24982e-06	7.24188e-06	None	carbohydrate derivative catabolic process	5.90315
AL390195.2	8.83032	1.22246e-06	7.09406e-06	None	None	5.91276
AL390195.1	2.72134	0.144562	0.222818	None	None	0.839947
WDR77	1.07225	6.97572e-06	3.50134e-05	None	None	5.15641
ATP5PB	0.430091	0.00888017	0.0211661	None	None	2.05158
C1orf162	-1.65428	0.263941	0.363981	None	None	0.578494
TMIGD3	2.06658	0.453934	0.561709	None	None	0.343007
ADORA3	NA	NA	NA	None	None	NA
RAP1A	0.318904	0.0942967	0.156333	None	None	1.0255
LINC01160	NA	NA	NA	None	None	NA
INKA2	2.72298	4.0613e-12	7.26151e-11	None	None	11.3913
INKA2-AS1	0.775029	0.85877	NA	None	None	0.066123
AL049557.1	-1.26162	0.774684	NA	None	None	0.110875
DDX20	0.356135	0.0882331	0.147697	None	None	1.05437
KCND3	-3.31821	0.273647	0.374699	None	None	0.56281
AL445426.1	0	1	NA	None	None	0
CTTNBP2NL	1.03276	1.95129e-07	1.31722e-06	None	None	6.70968
WNT2B	1.26406	4.1026e-05	0.000176476	None	None	4.38694
ST7L	-0.359483	0.0806953	0.13704	None	None	1.09315
CAPZA1	0.345225	0.00232202	0.00654511	None	None	2.63413
MOV10	-1.13103	1.25735e-16	4.87318e-15	None	None	15.9005
AL603832.1	-6.61193	0.0338054	0.0663621	None	None	1.47101
RHOC	-0.0761956	0.814314	0.878575	None	None	0.0892082
PPM1J	0	1	NA	None	None	0
LINC01356	3.78989	7.91693e-07	4.7718e-06	None	None	6.10144
LINC01357	2.01417	0.320619	0.426063	None	None	0.494011
SLC16A1	1.44856	1.44237e-08	1.21156e-07	None	None	7.84092
SLC16A1-AS1	-1.60588	1.07357e-09	1.14488e-08	None	None	8.96917
AL390242.1	7.2707	8.91018e-08	6.40231e-07	None	None	7.05011
LRIG2-DT	2.03408	NA	NA	None	None	NA
LRIG2	-0.158678	0.205549	0.297037	None	None	0.687084
MAGI3	-3.02677	1.73803e-15	5.64199e-14	None	None	14.7599
PHTF1	-0.969131	0.000616084	0.00201975	None	None	3.21036
RSBN1	-0.905455	1.54724e-17	6.61107e-16	None	None	16.8104
AL137856.1	2.34891	0.324023	0.429664	None	None	0.489424
PTPN22	-2.33301	0.161335	0.244025	None	None	0.792271
AP4B1-AS1	2.81758	0.10719	0.173974	None	None	0.969846
BCL2L15	1.27323	0.768421	NA	None	None	0.114401
AP4B1	-2.06943	0.0238746	0.0494905	None	None	1.62206
DCLRE1B	1.84408	0.371633	0.478881	None	None	0.429886
HIPK1-AS1	0.285257	0.905768	0.944975	None	None	0.0429832
HIPK1	-0.114758	0.509081	0.614762	None	None	0.293213
OLFML3	-7.71461	0.0102815	0.0240373	None	None	1.98795
SYT6	NA	NA	NA	None	None	NA
TRIM33	0.666634	0.0104251	0.0243257	None	None	1.98192
BCAS2	0.926651	0.000326908	0.00113824	None	None	3.48557
DENND2C	7.35018	7.27055e-14	1.81386e-12	None	None	13.1384
AMPD1	2.27076	0.596237	NA	None	None	0.224581
NRAS	0.953479	5.69795e-06	2.90655e-05	None	None	5.24428
CSDE1	0.405217	0.00266879	0.00742576	None	None	2.57369
SIKE1	0.496836	0.0170097	0.0372268	None	None	1.7693
SYCP1	NA	NA	NA	None	None	NA
TSPAN2	-2.36533	0.295287	0.39794	None	None	0.529756
NGF-AS1	3.04901	0.0590574	0.10567	None	None	1.22873
NGF	1.38065	0.212887	0.30534	None	None	0.671851
VANGL1	0.294594	0.695367	0.780609	None	None	0.157786
CASQ2	-0.29987	0.945755	NA	None	None	0.0242214
SLC22A15	-2.18235	1.2411e-07	8.65834e-07	None	None	6.90619
MAB21L3	-1.2558	0.0128113	0.029115	None	None	1.89241
AL355538.1	0	1	NA	None	None	0
ATP1A1	3.29434	1.17539e-23	1.21892e-21	None	None	22.9298
ATP1A1-AS1	3.01883	0.0451729	0.0844269	None	None	1.34512
LINC01762	2.34752	2.80072e-06	1.51656e-05	None	None	5.55273
AL390066.1	0	1	NA	None	None	0
AL390066.2	0	1	NA	None	None	0
CD58	0.475996	0.0806285	0.136951	None	None	1.09351
IGSF3	-1.25026	6.74244e-09	6.03047e-08	None	None	8.17118
CD2	0	1	NA	None	None	0
AL157904.1	-0.299861	0.945757	NA	None	None	0.0242206
PTGFRN	2.6998	8.9028e-08	6.39941e-07	None	None	7.05047
CD101	7.29322	1.95447e-06	1.08762e-05	None	None	5.70897
AL445231.1	3.88871	0.0618892	0.109817	None	None	1.20838
TTF2	0.109975	0.621671	0.716301	None	None	0.206439
TRIM45	0.356671	0.486897	0.593238	None	None	0.312562
VTCN1	-3.88539	7.69862e-06	3.82241e-05	None	None	5.11359
LINC01525	4.58248	0.0461741	0.0860885	None	None	1.3356
AL358072.1	-5.54355	0.000441717	0.0014975	None	None	3.35486
MAN1A2	0.237833	0.287542	0.389748	None	None	0.541298
TENT5C	2.95665	0.0317428	0.0629637	None	None	1.49836
GDAP2	0.348694	0.035802	0.0696614	None	None	1.44609
WDR3	1.5892	1.07343e-08	9.33955e-08	None	ribosome biogenesis	7.96923
SPAG17	-0.228691	0.627087	0.721088	None	None	0.202673
TBX15	1.08005	0.444239	0.552384	None	None	0.352383
WARS2	0.426956	0.107285	0.174051	None	None	0.96946
WARS2-AS1	0.959515	NA	NA	None	None	NA
AL359915.1	8.22884	1.16699e-10	1.5272e-09	None	None	9.93293
LINC01780	-2.9137	0.506438	NA	None	None	0.295474
HSD3B2	NA	NA	NA	None	None	NA
HSD3B1	-1.54215	1.61329e-09	1.65513e-08	None	None	8.79229
LINC00622	2.68465	0.292644	0.395127	None	None	0.533661
ZNF697	1.48993	9.53729e-08	6.79944e-07	None	None	7.02058
PHGDH	1.35324	0.00633149	0.0158143	None	None	2.19849
HMGCS2	-7.93835	2.6548e-16	9.83251e-15	connective tissue development	None	15.576
NOTCH2	1.38116	0.000100753	0.000397797	None	None	3.99674
SEC22B	-0.951707	9.81993e-06	4.78282e-05	None	None	5.00789
NBPF26	-0.309893	0.444602	0.5528	None	None	0.352028
AC253572.2	0.37874	0.875356	0.922765	None	None	0.0578151
LINC00623	-1.90318	0.000570835	0.00188786	None	None	3.24349
FCGR1B	-0.299883	0.945753	NA	None	None	0.0242225
AC244453.3	-3.02516	0.0815858	0.13821	None	None	1.08839
AC244453.2	-2.22339	0.61393	NA	None	None	0.211881
AC244453.1	-9.86868	0.0201779	0.0429553	None	None	1.69512
FAM72B	0	1	NA	None	None	0
SRGAP2C	-0.441804	0.0964501	0.159366	None	None	1.0157
LINC02798	0.297723	0.847485	0.902475	None	None	0.0718681
AC239800.2	NA	NA	NA	None	None	NA
LINC02591	-0.350116	0.859277	0.911491	None	None	0.0658669
HIST2H3PS2	4.4187	0.0537992	0.0977587	None	None	1.26922
AC246680.1	-10.781	0.0111454	0.0258055	None	None	1.9529
LINC02802	2.51319	0.0542735	0.0984621	None	None	1.26541
NBPF15	-1.72037	0.0123831	0.0282549	None	None	1.90717
FP700111.1	-5.39033	0.000674757	0.00219262	None	None	3.17085
SRGAP2B	-0.196886	0.557172	0.658454	None	None	0.254011
FAM72D	-2.22344	0.613922	NA	None	None	0.211887
NBPF20	-6.1207	0.00754853	0.0184391	None	None	2.12214
GPR89A	-0.265089	0.196366	0.286333	None	None	0.706934
PDZK1	1.30485	0.220841	0.314608	None	None	0.655921
CD160	2.37626	0.136286	0.212263	None	None	0.865548
RNF115	-1.3865	1.59347e-07	1.0926e-06	None	None	6.79765
POLR3C	-0.175233	0.353348	0.46006	None	None	0.451798
NUDT17	3.05998	0.0995503	0.163419	None	None	1.00196
PIAS3	0.627782	0.00401369	0.0106299	None	None	2.39646
ANKRD35	NA	NA	NA	None	None	NA
ITGA10	2.43084	0.252049	0.350022	None	None	0.598515
PEX11B	-0.916903	0.0143241	0.032085	None	None	1.84393
RBM8A	1.1971	3.28057e-08	2.57309e-07	None	None	7.48405
LIX1L-AS1	9.0492	1.40166e-11	2.23662e-10	None	None	10.8534
LIX1L	-5.74572	0.000856842	0.00270504	None	None	3.0671
ANKRD34A	-0.299923	0.945745	NA	None	None	0.0242258
POLR3GL	0.999813	0.569104	0.668765	None	None	0.244808
TXNIP	-10.6866	3.44654e-16	1.25707e-14	None	None	15.4626
HJV	2.05371	0.630567	NA	None	None	0.200269
AC239799.2	8.57613	6.68456e-11	9.34718e-10	None	None	10.1749
LINC01719	0.547966	0.146058	0.224673	None	None	0.835474
NBPF10	0.339452	0.480631	0.587394	None	None	0.318188
NOTCH2NLA	2.41073	NA	NA	None	None	NA
AC239799.1	NA	NA	NA	None	None	NA
AC245407.2	1.94304	NA	NA	None	None	NA
NBPF12	-0.265204	0.433573	0.541931	None	None	0.362938
PRKAB2	-0.27534	0.426091	0.535069	None	None	0.370497
AC242426.2	-0.524629	0.0669773	0.117252	None	None	1.17407
FMO5	0.639128	0.310976	0.415523	None	None	0.507273
CHD1L	-10.0482	9.83185e-06	4.78741e-05	None	None	5.00736
LINC00624	-1.22024	NA	NA	None	None	NA
BCL9	0.806112	0.000518153	0.00173214	None	None	3.28554
ACP6	-0.757178	0.00342656	0.00925113	None	None	2.46514
GJA5	1.77385	0.000904494	0.00284098	None	None	3.04359
GPR89B	-0.0780104	0.749535	0.826474	None	None	0.125208
LINC02804	-3.05284	0.175619	0.261345	None	None	0.755428
NBPF11	-1.63341	1.07762e-18	5.45494e-17	None	None	17.9675
LINC02805	3.3518	0.210863	0.303231	None	None	0.676
AC239809.3	-3.32513	0.000113345	0.000442246	None	None	3.9456
LINC01731	-0.395834	0.743177	0.821541	None	None	0.128908
LINC01138	1.66491	NA	NA	None	None	NA
LINC02806	-1.44857	0.439463	0.547474	None	None	0.357078
AC245100.1	-0.852616	0.568015	0.668099	None	None	0.24564
AC245100.6	-11.2553	0.00805215	0.0194977	None	None	2.09409
PPIAL4G	-2.22339	0.61393	NA	None	None	0.211881
NBPF14	-0.727661	0.0665472	0.116658	None	None	1.17687
NUDT4B	NA	NA	NA	None	None	NA
PDE4DIP	-1.9296	1.06337e-05	5.13224e-05	None	None	4.97332
AC239804.1	-7.82595	NA	NA	None	None	NA
NBPF9	-0.99669	0.00359643	0.0096446	None	None	2.44413
AC245297.3	-1.49523	0.000154557	0.000581977	None	None	3.81091
NOTCH2NLC	1.31226	NA	NA	None	None	NA
NBPF19	-3.14987	2.35171e-07	1.56822e-06	None	None	6.62862
AC242842.1	NA	NA	NA	None	None	NA
FCGR1A	0	1	NA	None	None	0
HIST2H2BF	-1.53973	1.34889e-06	7.73414e-06	None	None	5.87002
AC243772.2	-1.2908	0.481789	0.588358	None	None	0.317143
HIST2H4A	0.304743	0.944658	NA	None	None	0.0247254
HIST2H2AA4	8.66324	3.78223e-12	6.81974e-11	None	None	11.4223
HIST2H4B	-0.299931	0.945744	0.969341	None	None	0.0242264
AC239868.1	0.664389	0.771862	0.845553	None	None	0.11246
HIST2H2BE	-0.422426	0.0356495	0.069421	None	None	1.44795
HIST2H2AC	1.30864	0.00190894	0.00550722	None	None	2.71921
HIST2H2AB	-0.299904	0.935106	0.963884	None	None	0.0291391
BOLA1	0.0589211	0.797696	0.86653	None	None	0.0981627
SV2A	3.22268	0.282657	0.384676	None	None	0.548741
SF3B4	0.808552	0.00732022	0.0179704	None	None	2.13548
MTMR11	-1.83369	6.45166e-16	2.25046e-14	None	None	15.1903
OTUD7B	-1.4049	2.9768e-17	1.21769e-15	None	None	16.5263
AC244033.2	2.518	0.209981	0.302234	None	None	0.677821
VPS45	-0.448048	0.0495453	0.0913737	None	None	1.305
PLEKHO1	-4.96285	5.73731e-06	2.92584e-05	None	None	5.24129
AC242988.2	NA	NA	NA	None	None	NA
ANP32E	-0.108523	0.550829	0.652687	None	None	0.258983
AC242988.1	-3.55488	0.412454	NA	None	None	0.384624
APH1A	0.00512811	0.983658	0.997579	None	None	0.00715581
C1orf54	-0.914771	0.0208056	0.0440521	None	None	1.68182
CIART	NA	NA	NA	None	None	NA
MRPS21	0.529015	0.000731251	0.00235466	None	None	3.13593
PRPF3	-0.817735	1.54162e-10	1.97568e-09	None	None	9.81202
RPRD2	-0.896507	5.78785e-12	1.00217e-10	None	None	11.2375
TARS2	0.00431789	0.987829	1	None	None	0.00531816
ECM1	3.31744	1.33292e-09	1.39206e-08	None	None	8.8752
FALEC	8.69823	1.12735e-08	9.75126e-08	None	None	7.94794
AL356356.1	-0.96318	0.00689778	0.0170555	None	None	2.16129
ADAMTSL4	0.203734	0.438486	0.546505	None	None	0.358044
ADAMTSL4-AS1	2.5773	0.215512	0.308607	None	None	0.666529
MCL1	1.4788	8.51833e-09	7.52067e-08	None	intrinsic apoptotic signaling pathway in response to DNA damage	8.06965
ENSA	0.513251	3.83502e-07	2.44191e-06	None	None	6.41623
GOLPH3L	-0.859174	1.44028e-06	8.22619e-06	None	None	5.84155
HORMAD1	-5.43218	0.00518032	0.0132513	None	None	2.28564
CTSS	0.346695	0.737162	0.817016	None	None	0.132437
CTSK	-0.00663922	0.977013	0.992875	None	None	0.0100997
ARNT	0.322352	0.0992293	0.163017	None	None	1.00336
CTXND2	5.45278	5.36508e-05	0.00022454	None	None	4.27042
SETDB1	-0.109587	0.438099	0.5462	None	None	0.358428
CERS2	0.238632	0.30386	0.407519	None	None	0.517326
ANXA9	4.57565	0.00456531	0.011906	None	None	2.34053
MINDY1	3.55411	0.000190535	0.000700004	None	None	3.72002
PRUNE1	0.0414886	0.84473	0.90031	None	None	0.073282
BNIPL	0.9962	0.043229	0.0813884	None	None	1.36423
C1orf56	1.67709	0.1192	0.18978	None	None	0.923723
CDC42SE1	-0.384421	0.000498223	0.00166988	None	None	3.30258
MLLT11	3.37029	0.00984629	0.0231553	None	intrinsic apoptotic signaling pathway in response to DNA damage	2.00673
GABPB2	-2.47489	3.28052e-14	8.60968e-13	None	None	13.4841
SEMA6C	-2.6931	0.0949118	0.157217	mesenchyme development	None	1.02268
SCNM1	1.14182	9.20764e-06	4.51094e-05	None	None	5.03585
LYSMD1	-0.364245	0.0812936	0.137849	None	None	1.08994
VPS72	-0.286318	0.114818	0.183979	None	None	0.939991
PIP5K1A	-0.161981	0.517051	0.622193	None	None	0.286466
PSMD4	0.329841	0.0303646	0.060702	None	None	1.51763
ZNF687-AS1	8.33954	6.37453e-11	8.9791e-10	None	None	10.1956
ZNF687	0.391288	0.139086	0.2158	None	None	0.856717
PI4KB	-0.159476	0.185646	0.273381	None	None	0.731315
RFX5	2.06451	0.217767	0.3112	None	None	0.662008
SELENBP1	-9.84934	1.01277e-05	4.92022e-05	None	None	4.99449
PSMB4	0.651759	0.0576896	0.103631	None	None	1.2389
POGZ	-1.28954	5.14539e-08	3.87115e-07	None	None	7.28858
CGN	0.116459	0.883734	0.928654	None	None	0.0536783
TUFT1	-0.755902	0.0512032	0.0939313	None	None	1.2907
AL365436.2	5.89578	3.06958e-08	2.41947e-07	None	None	7.51292
SNX27	0.67086	5.80534e-05	0.000241607	None	None	4.23617
AL391335.1	7.30521	1.84039e-08	1.51017e-07	None	None	7.73509
AL589765.1	0	1	NA	None	None	0
RIIAD1	NA	NA	NA	None	None	NA
MRPL9	0.376198	0.0724547	0.125184	None	None	1.13993
OAZ3	0.570157	0.795672	0.86492	None	None	0.0992658
AL589765.4	0	1	NA	None	None	0
TDRKH	1.97176	1.18361e-10	1.54684e-09	None	None	9.92679
TDRKH-AS1	3.66689	0.0119165	0.0273107	None	None	1.92385
RORC	1.74298	0.239396	0.335977	None	None	0.620884
C2CD4D	5.83822	0.0638436	0.112733	None	None	1.19488
C2CD4D-AS1	1.92241	0.264784	0.36483	None	None	0.577108
THEM5	10.5928	9.1792e-10	9.94932e-09	None	None	9.0372
THEM4	0.479169	0.153666	0.234366	None	None	0.813422
AL450992.3	0	1	NA	None	None	0
S100A10	1.52507	0.015175	0.0337456	None	None	1.81887
AL450992.1	8.6799	2.33417e-11	3.55405e-10	None	None	10.6319
S100A11	1.5372	7.78976e-08	5.65871e-07	None	None	7.10848
TCHHL1	-1.2408	0.756942	NA	None	None	0.120937
TCHH	-1.74658	0.0192408	0.0412994	None	None	1.71578
FLG-AS1	1.37342	0.516322	0.621471	None	None	0.28708
CRCT1	3.31036	0.39776	0.506338	None	None	0.400379
IVL	NA	NA	NA	None	None	NA
AL161636.1	NA	NA	NA	None	None	NA
PGLYRP4	2.85512	0.249643	NA	None	carbohydrate derivative catabolic process	0.602681
S100A9	1.44637	0.00155531	0.00459551	None	intrinsic apoptotic signaling pathway in response to DNA damage	2.80818
S100A8	0	1	NA	None	None	0
S100A6	1.64895	2.8807e-06	1.55636e-05	None	None	5.5405
S100A4	2.23965	0.0454754	0.0849013	None	None	1.34222
S100A2	NA	NA	NA	None	None	NA
BX470102.2	0.401726	0.855554	0.908597	None	None	0.0677523
S100A16	7.29549	0.00206627	0.00590073	None	None	2.68481
S100A13	-0.756992	0.080937	0.13739	None	None	1.09185
AL162258.2	-0.140159	0.862583	0.913684	None	None	0.0641992
CHTOP	-0.154811	0.194506	0.284052	None	None	0.711068
SNAPIN	1.23288	0.0150121	0.0334542	None	None	1.82356
ILF2	-0.0889751	0.652435	0.743288	None	None	0.185463
NPR1	0.172303	0.820921	0.883902	None	None	0.0856988
INTS3	-1.13885	6.10921e-05	0.000253307	None	None	4.21401
SLC27A3	-2.4399	0.0615983	0.109382	None	None	1.21043
GATAD2B	-0.526345	4.03958e-11	5.92051e-10	None	None	10.3937
AL358472.5	0.647376	0.708911	0.792753	None	None	0.149408
DENND4B	-1.67492	1.96443e-12	3.72775e-11	None	None	11.7068
CRTC2	-0.54585	0.0260733	0.053345	None	None	1.5838
SLC39A1	0.759708	0.0134537	0.0303873	None	None	1.87116
AL358472.4	5.11836	3.38005e-06	1.79833e-05	None	None	5.47108
AL358472.3	1.33896	0.635193	NA	None	None	0.197094
CREB3L4	-0.895451	0.138723	0.215359	None	None	0.857851
JTB	0.379267	0.0101032	0.0236695	None	None	1.99554
AL358472.2	0.30472	0.944662	NA	None	None	0.0247235
RAB13	0.577475	0.00656311	0.0163312	None	None	2.18289
RPS27	3.00255	NA	NA	None	ribosome biogenesis	NA
NUP210L	2.47878	4.83687e-10	5.5733e-09	None	None	9.31544
TPM3	0.747276	2.13095e-07	1.42845e-06	None	None	6.67143
C1orf189	1.26713	0.458498	0.566237	None	None	0.338663
C1orf43	-0.0890049	0.555089	0.656449	None	None	0.255637
UBAP2L	-0.567353	2.89979e-05	0.000128481	None	None	4.53763
HAX1	0.418281	0.105353	0.171447	None	None	0.977355
ATP8B2	-2.04074	0.15555	0.236787	None	None	0.80813
IL6R-AS1	0	1	1	None	None	0
IL6R	-0.959039	0.456642	0.564476	None	None	0.340424
SHE	-3.19497	0.169062	0.253384	None	None	0.771953
TDRD10	-2.22345	0.490925	0.597349	None	None	0.308985
UBE2Q1	-0.634313	0.0184445	0.0398982	None	None	1.73413
ADAR	-0.033437	0.910984	0.948649	None	None	0.0404894
KCNN3	0.516896	0.768092	0.842722	None	None	0.114587
PMVK	1.34541	2.69634e-12	5.00768e-11	None	None	11.5692
AL451085.1	1.20029	0.694413	0.779721	None	None	0.158382
PBXIP1	1.75246	8.58715e-07	5.14187e-06	None	None	6.06615
PYGO2	1.00555	1.84907e-08	1.516e-07	None	None	7.73305
AL451085.2	2.26965	0.44906	0.556831	None	None	0.347696
SHC1	0.435544	0.412022	0.520666	None	None	0.385079
CKS1B	1.18848	0.00197216	0.00567084	None	None	2.70506
FLAD1	0.864142	3.29044e-05	0.000144225	None	None	4.48275
ZBTB7B	0.826972	3.72672e-05	0.000161576	None	None	4.42867
DCST2	0.907789	0.3831	0.491098	None	None	0.416688
DCST1	2.43638	0.251473	0.349425	None	None	0.599509
ADAM15	2.25688	3.70791e-13	8.19542e-12	None	None	12.4309
EFNA4	2.16567	NA	NA	None	None	NA
EFNA1	-0.83499	0.0559647	0.101034	None	None	1.25209
SLC50A1	0.865134	0.000803303	0.00255924	None	None	3.09512
DPM3	1.80959	0.0331	0.0651374	None	None	1.48017
KRTCAP2	2.40893	0.0303652	0.060702	None	None	1.51762
TRIM46	8.42249	8.39042e-09	7.41456e-08	None	None	8.07622
MUC1	0	1	1	None	None	0
AC234582.1	4.3387	NA	NA	None	None	NA
THBS3	-0.503004	0.115793	0.185216	None	None	0.936318
MTX1	1.2644	4.15935e-05	0.000178797	None	None	4.38097
GBA	1.25224	0.000292689	0.00102791	None	None	3.53359
FAM189B	0.531488	0.0112967	0.0261023	None	None	1.94705
SCAMP3	1.26409	1.99066e-07	1.34191e-06	None	None	6.701
CLK2	-0.303451	0.0429055	0.0809144	None	None	1.36749
HCN3	1.67187	0.481645	0.588295	None	None	0.317273
PKLR	-3.70276	0.249657	NA	None	None	0.602656
FDPS	1.77507	2.63933e-05	0.000118114	None	None	4.57851
RUSC1-AS1	1.85742	0.156211	0.237623	None	None	0.806289
RUSC1	0.338523	0.277515	0.379022	None	None	0.556714
ASH1L	-0.0878662	0.414058	0.522784	None	None	0.382939
ASH1L-IT1	-0.299861	0.945757	NA	None	None	0.0242206
ASH1L-AS1	2.16107	0.062309	0.110429	None	None	1.20545
MSTO1	1.38277	0.080114	0.136209	None	None	1.09629
AL353807.5	7.76444	1.0399e-05	5.03775e-05	None	None	4.98301
YY1AP1	0.420123	0.00409747	0.0108233	None	None	2.38748
DAP3	1.35505	5.08641e-06	2.6246e-05	None	None	5.29359
GON4L	-0.175036	0.255659	0.354318	None	None	0.592338
SYT11	0	1	NA	None	None	0
RIT1	-0.512843	0.0145791	0.0325953	None	None	1.83627
KHDC4	-0.342734	0.030559	0.061013	None	None	1.51486
ARHGEF2	-1.34016	2.98508e-08	2.35674e-07	None	None	7.52504
AL355388.2	-2.75122	0.317809	0.423061	None	None	0.497834
AL355388.1	NA	NA	NA	None	None	NA
AL355388.3	8.77323	4.83171e-10	5.57222e-09	None	None	9.3159
SSR2	1.54075	1.11678e-06	6.54412e-06	None	None	5.95203
UBQLN4	0.212145	0.417886	0.526232	None	None	0.378942
LAMTOR2	0.911541	0.000234007	0.000841819	None	None	3.63077
RAB25	1.96457	7.2496e-16	2.5015e-14	None	None	15.1397
MEX3A	-3.21191	0.0516377	0.0945567	None	None	1.28703
LMNA	0.587648	0.0194252	0.0416302	None	None	1.71163
SEMA4A	-4.83075	1.8525e-12	3.53633e-11	mesenchyme development	None	11.7322
SLC25A44	1.5417	5.98415e-12	1.03165e-10	None	None	11.223
PMF1	0.975702	NA	NA	None	None	NA
BGLAP	-2.15667	0.217713	0.311147	None	None	0.662115
PAQR6	-3.40044	0.0201911	0.0429738	None	None	1.69484
SMG5	0.208785	0.39306	0.501553	None	None	0.405541
TMEM79	0.5165	0.000692052	0.0022416	None	None	3.15986
GLMP	1.69195	8.23241e-17	3.2431e-15	None	None	16.0845
CCT3	0.307553	0.0139405	0.0313429	None	None	1.85572
TSACC	1.3331	0.000640206	0.00209133	None	None	3.19368
C1orf61	-0.849962	0.212745	0.305229	None	None	0.67214
MEF2D	-0.915906	6.41225e-11	9.01899e-10	None	None	10.193
AL365181.1	NA	NA	NA	None	None	NA
IQGAP3	-1.34111	0.0879107	0.14726	None	None	1.05596
NAXE	1.81816	0.0090908	0.0215957	None	None	2.0414
GPATCH4	1.76692	6.70419e-15	1.96067e-13	None	None	14.1737
NES	-8.604	7.44613e-06	3.70953e-05	None	None	5.12807
AL590666.3	NA	NA	NA	None	None	NA
CRABP2	1.54256	0.603364	NA	None	None	0.21942
AL590666.1	NA	NA	NA	None	None	NA
ISG20L2	1.2585	1.65758e-11	2.60021e-10	None	ribosome biogenesis	10.7805
RRNAD1	-0.609817	6.49021e-05	0.000267084	None	None	4.18774
MRPL24	1.13995	0.0848909	0.142925	None	None	1.07114
HDGF	0.47894	0.0120264	0.0275363	None	None	1.91986
PRCC	-0.171503	0.129516	0.203502	None	None	0.887678
SH2D2A	0	1	NA	None	None	0
NTRK1	0.30473	0.94466	NA	None	None	0.0247243
INSRR	NA	NA	NA	None	None	NA
PEAR1	-8.30914	1.9882e-05	9.11438e-05	None	None	4.70154
LRRC71	NA	NA	NA	None	None	NA
ARHGEF11	-1.27837	1.49214e-05	6.99407e-05	None	None	4.82619
ETV3L	0	1	NA	None	None	0
ETV3	1.36645	2.82723e-13	6.40382e-12	None	None	12.5486
LINC02772	0	1	NA	None	None	0
FCRL5	0	1	NA	None	None	0
FCRL3	0	1	NA	None	None	0
FCRL2	0	1	NA	None	None	0
FCRL1	-2.22344	0.613921	0.709651	None	None	0.211888
CD5L	-2.22339	0.61393	NA	None	None	0.211881
KIRREL1	-10.8656	6.7513e-16	2.34644e-14	None	None	15.1706
CD1D	NA	NA	NA	None	None	NA
AL138899.1	NA	NA	NA	None	None	NA
OR10K1	NA	NA	NA	None	None	NA
SPTA1	-12.1996	1.77414e-16	6.82101e-15	None	None	15.751
MNDA	0	1	NA	None	None	0
PYHIN1	-6.93818	0.0141014	0.031649	None	None	1.85074
IFI16	-2.63129	8.44993e-08	6.11051e-07	None	None	7.07315
AIM2	-6.98165	0.100881	NA	None	None	0.996192
CADM3	-7.02094	0.0989596	0.162713	None	None	1.00454
CADM3-AS1	0	1	NA	None	None	0
ACKR1	-2.22339	0.61393	NA	None	None	0.211881
AL513323.1	-2.22342	0.613924	NA	None	None	0.211885
DUSP23	-0.299927	0.945745	0.969341	None	None	0.0242261
FCRL6	0	1	NA	None	None	0
SLAMF8	NA	NA	NA	None	None	NA
AL590560.2	NA	NA	NA	None	None	NA
VSIG8	NA	NA	NA	None	None	NA
AL590560.3	0	1	NA	None	None	0
CFAP45	0.921699	0.509306	0.614879	None	None	0.293021
TAGLN2	-0.346034	0.522054	0.62668	None	None	0.282285
IGSF9	-2.22342	0.613924	NA	None	None	0.211886
LINC01133	-0.299892	0.944396	NA	None	None	0.0248457
KCNJ10	0.304726	0.944661	NA	None	None	0.024724
PIGM	6.16386	0.000168018	0.000627491	None	None	3.77464
IGSF8	-0.0486686	0.950917	0.973341	None	None	0.0218575
ATP1A2	-4.25501	0.322732	NA	None	None	0.491158
ATP1A4	-1.59797	0.490957	0.59735	None	None	0.308956
CASQ1	-7.71995	0.00113008	0.00346113	None	None	2.94689
AL121987.2	-0.943827	0.618654	0.713746	None	None	0.208552
PEA15	0.200309	0.312028	0.416696	None	None	0.505807
DCAF8	0.458912	0.328125	0.434083	None	None	0.483961
AL139011.1	-0.299908	0.938784	NA	None	None	0.0274345
PEX19	1.60206	0.283258	0.385173	None	None	0.547818
COPA	-0.498195	0.000590078	0.00194458	None	None	3.22909
NCSTN	0.421605	0.0545145	0.0987946	None	None	1.26349
NHLH1	0	1	NA	None	None	0
VANGL2	0	1	NA	None	None	0
SLAMF6	0	1	NA	None	None	0
CD84	0	1	1	None	None	0
SLAMF1	0	1	NA	None	None	0
AL121985.1	-2.91372	0.506435	NA	None	None	0.295477
CD48	0	1	NA	None	None	0
SLAMF7	0	1	NA	None	None	0
LY9	0	1	NA	None	None	0
CD244	0	1	NA	None	None	0
F11R	2.3756	0.000127313	0.000491054	None	None	3.89513
TSTD1	4.12206	0.012791	0.0290855	None	None	1.8931
USF1	0.482315	0.130254	0.204511	None	None	0.885209
ARHGAP30	-1.07338	0.0395631	0.0756974	None	None	1.40271
NECTIN4	-2.33124	6.87018e-11	9.59276e-10	None	None	10.163
AL591806.1	-2.22347	0.343032	0.449557	None	None	0.464666
KLHDC9	-0.299894	0.920433	0.955309	None	None	0.0360077
PFDN2	0.767765	0.000386069	0.00132642	None	None	3.41334
NIT1	-0.768832	0.00878094	0.0209687	None	None	2.05646
DEDD	-0.567678	0.000152969	0.000576904	None	None	3.8154
UFC1	1.10227	1.21176e-06	7.03619e-06	None	None	5.91658
AL590714.1	8.04342	3.32029e-05	0.0001454	None	None	4.47882
USP21	-0.456242	0.015899	0.0351247	None	None	1.79863
PPOX	0.0813418	0.719139	0.801666	None	None	0.143187
B4GALT3	0.603193	0.000162492	0.000608632	None	None	3.78917
ADAMTS4	0	1	NA	None	None	0
NDUFS2	0.193999	0.478463	0.585452	None	None	0.320152
FCER1G	0	1	NA	None	None	0
TOMM40L	0.381116	0.827904	0.888528	None	None	0.0820203
NR1I3	3.62837	0.205854	0.297388	None	None	0.68644
PCP4L1	0.0850257	0.871477	0.920148	None	None	0.0597442
MPZ	0.122896	0.945396	0.969341	None	None	0.0243861
SDHC	-0.0696502	0.712822	0.796383	None	None	0.147019
AL592295.4	-4.27062	1.04322e-05	5.05026e-05	None	None	4.98162
AL592295.5	-0.384492	0.878781	0.924848	None	None	0.0561193
AL592295.3	3.02153	0.106968	0.173649	None	None	0.970744
FCGR2A	-10.0502	1.19457e-11	1.93563e-10	None	None	10.9228
HSPA6	3.77487	0.375642	NA	None	None	0.425226
FCGR3A	-10.7077	8.39828e-11	1.14514e-09	None	None	10.0758
FCGR3B	-13.3887	4.92444e-21	3.59222e-19	None	None	20.3076
FCGR2B	-10.6009	1.16957e-11	1.89833e-10	None	None	10.932
DUSP12	-0.371892	0.044677	0.0836387	None	None	1.34992
ATF6	-0.583981	0.0117618	0.0270109	None	None	1.92953
OLFML2B	-6.97217	0.0547789	0.0992195	extracellular matrix organization	None	1.26139
NOS1AP	2.32977	1.05737e-07	7.45523e-07	None	None	6.97577
C1orf226	1.35811	0.48171	0.588338	None	None	0.317214
SH2D1B	0	1	NA	None	None	0
UHMK1	0.165141	0.492095	0.598355	None	None	0.307951
UAP1	0.0920149	0.664363	0.754011	None	None	0.177595
AL596325.2	0	1	NA	None	None	0
DDR2	0.182922	0.583621	0.682314	None	None	0.233869
HSD17B7	2.92608	2.47845e-07	1.63906e-06	None	None	6.60582
RGS5	-0.128592	0.810991	0.875968	None	None	0.090984
AL499616.1	6.46561	3.24453e-05	0.000142538	None	None	4.48885
AL592435.1	4.39021	0.0438068	0.0823229	None	None	1.35846
NUF2	0.190052	0.709427	0.793191	None	None	0.149092
PBX1	-1.06683	0.00451517	0.0117919	None	None	2.34533
AL391001.1	-1.26164	0.77468	NA	None	None	0.110878
AL357568.2	4.69167	NA	NA	None	None	NA
LRRC52-AS1	0	1	NA	None	None	0
LRRC52	-2.9137	0.506438	NA	None	None	0.295474
AL356441.1	3.07044	0.137572	0.213969	None	None	0.861471
MGST3	-0.00461552	0.967965	0.985795	None	None	0.0141403
ALDH9A1	0.900154	0.000353642	0.00122289	None	None	3.45144
TMCO1	0.577167	0.017041	0.0372912	None	None	1.7685
TMCO1-AS1	4.62488	0.0203913	0.043323	None	None	1.69056
UCK2	-0.189036	0.704641	0.789127	None	None	0.152032
AL358115.1	9.35298	1.08367e-11	1.77998e-10	None	None	10.9651
FAM78B	NA	NA	NA	None	None	NA
AL596087.2	NA	NA	NA	None	None	NA
POGK	-0.753427	1.69233e-05	7.84048e-05	None	None	4.77151
TADA1	-0.149248	0.609056	0.705609	None	None	0.215342
ILDR2	-2.20669	0.00375055	0.0100131	None	None	2.42591
MAEL	-9.54848	2.5829e-17	1.06566e-15	None	None	16.5879
GPA33	3.58323	0.000188236	0.000693016	None	None	3.7253
DUSP27	1.20304	0.304628	0.408435	None	None	0.51623
LINC01363	-3.95164	0.287614	NA	None	None	0.541191
AL451050.2	-1.11299	0.000134591	0.000515496	None	None	3.87099
POU2F1	-0.858416	1.11225e-06	6.52153e-06	None	None	5.9538
AL136984.1	-2.70245	0.264713	0.364758	None	None	0.577224
CD247	-0.216225	0.821585	0.884221	None	None	0.0853473
CREG1	-0.189408	0.63427	0.7273	None	None	0.197726
RCSD1	-5.75377	1.69533e-11	2.65509e-10	None	None	10.7707
MPZL1	1.94108	4.62786e-11	6.72108e-10	None	None	10.3346
ADCY10	2.45665	8.56257e-11	1.16423e-09	None	intrinsic apoptotic signaling pathway in response to DNA damage	10.0674
MPC2	1.1819	6.36863e-06	3.22296e-05	None	None	5.19595
DCAF6	0.0523611	0.866678	0.916706	None	None	0.0621422
GPR161	-2.55051	0.0494169	0.0911687	None	None	1.30612
TIPRL	-0.121606	0.528154	0.63246	None	None	0.277239
SFT2D2	1.08675	7.75921e-11	1.06481e-09	None	None	10.1102
TBX19	0.538021	0.102739	0.167778	None	None	0.988263
AL023755.1	3.11744	2.39015e-06	1.31127e-05	None	None	5.62157
XCL2	NA	NA	NA	None	None	NA
XCL1	-5.99929	0.00573238	0.0144743	None	None	2.24167
DPT	-2.2234	0.613928	NA	extracellular matrix organization	None	0.211882
LINC00970	1.20612	0.533282	0.637147	None	None	0.273043
ATP1B1	5.96398	4.95738e-22	4.09946e-20	None	None	21.3047
NME7	1.92212	0.0129458	0.0293957	None	None	1.88787
BLZF1	-0.893085	1.51462e-06	8.62514e-06	None	None	5.81969
CCDC181	-0.495957	0.274567	0.375852	None	None	0.561351
SLC19A2	-0.0899464	0.695291	0.78057	None	None	0.157833
Z99572.1	0.585945	0.725437	0.807233	None	None	0.139401
F5	-3.25678	1.03987e-05	5.03775e-05	None	None	4.98302
SELP	-5.5477	0.00660109	0.016415	None	None	2.18038
C1orf112	-0.033631	0.880652	0.926379	None	None	0.0551958
SELL	-5.33781	0.174114	0.259729	None	None	0.759167
SELE	NA	NA	NA	None	None	NA
METTL18	1.717	0.228075	0.322925	None	ribosome biogenesis	0.641921
SCYL3	0.133287	0.26853	0.368878	None	None	0.571008
KIFAP3	-0.703531	0.0447023	0.0836778	None	None	1.34967
LINC01681	-2.22345	0.40978	0.518506	None	None	0.387449
GORAB-AS1	0	1	NA	None	None	0
GORAB	-0.632111	0.0258354	0.0529487	None	None	1.58778
AL023495.1	-1.95752	0.617136	NA	None	None	0.209619
PRRX1	-3.55492	0.412449	NA	connective tissue development	None	0.384629
Z97200.1	NA	NA	NA	None	None	NA
BX284613.2	0.200532	0.902995	0.942955	None	None	0.0443146
MROH9	5.12722	0.00131182	0.00395091	None	None	2.88213
FMO1	1.36266	0.301162	0.404522	None	None	0.5212
FMO4	-1.49294	0.00524414	0.0133913	None	None	2.28033
PRRC2C	0.142272	0.396034	0.504577	None	None	0.402267
MYOCOS	2.42648	0.0573026	0.103042	None	None	1.24183
VAMP4	-0.6459	0.0199216	0.042504	None	None	1.70068
EEF1AKNMT	2.88622	NA	NA	None	None	NA
DNM3	-0.598506	0.220101	0.313765	None	None	0.657377
DNM3OS	-10.8656	2.92354e-11	4.37847e-10	None	None	10.5341
PIGC	-0.567868	0.0854402	0.143799	None	None	1.06834
C1orf105	3.07839	0.167386	0.25155	None	None	0.776282
SUCO	-0.653815	0.00894291	0.0213051	None	None	2.04852
FASLG	NA	NA	NA	None	None	NA
AL031599.1	4.12045	8.81177e-07	5.25665e-06	None	None	6.05494
Z97198.1	NA	NA	NA	None	None	NA
TNFSF4	-0.214356	0.942131	NA	None	None	0.0258888
AL645568.1	1.1555	9.44776e-08	6.74675e-07	None	None	7.02467
PRDX6	0.372254	0.0290275	0.0584112	None	None	1.53719
SLC9C2	2.46744	0.180787	NA	None	None	0.742832
AL139142.1	0	1	NA	None	None	0
ANKRD45	3.84376	0.267669	NA	None	None	0.572402
KLHL20	-0.660681	0.0345545	0.0676802	None	None	1.4615
CENPL	1.1681	7.43861e-05	0.000302607	None	None	4.12851
DARS2	0.476276	0.0563886	0.101722	None	None	1.24881
GAS5	3.2189	0.0867841	0.14578	None	None	1.06156
GAS5-AS1	2.70387	0.236336	0.332388	None	None	0.62647
ZBTB37	-0.944937	0.00219414	0.00622792	None	None	2.65874
SERPINC1	NA	NA	NA	None	None	NA
RC3H1	0.2592	0.0172382	0.0376454	None	None	1.76351
RC3H1-IT1	1.53563	0.569975	0.669584	None	None	0.244144
RABGAP1L-DT	1.65296	0.701106	NA	None	None	0.154216
RABGAP1L	-0.411347	0.0114068	0.0263039	None	None	1.94284
GPR52	-0.299878	0.945754	NA	None	None	0.024222
RABGAP1L-IT1	3.67113	0.389019	NA	None	None	0.41003
Z99127.1	2.63816	0.00150237	0.00446106	None	None	2.82322
Z99127.4	8.38597	3.75412e-12	6.78181e-11	None	None	11.4255
CACYBP	0.993711	0.000229473	0.000827061	None	None	3.63927
MRPS14	0.611889	0.000607006	0.00199262	None	None	3.21681
TNN	0.480842	0.912576	NA	None	None	0.0397311
KIAA0040	0.366892	0.0986672	0.16233	None	None	1.00583
Z94057.1	-8.32137	1.04493e-05	5.056e-05	None	None	4.98091
TNR	-0.617296	0.606871	0.703748	None	None	0.216904
LINC02803	2.39572	0.0999322	0.163877	None	None	1.00029
COP1	-0.159641	0.186003	0.273823	None	None	0.730481
AL591043.2	2.48595	0.065442	0.115099	None	None	1.18414
PAPPA2	-6.22789	1.79711e-30	3.9179e-28	None	None	29.7454
AL031290.1	-4.94904	0.247738	NA	None	None	0.606007
ASTN1	-3.3583	0.108116	NA	None	None	0.96611
BRINP2	-3.09053	0.214429	NA	None	None	0.668717
LINC01645	-3.32945	0.322954	NA	None	None	0.49086
AL136114.1	1.42702	0.518041	0.623064	None	None	0.285636
SEC16B	-4.15006	0.0256236	0.0525763	None	None	1.59136
RASAL2-AS1	4.14902	1.03198e-05	5.00468e-05	None	None	4.98633
RASAL2	0.769398	0.00265033	0.00738224	None	None	2.5767
TEX35	4.02034	0.345149	NA	None	None	0.461994
C1orf220	0	1	NA	None	None	0
RALGPS2	-0.677594	0.00724621	0.0178092	None	None	2.13989
ANGPTL1	7.89321	6.52903e-10	7.28676e-09	None	None	9.18515
FAM20B	-0.186127	0.437137	0.545213	None	None	0.359383
TOR3A	0.807427	0.178038	0.264248	None	None	0.749487
ABL2	0.525499	0.0042245	0.011113	None	None	2.37422
SOAT1	-0.369609	0.158475	0.240419	None	None	0.800039
AXDND1	2.29841	0.0794335	0.135328	None	None	1.1
TDRD5	5.22455	0.00527435	0.0134505	None	None	2.27783
FAM163A	0.120304	0.871989	0.920496	None	None	0.0594892
LINC02818	1.80908	0.283898	0.385873	None	None	0.546837
TOR1AIP2	0.0586361	0.768328	0.842837	None	None	0.114453
AL353708.3	6.28542	2.32447e-12	4.36778e-11	None	None	11.6337
TOR1AIP1	0.32086	0.15675	0.238273	None	None	0.804794
AL353708.1	NA	NA	NA	None	None	NA
CEP350	-0.257966	0.138253	0.214836	None	None	0.859325
QSOX1	0.980051	0.0431973	0.0813367	None	None	1.36454
LHX4	2.74197	1.89866e-07	1.28577e-06	None	None	6.72155
ACBD6	0.337211	0.231	0.326295	None	None	0.636388
XPR1	0.278891	0.0776392	0.132831	None	None	1.10992
KIAA1614	1.03236	0.148398	0.227631	None	None	0.828573
AL162431.1	2.94499	0.0252888	0.0520061	None	None	1.59707
KIAA1614-AS1	1.58718	0.685603	0.772179	None	None	0.163927
STX6	1.37788	6.52717e-11	9.14709e-10	None	None	10.1853
MR1	2.55219	7.57379e-06	3.76823e-05	None	None	5.12069
IER5	1.92026	4.06044e-10	4.74708e-09	None	None	9.39143
LINC01732	4.93819	0.00414095	0.0109127	None	None	2.3829
CACNA1E	4.81293	0.00430224	0.0112929	None	None	2.36631
AL161734.2	NA	NA	NA	None	None	NA
AL355482.2	NA	NA	NA	None	None	NA
LINC01344	-0.396029	0.799258	0.867696	None	None	0.0973128
GLUL	0.421468	0.334007	0.440173	None	None	0.476245
RGSL1	0	1	NA	None	None	0
RNASEL	-0.0678098	0.956788	0.977734	None	None	0.0191844
RGS16	-1.44903	4.03657e-05	0.000173948	None	None	4.39399
NPL	-0.890858	0.148962	0.22839	None	None	0.826924
AL355999.1	6.53892	1.66764e-07	1.13978e-06	None	None	6.7779
DHX9	0.40163	0.00407518	0.0107717	None	None	2.38985
SHCBP1L	9.17586	5.14289e-12	8.96988e-11	None	None	11.2888
LAMC1	0.13651	0.758641	0.834262	None	None	0.119964
LAMC2	1.42196	0.100692	0.164912	None	None	0.997005
NMNAT2	-0.376437	0.523158	0.62781	None	None	0.281367
AL354953.1	0	1	NA	None	None	0
SMG7-AS1	7.56161	9.22481e-08	6.60716e-07	None	None	7.03504
SMG7	0.315875	0.147902	0.227	None	None	0.830027
NCF2	2.77876	0.0224201	0.0469112	None	None	1.64936
AL137800.1	NA	NA	NA	None	None	NA
ARPC5	0.921498	0.0161142	0.0355672	None	None	1.79279
RGL1	-0.528359	0.38051	0.488431	None	None	0.419634
COLGALT2	-1.26167	0.70413	NA	extracellular matrix organization	None	0.152347
TSEN15	0.337994	0.226755	0.321463	None	None	0.644442
AL158011.1	7.91435	6.66991e-06	3.363e-05	None	None	5.17588
AL445228.2	5.7703	0.00296504	0.00816364	None	None	2.52797
C1orf21	2.37738	5.29237e-33	1.37208e-30	None	None	32.2764
AL078645.1	1.88564	0.66084	NA	None	None	0.179904
AL713852.1	2.11561	0.221525	0.315443	None	None	0.654577
EDEM3	-0.480087	0.00640165	0.0159729	None	None	2.19371
NIBAN1	1.6177	0.234399	0.330221	None	None	0.630044
LINC01633	-6.68058	0.116619	NA	None	None	0.93323
RNF2	-0.0581931	0.708691	0.792599	None	None	0.149543
TRMT1L	-1.01612	5.12053e-05	0.000215386	None	None	4.29068
SWT1	-0.788632	2.34582e-09	2.31624e-08	None	None	8.62971
IVNS1ABP	-1.46931	8.89867e-08	6.39883e-07	None	None	7.05068
AL078644.2	0	1	NA	None	None	0
LINC01350	-3.47727	0.42326	NA	None	None	0.373392
AL133383.1	0	1	1	None	None	0
HMCN1	-9.18704	1.29567e-16	5.01156e-15	extracellular matrix organization	None	15.8875
PRG4	1.62578	0.473131	0.580298	None	None	0.325018
TPR	-0.0697446	0.629681	0.723066	None	None	0.200879
ODR4	0.312941	0.0327738	0.0646014	None	None	1.48447
AL096803.2	3.90174	0.0038585	0.0102628	None	None	2.41358
PLA2G4A	5.79389	0.016068	0.0354695	None	None	1.79404
ERVMER61-1	0.7752	0.164068	0.247397	None	None	0.784977
AL136372.2	-22.3102	3.31258e-11	4.93415e-10	None	None	10.4798
LINC01701	NA	NA	NA	None	None	NA
BRINP3	3.54551	0.180988	0.26788	None	None	0.742349
AL354771.1	0	1	NA	None	None	0
AL138927.1	1.55683	0.684259	NA	None	None	0.16478
LINC02770	-5.6531	0.0634552	NA	None	None	1.19753
RGS18	0	1	NA	None	None	0
AL390957.1	-0.0959596	0.813754	0.878157	None	None	0.0895069
RGS1	0	1	NA	None	None	0
RGS2	4.35969	2.09903e-08	1.70274e-07	None	None	7.67798
UCHL5	-0.196931	0.323683	0.429273	None	None	0.48988
RO60	1.58698	NA	NA	None	None	NA
GLRX2	1.04121	1.46759e-05	6.89415e-05	None	None	4.8334
CDC73	0.0082741	0.964951	0.983666	None	None	0.0154947
LINC01031	1.05462	0.0211203	0.0446149	None	None	1.6753
AL138778.1	1.58431	0.48839	NA	None	None	0.311233
AL136456.1	4.1706	0.00259857	0.00725352	None	None	2.58527
AL353072.2	8.20512	0.00250221	0.00700596	None	None	2.60168
AL353709.1	NA	NA	NA	None	None	NA
KCNT2	-2.22346	0.401558	0.510404	None	None	0.396252
CFH	0	1	1	None	None	0
ASPM	-0.532205	0.183538	0.270984	None	None	0.736275
ZBTB41	-1.70255	1.47744e-11	2.34448e-10	None	None	10.8305
CRB1	-6.75795	3.03534e-07	1.97534e-06	None	None	6.51779
DENND1B	-0.389466	0.260592	0.360062	None	None	0.584039
C1orf53	5.31555	0.0431802	0.0813126	None	None	1.36472
NEK7	-0.767144	0.000971686	0.00302797	None	None	3.01247
AL450352.1	0	1	NA	None	None	0
PTPRC	-2.15185	0.059714	0.106638	None	None	1.22392
AL157402.2	NA	NA	NA	None	None	NA
MIR181A1HG	0.263716	0.548102	0.650293	None	None	0.261138
LINC01222	-3.47724	0.423264	NA	None	None	0.373388
AC105941.1	0	1	NA	None	None	0
LINC02789	1.26597	0.731243	NA	None	None	0.135938
NR5A2	-0.812216	0.0738966	0.127308	None	None	1.13138
LINC00862	1.31467	0.000124429	0.000480993	None	None	3.90508
AC104461.1	4.28092	3.54007e-09	3.35058e-08	None	None	8.45099
ZNF281	1.25376	0.000120252	0.000466067	None	None	3.91991
AL359834.1	3.6422	0.249659	NA	None	None	0.602652
KIF14	-0.335391	0.355349	0.4621	None	None	0.449345
DDX59	-0.635237	0.000202168	0.000736536	None	None	3.69429
DDX59-AS1	6.51548	7.2458e-08	5.29161e-07	None	None	7.13991
CAMSAP2	-0.147484	0.437373	0.545366	None	None	0.359148
INAVA	0.941781	0.0650372	0.114555	None	None	1.18684
KIF21B	0	1	NA	None	None	0
TMEM9	1.18535	0.0424116	0.0801401	None	None	1.37251
PKP1	-3.18416	0.0746707	0.128449	None	None	1.12685
TNNT2	-1.01576	0.351941	0.458664	None	None	0.45353
LAD1	1.13097	0.000601988	0.00197963	None	None	3.22041
AC119427.1	0	1	NA	None	None	0
TNNI1	1.58303	0.713366	NA	None	None	0.146688
PHLDA3	1.58042	2.84215e-07	1.86352e-06	None	intrinsic apoptotic signaling pathway in response to DNA damage	6.54635
CSRP1	0.967022	0.00580936	0.014634	None	None	2.23587
AC096677.1	-1.98036	1.0154e-07	7.191e-07	None	None	6.99336
NAV1	-0.799492	0.0659758	0.11582	None	None	1.18062
IPO9-AS1	0.508412	0.162534	0.245451	None	None	0.789057
IPO9	0.141332	0.406462	0.51533	None	None	0.39098
SHISA4	1.06425	0.806117	NA	None	None	0.0936019
AL513217.1	0	1	NA	None	None	0
LMOD1	-3.35736	0.00187835	0.00542877	None	None	2.72622
TIMM17A	0.67036	0.00423333	0.0111316	None	None	2.37332
RNPEP	0.252218	0.103107	0.168178	None	None	0.986713
ELF3-AS1	1.50856	0.000146023	0.000553857	None	None	3.83558
ELF3	2.13986	4.52956e-08	3.43477e-07	None	None	7.34394
AL691482.3	NA	NA	NA	None	None	NA
GPR37L1	0.494854	0.870913	0.919703	None	None	0.0600253
ARL8A	-0.671411	0.00199171	0.00571551	None	None	2.70077
PTPN7	0.322988	0.925875	NA	None	None	0.0334477
LGR6	0	1	NA	None	None	0
UBE2T	0.361037	0.626855	0.72091	None	None	0.202833
PPP1R12B	0.0472131	0.78347	0.854901	None	None	0.105978
SYT2	2.52674	3.78871e-09	3.55957e-08	None	None	8.42151
AC104463.2	-0.299892	0.925012	NA	None	None	0.0338527
KDM5B	-0.195298	0.0962914	0.159158	None	None	1.01641
PCAT6	0.310919	0.742824	0.821283	None	None	0.129114
RABIF	1.76888	2.77238e-13	6.28701e-12	None	None	12.5571
KLHL12	-0.573252	0.0667396	0.11691	None	None	1.17562
ADIPOR1	0.918536	5.37083e-07	3.33785e-06	None	None	6.26996
CYB5R1	0.291707	0.237323	0.333531	None	None	0.624661
TMEM183A	0.896478	9.7658e-07	5.78083e-06	None	None	6.01029
PPFIA4	-0.735055	0.329337	0.435326	None	None	0.48236
ADORA1	-10.4533	1.26222e-43	8.64843e-41	None	None	42.8989
AC105940.2	0	1	NA	None	None	0
AC105940.1	NA	NA	NA	None	None	NA
MYBPH	-2.22342	0.613925	NA	None	None	0.211885
CHI3L1	-5.48281	0.199239	NA	connective tissue development	None	0.700626
CHIT1	-2.22339	0.61393	NA	None	None	0.211881
LINC01353	0	1	NA	None	None	0
LINC01136	1.82478	0.392239	NA	None	None	0.406449
BTG2	1.84242	4.5872e-05	0.000195394	None	None	4.33845
FMOD	-5.91801	0.165246	NA	extracellular matrix organization	None	0.78187
PRELP	5.5321	6.82908e-06	3.43333e-05	None	None	5.16564
OPTC	2.015	0.0916218	0.15265	None	None	1.038
ATP2B4	1.22079	3.80375e-05	0.000164506	None	None	4.41979
LAX1	3.07971	NA	NA	None	None	NA
ZC3H11A	2.31023	0.0934681	0.155133	None	None	1.02934
ZBED6	3.8822	0.00283452	0.00784369	None	None	2.54752
SNRPE	2.15719	1.02748e-13	2.50155e-12	None	None	12.9882
AL592146.2	2.68009	0.110739	0.17865	None	None	0.955698
SOX13	1.9145	3.17556e-35	1.14949e-32	None	None	34.4982
ETNK2	4.06029	0.000168433	0.000628919	None	None	3.77357
REN	-5.06924	4.95427e-06	2.56331e-05	None	None	5.30502
KISS1	-3.03247	3.8037e-05	0.000164506	None	None	4.41979
GOLT1A	-0.957516	0.0184231	0.0398609	None	None	1.73464
PLEKHA6	-0.528542	0.0240719	0.0498241	None	None	1.61849
AL592114.3	6.82849	0.0150841	0.0335795	None	None	1.82148
LINC00628	8.11644	0.00910416	0.0216221	None	None	2.04076
AL606489.1	3.88361	1.23599e-11	1.99768e-10	None	None	10.908
PPP1R15B	1.63975	1.26194e-05	5.99858e-05	None	None	4.89896
PIK3C2B	0.0949372	0.838709	0.896294	None	None	0.0763887
MDM4	-0.376764	0.000832253	0.00263826	None	None	3.07974
AL512306.3	0.797452	0.0159131	0.0351518	None	None	1.79824
LRRN2	1.31582	0.416047	0.524605	None	None	0.380857
AL512306.2	-2.59107	0.181255	0.268233	None	None	0.74171
NFASC	-8.28055	5.31457e-09	4.83911e-08	None	None	8.27453
CNTN2	4.35826	0.0127553	0.0290079	None	None	1.89431
TMEM81	-2.22345	0.612934	NA	None	None	0.212586
RBBP5	0.357572	0.16642	0.250394	None	None	0.778794
DSTYK	0.498971	0.0132046	0.0298916	None	None	1.87927
TMCC2	4.80731	0.0147592	0.0329556	None	None	1.83094
NUAK2	4.45828	2.96879e-06	1.60034e-05	None	None	5.52742
LEMD1	-0.965394	0.436755	0.544914	None	None	0.359762
BLACAT1	7.25353	1.37244e-08	1.15941e-07	None	None	7.86251
CDK18	-0.570983	0.379018	0.486971	None	None	0.42134
MFSD4A	5.33412	0.00235081	0.00661684	None	None	2.62878
ELK4	-0.133091	0.533297	0.637147	None	None	0.273031
SLC45A3	-2.2234	0.613928	NA	None	None	0.211882
NUCKS1	-0.260671	0.150332	0.230122	None	None	0.822949
RAB29	-0.241897	0.762445	0.83782	None	None	0.117791
SLC41A1	0.139932	0.699844	0.784634	None	None	0.154999
AC119673.2	-3.56729	0.0535179	0.0973675	None	None	1.2715
PM20D1	0	1	NA	None	None	0
RAB7B	2.14505	0.00131438	0.00395737	None	None	2.88128
RHEX	4.69365	0.00015973	0.000599106	None	None	3.79661
AC244035.1	NA	NA	NA	None	None	NA
FAM72A	2.1521	0.464183	NA	None	None	0.33331
SRGAP2	-0.498563	0.00992871	0.023312	None	None	2.00311
IKBKE	2.02629	0.0763893	0.131073	None	intrinsic apoptotic signaling pathway in response to DNA damage	1.11697
AC244034.2	NA	NA	NA	None	None	NA
RASSF5	7.7606	6.94485e-08	5.09133e-07	None	None	7.15834
EIF2D	0.463491	0.0211374	0.0446461	None	None	1.67495
DYRK3	-6.64996	0.118323	NA	None	None	0.92693
MAPKAPK2	-0.282834	0.106519	0.173038	None	None	0.972571
IL10	NA	NA	NA	None	None	NA
IL19	0	1	NA	None	None	0
FCMR	0	1	NA	None	None	0
C1orf116	0.482325	0.907565	NA	None	None	0.0421224
PFKFB2	1.48911	0.00354261	0.00952023	None	None	2.45068
YOD1	2.08471	5.71061e-12	9.90579e-11	None	None	11.2433
C4BPB	5.59599	0.00606927	0.0152228	None	None	2.21686
C4BPA	NA	NA	NA	None	None	NA
CD55	1.51105	9.99029e-07	5.90098e-06	None	None	6.00042
CR2	0	1	NA	None	None	0
CR1	-2.99064	0.146113	0.22474	None	None	0.835311
CR1L	-0.23957	0.509283	0.614879	None	None	0.293041
CD46	1.21675	1.68474e-09	1.71971e-08	None	None	8.77347
MIR29B2CHG	-1.71529	3.2437e-09	3.09912e-08	None	None	8.48896
CD34	-8.94732	8.03736e-10	8.81628e-09	connective tissue development	None	9.09489
LINC02767	NA	NA	NA	None	None	NA
PLXNA2	0.989871	0.0346588	0.0678238	None	None	1.46019
AC092810.3	NA	NA	NA	None	None	NA
MIR205HG	1.54412	0.343661	0.450167	None	None	0.463869
AL023754.1	0	1	NA	None	None	0
LAMB3	5.54936	0.000892007	0.00280635	None	None	3.04963
HSD11B1-AS1	0.0912712	0.963738	0.983151	None	None	0.0160411
G0S2	3.12109	0.464679	NA	None	None	0.332847
HSD11B1	1.04749	0.521071	0.625892	None	None	0.283103
TRAF3IP3	2.34691	0.105497	0.171638	None	None	0.976762
C1orf74	1.34022	0.476547	0.583513	None	None	0.321894
IRF6	0.197734	0.286671	0.388843	None	None	0.542617
UTP25	0.500015	0.134097	0.209431	None	None	0.872581
SYT14	2.43925	0.436986	NA	None	None	0.359533
SERTAD4-AS1	-0.396504	0.802945	0.870557	None	None	0.0953142
SERTAD4	1.68157	2.02517e-05	9.25728e-05	None	None	4.69354
HHAT	-1.61359	0.000169449	0.000632468	None	None	3.77096
KCNH1	0.6213	0.727747	0.809053	None	None	0.138019
AC092017.4	0	1	NA	None	None	0
[truncated: 28,954 more rows]

## Sheet: STBinvsterm
gene name	log2FoldChange	pvalue	padj	Gotermterm	GotermSTBin	pvalue_transformed
AL627309.1	0	1	1	None	None	0
AL627309.5	-1.55124	NA	NA	None	None	NA
AP006222.2	-0.0121237	0.997565	NA	None	None	0.00105896
AL732372.1	0	NA	NA	None	None	NA
AC114498.1	-3.3165	0.0151196	0.0292705	None	None	1.82046
LINC01409	0.858613	0.592507	0.680688	None	None	0.227306
LINC01128	-0.369674	0.818419	0.880318	None	None	0.0870241
LINC00115	3.37649	0.00025181	0.000707542	None	None	3.59893
FAM41C	-5.794	0.174085	0.245003	None	None	0.759238
AL645608.6	NA	NA	NA	None	None	NA
NOC2L	2.69799	2.22628e-14	2.88114e-13	None	intrinsic apoptotic signaling pathway in response to DNA damage	13.6524
KLHL17	1.59106	0.299701	0.384323	None	None	0.523312
PLEKHN1	5.2251	2.84581e-09	1.74335e-08	None	None	8.54579
AL645608.7	0	1	1	None	None	0
HES4	6.8982	8.79217e-08	4.23692e-07	None	None	7.0559
ISG15	3.59737	4.92461e-06	1.82041e-05	None	None	5.30763
AGRN	6.86116	1.86065e-05	6.29093e-05	None	None	4.73034
RNF223	6.9975	5.87009e-05	0.000183545	None	None	4.23136
C1orf159	0.912086	0.00214153	0.00504226	None	None	2.66928
AL390719.3	9.11871	2.75754e-13	3.08464e-12	None	None	12.5595
TTLL10-AS1	NA	NA	NA	None	None	NA
TTLL10	NA	NA	NA	None	None	NA
TNFRSF18	NA	NA	NA	None	None	NA
TNFRSF4	NA	NA	NA	None	None	NA
SDF4	0.751599	0.000236219	0.000666247	None	None	3.62668
B3GALT6	5.10715	0.000909711	0.00229959	None	None	3.0411
C1QTNF12	6.06156	0.00209147	0.0049342	None	None	2.67955
AL162741.1	NA	NA	NA	None	None	NA
UBE2J2	-0.364127	0.121496	0.18119	None	None	0.915439
LINC01786	-2.71748	0.534744	NA	None	None	0.271854
SCNN1D	2.29794	0.50128	0.592979	None	None	0.29992
ACAP3	-1.31128	4.40579e-06	1.63795e-05	None	None	5.35598
PUSL1	8.51425	3.85494e-12	3.68361e-11	None	None	11.414
INTS11	-1.34284	1.34999e-05	4.66311e-05	None	None	4.86967
AL139287.1	NA	NA	NA	None	None	NA
CPTP	0.320115	0.829215	0.889932	None	None	0.0813329
TAS1R3	-0.00364205	0.999341	NA	None	None	0.000286434
DVL1	0.157801	0.568353	0.657367	None	None	0.245382
MXRA8	5.67732	0.000150723	0.000439715	None	None	3.82182
AURKAIP1	1.24811	4.93295e-05	0.000156233	None	None	4.30689
CCNL2	0.276591	0.305754	0.39084	None	None	0.514627
MRPL20-AS1	1.16616	0.464545	0.557122	None	None	0.332972
MRPL20	-0.227278	0.18628	0.259677	None	None	0.729834
AL391244.2	-1.35039	0.504585	0.596153	None	None	0.297065
ANKRD65	2.45132	0.283145	0.365937	None	None	0.547991
TMEM88B	NA	NA	NA	None	None	NA
LINC01770	-0.684116	0.821766	0.883304	None	None	0.0852517
VWA1	2.04333	1.10555e-11	9.94109e-11	None	None	10.9564
ATAD3C	-0.819542	0.242592	0.32322	None	None	0.615124
ATAD3B	-0.659018	0.00055786	0.00146673	None	None	3.25347
ATAD3A	-0.0136987	0.951401	0.992277	None	None	0.0216362
TMEM240	-1.14314	0.726798	0.801297	None	None	0.138586
SSU72	0.504042	0.0285426	0.0515103	None	None	1.54451
AL645728.1	8.44324	3.2266e-11	2.69204e-10	None	None	10.4913
AL691432.2	0.727318	0.360818	0.449048	None	None	0.442711
MIB2	0.956693	0.00205132	0.004848	None	None	2.68797
MMP23B	6.32267	0.00397481	0.00882298	None	None	2.40068
CDK11B	-0.247975	0.497273	0.589243	None	None	0.303405
FO704657.1	0.196138	NA	NA	None	None	NA
SLC35E2B	-0.791714	0.0284554	0.0513622	None	None	1.54583
CDK11A	0.850119	0.0192171	0.0361865	None	None	1.71631
SLC35E2A	-1.94489	0.00012806	0.000378538	None	None	3.89258
NADK	0.00948914	0.968006	1	None	None	0.0141219
GNB1	-0.47176	0.00709537	0.0148427	None	None	2.14903
AL109917.1	-1.92722	0.661921	NA	None	None	0.179194
CALML6	NA	NA	NA	None	None	NA
CFAP74	7.6953	5.14646e-09	3.02122e-08	None	None	8.28849
PRKCZ	-0.143818	0.613154	0.699734	None	None	0.21243
AL590822.2	4.89243	1.09671e-07	5.2225e-07	None	None	6.95991
PRKCZ-AS1	7.79766	0.0004339	0.00116424	None	None	3.36261
FAAP20	2.28099	2.51119e-17	4.81747e-16	None	None	16.6001
AL590822.1	1.86767	0.356125	0.444334	None	None	0.448397
SKI	-0.423521	0.0320815	0.0570427	None	None	1.49374
AL590822.3	-0.00364205	0.999341	NA	None	None	0.000286434
MORN1	-0.141853	0.489334	0.581411	None	None	0.310395
RER1	1.6919	1.0303e-17	2.07337e-16	None	None	16.987
PEX10	1.44661	1.01876e-13	1.21454e-12	None	None	12.9919
PLCH2	-1.92722	0.661921	NA	None	None	0.179194
PANK4	0.431251	0.022215	0.0411501	None	None	1.65335
AL139246.5	2.31422	0.0897006	0.140183	None	None	1.0472
TNFRSF14-AS1	-1.92722	0.661921	NA	None	None	0.179194
TNFRSF14	-4.38603	0.00084398	0.002148	None	None	3.07367
PRXL2B	NA	NA	NA	None	None	NA
TTC34	2.59344	0.543283	NA	None	None	0.264974
PRDM16-DT	NA	NA	NA	None	None	NA
PRDM16	-0.396198	0.926294	NA	None	None	0.0332511
ARHGEF16	0.422975	0.414491	0.505958	None	None	0.382485
MEGF6	1.81718	0.232781	0.31257	None	None	0.633052
AL513320.1	0.841174	0.847455	NA	None	None	0.0718834
TPRG1L	0.314872	0.340218	0.427576	None	None	0.468242
WRAP73	0.439572	0.223467	0.30214	None	None	0.650787
TP73	0.499799	0.716851	0.792894	None	None	0.144571
CCDC27	NA	NA	NA	None	None	NA
LRRC47	0.147304	0.326869	0.413758	None	None	0.485626
CEP104	-1.04275	0.00179615	0.00429949	None	None	2.74566
DFFB	0.493533	0.402964	0.493744	None	None	0.394734
C1orf174	0.0788459	0.76841	0.838175	None	None	0.114407
LINC01134	-0.668553	0.649902	0.733395	None	None	0.187152
LINC02780	NA	NA	NA	None	None	NA
AJAP1	-1.92722	0.661921	0.743954	cell-substrate adhesion	None	0.179194
NPHP4	1.25339	0.274123	0.35597	None	None	0.562054
KCNAB2	-1.91558	0.352535	0.440455	None	None	0.452798
CHD5	-0.753337	0.844005	NA	None	None	0.0736548
RPL22	2.08624	4.64614e-08	2.34568e-07	None	cytoplasmic translation	7.33291
RNF207	0.52466	0.135836	0.198935	None	None	0.866984
ICMT	1.003	6.82331e-06	2.47098e-05	None	None	5.16601
LINC00337	6.41765	1.60325e-08	8.69661e-08	None	None	7.795
GPR153	4.58903	0.0167103	0.0319809	None	None	1.77701
ACOT7	0.361754	0.283557	0.366399	None	None	0.54736
AL031848.2	6.23228	0.00222291	0.00522043	None	None	2.65308
HES2	0.819614	0.00390982	0.00868734	None	None	2.40784
ESPN	3.8616	7.86857e-07	3.30509e-06	None	None	6.1041
TNFRSF25	0.923329	0.0345749	0.060975	None	None	1.46124
PLEKHG5	0.146453	0.678981	0.758722	None	None	0.168142
NOL9	-0.862206	2.08715e-06	8.21148e-06	None	None	5.68045
TAS1R1	3.18113	0.351001	NA	None	None	0.454692
ZBTB48	1.21079	1.47079e-06	5.91846e-06	None	None	5.83245
KLHL21	-0.879466	0.00156926	0.0038002	None	None	2.80431
PHF13	-0.489206	0.164032	0.233236	None	None	0.78507
THAP3	-0.0937054	0.727672	0.802085	None	None	0.138065
DNAJC11	-0.331364	0.0396613	0.0688115	None	None	1.40163
CAMTA1-DT	6.49748	5.78001e-09	3.36858e-08	None	None	8.23807
CAMTA1	-0.461839	0.119205	0.178276	None	None	0.923707
VAMP3	0.0424526	0.816286	0.878822	None	None	0.0881576
Z98884.2	NA	NA	NA	None	None	NA
PER3	-0.874587	0.242911	0.323539	None	None	0.614552
Z98884.1	-0.198328	0.961375	NA	None	None	0.017107
TNFRSF9	0.963719	0.82517	NA	None	None	0.0834568
PARK7	1.00466	2.70203e-07	1.21429e-06	None	intrinsic apoptotic signaling pathway in response to DNA damage	6.56831
AL034417.4	5.2514	1.49226e-10	1.13193e-09	None	None	9.82616
AL034417.3	1.79433	0.0331661	0.0587583	None	None	1.47931
ERRFI1	2.12915	1.97742e-05	6.66449e-05	None	None	4.7039
AL034417.2	2.15304	0.00342489	0.00770858	None	None	2.46535
LINC01714	1.27	0.354243	0.442293	None	None	0.450698
SLC45A1	7.49404	5.89389e-06	2.15574e-05	None	None	5.2296
RERE	0.340392	0.00681943	0.0143146	None	None	2.16625
RERE-AS1	8.9802	1.50438e-12	1.52208e-11	None	None	11.8226
ENO1	4.49429	1.3684e-47	2.39458e-45	None	intrinsic apoptotic signaling pathway in response to DNA damage	46.8638
CA6	NA	NA	NA	None	None	NA
SLC2A7	4.29003	0.313777	NA	None	None	0.503379
SLC2A5	-2.14331	0.0228269	0.0421788	None	None	1.64155
GPR157	-0.552656	0.0238937	0.0439039	None	None	1.62172
MIR34AHG	1.83581	7.1919e-12	6.62682e-11	None	None	11.1432
LNCTAM34A	1.95272	0.141164	0.205508	None	None	0.850276
H6PD	-1.51343	0.001535	0.00372622	None	None	2.81389
SPSB1	0.594683	0.201332	0.277222	None	None	0.696087
SLC25A33	4.1711	1.55201e-43	2.15398e-41	None	oxidative phosphorylation	42.8091
TMEM201	2.40919	0.0737249	0.118002	None	None	1.13239
PIK3CD	0.49805	0.539413	0.629758	None	None	0.268079
PIK3CD-AS2	6.24279	0.000463776	0.00123797	None	None	3.33369
CLSTN1	-0.645194	0.00365282	0.00816728	None	None	2.43737
CTNNBIP1	-0.259021	0.555767	0.645518	None	None	0.255107
LZIC	0.34202	0.0130711	0.0257129	None	None	1.88369
NMNAT1	-1.22752	4.9607e-09	2.92154e-08	None	None	8.30446
RBP7	0.16031	0.959349	NA	None	None	0.0180235
UBE4B	-0.403142	0.0420632	0.0724602	None	None	1.3761
KIF1B	0.00748741	0.975494	1	None	None	0.0107755
AL139424.3	7.69873	NA	NA	None	None	NA
AL139424.2	5.52816	0.140728	0.204951	None	None	0.851619
PGD	2.42874	1.35064e-22	4.33497e-21	None	None	21.8695
CENPS	4.89858	0.0116147	0.0231489	None	None	1.93499
DFFA	0.399941	0.0537322	0.0899514	None	None	1.26977
PEX14	-0.703559	0.000852204	0.00216619	None	None	3.06946
CASZ1	-2.09921	0.0106702	0.0214857	None	None	1.97183
AL139423.1	NA	NA	NA	None	None	NA
C1orf127	0	1	NA	None	None	0
TARDBP	-0.609649	NA	NA	None	None	NA
AL109811.2	-0.771977	NA	NA	None	None	NA
SRM	4.04062	3.74918e-13	4.11612e-12	None	None	12.4261
EXOSC10	-0.423466	0.0508977	0.0857413	None	None	1.2933
AL109811.1	8.59302	3.57564e-12	3.43467e-11	None	None	11.4466
EXOSC10-AS1	NA	NA	NA	None	None	NA
MTOR	-1.79637	2.45238e-31	1.50463e-29	mesenchyme development	None	30.6104
ANGPTL7	6.4516	0.0230904	0.0426143	None	None	1.63657
UBIAD1	0.283698	0.259739	0.341121	None	None	0.585463
AL031731.1	NA	NA	NA	None	None	NA
FBXO44	0.00516657	0.998151	1	None	None	0.000803576
FBXO6	1.15928	NA	NA	None	carbohydrate derivative catabolic process	NA
MAD2L2	-2.67249	0.178439	0.250325	mesenchyme development	None	0.74851
DRAXIN	2.43266	0.565106	NA	None	None	0.24787
AGTRAP	2.44885	0.000373702	0.0010149	None	None	3.42747
C1orf167	1.34046	0.757233	NA	None	None	0.120771
MTHFR	0.276333	0.100081	0.153813	None	None	0.99965
CLCN6	0.0457459	0.796645	0.861813	None	None	0.0987354
NPPA	8.70457	2.13193e-10	1.57195e-09	None	None	9.67123
AL021155.5	6.9604	1.13165e-07	5.37997e-07	None	None	6.94629
KIAA2013	0.779759	0.000304213	0.000841394	None	None	3.51682
PLOD1	1.90205	4.76596e-10	3.31296e-09	None	None	9.32185
AL096840.2	5.33125	0.209994	0.287173	None	None	0.677792
MFN2	-0.658724	0.0219292	0.0406768	None	None	1.65898
MIIP	1.57532	5.11873e-11	4.14858e-10	None	None	10.2908
TNFRSF8	6.72163	5.65768e-08	2.82169e-07	None	None	7.24736
TNFRSF1B	5.0852	6.03437e-35	4.70681e-33	None	intrinsic apoptotic signaling pathway in response to DNA damage	34.2194
VPS13D	-0.736217	1.36106e-07	6.39058e-07	None	None	6.86612
DHRS3	-3.50985	4.27481e-10	2.99287e-09	None	None	9.36908
AC254633.1	NA	NA	NA	None	None	NA
AADACL4	NA	NA	NA	None	None	NA
AADACL3	-0.00364205	0.999341	NA	None	None	0.000286434
C1orf158	0	1	NA	None	None	0
HNRNPCL3	NA	NA	NA	None	None	NA
LRRC38	-1.92722	0.661921	NA	None	None	0.179194
PDPN	-8.04647	0.000124818	0.000369823	cell-substrate adhesion	None	3.90372
PRDM2	-0.172305	0.217538	0.295413	None	None	0.662465
KAZN	-1.38656	2.23471e-07	1.0163e-06	None	None	6.65078
AL357873.1	11.4576	3.75849e-18	7.87874e-17	None	None	17.425
KAZN-AS1	9.50071	2.36038e-12	2.32389e-11	None	None	11.627
TMEM51-AS1	0.294114	0.826421	0.887338	None	None	0.0827987
TMEM51	-0.0371767	0.938619	0.981395	None	None	0.0275105
C1orf195	7.47061	5.09793e-07	2.19822e-06	None	None	6.29261
FHAD1	2.51025	0.0150745	0.0291973	None	None	1.82176
AL031283.2	-2.71748	0.534744	NA	None	None	0.271854
AL031283.1	-0.703336	0.854139	NA	None	None	0.0684715
EFHD2	0.449095	0.303518	0.388423	None	None	0.517815
CTRC	1.67169	0.491094	0.582917	None	None	0.308835
CELA2A	6.7467	NA	NA	None	None	NA
CELA2B	9.92468	2.48744e-11	2.11658e-10	None	None	10.6042
CASP9	0.727938	0.012498	0.0247355	None	None	1.90316
DNAJC16	-0.747932	3.99037e-06	1.49455e-05	None	None	5.39899
AGMAT	6.30565	1.0537e-12	1.09641e-11	None	None	11.9773
AL121992.1	5.90494	0.0179672	0.0341137	None	None	1.74552
DDI2	0.0859793	0.638572	0.723408	None	None	0.19479
PLEKHM2	-0.82237	0.00414323	0.00916044	None	None	2.38266
AL450998.3	8.5353	3.12224e-10	2.22729e-09	None	None	9.50553
SLC25A34	-2.60259	7.28268e-13	7.73386e-12	None	None	12.1377
SLC25A34-AS1	-0.0386909	0.991108	1	None	None	0.0038791
TMEM82	0	1	1	None	None	0
FBLIM1	-3.26797	7.98358e-20	1.98103e-18	None	None	19.0978
UQCRHL	-5.40353	0.163012	0.232014	None	None	0.787781
AL450998.2	-0.543416	0.0594619	0.0980749	None	None	1.22576
SPEN	-0.466184	0.0353471	0.0621137	None	None	1.45165
ZBTB17	0.500966	0.0120934	0.0240197	None	None	1.91745
HSPB7	3.82452	0.0317899	0.0565641	None	None	1.49771
CLCNKA	-3.00843	0.0925991	0.144053	None	None	1.03339
EPHA2	3.0506	2.33878e-05	7.81172e-05	None	intrinsic apoptotic signaling pathway in response to DNA damage	4.63101
AL451042.1	3.00562	0.482065	NA	None	None	0.316894
ARHGEF19	2.90083	0.497683	NA	None	None	0.303047
AL109627.1	-1.92722	0.661921	NA	None	None	0.179194
CPLANE2	4.18471	0.325904	NA	None	None	0.48691
FBXO42	-0.486379	0.0211261	0.0393394	None	None	1.67518
SZRD1	-0.481095	0.00415394	0.00918312	None	None	2.38154
SPATA21	8.55247	5.32386e-10	3.66032e-09	None	None	9.27377
NECAP2	1.00196	4.01333e-11	3.29785e-10	None	None	10.3965
LINC01772	-0.456568	0.63159	0.717088	None	None	0.199564
NBPF1	0.642541	0.013308	0.0261177	None	None	1.87589
CROCC	0.628872	0.167304	0.237134	None	None	0.776494
BX284668.5	-0.264005	0.905253	0.95467	None	None	0.0432303
BX284668.6	6.17586	0.0142612	0.0277958	None	None	1.84584
MFAP2	-2.96489	0.00348103	0.0078227	None	None	2.45829
AL049569.1	7.86214	1.78963e-18	3.86008e-17	None	None	17.7472
ATP13A2	0.104831	0.603396	0.691028	None	None	0.219397
SDHB	-0.326909	0.043601	0.0748339	None	None	1.3605
PADI2	4.73225	2.05333e-05	6.90181e-05	None	None	4.68754
PADI1	12.3585	2.51775e-21	7.08631e-20	None	None	20.599
PADI3	5.4184	0.127436	0.188415	None	None	0.894708
PADI4	-2.71748	0.534744	NA	None	None	0.271854
RCC2	-0.6462	0.0131119	0.025783	None	None	1.88233
ARHGEF10L	-1.63626	0.00030027	0.000830945	None	None	3.52249
LINC02810	NA	NA	NA	None	None	NA
IGSF21	-4.71039	0.271123	NA	None	None	0.566834
PAX7	NA	NA	NA	None	None	NA
ALDH4A1	-1.08371	0.482718	0.574874	None	None	0.316306
IFFO2	0.627878	0.0459168	0.0783807	None	None	1.33803
AL137127.1	0	1	NA	None	None	0
UBR4	-0.311946	0.0583038	0.0964335	None	None	1.2343
EMC1-AS1	0.33763	NA	NA	None	None	NA
EMC1	1.08647	1.86843e-09	1.18054e-08	None	None	8.72852
MRTO4	1.38216	3.98719e-17	7.49189e-16	None	ribosome biogenesis	16.3993
AKR7A3	5.33329	0.209819	0.287063	None	None	0.678155
AKR7A2	3.13361	1.01767e-05	3.57973e-05	None	None	4.99239
SLC66A1	0.381326	NA	NA	None	None	NA
CAPZB	-0.82974	2.8455e-17	5.4329e-16	None	None	16.5458
MICOS10	1.33984	NA	NA	None	None	NA
NBL1	0.828598	0.623362	0.709292	None	None	0.20526
TMCO4	-2.28171	1.3136e-08	7.24039e-08	None	None	7.88154
OTUD3	0.316109	0.126226	0.18683	None	None	0.89885
PLA2G2A	-3.41322	0.0724987	0.11628	None	None	1.13967
PLA2G5	-9.57151	3.66163e-11	3.02988e-10	None	None	10.4363
PLA2G2F	0.0298841	0.975917	1	None	None	0.0105873
UBXN10	-0.00364205	0.999341	NA	None	None	0.000286434
VWA5B1	-3.30264	0.360893	0.449113	None	None	0.442622
LINC01141	0	1	NA	None	None	0
CAMK2N1	3.45788	0.00199414	0.00472397	None	None	2.70024
MUL1	0.560213	0.0236674	0.0435478	None	None	1.62585
CDA	-0.623458	0.380673	0.470124	None	None	0.419448
PINK1	-1.45132	6.80387e-08	3.33873e-07	None	None	7.16724
PINK1-AS	0.0923969	0.921961	0.96764	None	None	0.0352876
DDOST	1.69665	8.31609e-08	4.02484e-07	None	None	7.08008
KIF17	1.77258	8.57607e-05	0.000260939	None	None	4.06671
SH2D5	0.293467	0.49411	0.585944	None	None	0.306177
HP1BP3	-0.529987	0.00321961	0.00728895	None	None	2.4922
EIF4G3	0.940798	9.67099e-06	3.42037e-05	None	None	5.01453
ECE1	4.99472	1.37423e-25	5.57559e-24	None	None	24.8619
NBPF3	-1.51779	1.5907e-14	2.10323e-13	None	None	13.7984
ALPL	7.93202	3.87383e-07	1.69989e-06	None	None	6.41186
RAP1GAP	-1.11324	1.63318e-08	8.84449e-08	None	None	7.78697
USP48	0.171597	0.235306	0.315288	None	None	0.628366
LDLRAD2	0	1	NA	None	None	0
HSPG2	-3.05828	1.68531e-17	3.30557e-16	None	None	16.7733
CELA3A	NA	NA	NA	None	None	NA
LINC00339	-0.439005	0.757098	0.828666	None	None	0.120848
CDC42	-0.0190542	0.840953	0.900417	None	None	0.0752282
CDC42-AS1	1.44814	0.00216174	0.00508568	None	None	2.6652
CDC42-IT1	-0.132955	NA	NA	None	None	NA
WNT4	5.73002	6.02532e-09	3.50343e-08	None	None	8.22002
AL445253.1	0.241938	0.867279	0.922509	None	None	0.061841
ZBTB40	0.141139	0.55499	0.644865	None	None	0.255715
ZBTB40-IT1	NA	NA	NA	None	None	NA
C1QA	-8.97594	2.47451e-05	8.23229e-05	None	None	4.60651
C1QC	-6.99585	0.100063	0.153798	None	None	0.999725
C1QB	-7.70975	0.0498342	0.0841822	None	None	1.30247
EPHB2	-5.13587	2.18347e-15	3.29881e-14	None	None	14.6609
KDM1A	1.00904	6.80351e-07	2.883e-06	None	intrinsic apoptotic signaling pathway in response to DNA damage	6.16727
AL031428.1	2.43851	4.67963e-14	5.8024e-13	None	None	13.3298
LUZP1	-0.758036	0.00928176	0.0189208	None	None	2.03237
LINC01355	-1.95298	7.60432e-27	3.43115e-25	None	None	26.1189
AL109936.6	1.58429	0.0273732	0.049618	None	None	1.56267
HNRNPR	-0.947641	4.8994e-10	3.39399e-09	None	None	9.30986
ZNF436	1.88705	4.19703e-10	2.94473e-09	None	None	9.37706
ZNF436-AS1	0.222567	0.428879	0.520521	None	None	0.367666
TCEA3	0.256402	0.795108	0.86044	None	None	0.099574
ASAP3	-2.72455	1.0339e-10	8.00854e-10	None	None	9.98552
E2F2	5.23536	5.49699e-07	2.35917e-06	None	intrinsic apoptotic signaling pathway in response to DNA damage	6.25988
ID3	5.26436	1.50759e-22	4.81567e-21	None	None	21.8217
AL450043.1	9.7437	3.96435e-11	3.26026e-10	None	None	10.4018
MDS2	6.61292	3.9678e-09	2.37008e-08	None	None	8.40145
RPL11	3.09382	4.1402e-08	2.10451e-07	None	intrinsic apoptotic signaling pathway in response to DNA damage	7.38298
ELOA-AS1	1.46145	2.51642e-11	2.14034e-10	None	None	10.5992
ELOA	0.394881	0.0177569	0.0337527	None	None	1.75063
PITHD1	1.06071	2.34532e-05	7.83095e-05	None	None	4.6298
LYPLA2	0.492737	0.0459939	0.0784723	None	None	1.3373
GALE	0.908349	0.0193982	0.0365071	None	None	1.71224
HMGCL	0.879138	8.65383e-06	3.08448e-05	None	None	5.06279
FUCA1	1.14462	0.000144684	0.000423693	None	carbohydrate derivative catabolic process	3.83958
CNR2	1.0877	NA	NA	None	None	NA
PNRC2	-0.509174	0.00153303	0.00372236	None	None	2.81445
SRSF10	-0.150946	0.259121	0.34062	None	None	0.586497
AL591178.1	0	1	NA	None	None	0
MYOM3	-0.00364205	0.999341	NA	None	None	0.000286434
IFNLR1	1.54722	0.000486049	0.00129211	None	None	3.31332
AL138902.1	-0.405839	0.794894	0.860255	None	None	0.0996908
GRHL3	1.89986	0.0161885	0.0310856	None	None	1.79079
STPG1	1.25516	2.24773e-06	8.79684e-06	None	None	5.64826
NIPAL3	-1.44984	3.08475e-05	0.000100743	None	None	4.51078
RCAN3AS	-1.12005	0.000195705	0.000559904	None	None	3.7084
RCAN3	-0.902527	1.68422e-06	6.71684e-06	None	None	5.7736
NCMAP-DT	-4.61575	0.000811436	0.00207173	None	None	3.09075
NCMAP	-5.07854	8.9327e-33	6.15622e-31	None	None	32.049
SRRM1	-0.111668	0.682538	0.762062	None	None	0.165873
AL445648.1	6.24175	0.000277516	0.00077308	None	None	3.55671
CLIC4	-0.186537	0.221307	0.299626	None	None	0.655005
RUNX3	-3.8481	0.0227369	0.0420318	connective tissue development	None	1.64327
AL050344.1	-3.73013	0.387039	NA	None	None	0.412245
SYF2	0.901704	2.05105e-06	8.08051e-06	None	None	5.68802
AL031432.4	0.230871	0.886293	0.938922	None	None	0.0524227
AL031432.5	0.841174	0.847455	NA	None	None	0.0718834
RSRP1	0.279604	0.231931	0.311605	None	None	0.634642
AL031432.3	-0.00364205	0.999341	NA	None	None	0.000286434
RHD	4.89203	1.24997e-09	8.14321e-09	None	None	8.9031
TMEM50A	0.0232593	0.885301	0.938069	None	None	0.0529089
RHCE	3.16444	1.51343e-12	1.52984e-11	None	None	11.82
MACO1	-0.38662	0.0431108	0.0740873	None	None	1.36541
LDLRAP1	-0.864138	5.45688e-06	2.00428e-05	None	None	5.26306
AL606491.1	-3.60733	0.0200064	0.0375252	None	None	1.69883
MAN1C1	-1.86503	5.22867e-11	4.22917e-10	None	None	10.2816
AL031280.1	3.66245	7.35603e-10	4.93278e-09	None	None	9.13336
SELENON	0.261009	0.679548	0.759271	None	None	0.16778
AL020996.1	1.18038	0.497452	0.589386	None	None	0.303249
MTFR1L	-1.90455	1.923e-53	4.66246e-51	None	None	52.716
AUNIP	0.656886	0.0811167	0.128494	None	None	1.09089
AL033528.2	7.64702	1.25875e-06	5.12567e-06	None	None	5.90006
PAQR7	-3.47407	7.61941e-41	8.66288e-39	None	None	40.1181
STMN1	0.851215	0.0800879	0.127055	None	None	1.09643
PAFAH2	-1.78323	7.31726e-15	1.02117e-13	None	None	14.1357
EXTL1	2.40136	0.00527153	0.0113837	None	None	2.27806
SLC30A2	-0.520892	0.029531	0.0530988	None	None	1.52972
AL391650.2	-2.36823	0.154956	0.222357	None	None	0.809792
TRIM63	7.66049	4.03709e-05	0.000129449	None	None	4.39393
PDIK1L	-0.345135	0.249443	0.330617	None	None	0.603029
FAM110D	NA	NA	NA	None	None	NA
ZNF593	2.59988	0.00338662	0.00763013	None	ribosome biogenesis	2.47023
CNKSR1	0.209176	0.344865	0.432306	None	None	0.462351
CATSPER4	-4.86924	0.246193	0.327173	None	None	0.608725
CEP85	2.5353	2.24292e-22	7.04157e-21	None	None	21.6492
SH3BGRL3	3.12389	5.37191e-14	6.60784e-13	None	None	13.2699
UBXN11	0.300231	0.419851	0.511415	None	None	0.376905
CD52	7.866	3.62596e-13	3.98737e-12	None	None	12.4406
CRYBG2	-1.05427	0.000451709	0.00120864	None	None	3.34514
ZNF683	-1.92722	0.661921	NA	None	None	0.179194
LIN28A	NA	NA	NA	None	None	NA
DHDDS	0.0986965	0.52764	0.618886	None	None	0.277662
AL513365.2	-1.38302	4.41051e-15	6.34432e-14	None	None	14.3555
HMGN2	0.52563	0.00268726	0.00619597	None	None	2.57069
RPS6KA1	1.68194	0.00013182	0.000388795	None	None	3.88002
AL512408.1	-2.8717	0.510558	NA	None	None	0.291955
ARID1A	-1.32706	3.11908e-45	4.79148e-43	None	None	44.506
PIGV	0.507124	0.153396	0.220449	None	None	0.814186
ZDHHC18	0.229352	0.278203	0.360499	None	None	0.555639
SFN	10.2351	3.95377e-16	6.59201e-15	None	intrinsic apoptotic signaling pathway in response to DNA damage	15.403
GPN2	-0.178253	0.331143	0.418115	None	None	0.479985
GPATCH3	1.27328	2.7831e-05	9.16196e-05	None	None	4.55547
NUDC	0.118104	0.29369	0.377602	None	None	0.53211
KDF1	-0.430842	0.10611	0.161649	None	None	0.974245
TRNP1	6.01929	0.000347834	0.000951191	None	None	3.45863
TENT5B	9.89764	3.71255e-14	4.6679e-13	None	None	13.4303
SLC9A1	-0.710938	7.77345e-08	3.77675e-07	None	None	7.10939
WDTC1	-1.90444	9.44361e-13	9.88779e-12	None	None	12.0249
TMEM222	0.886886	1.59507e-07	7.40468e-07	None	None	6.79722
SYTL1	3.4685	1.57371e-06	6.30486e-06	None	None	5.80308
MAP3K6	1.9302	0.176044	0.247391	None	None	0.754378
FCN3	NA	NA	NA	None	None	NA
WASF2	-0.345438	0.00261802	0.00605785	None	None	2.58203
FO393419.2	8.78473	1.40035e-11	1.23437e-10	None	None	10.8538
AHDC1	0.418395	0.276532	0.358496	None	None	0.558255
FGR	-6.54043	0.124397	0.184737	immune response-regulating cell surface receptor signaling pathway	None	0.90519
IFI6	3.43118	6.17021e-10	4.19633e-09	None	intrinsic apoptotic signaling pathway in response to DNA damage	9.2097
AL445490.1	7.76659	2.06312e-09	1.2934e-08	None	None	8.68548
FAM76A	1.32605	1.16772e-08	6.49329e-08	None	None	7.93266
STX12	-0.255466	0.0409908	0.0708006	None	None	1.38731
AL020997.3	NA	NA	NA	None	None	NA
AL020997.4	7.05473	0.00129443	0.00318393	None	None	2.88792
PPP1R8	-0.416282	0.0250726	0.0458316	None	None	1.6008
THEMIS2	0.307495	0.860191	0.916627	None	None	0.0654049
RPA2	0.608985	0.000646725	0.00168192	None	None	3.18928
SMPDL3B	4.1563	0.00598906	0.0127687	None	None	2.22264
AL512288.1	4.46164	0.0333954	0.059102	None	None	1.47631
XKR8	1.54578	0.242902	0.323539	None	None	0.614569
EYA3	-0.443902	0.00104121	0.00260678	None	None	2.98246
PTAFR	-0.500602	0.298262	0.382819	None	None	0.525403
DNAJC8	0.479321	6.45104e-06	2.34588e-05	None	None	5.19037
ATP5IF1	2.41643	7.44835e-32	4.71354e-30	None	None	31.1279
AL353622.1	2.84219	0.00168905	0.00406245	None	None	2.77236
SESN2	1.41214	1.11673e-10	8.60381e-10	None	None	9.95205
MED18	0.0977716	0.70164	0.77954	None	None	0.153886
PHACTR4	-0.351096	0.157471	0.225255	None	None	0.802801
RCC1	0.384437	0.226368	0.305528	None	None	0.645186
SNHG3	2.48155	0.21051	0.287715	None	None	0.676727
TRNAU1AP	0.00889434	0.958882	0.99847	None	None	0.0182349
SNHG12	1.58267	2.97915e-09	1.82226e-08	None	None	8.52591
TAF12	-0.367722	0.00694545	0.0145564	None	None	2.1583
RAB42	0.963719	0.82517	NA	None	None	0.0834568
LINC01715	4.32926	0.00185012	0.00441351	None	None	2.7328
AL360012.1	7.68236	0.000672329	0.0017431	None	None	3.17242
GMEB1	-1.48322	5.87913e-15	8.31424e-14	None	None	14.2307
YTHDF2	-0.285127	0.0444564	0.0761396	None	None	1.35207
OPRD1	-1.83566	0.281594	0.364307	None	None	0.550376
EPB41	-1.0174	8.96197e-07	3.73011e-06	None	None	6.0476
TMEM200B	0.760902	0.862079	NA	None	None	0.0644531
AL357500.1	-2.11729	0.26702	0.348697	None	None	0.573455
SRSF4	-0.621929	1.51439e-12	1.5299e-11	None	None	11.8198
MECR	-1.22747	1.9892e-09	1.25174e-08	None	None	8.70132
PTPRU	-0.418527	0.31233	0.397931	None	None	0.505387
LINC01756	5.97475	0.116124	0.174419	None	None	0.93508
MATN1-AS1	1.60012	0.195958	0.271206	None	None	0.707837
LAPTM5	-8.3411	0.000526808	0.00139109	immune response-regulating cell surface receptor signaling pathway	None	3.27835
SDC3	-1.22315	0.035983	0.0630877	None	None	1.4439
PUM1	-0.83104	3.52463e-09	2.12173e-08	None	None	8.45289
NKAIN1	2.27382	NA	NA	None	None	NA
SNRNP40	0.372455	0.0173561	0.033072	None	None	1.76055
ZCCHC17	-0.166217	0.413375	0.504717	None	None	0.383656
AL451070.1	9.86994	1.94407e-15	2.95264e-14	None	None	14.7113
FABP3	7.64195	0.000144451	0.000423134	None	None	3.84028
SERINC2	-0.587547	0.169479	0.239626	None	None	0.770885
LINC01226	-1.07107	0.502293	0.593967	None	None	0.299043
AC114488.1	5.17584	0.110968	0.167816	None	None	0.9548
TINAGL1	0.466452	0.197155	0.272553	None	None	0.705192
HCRTR1	6.91965	0.00591269	0.0126206	None	None	2.22821
PEF1	-1.1955	1.70471e-12	1.70166e-11	mesenchyme development	None	11.7684
AC114488.2	-4.31302	0.227253	NA	None	None	0.64349
AC114488.3	NA	NA	NA	None	None	NA
COL16A1	0.465078	0.784235	0.85156	None	None	0.105554
ADGRB2	4.72899	0.031353	0.0558856	None	None	1.50372
SPOCD1	5.92673	9.5799e-05	0.000288948	None	None	4.01864
AL354919.1	0	1	NA	None	None	0
AL136115.2	-0.498882	0.173266	0.244106	None	None	0.761286
PTP4A2	0.0502043	0.801261	0.865935	None	None	0.0962259
KHDRBS1	-0.17674	0.0483498	0.0819707	None	None	1.3156
AL445248.1	3.65175	0.000382114	0.00103564	None	None	3.41781
TMEM39B	-0.851441	1.72819e-07	7.99129e-07	None	None	6.76241
KPNA6	-0.302992	0.0304042	0.0543982	None	None	1.51707
TXLNA	0.541839	0.00060268	0.00157593	None	None	3.21991
CCDC28B	1.73734	0.205687	0.282176	None	None	0.686794
AL049795.1	0	1	NA	None	None	0
IQCC	7.25117	0.00106721	0.00266459	None	None	2.97175
DCDC2B	7.95668	1.18477e-08	6.58082e-08	None	None	7.92637
TMEM234	-0.223084	0.324148	0.410803	None	None	0.489257
EIF3I	1.13024	3.78722e-07	1.66479e-06	None	cytoplasmic translation	6.42168
FAM167B	0	1	NA	None	None	0
LCK	-5.55445	0.114864	0.172862	immune response-regulating cell surface receptor signaling pathway	None	0.939818
HDAC1	0.463414	0.000112478	0.000335584	None	None	3.94893
MARCKSL1	1.69708	0.178941	0.250854	None	None	0.74729
TSSK3	-2.13595	0.0956076	0.148092	None	None	1.01951
FAM229A	0.711618	0.394642	0.485172	None	None	0.403797
BSDC1	-0.615957	1.55049e-07	7.211e-07	None	None	6.80953
ZBTB8B	1.32892	0.5001	0.591931	None	None	0.300943
ZBTB8A	1.88315	NA	NA	None	None	NA
ZBTB8OS	-1.13983	1.3753e-34	1.05635e-32	None	None	33.8616
RBBP4	-0.85903	3.61663e-15	5.274e-14	None	None	14.4417
SYNC	1.15409	0.000510728	0.00135129	None	None	3.29181
KIAA1522	-0.814549	0.0610406	0.10026	None	None	1.21438
YARS	0.235889	0.285118	0.368062	None	None	0.544976
S100PBP	-1.41345	2.37164e-08	1.24874e-07	None	None	7.62495
FNDC5	5.79922	0.0161189	0.0309786	None	None	1.79266
HPCA	0	1	NA	None	None	0
TMEM54	-1.60184	3.92114e-05	0.000125992	None	None	4.40659
AL031602.2	2.47399	0.111115	0.167961	None	None	0.954229
RNF19B	-0.324311	0.150358	0.216857	None	None	0.822873
AL020995.1	10.2158	7.69305e-17	1.40231e-15	None	None	16.1139
AK2	-0.156431	0.432598	0.52415	None	None	0.363915
AZIN2	1.42923	0.0327137	0.0580487	None	None	1.48527
TRIM62	-3.35774	9.9305e-20	2.44305e-18	mesenchyme development	None	19.003
AL662907.3	-1.75569	0.688369	NA	None	None	0.162179
ZNF362	-4.38326	2.49548e-51	5.17722e-49	None	None	50.6028
AL513327.3	-8.29789	0.0508807	0.0857269	None	None	1.29345
A3GALT2	3.32745	0.360792	NA	None	None	0.442743
AL513327.1	7.49603	1.28875e-20	3.426e-19	None	None	19.8898
PHC2	-0.327906	0.0564704	0.093864	None	None	1.24818
AL513327.2	2.35552	3.25596e-11	2.71204e-10	None	None	10.4873
ZSCAN20	-0.695964	0.0835825	0.131923	None	None	1.07788
CSMD2	-5.94737	0.0224407	0.0415326	None	None	1.64896
SMIM12	0.0592967	0.72741	0.801841	None	None	0.138221
GJB5	-0.00364205	0.999341	NA	None	None	0.000286434
GJB4	4.33908	0.308231	NA	None	None	0.511123
GJB3	4.91666	0.247852	0.328988	None	None	0.605807
GJA4	NA	NA	NA	None	None	NA
DLGAP3	-0.00364205	0.999341	NA	None	None	0.000286434
TMEM35B	7.7076	2.55033e-05	8.45934e-05	None	None	4.5934
ZMYM6	0.279261	0.864232	0.920056	None	None	0.0633695
ZMYM1	0.371675	0.0182797	0.0346352	None	None	1.73803
AL590434.1	-1.75769	0.668204	NA	None	None	0.175091
SFPQ	-0.396535	0.00307503	0.00698837	None	None	2.51215
ZMYM4	-1.40193	4.31868e-16	7.1354e-15	None	None	15.3646
ZMYM4-AS1	10.2338	1.39618e-16	2.47549e-15	None	None	15.8551
KIAA0319L	-1.02178	4.72388e-06	1.75071e-05	None	None	5.3257
NCDN	1.51719	0.0501172	0.0845894	None	None	1.30001
AC004865.2	0.43507	0.778019	0.846042	None	None	0.10901
TFAP2E	4.15907	2.4598e-05	8.18742e-05	None	None	4.6091
PSMB2	-0.0996705	0.532444	0.623387	None	None	0.273726
C1orf216	5.22388	0.0363962	0.0636902	None	None	1.43894
CLSPN	3.36397	3.67993e-12	3.52173e-11	None	None	11.4342
AGO4	-1.44947	7.00095e-08	3.42291e-07	None	None	7.15484
AGO1	1.32688	0.144744	0.209979	None	None	0.8394
AGO3	-0.946977	3.66088e-05	0.000118253	None	None	4.43641
AL138787.2	9.74448	2.06448e-14	2.68904e-13	None	None	13.6852
ADPRHL2	0.609167	0.0262223	0.0477339	None	None	1.58133
COL8A2	5.59696	0.0621771	0.101902	None	None	1.20637
TRAPPC3	-0.517914	0.00612962	0.0130325	None	None	2.21257
MAP7D1	-0.516373	0.0284303	0.051326	None	None	1.54622
THRAP3	-0.389631	0.0148272	0.0287654	None	None	1.82894
SH3D21	0.730543	0.0026994	0.0062204	None	None	2.56873
EVA1B	-0.223766	0.563445	0.652967	None	None	0.249148
AL591845.1	1.4752	0.231929	0.311605	None	None	0.634645
STK40	0.307918	0.20874	0.2858	None	None	0.680394
LSM10	0.420902	0.225568	0.304613	None	None	0.646722
OSCP1	0.0413433	0.864457	0.920197	None	None	0.0632567
MRPS15	1.40355	8.9468e-07	3.72611e-06	None	None	6.04833
CSF3R	-1.91556	1.12376e-08	6.27658e-08	None	None	7.94933
GRIK3	0	1	NA	None	None	0
AL353604.1	-1.92722	0.661921	NA	None	None	0.179194
LINC01137	-2.06293	1.71099e-05	5.82114e-05	None	None	4.76675
ZC3H12A	0.666345	0.463953	0.556547	None	None	0.333526
MEAF6	-0.918618	0.000370223	0.00100681	None	None	3.43154
SNIP1	0.437416	0.0296623	0.0532873	None	None	1.52779
DNALI1	3.87285	0.0933062	0.144996	None	None	1.03009
GNL2	0.330108	0.178851	0.250763	None	None	0.747508
RSPO1	0	1	NA	None	None	0
C1orf109	-0.00465122	0.981516	1	None	None	0.00810242
CDCA8	1.28017	0.0373154	0.0651288	None	None	1.42811
EPHA10	3.77831	0.37554	NA	None	None	0.425344
MANEAL	6.35625	0.000740081	0.00190306	None	None	3.13072
YRDC	0.941077	0.000764579	0.0019613	None	None	3.11658
C1orf122	3.35884	4.73662e-06	1.7551e-05	None	None	5.32453
MTF1	-1.02882	3.09362e-09	1.88426e-08	None	None	8.50953
INPP5B	-1.06415	5.49504e-05	0.00017265	None	None	4.26003
SF3A3	-0.340899	0.033109	0.0586674	None	None	1.48005
FHL3	1.23264	0.173	0.243782	None	None	0.761955
UTP11	-0.334346	0.16965	0.239817	None	None	0.770446
MIR3659HG	1.24413	0.545636	0.635954	None	None	0.263097
AL354702.2	-4.72039	0.270081	NA	None	None	0.568506
RRAGC	0.519908	0.000937886	0.00236606	None	None	3.02785
AL139260.1	1.57065	3.14813e-29	1.67158e-27	None	None	28.5019
MYCBP	2.26745	0.000102806	0.000308189	None	None	3.98798
GJA9	10.8605	1.27605e-18	2.79427e-17	None	None	17.8941
RHBDL2	6.44283	4.05303e-16	6.72963e-15	None	None	15.3922
AKIRIN1	0.0421762	0.849957	0.907884	None	None	0.070603
NDUFS5	2.35613	2.43424e-07	1.10008e-06	None	oxidative phosphorylation	6.61364
MACF1	-0.578713	0.000208271	0.000592904	None	None	3.68137
AL442071.2	9.5657	2.63828e-06	1.0216e-05	None	None	5.57868
BMP8A	8.1921	4.91714e-11	3.99163e-10	None	None	10.3083
PABPC4	0.651502	0.000492186	0.00130669	None	None	3.30787
HEYL	-1.41856	0.605611	0.693091	mesenchyme development	None	0.217806
PPIE	1.41322	0.00278601	0.00640093	None	None	2.55502
BMP8B	5.23636	0.0684069	0.110554	None	None	1.1649
OXCT2	NA	NA	NA	None	None	NA
AL033527.4	-4.76884	0.149247	NA	None	None	0.826095
LINC02811	-2.8717	0.510558	NA	None	None	0.291955
TRIT1	-0.501324	0.0192686	0.0362767	None	None	1.71515
MYCL	0.466477	0.747936	0.820199	None	None	0.126135
MFSD2A	-2.93817	2.06944e-09	1.29696e-08	None	None	8.68415
CAP1	0.0539842	0.696004	0.774604	None	None	0.157388
PPT1	1.93631	6.16024e-26	2.57196e-24	None	None	25.2104
RLF	0.64899	4.50929e-09	2.6729e-08	None	None	8.34589
TMCO2	4.53521	0.286715	NA	None	None	0.542549
AL050341.2	-0.144945	0.908359	0.957058	None	None	0.0417426
ZMPSTE24	-0.35842	0.0673269	0.108966	None	None	1.17181
COL9A2	21.1881	NA	NA	None	None	NA
SMAP2	-0.511977	0.0821175	0.129866	None	None	1.08556
ZFP69B	-0.00364205	0.999341	NA	None	None	0.000286434
ZFP69	3.42248	0.0274246	0.0497037	None	None	1.56186
AL603839.3	-0.0583034	0.884054	0.936895	None	None	0.0535214
EXO5	0.391937	0.777117	0.84529	None	None	0.109514
ZNF684	-0.328327	0.339298	0.426618	None	None	0.469419
RIMS3	2.32554	0.549269	NA	None	None	0.260215
AL031289.2	NA	NA	NA	None	None	NA
AL031289.1	4.1234	0.183965	0.256984	None	None	0.735265
NFYC-AS1	7.72397	2.19145e-10	1.6107e-09	None	None	9.65927
NFYC	-1.43314	1.1746e-12	1.20909e-11	None	None	11.9301
KCNQ4	-4.69725	0.00132624	0.00325797	None	None	2.87738
CITED4	-2.5041	4.658e-07	2.01977e-06	None	None	6.3318
AC119677.1	1.2973	0.720916	NA	None	None	0.142115
CTPS1	-0.737378	0.0994847	0.153142	None	None	1.00224
SLFNL1-AS1	-1.23691	0.000708918	0.00182831	None	None	3.1494
SLFNL1	7.40433	0.000197898	0.000565454	None	None	3.70356
SCMH1	-4.2845	2.30896e-41	2.71728e-39	None	None	40.6366
AC093151.8	1.02217	NA	NA	None	None	NA
FOXO6	-0.367648	0.328237	0.415176	None	None	0.483812
AC093151.2	5.64226	0.18449	0.257554	None	None	0.734026
HIVEP3	-3.29503	2.9907e-10	2.14562e-09	None	None	9.52423
GUCA2B	NA	NA	NA	None	None	NA
GUCA2A	-3.30653	0.445537	NA	None	None	0.351116
FOXJ3	-0.996624	4.33359e-07	1.88969e-06	None	None	6.36315
RIMKLA	2.68033	0.0116428	0.0232002	None	None	1.93394
ZMYND12	4.93874	0.245722	0.326655	None	None	0.609557
PPCS	0.143883	0.292215	0.37585	None	None	0.534297
CCDC30	-0.520115	0.0403289	0.0698133	None	None	1.39438
PPIH	-0.703808	1.39231e-07	6.53119e-07	None	None	6.85627
AC098484.4	4.81523	NA	NA	None	None	NA
YBX1	1.06326	4.62505e-05	0.000147084	None	cytoplasmic translation	4.33488
CLDN19	3.39315	0.0636475	0.103897	None	None	1.19622
P3H1	1.33411	1.61933e-05	5.53547e-05	None	None	4.79067
C1orf50	0.74763	NA	NA	None	None	NA
TMEM269	6.56279	4.66892e-10	3.24887e-09	None	None	9.33078
SVBP	0.216013	0.424191	0.51565	None	None	0.372438
ERMAP	-1.98408	6.00879e-25	2.31206e-23	immune response-regulating cell surface receptor signaling pathway	None	24.2212
AL512353.1	1.86527	0.123516	0.183682	None	None	0.908276
ZNF691	-1.2886	1.01881e-06	4.2091e-06	None	None	5.99191
SLC2A1	0.208622	0.605841	0.693315	None	None	0.217641
SLC2A1-AS1	-1.01044	0.00713995	0.0149282	None	None	2.1463
AC099795.1	7.33142	2.1853e-06	8.57416e-06	None	None	5.66049
FAM183A	-0.71733	0.124303	0.184652	None	None	0.905518
EBNA1BP2	1.08525	7.02679e-11	5.56283e-10	None	ribosome biogenesis	10.1532
CFAP57	2.65944	0.0360523	0.0631983	None	None	1.44307
TMEM125	7.57418	1.95435e-06	7.72679e-06	None	None	5.709
C1orf210	5.40662	0.00480349	0.0104673	None	None	2.31844
TIE1	-2.65327	0.0188722	0.0356104	extracellular matrix organization	None	1.72418
AL139289.2	0.896275	0.352137	0.44004	None	None	0.453288
CDC20	8.52728	1.54665e-09	9.92816e-09	None	None	8.81061
ELOVL1	1.0083	1.8538e-06	7.35382e-06	None	None	5.73194
MED8	1.32518	5.48741e-10	3.76633e-09	None	None	9.26063
SZT2	-0.846823	4.39695e-06	1.63527e-05	None	None	5.35685
HYI	0.515633	0.664979	0.746432	None	None	0.177192
HYI-AS1	NA	NA	NA	None	None	NA
PTPRF	-1.20408	4.11399e-11	3.37367e-10	None	None	10.3857
KDM4A	-1.23973	0.425034	0.516602	None	None	0.371576
KDM4A-AS1	4.60608	4.90654e-06	1.81439e-05	None	None	5.30922
ST3GAL3	-2.7473	0.054741	0.0914197	None	None	1.26169
AL451062.1	7.53823	1.07143e-08	6.00597e-08	None	None	7.97004
ARTN	-7.86229	0.00183109	0.00437479	None	None	2.73729
AL357079.1	-0.578382	0.695669	0.774317	None	None	0.157597
IPO13	-2.96175	7.30637e-06	2.63359e-05	None	None	5.1363
DPH2	6.88447	9.97709e-06	3.51812e-05	None	None	5.001
ATP6V0B	1.28798	0.000434847	0.00116663	None	None	3.36166
B4GALT2	-1.36356	0.00244973	0.00570452	None	None	2.61088
CCDC24	-0.620361	0.103526	0.158285	None	None	0.984952
SLC6A9	-1.0005	0.231665	0.311321	None	None	0.635139
AL139220.2	-0.729009	0.570282	0.659485	None	None	0.24391
DMAP1	-1.3635	8.5288e-05	0.000259618	None	None	4.06911
ERI3	-1.59808	5.7797e-12	5.38074e-11	None	None	11.2381
ERI3-IT1	NA	NA	NA	None	None	NA
RNF220	-0.33692	0.23296	0.312743	None	None	0.632719
TMEM53	1.75943	3.59029e-08	1.84126e-07	None	None	7.44487
ARMH1	2.04479	2.87238e-06	1.10671e-05	None	None	5.54176
KIF2C	3.1133	5.06605e-05	0.000160171	None	None	4.29533
AL592166.1	1.79504	0.114824	0.172829	None	None	0.939966
RPS8	3.17809	6.25236e-15	8.79878e-14	None	ribosome biogenesis	14.204
BEST4	-7.819	0.000234871	0.000662816	None	None	3.62917
PLK3	0.852704	0.00537404	0.0115851	None	None	2.2697
TCTEX1D4	1.04276	0.643846	0.727908	None	None	0.191218
BTBD19	-0.497566	0.14028	0.204357	None	None	0.853005
PTCH2	8.30643	6.92458e-08	3.3883e-07	None	None	7.15961
EIF2B3	0.779762	0.00711793	0.0148869	None	None	2.14765
HECTD3	0.93159	3.84056e-05	0.000123521	None	None	4.41561
UROD	0.856621	0.262924	0.344471	None	None	0.58017
ZSWIM5	-1.90933	6.47735e-10	4.38152e-09	None	None	9.1886
LINC01144	NA	NA	NA	None	None	NA
HPDL	5.95551	0.00073305	0.00188716	None	None	3.13487
MUTYH	1.38023	1.43083e-07	6.6994e-07	None	None	6.84441
TOE1	0.862573	0.00379423	0.00845946	None	None	2.42088
TESK2	-0.875952	0.0247472	0.0453069	None	None	1.60647
CCDC163	5.92766	0.01275	0.0251772	None	None	1.89449
MMACHC	4.18129	0.00767606	0.0159514	None	None	2.11486
PRDX1	1.8073	1.5039e-06	6.04082e-06	None	None	5.82278
AKR1A1	2.04388	2.98428e-12	2.8919e-11	None	None	11.5252
NASP	-0.0686735	0.575338	0.664301	None	None	0.240077
CCDC17	6.49969	0.00248635	0.00578375	None	None	2.60444
GPBP1L1	0.00537643	0.973607	1	None	None	0.0116165
TMEM69	0.185376	0.318203	0.404288	None	None	0.497296
IPP	-1.47756	4.51371e-13	4.90199e-12	None	None	12.3455
AL604028.1	NA	NA	NA	None	None	NA
MAST2	-0.71048	0.000150473	0.000439177	None	None	3.82254
PIK3R3	-0.541823	0.719957	0.79514	None	None	0.142693
AL358075.2	NA	NA	NA	None	None	NA
TSPAN1	6.10333	0.0732932	0.117423	None	None	1.13494
POMGNT1	0.0589458	0.806915	0.870809	None	None	0.0931721
LURAP1	-0.876378	0.0337654	0.0596938	None	None	1.47153
RAD54L	1.6515	0.00668434	0.0140618	None	None	2.17494
LRRC41	-1.4771	1.46766e-17	2.89277e-16	None	None	16.8334
UQCRH	1.45873	2.02968e-11	1.74702e-10	None	oxidative phosphorylation	10.6926
NSUN4	0.0328684	0.841636	0.901052	None	None	0.0748759
FAAH	0.0615496	0.811697	0.874771	None	None	0.0906059
MKNK1-AS1	8.96053	1.70467e-11	1.48307e-10	None	None	10.7684
MKNK1	-0.225616	0.37758	0.466762	None	None	0.422991
MOB3C	-8.80693	4.18447e-07	1.82744e-06	None	None	6.37836
ATPAF1	-1.27841	9.80586e-08	4.69841e-07	None	None	7.00851
TEX38	5.94333	0.0471453	0.0801989	None	None	1.32656
EFCAB14-AS1	9.30083	3.48256e-07	1.54028e-06	None	None	6.4581
EFCAB14	-0.788624	3.58386e-07	1.58231e-06	None	None	6.44565
CYP4B1	-6.31074	2.96312e-15	4.38777e-14	None	None	14.5283
CYP4X1	0	1	NA	None	None	0
CYP4Z1	0	1	1	None	None	0
CYP4A22-AS1	-3.42277	0.428993	NA	None	None	0.36755
PDZK1IP1	NA	NA	NA	None	None	NA
TAL1	-5.83702	0.0121293	0.0240863	None	None	1.91616
STIL	0.604461	0.0685319	0.110721	None	None	1.16411
CMPK1	-0.262567	0.142559	0.207272	None	None	0.846005
LINC01389	8.7214	5.19166e-11	4.206e-10	None	None	10.2847
TRABD2B	-5.07293	0.0272187	0.0493645	None	None	1.56513
LINC02794	NA	NA	NA	None	None	NA
AL109659.1	NA	NA	NA	None	None	NA
SLC5A9	NA	NA	NA	None	None	NA
AL109659.2	NA	NA	NA	None	None	NA
SPATA6	-1.18766	0.334104	0.421112	None	None	0.476118
AGBL4	-3.17678	1.07549e-09	7.07978e-09	None	None	8.9684
BEND5	NA	NA	NA	None	None	NA
AC099788.1	1.72683	0.388253	0.47834	None	None	0.410885
ELAVL4	-1.92722	0.661921	NA	None	None	0.179194
FAF1	-1.0021	2.84233e-05	9.34308e-05	None	None	4.54633
CDKN2C	3.5785	0.108325	0.164536	None	None	0.96527
LINC01562	0.566694	0.663845	0.745492	None	None	0.177933
RNF11	-1.05014	2.81344e-10	2.0262e-09	None	None	9.55076
AL162430.2	8.9459	1.44251e-12	1.46316e-11	None	None	11.8409
TTC39A	6.29515	7.51234e-26	3.11066e-24	None	None	25.1242
TTC39A-AS1	8.08174	6.47781e-09	3.74812e-08	None	None	8.18857
EPS15	-1.04168	1.90591e-09	1.20158e-08	None	None	8.7199
AC104170.1	-1.91393	6.47379e-12	5.99258e-11	None	None	11.1888
OSBPL9	0.663977	0.000347941	0.000951353	None	None	3.45849
NRDC	-0.139141	0.368909	0.457786	None	None	0.433081
RAB3B	-5.29034	7.10702e-78	4.46943e-75	None	None	77.1483
TXNDC12	-0.108177	0.521519	0.612421	None	None	0.28273
KTI12	7.83956	3.88512e-10	2.73084e-09	None	None	9.4106
AL445685.1	7.91964	1.76808e-10	1.32467e-09	None	None	9.7525
BTF3L4	0.252057	0.127546	0.188536	None	None	0.894335
ZFYVE9	-2.10454	7.04948e-22	2.10168e-20	None	None	21.1518
CC2D1B	0.180589	0.352403	0.440346	None	None	0.45296
AL513218.1	NA	NA	NA	None	None	NA
AL513218.2	2.20055	0.050629	0.0853744	None	None	1.2956
ORC1	2.82501	0.000150652	0.000439571	None	None	3.82202
PRPF38A	0.903763	6.01438e-11	4.80864e-10	None	None	10.2208
TUT4	-0.221482	0.306172	0.39125	None	None	0.514035
GPX7	5.40378	0.0720839	0.115716	None	None	1.14216
SHISAL2A	-0.587396	0.774019	NA	None	None	0.111248
COA7	2.11871	4.39546e-11	3.58405e-10	None	None	10.357
ZYG11B	-0.210534	0.243267	0.323927	None	None	0.613917
ZYG11A	5.7748	1.14439e-17	2.2847e-16	None	None	16.9414
ECHDC2	0.147065	0.702438	0.780297	None	None	0.153392
SCP2	-0.606963	0.044014	0.0754654	None	None	1.35641
PODN	0	1	1	None	None	0
SLC1A7	NA	NA	NA	None	None	NA
CPT2	-1.31887	1.67793e-08	9.07217e-08	None	None	7.77523
AL606760.2	1.31599	0.488634	0.58082	None	None	0.311016
CZIB	0.0938795	NA	NA	None	None	NA
AL606760.3	6.57927	0.0110368	0.0221485	None	None	1.95716
MAGOH	0.282991	0.0614043	0.100816	None	None	1.2118
AL606760.1	7.55437	3.68067e-09	2.20972e-08	None	None	8.43407
LRP8	-1.53332	6.25698e-05	0.000194674	None	None	4.20364
LINC01771	-6.45096	1.07467e-09	7.07679e-09	None	None	8.96872
AC119428.2	-4.96121	0.105669	0.161111	None	None	0.976054
LINC02812	0	1	NA	None	None	0
GLIS1	-0.703482	0.80744	NA	None	None	0.0928898
NDC1	1.63624	4.37947e-09	2.60285e-08	None	None	8.35858
YIPF1	-0.844498	5.34735e-08	2.67288e-07	None	None	7.27186
DIO1	9.69539	8.54472e-15	1.18344e-13	None	None	14.0683
HSPB11	-0.930288	2.20263e-06	8.63042e-06	None	None	5.65706
LRRC42	-1.30746	2.48881e-17	4.77908e-16	None	None	16.604
LDLRAD1	-0.00364205	0.999341	NA	None	None	0.000286434
TMEM59	0.831565	1.18013e-06	4.82606e-06	None	None	5.92807
TCEANC2	-0.525903	0.0786165	0.12492	None	None	1.10449
CYB5RL	3.2447	0.0154691	0.0298551	None	None	1.81054
MRPL37	0.145083	0.509903	0.6012	None	None	0.292513
SSBP3	0.726421	0.0123889	0.0245437	None	None	1.90697
SSBP3-AS1	-1.92722	0.661921	NA	None	None	0.179194
AC099796.2	5.2301	0.00809024	0.0167188	None	None	2.09204
ACOT11	4.48664	7.92119e-25	3.03053e-23	None	None	24.1012
MROH7	0.424104	0.785932	0.853125	None	None	0.104615
TTC4	-0.238566	0.868048	0.923189	None	None	0.0614565
PARS2	4.76936	1.4131e-07	6.62411e-07	None	None	6.84983
TTC22	-0.00364205	0.999341	NA	None	None	0.000286434
LEXM	NA	NA	NA	None	None	NA
DHCR24	1.10115	0.0055528	0.0119258	None	None	2.25549
AC096536.3	8.46071	1.23762e-10	9.4843e-10	None	None	9.90741
DHCR24-DT	NA	NA	NA	None	None	NA
USP24	-1.51138	1.34371e-08	7.3882e-08	None	None	7.87169
MIR4422HG	0.869924	0.812975	0.875819	None	None	0.089923
AL603840.1	-1.6722	0.101989	0.156303	None	None	0.991449
LINC01753	-10.4632	2.36924e-09	1.46658e-08	None	None	8.62539
AC119674.1	-3.82865	6.35152e-08	3.13664e-07	None	None	7.19712
PLPP3	-4.28147	3.46154e-56	9.41352e-54	None	None	55.4607
PRKAA2	2.46675	3.18202e-05	0.000103684	None	None	4.4973
FYB2	0.119292	0.937046	0.980507	None	None	0.028239
DAB1	-0.239024	0.610164	0.696836	None	None	0.214553
OMA1	-0.442702	0.769207	0.838907	None	None	0.113957
AL035411.3	-0.00364205	0.999341	NA	None	None	0.000286434
TACSTD2	5.90946	1.87282e-09	1.18294e-08	None	None	8.7275
MYSM1	0.106287	0.504274	0.595926	None	None	0.297333
AL136985.3	-4.3939	0.152648	NA	None	None	0.816309
JUN	5.52204	2.2942e-23	7.78557e-22	None	None	22.6394
LINC01135	2.30314	1.4065e-05	4.84913e-05	None	None	4.85186
LINC01358	1.53346	0.470981	0.563531	None	None	0.326997
AC093425.1	3.31904	0.43579	NA	None	None	0.360723
FGGY	0.512131	0.309267	0.394804	None	None	0.509666
HOOK1	1.29164	0.00103097	0.00258274	None	None	2.98676
CYP2J2	4.75202	2.79714e-11	2.36312e-10	None	None	10.5533
C1orf87	4.84825	0.254534	0.335841	None	None	0.594254
LINC01748	-2.85121	2.75957e-11	2.33334e-10	None	None	10.5592
AC099792.1	-11.7291	2.66216e-12	2.59938e-11	None	None	11.5748
NFIA	-2.67412	3.86839e-08	1.97583e-07	connective tissue development	None	7.41247
NFIA-AS2	-7.01819	0.0105356	0.0212401	None	None	1.97734
TM2D1	-0.463407	0.0153217	0.0296105	None	None	1.81469
PATJ	1.65462	0.00053334	0.00140649	None	None	3.273
L1TD1	0.107288	0.852837	0.910526	None	None	0.0691338
KANK4	-0.731845	0.209012	0.286153	None	None	0.679829
USP1	-0.185129	0.34313	0.430576	None	None	0.464541
DOCK7	-0.853475	2.76385e-10	1.99783e-09	None	None	9.55849
AC103923.1	0.065796	0.934267	0.978108	None	None	0.0295288
ATG4C	-0.525348	0.0690823	0.111502	None	None	1.16063
LINC01739	NA	NA	NA	None	None	NA
LINC00466	5.01278	0.229765	0.309367	None	None	0.638716
ALG6	-0.745022	0.00460154	0.0100686	None	None	2.3371
ITGB3BP	0.236154	0.529935	0.621107	None	None	0.275777
BX004807.1	8.36152	2.05452e-10	1.51781e-09	None	None	9.68729
EFCAB7	3.29719	5.23539e-10	3.60688e-09	None	None	9.28105
DLEU2L	5.04139	0.235988	0.316019	None	None	0.627109
PGM1	-1.43354	1.92684e-10	1.43084e-09	None	None	9.71515
ROR1	-0.87824	0.122941	0.182993	None	None	0.910304
ROR1-AS1	0.290915	0.888226	0.940375	None	None	0.0514766
AL445205.1	NA	NA	NA	None	None	NA
UBE2U	-10.2475	3.4374e-09	2.07481e-08	None	None	8.46377
CACHD1	-7.70264	2.1544e-09	1.3456e-08	None	None	8.66667
RAVER2	-0.165892	0.788115	0.854948	None	None	0.10341
JAK1	-1.09309	4.98907e-05	0.000157961	None	None	4.30198
LINC01359	-2.8829	0.508824	NA	None	None	0.293432
AL357078.2	NA	NA	NA	None	None	NA
AK4	4.64347	5.86625e-113	9.8377e-110	None	oxidative phosphorylation	112.232
DNAJC6	-1.78547	0.000163818	0.000475024	None	None	3.78564
AL139294.1	11.3741	1.13378e-17	2.26801e-16	None	None	16.9455
LEPROT	0.232887	0.903592	0.953383	None	None	0.0440278
LEPR	-0.0995227	0.750517	0.82267	None	None	0.124639
AC119800.1	0	1	NA	None	None	0
PDE4B	2.28132	0.00874594	0.0179266	None	carbohydrate derivative catabolic process	2.05819
SGIP1	0.462866	0.724386	0.799164	None	None	0.14003
AL139147.1	0.462159	0.915028	NA	None	None	0.0385655
TCTEX1D1	-6.06716	0.115467	0.17355	None	None	0.937541
WDR78	-0.599621	0.0693928	0.11195	None	None	1.15869
MIER1	-0.203549	0.198629	0.274119	None	None	0.701958
SLC35D1	-0.438556	0.438293	0.529933	None	None	0.358236
C1orf141	-3.32331	0.443125	NA	None	None	0.353473
IL23R	-3.41488	0.430105	NA	None	None	0.366425
IL12RB2	3.33333	5.24526e-08	2.62641e-07	None	None	7.28023
SERBP1	1.16897	1.50818e-11	1.3242e-10	None	ribosome biogenesis	10.8215
GADD45A	6.50599	2.44247e-23	8.2748e-22	None	None	22.6122
GNG12	-2.33705	2.26743e-16	3.91e-15	None	None	15.6445
GNG12-AS1	-1.11019	0.000556798	0.00146413	None	None	3.2543
DIRAS3	0	1	NA	None	None	0
WLS	-1.02612	0.0598421	0.0985888	None	None	1.22299
DEPDC1	7.85406	3.37797e-09	2.04446e-08	None	None	8.47134
AL033530.1	-0.535527	0.480066	0.572246	None	None	0.318699
AL691520.1	-0.704695	0.847578	NA	None	None	0.0718204
LINC01707	-8.49686	1.83452e-06	7.28449e-06	None	None	5.73648
LINC02791	NA	NA	NA	None	None	NA
LRRC7	4.30457	1.98448e-05	6.6849e-05	None	None	4.70235
LRRC40	-0.105639	0.667281	0.748336	None	None	0.175691
SRSF11	-0.128456	0.447735	0.539566	None	None	0.348979
ANKRD13C	0.781868	2.80351e-12	2.72681e-11	None	None	11.5523
HHLA3	2.31928	1.55234e-14	2.05657e-13	None	None	13.809
CTH	9.11769	1.55448e-10	1.17603e-09	None	None	9.80841
PTGER3	0.906776	0.566896	0.656097	None	None	0.246496
ZRANB2-AS1	10.3891	1.12387e-09	7.36703e-09	None	None	8.94928
ZRANB2	-0.611483	6.77912e-06	2.4563e-05	None	None	5.16883
ZRANB2-AS2	-0.360365	0.827884	0.888646	None	None	0.0820305
NEGR1	-4.20229	8.13619e-05	0.000248758	None	None	4.08958
AL513166.1	-1.86944	0.340229	0.427576	None	None	0.468228
AL583808.1	-1.01703	0.710377	0.786945	None	None	0.148511
LRRIQ3	3.71248	0.0316864	0.0563999	None	None	1.49913
FPGT	0.950653	NA	NA	None	None	NA
TNNI3K	0.894793	0.285977	0.368935	None	None	0.543668
ERICH3	NA	NA	NA	None	None	NA
CRYZ	2.37381	3.39433e-08	1.74879e-07	None	None	7.46925
TYW3	-0.273045	0.301525	0.386194	None	None	0.520677
SLC44A5	-2.80368	2.75912e-18	5.85084e-17	None	None	17.5592
ACADM	0.563532	0.301598	0.386264	None	None	0.520571
RABGGTB	1.37239	1.55141e-12	1.56103e-11	None	None	11.8093
MSH4	-2.39373	5.71492e-16	9.29726e-15	None	None	15.243
AC092813.1	-6.54169	0.063732	0.103993	None	None	1.19564
ST6GALNAC3	-4.32676	0.0018131	0.00433593	None	None	2.74158
ST6GALNAC5	2.00936	0.437491	0.529186	None	None	0.359031
AL035409.1	NA	NA	NA	None	None	NA
PIGK	-0.289665	0.312559	0.398173	None	None	0.505068
AK5	1.64529	0.137701	0.201227	None	None	0.861063
AC118549.1	0.238673	0.121697	0.181396	None	None	0.91472
USP33	-2.00429	1.20349e-45	1.89211e-43	None	None	44.9196
MIGA1	-0.33035	0.141135	0.205484	None	None	0.850365
NEXN-AS1	8.94143	1.24738e-12	1.27812e-11	None	None	11.904
NEXN	0.128519	0.667346	0.748338	None	None	0.175649
FUBP1	-0.580219	0.000210328	0.000598506	None	None	3.6771
DNAJB4	1.63554	NA	NA	None	None	NA
GIPC2	0.850078	0.00328604	0.00742348	None	None	2.48333
AC103591.3	8.1259	2.99975e-05	9.81738e-05	None	None	4.52291
AC096531.2	-3.01408	0.488737	NA	None	None	0.310924
PTGFR	-4.3513	0.310402	0.395876	None	None	0.508075
IFI44L	-9.44679	2.45405e-05	8.16962e-05	None	None	4.61012
IFI44	-8.68921	0.00330377	0.00745934	None	None	2.48099
ADGRL4	-9.00353	1.08166e-10	8.36141e-10	None	None	9.96591
AC099671.1	-3.80115	0.377721	NA	None	None	0.422829
AL606519.1	NA	NA	NA	None	None	NA
AL136234.1	-3.4345	1.98923e-18	4.27685e-17	None	None	17.7013
LINC01781	7.56465	6.553e-08	3.22812e-07	None	None	7.18356
ADGRL2	-1.44523	0.000145717	0.000426471	None	None	3.83649
AL157944.1	-0.475869	0.250728	0.331951	None	None	0.600797
LINC01362	7.74512	3.7224e-06	1.4028e-05	None	None	5.42918
AC116099.1	-7.33737	0.0844528	0.133056	None	None	1.07339
LINC01725	-5.4379	1.50761e-27	7.18938e-26	None	None	26.8217
TTLL7	0.285204	0.700672	0.778723	None	None	0.154485
AC104454.2	NA	NA	NA	None	None	NA
AL359504.2	4.21282	0.318754	0.404937	None	None	0.496544
PRKACB	-1.87502	0.000234345	0.000661516	None	None	3.63015
SAMD13	2.89845	0.188179	0.261871	None	None	0.725428
RPF1	0.29464	0.0389967	0.0677811	None	None	1.40897
GNG5	1.45321	2.69388e-09	1.65582e-08	None	None	8.56962
SPATA1	3.8764	1.19105e-15	1.86237e-14	None	None	14.9241
CTBS	1.32046	4.22118e-06	1.57397e-05	None	carbohydrate derivative catabolic process	5.37457
AL359762.1	6.05197	0.0370045	0.064631	None	None	1.43175
SSX2IP	-0.381136	0.351577	0.439423	None	None	0.453979
LPAR3	6.04356	2.48913e-05	8.27134e-05	None	None	4.60395
MCOLN2	-0.765918	0.643358	0.72756	None	None	0.191548
WDR63	1.90437	0.0409455	0.0707407	None	None	1.38779
MCOLN3	-5.47505	0.00044927	0.00120244	None	None	3.34749
SYDE2	-0.365924	0.351069	0.438951	None	None	0.454607
C1orf52	0.353089	0.0647958	0.105463	None	None	1.18845
BCL10	1.37143	7.11911e-13	7.56415e-12	None	None	12.1476
AL078459.1	1.16933	0.038491	0.067018	None	None	1.41464
DDAH1	1.28974	0.074523	0.119071	None	None	1.12771
AC092807.3	NA	NA	NA	None	None	NA
CCN1	2.82185	0.0593127	0.097885	None	None	1.22685
ZNHIT6	-0.70018	0.0659111	0.106976	None	None	1.18104
COL24A1	-0.719394	0.759259	0.830579	None	None	0.11961
LINC02795	-0.00364205	0.999341	NA	None	None	0.000286434
ODF2L	1.9006	2.10218e-06	8.26738e-06	None	None	5.67733
CLCA4-AS1	-2.68668	0.0068826	0.0144419	None	None	2.16225
AL049597.2	NA	NA	NA	None	None	NA
SH3GLB1	-0.716548	0.00281714	0.00646286	None	None	2.55019
AL355981.1	-0.965429	0.826616	NA	None	None	0.0826964
SELENOF	0.218886	0.184046	0.25708	None	None	0.735072
HS2ST1	-0.11968	0.653668	0.737108	None	None	0.184642
LINC01140	-1.19253	0.383772	0.473486	None	None	0.415926
LINC02801	-2.27764	0.167689	0.237529	None	None	0.775496
LMO4	2.22204	7.11512e-22	2.11812e-20	None	None	21.1478
PKN2-AS1	-2.12085	2.23662e-16	3.86349e-15	None	None	15.6504
PKN2	0.104722	0.697711	0.776117	None	None	0.156324
GTF2B	0.664968	7.97122e-06	2.85584e-05	None	None	5.09848
KYAT3	-0.37344	0.0145441	0.028276	None	None	1.83731
RBMXL1	-0.2006	NA	NA	None	None	NA
GBP3	-2.89408	3.25634e-16	5.46544e-15	None	None	15.4873
GBP1	-1.7419	0.0039009	0.00866943	immune response-regulating cell surface receptor signaling pathway	None	2.40884
GBP2	-2.35252	4.16885e-12	3.96287e-11	None	None	11.38
AC104459.1	-1.5905	0.493197	0.584964	None	None	0.30698
GBP4	-1.72063	0.372158	0.461135	None	None	0.429273
GBP5	-5.29295	0.215062	NA	None	None	0.667436
AL596214.1	4.86238	0.0252172	0.0460668	None	None	1.5983
LRRC8B	2.11339	2.33443e-05	7.80005e-05	None	None	4.63182
LRRC8C-DT	6.62947	5.37411e-10	3.69234e-09	None	None	9.26969
LRRC8C	1.16671	0.452665	0.544822	None	None	0.344223
AC099568.2	6.61844	0.000326159	0.000895788	None	None	3.48657
LRRC8D	4.91333	NA	NA	None	None	NA
ZNF326	1.40392	7.91552e-42	9.65406e-40	None	None	41.1015
AC098656.1	-0.826317	0.845682	NA	None	None	0.0727931
AL627316.1	-0.00364205	0.999341	NA	None	None	0.000286434
LINC02609	0.606629	0.27219	0.353893	None	None	0.565128
AC091614.1	-1.92722	0.661921	NA	None	None	0.179194
ZNF644	-2.20032	6.43506e-22	1.92421e-20	None	None	21.1914
HFM1	-2.21713	3.20586e-05	0.000104393	None	None	4.49406
CDC7	-1.04715	6.10865e-06	2.23023e-05	None	None	5.21405
TGFBR3	-0.958201	6.28677e-05	0.000195511	None	None	4.20157
BRDT	11.5783	1.41425e-18	3.07016e-17	None	None	17.8495
EPHX4	6.15782	7.56345e-05	0.000232271	None	None	4.12128
BTBD8	-0.265218	0.271967	0.353671	None	None	0.565484
C1orf146	4.87043	0.252354	0.333539	None	None	0.59799
GLMN	0.250275	0.166042	0.235561	None	None	0.779781
RPAP2	-0.93024	1.23348e-07	5.8269e-07	None	None	6.90887
GFI1	1.80701	0.418951	0.510617	None	None	0.377837
EVI5	-1.29715	8.24315e-24	2.90517e-22	None	None	23.0839
RPL5	2.59699	2.20396e-10	1.61812e-09	None	ribosome biogenesis	9.6568
DIPK1A	-0.466209	NA	NA	None	None	NA
AC093577.1	-6.80926	0.0836963	0.132061	None	None	1.07729
MTF2	-0.207495	0.129223	0.190638	None	None	0.88866
TMED5	0.704306	0.00907793	0.0185504	None	None	2.04201
CCDC18	2.42805	3.87464e-18	8.11376e-17	None	None	17.4118
CCDC18-AS1	0.254603	0.906908	0.95568	None	None	0.0424368
DR1	-0.247296	0.231027	0.310692	None	None	0.636337
FNBP1L	1.92549	6.90307e-07	2.92211e-06	None	None	6.16096
BCAR3	-1.41592	3.6639e-08	1.87566e-07	None	None	7.43606
AL109613.1	7.94523	1.00384e-11	9.07919e-11	None	None	10.9983
AL049796.1	5.46877	0.0168996	0.0322971	None	None	1.77212
DNTTIP2	0.665406	0.0184937	0.0349814	None	None	1.73298
GCLM	-1.77623	1.03545e-06	4.2726e-06	None	None	5.98487
ABCA4	1.87875	0.0559257	0.0930969	None	None	1.25239
ARHGAP29	0.305519	0.467121	0.559754	None	None	0.33057
ARHGAP29-AS1	-4.22735	0.00129535	0.00318558	None	None	2.88761
AC097059.1	-1.92722	0.661921	NA	None	None	0.179194
ABCD3	-1.54935	4.06002e-15	5.86953e-14	None	None	14.3915
F3	0.0984745	0.906516	0.955467	None	None	0.0426243
SLC44A3	2.6225	1.10121e-19	2.69267e-18	None	None	18.9581
CNN3	0.994825	1.61525e-05	5.52437e-05	None	None	4.79176
AC105942.1	-0.515305	0.544451	0.634757	None	None	0.264041
ALG14	-1.73838	1.45794e-14	1.94948e-13	None	None	13.8363
TLCD4	-0.428146	0.79177	0.857689	None	None	0.101401
AC092802.1	1.76001	0.173696	0.244572	None	None	0.760209
RWDD3	-0.0601409	0.969175	1	None	None	0.0135976
AC092802.4	NA	NA	NA	None	None	NA
LINC01787	-0.00364205	0.999341	NA	None	None	0.000286434
PTBP2	-0.221655	0.263532	0.345066	None	None	0.579166
DPYD	-8.38745	2.09559e-16	3.64177e-15	None	None	15.6787
DPYD-AS1	-6.49492	0.0500654	0.0845231	None	None	1.30046
DPYD-IT1	NA	NA	NA	None	None	NA
MIR137HG	-12.7344	0.00271527	0.00625481	None	None	2.56619
BX005019.1	-5.05494	0.236841	NA	None	None	0.625542
SNX7	0.0600461	0.782766	0.850332	None	None	0.106368
AL445433.2	-0.00364205	0.999341	NA	None	None	0.000286434
PLPPR4	-1.77995	0.684147	NA	None	None	0.164851
LINC01708	3.94195	0.00236551	0.00552631	None	None	2.62607
PALMD	1.5883	0.187377	0.260881	None	None	0.727283
FRRS1	3.74667	4.3784e-16	7.22221e-15	None	None	15.3587
AGL	-0.179636	0.506727	0.598192	None	None	0.295226
AC118553.1	5.82891	0.170333	0.240628	None	None	0.7687
SLC35A3	-0.148234	NA	NA	None	None	NA
MFSD14A	0.513257	NA	NA	None	None	NA
AC093019.2	6.54114	3.54207e-23	1.17819e-21	None	None	22.4507
SASS6	0.988065	1.17881e-06	4.82261e-06	None	None	5.92856
TRMT13	-0.43881	0.055638	0.0927561	None	None	1.25463
LRRC39	1.55343	3.87885e-06	1.45658e-05	None	None	5.4113
DBT	0.362536	0.214828	0.292563	None	None	0.667908
AL445928.2	1.92473	0.182072	0.254605	None	None	0.739757
RTCA-AS1	1.02376	0.392307	0.482596	None	None	0.406373
RTCA	-0.387445	0.351007	0.438943	None	None	0.454684
CDC14A	-1.95252	3.68462e-16	6.15858e-15	None	None	15.4336
AL589990.1	7.46457	1.72962e-08	9.3266e-08	None	None	7.76205
LINC01349	NA	NA	NA	None	None	NA
VCAM1	-1.92722	0.661921	0.743954	cell-substrate adhesion	None	0.179194
EXTL2	0.330553	0.192266	0.266785	None	None	0.716097
AC104506.1	1.56956	0.259585	0.340949	None	None	0.585721
SLC30A7	-1.1594	2.16445e-15	3.27253e-14	None	None	14.6647
DPH5	0.439119	0.10424	0.159221	None	None	0.981964
AC093157.2	NA	NA	NA	None	None	NA
AC093157.1	-0.0671925	0.763814	0.834427	None	None	0.117013
S1PR1	-6.16979	0.147458	0.213332	None	None	0.831331
LINC01307	-9.24428	3.0359e-08	1.57379e-07	None	None	7.51771
LINC01709	NA	NA	NA	None	None	NA
OLFM3	5.26051	0.216138	0.293948	None	None	0.66527
AC099567.1	9.30616	1.87368e-08	1.00442e-07	None	None	7.7273
COL11A1	0.544775	0.434993	0.526797	None	None	0.361518
AC095032.1	-0.757358	0.655288	0.738644	None	None	0.183568
RNPC3	-0.139219	0.305406	0.390469	None	None	0.515123
AMY2B	-1.83167	5.11927e-08	2.57165e-07	None	None	7.29079
AL591888.1	0	1	NA	None	None	0
LINC01676	0	1	1	None	None	0
LINC01677	NA	NA	NA	None	None	NA
AL355306.2	-0.00364205	0.999341	NA	None	None	0.000286434
PRMT6	0.681418	0.641955	0.726341	None	None	0.192495
NTNG1	0.563161	0.595075	0.683161	None	None	0.225428
VAV3	-1.02593	7.82774e-07	3.28863e-06	immune response-regulating cell surface receptor signaling pathway	None	6.10636
VAV3-AS1	NA	NA	NA	None	None	NA
LINC02785	-1.92722	0.661921	NA	None	None	0.179194
SLC25A24	-0.287454	0.470208	0.562706	None	None	0.32771
FAM102B	-1.16012	0.0351118	0.0617379	None	None	1.45455
HENMT1	2.25929	0.0308278	0.0550566	None	None	1.51106
AL160171.1	4.22279	0.0394533	0.0685037	None	None	1.40392
PRPF38B	-0.147283	0.444923	0.536821	None	None	0.351715
FNDC7	0.201754	0.920085	0.966226	None	None	0.0361721
STXBP3	-0.70044	1.19112e-06	4.86803e-06	None	None	5.92404
AKNAD1	0.726099	0.240304	0.320607	None	None	0.619238
SPATA42	-9.35819	6.58487e-06	2.39022e-05	None	None	5.18145
GPSM2	1.10779	7.62558e-10	5.10333e-09	None	None	9.11773
CLCC1	-0.359226	NA	NA	None	None	NA
WDR47	0.677828	0.00780602	0.0161863	None	None	2.10757
TAF13	1.60138	1.53219e-09	9.84162e-09	None	None	8.81469
AL356488.3	1.95679	0.0298574	0.0535756	None	None	1.52495
TMEM167B	0.601069	0.000980187	0.00246566	None	None	3.00869
AL356488.2	-1.58189	0.342802	0.430271	None	None	0.464957
KIAA1324	-0.365207	0.400058	0.490631	None	None	0.397877
SARS	-0.454555	0.00128682	0.00316692	None	None	2.89048
CELSR2	-3.23095	0.000542502	0.00142859	None	None	3.2656
PSRC1	6.43239	2.74216e-05	9.0405e-05	None	None	4.56191
MYBPHL	5.42083	0.202399	0.278399	None	None	0.693792
SORT1	-0.442812	0.0758495	0.121046	None	None	1.12005
PSMA5	-0.407964	7.05264e-05	0.000217914	None	None	4.15165
SYPL2	1.43768	0.612279	0.698815	None	None	0.213051
ATXN7L2	-0.158817	0.929255	0.973874	None	None	0.0318652
CYB561D1	1.08657	2.42427e-07	1.09632e-06	None	None	6.61542
AMIGO1	NA	NA	NA	None	None	NA
GNAI3	0.476022	0.00921019	0.0187952	None	None	2.03573
AL355310.1	NA	NA	NA	None	None	NA
AMPD2	0.609217	0.0824806	0.130388	None	None	1.08365
GSTM4	5.21073	0.0518349	0.0871668	None	None	1.28538
GSTM2	1.76132	NA	NA	None	None	NA
GSTM3	7.25622	9.26885e-08	4.45383e-07	None	None	7.03297
LINC01768	-0.00364205	0.999341	NA	None	None	0.000286434
CSF1	-4.36208	0.219336	0.297494	connective tissue development	None	0.658889
AHCYL1	-0.308656	0.00323754	0.00732541	None	None	2.48979
STRIP1	-0.536479	0.00027496	0.000766384	None	None	3.56073
AL160006.1	-0.00028581	0.999853	1	None	None	6.40482e-05
LINC01397	NA	NA	NA	None	None	NA
SLC6A17	-4.79482	0.156321	0.223933	None	None	0.805983
LINC02586	NA	NA	NA	None	None	NA
KCNC4	-5.42549	8.54732e-07	3.57082e-06	None	None	6.06817
RBM15-AS1	-2.9585	0.0180637	0.0342776	None	None	1.74319
RBM15	0.405556	0.0566216	0.0940763	None	None	1.24702
LAMTOR5-AS1	-0.216506	NA	NA	None	None	NA
SLC16A4	-2.93434	3.96227e-27	1.83725e-25	None	None	26.4021
AL355488.1	0.296224	0.431753	0.523441	None	None	0.364765
LAMTOR5	0.462183	0.0291558	0.0524898	None	None	1.53528
PROK1	NA	NA	NA	None	None	NA
CD53	-5.03401	NA	NA	None	None	NA
AL360270.2	-2.88858	0.0350389	0.0616636	None	None	1.45545
AL360270.1	9.6171	1.10829e-15	1.74108e-14	None	None	14.9553
LRIF1	0.0814285	0.676711	0.756689	None	None	0.169597
AL360270.3	0.116893	0.978581	NA	None	None	0.00940308
DRAM2	-0.489875	0.0298268	0.0535351	None	None	1.52539
CEPT1	-0.81623	0.000659498	0.00171248	None	None	3.18079
AL355816.2	4.84049	1.76939e-05	6.0056e-05	None	None	4.75218
DENND2D	-0.153931	0.603587	0.691168	None	None	0.21926
CHI3L2	1.02325	0.465285	0.557826	None	carbohydrate derivative catabolic process	0.332281
PIFO	-0.222588	0.865191	0.92083	None	None	0.0628882
OVGP1	0.888584	0.00179743	0.00430204	None	None	2.74535
AL390195.2	6.37135	0.000482423	0.00128349	None	None	3.31657
AL390195.1	1.10872	0.554669	0.644615	None	None	0.255966
WDR77	0.576086	0.0221602	0.0410675	None	None	1.65443
ATP5PB	-0.240642	0.147161	0.213024	None	None	0.832208
C1orf162	-2.18781	0.131634	0.193612	None	None	0.880633
TMIGD3	3.12076	0.225387	0.304409	None	None	0.647071
ADORA3	NA	NA	NA	None	None	NA
RAP1A	-0.159477	0.404081	0.494933	None	None	0.393531
LINC01160	NA	NA	NA	None	None	NA
INKA2	3.65002	2.45108e-19	5.7826e-18	None	None	18.6106
INKA2-AS1	-0.00364205	0.999341	NA	None	None	0.000286434
AL049557.1	-0.00364205	0.999341	NA	None	None	0.000286434
DDX20	0.373223	0.0849206	0.133678	None	None	1.07099
KCND3	4.94073	0.0865158	0.135839	None	None	1.0629
AL445426.1	-5.63987	0.186005	NA	None	None	0.730474
CTTNBP2NL	-1.39251	1.9385e-12	1.92643e-11	None	None	11.7125
WNT2B	-1.9591	1.84635e-10	1.37513e-09	connective tissue development	None	9.73369
ST7L	-1.40211	1.02302e-11	9.24024e-11	None	None	10.9901
CAPZA1	0.548133	1.43333e-06	5.77925e-06	None	None	5.84366
MOV10	-1.70091	1.26603e-35	1.04846e-33	None	None	34.8976
AL603832.1	5.6369	0.0702618	0.113188	None	None	1.15328
RHOC	-0.666184	0.0393501	0.0683599	None	None	1.40505
PPM1J	-1.92722	0.661921	NA	None	None	0.179194
LINC01356	-1.22681	0.109427	0.165858	None	None	0.960877
LINC01357	-1.58156	0.435424	0.527161	None	None	0.361088
SLC16A1	2.54368	7.29451e-23	2.37532e-21	None	None	22.137
SLC16A1-AS1	-2.08636	1.87505e-15	2.86077e-14	None	None	14.727
AL390242.1	6.94367	3.21754e-07	1.43125e-06	None	None	6.49248
LRIG2-DT	0.0760243	NA	NA	None	None	NA
LRIG2	-0.410518	0.00108225	0.00269679	None	None	2.96567
MAGI3	-1.70462	7.67862e-06	2.75937e-05	None	None	5.11472
PHTF1	0.32899	0.25598	0.337461	None	None	0.591794
RSBN1	-0.272456	0.010887	0.0218805	None	None	1.96309
AL137856.1	2.69818	0.19694	0.272349	None	None	0.705666
PTPN22	-1.45225	0.385021	0.474736	immune response-regulating cell surface receptor signaling pathway	None	0.414515
AP4B1-AS1	5.52341	0.00108019	0.00269331	None	None	2.9665
BCL2L15	0	1	NA	None	None	0
AP4B1	-1.14286	0.212762	0.290162	None	None	0.672105
DCLRE1B	5.6323	0.00524952	0.0113398	None	None	2.27988
HIPK1-AS1	5.95861	0.00877049	0.0179659	None	None	2.05698
HIPK1	-0.360459	0.0392431	0.0681917	None	None	1.40624
OLFML3	-1.91322	0.545192	0.635547	None	None	0.26345
SYT6	NA	NA	NA	None	None	NA
TRIM33	-0.216364	0.406003	0.497013	None	None	0.391471
BCAS2	2.29346	7.01332e-18	1.43577e-16	None	None	17.1541
DENND2C	3.8769	9.45244e-11	7.35864e-10	None	None	10.0245
AMPD1	0	1	NA	None	None	0
NRAS	1.04796	6.36746e-07	2.70694e-06	None	None	6.19603
CSDE1	-0.368856	0.00640074	0.0135317	None	None	2.19377
SIKE1	1.25346	5.71241e-09	3.33208e-08	None	None	8.24318
SYCP1	NA	NA	NA	None	None	NA
TSPAN2	6.41563	0.00700537	0.0146728	None	None	2.15457
NGF-AS1	6.8935	9.90383e-06	3.49412e-05	None	None	5.0042
NGF	8.24163	2.71462e-07	1.21967e-06	None	None	6.56629
VANGL1	2.60679	0.00136285	0.00334056	None	None	2.86555
CASQ2	-0.00364205	0.999341	NA	None	None	0.000286434
SLC22A15	-2.51472	9.2744e-10	6.14547e-09	None	None	9.03271
MAB21L3	8.56158	1.93886e-11	1.6753e-10	None	None	10.7125
AL355538.1	-3.29808	0.446753	NA	None	None	0.349932
ATP1A1	-0.179117	0.583992	0.672672	None	None	0.233593
ATP1A1-AS1	-0.561189	0.7092	0.7859	None	None	0.149231
LINC01762	-0.386601	0.442596	0.534526	None	None	0.353992
AL390066.1	-2.71748	0.534744	NA	None	None	0.271854
AL390066.2	-3.32331	0.443125	NA	None	None	0.353473
CD58	0.323605	0.239807	0.320103	None	None	0.620138
IGSF3	-0.0775229	0.719424	0.794779	None	None	0.143015
CD2	-5.37911	0.207552	NA	None	None	0.682872
AL157904.1	0	1	NA	None	None	0
PTGFRN	-3.59983	7.01636e-13	7.46659e-12	None	None	12.1539
CD101	-4.36788	6.91697e-05	0.000213919	None	None	4.16008
AL445231.1	-1.5458	0.370081	0.459043	None	None	0.431703
TTF2	-0.89173	7.77018e-05	0.000238219	None	None	4.10957
TRIM45	-2.98455	1.83737e-09	1.16384e-08	None	None	8.7358
VTCN1	-1.56225	0.0615461	0.101032	immune response-regulating cell surface receptor signaling pathway	None	1.2108
LINC01525	0.655071	0.744372	0.816914	None	None	0.12821
AL358072.1	-1.4827	0.329566	0.416582	None	None	0.482058
MAN1A2	-1.9309	6.04247e-18	1.24461e-16	None	None	17.2188
TENT5C	3.61169	0.00828046	0.0170576	None	None	2.08195
GDAP2	-0.516936	0.00203075	0.00480447	None	None	2.69234
WDR3	1.75333	2.02557e-09	1.27263e-08	None	ribosome biogenesis	8.69345
SPAG17	3.53916	3.74565e-10	2.64111e-09	None	None	9.42647
TBX15	-1.40172	0.323694	0.410306	None	None	0.489866
WARS2	-0.326929	0.219511	0.297671	None	None	0.658543
WARS2-AS1	-0.769743	NA	NA	None	None	NA
AL359915.1	5.00683	1.24344e-08	6.88388e-08	None	None	7.90538
LINC01780	0	1	NA	None	None	0
HSD3B2	NA	NA	NA	None	None	NA
HSD3B1	-1.371	8.27127e-08	4.00508e-07	None	None	7.08243
LINC00622	-0.838073	0.706363	0.783446	None	None	0.150972
ZNF697	-0.0998446	0.720781	0.795746	None	None	0.142197
PHGDH	4.2484	3.74715e-15	5.44853e-14	None	None	14.4263
HMGCS2	-6.87628	1.83545e-06	7.28676e-06	connective tissue development	None	5.73626
NOTCH2	-2.32573	4.05957e-11	3.33448e-10	None	None	10.3915
SEC22B	-0.598379	0.00557058	0.0119589	None	None	2.2541
NBPF26	0.611953	0.141966	0.206496	None	None	0.847817
AC253572.2	7.86551	0.000265899	0.000743704	None	None	3.57528
LINC00623	1.81932	0.00194609	0.00462101	None	None	2.71084
FCGR1B	-3.30653	0.445537	NA	None	None	0.351116
AC244453.3	5.18731	0.0101225	0.0204872	None	None	1.99471
AC244453.2	0	1	NA	None	None	0
AC244453.1	0	1	1	None	None	0
FAM72B	5.05229	0.234971	0.314923	None	None	0.628985
SRGAP2C	-0.449361	0.09212	0.14344	None	None	1.03565
LINC02798	-2.33186	0.131339	0.193263	None	None	0.881607
AC239800.2	NA	NA	NA	None	None	NA
LINC02591	1.1991	0.543056	0.633276	None	None	0.265156
HIST2H3PS2	6.92353	0.00376183	0.00839374	None	None	2.4246
AC246680.1	0	1	1	None	None	0
LINC02802	-1.13082	0.380567	0.470022	None	None	0.419569
NBPF15	0.774277	0.261894	0.343426	None	None	0.581874
FP700111.1	0.91196	0.566441	0.655608	None	None	0.246845
SRGAP2B	-0.557933	0.0959441	0.148556	None	None	1.01798
FAM72D	3.86983	0.363971	NA	None	None	0.438933
NBPF20	4.08887	0.0927482	0.144218	None	None	1.03269
GPR89A	1.5902	1.13339e-12	1.16906e-11	None	None	11.9456
PDZK1	7.82736	7.08555e-07	2.99181e-06	None	None	6.14963
CD160	4.07173	0.00115317	0.00286182	None	None	2.9381
RNF115	-1.79571	1.09535e-11	9.85375e-11	None	None	10.9604
POLR3C	-0.109047	0.569004	0.658044	None	None	0.244885
NUDT17	7.33487	6.37948e-05	0.00019818	None	None	4.19521
PIAS3	0.364759	0.0905803	0.141327	None	None	1.04297
ANKRD35	NA	NA	NA	None	None	NA
ITGA10	-1.98643	0.246285	0.327252	cell-substrate adhesion	None	0.608562
PEX11B	-0.596546	0.110275	0.166918	None	None	0.957522
RBM8A	1.26547	5.98998e-09	3.48489e-08	None	None	8.22257
LIX1L-AS1	3.58795	1.99646e-07	9.14565e-07	None	None	6.69974
LIX1L	1.19169	0.4691	0.56158	None	None	0.328735
ANKRD34A	5.49614	0.196171	0.271453	None	None	0.707366
POLR3GL	4.73057	0.0134958	0.02645	None	None	1.8698
TXNIP	-11.139	1.77828e-17	3.47475e-16	None	None	16.75
HJV	-0.00364205	0.999341	NA	None	None	0.000286434
AC239799.2	9.44871	6.26241e-13	6.68921e-12	None	None	12.2033
LINC01719	-0.91424	0.0125714	0.0248587	None	None	1.90062
NBPF10	-2.3051	1.81525e-06	7.20943e-06	None	None	5.74106
NOTCH2NLA	-1.51427	NA	NA	None	None	NA
AC239799.1	NA	NA	NA	None	None	NA
AC245407.2	7.83218	NA	NA	None	None	NA
NBPF12	0.305939	0.367557	0.456362	None	None	0.434675
PRKAB2	2.784	2.65672e-15	3.96028e-14	None	None	14.5757
AC242426.2	-0.876932	0.00211693	0.0049889	None	None	2.67429
FMO5	5.03261	7.48781e-13	7.94332e-12	None	None	12.1256
CHD1L	3.71492	0.127676	0.188688	None	None	0.893889
LINC00624	3.12941	NA	NA	None	None	NA
BCL9	1.15271	2.67137e-06	1.03342e-05	None	None	5.57327
ACP6	1.55666	1.43365e-08	7.84844e-08	None	None	7.84356
GJA5	-0.687771	0.197388	0.272819	None	None	0.704679
GPR89B	2.48921	4.37149e-21	1.2084e-19	None	None	20.3594
LINC02804	4.92007	0.0491257	0.0831389	None	None	1.30869
NBPF11	-0.474232	0.0110328	0.0221426	None	None	1.95731
LINC02805	5.98844	0.024882	0.0455258	None	None	1.60412
AC239809.3	-4.21646	1.05005e-06	4.32928e-06	None	None	5.97879
LINC01731	-4.05087	0.000886528	0.00224691	None	None	3.05231
LINC01138	-0.277552	NA	NA	None	None	NA
LINC02806	-4.62932	0.0141585	0.0276064	None	None	1.84898
AC245100.1	-4.73723	0.0015381	0.00373329	None	None	2.81302
AC245100.6	0	1	1	None	None	0
PPIAL4G	0	1	NA	None	None	0
NBPF14	-2.06365	2.58346e-07	1.1636e-06	None	None	6.5878
NUDT4B	NA	NA	NA	None	None	NA
PDE4DIP	-1.46502	0.000835012	0.00212652	None	None	3.07831
AC239804.1	0	NA	NA	None	None	NA
NBPF9	-1.17176	0.000734662	0.00189082	None	None	3.13391
AC245297.3	0.0270064	0.946	0.987566	None	None	0.0241089
NOTCH2NLC	-1.82451	NA	NA	None	None	NA
NBPF19	-3.06978	5.35678e-07	2.30391e-06	None	None	6.2711
AC242842.1	NA	NA	NA	None	None	NA
FCGR1A	0.00193141	0.999647	NA	None	None	0.000153434
HIST2H2BF	0.276442	0.392808	0.483124	None	None	0.40582
AC243772.2	-0.820105	0.655782	0.738995	None	None	0.18324
HIST2H4A	-0.788332	0.855613	NA	None	None	0.0677225
HIST2H2AA4	8.44722	1.30241e-11	1.15614e-10	None	None	10.8853
HIST2H4B	6.28489	0.139201	0.20308	None	None	0.856356
AC239868.1	-1.83501	0.324736	0.411523	None	None	0.48847
HIST2H2BE	0.0769812	0.707395	0.784461	None	None	0.150338
HIST2H2AC	1.13867	0.00654771	0.0138153	None	None	2.18391
HIST2H2AB	5.8986	0.0914272	0.142571	None	None	1.03892
BOLA1	-0.786398	0.000667585	0.00173192	None	None	3.17549
SV2A	5.66244	0.0571931	0.0949475	None	None	1.24266
SF3B4	1.32578	1.61892e-05	5.53502e-05	None	None	4.79077
MTMR11	-0.64413	0.00503154	0.0109122	None	None	2.2983
OTUD7B	-1.36089	3.18741e-16	5.37665e-15	None	None	15.4966
AC244033.2	3.33462	0.099869	0.153581	None	None	1.00057
VPS45	-0.932802	4.57995e-05	0.000145742	None	None	4.33914
PLEKHO1	-2.88098	0.00474629	0.0103527	None	None	2.32365
AC242988.2	NA	NA	NA	None	None	NA
ANP32E	2.63998	3.95577e-38	4.04091e-36	None	None	37.4028
AC242988.1	0	1	NA	None	None	0
APH1A	0.118902	0.640895	0.725427	None	None	0.193213
C1orf54	1.39157	0.00183921	0.00439055	None	None	2.73537
CIART	NA	NA	NA	None	None	NA
MRPS21	1.29999	9.08328e-16	1.44728e-14	None	None	15.0418
PRPF3	-1.18775	2.60036e-20	6.78724e-19	None	None	19.585
RPRD2	-1.01509	1.22579e-14	1.66001e-13	None	None	13.9116
TARS2	-0.120463	0.673106	0.753411	None	None	0.171917
ECM1	0.357192	0.509527	0.600898	None	None	0.292833
FALEC	1.41172	0.151343	0.21798	None	None	0.820038
AL356356.1	-0.330844	0.3581	0.446328	None	None	0.445995
ADAMTSL4	-2.46326	5.40763e-21	1.4826e-19	extracellular matrix organization	None	20.267
ADAMTSL4-AS1	0.273175	0.895552	0.946298	None	None	0.0479092
MCL1	1.6524	1.28677e-10	9.8348e-10	None	intrinsic apoptotic signaling pathway in response to DNA damage	9.8905
ENSA	-0.757093	4.41643e-14	5.48619e-13	None	None	13.3549
GOLPH3L	-0.42938	0.0161059	0.0309595	None	None	1.79301
HORMAD1	-4.94988	0.0171872	0.0327844	None	None	1.76479
CTSS	-3.48151	2.96792e-05	9.71793e-05	extracellular matrix organization	None	4.52755
CTSK	-1.48394	4.74676e-10	3.3019e-09	connective tissue development	None	9.3236
ARNT	-1.33428	1.00677e-11	9.10159e-11	None	None	10.9971
CTXND2	1.01913	0.373729	0.462655	None	None	0.427444
SETDB1	-0.324225	0.022855	0.0422151	None	None	1.64102
CERS2	-0.299087	0.20156	0.277442	None	None	0.695595
ANXA9	7.58538	9.7517e-06	3.44672e-05	None	None	5.01092
MINDY1	-0.614019	0.506281	0.597805	None	None	0.295608
PRUNE1	-0.360744	0.0909305	0.14183	None	None	1.04129
BNIPL	1.13533	0.0201213	0.0376916	None	None	1.69634
C1orf56	3.93091	0.000312111	0.000861225	None	None	3.50569
CDC42SE1	-1.05062	5.81377e-21	1.58747e-19	None	None	20.2355
MLLT11	6.68656	3.83496e-05	0.000123381	None	intrinsic apoptotic signaling pathway in response to DNA damage	4.41624
GABPB2	-4.07871	1.12722e-35	9.44072e-34	None	None	34.948
SEMA6C	-0.0569457	0.971014	1	None	None	0.0127745
SCNM1	1.29152	8.41104e-07	3.51754e-06	None	None	6.07515
LYSMD1	-0.0938322	0.654073	0.73744	None	None	0.184374
VPS72	-0.449546	0.0142682	0.0278014	None	None	1.84563
PIP5K1A	-1.58281	2.44613e-10	1.78614e-09	cell-substrate adhesion	None	9.61152
PSMD4	0.656138	2.02825e-05	6.81866e-05	None	None	4.69288
ZNF687-AS1	7.23959	1.42894e-08	7.82474e-08	None	None	7.84499
ZNF687	0.379137	0.154412	0.221734	None	None	0.811319
PI4KB	-1.04101	1.59177e-17	3.13125e-16	None	None	16.7981
RFX5	4.90837	0.014952	0.0289788	None	None	1.8253
SELENBP1	3.3629	0.135114	0.198036	None	None	0.869299
PSMB4	1.14158	0.00102413	0.00256705	None	None	2.98964
POGZ	-1.75747	1.15446e-13	1.36555e-12	None	None	12.9376
CGN	2.60493	0.00111242	0.00276784	None	None	2.95373
TUFT1	-0.437826	0.259255	0.340732	None	None	0.586273
AL365436.2	3.10139	0.00263056	0.00608196	None	None	2.57995
SNX27	-0.493498	0.00311198	0.00706754	None	None	2.50696
AL391335.1	8.86418	8.54304e-12	7.811e-11	None	None	11.0684
AL589765.1	0.522262	0.903953	NA	None	None	0.0438541
RIIAD1	NA	NA	NA	None	None	NA
MRPL9	0.934744	1.63819e-05	5.59426e-05	None	None	4.78563
OAZ3	4.20409	0.0507035	0.0854785	None	None	1.29496
AL589765.4	-0.00364205	0.999341	NA	None	None	0.000286434
TDRKH	1.915	7.00107e-10	4.71045e-09	None	None	9.15484
TDRKH-AS1	2.47926	0.0884764	0.138474	None	None	1.05317
RORC	6.30581	0.000778321	0.00199502	None	None	3.10884
C2CD4D	6.56923	0.0369709	0.0645779	None	None	1.43214
C2CD4D-AS1	0.441119	0.798143	0.863122	None	None	0.097919
THEM5	8.34184	1.45062e-06	5.84429e-06	None	None	5.83845
THEM4	1.85288	8.95433e-08	4.313e-07	None	None	7.04797
AL450992.3	3.90403	0.359705	NA	None	None	0.444053
S100A10	3.04269	1.34943e-06	5.46289e-06	None	None	5.86985
AL450992.1	7.11875	7.3024e-10	4.90008e-09	None	None	9.13653
S100A11	2.6228	6.51235e-20	1.64435e-18	None	None	19.1863
TCHHL1	1.12596	0.784372	NA	None	None	0.105478
TCHH	-3.44964	3.78325e-06	1.42413e-05	None	None	5.42214
FLG-AS1	-2.05353	0.327716	0.414543	None	None	0.484502
CRCT1	-7.13797	0.0672698	0.1089	None	None	1.17218
IVL	NA	NA	NA	None	None	NA
AL161636.1	NA	NA	NA	None	None	NA
PGLYRP4	0.4861	0.836522	NA	None	None	0.0775227
S100A9	2.18726	1.64049e-06	6.55152e-06	None	intrinsic apoptotic signaling pathway in response to DNA damage	5.78503
S100A8	-3.01408	0.488737	NA	None	None	0.310924
S100A6	2.78129	3.70301e-15	5.38977e-14	None	None	14.4314
S100A4	4.32467	0.000215645	0.000612685	None	None	3.66626
S100A2	NA	NA	NA	None	None	NA
BX470102.2	-2.0417	0.184607	0.257685	None	None	0.733751
S100A16	2.57751	0.211166	0.288453	None	None	0.675377
S100A13	-0.502223	0.247094	0.328197	None	None	0.607138
AL162258.2	0.18916	0.817046	0.879405	None	None	0.0877533
CHTOP	-1.11866	6.76289e-21	1.83666e-19	None	None	20.1699
SNAPIN	2.59459	8.74311e-07	3.64882e-06	None	None	6.05833
ILF2	0.51558	0.0105561	0.0212729	None	None	1.9765
NPR1	3.42642	2.89906e-05	9.51413e-05	None	None	4.53774
INTS3	-0.322963	0.256685	0.338177	None	None	0.5906
SLC27A3	0.23689	0.85559	0.91269	None	None	0.0677341
GATAD2B	-1.984	4.14092e-136	1.38886e-132	None	None	135.383
AL358472.5	7.22518	4.97271e-06	1.83616e-05	None	None	5.30341
DENND4B	-0.264195	0.272296	0.353923	None	None	0.564959
CRTC2	-0.0251639	0.920316	0.966295	None	None	0.0360632
SLC39A1	0.57499	0.0635368	0.103784	None	None	1.19697
AL358472.4	0.488764	0.564135	0.653563	None	None	0.248617
AL358472.3	4.38111	0.115175	NA	None	None	0.938641
CREB3L4	0.619823	0.319831	0.406024	None	None	0.495079
JTB	1.12844	2.53197e-13	2.84655e-12	None	None	12.5965
AL358472.2	5.12785	0.228007	0.307369	None	None	0.642052
RAB13	1.57161	1.26329e-12	1.2931e-11	None	None	11.8985
RPS27	2.94068	NA	NA	None	ribosome biogenesis	NA
NUP210L	2.20013	4.0559e-08	2.06269e-07	None	None	7.39191
TPM3	0.931089	1.58002e-10	1.19356e-09	None	None	9.80134
C1orf189	0.642747	0.66542	0.746803	None	None	0.176904
C1orf43	-0.0753702	0.620213	0.706308	None	None	0.207459
UBAP2L	-1.11636	2.66358e-16	4.53484e-15	None	None	15.5745
HAX1	2.03863	2.90579e-14	3.70806e-13	None	None	13.5367
ATP8B2	-0.302198	0.837391	0.896985	None	None	0.0770719
IL6R-AS1	-7.46102	0.0793151	0.125958	None	None	1.10064
IL6R	-2.03601	0.109813	0.166281	connective tissue development	None	0.959348
SHE	-7.82231	0.000205587	0.000585928	None	None	3.687
TDRD10	-7.10778	0.0183677	0.0347692	None	None	1.73595
UBE2Q1	-1.22775	6.54663e-06	2.37806e-05	None	None	5.18398
ADAR	-0.503674	0.0921568	0.143464	None	None	1.03547
KCNN3	-1.26084	0.404233	0.495058	None	None	0.393368
PMVK	2.38238	5.27745e-30	2.95009e-28	None	None	29.2776
AL451085.1	6.42602	0.0290158	0.0522706	None	None	1.53736
PBXIP1	0.296479	0.388698	0.478794	None	None	0.410387
PYGO2	0.598337	0.000832666	0.00212135	None	None	3.07953
AL451085.2	6.35843	0.0309326	0.0552095	None	None	1.50958
SHC1	-0.479158	0.3665	0.455162	None	None	0.435926
CKS1B	1.2923	0.000762437	0.0019563	None	None	3.1178
FLAD1	0.347579	0.0991244	0.152693	None	None	1.00382
ZBTB7B	-0.604909	0.0024176	0.00563621	None	None	2.61662
DCST2	1.82862	0.0794533	0.126147	None	None	1.09989
DCST1	5.03309	0.01633	0.0313364	None	None	1.78701
ADAM15	3.12453	3.55632e-22	1.08938e-20	None	None	21.449
EFNA4	6.05209	NA	NA	None	None	NA
EFNA1	2.2406	4.32098e-07	1.8846e-06	None	None	6.36442
SLC50A1	2.89803	6.38219e-27	2.88618e-25	None	None	26.195
DPM3	1.85111	0.0301509	0.0540204	None	None	1.5207
KRTCAP2	0.649058	0.559082	0.64877	None	None	0.252525
TRIM46	6.7354	4.1946e-06	1.56522e-05	None	None	5.37731
MUC1	-9.41551	0.0266751	0.0484792	None	None	1.57389
AC234582.1	7.17782	NA	NA	None	None	NA
THBS3	-0.324479	0.305921	0.390979	None	None	0.514391
MTX1	1.22669	7.22464e-05	0.00022275	None	None	4.14118
GBA	1.67737	1.32187e-06	5.36209e-06	None	None	5.87881
FAM189B	-0.666368	0.0017854	0.00427528	None	None	2.74826
SCAMP3	1.22241	7.1694e-07	3.02594e-06	None	None	6.14452
CLK2	-0.0714407	0.635562	0.720485	None	None	0.196842
HCN3	0.654296	0.746882	0.819222	None	None	0.126748
PKLR	-0.00364207	0.999176	1	None	None	0.000358146
FDPS	3.50531	1.44557e-16	2.5563e-15	None	None	15.84
RUSC1-AS1	-0.486389	0.707319	0.78442	None	None	0.150385
RUSC1	0.341555	0.279847	0.362303	None	None	0.55308
ASH1L	-0.900685	5.85812e-17	1.07957e-15	None	None	16.2322
ASH1L-IT1	0	1	NA	None	None	0
ASH1L-AS1	2.53997	0.0292585	0.0526606	None	None	1.53375
MSTO1	2.6922	0.000750371	0.00192805	None	None	3.12472
AL353807.5	2.11942	0.111058	0.167914	None	None	0.95445
YY1AP1	-0.575526	8.72438e-05	0.00026493	None	None	4.05927
DAP3	1.25145	2.67178e-05	8.82726e-05	None	None	4.5732
GON4L	-0.710442	4.34394e-06	1.61735e-05	None	None	5.36212
SYT11	-1.11599	0.796704	NA	None	None	0.0987029
RIT1	-0.388645	0.0664212	0.107708	None	None	1.17769
KHDC4	-0.267133	0.0940128	0.145913	None	None	1.02681
ARHGEF2	-1.89767	1.50334e-14	2.0022e-13	None	None	13.8229
AL355388.2	-6.99306	0.00798389	0.0165177	None	None	2.09779
AL355388.1	NA	NA	NA	None	None	NA
AL355388.3	8.9871	1.81875e-10	1.35759e-09	None	None	9.74023
SSR2	1.91053	2.13411e-09	1.33417e-08	None	None	8.67078
UBQLN4	-0.978059	0.000197721	0.000565111	None	None	3.70395
LAMTOR2	0.871022	0.000505378	0.00133836	None	None	3.29638
RAB25	1.51486	3.0442e-10	2.17827e-09	None	None	9.51653
MEX3A	4.96563	0.0129584	0.0255212	None	None	1.88745
LMNA	-0.555359	0.0270673	0.0491388	None	None	1.56755
SEMA4A	-3.36194	1.47465e-07	6.88508e-07	mesenchyme development	None	6.83131
SLC25A44	0.432845	0.0525262	0.0881672	None	None	1.27962
PMF1	-1.78437	NA	NA	None	None	NA
BGLAP	-1.35403	0.410381	0.501611	None	None	0.386812
PAQR6	-1.33539	0.321444	0.407763	None	None	0.492894
SMG5	-0.277764	0.257259	0.338748	None	None	0.589629
TMEM79	0.54985	0.000296155	0.000820686	None	None	3.52848
GLMP	1.52608	1.26327e-12	1.2931e-11	None	None	11.8985
CCT3	0.0582616	0.651649	0.735192	None	None	0.185986
TSACC	8.01668	8.98982e-11	7.0175e-10	None	None	10.0462
C1orf61	2.65454	0.000155138	0.000451742	None	None	3.80928
MEF2D	-1.46343	4.07559e-25	1.58334e-23	connective tissue development	None	24.3898
AL365181.1	NA	NA	NA	None	None	NA
IQGAP3	2.14678	0.00922453	0.0188213	None	None	2.03506
NAXE	1.10108	0.115637	0.173781	None	None	0.936903
GPATCH4	1.96349	1.10388e-15	1.73551e-14	None	None	14.9571
NES	-0.863475	0.679789	0.759498	None	None	0.167626
AL590666.3	NA	NA	NA	None	None	NA
CRABP2	5.37644	0.0664269	0.107709	None	None	1.17766
AL590666.1	NA	NA	NA	None	None	NA
ISG20L2	0.891019	3.29591e-06	1.25548e-05	None	None	5.48202
RRNAD1	-0.335062	0.031196	0.0556353	None	None	1.5059
MRPL24	1.67799	0.0129673	0.0255339	None	None	1.88715
HDGF	-0.60937	0.00145151	0.00354004	None	None	2.83818
PRCC	-1.26305	2.98319e-28	1.50084e-26	None	None	27.5253
SH2D2A	1.59209	0.712615	NA	None	None	0.147145
NTRK1	-4.0905	0.338458	NA	None	None	0.470495
INSRR	NA	NA	NA	None	None	NA
PEAR1	-6.19681	0.00162239	0.00391615	None	None	2.78984
LRRC71	NA	NA	NA	None	None	NA
ARHGEF11	-2.04907	3.78881e-12	3.62213e-11	None	None	11.4215
ETV3L	-4.04694	0.346576	NA	None	None	0.460201
ETV3	0.732253	8.76283e-05	0.000265938	None	None	4.05736
LINC02772	-4.05732	0.345299	NA	None	None	0.461805
FCRL5	-3.87515	0.368164	NA	None	None	0.433959
FCRL3	-3.31494	0.444328	NA	immune response-regulating cell surface receptor signaling pathway	None	0.352297
FCRL2	-3.31494	0.444328	NA	None	None	0.352297
FCRL1	-6.68242	0.116355	0.174715	None	None	0.934213
CD5L	0	1	NA	None	None	0
KIRREL1	-8.07062	2.19668e-09	1.36876e-08	None	None	8.65823
CD1D	NA	NA	NA	None	None	NA
AL138899.1	NA	NA	NA	None	None	NA
OR10K1	NA	NA	NA	None	None	NA
SPTA1	-9.41086	2.2865e-10	1.67322e-09	None	None	9.64083
MNDA	-5.73283	0.178745	0.250701	immune response-regulating cell surface receptor signaling pathway	None	0.747766
PYHIN1	-7.97096	0.00468399	0.0102324	None	None	2.32938
IFI16	-2.69645	4.2128e-08	2.13763e-07	None	None	7.37543
AIM2	-1.92722	0.661921	0.743954	None	None	0.179194
CADM3	-5.87627	0.167965	0.237836	None	None	0.774782
CADM3-AS1	-1.92722	0.661921	NA	None	None	0.179194
ACKR1	0	1	NA	None	None	0
AL513323.1	-4.51875	0.291629	NA	None	None	0.535169
DUSP23	5.81183	0.171594	0.242106	None	None	0.765498
FCRL6	-2.72965	0.532815	NA	None	None	0.273423
SLAMF8	NA	NA	NA	None	None	NA
AL590560.2	NA	NA	NA	None	None	NA
VSIG8	NA	NA	NA	None	None	NA
AL590560.3	-1.92722	0.661921	NA	None	None	0.179194
CFAP45	-1.79781	9.53262e-06	3.37856e-05	None	None	5.02079
TAGLN2	-1.33101	0.0137328	0.0268649	None	None	1.86224
IGSF9	-2.77474	0.519905	NA	None	None	0.284076
LINC01133	0.522192	0.901484	NA	None	None	0.0450421
KCNJ10	4.52821	0.287464	NA	None	None	0.541416
PIGM	-0.681899	0.551008	0.641136	None	None	0.258842
IGSF8	1.24996	0.119646	0.178856	None	None	0.922102
ATP1A2	0	1	NA	None	None	0
ATP1A4	-2.9718	0.200477	0.276168	None	None	0.697935
CASQ1	-4.86777	0.0305385	0.0546176	None	None	1.51515
AL121987.2	5.94424	0.00217761	0.00512122	None	None	2.66202
PEA15	-0.47089	0.0172251	0.0328411	None	None	1.76384
DCAF8	-0.765514	0.102648	0.157123	None	None	0.988648
AL139011.1	5.58286	0.134327	0.197026	None	None	0.871838
PEX19	0.0314671	0.983153	1	None	None	0.00737904
COPA	0.0823538	0.57221	0.661372	None	None	0.242444
NCSTN	-0.157632	0.47413	0.566636	None	None	0.324102
NHLH1	0.165129	0.969188	NA	None	None	0.013592
VANGL2	-2.72965	0.532815	NA	None	None	0.273423
SLAMF6	-6.18612	0.146377	0.212012	None	None	0.834528
CD84	-6.94796	0.102427	0.156819	None	None	0.989587
SLAMF1	-4.71706	0.270427	NA	None	None	0.567949
AL121985.1	-3.71078	0.389604	NA	None	None	0.409377
CD48	-3.80115	0.377721	NA	None	None	0.422829
SLAMF7	-2.71748	0.534744	NA	None	None	0.271854
LY9	-3.51682	0.415879	NA	None	None	0.381033
CD244	-3.71725	0.388744	NA	None	None	0.410336
F11R	0.577875	0.350023	0.43786	None	None	0.455904
TSTD1	3.78015	0.0219216	0.0406665	None	None	1.65913
USF1	1.0662	0.00106101	0.00265074	None	None	2.97428
ARHGAP30	0.470922	0.367102	0.455826	None	None	0.435213
NECTIN4	1.66593	3.23512e-06	1.23419e-05	None	None	5.49011
AL591806.1	-5.29857	0.00148577	0.00361763	None	None	2.82805
KLHDC9	-6.17473	0.0229248	0.0423402	None	None	1.63969
PFDN2	0.347063	0.113476	0.171081	None	None	0.945095
NIT1	0.859117	0.00398844	0.00885127	None	None	2.3992
DEDD	-1.06854	1.58628e-12	1.59373e-11	None	None	11.7996
UFC1	1.07371	3.0341e-06	1.16359e-05	None	None	5.51797
AL590714.1	7.15539	0.000225699	0.000638545	None	None	3.64647
USP21	-1.29565	5.40331e-12	5.04576e-11	None	None	11.2673
PPOX	-0.00981765	0.96518	1	None	None	0.0153918
B4GALT3	-0.288815	0.0863804	0.13569	None	None	1.06358
ADAMTS4	0.841174	0.847455	NA	None	None	0.0718834
NDUFS2	0.548395	0.0465151	0.0792608	None	None	1.33241
FCER1G	-6.53869	0.124498	0.184819	immune response-regulating cell surface receptor signaling pathway	None	0.904836
TOMM40L	-0.771695	0.659748	0.74259	None	None	0.180622
NR1I3	6.02457	0.0345745	0.060975	None	None	1.46124
PCP4L1	0.225007	0.671761	0.752116	None	None	0.172785
MPZ	5.27334	0.00544758	0.0117273	None	None	2.2638
SDHC	0.25116	0.188585	0.262363	None	None	0.724494
AL592295.4	-0.499895	0.59291	0.681112	None	None	0.227011
AL592295.5	1.53151	0.445364	0.537189	None	None	0.351285
AL592295.3	6.10499	0.00182561	0.00436221	None	None	2.73859
FCGR2A	-6.75263	4.1993e-08	2.13185e-07	None	None	7.37682
HSPA6	-6.21793	0.144288	0.209438	None	None	0.84077
FCGR3A	-2.95663	0.0362361	0.0634652	immune response-regulating cell surface receptor signaling pathway	None	1.44086
FCGR3B	1.45673	0.377568	0.466762	None	None	0.423005
FCGR2B	-4.61847	4.69393e-05	0.000149085	immune response-regulating cell surface receptor signaling pathway	None	4.32846
DUSP12	0.978077	9.61325e-07	3.9806e-06	None	None	6.01713
ATF6	-1.30475	1.89949e-08	1.01717e-07	None	None	7.72136
OLFML2B	-7.25655	0.0454161	0.0775918	extracellular matrix organization	None	1.34279
NOS1AP	-0.916912	0.0346391	0.0610668	None	None	1.46043
C1orf226	-8.22964	9.5692e-07	3.96644e-06	None	None	6.01912
SH2D1B	-1.92722	0.661921	NA	None	None	0.179194
UHMK1	-0.230428	0.337617	0.424956	None	None	0.471576
UAP1	-0.889162	2.9249e-05	9.59111e-05	None	None	4.53389
AL596325.2	-1.92722	0.661921	NA	None	None	0.179194
DDR2	-2.11796	2.52807e-10	1.83766e-09	extracellular matrix organization	None	9.59721
HSD17B7	5.40815	2.07094e-18	4.44778e-17	None	None	17.6838
RGS5	0.318584	0.558822	0.648505	None	None	0.252727
AL499616.1	7.82424	4.68626e-07	2.03096e-06	None	None	6.32917
AL592435.1	4.58889	0.0227869	0.0421087	None	None	1.64231
NUF2	6.89787	2.79391e-20	7.27356e-19	None	None	19.5538
PBX1	-1.12484	0.00276261	0.00635223	None	None	2.55868
AL391001.1	-2.36153	0.585772	NA	None	None	0.232271
AL357568.2	2.9641	NA	NA	None	None	NA
LRRC52-AS1	-1.76786	0.68625	NA	None	None	0.163518
LRRC52	0	1	NA	None	None	0
AL356441.1	7.33858	0.000288661	0.000801355	None	None	3.53961
MGST3	1.71002	3.12491e-48	5.56511e-46	None	None	47.5052
ALDH9A1	1.47292	9.31352e-09	5.27959e-08	None	None	8.03089
TMCO1	-0.0321088	0.894279	0.945341	None	None	0.0485271
TMCO1-AS1	1.92963	0.273686	0.355448	None	None	0.562747
UCK2	-2.30288	3.9536e-06	1.48133e-05	None	None	5.40301
AL358115.1	7.90368	9.84203e-09	5.55415e-08	None	None	8.00692
FAM78B	NA	NA	NA	None	None	NA
AL596087.2	NA	NA	NA	None	None	NA
POGK	-0.419186	0.0172236	0.0328411	None	None	1.76388
TADA1	-0.581886	0.0463051	0.0789498	None	None	1.33437
ILDR2	-4.34802	1.18128e-08	6.56327e-08	None	None	7.92765
MAEL	-13.1894	2.35587e-25	9.35099e-24	None	None	24.6278
GPA33	6.70663	1.01586e-07	4.85712e-07	None	None	6.99317
DUSP27	6.44163	9.76274e-05	0.000294022	None	None	4.01043
LINC01363	-2.01597	0.574661	NA	None	None	0.240588
AL451050.2	-0.341503	0.261467	0.34292	None	None	0.582583
POU2F1	-1.90393	3.82911e-27	1.77961e-25	None	None	26.4169
AL136984.1	-6.54584	0.0046958	0.0102558	None	None	2.32829
CD247	-1.06613	0.267144	0.348797	immune response-regulating cell surface receptor signaling pathway	None	0.573254
CREG1	1.42152	0.000409033	0.00110222	None	None	3.38824
RCSD1	-2.69335	0.000528472	0.00139493	None	None	3.27698
MPZL1	3.24482	3.39581e-27	1.58188e-25	None	None	26.4691
ADCY10	3.10707	2.626e-15	3.9174e-14	None	intrinsic apoptotic signaling pathway in response to DNA damage	14.5807
MPC2	1.76431	7.38048e-11	5.82222e-10	None	None	10.1319
DCAF6	0.714098	0.0223904	0.0414483	None	None	1.64994
GPR161	0.311603	0.805838	0.869854	None	None	0.093752
TIPRL	-0.740464	9.9178e-05	0.000298424	None	None	4.00358
SFT2D2	0.0616677	0.707809	0.784791	None	None	0.150084
TBX19	-1.48591	3.67765e-06	1.38697e-05	None	None	5.43443
AL023755.1	11.0979	1.72915e-16	3.03378e-15	None	None	15.7622
XCL2	NA	NA	NA	None	None	NA
XCL1	5.2834	0.0161239	0.0309827	None	None	1.79253
DPT	-0.00364205	0.999341	NA	None	None	0.000286434
LINC00970	-0.478709	0.740261	0.813112	None	None	0.130615
ATP1B1	5.08613	3.66368e-16	6.12867e-15	None	None	15.4361
NME7	1.87407	0.0157967	0.0304145	None	None	1.80143
BLZF1	-0.772775	3.18942e-05	0.000103891	None	None	4.49629
CCDC181	-0.605371	0.185275	0.258472	None	None	0.732184
SLC19A2	-0.200296	0.38468	0.474403	None	None	0.4149
Z99572.1	-0.906439	0.586865	0.675247	None	None	0.231462
F5	-2.96704	6.32684e-05	0.000196666	None	None	4.19881
SELP	2.25674	0.322744	0.409309	None	None	0.491141
C1orf112	0.0636482	0.777973	0.846037	None	None	0.109036
SELL	-6.51044	0.0958197	0.148375	None	None	1.01855
SELE	NA	NA	NA	None	None	NA
METTL18	2.62255	0.0666823	0.108079	None	ribosome biogenesis	1.17599
SCYL3	-0.706582	6.61223e-09	3.8204e-08	None	None	8.17965
KIFAP3	-1.02743	0.00331031	0.00747159	None	None	2.48013
LINC01681	-8.48065	0.000485515	0.00129086	None	None	3.3138
GORAB-AS1	-1.0886	0.798004	NA	None	None	0.0979952
GORAB	0.272903	0.342495	0.429967	None	None	0.465346
AL023495.1	-2.98747	0.434625	NA	None	None	0.361885
PRRX1	-4.87653	0.254181	NA	connective tissue development	None	0.594857
Z97200.1	NA	NA	NA	None	None	NA
BX284613.2	-1.59028	0.333239	0.42029	None	None	0.477244
MROH9	8.0935	3.60268e-07	1.59026e-06	None	None	6.44337
FMO1	7.04441	3.957e-06	1.48233e-05	None	None	5.40263
FMO4	-0.371388	0.486049	0.578327	None	None	0.31332
PRRC2C	-0.367213	0.0286524	0.0516928	None	None	1.54284
MYOCOS	0.351772	0.782919	0.850451	None	None	0.106283
VAMP4	-0.651422	0.0186212	0.0351796	None	None	1.72999
EEF1AKNMT	1.50453	NA	NA	None	None	NA
DNM3	-1.20758	0.0133956	0.026269	None	None	1.87304
DNM3OS	-5.20093	0.00212253	0.00500045	None	None	2.67315
PIGC	-1.33274	4.66007e-05	0.000148104	None	None	4.33161
C1orf105	7.11928	0.00128168	0.0031562	None	None	2.89222
SUCO	-0.343375	0.170343	0.240628	None	None	0.768676
FASLG	NA	NA	NA	None	None	NA
AL031599.1	-0.965175	0.244459	0.325224	None	None	0.611794
Z97198.1	NA	NA	NA	None	None	NA
TNFSF4	0.799567	0.800809	NA	None	None	0.0964709
AL645568.1	3.03745	2.72512e-42	3.36443e-40	None	None	41.5646
PRDX6	0.847854	8.20779e-07	3.43754e-06	None	None	6.08577
SLC9C2	4.9678	0.0100996	0.020447	None	None	1.9957
AL139142.1	0.760902	0.862079	NA	None	None	0.0644531
ANKRD45	3.6246	0.296835	NA	None	None	0.527484
KLHL20	-0.973261	0.00187254	0.0044611	None	None	2.72757
CENPL	1.4546	3.90838e-06	1.46603e-05	None	None	5.408
DARS2	0.62293	0.0145537	0.0282865	None	None	1.83703
GAS5	3.32458	0.0770412	0.122715	None	None	1.11328
GAS5-AS1	6.36464	0.00439107	0.00965009	None	None	2.35743
ZBTB37	-0.856298	0.00552584	0.0118768	None	None	2.2576
SERPINC1	NA	NA	NA	None	None	NA
RC3H1	0.0794538	0.467086	0.559754	None	None	0.330603
RC3H1-IT1	-0.139864	0.952376	0.993096	None	None	0.0211913
RABGAP1L-DT	-1.92722	0.661921	NA	None	None	0.179194
RABGAP1L	-0.88066	6.3734e-08	3.14667e-07	None	None	7.19563
GPR52	-2.74174	0.530902	NA	None	None	0.274985
RABGAP1L-IT1	4.86776	0.252616	0.333835	None	None	0.59754
Z99127.1	1.05672	0.199742	0.275398	None	None	0.699531
Z99127.4	0.919793	0.00101924	0.00255623	None	None	2.99172
CACYBP	1.82054	5.22154e-11	4.2251e-10	None	None	10.2822
MRPS14	0.867742	1.67413e-06	6.68057e-06	None	None	5.77621
TNN	3.30553	0.437672	NA	None	None	0.358851
KIAA0040	-0.283339	0.202438	0.278409	None	None	0.693709
Z94057.1	1.00379	0.644589	0.72838	None	None	0.190717
TNR	3.30485	0.014634	0.0284288	None	None	1.83464
LINC02803	0.202542	0.889116	0.941071	None	None	0.0510414
COP1	-0.961753	1.78867e-15	2.73728e-14	None	None	14.7475
AL591043.2	-0.0321765	0.980805	1	None	None	0.00841723
PAPPA2	-2.70772	6.08785e-07	2.59559e-06	None	None	6.21554
AL031290.1	2.97052	0.487267	NA	None	None	0.312233
ASTN1	1.31897	0.510047	0.601335	None	None	0.29239
BRINP2	1.17264	0.656172	0.739311	None	None	0.182982
LINC01645	-4.37565	0.179459	NA	None	None	0.746034
AL136114.1	-0.261658	0.905072	0.954595	None	None	0.0433169
SEC16B	0.581704	0.737737	0.810914	None	None	0.132098
RASAL2-AS1	-1.28782	0.151567	0.21824	None	None	0.819396
RASAL2	-1.60247	3.85455e-10	2.7122e-09	connective tissue development	None	9.41403
TEX35	0	1	NA	None	None	0
C1orf220	-0.00364205	0.999341	NA	None	None	0.000286434
RALGPS2	1.66606	1.08205e-10	8.36141e-10	None	None	9.96575
ANGPTL1	6.15985	4.7272e-18	9.8275e-17	None	None	17.3254
FAM20B	-0.26457	0.272301	0.353923	None	None	0.564951
TOR3A	2.58676	4.00733e-05	0.000128598	None	None	4.39714
ABL2	-0.213191	0.246172	0.327167	None	None	0.608762
SOAT1	0.382167	0.153043	0.220021	None	None	0.815185
AXDND1	3.31459	0.0160376	0.0308459	None	None	1.79486
TDRD5	0.899924	0.547933	0.63815	None	None	0.261273
FAM163A	4.51819	8.56952e-08	4.13655e-07	None	None	7.06704
LINC02818	-0.272038	0.871507	0.926251	None	None	0.0597291
TOR1AIP2	-0.374561	0.059944	0.0987244	None	None	1.22225
AL353708.3	6.83928	1.86982e-10	1.39063e-09	None	None	9.7282
TOR1AIP1	-1.0438	3.94811e-06	1.47955e-05	None	None	5.40361
AL353708.1	NA	NA	NA	None	None	NA
CEP350	-1.1239	1.10174e-10	8.50457e-10	None	None	9.95792
QSOX1	0.826186	0.0885667	0.138583	None	None	1.05273
LHX4	6.27549	1.53735e-14	2.04075e-13	None	None	13.8132
ACBD6	-0.798935	0.00455027	0.00997273	None	None	2.34196
XPR1	0.243449	0.125758	0.18629	None	None	0.900465
KIAA1614	2.34073	0.00202153	0.0047849	None	None	2.69432
AL162431.1	0.624776	0.632347	0.71781	None	None	0.199045
KIAA1614-AS1	5.897	0.126234	0.18683	None	None	0.898825
STX6	1.18209	3.58572e-08	1.83985e-07	None	None	7.44542
MR1	3.70259	3.43613e-10	2.4331e-09	None	None	9.46393
IER5	2.88685	6.4045e-21	1.74403e-19	None	None	20.1935
LINC01732	4.59654	0.00211969	0.00499435	None	None	2.67373
CACNA1E	-0.116433	0.931133	0.975413	None	None	0.0309883
AL161734.2	NA	NA	NA	None	None	NA
AL355482.2	NA	NA	NA	None	None	NA
LINC01344	-0.578385	0.669389	0.750044	None	None	0.174321
GLUL	-0.755302	0.0837636	0.132146	None	None	1.07694
RGSL1	-1.92722	0.661921	NA	None	None	0.179194
RNASEL	0.678546	0.586701	0.675097	None	None	0.231583
RGS16	9.86429	1.0359e-15	1.63631e-14	None	None	14.9847
NPL	-0.176225	0.776684	0.845001	None	None	0.109756
AL355999.1	6.38524	3.30863e-07	1.46815e-06	None	None	6.48035
DHX9	-0.0590228	0.67493	0.755033	None	None	0.170741
SHCBP1L	9.19107	4.78183e-12	4.509e-11	None	None	11.3204
LAMC1	0.0457389	0.918063	0.964683	None	None	0.0371277
LAMC2	3.38283	0.000155518	0.00045272	None	None	3.80822
NMNAT2	-2.73927	3.31098e-06	1.26003e-05	None	None	5.48004
AL354953.1	3.74186	0.380211	NA	None	None	0.419975
SMG7-AS1	6.5914	3.25787e-06	1.24169e-05	None	None	5.48707
SMG7	-1.32743	1.22206e-09	7.97429e-09	None	None	8.91291
NCF2	-2.03558	0.0877427	0.137507	None	None	1.05679
AL137800.1	NA	NA	NA	None	None	NA
ARPC5	-1.04659	0.00616571	0.0130964	None	None	2.21002
RGL1	-2.13214	0.000416853	0.00112149	None	None	3.38002
COLGALT2	0.950996	0.750323	NA	None	None	0.124752
TSEN15	-0.764725	0.00636665	0.013471	None	None	2.19609
AL158011.1	7.28426	3.45101e-05	0.000111887	None	None	4.46205
AL445228.2	6.72706	0.000861154	0.00218701	None	None	3.06492
C1orf21	2.57732	3.94272e-38	4.04091e-36	None	None	37.4042
AL078645.1	1.07868	0.804329	NA	None	None	0.094566
AL713852.1	7.55003	2.67694e-05	8.84141e-05	None	None	4.57236
EDEM3	-0.528918	0.0028916	0.00661557	None	None	2.53886
NIBAN1	0.0647468	0.961664	1	None	None	0.0169766
LINC01633	3.09427	0.469063	0.561569	None	None	0.328769
RNF2	-0.444113	0.00470524	0.0102721	None	None	2.32742
TRMT1L	-1.05115	2.83034e-05	9.30984e-05	None	None	4.54816
SWT1	-2.12637	2.18276e-57	6.36608e-55	None	None	56.661
IVNS1ABP	-0.432072	0.116387	0.17475	None	None	0.934095
AL078644.2	5.25247	0.216844	0.29471	None	None	0.663852
LINC01350	-4.03649	0.347865	NA	None	None	0.458589
AL133383.1	-7.52759	0.0766571	0.12219	None	None	1.11545
HMCN1	-8.46716	1.69474e-11	1.47521e-10	extracellular matrix organization	None	10.7709
PRG4	6.35095	0.00320998	0.00726974	None	None	2.4935
TPR	-0.658792	5.29552e-06	1.94821e-05	None	None	5.27609
ODR4	0.104585	0.479833	0.572082	None	None	0.318909
AL096803.2	-0.462668	0.729787	0.803844	None	None	0.136804
PLA2G4A	1.72247	0.422971	0.514499	None	None	0.37369
ERVMER61-1	0.628835	0.259838	0.341207	None	None	0.585297
AL136372.2	-5.02536	0.136648	0.199963	None	None	0.864398
LINC01701	NA	NA	NA	None	None	NA
BRINP3	-4.63954	0.0599179	0.0986976	None	None	1.22244
AL354771.1	-0.00364205	0.999341	NA	None	None	0.000286434
AL138927.1	2.69517	0.468287	0.56084	None	None	0.329488
LINC02770	0.521034	0.868331	0.923442	None	None	0.0613146
RGS18	-1.92722	0.661921	NA	None	None	0.179194
AL390957.1	-0.515456	0.204619	0.281017	None	None	0.689055
RGS1	-1.92722	0.661921	NA	None	None	0.179194
RGS2	3.40411	8.91966e-06	3.17529e-05	None	None	5.04965
UCHL5	-0.103098	0.606827	0.694208	None	None	0.216935
RO60	-0.121147	NA	NA	None	None	NA
GLRX2	1.18035	4.43949e-06	1.64926e-05	None	None	5.35267
CDC73	-0.77387	4.13012e-05	0.000132348	None	None	4.38404
LINC01031	-1.14662	0.0115994	0.0231297	None	None	1.93557
AL138778.1	-3.90752	0.0667088	0.108114	None	None	1.17582
AL136456.1	-1.13058	0.411308	0.50256	None	None	0.385833
AL353072.2	2.71568	0.271679	0.353411	None	None	0.565943
AL353709.1	NA	NA	NA	None	None	NA
KCNT2	-5.08623	0.0209143	0.0389775	None	None	1.67956
CFH	-0.697996	0.864844	0.920512	None	None	0.0630623
ASPM	1.3643	0.000826044	0.00210608	None	None	3.083
ZBTB41	-0.958446	0.000149931	0.000437722	None	None	3.82411
CRB1	-0.352465	0.742478	0.815147	None	None	0.129316
DENND1B	-1.58501	4.96776e-06	1.83467e-05	immune response-regulating cell surface receptor signaling pathway	None	5.30384
C1orf53	5.40962	0.0393767	0.0683925	None	None	1.40476
NEK7	-2.77272	9.18485e-33	6.26563e-31	None	None	32.0369
AL450352.1	-0.00364205	0.999341	NA	None	None	0.000286434
PTPRC	-2.31375	0.0348042	0.0613256	immune response-regulating cell surface receptor signaling pathway	None	1.45837
AL157402.2	NA	NA	NA	None	None	NA
MIR181A1HG	0.816486	0.0638693	0.104183	None	None	1.19471
LINC01222	0	1	NA	None	None	0
AC105941.1	-2.74174	0.530902	NA	None	None	0.274985
LINC02789	2.33814	0.518572	NA	None	None	0.285191
NR5A2	2.71906	1.39622e-05	4.81534e-05	None	None	4.85505
LINC00862	-0.0746947	0.827298	0.888159	None	None	0.082338
AC104461.1	6.18785	3.86222e-17	7.28429e-16	None	None	16.4132
ZNF281	0.499337	0.124542	0.184857	None	None	0.904683
AL359834.1	-4.53366	0.155776	NA	None	None	0.8075
KIF14	1.27606	0.000690578	0.00178444	None	None	3.16079
DDX59	-1.73235	3.77454e-24	1.36127e-22	None	None	23.4231
DDX59-AS1	-1.81934	7.85682e-11	6.18345e-10	None	None	10.1048
CAMSAP2	-1.03516	5.13963e-08	2.57866e-07	None	None	7.28907
INAVA	7.94573	5.06809e-10	3.50121e-09	None	None	9.29516
KIF21B	-2.72965	0.532815	NA	None	None	0.273423
TMEM9	8.79906	1.69484e-11	1.47521e-10	None	None	10.7709
PKP1	-10.8853	2.27101e-13	2.56896e-12	None	None	12.6438
TNNT2	-0.461395	0.672734	0.753121	None	None	0.172156
LAD1	-1.38333	2.43255e-05	8.10207e-05	None	None	4.61394
AC119427.1	-1.92722	0.661921	NA	None	None	0.179194
TNNI1	-0.00364205	0.999341	NA	None	None	0.000286434
PHLDA3	1.69705	3.59648e-08	1.84396e-07	None	intrinsic apoptotic signaling pathway in response to DNA damage	7.44412
CSRP1	-1.49306	2.07965e-05	6.98564e-05	None	None	4.68201
AC096677.1	-3.04213	3.92406e-16	6.54791e-15	None	None	15.4063
NAV1	-3.31033	2.83199e-14	3.62077e-13	None	None	13.5479
IPO9-AS1	1.1515	0.00181005	0.00432914	None	None	2.74231
IPO9	-0.262713	0.124715	0.185031	None	None	0.904083
SHISA4	4.22697	0.321001	NA	None	None	0.493494
AL513217.1	-0.00364205	0.999341	NA	None	None	0.000286434
LMOD1	-1.60755	0.137906	0.201468	None	None	0.860417
TIMM17A	0.764333	0.00120724	0.00298604	None	None	2.91821
RNPEP	0.661206	2.60953e-05	8.64288e-05	None	None	4.58344
ELF3-AS1	-0.0205659	0.958317	0.998042	None	None	0.0184907
ELF3	3.33715	1.78672e-17	3.48749e-16	None	None	16.7479
AL691482.3	NA	NA	NA	None	None	NA
GPR37L1	5.8423	0.041084	0.0709312	None	None	1.38633
ARL8A	-0.742399	0.000695589	0.00179586	None	None	3.15765
PTPN7	3.14563	0.341634	NA	None	None	0.466439
LGR6	-1.50996	0.714474	0.790786	None	None	0.146014
UBE2T	4.04254	4.60302e-07	1.99938e-06	None	None	6.33696
PPP1R12B	-0.365563	0.0334723	0.0592329	None	None	1.47531
SYT2	6.02038	1.71219e-25	6.86375e-24	None	None	24.7664
AC104463.2	4.40688	0.137653	0.201171	None	None	0.861215
KDM5B	-0.405789	0.000564626	0.00148259	None	None	3.24824
PCAT6	2.70425	0.00460425	0.0100735	None	None	2.33684
RABIF	1.126	2.79208e-06	1.07701e-05	None	None	5.55407
KLHL12	-1.22949	9.19136e-05	0.000278104	mesenchyme development	None	4.03662
ADIPOR1	0.306764	0.0946629	0.146798	None	None	1.02382
CYB5R1	0.228241	0.356182	0.444377	None	None	0.448328
TMEM183A	0.366053	0.0444819	0.0761769	None	None	1.35182
PPFIA4	0.184785	0.803884	0.868207	None	None	0.0948067
ADORA1	-7.94861	2.98586e-60	9.69153e-58	None	None	59.5249
AC105940.2	-3.795	0.378523	NA	None	None	0.421908
AC105940.1	NA	NA	NA	None	None	NA
MYBPH	-4.02449	0.349349	NA	None	None	0.45674
CHI3L1	0	1	NA	None	None	0
CHIT1	0	1	NA	None	None	0
LINC01353	-1.92722	0.661921	NA	None	None	0.179194
LINC01136	2.73115	0.173706	0.244572	None	None	0.760185
BTG2	-0.950004	0.0353648	0.0621392	None	None	1.45143
FMOD	0	1	NA	None	None	0
PRELP	6.50547	1.36052e-05	4.69785e-05	None	None	4.8663
OPTC	8.99535	7.40095e-08	3.60709e-07	None	None	7.13071
ATP2B4	3.5556	5.93469e-33	4.13252e-31	None	None	32.2266
LAX1	2.66545	NA	NA	None	None	NA
ZC3H11A	-0.0145412	0.991519	1	None	None	0.00369895
ZBED6	1.12228	0.383675	0.473396	None	None	0.416036
SNRPE	2.44203	9.22218e-17	1.67045e-15	None	None	16.0352
AL592146.2	7.50863	3.03712e-06	1.16439e-05	None	None	5.51754
SOX13	-0.177059	0.249964	0.331136	None	None	0.602122
ETNK2	6.94497	2.33158e-07	1.05773e-06	None	None	6.63235
REN	-1.84569	0.0921326	0.143441	None	None	1.03559
KISS1	-1.40466	0.0563994	0.0937734	None	None	1.24873
GOLT1A	1.63385	6.59596e-05	0.000204589	None	None	4.18072
PLEKHA6	-1.13681	1.22424e-06	4.99221e-06	None	None	5.91213
AL592114.3	7.12338	0.011235	0.0224968	None	None	1.94943
LINC00628	1.8412	0.564665	0.654042	None	None	0.248209
AL606489.1	4.17042	4.1969e-13	4.58018e-12	None	None	12.3771
PPP1R15B	-0.495184	0.187151	0.260656	None	None	0.727808
PIK3C2B	-1.13037	0.0154019	0.0297454	None	None	1.81243
MDM4	-0.609315	6.9219e-08	3.3883e-07	None	None	7.15977
AL512306.3	0.6351	0.0630804	0.103164	None	None	1.20011
LRRN2	5.85698	0.000978229	0.00246104	None	None	3.00956
AL512306.2	7.06125	0.00172784	0.0041483	None	None	2.7625
NFASC	-6.60793	3.26864e-07	1.45205e-06	None	None	6.48563
CNTN2	5.80369	0.000809501	0.00206718	None	None	3.09178
TMEM81	5.08754	0.230312	0.309957	None	None	0.637684
RBBP5	0.676724	0.00924244	0.0188523	None	None	2.03421
DSTYK	0.25785	0.203375	0.279519	None	None	0.691702
TMCC2	0.538029	0.734992	0.80856	None	None	0.133717
NUAK2	6.35122	9.85549e-11	7.65169e-10	None	None	10.0063
LEMD1	-1.29147	0.297324	0.3818	None	None	0.526769
BLACAT1	-1.01943	0.0426631	0.0734118	None	None	1.36995
CDK18	1.17492	0.0799659	0.126878	None	None	1.0971
MFSD4A	5.16956	0.00176693	0.00423458	None	None	2.75278
ELK4	0.271749	0.202314	0.278336	None	None	0.693973
SLC45A3	-1.92722	0.661921	NA	None	None	0.179194
NUCKS1	-0.133207	0.464714	0.557291	None	None	0.332814
RAB29	2.42522	0.00349083	0.00784152	None	None	2.45707
SLC41A1	4.65031	1.13145e-12	1.16766e-11	None	None	11.9464
AC119673.2	-6.43821	0.00037965	0.00102966	None	None	3.42062
PM20D1	-0.965429	0.826616	NA	None	None	0.0826964
RAB7B	2.40501	0.00067704	0.00175328	None	None	3.16939
RHEX	1.25922	0.288542	0.37179	None	None	0.539792
AC244035.1	NA	NA	NA	None	None	NA
FAM72A	3.31431	0.240241	0.320576	None	None	0.619353
SRGAP2	-0.805894	3.07583e-05	0.000100484	None	None	4.51204
IKBKE	1.25472	0.268599	0.350275	None	intrinsic apoptotic signaling pathway in response to DNA damage	0.570895
AC244034.2	NA	NA	NA	None	None	NA
RASSF5	1.61406	0.0629386	0.102957	None	None	1.20108
EIF2D	0.195619	0.330447	0.417499	None	None	0.480898
DYRK3	-4.18028	0.330402	0.417484	None	None	0.480957
MAPKAPK2	-0.119733	0.501436	0.593129	None	None	0.299784
IL10	NA	NA	NA	None	None	NA
IL19	3.32865	0.435642	NA	None	intrinsic apoptotic signaling pathway in response to DNA damage	0.36087
FCMR	-6.20651	0.145035	0.210341	None	None	0.838526
C1orf116	5.40442	0.178821	0.250755	None	None	0.74758
PFKFB2	4.60532	2.88507e-15	4.27849e-14	None	None	14.5398
YOD1	2.37744	1.05919e-14	1.44608e-13	None	None	13.975
C4BPB	2.4729	0.161266	0.22987	None	None	0.792458
C4BPA	NA	NA	NA	None	None	NA
CD55	0.925111	0.00275197	0.00632929	None	None	2.56036
CR2	-3.40695	0.431224	NA	immune response-regulating cell surface receptor signaling pathway	None	0.365297
CR1	-9.65119	4.49655e-07	1.95651e-06	immune response-regulating cell surface receptor signaling pathway	None	6.34712
CR1L	-0.580406	0.120123	0.179488	None	None	0.920375
CD46	0.301738	0.135207	0.198115	None	None	0.869
MIR29B2CHG	0.534816	0.0652644	0.106097	None	None	1.18532
CD34	-9.53724	5.29201e-11	4.27353e-10	connective tissue development	None	10.2764
LINC02767	NA	NA	NA	None	None	NA
PLXNA2	-1.58121	0.000734823	0.001891	None	None	3.13382
AC092810.3	NA	NA	NA	None	None	NA
MIR205HG	2.62326	0.107847	0.163936	None	None	0.967193
AL023754.1	-2.74174	0.530902	NA	None	None	0.274985
LAMB3	1.15449	0.338265	0.425666	None	None	0.470743
HSD11B1-AS1	-2.60244	0.0756844	0.120812	None	None	1.12099
G0S2	-0.00364205	0.999341	NA	None	None	0.000286434
HSD11B1	5.10364	0.00513551	0.0111174	None	None	2.28942
TRAF3IP3	0.603382	0.372421	0.461405	None	None	0.428966
C1orf74	3.16171	0.0338987	0.059898	None	None	1.46982
IRF6	0.62776	0.000752025	0.00193156	None	None	3.12377
UTP25	1.26169	0.00028096	0.000781268	None	ribosome biogenesis	3.55136
SYT14	1.71783	0.56734	NA	None	None	0.246157
SERTAD4-AS1	-1.07571	0.407761	0.498711	None	None	0.389594
SERTAD4	-1.13635	0.00234363	0.00547899	None	None	2.63011
HHAT	-1.58184	0.000231619	0.000654191	None	None	3.63523
KCNH1	0.836892	0.471498	0.563948	None	None	0.32652
AC092017.4	-2.72965	0.532815	NA	None	None	0.273423
[truncated: 28,954 more rows]

## Sheet: STBinvsfirst
gene name	log2FoldChange	pvalue	padj	Gotermfirst	GotermSTBin	pvalue_transformed
AL627309.1	-9.43523	0.0263452	0.0542469	None	None	1.5793
AL627309.5	0.323674	NA	NA	None	None	NA
AP006222.2	2.27886	0.570794	NA	None	None	0.24352
AL732372.1	-6.78606	NA	NA	None	None	NA
AC114498.1	-4.63044	0.000681606	0.00232111	None	None	3.16647
LINC01409	1.94525	0.225486	0.312549	None	None	0.646881
LINC01128	0.702215	0.662919	0.738813	None	None	0.178539
LINC00115	0.795727	0.371295	0.464068	None	None	0.430281
FAM41C	-5.40586	0.204761	0.289968	None	None	0.688753
AL645608.6	NA	NA	NA	None	None	NA
NOC2L	1.45528	2.61957e-05	0.000126966	None	None	4.58177
KLHL17	-0.243287	0.871463	0.912482	None	None	0.0597512
PLEKHN1	1.08443	0.0370877	0.0723799	None	None	1.43077
AL645608.7	-9.42774	0.0264651	0.0544665	None	None	1.57733
HES4	1.16153	0.0348722	0.0687399	None	None	1.45752
ISG15	1.65552	0.0304288	0.061337	None	None	1.51672
AGRN	1.78313	0.107261	0.173937	None	None	0.969557
RNF223	2.36127	0.0706337	0.123377	None	None	1.15099
C1orf159	0.174189	0.553552	0.639877	None	None	0.256842
AL390719.3	9.49348	2.82649e-14	8.22358e-13	None	None	13.5488
TTLL10-AS1	NA	NA	NA	None	None	NA
TTLL10	NA	NA	NA	None	None	NA
TNFRSF18	NA	NA	NA	None	None	NA
TNFRSF4	NA	NA	NA	None	None	NA
SDF4	0.757791	0.000192462	0.00075659	None	None	3.71565
B3GALT6	7.3612	8.51311e-06	4.60629e-05	None	None	5.06991
C1QTNF12	0.45147	0.776286	0.835155	None	None	0.109978
AL162741.1	NA	NA	NA	None	None	NA
UBE2J2	-0.308323	0.189308	0.272944	None	None	0.722832
LINC01786	0	1	NA	None	None	0
SCNN1D	2.67267	0.434124	0.527302	None	None	0.362386
ACAP3	-1.12451	8.15327e-05	0.000353862	None	None	4.08867
PUSL1	0.173667	0.624045	0.704444	None	None	0.204784
INTS11	-1.25157	4.93673e-05	0.00022553	None	None	4.30656
AL139287.1	NA	NA	NA	None	None	NA
CPTP	2.67483	0.0753079	0.130053	None	None	1.12316
TAS1R3	0.371141	0.93289	NA	None	None	0.0301696
DVL1	-0.751445	0.00608946	0.0155996	None	None	2.21542
MXRA8	0.151571	0.912004	0.943139	None	None	0.040003
AURKAIP1	1.31125	1.82135e-05	9.14625e-05	None	None	4.73961
CCNL2	-0.468463	0.0822202	0.13981	None	None	1.08502
MRPL20-AS1	1.88663	0.237253	0.325312	None	None	0.624789
MRPL20	-0.331037	0.0530188	0.0971304	None	None	1.27557
AL391244.2	-0.390989	0.846988	0.893258	None	None	0.0721227
ANKRD65	0.680147	0.76099	0.821962	None	None	0.118621
TMEM88B	NA	NA	NA	None	None	NA
LINC01770	5.33892	0.0999757	0.164371	None	None	1.00011
VWA1	1.83371	8.60654e-10	9.88768e-09	None	None	9.06517
ATAD3C	1.25309	0.0763528	0.131488	None	None	1.11718
ATAD3B	-1.32635	2.51179e-12	4.82204e-11	None	None	11.6
ATAD3A	-1.17252	1.01263e-07	7.88623e-07	None	None	6.99455
TMEM240	4.5477	0.190043	0.273774	None	None	0.721148
SSU72	0.968465	2.6083e-05	0.000126479	None	None	4.58364
AL645728.1	6.42093	3.71511e-11	5.52148e-10	None	None	10.43
AL691432.2	-0.144893	0.854331	0.89903	None	None	0.0683737
MIB2	0.578334	0.0614673	0.109691	None	None	1.21136
MMP23B	-1.11021	0.549947	0.636568	None	None	0.259679
CDK11B	-0.26893	0.461221	0.552848	None	None	0.336091
FO704657.1	-0.94618	NA	NA	None	None	NA
SLC35E2B	-0.565507	0.11747	0.187592	None	None	0.930075
CDK11A	1.53362	2.45969e-05	0.000119923	None	None	4.60912
SLC35E2A	-1.24994	0.013881	0.0315043	None	None	1.85758
NADK	-0.290047	0.218671	0.305301	None	None	0.660208
GNB1	-0.0360138	0.83719	0.88519	None	None	0.0771761
AL109917.1	0	1	NA	None	None	0
CALML6	NA	NA	NA	None	None	NA
CFAP74	-0.34439	0.562183	0.648363	None	None	0.250122
PRKCZ	-0.867888	0.00227824	0.00667939	None	None	2.6424
AL590822.2	1.3766	0.132247	0.206266	None	None	0.878615
PRKCZ-AS1	6.39194	0.00295411	0.00838755	None	None	2.52957
FAAP20	1.4772	1.49451e-08	1.34258e-07	None	None	7.8255
AL590822.1	2.13133	0.290581	0.380115	None	None	0.536733
SKI	-0.32238	0.102249	0.167467	None	None	0.990339
AL590822.3	0.371122	0.932893	NA	None	None	0.030168
MORN1	0.188344	0.357759	0.450457	None	None	0.446409
RER1	0.500805	0.0106542	0.0251127	None	None	1.97248
PEX10	0.614274	0.00106198	0.00343956	None	None	2.97389
PLCH2	-1.55241	0.724665	NA	None	None	0.139862
PANK4	0.422399	0.0224719	0.0475108	None	None	1.64836
AL139246.5	3.53632	0.0100875	0.023978	None	None	1.99621
TNFRSF14-AS1	0	1	NA	None	None	0
TNFRSF14	2.8247	0.107555	0.174285	None	None	0.968371
PRXL2B	NA	NA	NA	None	None	NA
TTC34	3.92997	0.35698	NA	None	None	0.447357
PRDM16-DT	NA	NA	NA	None	None	NA
PRDM16	1.88482	0.663095	NA	None	None	0.178424
ARHGEF16	-1.50289	0.00349939	0.00967311	None	None	2.45601
MEGF6	-0.139372	0.922132	0.950273	None	None	0.0352068
AL513320.1	1.21595	0.780951	NA	None	None	0.107376
TPRG1L	0.759888	0.0217773	0.0462249	None	None	1.662
WRAP73	0.930193	0.0101118	0.0240328	None	None	1.99517
TP73	5.80126	0.000727548	0.00246007	None	intrinsic apoptotic signaling pathway in response to DNA damage	3.13814
CCDC27	NA	NA	NA	None	None	NA
LRRC47	0.202509	0.173963	0.255925	None	None	0.759543
CEP104	-0.32293	0.334082	0.425614	None	None	0.476148
DFFB	-0.128776	0.8238	0.874309	None	None	0.084178
C1orf174	-0.225628	0.393942	0.487083	None	None	0.404568
LINC01134	-0.154275	0.916637	0.946349	None	None	0.0378028
LINC02780	NA	NA	NA	None	None	NA
AJAP1	-7.63487	0.0724546	0.125949	cell-substrate adhesion_x000D_	None	1.13993
NPHP4	-0.731059	0.516694	0.605563	None	None	0.286767
KCNAB2	-0.776351	0.707007	0.776128	None	None	0.150576
CHD5	-0.255774	0.946858	NA	None	None	0.0237151
RPL22	1.72625	5.87536e-06	3.28787e-05	None	cytoplasmic translation	5.23097
RNF207	-1.08971	0.00184665	0.00557024	None	None	2.73362
ICMT	0.551004	0.0114975	0.0268206	None	None	1.9394
LINC00337	6.16357	1.23705e-10	1.66331e-09	None	None	9.90761
GPR153	-0.576928	0.705575	0.774989	None	None	0.151457
ACOT7	0.867879	0.0101439	0.0241009	None	None	1.99379
AL031848.2	5.64526	0.00559484	0.0144857	None	None	2.25221
HES2	-0.562657	0.0470498	0.0879952	None	None	1.32744
ESPN	0.0875474	0.907876	0.940239	None	None	0.0419732
TNFRSF25	0.865276	0.0456452	0.0858201	None	None	1.3406
PLEKHG5	-0.0214505	0.950552	0.971389	None	None	0.0220243
NOL9	-0.549629	0.00247613	0.00720013	None	None	2.60623
TAS1R1	3.55586	0.297165	0.386909	None	None	0.527002
ZBTB48	0.813893	0.000897382	0.00296522	None	None	3.04702
KLHL21	-0.326525	0.240847	0.328993	None	None	0.618258
PHF13	-0.68034	0.0522793	0.0959548	None	None	1.28167
THAP3	-0.346098	0.193413	0.277594	None	None	0.713514
DNAJC11	-0.329671	0.0400076	0.0770202	None	None	1.39786
CAMTA1-DT	7.7657	7.7779e-10	9.00602e-09	None	None	9.10914
CAMTA1	0.329457	0.266768	0.355873	None	None	0.573867
VAMP3	0.482117	0.00841455	0.0205491	None	None	2.07497
Z98884.2	NA	NA	NA	None	None	NA
PER3	0.477139	0.526263	0.614575	None	None	0.278798
Z98884.1	-1.53803	0.700413	NA	None	None	0.154646
TNFRSF9	1.33848	0.758987	NA	None	None	0.119765
PARK7	0.801285	3.46719e-05	0.000163635	None	None	4.46002
AL034417.4	2.54804	0.00150851	0.00467995	None	None	2.82145
AL034417.3	-0.654729	0.432137	0.52554	None	None	0.364378
ERRFI1	0.176627	0.723261	0.790201	None	None	0.140705
AL034417.2	1.87348	0.0108043	0.0254062	None	None	1.9664
LINC01714	2.92963	0.0342526	0.067687	None	None	1.46531
SLC45A1	7.86882	1.96744e-06	1.21521e-05	None	None	5.7061
RERE	-0.153612	0.221545	0.308289	None	None	0.654538
RERE-AS1	9.35497	1.71475e-13	4.17026e-12	None	None	12.7658
ENO1	1.8193	2.25398e-09	2.38591e-08	None	None	8.64705
CA6	NA	NA	NA	None	None	NA
SLC2A7	4.66477	0.273364	0.362949	None	None	0.563259
SLC2A5	-1.47447	0.117469	0.187592	None	None	0.930077
GPR157	-0.947364	0.00010634	0.000447131	None	None	3.9733
MIR34AHG	2.27939	1.85242e-17	9.32301e-16	None	None	16.7323
LNCTAM34A	3.66645	0.00606439	0.0155528	None	None	2.21721
H6PD	0.0448421	0.925524	0.952719	None	None	0.0336123
SPSB1	1.46108	0.00190831	0.0057277	None	None	2.71935
SLC25A33	-0.027527	0.918388	0.947742	None	None	0.0369739
TMEM201	1.43859	0.2741	0.363613	None	None	0.562092
PIK3CD	2.67803	0.00123342	0.00392691	None	None	2.90889
PIK3CD-AS2	5.65577	0.0015156	0.00469825	None	None	2.81941
CLSTN1	-0.252302	0.255773	0.34438	None	None	0.592145
CTNNBIP1	0.24271	0.581164	0.665411	None	None	0.235701
LZIC	1.19069	2.64697e-17	1.30442e-15	None	None	16.5773
NMNAT1	-1.36225	6.96566e-11	9.79424e-10	None	None	10.157
RBP7	1.35821	0.670351	NA	None	None	0.173698
UBE4B	-0.269465	0.173981	0.255934	None	None	0.759497
KIF1B	0.728387	0.00284291	0.00811095	None	None	2.54624
AL139424.3	8.07348	NA	NA	None	None	NA
AL139424.2	5.9029	0.115725	0.18527	None	None	0.936571
PGD	0.659824	0.00141788	0.00444618	None	None	2.84836
CENPS	1.90997	0.279018	0.368641	None	None	0.554368
DFFA	0.311785	0.129845	0.203344	None	None	0.886575
PEX14	-0.169777	0.421123	0.514453	None	None	0.375591
CASZ1	1.42548	0.0940296	0.156257	None	None	1.02674
AL139423.1	NA	NA	NA	None	None	NA
C1orf127	0	1	NA	None	None	0
TARDBP	1.25291	NA	NA	None	None	NA
AL109811.2	0.76066	NA	NA	None	None	NA
SRM	0.288036	0.547006	0.633769	None	None	0.262008
EXOSC10	0.145184	0.503937	0.593788	None	None	0.297624
AL109811.1	2.3542	3.83177e-09	3.88439e-08	None	None	8.4166
EXOSC10-AS1	NA	NA	NA	None	None	NA
MTOR	-1.19045	1.32411e-14	4.07095e-13	None	None	13.8781
ANGPTL7	6.82633	0.0162201	0.0359923	None	None	1.78995
UBIAD1	0.656486	0.00911408	0.0220069	None	None	2.04029
AL031731.1	NA	NA	NA	None	None	NA
FBXO44	6.82709	0.0066004	0.0167152	None	carbohydrate derivative catabolic process	2.18043
FBXO6	7.08515	NA	NA	None	carbohydrate derivative catabolic process	NA
MAD2L2	-1.11861	0.574377	0.659288	None	None	0.240803
DRAXIN	4.55944	0.284442	0.3737	None	None	0.546006
AGTRAP	1.75348	0.0090889	0.0219641	None	None	2.04149
C1orf167	1.71523	0.692437	NA	None	None	0.15962
MTHFR	0.485667	0.00361909	0.00996388	None	None	2.4414
CLCN6	0.809765	5.70512e-06	3.20654e-05	None	None	5.24374
NPPA	9.07934	3.47214e-11	5.22063e-10	None	None	10.4594
AL021155.5	7.33519	2.27285e-08	1.97713e-07	None	None	7.64343
KIAA2013	1.13742	1.35955e-07	1.02961e-06	None	None	6.86661
PLOD1	0.159524	0.583107	0.667166	None	None	0.234252
AL096840.2	5.70598	0.179684	0.262467	None	None	0.74549
MFN2	-0.612108	0.0329773	0.0656269	None	None	1.48179
MIIP	0.833981	0.000336824	0.00124699	None	None	3.4726
TNFRSF8	6.3343	1.45201e-08	1.30897e-07	None	None	7.83803
TNFRSF1B	0.699955	0.0849895	0.143665	None	None	1.07063
VPS13D	-0.628639	6.67612e-06	3.68888e-05	None	None	5.17548
DHRS3	-3.16644	1.77226e-08	1.57443e-07	None	None	7.75147
AC254633.1	NA	NA	NA	None	None	NA
AADACL4	NA	NA	NA	None	None	NA
AADACL3	-2.167	0.616217	NA	None	None	0.210266
C1orf158	-3.12878	0.469266	NA	None	None	0.328581
HNRNPCL3	NA	NA	NA	None	None	NA
LRRC38	0	1	NA	None	None	0
PDPN	-3.09914	0.167287	0.248675	cell-substrate adhesion_x000D_	None	0.776538
PRDM2	0.576336	3.88466e-05	0.00018141	None	None	4.41065
KAZN	0.828283	0.00200868	0.00599686	None	None	2.69709
AL357873.1	11.8324	2.96474e-19	1.90846e-17	None	None	18.528
KAZN-AS1	10.8373	1.26726e-15	4.72549e-14	None	None	14.8971
TMEM51-AS1	6.2549	0.000420936	0.00151847	None	None	3.37578
TMEM51	0.833373	0.085357	0.144179	None	None	1.06876
C1orf195	7.84538	1.33058e-07	1.00915e-06	None	None	6.87596
FHAD1	5.82484	7.15482e-06	3.92755e-05	None	None	5.1454
AL031283.2	0	1	NA	None	None	0
AL031283.1	-0.171585	0.964321	NA	None	None	0.0157785
EFHD2	0.498989	0.252561	0.341208	None	None	0.597633
CTRC	4.62454	0.0795228	0.136077	None	None	1.09951
CELA2A	7.12142	NA	NA	None	None	NA
CELA2B	1.70575	0.060975	0.108945	None	None	1.21485
CASP9	0.184023	0.525177	0.613654	None	None	0.279695
DNAJC16	-0.475192	0.00335684	0.00933795	None	None	2.47407
AGMAT	8.55271	2.55039e-11	3.99243e-10	None	None	10.5934
AL121992.1	6.2797	0.0118528	0.0275013	None	None	1.92618
DDI2	-0.432573	0.0178061	0.0390325	None	None	1.74943
PLEKHM2	-1.1452	6.46404e-05	0.00028672	None	None	4.1895
AL450998.3	0.466938	0.492662	0.582803	None	None	0.307451
SLC25A34	-2.04424	1.8322e-08	1.62259e-07	None	None	7.73703
SLC25A34-AS1	-4.81158	0.141668	0.217907	None	None	0.84873
TMEM82	-6.02812	0.156799	0.236519	None	None	0.804656
FBLIM1	-2.2278	5.62462e-10	6.66637e-09	None	None	9.24991
UQCRHL	0.3711	0.926765	0.953521	None	None	0.0330302
AL450998.2	1.50559	3.63715e-07	2.54144e-06	None	None	6.43924
SPEN	-0.353424	0.110473	0.178146	None	None	0.956743
ZBTB17	0.572499	0.0039462	0.0107383	None	None	2.40382
HSPB7	-3.17263	0.0183132	0.0399867	None	None	1.73724
CLCNKA	-5.09238	0.0042138	0.0113613	None	None	2.37533
EPHA2	2.25932	0.00123968	0.00394565	None	intrinsic apoptotic signaling pathway in response to DNA damage	2.90669
AL451042.1	3.38035	0.429148	NA	None	None	0.367393
ARHGEF19	-0.511137	0.901872	0.935761	None	None	0.0448551
AL109627.1	0	1	NA	None	None	0
CPLANE2	3.5977	0.398327	0.49126	None	None	0.39976
FBXO42	0.261738	0.214895	0.301212	None	None	0.667774
SZRD1	0.214453	0.202543	0.287598	None	None	0.693483
SPATA21	3.20422	0.000541736	0.00188979	None	None	3.26621
NECAP2	0.922692	5.55588e-10	6.59768e-09	None	None	9.25525
LINC01772	0.634593	0.507011	0.59659	None	None	0.294983
NBPF1	-0.317737	0.20879	0.294494	None	None	0.68029
CROCC	0.285268	0.529516	0.617605	None	None	0.276121
BX284668.5	-0.0975521	0.964902	0.982794	None	None	0.0155166
BX284668.6	6.55061	0.00934022	0.0224616	None	None	2.02964
MFAP2	-2.294	0.0238705	0.0499443	None	None	1.62214
AL049569.1	3.09948	7.09971e-18	3.82845e-16	None	None	17.1488
ATP13A2	0.599229	0.00305376	0.00862152	None	None	2.51516
SDHB	-0.00032932	0.998377	1	None	None	0.000705304
PADI2	-0.58451	0.518347	0.607175	None	None	0.28538
PADI1	2.55386	5.03696e-06	2.86067e-05	None	None	5.29783
PADI3	5.79314	0.103156	0.168621	None	None	0.986506
PADI4	0	1	NA	None	None	0
RCC2	-0.306822	0.238741	0.326766	None	None	0.622073
ARHGEF10L	-0.204385	0.652645	0.729533	None	None	0.185323
LINC02810	NA	NA	NA	None	None	NA
IGSF21	0	1	NA	None	None	0
PAX7	NA	NA	NA	None	None	NA
ALDH4A1	1.43031	0.354935	0.447393	None	None	0.449852
IFFO2	2.16808	2.19431e-11	3.50936e-10	None	None	10.6587
AL137127.1	0	1	NA	None	None	0
UBR4	-0.182363	0.268002	0.357133	None	None	0.571863
EMC1-AS1	1.93683	NA	NA	None	None	NA
EMC1	1.17511	5.06727e-11	7.3301e-10	None	None	10.2952
MRTO4	0.816066	4.9729e-08	4.0844e-07	None	None	7.30339
AKR7A3	4.74627	0.264397	0.353565	None	None	0.577744
AKR7A2	1.74336	0.0126185	0.0290065	None	None	1.89899
SLC66A1	2.21652	NA	NA	None	None	NA
CAPZB	-0.322776	0.00102003	0.00331885	None	None	2.99139
MICOS10	3.1729	NA	NA	None	None	NA
NBL1	5.88363	0.0036087	0.00994191	None	None	2.44265
TMCO4	-1.71425	1.95337e-05	9.7451e-05	None	None	4.70921
OTUD3	0.690159	0.000842622	0.00279909	None	None	3.07437
PLA2G2A	-9.51556	2.68574e-08	2.31576e-07	None	None	7.57094
PLA2G5	-10.211	1.57704e-12	3.14781e-11	None	None	11.8022
PLA2G2F	-1.1793	0.231618	0.31933	None	None	0.635227
UBXN10	0.371141	0.93289	NA	None	None	0.0301696
VWA5B1	-6.61727	0.0599586	0.107502	None	None	1.22215
LINC01141	-2.24272	0.609075	NA	None	None	0.215329
CAMK2N1	0.857168	0.439561	0.532618	None	None	0.356981
MUL1	1.19133	1.97128e-06	1.21685e-05	None	None	5.70525
CDA	2.46955	0.00058371	0.00201897	None	carbohydrate derivative catabolic process	3.2338
PINK1	0.472646	0.0848126	0.14346	None	None	1.07154
PINK1-AS	1.78664	0.0602002	0.10786	None	None	1.2204
DDOST	1.7014	6.94453e-08	5.564e-07	None	None	7.15836
KIF17	-0.0713331	0.873811	0.914325	None	None	0.0585824
SH2D5	-1.32108	0.00203873	0.00607314	None	None	2.69064
HP1BP3	-0.540377	0.00265907	0.00766179	None	None	2.57527
EIF4G3	0.316108	0.136114	0.211257	None	None	0.866098
ECE1	2.29151	8.70617e-07	5.70778e-06	None	None	6.06017
NBPF3	-1.32778	1.76191e-11	2.86905e-10	None	None	10.754
ALPL	-2.65785	0.00970455	0.0231826	None	None	2.01302
RAP1GAP	-1.96597	9.54658e-24	1.06875e-21	None	None	23.0202
USP48	-0.147639	0.30584	0.396102	None	None	0.514506
LDLRAD2	-5.55429	0.192439	0.276586	None	None	0.715707
HSPG2	-3.26031	1.04075e-19	7.07541e-18	None	None	18.9827
CELA3A	NA	NA	NA	None	None	NA
LINC00339	1.98514	0.164384	0.245355	None	None	0.78414
CDC42	0.319041	0.000775457	0.00259976	None	None	3.11044
CDC42-AS1	8.08634	1.33991e-10	1.78761e-09	None	None	9.87292
CDC42-IT1	1.05719	NA	NA	None	None	NA
WNT4	5.72452	2.04577e-10	2.64703e-09	None	None	9.68914
AL445253.1	7.44198	6.15945e-05	0.000274867	None	None	4.21046
ZBTB40	0.182133	0.445438	0.538094	None	None	0.351213
ZBTB40-IT1	NA	NA	NA	None	None	NA
C1QA	-1.55244	0.522847	0.611487	None	None	0.281625
C1QC	0	1	1	None	None	0
C1QB	0	1	1	None	None	0
EPHB2	-1.74892	0.00713799	0.0178853	None	None	2.14642
KDM1A	0.270223	0.174316	0.256298	None	None	0.758662
AL031428.1	1.38834	9.21085e-06	4.9539e-05	None	None	5.0357
LUZP1	-1.14205	8.66505e-05	0.000372478	None	None	4.06223
LINC01355	-1.33061	3.11189e-13	7.11452e-12	None	None	12.507
AL109936.6	1.67712	0.0191661	0.0414864	None	None	1.71747
HNRNPR	-0.464831	0.00227977	0.00668293	None	None	2.64211
ZNF436	1.04829	0.000317509	0.00118273	None	None	3.49824
ZNF436-AS1	0.5625	0.0454268	0.0855265	None	None	1.34269
TCEA3	-0.562899	0.564936	0.650992	None	None	0.248
ASAP3	-2.15329	3.33374e-07	2.34855e-06	None	None	6.47707
E2F2	0.303789	0.633843	0.713043	None	None	0.198018
ID3	2.44362	4.08612e-06	2.36167e-05	None	None	5.38869
AL450043.1	10.1185	6.91042e-12	1.21561e-10	None	None	11.1605
MDS2	3.80263	2.32661e-05	0.000114082	None	None	4.63328
RPL11	2.7073	1.55503e-06	9.77481e-06	None	cytoplasmic translation	5.80826
ELOA-AS1	1.63873	6.10012e-14	1.6512e-12	None	None	13.2147
ELOA	0.0304408	0.852114	0.897469	None	None	0.0695023
PITHD1	0.780853	0.00172795	0.00525142	None	None	2.76247
LYPLA2	0.0448392	0.853387	0.898396	None	None	0.0688541
GALE	0.574647	0.138455	0.21404	None	None	0.858692
HMGCL	0.52606	0.00707918	0.0177574	None	None	2.15002
FUCA1	-0.507313	0.0820381	0.139558	None	None	1.08598
CNR2	5.18325	NA	NA	None	None	NA
PNRC2	0.872635	8.48253e-08	6.7127e-07	None	None	7.07147
SRSF10	0.509979	0.000142706	0.00058164	None	None	3.84556
AL591178.1	0	1	NA	None	None	0
MYOM3	0.371141	0.93289	NA	None	None	0.0301696
IFNLR1	-0.788382	0.0646352	0.11439	None	None	1.18953
AL138902.1	2.0532	0.192718	0.27692	None	None	0.715077
GRHL3	1.4758	0.0593337	0.106651	None	None	1.2267
STPG1	1.60778	1.3197e-09	1.46547e-08	None	None	8.87952
NIPAL3	1.10497	0.00178951	0.00542009	None	None	2.74727
RCAN3AS	7.48525	1.85564e-17	9.32301e-16	None	None	16.7315
RCAN3	1.27128	9.61042e-11	1.31713e-09	None	None	10.0173
NCMAP-DT	3.63602	0.0313709	0.0629466	None	None	1.50347
NCMAP	-0.926962	0.0303989	0.0612828	None	None	1.51714
SRRM1	0.487576	0.0741915	0.128422	None	None	1.12965
AL445648.1	6.61653	0.000116329	0.000484191	None	None	3.93431
CLIC4	-0.601214	8.02752e-05	0.000349153	None	None	4.09542
RUNX3	1.66599	0.415499	0.50876	None	None	0.38143
AL050344.1	0	1	NA	None	None	0
SYF2	1.47717	9.11201e-15	2.92365e-13	None	None	14.0404
AL031432.4	1.12585	0.486404	0.576824	None	None	0.313003
AL031432.5	1.21595	0.780951	NA	None	None	0.107376
RSRP1	-1.08274	3.55591e-06	2.08447e-05	None	None	5.44905
AL031432.3	0.371141	0.93289	NA	None	None	0.0301696
RHD	1.27495	0.095861	0.158657	None	None	1.01836
TMEM50A	0.303567	0.0593439	0.10666	None	None	1.22662
RHCE	1.14486	0.000967028	0.00317029	None	None	3.01456
MACO1	-0.543996	0.00416999	0.0112623	None	None	2.37987
LDLRAP1	-0.166431	0.383072	0.4759	None	None	0.41672
AL606491.1	-2.49908	0.107877	0.174699	None	None	0.967069
MAN1C1	-1.90968	1.79764e-11	2.92031e-10	None	None	10.7453
AL031280.1	1.38036	0.020031	0.0430664	None	None	1.6983
SELENON	1.43986	0.0231842	0.0487416	None	None	1.63481
AL020996.1	2.38278	0.172269	0.254098	None	None	0.763793
MTFR1L	-1.26785	2.29292e-24	2.81142e-22	None	None	23.6396
AUNIP	-0.269967	0.470104	0.561387	None	None	0.327806
AL033528.2	-0.04774	0.963852	0.981918	None	None	0.0159895
PAQR7	-2.56767	4.98289e-23	5.1066e-21	None	None	22.3025
STMN1	0.0653873	0.89213	0.928412	None	None	0.0495717
PAFAH2	-1.94611	1.82935e-17	9.23597e-16	None	None	16.7377
EXTL1	-0.842392	0.323739	0.414694	None	None	0.489805
SLC30A2	-1.17851	7.49867e-07	4.97472e-06	None	None	6.12502
AL391650.2	0.377909	0.820558	0.871946	None	None	0.0858908
TRIM63	5.21907	0.00129415	0.00409747	None	None	2.88802
PDIK1L	-0.139864	0.639701	0.717947	None	None	0.194023
FAM110D	NA	NA	NA	None	None	NA
ZNF593	1.49559	0.0886986	0.148811	None	None	1.05208
CNKSR1	0.192813	0.382555	0.475372	None	None	0.417306
CATSPER4	-0.7622	0.858919	0.90302	None	None	0.0660479
CEP85	1.66786	1.3722e-10	1.82715e-09	None	None	9.86258
SH3BGRL3	1.28265	0.0017684	0.00536169	None	None	2.75242
UBXN11	0.36984	0.319316	0.410151	None	None	0.49578
CD52	9.13335	1.29119e-13	3.22782e-12	None	None	12.889
CRYBG2	-0.36491	0.224812	0.311824	None	None	0.648181
ZNF683	0	1	NA	None	None	0
LIN28A	NA	NA	NA	None	None	NA
DHDDS	-0.172752	0.265576	0.354797	None	None	0.575811
AL513365.2	0.38765	0.0370083	0.072266	None	None	1.4317
HMGN2	-0.371143	0.0327534	0.0652502	None	None	1.48474
RPS6KA1	-0.767247	0.0699593	0.122334	None	None	1.15515
AL512408.1	0	1	NA	None	None	0
ARID1A	-0.76783	3.50986e-16	1.43452e-14	None	None	15.4547
PIGV	1.56829	1.37876e-05	7.12342e-05	None	None	4.86051
ZDHHC18	-0.623791	0.00260853	0.00754044	None	None	2.5836
SFN	7.74296	3.28475e-20	2.3919e-18	None	intrinsic apoptotic signaling pathway in response to DNA damage	19.4835
GPN2	-0.194375	0.285863	0.375273	None	None	0.543842
GPATCH3	1.30251	1.53278e-05	7.82111e-05	None	None	4.81452
NUDC	0.180804	0.103256	0.168726	None	None	0.986086
KDF1	0.478014	0.0776103	0.133325	None	None	1.11008
TRNP1	6.39406	0.000144979	0.000589501	None	None	3.8387
TENT5B	10.2724	3.9225e-15	1.34891e-13	None	None	14.4064
SLC9A1	0.258387	0.051556	0.0949233	None	None	1.28772
WDTC1	-1.05194	8.30153e-05	0.000358873	None	None	4.08084
TMEM222	0.985591	4.0739e-09	4.10359e-08	None	None	8.38999
SYTL1	2.23239	0.00135338	0.00426143	None	None	2.86858
MAP3K6	1.14955	0.414885	0.508128	None	None	0.382072
FCN3	NA	NA	NA	None	None	NA
WASF2	0.236827	0.0393335	0.0759639	None	None	1.40524
FO393419.2	9.1595	1.83864e-12	3.61395e-11	None	None	11.7355
AHDC1	-0.28571	0.456336	0.548419	None	None	0.340715
FGR	-1.55244	0.724659	0.790838	None	None	0.139866
IFI6	1.9119	0.000539695	0.00188427	None	None	3.26785
AL445490.1	8.14136	3.34321e-10	4.13614e-09	None	None	9.47584
FAM76A	0.436823	0.0496811	0.0921301	None	None	1.30381
STX12	-0.0494623	0.691957	0.76296	None	None	0.159921
AL020997.3	NA	NA	NA	None	None	NA
AL020997.4	7.4295	0.000703668	0.00238795	None	None	3.15263
PPP1R8	-0.170156	0.358785	0.451479	None	None	0.445165
THEMIS2	1.10174	0.529591	0.617622	None	None	0.276059
RPA2	-1.33725	3.01893e-16	1.2563e-14	None	None	15.5201
SMPDL3B	-0.93888	0.462671	0.554102	None	None	0.334728
AL512288.1	5.79819	0.0056996	0.0147125	None	None	2.24416
XKR8	0.443481	0.735402	0.800155	None	None	0.133475
EYA3	-0.326132	0.0157606	0.0351284	None	None	1.80243
PTAFR	0.271792	0.575131	0.65986	None	None	0.240233
DNAJC8	0.561566	9.82488e-08	7.68056e-07	None	None	7.00767
ATP5IF1	1.31151	2.19819e-11	3.51284e-10	None	None	10.6579
AL353622.1	0.00335931	0.996877	1	None	None	0.00135852
SESN2	0.562328	0.00910656	0.0219939	None	None	2.04065
MED18	0.880873	0.000710033	0.00240757	None	None	3.14872
PHACTR4	-0.511703	0.0391314	0.0756942	None	None	1.40747
RCC1	-0.646539	0.0412333	0.0790317	None	None	1.38475
SNHG3	1.81631	0.359299	0.451937	None	None	0.444544
TRNAU1AP	-0.0130922	0.939414	0.962544	None	None	0.027143
SNHG12	0.68588	0.00936828	0.0225204	None	None	2.02834
TAF12	0.110346	0.418843	0.512245	None	None	0.377949
RAB42	1.33849	0.758986	NA	None	None	0.119766
LINC01715	6.13303	0.000143672	0.000584767	None	None	3.84263
AL360012.1	8.05712	0.000361722	0.00132984	None	None	3.44163
GMEB1	-1.18558	4.32988e-10	5.25891e-09	None	None	9.36352
YTHDF2	-0.0311145	0.826292	0.876411	None	None	0.0828666
OPRD1	0.27563	0.881355	0.919897	None	None	0.0548489
EPB41	-1.55133	5.49073e-14	1.50137e-12	None	None	13.2604
TMEM200B	1.13568	0.795401	NA	None	None	0.0994139
AL357500.1	-0.419773	0.826523	0.876611	None	None	0.082745
SRSF4	-0.276077	0.00168847	0.00515018	None	None	2.77251
MECR	-1.05325	2.51594e-07	1.82165e-06	None	None	6.5993
PTPRU	-0.820248	0.0469627	0.0878563	None	None	1.32825
LINC01756	6.34948	0.0949522	0.157532	None	None	1.02249
MATN1-AS1	7.69014	5.16355e-06	2.9253e-05	None	None	5.28705
LAPTM5	-1.55244	0.561622	0.647788	None	None	0.250556
SDC3	-0.889431	0.127192	0.200108	None	None	0.895542
PUM1	-0.383235	0.0064747	0.0164556	None	None	2.18878
NKAIN1	2.2308	NA	NA	None	None	NA
SNRNP40	0.11861	0.441747	0.534576	None	None	0.354826
ZCCHC17	-0.342147	0.0909539	0.152013	None	None	1.04118
AL451070.1	2.01724	8.85921e-07	5.79152e-06	None	None	6.0526
FABP3	8.01671	6.69652e-05	0.00029633	None	None	4.17415
SERINC2	-0.288222	0.500301	0.590449	None	None	0.300769
LINC01226	0.896742	0.574697	0.659582	None	None	0.240561
AC114488.1	5.55056	0.0874006	0.146957	None	None	1.05849
TINAGL1	0.724655	0.0450283	0.0849082	None	None	1.34651
HCRTR1	7.29439	0.00371164	0.0101874	None	None	2.43043
PEF1	-0.355847	0.0380807	0.0740162	None	None	1.4193
AC114488.2	-2.88986	0.425645	NA	None	None	0.370953
AC114488.3	NA	NA	NA	None	None	NA
COL16A1	-2.91986	0.076223	0.131303	cell-substrate adhesion_x000D_	None	1.11791
ADGRB2	-1.26215	0.498978	0.589225	None	None	0.301919
SPOCD1	7.2633	1.7464e-06	1.08913e-05	None	None	5.75786
AL354919.1	0	1	NA	None	None	0
AL136115.2	-0.656921	0.0696534	0.121892	None	None	1.15706
PTP4A2	0.22841	0.251737	0.340303	None	None	0.599053
KHDRBS1	-0.27651	0.00186029	0.00560279	None	None	2.73042
AL445248.1	3.58713	0.000453751	0.00162003	None	None	3.34318
TMEM39B	-0.169667	0.300048	0.390048	None	None	0.522809
KPNA6	-0.586594	2.68466e-05	0.000129785	None	None	4.57111
TXLNA	0.953801	1.61337e-09	1.76213e-08	None	None	8.79227
CCDC28B	5.42609	0.000402558	0.00146145	None	None	3.39517
AL049795.1	-2.2427	0.609078	NA	None	None	0.215327
IQCC	2.24996	0.236646	0.324718	None	None	0.625901
DCDC2B	7.36966	1.28297e-07	9.76644e-07	None	None	6.89178
TMEM234	0.292687	0.198758	0.283624	None	None	0.701676
EIF3I	0.82837	0.000147483	0.000598384	None	None	3.83126
FAM167B	-2.34077	0.592884	NA	None	None	0.227031
LCK	0.371109	0.920183	0.949071	None	None	0.0361257
HDAC1	0.16881	0.152365	0.231135	None	None	0.817114
MARCKSL1	3.30215	0.00951577	0.0228137	None	None	2.02156
TSSK3	0.824927	0.522102	0.610754	None	None	0.282245
FAM229A	0.541729	0.515306	0.604452	None	None	0.287935
BSDC1	-0.23626	0.0442091	0.0836238	None	None	1.35449
ZBTB8B	2.13085	0.281614	0.370977	None	None	0.550346
ZBTB8A	2.21633	NA	NA	None	None	NA
ZBTB8OS	-0.71841	1.10926e-14	3.48851e-13	None	None	13.955
RBBP4	-0.281198	0.0102106	0.0242288	None	None	1.99095
SYNC	2.65667	4.42579e-15	1.5044e-13	None	None	14.354
KIAA1522	1.92719	1.12345e-05	5.92623e-05	None	None	4.94945
YARS	-0.0902454	0.681447	0.754319	None	None	0.166568
S100PBP	-0.650049	0.0103951	0.0245956	None	None	1.98317
FNDC5	5.2122	0.0305666	0.0615796	None	None	1.51475
HPCA	-1.55239	0.724669	NA	None	None	0.139861
TMEM54	-0.130651	0.73899	0.803042	None	None	0.131361
AL031602.2	9.57951	7.88447e-07	5.21053e-06	None	None	6.10323
RNF19B	0.0530967	0.813863	0.866174	None	None	0.0894489
AL020995.1	2.38568	6.89404e-12	1.21376e-10	None	None	11.1615
AK2	-0.301402	0.128817	0.202106	None	None	0.890028
AZIN2	0.599245	0.357673	0.450376	None	None	0.446514
TRIM62	-2.70931	2.26108e-13	5.32907e-12	None	None	12.6457
AL662907.3	-1.84447	0.67101	NA	None	None	0.173271
ZNF362	-0.824435	0.00536475	0.0139637	None	None	2.27045
AL513327.3	0	1	1	None	None	0
A3GALT2	2.74044	0.451657	NA	None	None	0.345191
AL513327.1	3.02185	1.32797e-06	8.42168e-06	None	None	5.87681
PHC2	0.735705	2.14951e-05	0.000106283	None	None	4.66766
AL513327.2	1.99787	1.01507e-08	9.44842e-08	None	None	7.99351
ZSCAN20	1.93198	6.31828e-06	3.51473e-05	None	None	5.1994
CSMD2	-2.01822	0.459646	0.551538	None	None	0.337576
SMIM12	0.385844	0.0231492	0.0486732	None	None	1.63546
GJB5	0.371119	0.932894	NA	None	None	0.0301678
GJB4	4.71381	0.268309	0.35745	None	None	0.571365
GJB3	5.29137	0.213616	0.299971	None	None	0.670366
GJA4	NA	NA	NA	None	None	NA
DLGAP3	0.371141	0.93289	NA	None	None	0.0301696
TMEM35B	7.12058	0.000100385	0.000424431	None	None	3.99833
ZMYM6	2.10951	0.19668	0.281192	None	None	0.70624
ZMYM1	0.367736	0.0186978	0.0406927	None	None	1.72821
AL590434.1	-0.590661	0.886357	NA	None	None	0.0523912
SFPQ	-0.164332	0.2197	0.306384	None	None	0.65817
ZMYM4	-0.692406	6.00685e-05	0.000268931	None	None	4.22135
ZMYM4-AS1	2.30243	6.62415e-09	6.40916e-08	None	None	8.17887
KIAA0319L	-0.634453	0.00448738	0.0119906	None	None	2.34801
NCDN	0.739379	0.329278	0.420613	None	None	0.482437
AC004865.2	4.17997	0.0167898	0.0370649	None	None	1.77495
TFAP2E	2.57578	0.00642674	0.0163538	None	None	2.19201
PSMB2	0.22202	0.16399	0.244891	None	None	0.785182
C1orf216	5.59864	0.0249222	0.0518139	None	None	1.60341
CLSPN	-0.0120536	0.977422	0.992112	None	None	0.0099178
AGO4	-1.03742	0.000114248	0.0004763	None	None	3.94215
AGO1	1.71531	0.0593982	0.106739	None	None	1.22623
AGO3	-0.491357	0.0322311	0.0643342	None	None	1.49172
AL138787.2	1.95639	9.03364e-05	0.000386467	None	None	4.04414
ADPRHL2	1.27195	3.81103e-06	2.21949e-05	None	None	5.41896
COL8A2	5.97171	0.0465986	0.087286	None	None	1.33163
TRAPPC3	-0.041388	0.826816	0.876742	None	None	0.0825912
MAP7D1	0.140208	0.552843	0.639253	None	None	0.257398
THRAP3	-0.0994024	0.534126	0.621714	None	None	0.272356
SH3D21	1.97357	6.99859e-16	2.72522e-14	None	None	15.155
EVA1B	0.451042	0.244585	0.332709	None	None	0.611569
AL591845.1	-1.40623	0.251017	0.33944	None	None	0.600297
STK40	0.13574	0.579265	0.663568	None	None	0.237123
LSM10	0.283467	0.409362	0.502499	None	None	0.387893
OSCP1	0.908966	0.000190707	0.000750979	None	None	3.71963
MRPS15	0.836791	0.00307687	0.00867274	None	None	2.51189
CSF3R	-1.97647	3.79769e-09	3.85173e-08	None	None	8.42048
GRIK3	0	1	NA	None	None	0
AL353604.1	-3.21632	0.456459	NA	None	None	0.340598
LINC01137	-0.453484	0.346378	0.43862	None	None	0.46045
ZC3H12A	1.93533	0.0340755	0.0674033	None	None	1.46756
MEAF6	-0.188768	0.465869	0.557187	None	None	0.331736
SNIP1	1.07765	9.59191e-08	7.52127e-07	None	None	7.01809
DNALI1	6.70126	0.00632078	0.0161201	None	None	2.19923
GNL2	0.499829	0.0414401	0.0793626	None	None	1.38258
RSPO1	0	1	NA	None	None	0
C1orf109	0.713273	0.000463066	0.00164744	None	None	3.33436
CDCA8	-0.323719	0.585614	0.669263	None	None	0.232388
EPHA10	4.15303	0.330031	NA	None	None	0.481445
MANEAL	5.76923	0.00219364	0.00646081	None	None	2.65883
YRDC	0.677067	0.0132655	0.030308	None	None	1.87727
C1orf122	1.10487	0.126521	0.199266	None	None	0.897838
MTF1	-0.715989	3.68711e-05	0.000173206	None	None	4.43331
INPP5B	-1.94471	1.54242e-13	3.77791e-12	None	None	12.8118
SF3A3	-0.48565	0.00214166	0.00632744	None	None	2.66925
FHL3	-0.448954	0.612495	0.693497	None	None	0.212897
UTP11	-0.324416	0.180125	0.263	None	None	0.744426
MIR3659HG	3.7579	0.0988676	0.1629	None	None	1.00495
AL354702.2	0	1	NA	None	None	0
RRAGC	0.154513	0.318633	0.409478	None	None	0.496709
AL139260.1	0.529809	0.0001203	0.000499207	None	None	3.91973
MYCBP	2.63893	6.18088e-06	3.4448e-05	None	None	5.20895
GJA9	10.2735	7.96338e-17	3.62597e-15	None	None	16.0989
RHBDL2	3.28432	1.29873e-05	6.74378e-05	None	None	4.88648
AKIRIN1	-0.179397	0.420162	0.513614	None	None	0.376584
NDUFS5	1.90704	2.52748e-05	0.000122878	None	oxidative phosphorylation	4.59731
MACF1	-0.23177	0.137449	0.212817	None	None	0.861857
AL442071.2	3.55193	0.0339448	0.0671753	None	None	1.46923
BMP8A	8.56687	6.23494e-12	1.10814e-10	None	None	11.2052
PABPC4	0.339978	0.0672938	0.118346	None	None	1.17202
HEYL	-4.07477	0.120985	0.192297	None	None	0.917268
PPIE	0.326022	0.483631	0.574064	None	None	0.315486
BMP8B	5.61112	0.0508478	0.0938711	None	None	1.29373
OXCT2	NA	NA	NA	None	None	NA
AL033527.4	-2.34959	0.493675	NA	None	None	0.306559
LINC02811	0	1	NA	None	None	0
TRIT1	-0.694249	0.00113816	0.00365527	None	None	2.9438
MYCL	5.27513	0.00425076	0.0114385	None	None	2.37153
MFSD2A	-0.680642	0.165303	0.246441	None	None	0.78172
CAP1	0.42648	0.00202481	0.00603603	None	None	2.69362
PPT1	2.30392	4.88352e-36	1.89803e-33	None	None	35.3113
RLF	0.483011	1.16601e-05	6.13659e-05	None	None	4.9333
TMCO2	4.90995	0.248741	0.337109	None	None	0.604253
AL050341.2	0.524744	0.677204	0.750914	None	None	0.169281
ZMPSTE24	-0.482483	0.0131935	0.0301702	None	None	1.87964
COL9A2	0.191444	NA	NA	None	None	NA
SMAP2	-0.227033	0.44023	0.533179	None	None	0.35632
ZFP69B	-0.590639	0.893393	NA	None	None	0.0489575
ZFP69	2.29403	0.111806	0.18007	None	None	0.951534
AL603839.3	0.594965	0.138498	0.214071	None	None	0.858555
EXO5	0.712549	0.606679	0.688092	None	None	0.217041
ZNF684	0.661912	0.0612998	0.109411	None	None	1.21254
RIMS3	3.66206	0.345658	NA	None	None	0.461354
AL031289.2	NA	NA	NA	None	None	NA
AL031289.1	5.45993	0.0785213	0.134654	None	None	1.10501
NFYC-AS1	8.09875	2.82735e-11	4.37242e-10	None	None	10.5486
NFYC	-0.623665	0.00201039	0.00600088	None	None	2.69672
KCNQ4	-3.4716	0.018351	0.0400522	None	None	1.73634
CITED4	7.17254	3.40035e-10	4.19675e-09	None	None	9.46848
AC119677.1	3.57588	0.331565	NA	None	None	0.479431
CTPS1	-0.268193	0.549425	0.636178	None	None	0.260092
SLFNL1-AS1	-0.520068	0.158734	0.238861	None	None	0.79933
SLFNL1	2.46603	0.130982	0.204804	None	None	0.88279
SCMH1	-2.9261	3.89962e-20	2.77952e-18	None	None	19.409
AC093151.8	-5.10223	NA	NA	None	None	NA
FOXO6	0.534437	0.157469	0.237304	None	None	0.802804
AC093151.2	6.01696	0.157004	0.236759	None	None	0.804089
HIVEP3	-0.421335	0.422534	0.515841	None	None	0.374138
GUCA2B	NA	NA	NA	None	None	NA
GUCA2A	0	1	NA	None	None	0
FOXJ3	-0.0687828	0.727357	0.793288	None	None	0.138252
RIMKLA	3.72939	0.000478153	0.00169455	None	None	3.32043
ZMYND12	2.92912	0.483076	0.573538	None	None	0.315984
PPCS	0.519542	0.000143215	0.000583251	None	None	3.84401
CCDC30	0.123669	0.626475	0.706722	None	None	0.203097
PPIH	-0.0525485	0.698119	0.768397	None	None	0.156071
AC098484.4	2.48361	NA	NA	None	None	NA
YBX1	0.352281	0.172946	0.254714	None	None	0.76209
CLDN19	-1.41867	0.355468	0.448011	None	None	0.449199
P3H1	-0.170792	0.561259	0.647406	None	None	0.250837
C1orf50	2.03993	NA	NA	None	None	NA
TMEM269	4.41423	5.42424e-07	3.68881e-06	None	None	6.26566
SVBP	1.36666	6.87352e-07	4.58955e-06	None	None	6.16282
ERMAP	-0.566869	0.00369261	0.0101432	None	None	2.43267
AL512353.1	2.48894	0.0407161	0.078187	None	None	1.39023
ZNF691	-0.8494	0.00130217	0.00412098	None	None	2.88533
SLC2A1	-0.0560275	0.889769	0.926516	None	None	0.0507229
SLC2A1-AS1	-1.13975	0.00239992	0.00699929	None	None	2.6198
AC099795.1	9.30689	1.5404e-07	1.15679e-06	None	None	6.81237
FAM183A	-0.131094	0.778958	0.837593	None	None	0.108486
EBNA1BP2	1.22695	6.81175e-14	1.81991e-12	None	None	13.1667
CFAP57	2.73952	0.0302732	0.061095	None	None	1.51894
TMEM125	2.15988	0.0469392	0.0878317	None	None	1.32846
C1orf210	6.74317	0.000436367	0.00156514	None	None	3.36015
TIE1	-2.42898	0.0313784	0.0629554	None	None	1.50337
AL139289.2	1.37759	0.153185	0.232087	None	None	0.814784
CDC20	0.892579	0.257264	0.345937	None	None	0.589621
ELOVL1	0.965835	3.38535e-06	1.99928e-05	None	None	5.4704
MED8	1.03107	9.19021e-07	5.9889e-06	None	None	6.03667
SZT2	-0.364103	0.0484917	0.090282	None	None	1.31433
HYI	0.255603	0.829241	0.878589	None	None	0.0813195
HYI-AS1	NA	NA	NA	None	None	NA
PTPRF	-1.02753	1.76015e-08	1.56484e-07	None	None	7.75445
KDM4A	1.92344	0.216354	0.302824	None	None	0.664835
KDM4A-AS1	2.94221	0.002698	0.00774993	None	None	2.56896
ST3GAL3	-1.16772	0.41431	0.507605	None	None	0.382675
AL451062.1	7.913	1.93261e-09	2.06804e-08	None	None	8.71386
ARTN	0.371122	0.893853	0.929595	None	None	0.0487337
AL357079.1	4.82781	0.00618178	0.0158047	None	None	2.20889
IPO13	-1.65369	0.0126983	0.0291737	None	None	1.89626
DPH2	-1.33191	0.193854	0.278039	None	None	0.712525
ATP6V0B	0.557255	0.125503	0.197996	None	None	0.901345
B4GALT2	-1.09289	0.0150337	0.033723	None	None	1.82294
CCDC24	0.787729	0.0443535	0.0838661	None	None	1.35307
SLC6A9	-0.377647	0.652067	0.728926	None	None	0.185708
AL139220.2	4.50282	0.00339156	0.00942053	None	None	2.4696
DMAP1	0.365609	0.299566	0.389544	None	None	0.523508
ERI3	-1.31682	1.39214e-08	1.2583e-07	None	None	7.85632
ERI3-IT1	NA	NA	NA	None	None	NA
RNF220	0.223794	0.429786	0.52333	None	None	0.366747
TMEM53	1.21911	4.15778e-05	0.000193114	None	None	4.38114
ARMH1	1.37066	0.00137025	0.00430927	None	None	2.8632
KIF2C	-0.215368	0.763466	0.823988	None	None	0.11721
AL592166.1	1.54657	0.172439	0.25421	None	None	0.763364
RPS8	2.44212	1.91006e-09	2.04817e-08	None	cytoplasmic translation	8.71895
BEST4	-4.91858	0.0212807	0.0453243	None	None	1.67201
PLK3	1.39843	5.12633e-06	2.90502e-05	None	None	5.29019
TCTEX1D4	7.20277	0.0044291	0.0118626	None	None	2.35368
BTBD19	0.6906	0.0416215	0.0796655	None	None	1.38068
PTCH2	3.30264	0.001147	0.00368196	None	None	2.94044
EIF2B3	-0.283473	0.321336	0.412206	None	None	0.49304
HECTD3	0.476162	0.02814	0.0573973	None	None	1.55068
UROD	0.647721	0.39511	0.488322	None	None	0.403282
ZSWIM5	-0.0162629	0.958368	0.97754	None	None	0.0184677
LINC01144	NA	NA	NA	None	None	NA
HPDL	5.36849	0.00233399	0.00682537	None	None	2.6319
MUTYH	0.740348	0.00395665	0.0107637	None	None	2.40267
TOE1	0.395785	0.172649	0.254391	None	None	0.762837
TESK2	-1.59921	4.13162e-05	0.000192029	cell-substrate adhesion_x000D_	None	4.38388
CCDC163	7.26421	0.00227099	0.00666099	None	None	2.64378
MMACHC	2.60569	0.0903422	0.151113	None	None	1.04411
PRDX1	1.72208	4.42017e-06	2.54261e-05	None	None	5.35456
AKR1A1	1.23083	2.1794e-05	0.000107539	None	None	4.66166
NASP	-0.496314	4.67263e-05	0.000214608	None	None	4.33044
CCDC17	2.39833	0.187885	0.271387	None	None	0.726107
GPBP1L1	0.0780255	0.630872	0.710495	None	None	0.200059
TMEM69	0.130236	0.476031	0.56702	None	None	0.322365
IPP	-0.757134	0.000218828	0.000847617	None	None	3.6599
AL604028.1	NA	NA	NA	None	None	NA
MAST2	-0.827465	9.84923e-06	5.26152e-05	None	None	5.0066
PIK3R3	2.05643	0.174382	0.256377	None	None	0.758498
AL358075.2	NA	NA	NA	None	None	NA
TSPAN1	6.47808	0.0573021	0.103598	None	None	1.24183
POMGNT1	0.915625	0.000163943	0.000657273	None	None	3.78531
LURAP1	-1.04744	0.0110609	0.0259297	None	None	1.95621
RAD54L	-1.11934	0.0515801	0.0949591	None	None	1.28752
LRRC41	-0.909824	1.54561e-07	1.16028e-06	None	None	6.8109
UQCRH	0.562998	0.00859052	0.0209193	None	None	2.06598
NSUN4	-0.344703	0.0337466	0.0668925	None	None	1.47177
FAAH	-0.391575	0.1196	0.190493	None	None	0.922268
MKNK1-AS1	8.37351	3.20565e-10	3.99234e-09	None	None	9.49408
MKNK1	-0.215329	0.398615	0.491532	None	None	0.399447
MOB3C	-2.21004	0.247455	0.335748	None	None	0.606504
ATPAF1	-0.976952	4.60343e-05	0.000211807	None	None	4.33692
TEX38	6.31807	0.0348429	0.0686953	None	None	1.45789
EFCAB14-AS1	4.29093	0.00263343	0.00760388	None	None	2.57948
EFCAB14	-0.538436	0.000504153	0.00177431	None	None	3.29744
CYP4B1	-6.05139	3.74325e-14	1.06945e-12	None	None	13.4268
CYP4X1	-2.975	0.492237	NA	None	None	0.307826
CYP4Z1	-9.27676	0.0289827	0.0588889	None	None	1.53786
CYP4A22-AS1	-1.55243	0.724662	NA	None	None	0.139865
PDZK1IP1	NA	NA	NA	None	None	NA
TAL1	-6.52778	0.00476033	0.0126152	None	None	2.32236
STIL	-0.81156	0.0112776	0.0263776	None	None	1.94778
CMPK1	-0.720271	5.15914e-05	0.000234495	None	None	4.28742
LINC01389	8.13438	9.15638e-10	1.04552e-08	None	None	9.03828
TRABD2B	-6.91257	0.00221673	0.00651668	None	None	2.65429
LINC02794	NA	NA	NA	None	None	NA
AL109659.1	NA	NA	NA	None	None	NA
SLC5A9	NA	NA	NA	None	None	NA
AL109659.2	NA	NA	NA	None	None	NA
SPATA6	-1.7489	0.1539	0.2329	None	None	0.812763
AGBL4	-2.65242	3.58781e-07	2.50951e-06	None	None	6.44517
BEND5	NA	NA	NA	None	None	NA
AC099788.1	2.8403	0.167648	0.249089	None	None	0.775602
ELAVL4	0	1	NA	None	None	0
FAF1	-1.12371	2.67119e-06	1.60701e-05	None	None	5.57329
CDKN2C	-0.311472	0.876344	0.916242	None	None	0.0573256
LINC01562	0.172014	0.894402	0.929977	None	None	0.0484674
RNF11	-0.345063	0.0383891	0.0745453	None	None	1.41579
AL162430.2	7.49747	2.67838e-11	4.16393e-10	None	None	10.5721
TTC39A	0.807607	0.0111973	0.0262166	None	None	1.95089
TTC39A-AS1	8.45651	1.25464e-09	1.39736e-08	None	None	8.90148
EPS15	-0.573713	0.000943814	0.00310123	None	None	3.02511
AC104170.1	-1.60186	8.51305e-09	8.03299e-08	None	None	8.06992
OSBPL9	0.44564	0.0161306	0.0358324	None	None	1.79235
NRDC	0.0776119	0.616128	0.696844	None	None	0.210329
RAB3B	-2.13614	5.38346e-14	1.47859e-12	None	None	13.2689
TXNDC12	0.263527	0.118411	0.188817	None	None	0.926609
KTI12	8.21434	5.46078e-11	7.84426e-10	None	None	10.2627
AL445685.1	8.29442	2.35384e-11	3.72116e-10	None	None	10.6282
BTF3L4	0.32457	0.0489572	0.0909842	None	None	1.31018
ZFYVE9	-1.28537	4.71363e-09	4.67707e-08	None	None	8.32664
CC2D1B	0.0286505	0.881473	0.919924	None	None	0.0547912
AL513218.1	NA	NA	NA	None	None	NA
AL513218.2	7.32176	5.2122e-06	2.95124e-05	None	None	5.28298
ORC1	-0.00918714	0.98931	1	None	None	0.00466765
PRPF38A	0.655332	1.01206e-06	6.5455e-06	None	None	5.99479
TUT4	-0.246351	0.254805	0.343256	None	None	0.593793
GPX7	5.77853	0.054437	0.099208	None	None	1.26411
SHISAL2A	2.63106	0.241487	0.329692	None	None	0.617106
COA7	1.92389	1.03483e-09	1.17123e-08	None	None	8.98513
ZYG11B	-0.638327	0.000383013	0.00139863	None	None	3.41679
ZYG11A	1.12923	0.0285222	0.0580906	None	None	1.54482
ECHDC2	-0.461844	0.229254	0.316754	None	None	0.639684
SCP2	-0.505207	0.0932551	0.155129	None	None	1.03033
PODN	-6.43245	0.130588	0.204262	None	None	0.884097
SLC1A7	NA	NA	NA	None	None	NA
CPT2	-0.856085	0.000255552	0.000974113	None	None	3.59252
AL606760.2	1.71355	0.367327	0.459945	None	None	0.434948
CZIB	2.20121	NA	NA	None	None	NA
AL606760.3	6.95403	0.00722426	0.0180773	None	None	2.14121
MAGOH	0.236689	0.113793	0.182707	None	None	0.943885
AL606760.1	7.92914	5.99496e-10	7.06465e-09	None	None	9.22221
LRP8	-2.15985	1.66999e-08	1.48853e-07	None	None	7.77729
LINC01771	-5.37045	3.95406e-07	2.7461e-06	None	None	6.40296
AC119428.2	-6.45263	0.0336775	0.0667833	None	None	1.47266
LINC02812	0	1	NA	None	None	0
GLIS1	2.58782	0.393984	0.487106	None	None	0.404522
NDC1	-0.374921	0.158257	0.238265	None	None	0.800636
YIPF1	-0.291076	0.0619933	0.110458	None	None	1.20765
DIO1	8.21509	7.65664e-14	2.02749e-12	None	None	13.116
HSPB11	-0.472857	0.0161883	0.0359451	None	None	1.7908
LRRC42	-0.450988	0.0039027	0.010631	None	None	2.40863
LDLRAD1	0.371141	0.93289	NA	None	None	0.0301696
TMEM59	1.2995	3.34438e-14	9.64859e-13	None	None	13.4757
TCEANC2	-0.346366	0.245752	0.333988	None	None	0.609502
CYB5RL	7.32084	2.6348e-05	0.000127614	None	None	4.57925
MRPL37	0.372504	0.0889634	0.14917	None	None	1.05079
SSBP3	-0.582186	0.0436405	0.082723	None	None	1.36011
SSBP3-AS1	0	1	NA	None	None	0
AC099796.2	6.56666	0.000883941	0.00292738	None	None	3.05358
ACOT11	1.2586	0.00266764	0.00767897	None	None	2.57387
MROH7	3.65779	0.0339338	0.0671665	None	None	1.46937
TTC4	1.74554	0.224746	0.311775	None	None	0.648308
PARS2	6.11538	9.98873e-08	7.79386e-07	None	None	7.00049
TTC22	0.371141	0.93289	NA	None	None	0.0301696
LEXM	NA	NA	NA	None	None	NA
DHCR24	0.802908	0.0415119	0.0794854	None	None	1.38183
AC096536.3	6.95354	2.39288e-09	2.52644e-08	None	None	8.62108
DHCR24-DT	NA	NA	NA	None	None	NA
USP24	-0.417626	0.117278	0.187359	None	None	0.930784
MIR4422HG	3.41794	0.368993	0.461667	None	None	0.432982
AL603840.1	-0.370291	0.717839	0.785527	None	None	0.143973
LINC01753	-4.89676	0.00556315	0.0144163	None	None	2.25468
AC119674.1	0.724107	0.306803	0.397	None	None	0.51314
PLPP3	-0.564647	0.0379035	0.0737135	None	None	1.42132
PRKAA2	1.52084	0.00931839	0.0224292	None	None	2.03066
FYB2	-0.996375	0.501494	0.591552	None	None	0.299734
DAB1	-1.21074	0.00955396	0.0228919	None	None	2.01982
OMA1	1.04471	0.489646	0.579901	None	None	0.310117
AL035411.3	0.371141	0.93289	NA	None	None	0.0301696
TACSTD2	11.7308	6.73474e-15	2.20906e-13	None	None	14.1717
MYSM1	0.178649	0.260794	0.349563	None	None	0.583703
AL136985.3	-0.590645	0.85634	0.900768	None	None	0.0673538
JUN	3.54497	3.45266e-11	5.19514e-10	None	None	10.4618
LINC01135	1.87669	0.000224334	0.000866503	None	None	3.6491
LINC01358	0.274271	0.895874	0.931085	None	None	0.047753
AC093425.1	4.65556	0.27432	0.363819	None	None	0.561742
FGGY	-0.225695	0.653042	0.729858	None	None	0.185059
HOOK1	0.328026	0.400278	0.493139	None	None	0.397638
CYP2J2	1.91496	0.00670599	0.0169451	None	None	2.17354
C1orf87	5.22299	0.219633	0.306345	None	None	0.658302
LINC01748	-0.255031	0.558194	0.644556	None	None	0.253215
AC099792.1	-6.12662	0.000314824	0.00117526	None	None	3.50193
NFIA	-3.0215	5.14499e-10	6.14742e-09	cartilage development	None	9.28862
NFIA-AS2	0.371107	0.900931	0.93502	None	None	0.0453087
TM2D1	0.378391	0.048633	0.0905043	None	None	1.31307
PATJ	1.87467	8.64106e-05	0.000371757	None	None	4.06343
L1TD1	-1.64898	0.00413248	0.0111771	None	None	2.38379
KANK4	-3.07885	1.00123e-07	7.80928e-07	None	None	6.99947
USP1	-0.183573	0.344555	0.436769	None	None	0.462741
DOCK7	-0.594459	1.088e-05	5.75987e-05	None	None	4.96337
AC103923.1	-0.0332819	0.966487	0.983864	None	None	0.0148041
ATG4C	0.141836	0.623761	0.704196	None	None	0.204982
LINC01739	NA	NA	NA	None	None	NA
LINC00466	5.38749	0.196784	0.281321	None	None	0.706011
ALG6	0.0174767	0.947201	0.96884	None	None	0.0235578
ITGB3BP	-0.298222	0.426662	0.52011	None	None	0.369916
BX004807.1	8.73629	3.09083e-11	4.70918e-10	None	None	10.5099
EFCAB7	1.83105	0.000340676	0.00126012	None	None	3.46766
DLEU2L	5.41613	0.20295	0.288036	None	None	0.692612
PGM1	-1.99423	7.06198e-19	4.34238e-17	None	None	18.1511
ROR1	-1.11581	0.0493584	0.0916142	None	None	1.30664
ROR1-AS1	3.53512	0.0991503	0.163274	None	None	1.00371
AL445205.1	NA	NA	NA	None	None	NA
UBE2U	-6.97289	6.13905e-05	0.000274075	None	None	4.2119
CACHD1	-7.80826	1.26895e-09	1.41216e-08	None	None	8.89655
RAVER2	-1.50129	0.0123432	0.0284882	None	None	1.90857
JAK1	0.815309	0.00268703	0.00772183	None	None	2.57073
LINC01359	0	1	NA	None	None	0
AL357078.2	NA	NA	NA	None	None	NA
AK4	2.44522	7.01658e-40	3.90634e-37	None	oxidative phosphorylation	39.1539
DNAJC6	0.602607	0.20385	0.288995	None	None	0.69069
AL139294.1	4.9682	2.89897e-15	1.01731e-13	None	None	14.5378
LEPROT	1.81629	0.344925	0.437131	None	None	0.462275
LEPR	-0.13068	0.67611	0.749943	None	None	0.169982
AC119800.1	0	1	NA	None	None	0
PDE4B	2.07751	0.0169379	0.0373558	None	carbohydrate derivative catabolic process	1.77114
SGIP1	-2.01701	0.119767	0.190714	None	None	0.921663
AL139147.1	1.79871	0.677939	NA	None	None	0.168809
TCTEX1D1	-1.55244	0.699121	0.769089	None	None	0.155448
WDR78	0.29573	0.37311	0.465856	None	None	0.428163
MIER1	0.306416	0.0532173	0.0974348	None	None	1.27395
SLC35D1	-2.33442	3.3052e-05	0.000156623	None	None	4.4808
C1orf141	0	1	NA	None	None	0
IL23R	0	1	NA	None	None	0
IL12RB2	9.50129	6.62908e-16	2.59605e-14	None	None	15.1785
SERBP1	1.30203	4.80922e-14	1.33691e-12	None	None	13.3179
GADD45A	3.09404	4.16973e-13	9.28565e-12	None	None	12.3799
GNG12	-1.24869	1.16845e-05	6.14786e-05	None	None	4.93239
GNG12-AS1	-1.96913	7.70665e-10	8.93355e-09	None	None	9.11313
DIRAS3	-4.37734	0.306362	NA	None	None	0.513766
WLS	-1.89244	0.000505043	0.00177684	None	None	3.29667
DEPDC1	-0.162937	0.793801	0.850048	None	None	0.100288
AL033530.1	-0.0986942	0.896506	0.931648	None	None	0.0474468
AL691520.1	1.55634	0.680684	NA	None	None	0.167055
LINC01707	-2.67591	0.159552	0.239829	None	None	0.797097
LINC02791	NA	NA	NA	None	None	NA
LRRC7	0.688444	0.47248	0.563654	None	None	0.325616
LRRC40	0.224984	0.359692	0.452256	None	None	0.444069
SRSF11	0.164868	0.329798	0.421093	None	None	0.481753
ANKRD13C	-0.0502367	0.647714	0.725044	None	None	0.188617
HHLA3	1.05462	0.000107301	0.000450712	None	None	3.9694
CTH	4.23831	8.5567e-07	5.61873e-06	None	None	6.06769
PTGER3	-0.220592	0.887442	0.924514	None	None	0.0518599
ZRANB2-AS1	2.23697	0.0707376	0.123516	None	None	1.15035
ZRANB2	-0.286659	0.0348468	0.0686965	None	None	1.45784
ZRANB2-AS2	0.714129	0.666687	0.741648	None	None	0.176078
NEGR1	-0.344064	0.748828	0.811805	None	None	0.125618
AL513166.1	6.68498	0.00342396	0.00949005	None	None	2.46547
AL583808.1	0.951334	0.72945	0.795023	None	None	0.137005
LRRIQ3	5.9668	0.00111203	0.00358084	None	None	2.95388
FPGT	3.74733	NA	NA	None	None	NA
TNNI3K	7.07631	1.06592e-09	1.20114e-08	None	None	8.97228
ERICH3	NA	NA	NA	None	None	NA
CRYZ	0.94421	0.014513	0.0327406	None	None	1.83824
TYW3	-0.315328	0.22914	0.316689	None	None	0.6399
SLC44A5	-1.19016	0.000228892	0.000882453	None	None	3.64037
ACADM	-0.0630218	0.907507	0.940045	None	None	0.0421501
RABGGTB	1.03311	4.9603e-08	4.07567e-07	None	None	7.30449
MSH4	0.685239	0.0261924	0.0539808	None	None	1.58182
AC092813.1	0	1	1	None	None	0
ST6GALNAC3	-4.84114	0.000475749	0.00168732	None	None	3.32262
ST6GALNAC5	-1.16734	0.643951	0.721616	None	None	0.191147
AL035409.1	NA	NA	NA	None	None	NA
PIGK	-0.387503	0.173938	0.255906	None	None	0.759606
AK5	5.28818	0.000124718	0.000515552	None	None	3.90407
AC118549.1	0.423891	0.00594228	0.0152777	None	None	2.22605
USP33	-0.590708	3.07582e-05	0.0001468	None	None	4.51204
MIGA1	0.0328056	0.883812	0.921665	None	None	0.0536399
NEXN-AS1	8.35441	3.26882e-11	4.96201e-10	None	None	10.4856
NEXN	-0.0622631	0.834105	0.88279	None	None	0.0787791
FUBP1	-0.861296	3.34971e-08	2.85009e-07	None	None	7.47499
DNAJB4	2.114	NA	NA	None	None	NA
GIPC2	-0.441804	0.105599	0.171725	None	None	0.976338
AC103591.3	2.33709	0.135923	0.211008	None	None	0.866709
AC096531.2	0	1	NA	None	None	0
PTGFR	-5.66234	0.183823	0.267002	None	None	0.7356
IFI44L	-5.14263	0.0236484	0.0495667	None	None	1.6262
IFI44	-4.67311	0.118353	0.188744	None	None	0.926821
ADGRL4	-8.22025	3.9503e-09	3.98884e-08	None	None	8.40337
AC099671.1	-1.55241	0.724664	NA	None	None	0.139863
AL606519.1	NA	NA	NA	None	None	NA
AL136234.1	-2.9117	1.16274e-13	2.95694e-12	None	None	12.9345
LINC01781	6.02554	7.26964e-09	6.97472e-08	None	None	8.13849
ADGRL2	-0.85761	0.0244202	0.0509297	None	None	1.61225
AL157944.1	8.25851	3.17208e-11	4.82226e-10	None	None	10.4987
LINC01362	3.57107	0.00353255	0.00975822	None	None	2.45191
AC116099.1	0	1	1	None	None	0
LINC01725	-0.772159	0.128058	0.201133	None	None	0.892595
TTLL7	7.70584	2.45085e-08	2.12748e-07	None	None	7.61068
AC104454.2	NA	NA	NA	None	None	NA
AL359504.2	4.5875	0.277602	0.367219	None	None	0.556577
PRKACB	-0.50485	0.32436	0.415361	None	None	0.488973
SAMD13	1.06304	0.595146	0.677615	None	None	0.225376
RPF1	0.826732	1.01843e-08	9.47117e-08	None	None	7.99207
GNG5	1.31433	5.51907e-08	4.4989e-07	None	None	7.25813
SPATA1	3.38516	9.93557e-13	2.05073e-11	None	None	12.0028
CTBS	1.52284	1.03605e-07	8.05648e-07	None	carbohydrate derivative catabolic process	6.98462
AL359762.1	6.42671	0.0267675	0.0549845	None	None	1.57239
SSX2IP	-1.79953	2.20031e-06	1.34853e-05	None	None	5.65752
LPAR3	0.313256	0.813276	0.865682	None	None	0.089762
MCOLN2	4.74975	0.0185369	0.0404307	None	None	1.73196
WDR63	4.60769	5.30307e-05	0.000240242	None	None	4.27547
MCOLN3	-2.00397	0.20744	0.292896	None	None	0.683107
SYDE2	-0.104761	0.789317	0.846169	None	None	0.102748
C1orf52	0.312231	0.100952	0.165725	None	None	0.995885
BCL10	1.93783	9.42256e-24	1.06063e-21	None	None	23.0258
AL078459.1	1.76183	0.00190923	0.00572962	None	None	2.71914
DDAH1	-1.12584	0.113942	0.18291	None	None	0.943315
AC092807.3	NA	NA	NA	None	None	NA
CCN1	3.16259	0.0345353	0.0681934	None	None	1.46174
ZNHIT6	-0.358308	0.346582	0.438825	None	None	0.460194
COL24A1	-2.24566	0.335828	0.427469	None	None	0.473883
LINC02795	0.371109	0.932896	NA	None	None	0.0301669
ODF2L	2.13207	9.91599e-08	7.7459e-07	None	None	7.00366
CLCA4-AS1	4.26621	0.000258163	0.000983159	None	None	3.58811
AL049597.2	NA	NA	NA	None	None	NA
SH3GLB1	-0.318335	0.184557	0.267755	None	None	0.733869
AL355981.1	0.371107	0.932896	NA	None	None	0.0301668
SELENOF	-0.21558	0.188369	0.271858	None	None	0.72499
HS2ST1	0.288552	0.279401	0.369018	None	None	0.553771
LINC01140	2.96707	0.0414196	0.0793454	None	None	1.38279
LINC02801	-0.593181	0.720269	0.787726	None	None	0.142505
LMO4	1.72969	5.94024e-14	1.61134e-12	None	None	13.2262
PKN2-AS1	-0.479205	0.0672842	0.118339	None	None	1.17209
PKN2	-0.0812084	0.763151	0.823819	None	None	0.117389
GTF2B	0.461996	0.00174759	0.00530562	None	None	2.75756
KYAT3	-0.512359	0.000773795	0.00259547	None	None	3.11137
RBMXL1	1.36046	NA	NA	None	None	NA
GBP3	0.283505	0.444832	0.537488	None	None	0.351804
GBP1	-2.07569	0.000559086	0.00194472	cell-substrate adhesion_x000D_	None	3.25252
GBP2	-0.616499	0.0711363	0.124118	None	None	1.14791
AC104459.1	1.73903	0.461694	0.553286	None	None	0.335646
GBP4	1.85213	0.366956	0.459565	None	None	0.435387
GBP5	0	1	1	None	None	0
AL596214.1	4.27537	0.0490817	0.0911745	None	None	1.30908
LRRC8B	0.0218913	0.964257	0.982282	None	None	0.0158071
LRRC8C-DT	7.60955	5.55175e-10	6.59768e-09	None	None	9.25557
LRRC8C	1.63163	0.293701	0.383515	None	None	0.532094
AC099568.2	6.9932	0.000146404	0.000594593	None	None	3.83445
LRRC8D	5.2481	NA	NA	None	None	NA
ZNF326	0.681552	1.91683e-11	3.09684e-10	None	None	10.7174
AC098656.1	-0.783846	0.852594	NA	None	None	0.0692575
AL627316.1	0.371141	0.93289	NA	None	None	0.0301696
LINC02609	6.31538	3.03631e-08	2.59738e-07	None	None	7.51765
AC091614.1	0	1	NA	None	None	0
ZNF644	-1.1907	1.97171e-07	1.45262e-06	None	None	6.70516
HFM1	-1.83553	0.00057696	0.00199879	None	None	3.23885
CDC7	-1.58398	4.85256e-12	8.84583e-11	None	None	11.314
TGFBR3	-0.415258	0.0828915	0.140777	None	None	1.08149
BRDT	-0.335268	0.568355	0.65399	None	None	0.24538
EPHX4	-0.285414	0.806347	0.860137	None	None	0.0934781
BTBD8	-1.2346	2.1784e-07	1.59236e-06	None	None	6.66186
C1orf146	5.24516	0.217669	0.304191	None	None	0.662203
GLMN	-0.322025	0.0718771	0.125162	None	None	1.14341
RPAP2	-0.601628	0.000624443	0.00214453	None	None	3.20451
GFI1	2.92692	0.210738	0.296493	None	None	0.676256
EVI5	-1.4337	9.41331e-29	1.86447e-26	None	None	28.0263
RPL5	2.42066	3.19042e-09	3.28269e-08	None	cytoplasmic translation	8.49615
DIPK1A	1.36624	NA	NA	None	None	NA
AC093577.1	0	1	1	None	None	0
MTF2	-0.063946	0.639388	0.717674	None	None	0.194236
TMED5	0.731517	0.00662228	0.0167652	None	None	2.17899
CCDC18	1.74957	2.49593e-10	3.15228e-09	None	None	9.60277
CCDC18-AS1	1.55521	0.475042	0.566121	None	None	0.323268
DR1	-0.222185	0.280498	0.36991	None	None	0.55207
FNBP1L	0.359266	0.352865	0.445465	None	None	0.452392
BCAR3	-0.298206	0.246302	0.334602	None	None	0.608533
AL109613.1	9.19679	1.74353e-12	3.43527e-11	None	None	11.7586
AL049796.1	6.80532	0.00295149	0.00838128	None	None	2.52996
DNTTIP2	0.84674	0.00267662	0.00769835	None	None	2.57241
GCLM	-1.17908	0.00119824	0.00382854	None	None	2.92146
ABCA4	-2.14556	0.0259164	0.0535298	None	None	1.58642
ARHGAP29	0.0949441	0.821101	0.872208	None	None	0.0856035
ARHGAP29-AS1	0.437783	0.747483	0.810603	None	None	0.126399
AC097059.1	0	1	NA	None	None	0
ABCD3	-0.639931	0.00119755	0.00382751	None	None	2.92171
F3	-1.84628	0.0253573	0.0525752	None	None	1.5959
SLC44A3	0.451234	0.112572	0.181007	None	None	0.948568
CNN3	-0.639389	0.00525141	0.0137053	None	None	2.27972
AC105942.1	-0.84702	0.317492	0.408292	None	None	0.498267
ALG14	-1.19926	1.16636e-07	8.97156e-07	None	None	6.93317
TLCD4	-0.240657	0.881985	0.920272	None	None	0.0545386
AC092802.1	2.84089	0.0318375	0.0637029	None	None	1.49706
RWDD3	1.74497	0.262895	0.351899	None	None	0.580218
AC092802.4	NA	NA	NA	None	None	NA
LINC01787	0.371141	0.93289	NA	None	None	0.0301696
PTBP2	-0.543378	0.00602046	0.0154556	None	None	2.22037
DPYD	-2.79404	0.00631891	0.01612	None	None	2.19936
DPYD-AS1	-5.8378	0.0783339	0.134355	None	None	1.10605
DPYD-IT1	NA	NA	NA	None	None	NA
MIR137HG	0	1	1	None	None	0
BX005019.1	0	1	NA	None	None	0
SNX7	-0.83631	5.9006e-05	0.000264634	None	None	4.2291
AL445433.2	-1.84446	0.671012	NA	None	None	0.173269
PLPPR4	0.371103	0.932897	NA	None	None	0.0301664
LINC01708	1.90427	0.135491	0.21045	None	None	0.868089
PALMD	3.97492	0.00109054	0.00352101	None	None	2.96236
FRRS1	0.906096	0.0465007	0.0871264	None	None	1.33254
AGL	-1.03242	0.000123485	0.000511188	None	None	3.90839
AC118553.1	6.20364	0.144478	0.221354	None	None	0.840198
SLC35A3	1.21076	NA	NA	None	None	NA
MFSD14A	1.97817	NA	NA	None	None	NA
AC093019.2	2.93791	2.54536e-10	3.21077e-09	None	None	9.59425
SASS6	0.789627	7.50115e-05	0.000328453	None	None	4.12487
TRMT13	-0.32828	0.151317	0.229883	None	None	0.820112
LRRC39	1.73907	1.96631e-07	1.44916e-06	None	None	6.70635
DBT	0.310306	0.286544	0.375885	None	None	0.542808
AL445928.2	3.38923	0.0190791	0.0413292	None	None	1.71944
RTCA-AS1	3.77778	0.00200495	0.00598983	None	None	2.6979
RTCA	-0.0554713	0.893761	0.929546	None	None	0.0487784
CDC14A	-1.98857	9.76791e-17	4.37411e-15	None	None	16.0102
AL589990.1	7.83934	3.21701e-09	3.30675e-08	None	None	8.49255
LINC01349	NA	NA	NA	None	None	NA
VCAM1	-7.93479	0.0618887	0.110297	cell-substrate adhesion_x000D_	None	1.20839
EXTL2	-0.135251	0.591279	0.674348	None	None	0.228208
AC104506.1	3.37357	0.0163317	0.0361933	None	None	1.78697
SLC30A7	-0.957874	5.46598e-11	7.84625e-10	None	None	10.2623
DPH5	0.169336	0.526052	0.614468	None	None	0.278971
AC093157.2	NA	NA	NA	None	None	NA
AC093157.1	-0.892969	4.65902e-05	0.000214126	None	None	4.33171
S1PR1	0	1	1	None	None	0
LINC01307	-6.90063	3.76533e-05	0.000176318	None	None	4.4242
LINC01709	NA	NA	NA	None	None	NA
OLFM3	5.63522	0.185171	0.268389	None	None	0.732427
AC099567.1	6.6527	7.85697e-07	5.19736e-06	None	None	6.10475
COL11A1	-0.607141	0.373465	0.466258	None	None	0.42775
AC095032.1	0.700963	0.679563	0.752638	None	None	0.167771
RNPC3	0.0276729	0.838075	0.885944	None	None	0.076717
AMY2B	-1.04639	0.00203426	0.00606157	None	None	2.69159
AL591888.1	0	1	NA	None	None	0
LINC01676	-6.52334	0.125197	0.197559	None	None	0.902406
LINC01677	NA	NA	NA	None	None	NA
AL355306.2	0.371141	0.93289	NA	None	None	0.0301696
PRMT6	0.0739445	0.959607	0.978562	None	None	0.0179065
NTNG1	0.863436	0.414879	0.508128	None	None	0.382079
VAV3	-0.148068	0.476045	0.56702	None	None	0.322352
VAV3-AS1	NA	NA	NA	None	None	NA
LINC02785	0	1	NA	None	None	0
SLC25A24	-0.782115	0.0489929	0.0910341	None	None	1.30987
FAM102B	-1.71193	0.00185982	0.00560258	None	None	2.73053
HENMT1	5.18318	2.42692e-05	0.000118409	None	None	4.61494
AL160171.1	6.48503	0.00242035	0.00705188	None	None	2.61612
PRPF38B	-0.519028	0.00683559	0.0172156	None	None	2.16522
FNDC7	3.09293	0.156767	0.236488	None	None	0.804746
STXBP3	-0.12729	0.378223	0.470984	None	None	0.422252
AKNAD1	1.50446	0.0151039	0.0338548	None	None	1.82091
SPATA42	-9.01829	1.40473e-05	7.24123e-05	None	None	4.85241
GPSM2	-0.466125	0.00838395	0.0204986	None	None	2.07655
CLCC1	1.62008	NA	NA	None	None	NA
WDR47	0.478512	0.0578097	0.104357	None	None	1.238
TAF13	0.864237	0.00100387	0.00327465	None	None	2.99832
AL356488.3	2.43896	0.00684585	0.0172393	None	None	2.16457
TMEM167B	1.00454	3.74822e-08	3.15527e-07	None	None	7.42618
AL356488.2	-0.574133	0.730945	0.796315	None	None	0.136115
KIAA1324	-0.695419	0.103009	0.168443	None	None	0.987126
SARS	0.342104	0.0162027	0.0359656	None	None	1.79041
CELSR2	6.45417	1.71707e-05	8.65636e-05	None	None	4.76521
PSRC1	0.454406	0.651379	0.728315	None	None	0.186166
MYBPHL	5.79556	0.172914	0.254705	None	None	0.76217
SORT1	-0.108221	0.664353	0.74001	None	None	0.177601
PSMA5	-0.108608	0.288758	0.378115	None	None	0.539466
SYPL2	1.81245	0.522858	0.611487	None	None	0.281616
ATXN7L2	2.06681	0.251241	0.339699	None	None	0.599909
CYB561D1	2.08021	1.41333e-21	1.19316e-19	None	None	20.8498
AMIGO1	NA	NA	NA	None	None	NA
GNAI3	0.559819	0.00215052	0.00634833	None	None	2.66746
AL355310.1	NA	NA	NA	None	None	NA
AMPD2	-1.07455	0.0012279	0.00391358	None	None	2.91084
GSTM4	-1.17754	0.625721	0.706027	None	None	0.203619
GSTM2	1.8569	NA	NA	None	None	NA
GSTM3	-0.0263491	0.976351	0.991416	None	None	0.0103938
LINC01768	0.371141	0.93289	NA	None	None	0.0301696
CSF1	-3.83163	0.28103	0.370421	cell-substrate adhesion_x000D_	None	0.551247
AHCYL1	-0.0868847	0.405985	0.499038	None	None	0.39149
STRIP1	-0.336719	0.0220518	0.0467249	None	None	1.65656
AL160006.1	1.23812	0.424699	0.518085	None	None	0.371918
LINC01397	NA	NA	NA	None	None	NA
SLC6A17	-6.96171	0.0376777	0.0732963	None	None	1.42392
LINC02586	NA	NA	NA	None	None	NA
KCNC4	-4.36217	7.6154e-05	0.000332915	None	None	4.11831
RBM15-AS1	0.269519	0.833061	0.881907	None	None	0.0793234
RBM15	0.156517	0.457946	0.549722	None	None	0.339186
LAMTOR5-AS1	1.0289	NA	NA	None	None	NA
SLC16A4	0.0850143	0.756364	0.81815	None	None	0.121269
AL355488.1	-1.21998	0.000545508	0.00190166	None	None	3.2632
LAMTOR5	0.689664	0.00109316	0.00352701	None	None	2.96132
PROK1	NA	NA	NA	None	None	NA
CD53	-2.27703	NA	NA	None	None	NA
AL360270.2	3.60646	0.0224662	0.0475037	None	None	1.64847
AL360270.1	9.03008	5.26879e-14	1.45096e-12	None	None	13.2783
LRIF1	1.08583	3.05984e-08	2.61642e-07	None	None	7.5143
AL360270.3	1.45344	0.738507	NA	None	None	0.131645
DRAM2	-0.466079	0.0383156	0.0744166	None	None	1.41662
CEPT1	-0.187229	0.43503	0.528216	None	None	0.361481
AL355816.2	6.21535	3.65114e-06	2.13361e-05	None	None	5.43757
DENND2D	0.981621	0.000980407	0.00320919	None	None	3.00859
CHI3L2	1.65087	0.240061	0.328223	None	carbohydrate derivative catabolic process	0.619679
PIFO	6.64371	0.000155206	0.000626635	None	None	3.80909
OVGP1	0.796272	0.00436429	0.0117012	None	None	2.36009
AL390195.2	6.74611	0.000219322	0.000849053	None	None	3.65892
AL390195.1	0.793319	0.671255	0.745763	None	None	0.173112
WDR77	-0.0621022	0.798279	0.853717	None	None	0.097845
ATP5PB	0.0253549	0.878391	0.917824	None	None	0.056312
C1orf162	0.78391	0.59263	0.675534	None	None	0.227216
TMIGD3	5.85723	0.0299168	0.0604958	None	None	1.52408
ADORA3	NA	NA	NA	None	None	NA
RAP1A	-0.346669	0.0693439	0.121433	None	None	1.15899
LINC01160	NA	NA	NA	None	None	NA
INKA2	2.95755	5.17464e-14	1.42694e-12	None	None	13.2861
INKA2-AS1	0.371121	0.932893	NA	None	None	0.0301679
AL049557.1	-0.590618	0.893397	NA	None	None	0.0489556
DDX20	0.271655	0.1995	0.284336	None	None	0.700056
KCND3	4.22075	0.131529	0.205504	None	None	0.880979
AL445426.1	0	1	1	None	None	0
CTTNBP2NL	0.423684	0.0332268	0.0660336	None	None	1.47851
WNT2B	0.453973	0.141446	0.217631	None	None	0.849409
ST7L	-0.581099	0.00489609	0.0129251	None	None	2.31015
CAPZA1	0.666836	4.17582e-09	4.1919e-08	None	None	8.37926
MOV10	-0.846021	1.14747e-09	1.28601e-08	None	None	8.94026
AL603832.1	-0.300384	0.917241	0.94684	None	None	0.0375167
RHOC	0.225911	0.487211	0.577449	None	None	0.312283
PPM1J	0	1	NA	None	None	0
LINC01356	1.41957	0.0645569	0.114285	None	None	1.19006
LINC01357	1.37702	0.497142	0.587327	None	None	0.303519
SLC16A1	1.52421	2.50216e-09	2.63103e-08	None	None	8.60169
SLC16A1-AS1	-0.885939	0.000763927	0.00256623	None	None	3.11695
AL390242.1	8.28024	1.10179e-09	1.23953e-08	None	None	8.9579
LRIG2-DT	2.682	NA	NA	None	None	NA
LRIG2	0.0173054	0.890483	0.927078	None	None	0.0503742
MAGI3	-2.52132	3.42681e-11	5.16756e-10	None	None	10.4651
PHTF1	-0.778529	0.00611923	0.015672	None	None	2.2133
RSBN1	-0.247774	0.019672	0.0424007	None	None	1.70615
AL137856.1	6.42243	0.00566331	0.0146335	None	None	2.24693
PTPN22	-1.71585	0.303122	0.393274	None	None	0.518382
AP4B1-AS1	6.85998	4.91212e-05	0.000224655	None	None	4.30873
BCL2L15	0	1	NA	None	None	0
AP4B1	-1.24598	0.173186	0.254957	None	None	0.761487
DCLRE1B	5.04529	0.012405	0.0285892	None	None	1.9064
HIPK1-AS1	5.3716	0.0181424	0.0396558	None	None	1.7413
HIPK1	-0.154785	0.375155	0.467927	None	None	0.425789
OLFML3	-6.08181	0.0430652	0.0818293	None	None	1.36587
SYT6	NA	NA	NA	None	None	NA
TRIM33	-0.166988	0.521249	0.610034	None	None	0.282955
BCAS2	1.35075	1.66678e-07	1.24219e-06	None	None	6.77812
DENND2C	7.10733	4.84075e-13	1.06998e-11	None	None	12.3151
AMPD1	0	1	NA	None	None	0
NRAS	1.41626	1.69347e-11	2.76197e-10	None	None	10.7712
CSDE1	0.00471859	0.972177	0.988444	None	None	0.0122546
SIKE1	0.740983	0.000390185	0.0014218	None	None	3.40873
SYCP1	NA	NA	NA	None	None	NA
TSPAN2	2.98408	0.161573	0.242159	None	None	0.791632
NGF-AS1	7.26827	3.16904e-06	1.88396e-05	None	None	5.49907
NGF	2.25411	0.0418894	0.0800743	None	None	1.3779
VANGL1	0.676258	0.369432	0.462104	None	None	0.432466
CASQ2	0.371132	0.932892	NA	None	None	0.0301688
SLC22A15	-1.32828	0.00126575	0.00401806	None	None	2.89765
MAB21L3	0.327099	0.512923	0.602103	None	None	0.289948
AL355538.1	0	1	NA	None	None	0
ATP1A1	1.95616	2.72535e-09	2.8425e-08	None	None	8.56458
ATP1A1-AS1	2.37093	0.11574	0.18527	None	None	0.936517
LINC01762	0.201408	0.689715	0.76106	None	None	0.16133
AL390066.1	0	1	NA	None	None	0
AL390066.2	0	1	NA	None	None	0
CD58	0.262799	0.336876	0.428458	None	None	0.47253
IGSF3	-0.261376	0.225292	0.312322	None	None	0.647253
CD2	0	1	1	None	None	0
AL157904.1	0	1	NA	None	None	0
PTGFRN	0.478645	0.345655	0.437839	None	None	0.461357
CD101	3.43968	0.0319218	0.0638219	None	None	1.49591
AL445231.1	4.76495	0.0220273	0.0466858	None	None	1.65704
TTF2	-0.345227	0.127686	0.200626	None	None	0.893857
TRIM45	0.127728	0.806273	0.860137	None	None	0.0935176
VTCN1	-1.80153	0.0300372	0.0607021	None	None	1.52234
LINC01525	5.62444	0.0142534	0.0322466	None	None	1.84608
AL358072.1	-2.08553	0.169257	0.250908	None	None	0.771454
MAN1A2	-1.99404	4.9058e-19	3.08093e-17	None	None	18.3093
TENT5C	4.37508	0.00147432	0.00458824	None	None	2.83141
GDAP2	-0.447575	0.00740278	0.0184545	None	None	2.1306
WDR3	0.836801	0.00279812	0.00799425	None	None	2.55313
SPAG17	-0.114251	0.808823	0.862099	None	None	0.0921468
TBX15	-0.508182	0.721619	0.788742	None	None	0.141692
WARS2	-0.352158	0.185263	0.268494	None	None	0.732211
WARS2-AS1	0.571885	NA	NA	None	None	NA
AL359915.1	8.21647	1.29523e-10	1.73362e-09	None	None	9.88765
LINC01780	-2.2427	0.609078	NA	None	None	0.215327
HSD3B2	NA	NA	NA	None	None	NA
HSD3B1	-2.08734	3.25422e-16	1.33862e-14	None	None	15.4876
LINC00622	6.11103	0.0148732	0.0334322	None	None	1.8276
ZNF697	0.636727	0.022853	0.048198	None	None	1.64106
PHGDH	1.26869	0.0105677	0.0249351	None	None	1.97602
HMGCS2	-10.062	2.04745e-12	3.98937e-11	connective tissue development	None	11.6888
NOTCH2	0.760229	0.0328328	0.0653804	None	None	1.48369
SEC22B	-0.9445	1.173e-05	6.1671e-05	None	None	4.9307
NBPF26	-0.525385	0.197359	0.282007	None	None	0.704742
AC253572.2	8.24028	0.000133337	0.000547134	None	None	3.87505
LINC00623	-1.66286	0.00267495	0.00769787	None	None	2.57268
FCGR1B	0	1	NA	None	None	0
AC244453.3	0.13331	0.936154	0.960112	None	None	0.0286525
AC244453.2	-1.55239	0.724669	NA	None	None	0.139861
AC244453.1	-9.19768	0.030382	0.0612547	None	None	1.51738
FAM72B	5.42703	0.202037	0.286978	None	None	0.69457
SRGAP2C	-0.514891	0.0531745	0.0973724	None	None	1.2743
LINC02798	0.447048	0.772817	0.832249	None	None	0.111923
AC239800.2	NA	NA	NA	None	None	NA
LINC02591	1.35007	0.492474	0.582648	None	None	0.307616
HIST2H3PS2	5.26595	0.0215206	0.0457768	None	None	1.66715
AC246680.1	-10.11	0.0173062	0.0380663	None	None	1.7618
LINC02802	3.02326	0.020611	0.0441107	None	None	1.6859
NBPF15	-0.722041	0.29366	0.383486	None	None	0.532155
FP700111.1	-3.57642	0.0238485	0.049904	None	None	1.62254
SRGAP2B	0.182679	0.586193	0.669679	None	None	0.23196
FAM72D	3.28282	0.441218	NA	None	None	0.355347
NBPF20	-1.77259	0.406197	0.499151	None	None	0.391263
GPR89A	-0.238441	0.248328	0.336689	None	None	0.604974
PDZK1	2.23226	0.0361431	0.0708115	None	None	1.44197
CD160	6.88369	4.70598e-06	2.68975e-05	None	None	5.32735
RNF115	-0.901524	0.000659058	0.00225028	None	None	3.18108
POLR3C	-0.0283575	0.881403	0.919897	None	None	0.0548257
NUDT17	6.74786	0.000234748	0.000902664	None	None	3.6294
PIAS3	1.03401	2.39464e-06	1.45723e-05	None	None	5.62076
ANKRD35	NA	NA	NA	None	None	NA
ITGA10	5.03882	0.0149272	0.0335377	None	None	1.82602
PEX11B	-0.169384	0.650554	0.72763	None	None	0.186716
RBM8A	1.48519	7.5818e-12	1.32354e-10	None	None	11.1202
LIX1L-AS1	9.70674	4.20497e-13	9.34392e-12	None	None	12.3762
LIX1L	-1.87597	0.231312	0.319014	None	None	0.635802
ANKRD34A	5.87086	0.167372	0.24877	None	None	0.776317
POLR3GL	2.3631	0.177783	0.260262	None	None	0.75011
TXNIP	-10.0156	2.09876e-14	6.22945e-13	None	None	13.678
HJV	-0.59065	0.893391	NA	None	None	0.0489584
AC239799.2	9.82348	7.42987e-14	1.97227e-12	None	None	13.129
LINC01719	0.865772	0.0221447	0.0469057	None	None	1.65473
NBPF10	-0.821723	0.090822	0.151817	None	None	1.04181
NOTCH2NLA	1.67136	NA	NA	None	None	NA
AC239799.1	NA	NA	NA	None	None	NA
AC245407.2	2.50958	NA	NA	None	None	NA
NBPF12	-0.00368165	0.991331	1	None	None	0.00378136
PRKAB2	1.03959	0.00262718	0.00759009	None	None	2.58051
AC242426.2	0.118842	0.678187	0.751639	None	None	0.168651
FMO5	1.8728	0.00295965	0.0083998	None	None	2.52876
CHD1L	-7.03606	0.000986035	0.00322453	None	None	3.00611
LINC00624	-0.975173	NA	NA	None	None	NA
BCL9	0.884054	0.000164511	0.000659163	None	None	3.78381
ACP6	-0.935518	0.00032128	0.00119503	None	None	3.49312
GJA5	0.663033	0.216006	0.302461	None	None	0.665534
GPR89B	-0.127298	0.603576	0.685244	None	None	0.219268
LINC02804	0.151041	0.945716	0.967765	None	None	0.0242392
NBPF11	-1.44879	5.5771e-15	1.85894e-13	None	None	14.2536
LINC02805	5.40141	0.0430366	0.081789	None	None	1.36616
AC239809.3	-3.56403	3.69056e-05	0.000173305	None	None	4.43291
LINC01731	-2.94369	0.0157923	0.0351835	None	None	1.80155
LINC01138	1.4034	NA	NA	None	None	NA
LINC02806	-4.27923	0.0233463	0.0490325	None	None	1.63178
AC245100.1	-2.37724	0.112175	0.180495	None	None	0.950104
AC245100.6	-10.5843	0.0127062	0.0291855	None	None	1.89598
PPIAL4G	-1.55239	0.724669	NA	None	None	0.139861
NBPF14	-1.7115	1.93042e-05	9.64229e-05	None	None	4.71435
NUDT4B	NA	NA	NA	None	None	NA
PDE4DIP	-2.91864	2.77415e-11	4.2966e-10	None	None	10.5569
AC239804.1	-7.15495	NA	NA	None	None	NA
NBPF9	-1.18166	0.000627776	0.0021549	None	None	3.2022
AC245297.3	-1.68002	2.20902e-05	0.00010886	None	None	4.6558
NOTCH2NLC	0.62261	NA	NA	None	None	NA
NBPF19	-3.33975	4.81096e-08	3.96087e-07	None	None	7.31777
AC242842.1	NA	NA	NA	None	None	NA
FCGR1A	1.33848	0.758987	NA	None	None	0.119765
HIST2H2BF	-1.79315	2.01231e-08	1.77143e-07	None	None	7.69631
AC243772.2	-1.33845	0.466265	0.557596	None	None	0.331367
HIST2H4A	1.33846	0.758992	NA	None	None	0.119763
HIST2H2AA4	8.82199	1.56404e-12	3.12489e-11	None	None	11.8058
HIST2H4B	6.6596	0.11712	0.187165	None	None	0.931368
AC239868.1	4.0135	0.0674171	0.118502	None	None	1.17123
HIST2H2BE	-0.826365	4.40531e-05	0.000203555	None	None	4.35602
HIST2H2AC	1.9383	4.28083e-06	2.46729e-05	None	None	5.36847
HIST2H2AB	6.27334	0.0726247	0.126202	None	None	1.13892
BOLA1	-0.520854	0.0241285	0.0503877	None	None	1.61747
SV2A	6.03718	0.0425886	0.0811322	None	None	1.37071
SF3B4	0.589654	0.0511673	0.0943764	None	None	1.29101
MTMR11	-1.07334	2.14487e-06	1.31573e-05	None	None	5.6686
OTUD7B	-1.09516	4.89148e-11	7.09574e-10	None	None	10.3106
AC244033.2	2.42671	0.227123	0.314447	None	None	0.643739
VPS45	-0.642659	0.00496679	0.0130883	None	None	2.30392
PLEKHO1	-2.63588	0.00972344	0.0232224	None	None	2.01218
AC242988.2	NA	NA	NA	None	None	NA
ANP32E	0.67245	0.000214808	0.000833931	None	None	3.66795
AC242988.1	-2.88388	0.506126	NA	None	None	0.295741
APH1A	0.0092859	0.970616	0.987051	None	None	0.0129528
C1orf54	-0.740129	0.0637048	0.113018	None	None	1.19583
CIART	NA	NA	NA	None	None	NA
MRPS21	0.40965	0.00920362	0.0221893	None	None	2.03604
PRPF3	-0.983845	1.88612e-14	5.62259e-13	None	None	13.7244
RPRD2	-1.25968	7.10893e-22	6.28484e-20	None	None	21.1482
TARS2	-0.0220352	0.938247	0.961738	None	None	0.027683
ECM1	2.43737	8.62734e-06	4.66443e-05	None	None	5.06412
FALEC	8.63429	1.46711e-08	1.32085e-07	None	None	7.83354
AL356356.1	-1.01282	0.00462674	0.0123007	None	None	2.33473
ADAMTSL4	0.327672	0.213147	0.299496	None	None	0.671322
ADAMTSL4-AS1	1.67042	0.422133	0.515442	None	None	0.374551
MCL1	1.85343	5.37976e-13	1.18395e-11	None	intrinsic apoptotic signaling pathway in response to DNA damage	12.2692
ENSA	0.839068	1.13093e-16	5.03154e-15	None	None	15.9466
GOLPH3L	-0.164827	0.355034	0.44749	None	None	0.449731
HORMAD1	-6.40729	0.00195844	0.00586622	None	None	2.70809
CTSS	1.68056	0.0969183	0.160098	None	None	1.01359
CTSK	-0.926416	0.000110487	0.000462021	None	None	3.95669
ARNT	-0.77856	7.21276e-05	0.000317063	None	None	4.1419
CTXND2	3.41001	0.0124372	0.0286538	None	None	1.90528
SETDB1	-0.156691	0.270068	0.359403	None	None	0.568526
CERS2	0.152037	0.517298	0.606133	None	None	0.286259
ANXA9	6.10394	0.000150848	0.000610597	None	None	3.82146
MINDY1	3.69872	0.000103958	0.000438369	None	None	3.98314
PRUNE1	-0.147889	0.487464	0.577715	None	None	0.312057
BNIPL	2.32424	2.32748e-06	1.4214e-05	None	None	5.63311
C1orf56	2.23708	0.0376783	0.0732963	None	None	1.42391
CDC42SE1	-0.794668	1.1126e-12	2.27591e-11	None	None	11.9537
MLLT11	3.55574	0.00648721	0.0164812	None	None	2.18794
GABPB2	-2.57122	4.24309e-15	1.44497e-13	None	None	14.3723
SEMA6C	1.79017	0.256146	0.34477	None	None	0.591512
SCNM1	1.34516	1.95743e-07	1.44313e-06	None	None	6.70831
LYSMD1	0.25733	0.218598	0.305261	None	None	0.660354
VPS72	-0.363469	0.0466793	0.0873974	None	None	1.33088
PIP5K1A	-0.593947	0.0175492	0.0385308	None	None	1.75574
PSMD4	0.368117	0.0159316	0.0354477	None	None	1.79774
ZNF687-AS1	8.57616	1.85908e-11	3.01062e-10	None	None	10.7307
ZNF687	0.697471	0.00866965	0.021092	None	None	2.062
PI4KB	-0.653077	9.11535e-08	7.17764e-07	None	None	7.04023
RFX5	0.821979	0.62652	0.706735	None	None	0.203065
SELENBP1	-3.8882	0.042886	0.0815405	None	None	1.36768
PSMB4	0.706963	0.0398954	0.0768762	None	None	1.39908
POGZ	-0.977175	3.7306e-05	0.000175006	None	None	4.42822
CGN	2.31422	0.00357504	0.00986237	None	None	2.44672
TUFT1	-0.52879	0.172756	0.254531	None	None	0.762568
AL365436.2	6.78832	1.81837e-10	2.37669e-09	None	None	9.74032
SNX27	0.263769	0.114734	0.183965	None	None	0.94031
AL391335.1	8.27716	1.80697e-10	2.36328e-09	None	None	9.74305
AL589765.1	1.85881	0.667566	NA	None	None	0.175506
RIIAD1	NA	NA	NA	None	None	NA
MRPL9	0.725587	0.000565296	0.001964	None	None	3.24772
OAZ3	4.52919	0.0346299	0.0683539	None	None	1.46055
AL589765.4	0.371141	0.93289	NA	None	None	0.0301696
TDRKH	1.85977	1.3649e-09	1.51321e-08	None	None	8.8649
TDRKH-AS1	3.17329	0.0296253	0.060011	None	None	1.52834
RORC	1.78175	0.229569	0.317035	None	None	0.639087
C2CD4D	6.94394	0.0274464	0.0561606	None	None	1.56151
C2CD4D-AS1	0.8208	0.634163	0.713248	None	None	0.197799
THEM5	8.7166	4.79363e-07	3.28817e-06	None	None	6.31934
THEM4	0.857858	0.0107398	0.0252844	None	None	1.969
AL450992.3	4.27878	0.315441	NA	None	None	0.501082
S100A10	2.63913	2.63888e-05	0.000127781	None	None	4.57858
AL450992.1	9.35092	6.01172e-13	1.30766e-11	None	None	12.221
S100A11	1.83923	1.30362e-10	1.74372e-09	None	None	9.88485
TCHHL1	-0.483323	0.90394	NA	None	None	0.0438605
TCHH	-1.70016	0.0227578	0.0480316	None	None	1.64287
FLG-AS1	1.37188	0.51721	0.606099	None	None	0.286333
CRCT1	0	1	1	None	None	0
IVL	NA	NA	NA	None	None	NA
AL161636.1	NA	NA	NA	None	None	NA
PGLYRP4	3.21995	0.19595	0.280308	None	carbohydrate derivative catabolic process	0.707854
S100A9	2.82113	6.63655e-10	7.7454e-09	None	None	9.17806
S100A8	0	1	NA	None	None	0
S100A6	2.07076	4.21114e-09	4.22118e-08	None	None	8.3756
S100A4	2.30638	0.0395077	0.0762443	None	None	1.40332
S100A2	NA	NA	NA	None	None	NA
BX470102.2	6.05852	0.00172636	0.00524812	None	None	2.76287
S100A16	9.02233	0.00013857	0.000567136	None	None	3.85833
S100A13	-0.174923	0.686799	0.758613	None	None	0.163171
AL162258.2	-0.251007	0.75727	0.818802	None	None	0.120749
CHTOP	-0.212933	0.0763761	0.13149	None	None	1.11704
SNAPIN	1.62848	0.00132972	0.0041972	None	None	2.87624
ILF2	-0.159428	0.421737	0.515081	None	None	0.374958
NPR1	-0.400616	0.599491	0.681741	None	None	0.222218
INTS3	-0.474641	0.0947757	0.15729	None	None	1.0233
SLC27A3	-0.327931	0.800164	0.855057	None	None	0.0968212
GATAD2B	-0.846518	5.85463e-26	8.26024e-24	None	None	25.2325
AL358472.5	6.63817	2.72872e-05	0.000131698	None	None	4.56404
DENND4B	-1.02448	1.67631e-05	8.46956e-05	None	None	4.77564
CRTC2	-0.728388	0.00321659	0.00901109	None	None	2.4926
SLC39A1	0.389285	0.206667	0.292024	None	None	0.684729
AL358472.4	5.37902	1.06688e-06	6.87201e-06	None	None	5.97188
AL358472.3	3.79409	0.172477	0.254226	None	None	0.76327
CREB3L4	-0.745797	0.219261	0.305917	None	None	0.659039
JTB	0.261131	0.0785517	0.134683	None	None	1.10484
AL358472.2	5.50256	0.195792	0.280175	None	None	0.708206
RAB13	1.29636	1.00927e-09	1.14419e-08	None	None	8.99599
RPS27	3.25142	NA	NA	None	cytoplasmic translation	NA
NUP210L	2.37593	2.59119e-09	2.71633e-08	None	None	8.5865
TPM3	0.853573	3.40775e-09	3.48715e-08	None	None	8.46753
C1orf189	4.18118	0.0128632	0.0294933	None	None	1.89065
C1orf43	-0.0746529	0.621971	0.702488	None	None	0.20623
UBAP2L	-0.718241	1.38947e-07	1.05072e-06	None	None	6.85715
HAX1	1.41898	3.59627e-08	3.0348e-07	None	None	7.44415
ATP8B2	-2.03389	0.159314	0.239558	None	None	0.797747
IL6R-AS1	0	1	1	None	None	0
IL6R	0.501678	0.695938	0.766406	None	None	0.15743
SHE	-2.52397	0.277302	0.367006	None	None	0.557047
TDRD10	-1.55244	0.630548	0.710267	None	None	0.200282
UBE2Q1	-0.800141	0.00333598	0.00928995	None	None	2.47678
ADAR	0.147002	0.623295	0.703791	None	None	0.205306
KCNN3	3.37918	0.0479293	0.0894289	None	None	1.3194
PMVK	1.56911	4.54776e-16	1.82256e-14	None	None	15.3422
AL451085.1	6.80077	0.0208537	0.0445705	None	None	1.68082
PBXIP1	2.19112	7.90001e-10	9.12177e-09	None	None	9.10237
PYGO2	1.10095	1.14988e-09	1.288e-08	None	None	8.93935
AL451085.2	6.73317	0.0223041	0.0471851	None	None	1.65162
SHC1	0.503142	0.343548	0.435733	None	None	0.464013
CKS1B	1.7054	9.10533e-06	4.90099e-05	None	None	5.0407
FLAD1	0.531924	0.0112202	0.026267	None	None	1.95
ZBTB7B	0.496242	0.0140733	0.0318882	None	None	1.8516
DCST2	1.9028	0.0673921	0.118478	None	None	1.17139
DCST1	5.40787	0.00987166	0.023526	None	None	2.00561
ADAM15	2.02716	7.22945e-11	1.01031e-09	None	None	10.1409
EFNA4	1.59182	NA	NA	None	None	NA
EFNA1	0.279292	0.52229	0.61094	None	None	0.282088
SLC50A1	1.63348	2.43845e-10	3.08726e-09	None	None	9.61289
DPM3	1.17917	0.165297	0.246441	None	None	0.781736
KRTCAP2	2.00656	0.0713716	0.124444	None	None	1.14647
TRIM46	8.07196	3.49492e-08	2.95776e-07	None	None	7.45656
MUC1	0	1	1	None	None	0
AC234582.1	6.59005	NA	NA	None	None	NA
THBS3	0.644131	0.0433729	0.0823294	None	None	1.36278
MTX1	1.59044	2.65396e-07	1.91083e-06	None	None	6.57611
GBA	1.58898	4.3455e-06	2.50386e-05	None	None	5.36196
FAM189B	-0.0335703	0.87644	0.916296	None	None	0.0572778
SCAMP3	0.837104	0.000597868	0.00206255	None	None	3.22339
CLK2	0.0328546	0.826872	0.876743	None	None	0.0825618
HCN3	5.59082	0.0162775	0.0360938	None	None	1.78841
PKLR	-4.77745	0.152452	0.231225	None	None	0.816868
FDPS	2.09831	6.78185e-07	4.53569e-06	None	None	6.16865
RUSC1-AS1	2.60034	0.0471172	0.0880812	None	None	1.32682
RUSC1	0.115073	0.713374	0.781721	None	None	0.146683
ASH1L	-0.276098	0.0103471	0.0245129	None	None	1.98518
ASH1L-IT1	0	1	NA	None	None	0
ASH1L-AS1	2.11296	0.0684673	0.120133	None	None	1.16452
MSTO1	1.27182	0.107651	0.174401	None	None	0.967981
AL353807.5	7.70514	1.2236e-05	6.39396e-05	None	None	4.91236
YY1AP1	0.0118537	0.935692	0.959819	None	None	0.028867
DAP3	0.347843	0.24194	0.330157	None	None	0.616292
GON4L	-0.527146	0.000644636	0.00220579	None	None	3.19069
SYT11	1.17623	0.788095	NA	None	None	0.103421
RIT1	-0.316999	0.132695	0.206824	None	None	0.877145
KHDC4	-0.481742	0.00243648	0.00709586	None	None	2.61324
ARHGEF2	-1.66373	1.46311e-11	2.41689e-10	None	None	10.8347
AL355388.2	-3.04201	0.269352	0.358608	None	None	0.56968
AL355388.1	NA	NA	NA	None	None	NA
AL355388.3	9.36186	3.09823e-11	4.71695e-10	None	None	10.5089
SSR2	1.31502	3.29094e-05	0.000156054	None	None	4.48268
UBQLN4	-0.436441	0.0970568	0.160277	None	None	1.01297
LAMTOR2	1.14799	4.08215e-06	2.36004e-05	None	None	5.38911
RAB25	2.27268	1.21561e-20	9.30866e-19	None	None	19.9152
MEX3A	-0.653074	0.687525	0.759211	None	None	0.162712
LMNA	0.528052	0.0358275	0.0703538	None	None	1.44578
SEMA4A	-1.85056	0.00396053	0.0107729	None	None	2.40225
SLC25A44	1.17558	1.8888e-07	1.39403e-06	None	None	6.72382
PMF1	0.648972	NA	NA	None	None	NA
BGLAP	2.03961	0.225029	0.311999	None	None	0.647762
PAQR6	1.7909	0.190235	0.274013	None	None	0.720709
SMG5	-0.211114	0.388694	0.481578	None	None	0.410392
TMEM79	1.00284	5.39434e-11	7.7705e-10	None	None	10.2681
GLMP	1.1698	1.272e-08	1.15989e-07	None	None	7.89551
CCT3	-0.444051	0.000456891	0.00162885	None	None	3.34019
TSACC	1.12759	0.00408531	0.0110699	None	None	2.38877
C1orf61	-1.19313	0.0806294	0.137679	None	None	1.09351
[truncated: 29,440 more rows]
